# Supplementary material for: Effect of Dietary Tryptophan on Growth, Intestinal Microbiota, and Intestinal Gene Expression in an Improved Triploid Crucian Carp
Source: Front Nutr. 2021 Jun 17;8:676035. doi: 10.3389/fnut.2021.676035 (PMC8247481; doi:10.3389/fnut.2021.676035)
Supplement: Supplementary file 3 [file Table_3.xlsx]

## Sheet: 6.35Trpvs1.85Trp_GOEnrichment
GO_accession	Description	Term_type	Over_represented_pValue	Corrected_pValue	DEG_item	DEG_list	Bg_item	Bg_list	Gene_names
GO:0003774	motor activity	molecular_function	8.5442e-12	4.3063e-08	47	1654	462	49533	Cluster-34894.79586,Cluster-34894.72209,Cluster-34894.50292,Cluster-17437.0,Cluster-34894.32274,Cluster-34894.15343,Cluster-34894.72212,Cluster-34894.39312,Cluster-34894.78905,Cluster-34894.78553,Cluster-34894.26752,Cluster-34894.72211,Cluster-34894.96049,Cluster-34894.72787,Cluster-34894.84190,Cluster-34894.41360,Cluster-34894.72788,Cluster-34894.15344,Cluster-34894.11709,Cluster-34894.66718,Clu…
GO:0016459	myosin complex	cellular_component	1.0653e-09	2.6845e-06	33	1654	304	49533	Cluster-34894.72212,Cluster-34894.15343,Cluster-34894.32274,Cluster-17437.0,Cluster-34894.50292,Cluster-34894.72209,Cluster-34894.11709,Cluster-34894.15344,Cluster-34894.41360,Cluster-34894.72788,Cluster-34894.84190,Cluster-34894.72787,Cluster-34894.26752,Cluster-34894.72211,Cluster-34894.39312,Cluster-34894.68496,Cluster-34894.45539,Cluster-34894.8057,Cluster-34894.29510,Cluster-34894.23460,Clus…
GO:0015629	actin cytoskeleton	cellular_component	1.0234e-07	0.00017193	38	1654	442	49533	Cluster-34894.72210,Cluster-34894.5705,Cluster-34894.68407,Cluster-34894.8057,Cluster-34894.68496,Cluster-34894.45539,Cluster-34894.23460,Cluster-34894.29510,Cluster-34894.11265,Cluster-34894.96990,Cluster-34894.36612,Cluster-34894.92978,Cluster-34894.89204,Cluster-34894.10101,Cluster-34894.21275,Cluster-34894.31116,Cluster-34894.60505,Cluster-34894.72213,Cluster-34894.52115,Cluster-17437.0,Clust…
GO:0005524	ATP binding	molecular_function	2.244e-07	0.00025463	186	1654	3640	49533	Cluster-34894.87116,Cluster-34894.78553,Cluster-34894.26752,Cluster-34894.92936,Cluster-34894.81865,Cluster-34894.83955,Cluster-34894.102600,Cluster-34894.24887,Cluster-34894.8368,Cluster-34894.45376,Cluster-22875.0,Cluster-17437.0,Cluster-34894.103691,Cluster-34894.50292,Cluster-34894.72209,Cluster-34894.76188,Cluster-34894.60924,Cluster-34894.79586,Cluster-34894.48742,Cluster-34894.7700,Cluster…
GO:0032559	adenyl ribonucleotide binding	molecular_function	2.5261e-07	0.00025463	186	1654	3647	49533	Cluster-34894.80767,Cluster-34894.72788,Cluster-34894.11709,Cluster-34894.66718,Cluster-34894.17291,Cluster-34894.21077,Cluster-34894.76226,Cluster-34894.70001,Cluster-34894.44517,Cluster-34894.45762,Cluster-34894.82207,Cluster-34894.104963,Cluster-34894.48260,Cluster-34894.78970,Cluster-34894.81805,Cluster-34894.37824,Cluster-34894.16712,Cluster-34894.17432,Cluster-34894.98975,Cluster-34894.7856…
GO:0043168	anion binding	molecular_function	3.7613e-07	0.00025603	250	1654	5243	49533	Cluster-34894.74971,Cluster-34894.35505,Cluster-34894.17294,Cluster-34894.89545,Cluster-34894.33579,Cluster-34894.34327,Cluster-34894.36582,Cluster-34894.104654,Cluster-34894.29020,Cluster-24315.0,Cluster-34894.81176,Cluster-34894.64571,Cluster-34894.45427,Cluster-34894.104310,Cluster-34894.64310,Cluster-34894.17296,Cluster-34894.34030,Cluster-34894.69999,Cluster-34894.70508,Cluster-34894.103235,…
GO:0015293	symporter activity	molecular_function	4.064e-07	0.00025603	18	1654	126	49533	Cluster-34894.95734,Cluster-34894.55066,Cluster-32401.0,Cluster-34894.55621,Cluster-34894.53033,Cluster-34894.66729,Cluster-34894.85012,Cluster-34894.22411,Cluster-34894.48036,Cluster-34894.101377,Cluster-34894.51294,Cluster-34894.18447,Cluster-34894.15804,Cluster-34894.58281,Cluster-34894.68013,Cluster-34894.21131,Cluster-34894.49687,Cluster-34894.47234
GO:0015294	solute:cation symporter activity	molecular_function	4.064e-07	0.00025603	18	1654	126	49533	Cluster-34894.47234,Cluster-34894.49687,Cluster-34894.68013,Cluster-34894.21131,Cluster-34894.58281,Cluster-34894.18447,Cluster-34894.51294,Cluster-34894.15804,Cluster-34894.85012,Cluster-34894.66729,Cluster-34894.101377,Cluster-34894.48036,Cluster-34894.22411,Cluster-34894.55621,Cluster-32401.0,Cluster-34894.53033,Cluster-34894.95734,Cluster-34894.55066
GO:0004181	metallocarboxypeptidase activity	molecular_function	5.5686e-07	0.00031184	10	1654	35	49533	Cluster-22706.0,Cluster-34894.29696,Cluster-34894.96484,Cluster-34894.99200,Cluster-34894.83945,Cluster-34894.83944,Cluster-34894.18072,Cluster-34894.83943,Cluster-34894.96483,Cluster-34894.15114
GO:0030554	adenyl nucleotide binding	molecular_function	6.8789e-07	0.0003467	188	1654	3730	49533	Cluster-15271.0,Cluster-34894.39312,Cluster-34894.91000,Cluster-34894.77905,Cluster-34894.100795,Cluster-34894.72787,Cluster-34894.53865,Cluster-34894.63056,Cluster-34894.93780,Cluster-34894.70519,Cluster-34894.84190,Cluster-34894.83060,Cluster-34894.93280,Cluster-34894.52311,Cluster-34894.15344,Cluster-34894.15240,Cluster-34894.22527,Cluster-34894.96812,Cluster-34894.54183,Cluster-34894.30408,Cl…
GO:0043167	ion binding	molecular_function	9.5524e-07	0.00043767	513	1654	12307	49533	Cluster-34894.95617,Cluster-34894.57788,Cluster-26286.0,Cluster-34894.24883,Cluster-34894.10101,Cluster-34894.58131,Cluster-17519.0,Cluster-34894.18076,Cluster-36750.0,Cluster-34894.104639,Cluster-34894.30100,Cluster-34894.88457,Cluster-34894.46661,Cluster-34894.12610,Cluster-34894.37400,Cluster-34894.52725,Cluster-34894.96715,Cluster-34894.6752,Cluster-34894.41359,Cluster-34894.93780,Cluster-348…
GO:0008235	metalloexopeptidase activity	molecular_function	1.0625e-06	0.00044624	10	1654	38	49533	Cluster-34894.96484,Cluster-22706.0,Cluster-34894.29696,Cluster-34894.99200,Cluster-34894.83945,Cluster-34894.96483,Cluster-34894.15114,Cluster-34894.83944,Cluster-34894.83943,Cluster-34894.18072
GO:0005319	lipid transporter activity	molecular_function	1.6984e-06	0.00065845	13	1654	77	49533	Cluster-34894.44967,Cluster-34894.60363,Cluster-34894.56151,Cluster-34894.28007,Cluster-34894.44965,Cluster-34894.44966,Cluster-34894.44960,Cluster-34894.61202,Cluster-34894.58726,Cluster-34894.22488,Cluster-34894.61660,Cluster-34894.57734,Cluster-34894.48346
GO:0005326	neurotransmitter transporter activity	molecular_function	3.4537e-06	0.0011007	13	1654	82	49533	Cluster-34894.49687,Cluster-34894.22411,Cluster-34894.48036,Cluster-34894.66729,Cluster-34894.53033,Cluster-34894.68013,Cluster-34894.21131,Cluster-34894.55621,Cluster-34894.55066,Cluster-34894.95734,Cluster-34894.58281,Cluster-34894.18447,Cluster-34894.51294
GO:0005328	neurotransmitter:sodium symporter activity	molecular_function	3.4537e-06	0.0011007	13	1654	82	49533	Cluster-34894.48036,Cluster-34894.49687,Cluster-34894.22411,Cluster-34894.66729,Cluster-34894.53033,Cluster-34894.55621,Cluster-34894.21131,Cluster-34894.68013,Cluster-34894.55066,Cluster-34894.95734,Cluster-34894.58281,Cluster-34894.51294,Cluster-34894.18447
GO:0015370	solute:sodium symporter activity	molecular_function	3.4944e-06	0.0011007	15	1654	105	49533	Cluster-34894.53033,Cluster-34894.55621,Cluster-34894.21131,Cluster-34894.68013,Cluster-34894.48036,Cluster-34894.47234,Cluster-34894.22411,Cluster-34894.49687,Cluster-34894.66729,Cluster-34894.18447,Cluster-34894.51294,Cluster-34894.15804,Cluster-34894.55066,Cluster-34894.95734,Cluster-34894.58281
GO:0032555	purine ribonucleotide binding	molecular_function	1.3292e-05	0.0039406	213	1654	4512	49533	Cluster-34894.39312,Cluster-34894.100795,Cluster-34894.77905,Cluster-15271.0,Cluster-34894.63056,Cluster-34894.72787,Cluster-34894.53865,Cluster-34894.93780,Cluster-34894.84190,Cluster-34894.70519,Cluster-34894.83060,Cluster-34894.15723,Cluster-34894.15344,Cluster-34894.93280,Cluster-34894.52311,Cluster-34894.30408,Cluster-34894.15240,Cluster-34894.22527,Cluster-34894.96812,Cluster-34894.54183,Cl…
GO:0035639	purine ribonucleoside triphosphate binding	molecular_function	2.1479e-05	0.0046358	211	1654	4494	49533	Cluster-34894.35505,Cluster-34894.74971,Cluster-34894.17294,Cluster-34894.34327,Cluster-34894.89545,Cluster-34894.64571,Cluster-24315.0,Cluster-34894.29020,Cluster-34894.81176,Cluster-34894.45427,Cluster-34894.104310,Cluster-34894.64310,Cluster-34894.17296,Cluster-34894.34030,Cluster-34894.69999,Cluster-34894.70508,Cluster-34894.69855,Cluster-34894.36612,Cluster-34894.92978,Cluster-34894.95237,Cl…
GO:0032553	ribonucleotide binding	molecular_function	2.1693e-05	0.0046358	213	1654	4544	49533	Cluster-34894.17291,Cluster-34894.21077,Cluster-34894.76226,Cluster-34894.80767,Cluster-34894.72788,Cluster-34894.94927,Cluster-34894.66718,Cluster-34894.11709,Cluster-34894.81805,Cluster-34894.37824,Cluster-34894.16712,Cluster-34894.98975,Cluster-34894.17432,Cluster-34894.55631,Cluster-34894.44517,Cluster-34894.70001,Cluster-34894.45762,Cluster-34894.82207,Cluster-34894.29132,Cluster-34894.10496…
GO:0001883	purine nucleoside binding	molecular_function	2.2528e-05	0.0046358	211	1654	4497	49533	Cluster-26628.0,Cluster-34894.78905,Cluster-34894.86735,Cluster-16758.1,Cluster-34894.17293,Cluster-34894.72211,Cluster-34894.17292,Cluster-34894.86322,Cluster-34894.43877,Cluster-19987.1,Cluster-34894.99031,Cluster-34894.67261,Cluster-34894.19109,Cluster-34894.32274,Cluster-34894.27829,Cluster-34894.11711,Cluster-34894.41957,Cluster-34894.15343,Cluster-34894.104516,Cluster-34894.18035,Cluster-34…
GO:0032549	ribonucleoside binding	molecular_function	2.2528e-05	0.0046358	211	1654	4497	49533	Cluster-34894.102323,Cluster-34894.68496,Cluster-34894.63873,Cluster-34894.82882,Cluster-34894.34704,Cluster-34894.29510,Cluster-34894.19990,Cluster-34894.84961,Cluster-34894.68407,Cluster-34894.54433,Cluster-34894.108385,Cluster-34894.46661,Cluster-34894.85540,Cluster-34894.76815,Cluster-34894.10101,Cluster-34894.64717,Cluster-34894.102496,Cluster-34300.0,Cluster-34894.38003,Cluster-34894.60505,…
GO:0032550	purine ribonucleoside binding	molecular_function	2.2528e-05	0.0046358	211	1654	4497	49533	Cluster-34894.39312,Cluster-34894.77905,Cluster-34894.100795,Cluster-15271.0,Cluster-34894.63056,Cluster-34894.72787,Cluster-34894.53865,Cluster-34894.93780,Cluster-34894.83060,Cluster-34894.70519,Cluster-34894.84190,Cluster-34894.15723,Cluster-34894.15344,Cluster-34894.93280,Cluster-34894.52311,Cluster-34894.30408,Cluster-34894.22527,Cluster-34894.15240,Cluster-34894.96812,Cluster-34894.54183,Cl…
GO:0006554	lysine catabolic process	biological_process	2.3838e-05	0.0046358	14	1654	100	49533	Cluster-34894.61730,Cluster-34894.27841,Cluster-34894.7650,Cluster-34894.42545,Cluster-34894.96657,Cluster-34894.63399,Cluster-34894.99970,Cluster-34894.61254,Cluster-34894.63617,Cluster-34894.99221,Cluster-34894.41191,Cluster-34894.7647,Cluster-34894.96635,Cluster-34894.61252
GO:0009068	aspartate family amino acid catabolic process	biological_process	2.3838e-05	0.0046358	14	1654	100	49533	Cluster-34894.99221,Cluster-34894.63617,Cluster-34894.61254,Cluster-34894.99970,Cluster-34894.96635,Cluster-34894.61252,Cluster-34894.7647,Cluster-34894.41191,Cluster-34894.27841,Cluster-34894.61730,Cluster-34894.63399,Cluster-34894.96657,Cluster-34894.7650,Cluster-34894.42545
GO:0006550	isoleucine catabolic process	biological_process	2.5754e-05	0.0046358	10	1654	52	49533	Cluster-34894.27841,Cluster-34894.61730,Cluster-34894.56266,Cluster-34894.59652,Cluster-34894.42545,Cluster-34894.63617,Cluster-34894.61254,Cluster-34894.61252,Cluster-34894.96635,Cluster-34894.53949
GO:0006552	leucine catabolic process	biological_process	2.5754e-05	0.0046358	10	1654	52	49533	Cluster-34894.27841,Cluster-34894.61730,Cluster-34894.56266,Cluster-34894.42545,Cluster-34894.59652,Cluster-34894.61254,Cluster-34894.63617,Cluster-34894.96635,Cluster-34894.61252,Cluster-34894.53949
GO:0006574	valine catabolic process	biological_process	2.5754e-05	0.0046358	10	1654	52	49533	Cluster-34894.53949,Cluster-34894.96635,Cluster-34894.61252,Cluster-34894.63617,Cluster-34894.61254,Cluster-34894.59652,Cluster-34894.42545,Cluster-34894.61730,Cluster-34894.27841,Cluster-34894.56266
GO:0009083	branched-chain amino acid catabolic process	biological_process	2.5754e-05	0.0046358	10	1654	52	49533	Cluster-34894.96635,Cluster-34894.53949,Cluster-34894.61252,Cluster-34894.63617,Cluster-34894.61254,Cluster-34894.59652,Cluster-34894.42545,Cluster-34894.61730,Cluster-34894.27841,Cluster-34894.56266
GO:0015291	secondary active transmembrane transporter activity	molecular_function	2.8785e-05	0.0050027	21	1654	218	49533	Cluster-34894.58281,Cluster-34894.51294,Cluster-34894.18447,Cluster-34894.15804,Cluster-34894.70759,Cluster-34894.47234,Cluster-34894.49687,Cluster-34894.55671,Cluster-34894.68013,Cluster-34894.21131,Cluster-34894.55066,Cluster-34894.95734,Cluster-34894.101377,Cluster-34894.48036,Cluster-34894.61525,Cluster-34894.22411,Cluster-34894.85012,Cluster-34894.66729,Cluster-34894.53033,Cluster-34894.5562…
GO:0001882	nucleoside binding	molecular_function	3.0742e-05	0.0051647	212	1654	4553	49533	Cluster-17055.1,Cluster-34894.33109,Cluster-34894.83148,Cluster-34894.30583,Cluster-34894.24583,Cluster-34894.28084,Cluster-34894.40392,Cluster-34894.23460,Cluster-34894.18699,Cluster-34894.72210,Cluster-34894.36549,Cluster-34894.99221,Cluster-34894.83063,Cluster-19093.0,Cluster-34894.32236,Cluster-34894.8253,Cluster-34894.103965,Cluster-34894.63209,Cluster-14563.0,Cluster-34894.5288,Cluster-3489…
GO:0017076	purine nucleotide binding	molecular_function	3.2956e-05	0.005358	214	1654	4612	49533	Cluster-34894.36035,Cluster-34894.52115,Cluster-34894.17434,Cluster-34894.5288,Cluster-34894.13879,Cluster-34894.14312,Cluster-34894.105470,Cluster-34894.59492,Cluster-34894.96990,Cluster-34894.30407,Cluster-34894.41391,Cluster-34894.37325,Cluster-34894.21651,Cluster-34894.28084,Cluster-34894.23460,Cluster-34894.40392,Cluster-34894.33109,Cluster-34894.83148,Cluster-17055.1,Cluster-34894.24583,Clu…
GO:0006836	neurotransmitter transport	biological_process	3.4641e-05	0.005456	13	1654	101	49533	Cluster-34894.53033,Cluster-34894.68013,Cluster-34894.21131,Cluster-34894.55621,Cluster-34894.22411,Cluster-34894.49687,Cluster-34894.48036,Cluster-34894.66729,Cluster-34894.18447,Cluster-34894.51294,Cluster-34894.55066,Cluster-34894.58281,Cluster-34894.95734
GO:0097367	carbohydrate derivative binding	molecular_function	4.1386e-05	0.0063208	221	1654	4813	49533	Cluster-34894.5288,Cluster-34894.13879,Cluster-34894.17434,Cluster-34894.52115,Cluster-34894.29731,Cluster-34894.36035,Cluster-34894.21651,Cluster-34894.37325,Cluster-34894.41391,Cluster-34894.105470,Cluster-34894.30407,Cluster-34894.59492,Cluster-34894.96990,Cluster-34894.14312,Cluster-34894.30583,Cluster-34894.24583,Cluster-17055.1,Cluster-34894.33109,Cluster-34894.83148,Cluster-34894.40392,Clu…
GO:0006553	lysine metabolic process	biological_process	6.0421e-05	0.0089565	14	1654	110	49533	Cluster-34894.63399,Cluster-34894.96657,Cluster-34894.7650,Cluster-34894.42545,Cluster-34894.61730,Cluster-34894.27841,Cluster-34894.61252,Cluster-34894.96635,Cluster-34894.7647,Cluster-34894.41191,Cluster-34894.99221,Cluster-34894.63617,Cluster-34894.61254,Cluster-34894.99970
GO:0000166	nucleotide binding	molecular_function	6.4599e-05	0.0090438	234	1654	5159	49533	Cluster-34894.17291,Cluster-34894.21077,Cluster-34894.76226,Cluster-34894.66718,Cluster-34894.11709,Cluster-34894.80767,Cluster-34894.72788,Cluster-34894.94927,Cluster-34894.16712,Cluster-34894.17432,Cluster-34894.98975,Cluster-34894.59881,Cluster-34894.55631,Cluster-34894.81805,Cluster-34894.37824,Cluster-34894.104963,Cluster-34894.29132,Cluster-34894.78970,Cluster-34894.48260,Cluster-34894.4451…
GO:1901265	nucleoside phosphate binding	molecular_function	6.4599e-05	0.0090438	234	1654	5159	49533	Cluster-34894.109466,Cluster-34894.30408,Cluster-34894.22527,Cluster-34894.15240,Cluster-34894.96812,Cluster-34894.54183,Cluster-34894.17744,Cluster-34894.65259,Cluster-34894.104592,Cluster-34894.27841,Cluster-34894.100797,Cluster-34894.99967,Cluster-34894.72212,Cluster-34894.39312,Cluster-34894.91000,Cluster-34894.100795,Cluster-34894.63117,Cluster-34894.77905,Cluster-15271.0,Cluster-34894.10461…
GO:0010876	lipid localization	biological_process	7.1173e-05	0.009695	27	1654	340	49533	Cluster-34894.95221,Cluster-34894.22488,Cluster-34894.61660,Cluster-34894.12115,Cluster-34894.53590,Cluster-34894.61202,Cluster-34894.29868,Cluster-34894.48346,Cluster-7665.0,Cluster-34894.28007,Cluster-34894.56151,Cluster-34894.44965,Cluster-34894.60834,Cluster-34894.44967,Cluster-34894.76188,Cluster-34894.44960,Cluster-34894.38069,Cluster-34894.44966,Cluster-34894.58726,Cluster-34894.27174,Clus…
GO:0036094	small molecule binding	molecular_function	9.1454e-05	0.01213	238	1654	5299	49533	Cluster-34894.107067,Cluster-34894.18035,Cluster-34894.104516,Cluster-30483.0,Cluster-34894.29868,Cluster-34894.81829,Cluster-34894.29377,Cluster-34894.41957,Cluster-34894.15343,Cluster-34894.32274,Cluster-34894.27829,Cluster-34894.11711,Cluster-34894.67261,Cluster-34894.19109,Cluster-34894.99031,Cluster-34894.86322,Cluster-34894.17292,Cluster-34894.43877,Cluster-19987.1,Cluster-34894.17293,Clust…
GO:1901606	alpha-amino acid catabolic process	biological_process	9.9815e-05	0.012899	17	1654	161	49533	Cluster-34894.61254,Cluster-34894.53949,Cluster-34894.61252,Cluster-34894.56266,Cluster-34894.63399,Cluster-34894.96657,Cluster-34894.99970,Cluster-34894.99221,Cluster-34894.63617,Cluster-34894.41191,Cluster-34894.96635,Cluster-34894.7647,Cluster-34894.27841,Cluster-34894.61730,Cluster-34894.7650,Cluster-34894.42545,Cluster-34894.59652
GO:0072330	monocarboxylic acid biosynthetic process	biological_process	0.00012544	0.015806	21	1654	231	49533	Cluster-34894.61252,Cluster-34894.53949,Cluster-34894.26738,Cluster-34894.33419,Cluster-34894.17291,Cluster-34894.61254,Cluster-34894.76650,Cluster-34894.36035,Cluster-34894.64717,Cluster-34894.13879,Cluster-34894.17294,Cluster-34894.96635,Cluster-34894.63209,Cluster-34894.92759,Cluster-34894.45376,Cluster-34894.51231,Cluster-34894.63617,Cluster-34894.42545,Cluster-34894.104963,Cluster-34894.2784…
GO:0016787	hydrolase activity	molecular_function	0.00014837	0.018239	328	1654	7765	49533	Cluster-34894.57438,Cluster-34894.34327,Cluster-34894.73861,Cluster-34894.96472,Cluster-34894.96312,Cluster-34894.2329,Cluster-34894.36758,Cluster-34894.15239,Cluster-34894.104310,Cluster-34894.104525,Cluster-36048.0,Cluster-34894.45427,Cluster-34894.71301,Cluster-34894.75683,Cluster-34894.83943,Cluster-34894.11265,Cluster-34894.18135,Cluster-34894.95237,Cluster-34894.52154,Cluster-34894.36612,Cl…
GO:0004180	carboxypeptidase activity	molecular_function	0.00015825	0.01899	10	1654	66	49533	Cluster-34894.83944,Cluster-34894.18072,Cluster-34894.83943,Cluster-34894.96483,Cluster-34894.15114,Cluster-22706.0,Cluster-34894.29696,Cluster-34894.96484,Cluster-34894.99200,Cluster-34894.83945
GO:1901605	alpha-amino acid metabolic process	biological_process	0.00016653	0.019519	92	1654	1771	49533	Cluster-34894.43602,Cluster-34894.42545,Cluster-34894.14205,Cluster-34894.52963,Cluster-34894.101694,Cluster-34894.31774,Cluster-34894.41191,Cluster-34894.90581,Cluster-26286.0,Cluster-34894.62878,Cluster-34894.56266,Cluster-34894.46259,Cluster-34894.14416,Cluster-34894.61254,Cluster-34894.15889,Cluster-34894.75683,Cluster-34894.47056,Cluster-34894.69855,Cluster-34894.98548,Cluster-34894.53949,Cl…
GO:0003777	microtubule motor activity	molecular_function	0.00021376	0.024486	12	1654	100	49533	Cluster-34894.17296,Cluster-34894.66718,Cluster-34894.78560,Cluster-34894.105470,Cluster-34894.79586,Cluster-34894.64041,Cluster-34894.78905,Cluster-34894.79588,Cluster-34894.14312,Cluster-34894.21651,Cluster-34894.78553,Cluster-34894.78551
GO:0006633	fatty acid biosynthetic process	biological_process	0.00025403	0.028451	16	1654	158	49533	Cluster-34894.61730,Cluster-34894.27841,Cluster-34894.42545,Cluster-34894.63617,Cluster-34894.51231,Cluster-34894.92759,Cluster-34894.96635,Cluster-34894.17294,Cluster-34894.13879,Cluster-34894.76650,Cluster-34894.61254,Cluster-34894.17291,Cluster-34894.33419,Cluster-34894.26738,Cluster-34894.61252,Cluster-34894.53949
GO:0009069	serine family amino acid metabolic process	biological_process	0.00026229	0.028681	38	1654	572	49533	Cluster-34894.83329,Cluster-34894.53542,Cluster-34894.62363,Cluster-34894.27829,Cluster-34894.54183,Cluster-34894.19109,Cluster-34894.81805,Cluster-34894.99967,Cluster-34894.100797,Cluster-34894.65517,Cluster-34894.97671,Cluster-34894.17719,Cluster-34894.81215,Cluster-34894.25219,Cluster-34894.83331,Cluster-34894.24432,Cluster-15271.0,Cluster-34894.100795,Cluster-18203.0,Cluster-34894.81865,Clust…
GO:0006549	isoleucine metabolic process	biological_process	0.00027316	0.028681	10	1654	71	49533	Cluster-34894.42545,Cluster-34894.59652,Cluster-34894.61730,Cluster-34894.27841,Cluster-34894.56266,Cluster-34894.61252,Cluster-34894.53949,Cluster-34894.96635,Cluster-34894.61254,Cluster-34894.63617
GO:0006573	valine metabolic process	biological_process	0.00027316	0.028681	10	1654	71	49533	Cluster-34894.61252,Cluster-34894.53949,Cluster-34894.96635,Cluster-34894.63617,Cluster-34894.61254,Cluster-34894.59652,Cluster-34894.42545,Cluster-34894.56266,Cluster-34894.27841,Cluster-34894.61730
GO:0019752	carboxylic acid metabolic process	biological_process	0.00027963	0.028762	118	1654	2428	49533	Cluster-34894.61730,Cluster-34894.27841,Cluster-34894.37600,Cluster-34894.100797,Cluster-35241.0,Cluster-34894.99967,Cluster-34894.59652,Cluster-34894.97671,Cluster-34894.17719,Cluster-34894.45376,Cluster-34894.63617,Cluster-34894.83329,Cluster-34894.99970,Cluster-34894.64976,Cluster-34894.54183,Cluster-34894.86397,Cluster-34894.66806,Cluster-34894.81865,Cluster-34894.58638,Cluster-34894.15887,Cl…
GO:0009063	cellular amino acid catabolic process	biological_process	0.00030066	0.030307	17	1654	177	49533	Cluster-34894.96657,Cluster-34894.63399,Cluster-34894.56266,Cluster-34894.53949,Cluster-34894.61252,Cluster-34894.61254,Cluster-34894.59652,Cluster-34894.42545,Cluster-34894.7650,Cluster-34894.27841,Cluster-34894.61730,Cluster-34894.7647,Cluster-34894.96635,Cluster-34894.41191,Cluster-34894.63617,Cluster-34894.99221,Cluster-34894.99970
GO:0008238	exopeptidase activity	molecular_function	0.00034859	0.034449	20	1654	236	49533	Cluster-34894.15114,Cluster-34894.67888,Cluster-34894.96483,Cluster-34894.37587,Cluster-34894.18072,Cluster-34894.83944,Cluster-34894.14125,Cluster-34894.83945,Cluster-34894.99200,Cluster-34894.104525,Cluster-34894.96484,Cluster-34894.29696,Cluster-34894.89318,Cluster-34894.59172,Cluster-34894.36758,Cluster-34894.77692,Cluster-34894.83440,Cluster-34894.83943,Cluster-34894.56264,Cluster-22706.0
GO:0043436	oxoacid metabolic process	biological_process	0.00036376	0.035256	119	1654	2465	49533	Cluster-34894.1649,Cluster-34894.104963,Cluster-34894.65517,Cluster-34894.73498,Cluster-34894.81215,Cluster-34894.59881,Cluster-34894.53542,Cluster-34894.27829,Cluster-34894.62363,Cluster-34894.98975,Cluster-34894.10810,Cluster-34894.81805,Cluster-34894.19109,Cluster-34894.96635,Cluster-34894.17292,Cluster-4270.2,Cluster-34894.11016,Cluster-19987.1,Cluster-34894.25219,Cluster-34894.59484,Cluster-…
GO:0006869	lipid transport	biological_process	0.00038511	0.036621	24	1654	320	49533	Cluster-34894.60363,Cluster-34894.99500,Cluster-34894.98727,Cluster-34894.41713,Cluster-34894.50117,Cluster-34894.58726,Cluster-34894.27174,Cluster-34894.46259,Cluster-34894.57734,Cluster-34894.60834,Cluster-34894.56151,Cluster-34894.44965,Cluster-34894.28007,Cluster-34894.44967,Cluster-34894.44960,Cluster-34894.76188,Cluster-34894.38069,Cluster-34894.44966,Cluster-34894.61660,Cluster-34894.22488…
GO:0006082	organic acid metabolic process	biological_process	0.00042305	0.039485	119	1654	2473	49533	Cluster-34894.81865,Cluster-34894.66806,Cluster-34894.86397,Cluster-34894.11396,Cluster-34894.81972,Cluster-34894.15887,Cluster-34894.58638,Cluster-34894.83331,Cluster-34894.24432,Cluster-34894.6548,Cluster-15271.0,Cluster-34894.33419,Cluster-34894.26738,Cluster-18203.0,Cluster-34894.63117,Cluster-34894.100795,Cluster-34894.100797,Cluster-35241.0,Cluster-34894.99967,Cluster-34894.27841,Cluster-34…
GO:0005179	hormone activity	molecular_function	0.00045871	0.042034	27	1654	396	49533	Cluster-17208.0,Cluster-34894.100382,Cluster-34894.8270,Cluster-34894.98979,Cluster-34894.23059,Cluster-34894.47215,Cluster-28743.0,Cluster-34894.19109,Cluster-20776.0,Cluster-34894.110458,Cluster-34894.6970,Cluster-34894.6164,Cluster-34894.11427,Cluster-34894.56107,Cluster-34894.99031,Cluster-34894.35213,Cluster-34894.16038,Cluster-5103.0,Cluster-34894.15152,Cluster-34894.5821,Cluster-35523.0,Cl…
GO:0070011	peptidase activity, acting on L-amino acid peptides	molecular_function	0.00055269	0.049742	101	1654	2054	49533	Cluster-34894.29696,Cluster-34894.72901,Cluster-34894.37600,Cluster-34894.45002,Cluster-34894.15114,Cluster-34894.96483,Cluster-34894.37587,Cluster-34894.76305,Cluster-34894.18154,Cluster-34894.104957,Cluster-34894.17289,Cluster-33505.0,Cluster-34894.69856,Cluster-34894.96309,Cluster-34894.14125,Cluster-34894.17789,Cluster-34894.93780,Cluster-34894.50527,Cluster-34894.18155,Cluster-34894.43803,Cl…
GO:0044430	cytoskeletal part	cellular_component	0.00060576	0.053562	78	1654	1580	49533	Cluster-34894.50833,Cluster-34894.72787,Cluster-34894.71353,Cluster-34894.26752,Cluster-34894.78553,Cluster-34894.15713,Cluster-34894.39312,Cluster-34894.63685,Cluster-34894.15344,Cluster-34894.41360,Cluster-34894.12466,Cluster-34894.84190,Cluster-34894.15710,Cluster-34894.13548,Cluster-17437.0,Cluster-34894.97722,Cluster-34894.50292,Cluster-34894.72209,Cluster-34894.79586,Cluster-34894.15712,Clu…
GO:1901565	organonitrogen compound catabolic process	biological_process	0.000649	0.056396	23	1654	303	49533	Cluster-34894.56266,Cluster-34894.50285,Cluster-34894.96657,Cluster-34894.63399,Cluster-34894.29731,Cluster-34894.61254,Cluster-34894.53949,Cluster-34894.61252,Cluster-34894.18400,Cluster-34894.46408,Cluster-34894.27841,Cluster-34894.61730,Cluster-34894.109736,Cluster-34894.59652,Cluster-34894.7650,Cluster-34894.42545,Cluster-34894.63617,Cluster-34894.99221,Cluster-34894.14094,Cluster-34894.99970…
GO:0007155	cell adhesion	biological_process	0.00066122	0.056483	51	1654	935	49533	Cluster-34894.98267,Cluster-26774.0,Cluster-34894.15596,Cluster-34894.47768,Cluster-34894.6752,Cluster-34894.11573,Cluster-34894.100752,Cluster-34894.34267,Cluster-34894.11431,Cluster-34894.21929,Cluster-34894.22373,Cluster-34894.99239,Cluster-34894.44216,Cluster-34894.16375,Cluster-34368.0,Cluster-34894.14435,Cluster-35241.0,Cluster-34894.33974,Cluster-34894.57339,Cluster-34894.58131,Cluster-348…
GO:0005509	calcium ion binding	molecular_function	0.00077961	0.065487	58	1654	1080	49533	Cluster-34894.99070,Cluster-34894.100752,Cluster-34894.11573,Cluster-34894.9961,Cluster-34894.95541,Cluster-34894.14775,Cluster-34894.6752,Cluster-34894.15596,Cluster-34894.14783,Cluster-34894.14780,Cluster-34894.102605,Cluster-25267.0,Cluster-9183.0,Cluster-34894.100203,Cluster-34894.84689,Cluster-34894.46248,Cluster-34894.99676,Cluster-34894.9945,Cluster-34368.0,Cluster-34894.14435,Cluster-3489…
GO:0008233	peptidase activity	molecular_function	0.0008139	0.067247	108	1654	2259	49533	Cluster-34894.32665,Cluster-34894.58388,Cluster-34894.55056,Cluster-34894.81745,Cluster-34894.56264,Cluster-34894.74284,Cluster-34894.83440,Cluster-34894.101808,Cluster-34894.24884,Cluster-34894.77692,Cluster-34894.61808,Cluster-34894.31740,Cluster-34894.104963,Cluster-34894.67113,Cluster-34894.57486,Cluster-34894.84262,Cluster-34894.12629,Cluster-34894.104730,Cluster-34894.5681,Cluster-34894.846…
GO:0009066	aspartate family amino acid metabolic process	biological_process	0.00085742	0.0697	22	1654	288	49533	Cluster-34894.38372,Cluster-34894.63399,Cluster-34894.58638,Cluster-34894.96657,Cluster-34894.61254,Cluster-34894.83331,Cluster-34894.61252,Cluster-34894.99967,Cluster-34894.61730,Cluster-34894.27841,Cluster-34894.42545,Cluster-34894.7650,Cluster-34894.101694,Cluster-34894.83329,Cluster-34894.52963,Cluster-34894.99970,Cluster-34894.29157,Cluster-34894.99221,Cluster-34894.63617,Cluster-34894.41191…
GO:0007018	microtubule-based movement	biological_process	0.00092019	0.073616	12	1654	118	49533	Cluster-34894.66718,Cluster-34894.17296,Cluster-34894.78551,Cluster-34894.78553,Cluster-34894.21651,Cluster-34894.14312,Cluster-34894.79588,Cluster-34894.78905,Cluster-34894.64041,Cluster-34894.105470,Cluster-34894.78560,Cluster-34894.79586
GO:0005515	protein binding	molecular_function	0.00094772	0.074633	532	1654	13660	49533	Cluster-34894.2329,Cluster-34894.67851,Cluster-34894.33977,Cluster-34894.15239,Cluster-34894.78752,Cluster-17208.0,Cluster-34894.45427,Cluster-34894.35116,Cluster-34894.47215,Cluster-34894.8282,Cluster-34894.41414,Cluster-34894.48433,Cluster-34894.27174,Cluster-34894.63287,Cluster-34894.45004,Cluster-34894.79917,Cluster-34894.74316,Cluster-34894.68722,Cluster-34894.92236,Cluster-34894.25556,Clust…
GO:0006551	leucine metabolic process	biological_process	0.0010007	0.077595	10	1654	85	49533	Cluster-34894.61254,Cluster-34894.63617,Cluster-34894.53949,Cluster-34894.61252,Cluster-34894.96635,Cluster-34894.56266,Cluster-34894.27841,Cluster-34894.61730,Cluster-34894.42545,Cluster-34894.59652
GO:0003857	3-hydroxyacyl-CoA dehydrogenase activity	molecular_function	0.0010677	0.080963	7	1654	41	49533	Cluster-34894.63617,Cluster-34894.27841,Cluster-34894.61730,Cluster-34894.61254,Cluster-34894.96635,Cluster-34894.61252,Cluster-34894.42545
GO:0006520	cellular amino acid metabolic process	biological_process	0.0010763	0.080963	96	1654	1976	49533	Cluster-34894.47056,Cluster-34894.75683,Cluster-34894.15889,Cluster-34894.61254,Cluster-34894.53949,Cluster-34894.72520,Cluster-34894.98548,Cluster-34894.69855,Cluster-34894.56266,Cluster-34894.36444,Cluster-34894.62878,Cluster-26286.0,Cluster-34894.14416,Cluster-34894.46259,Cluster-34894.31774,Cluster-34894.101694,Cluster-34894.52963,Cluster-34894.19990,Cluster-34894.46661,Cluster-34894.90581,Cl…
GO:0004252	serine-type endopeptidase activity	molecular_function	0.0011423	0.084666	33	1654	536	49533	Cluster-34894.3115,Cluster-34894.61671,Cluster-34894.27174,Cluster-34894.65876,Cluster-34894.56173,Cluster-34894.96785,Cluster-34894.18135,Cluster-34894.71301,Cluster-34894.104525,Cluster-34894.38356,Cluster-34894.36758,Cluster-34894.18156,Cluster-34894.96472,Cluster-34894.96312,Cluster-34894.44036,Cluster-34894.53239,Cluster-34894.17789,Cluster-34894.18155,Cluster-34894.50527,Cluster-34894.55056…
GO:0022610	biological adhesion	biological_process	0.0014346	0.1034	51	1654	968	49533	Cluster-34894.16375,Cluster-34894.44216,Cluster-34894.99239,Cluster-34894.21929,Cluster-34894.22373,Cluster-34894.33974,Cluster-35241.0,Cluster-34894.14435,Cluster-34368.0,Cluster-34894.47768,Cluster-34894.15596,Cluster-26774.0,Cluster-34894.98267,Cluster-34894.11431,Cluster-34894.34267,Cluster-34894.11573,Cluster-34894.100752,Cluster-34894.6752,Cluster-34894.100733,Cluster-34894.16182,Cluster-34…
GO:0006534	cysteine metabolic process	biological_process	0.0014361	0.1034	5	1654	25	49533	Cluster-34894.65517,Cluster-34894.17719,Cluster-34894.62363,Cluster-34894.41391,Cluster-26286.0
GO:0006790	sulfur compound metabolic process	biological_process	0.0015356	0.109	25	1654	359	49533	Cluster-34894.59866,Cluster-34894.59652,Cluster-34894.19108,Cluster-34894.17719,Cluster-34894.76990,Cluster-34894.65517,Cluster-34894.81829,Cluster-34894.104963,Cluster-34894.1649,Cluster-34894.58719,Cluster-34894.74877,Cluster-34894.41191,Cluster-34894.29157,Cluster-34894.62363,Cluster-34894.52963,Cluster-34894.101694,Cluster-34894.72801,Cluster-34894.58638,Cluster-34894.38372,Cluster-34894.5626…
GO:0016054	organic acid catabolic process	biological_process	0.0016029	0.11067	17	1654	207	49533	Cluster-34894.61254,Cluster-34894.61252,Cluster-34894.53949,Cluster-34894.56266,Cluster-34894.96657,Cluster-34894.63399,Cluster-34894.99970,Cluster-34894.63617,Cluster-34894.99221,Cluster-34894.41191,Cluster-34894.7647,Cluster-34894.96635,Cluster-34894.61730,Cluster-34894.27841,Cluster-34894.7650,Cluster-34894.42545,Cluster-34894.59652
GO:0046395	carboxylic acid catabolic process	biological_process	0.0016029	0.11067	17	1654	207	49533	Cluster-34894.27841,Cluster-34894.61730,Cluster-34894.7650,Cluster-34894.42545,Cluster-34894.59652,Cluster-34894.99970,Cluster-34894.99221,Cluster-34894.63617,Cluster-34894.41191,Cluster-34894.96635,Cluster-34894.7647,Cluster-34894.56266,Cluster-34894.63399,Cluster-34894.96657,Cluster-34894.61254,Cluster-34894.53949,Cluster-34894.61252
GO:0005856	cytoskeleton	cellular_component	0.0017006	0.11582	83	1654	1767	49533	Cluster-34894.32274,Cluster-34894.44960,Cluster-34894.78970,Cluster-34894.104730,Cluster-34894.15715,Cluster-34894.15343,Cluster-34894.34494,Cluster-34894.72211,Cluster-1082.0,Cluster-34894.15714,Cluster-34894.96049,Cluster-34894.98727,Cluster-34894.53632,Cluster-34894.78905,Cluster-34894.66718,Cluster-34894.11709,Cluster-34894.72788,Cluster-34894.72210,Cluster-34894.5705,Cluster-34894.64041,Clus…
GO:0017111	nucleoside-triphosphatase activity	molecular_function	0.0019275	0.12953	100	1654	2121	49533	Cluster-34894.84961,Cluster-34894.108385,Cluster-34894.68407,Cluster-34894.54433,Cluster-34894.17296,Cluster-34894.68496,Cluster-34894.102323,Cluster-34894.64310,Cluster-34894.104310,Cluster-34894.69959,Cluster-34894.29510,Cluster-34894.81176,Cluster-34894.11265,Cluster-34894.95237,Cluster-34894.15653,Cluster-34894.92978,Cluster-34894.36612,Cluster-34894.76815,Cluster-34894.10101,Cluster-34894.60…
GO:0016462	pyrophosphatase activity	molecular_function	0.001978	0.13117	101	1654	2147	49533	Cluster-34894.8057,Cluster-34894.83148,Cluster-34894.95221,Cluster-34894.45539,Cluster-34894.59866,Cluster-34894.40392,Cluster-34894.15651,Cluster-34894.23460,Cluster-19845.0,Cluster-34894.28084,Cluster-34894.83063,Cluster-34894.72210,Cluster-34894.36549,Cluster-34894.5705,Cluster-34894.64041,Cluster-14514.0,Cluster-14563.0,Cluster-34894.32236,Cluster-34894.21275,Cluster-34894.110192,Cluster-3489…
GO:0044282	small molecule catabolic process	biological_process	0.0020579	0.13183	17	1654	213	49533	Cluster-34894.53949,Cluster-34894.61252,Cluster-34894.61254,Cluster-34894.96657,Cluster-34894.63399,Cluster-34894.56266,Cluster-34894.7647,Cluster-34894.96635,Cluster-34894.41191,Cluster-34894.63617,Cluster-34894.99221,Cluster-34894.99970,Cluster-34894.59652,Cluster-34894.7650,Cluster-34894.42545,Cluster-34894.27841,Cluster-34894.61730
GO:0019354	siroheme biosynthetic process	biological_process	0.0020926	0.13183	5	1654	25	49533	Cluster-34894.61254,Cluster-34894.101694,Cluster-34894.61252,Cluster-34894.77308,Cluster-34894.92197
GO:0043115	precorrin-2 dehydrogenase activity	molecular_function	0.0020926	0.13183	5	1654	25	49533	Cluster-34894.92197,Cluster-34894.61252,Cluster-34894.77308,Cluster-34894.61254,Cluster-34894.101694
GO:0046156	siroheme metabolic process	biological_process	0.0020926	0.13183	5	1654	25	49533	Cluster-34894.61254,Cluster-34894.101694,Cluster-34894.61252,Cluster-34894.77308,Cluster-34894.92197
GO:0008017	microtubule binding	molecular_function	0.0021722	0.1349	19	1654	270	49533	Cluster-34894.68407,Cluster-22213.1,Cluster-34894.79586,Cluster-34894.64041,Cluster-34894.16182,Cluster-34894.19751,Cluster-34894.15715,Cluster-34894.17296,Cluster-34894.78905,Cluster-34894.79588,Cluster-34894.14312,Cluster-34894.105470,Cluster-34894.78560,Cluster-34894.78551,Cluster-34894.96049,Cluster-1082.0,Cluster-34894.21651,Cluster-34894.78553,Cluster-34894.66718
GO:0009081	branched-chain amino acid metabolic process	biological_process	0.0021948	0.1349	10	1654	96	49533	Cluster-34894.42545,Cluster-34894.59652,Cluster-34894.27841,Cluster-34894.56266,Cluster-34894.61730,Cluster-34894.61252,Cluster-34894.96635,Cluster-34894.53949,Cluster-34894.61254,Cluster-34894.63617
GO:0008237	metallopeptidase activity	molecular_function	0.002299	0.13833	32	1654	531	49533	Cluster-22706.0,Cluster-34894.12093,Cluster-34894.13879,Cluster-34894.24883,Cluster-33476.2,Cluster-34894.52154,Cluster-34894.95237,Cluster-34894.76650,Cluster-34894.83943,Cluster-34894.83945,Cluster-34894.96484,Cluster-34894.59172,Cluster-34894.71321,Cluster-34894.7444,Cluster-34894.18072,Cluster-34894.83944,Cluster-34894.29157,Cluster-34894.93780,Cluster-34894.24884,Cluster-34894.73562,Cluster-…
GO:0006631	fatty acid metabolic process	biological_process	0.0023098	0.13833	17	1654	215	49533	Cluster-34894.51231,Cluster-34894.63617,Cluster-34894.92759,Cluster-34894.58719,Cluster-34894.17294,Cluster-34894.96635,Cluster-34894.61730,Cluster-34894.27841,Cluster-34894.42545,Cluster-34894.61254,Cluster-34894.76650,Cluster-34894.17291,Cluster-34894.33419,Cluster-34894.53949,Cluster-34894.61252,Cluster-34894.26738,Cluster-34894.13879
GO:0016053	organic acid biosynthetic process	biological_process	0.0023604	0.13833	34	1654	581	49533	Cluster-34894.14416,Cluster-34894.36035,Cluster-34894.46259,Cluster-34894.64717,Cluster-34894.13879,Cluster-34894.53949,Cluster-34894.61252,Cluster-34894.98548,Cluster-34894.41391,Cluster-34894.61254,Cluster-34894.76650,Cluster-16718.0,Cluster-34894.42545,Cluster-34894.95221,Cluster-34894.17294,Cluster-34894.8401,Cluster-34894.63209,Cluster-34894.92759,Cluster-34894.51231,Cluster-4270.2,Cluster-3…
GO:0046394	carboxylic acid biosynthetic process	biological_process	0.0023604	0.13833	34	1654	581	49533	Cluster-34894.104963,Cluster-34894.27841,Cluster-34894.61730,Cluster-35241.0,Cluster-34894.17719,Cluster-34894.63617,Cluster-34894.45376,Cluster-34894.96635,Cluster-34894.10810,Cluster-4270.2,Cluster-34894.6548,Cluster-34894.17291,Cluster-16758.1,Cluster-34894.26738,Cluster-34894.33419,Cluster-34894.95221,Cluster-34894.42545,Cluster-16718.0,Cluster-34894.51231,Cluster-34894.8401,Cluster-34894.172…
GO:0016818	hydrolase activity, acting on acid anhydrides, in phosphorus-containing anhydrides	molecular_function	0.0025402	0.147	104	1654	2239	49533	Cluster-34894.72787,Cluster-34894.78553,Cluster-34894.26752,Cluster-34894.92936,Cluster-34894.39312,Cluster-34894.52311,Cluster-34894.69939,Cluster-34894.93280,Cluster-34894.83955,Cluster-34894.15344,Cluster-34894.41360,Cluster-34894.84190,Cluster-34894.83060,Cluster-34894.54002,Cluster-34894.17744,Cluster-34894.99970,Cluster-34894.103691,Cluster-17437.0,Cluster-34894.68018,Cluster-34894.72209,Cl…
GO:0005576	extracellular region	cellular_component	0.0025666	0.147	133	1654	3053	49533	Cluster-34894.16182,Cluster-34894.8480,Cluster-34894.12685,Cluster-34894.109736,Cluster-34894.87268,Cluster-34894.87239,Cluster-34894.82976,Cluster-34894.46151,Cluster-34894.8479,Cluster-36750.0,Cluster-34894.67139,Cluster-34894.23317,Cluster-34894.41713,Cluster-34894.24883,Cluster-34300.0,Cluster-34894.46259,Cluster-34894.100382,Cluster-34894.15356,Cluster-34894.100797,Cluster-34894.8270,Cluster…
GO:0005506	iron ion binding	molecular_function	0.0026585	0.15055	26	1654	417	49533	Cluster-34894.51663,Cluster-34894.50485,Cluster-34894.58595,Cluster-34894.62363,Cluster-34894.65517,Cluster-34894.82747,Cluster-34894.41362,Cluster-34894.69838,Cluster-34894.61954,Cluster-34894.41361,Cluster-34894.33109,Cluster-34894.33419,Cluster-34894.83440,Cluster-34894.100671,Cluster-34894.59164,Cluster-34894.59915,Cluster-34894.59165,Cluster-34894.40318,Cluster-34894.99625,Cluster-34894.4136…
GO:0046912	transferase activity, transferring acyl groups, acyl groups converted into alkyl on transfer	molecular_function	0.0028545	0.15849	5	1654	29	49533	Cluster-34894.56266,Cluster-34894.59652,Cluster-34894.53949,Cluster-34894.55942,Cluster-34894.49080
GO:0005874	microtubule	cellular_component	0.0028617	0.15849	15	1654	193	49533	Cluster-34894.17296,Cluster-34894.66718,Cluster-34894.19751,Cluster-34894.16182,Cluster-34894.21651,Cluster-34894.78553,Cluster-34894.78551,Cluster-34894.96049,Cluster-34894.79586,Cluster-34894.105470,Cluster-34894.78560,Cluster-34894.64041,Cluster-34894.78905,Cluster-34894.79588,Cluster-34894.14312
GO:0016817	hydrolase activity, acting on acid anhydrides	molecular_function	0.0030403	0.16656	112	1654	2455	49533	Cluster-34894.68496,Cluster-34894.102323,Cluster-34894.64310,Cluster-34894.17296,Cluster-34894.69959,Cluster-34894.29510,Cluster-34894.81176,Cluster-34894.104310,Cluster-34894.84961,Cluster-34894.68407,Cluster-34894.54433,Cluster-34894.67888,Cluster-34894.108385,Cluster-34894.10101,Cluster-34894.76815,Cluster-34894.38003,Cluster-34894.72213,Cluster-34894.57788,Cluster-34894.60505,Cluster-34894.11…
GO:0008610	lipid biosynthetic process	biological_process	0.0032651	0.17695	34	1654	565	49533	Cluster-34894.84875,Cluster-34894.27841,Cluster-34894.61730,Cluster-34894.92197,Cluster-34894.59652,Cluster-34894.83329,Cluster-34894.63617,Cluster-34894.37859,Cluster-34894.96635,Cluster-34894.84881,Cluster-34894.83331,Cluster-34894.17291,Cluster-34894.33419,Cluster-34894.10279,Cluster-34894.26738,Cluster-34894.75854,Cluster-32090.1,Cluster-36520.1,Cluster-34894.42545,Cluster-34894.51231,Cluster…
GO:0000096	sulfur amino acid metabolic process	biological_process	0.0035806	0.19198	10	1654	104	49533	Cluster-34894.41391,Cluster-34894.29157,Cluster-34894.62363,Cluster-34894.101694,Cluster-34894.52963,Cluster-26286.0,Cluster-34894.58638,Cluster-34894.17719,Cluster-34894.38372,Cluster-34894.65517
GO:0004489	methylenetetrahydrofolate reductase (NAD(P)H) activity	molecular_function	0.0036674	0.19456	3	1654	9	49533	Cluster-34894.52963,Cluster-34894.58638,Cluster-34894.38372
GO:0004674	protein serine/threonine kinase activity	molecular_function	0.0037177	0.19518	30	1654	489	49533	Cluster-34894.27832,Cluster-15271.0,Cluster-34894.69855,Cluster-34894.31620,Cluster-34894.100795,Cluster-34894.72520,Cluster-18203.0,Cluster-34894.25219,Cluster-34894.15889,Cluster-34894.24432,Cluster-34894.75683,Cluster-34894.15887,Cluster-34894.16716,Cluster-19987.1,Cluster-34894.81865,Cluster-34894.54183,Cluster-34894.19109,Cluster-34894.90581,Cluster-34894.81805,Cluster-34894.53542,Cluster-34…
GO:0005905	coated pit	cellular_component	0.0044982	0.21799	5	1654	29	49533	Cluster-34894.13896,Cluster-34894.32549,Cluster-34894.53919,Cluster-29404.0,Cluster-34894.34704
GO:0012510	trans-Golgi network transport vesicle membrane	cellular_component	0.0044982	0.21799	5	1654	29	49533	Cluster-29404.0,Cluster-34894.34704,Cluster-34894.13896,Cluster-34894.32549,Cluster-34894.53919
GO:0030125	clathrin vesicle coat	cellular_component	0.0044982	0.21799	5	1654	29	49533	Cluster-34894.34704,Cluster-29404.0,Cluster-34894.53919,Cluster-34894.32549,Cluster-34894.13896
GO:0030130	clathrin coat of trans-Golgi network vesicle	cellular_component	0.0044982	0.21799	5	1654	29	49533	Cluster-34894.34704,Cluster-29404.0,Cluster-34894.13896,Cluster-34894.53919,Cluster-34894.32549
GO:0030132	clathrin coat of coated pit	cellular_component	0.0044982	0.21799	5	1654	29	49533	Cluster-34894.53919,Cluster-34894.32549,Cluster-34894.13896,Cluster-34894.34704,Cluster-29404.0
GO:0030136	clathrin-coated vesicle	cellular_component	0.0044982	0.21799	5	1654	29	49533	Cluster-29404.0,Cluster-34894.34704,Cluster-34894.13896,Cluster-34894.32549,Cluster-34894.53919
GO:0030140	trans-Golgi network transport vesicle	cellular_component	0.0044982	0.21799	5	1654	29	49533	Cluster-34894.34704,Cluster-29404.0,Cluster-34894.53919,Cluster-34894.32549,Cluster-34894.13896
GO:0030665	clathrin-coated vesicle membrane	cellular_component	0.0044982	0.21799	5	1654	29	49533	Cluster-34894.34704,Cluster-29404.0,Cluster-34894.13896,Cluster-34894.53919,Cluster-34894.32549
GO:0016278	lysine N-methyltransferase activity	molecular_function	0.0051201	0.23468	7	1654	58	49533	Cluster-34894.96657,Cluster-34894.7647,Cluster-34894.63399,Cluster-34894.7650,Cluster-34894.41191,Cluster-34894.99221,Cluster-34894.99970
GO:0016279	protein-lysine N-methyltransferase activity	molecular_function	0.0051201	0.23468	7	1654	58	49533	Cluster-34894.99970,Cluster-34894.99221,Cluster-34894.7650,Cluster-34894.41191,Cluster-34894.96657,Cluster-34894.7647,Cluster-34894.63399
GO:0018024	histone-lysine N-methyltransferase activity	molecular_function	0.0051201	0.23468	7	1654	58	49533	Cluster-34894.99970,Cluster-34894.99221,Cluster-34894.7650,Cluster-34894.41191,Cluster-34894.7647,Cluster-34894.96657,Cluster-34894.63399
GO:0042054	histone methyltransferase activity	molecular_function	0.0051201	0.23468	7	1654	58	49533	Cluster-34894.99970,Cluster-34894.99221,Cluster-34894.7650,Cluster-34894.41191,Cluster-34894.96657,Cluster-34894.7647,Cluster-34894.63399
GO:0008236	serine-type peptidase activity	molecular_function	0.0051221	0.23468	37	1654	675	49533	Cluster-34894.61671,Cluster-34894.3115,Cluster-34894.27174,Cluster-34894.65876,Cluster-34894.96785,Cluster-34894.56173,Cluster-34894.18135,Cluster-34894.71301,Cluster-34894.104525,Cluster-34894.38356,Cluster-34894.36758,Cluster-34894.109736,Cluster-34894.18156,Cluster-34894.96472,Cluster-34894.96312,Cluster-34894.44036,Cluster-34894.18092,Cluster-34894.53239,Cluster-34894.17789,Cluster-34894.5838…
GO:0017171	serine hydrolase activity	molecular_function	0.0051221	0.23468	37	1654	675	49533	Cluster-34894.37600,Cluster-34894.104963,Cluster-34894.84262,Cluster-34894.57486,Cluster-34894.89318,Cluster-34894.18154,Cluster-34894.14125,Cluster-34894.96309,Cluster-34894.104957,Cluster-34894.17289,Cluster-34894.17789,Cluster-34894.18155,Cluster-34894.50527,Cluster-34894.55056,Cluster-34894.58388,Cluster-34894.44339,Cluster-34894.60277,Cluster-34894.77692,Cluster-34894.22436,Cluster-34894.713…
GO:0004421	hydroxymethylglutaryl-CoA synthase activity	molecular_function	0.0053712	0.23631	3	1654	11	49533	Cluster-34894.56266,Cluster-34894.59652,Cluster-34894.53949
GO:0046950	cellular ketone body metabolic process	biological_process	0.0053712	0.23631	3	1654	11	49533	Cluster-34894.56266,Cluster-34894.59652,Cluster-34894.53949
GO:0006720	isoprenoid metabolic process	biological_process	0.0054485	0.23631	10	1654	105	49533	Cluster-34894.56266,Cluster-34894.92197,Cluster-34894.59652,Cluster-34894.58093,Cluster-34894.61254,Cluster-34894.37859,Cluster-34894.10279,Cluster-34894.61252,Cluster-34894.75854,Cluster-34894.53949
GO:0008299	isoprenoid biosynthetic process	biological_process	0.0054485	0.23631	10	1654	105	49533	Cluster-34894.59652,Cluster-34894.58093,Cluster-34894.92197,Cluster-34894.56266,Cluster-34894.61252,Cluster-34894.53949,Cluster-34894.75854,Cluster-34894.10279,Cluster-34894.37859,Cluster-34894.61254
GO:0008716	D-alanine-D-alanine ligase activity	molecular_function	0.0054858	0.23631	4	1654	20	49533	Cluster-34894.98975,Cluster-34894.17293,Cluster-34894.17292,Cluster-34894.86735
GO:0046144	D-alanine family amino acid metabolic process	biological_process	0.0054858	0.23631	4	1654	20	49533	Cluster-34894.17292,Cluster-34894.86735,Cluster-34894.98975,Cluster-34894.17293
GO:0046436	D-alanine metabolic process	biological_process	0.0054858	0.23631	4	1654	20	49533	Cluster-34894.17292,Cluster-34894.86735,Cluster-34894.98975,Cluster-34894.17293
GO:0016705	oxidoreductase activity, acting on paired donors, with incorporation or reduction of molecular oxygen	molecular_function	0.0059381	0.25363	26	1654	436	49533	Cluster-34894.50485,Cluster-34894.58595,Cluster-34894.10620,Cluster-34894.65259,Cluster-34894.37859,Cluster-34894.41361,Cluster-34894.61954,Cluster-34894.41362,Cluster-34894.69838,Cluster-34894.92197,Cluster-34894.82747,Cluster-34894.43346,Cluster-34894.59915,Cluster-34894.59164,Cluster-34894.61254,Cluster-34894.102709,Cluster-34894.61252,Cluster-34894.10279,Cluster-34894.100671,Cluster-33830.1,C…
GO:0018874	benzoate metabolic process	biological_process	0.0064008	0.26918	7	1654	58	49533	Cluster-34894.42545,Cluster-34894.61252,Cluster-34894.96635,Cluster-34894.61254,Cluster-34894.63617,Cluster-34894.27841,Cluster-34894.61730
GO:0070887	cellular response to chemical stimulus	biological_process	0.006425	0.26918	29	1654	490	49533	Cluster-34894.65312,Cluster-34894.14399,Cluster-34894.12685,Cluster-34894.49674,Cluster-34894.96945,Cluster-34894.17576,Cluster-34894.48533,Cluster-34894.36935,Cluster-34894.52963,Cluster-34894.14400,Cluster-34894.84142,Cluster-34894.46732,Cluster-34894.45429,Cluster-34894.45425,Cluster-34894.11431,Cluster-34894.69077,Cluster-34894.79362,Cluster-34894.14398,Cluster-34894.66553,Cluster-34894.58638…
GO:0002526	acute inflammatory response	biological_process	0.0065159	0.26918	2	1654	4	49533	Cluster-34894.33859,Cluster-10841.0
GO:0006953	acute-phase response	biological_process	0.0065159	0.26918	2	1654	4	49533	Cluster-10841.0,Cluster-34894.33859
GO:0003993	acid phosphatase activity	molecular_function	0.0067201	0.27314	18	1654	257	49533	Cluster-34894.14400,Cluster-34894.46732,Cluster-34894.14399,Cluster-34894.12685,Cluster-34894.49674,Cluster-34894.96945,Cluster-34894.17576,Cluster-34894.48533,Cluster-34894.14945,Cluster-34894.18076,Cluster-34894.87363,Cluster-34894.98267,Cluster-34894.61859,Cluster-34894.11431,Cluster-34894.69077,Cluster-34894.14398,Cluster-34894.66553,Cluster-34894.14402
GO:0019497	hexachlorocyclohexane metabolic process	biological_process	0.0067201	0.27314	18	1654	257	49533	Cluster-34894.98267,Cluster-34894.87363,Cluster-34894.61859,Cluster-34894.14945,Cluster-34894.18076,Cluster-34894.66553,Cluster-34894.14402,Cluster-34894.11431,Cluster-34894.69077,Cluster-34894.14398,Cluster-34894.46732,Cluster-34894.14400,Cluster-34894.49674,Cluster-34894.96945,Cluster-34894.48533,Cluster-34894.17576,Cluster-34894.14399,Cluster-34894.12685
GO:0004506	squalene monooxygenase activity	molecular_function	0.0070208	0.28308	3	1654	13	49533	Cluster-34894.61254,Cluster-34894.10279,Cluster-34894.61252
GO:0009271	phage shock	biological_process	0.0078771	0.3122	7	1654	72	49533	Cluster-34894.51497,Cluster-34894.56478,Cluster-34894.59587,Cluster-34894.58314,Cluster-34894.59586,Cluster-26774.0,Cluster-16764.0
GO:0098586	cellular response to virus	biological_process	0.0078771	0.3122	7	1654	72	49533	Cluster-16764.0,Cluster-26774.0,Cluster-34894.59586,Cluster-34894.58314,Cluster-34894.59587,Cluster-34894.56478,Cluster-34894.51497
GO:0004594	pantothenate kinase activity	molecular_function	0.007929	0.3122	3	1654	12	49533	Cluster-34894.63209,Cluster-34894.45376,Cluster-34894.64717
GO:0006508	proteolysis	biological_process	0.0080906	0.3161	88	1654	1904	49533	Cluster-34894.31051,Cluster-34894.55056,Cluster-34894.58388,Cluster-34894.32665,Cluster-34894.61808,Cluster-34894.24884,Cluster-34894.77692,Cluster-34894.74284,Cluster-34894.83440,Cluster-34894.101808,Cluster-34894.56264,Cluster-34894.99200,Cluster-34894.41361,Cluster-34894.89318,Cluster-34894.104963,Cluster-34894.84262,Cluster-34894.57486,Cluster-34894.67113,Cluster-34894.104730,Cluster-34894.12…
GO:0016877	ligase activity, forming carbon-sulfur bonds	molecular_function	0.0090809	0.35206	5	1654	36	49533	Cluster-34894.61252,Cluster-34894.55962,Cluster-34894.55961,Cluster-34894.104963,Cluster-34894.61254
GO:0015631	tubulin binding	molecular_function	0.0092166	0.35415	21	1654	353	49533	Cluster-34894.78560,Cluster-34894.105470,Cluster-34894.79588,Cluster-34894.78905,Cluster-34894.14312,Cluster-34894.21651,Cluster-34894.78553,Cluster-34894.78551,Cluster-34894.96049,Cluster-1082.0,Cluster-34894.72138,Cluster-26495.0,Cluster-34894.66718,Cluster-22213.1,Cluster-34894.79586,Cluster-34894.64041,Cluster-34894.68407,Cluster-34894.16182,Cluster-34894.19751,Cluster-34894.17296,Cluster-348…
GO:0008170	N-methyltransferase activity	molecular_function	0.0092782	0.35415	9	1654	97	49533	Cluster-34894.99221,Cluster-34894.99970,Cluster-34894.7647,Cluster-34894.42954,Cluster-34894.41191,Cluster-34894.74878,Cluster-34894.96657,Cluster-34894.63399,Cluster-34894.7650
GO:0007160	cell-matrix adhesion	biological_process	0.0093456	0.35415	4	1654	23	49533	Cluster-34894.33974,Cluster-34894.33977,Cluster-34894.33968,Cluster-34894.6752
GO:0045298	tubulin complex	cellular_component	0.009586	0.36055	21	1654	354	49533	Cluster-34894.16182,Cluster-34894.68407,Cluster-34894.79586,Cluster-22213.1,Cluster-34894.64041,Cluster-34894.15715,Cluster-34894.17296,Cluster-34894.19751,Cluster-34894.96049,Cluster-34894.78551,Cluster-1082.0,Cluster-34894.21651,Cluster-34894.78553,Cluster-34894.79588,Cluster-34894.78905,Cluster-34894.14312,Cluster-34894.78560,Cluster-34894.105470,Cluster-34894.66718,Cluster-26495.0,Cluster-348…
GO:0042196	chlorinated hydrocarbon metabolic process	biological_process	0.0099043	0.36704	18	1654	269	49533	Cluster-34894.14400,Cluster-34894.46732,Cluster-34894.14399,Cluster-34894.12685,Cluster-34894.48533,Cluster-34894.17576,Cluster-34894.96945,Cluster-34894.49674,Cluster-34894.18076,Cluster-34894.14945,Cluster-34894.87363,Cluster-34894.98267,Cluster-34894.61859,Cluster-34894.69077,Cluster-34894.14398,Cluster-34894.11431,Cluster-34894.14402,Cluster-34894.66553
GO:0042197	halogenated hydrocarbon metabolic process	biological_process	0.0099043	0.36704	18	1654	269	49533	Cluster-34894.12685,Cluster-34894.14399,Cluster-34894.49674,Cluster-34894.96945,Cluster-34894.17576,Cluster-34894.48533,Cluster-34894.14400,Cluster-34894.46732,Cluster-34894.11431,Cluster-34894.14398,Cluster-34894.69077,Cluster-34894.66553,Cluster-34894.14402,Cluster-34894.14945,Cluster-34894.18076,Cluster-34894.61859,Cluster-34894.87363,Cluster-34894.98267
GO:0046416	D-amino acid metabolic process	biological_process	0.010025	0.3688	4	1654	24	49533	Cluster-34894.17293,Cluster-34894.98975,Cluster-34894.17292,Cluster-34894.86735
GO:0015936	coenzyme A metabolic process	biological_process	0.010224	0.37341	5	1654	38	49533	Cluster-34894.64717,Cluster-34894.45376,Cluster-34894.56369,Cluster-34894.63209,Cluster-34894.36035
GO:0005488	binding	molecular_function	0.010564	0.38029	1000	1654	27815	49533	Cluster-34894.81977,Cluster-34894.15712,Cluster-34894.97614,Cluster-34894.21481,Cluster-34894.65259,Cluster-34894.14414,Cluster-34894.86205,Cluster-34894.29696,Cluster-30681.0,Cluster-34894.8270,Cluster-34894.20158,Cluster-34894.96585,Cluster-34894.72212,Cluster-34894.65597,Cluster-34894.14347,Cluster-34894.96652,Cluster-34894.19495,Cluster-34894.46248,Cluster-15271.0,Cluster-34894.49529,Cluster-…
GO:0008241	peptidyl-dipeptidase activity	molecular_function	0.010721	0.38135	3	1654	16	49533	Cluster-34894.83440,Cluster-34894.37587,Cluster-34894.59172
GO:0006771	riboflavin metabolic process	biological_process	0.01087	0.38135	18	1654	269	49533	Cluster-34894.12685,Cluster-34894.14399,Cluster-34894.49674,Cluster-34894.96945,Cluster-34894.48533,Cluster-34894.17576,Cluster-34894.14400,Cluster-34894.46732,Cluster-34894.11431,Cluster-34894.14398,Cluster-34894.69077,Cluster-34894.66553,Cluster-34894.14402,Cluster-34894.14945,Cluster-34894.18076,Cluster-34894.61859,Cluster-34894.87363,Cluster-34894.98267
GO:0042726	flavin-containing compound metabolic process	biological_process	0.01087	0.38135	18	1654	269	49533	Cluster-34894.66553,Cluster-34894.14402,Cluster-34894.11431,Cluster-34894.14398,Cluster-34894.69077,Cluster-34894.61859,Cluster-34894.98267,Cluster-34894.87363,Cluster-34894.14945,Cluster-34894.18076,Cluster-34894.49674,Cluster-34894.96945,Cluster-34894.48533,Cluster-34894.17576,Cluster-34894.12685,Cluster-34894.14399,Cluster-34894.46732,Cluster-34894.14400
GO:0015081	sodium ion transmembrane transporter activity	molecular_function	0.011008	0.38135	20	1654	338	49533	Cluster-34894.47234,Cluster-34894.49687,Cluster-34894.68013,Cluster-34894.21131,Cluster-34894.37600,Cluster-34894.43602,Cluster-34894.58281,Cluster-34894.59866,Cluster-34894.35111,Cluster-34894.51294,Cluster-34894.18447,Cluster-34894.15804,Cluster-34894.66729,Cluster-34894.48036,Cluster-34894.22411,Cluster-34894.55621,Cluster-34894.53033,Cluster-34894.95734,Cluster-34894.66806,Cluster-34894.55066
GO:0006084	acetyl-CoA metabolic process	biological_process	0.01104	0.38135	4	1654	24	49533	Cluster-34894.59652,Cluster-34894.53949,Cluster-34894.74877,Cluster-34894.56266
GO:0030975	thiamine binding	molecular_function	0.011047	0.38135	3	1654	15	49533	Cluster-34894.19108,Cluster-34894.76990,Cluster-34894.72801
GO:0033865	nucleoside bisphosphate metabolic process	biological_process	0.011577	0.3916	5	1654	39	49533	Cluster-34894.36035,Cluster-34894.63209,Cluster-34894.56369,Cluster-34894.45376,Cluster-34894.64717
GO:0033875	ribonucleoside bisphosphate metabolic process	biological_process	0.011577	0.3916	5	1654	39	49533	Cluster-34894.45376,Cluster-34894.64717,Cluster-34894.63209,Cluster-34894.36035,Cluster-34894.56369
GO:0034032	purine nucleoside bisphosphate metabolic process	biological_process	0.011577	0.3916	5	1654	39	49533	Cluster-34894.56369,Cluster-34894.36035,Cluster-34894.63209,Cluster-34894.64717,Cluster-34894.45376
GO:0007126	meiotic nuclear division	biological_process	0.01212	0.40235	7	1654	69	49533	Cluster-34894.60277,Cluster-34894.72501,Cluster-34894.76815,Cluster-34894.28931,Cluster-34894.15714,Cluster-34894.25747,Cluster-34894.35213
GO:1903046	meiotic cell cycle process	biological_process	0.01212	0.40235	7	1654	69	49533	Cluster-34894.72501,Cluster-34894.60277,Cluster-34894.25747,Cluster-34894.15714,Cluster-34894.35213,Cluster-34894.28931,Cluster-34894.76815
GO:0004315	3-oxoacyl-[acyl-carrier-protein] synthase activity	molecular_function	0.012134	0.40235	3	1654	13	49533	Cluster-34894.51231,Cluster-34894.53949,Cluster-34894.92759
GO:0007127	meiosis I	biological_process	0.0124	0.40849	6	1654	54	49533	Cluster-34894.60277,Cluster-34894.72501,Cluster-34894.15714,Cluster-34894.35213,Cluster-34894.25747,Cluster-34894.28931
GO:0031589	cell-substrate adhesion	biological_process	0.012818	0.4193	4	1654	26	49533	Cluster-34894.6752,Cluster-34894.33968,Cluster-34894.33974,Cluster-34894.33977
GO:0017172	cysteine dioxygenase activity	molecular_function	0.012978	0.4193	3	1654	15	49533	Cluster-34894.65517,Cluster-26286.0,Cluster-34894.62363
GO:0046439	L-cysteine metabolic process	biological_process	0.012978	0.4193	3	1654	15	49533	Cluster-34894.65517,Cluster-34894.62363,Cluster-26286.0
GO:0006535	cysteine biosynthetic process from serine	biological_process	0.013587	0.42799	2	1654	6	49533	Cluster-34894.41391,Cluster-34894.17719
GO:0009001	serine O-acetyltransferase activity	molecular_function	0.013587	0.42799	2	1654	6	49533	Cluster-34894.17719,Cluster-34894.41391
GO:0016412	serine O-acyltransferase activity	molecular_function	0.013587	0.42799	2	1654	6	49533	Cluster-34894.41391,Cluster-34894.17719
GO:0019344	cysteine biosynthetic process	biological_process	0.013587	0.42799	2	1654	6	49533	Cluster-34894.17719,Cluster-34894.41391
GO:0006766	vitamin metabolic process	biological_process	0.014076	0.43574	31	1654	567	49533	Cluster-34894.48533,Cluster-34894.17576,Cluster-16718.0,Cluster-34894.49674,Cluster-34894.96945,Cluster-34894.14399,Cluster-34894.12685,Cluster-34894.95221,Cluster-34894.104963,Cluster-34894.10810,Cluster-34894.63209,Cluster-34894.46732,Cluster-34894.8401,Cluster-34894.62299,Cluster-34894.14400,Cluster-34894.45376,Cluster-34894.36035,Cluster-34894.14402,Cluster-34894.66553,Cluster-34894.69077,Clu…
GO:0006767	water-soluble vitamin metabolic process	biological_process	0.014076	0.43574	31	1654	567	49533	Cluster-34894.14400,Cluster-34894.62299,Cluster-34894.45376,Cluster-34894.63209,Cluster-34894.10810,Cluster-34894.8401,Cluster-34894.46732,Cluster-34894.12685,Cluster-34894.95221,Cluster-34894.14399,Cluster-34894.104963,Cluster-16718.0,Cluster-34894.48533,Cluster-34894.17576,Cluster-34894.49674,Cluster-34894.96945,Cluster-34894.18076,Cluster-34894.61254,Cluster-34894.14945,Cluster-34894.61859,Clu…
GO:0009229	thiamine diphosphate biosynthetic process	biological_process	0.014179	0.43574	3	1654	16	49533	Cluster-34894.76990,Cluster-34894.19108,Cluster-34894.72801
GO:0042357	thiamine diphosphate metabolic process	biological_process	0.014179	0.43574	3	1654	16	49533	Cluster-34894.72801,Cluster-34894.76990,Cluster-34894.19108
GO:0019229	regulation of vasoconstriction	biological_process	0.014676	0.4456	5	1654	41	49533	Cluster-34894.61954,Cluster-34894.8481,Cluster-34894.8480,Cluster-34894.8479,Cluster-34894.59783
GO:0042310	vasoconstriction	biological_process	0.014676	0.4456	5	1654	41	49533	Cluster-34894.59783,Cluster-34894.8481,Cluster-34894.8480,Cluster-34894.8479,Cluster-34894.61954
GO:0003933	GTP cyclohydrolase activity	molecular_function	0.015012	0.45306	3	1654	15	49533	Cluster-34894.99918,Cluster-34894.97414,Cluster-34894.36549
GO:0008641	small protein activating enzyme activity	molecular_function	0.015383	0.4615	4	1654	26	49533	Cluster-34894.61252,Cluster-34894.55962,Cluster-34894.55961,Cluster-34894.61254
GO:0022804	active transmembrane transporter activity	molecular_function	0.016818	0.50155	29	1654	538	49533	Cluster-34894.55066,Cluster-34894.95734,Cluster-34894.22411,Cluster-34894.61525,Cluster-34894.101377,Cluster-34894.48036,Cluster-34894.66729,Cluster-34894.85012,Cluster-34894.78905,Cluster-34894.53033,Cluster-32401.0,Cluster-34894.55621,Cluster-34894.48742,Cluster-34894.7011,Cluster-34894.58281,Cluster-34894.69101,Cluster-34894.15804,Cluster-34894.18447,Cluster-34894.51294,Cluster-34894.70759,Clu…
GO:0016833	oxo-acid-lyase activity	molecular_function	0.016933	0.50202	3	1654	17	49533	Cluster-34894.71967,Cluster-34894.87619,Cluster-34894.21131
GO:0016646	oxidoreductase activity, acting on the CH-NH group of donors, NAD or NADP as acceptor	molecular_function	0.017228	0.50777	6	1654	58	49533	Cluster-34894.38372,Cluster-34894.58638,Cluster-16758.1,Cluster-34894.52963,Cluster-34894.22318,Cluster-34894.61730
GO:0006760	folic acid-containing compound metabolic process	biological_process	0.01788	0.52391	10	1654	130	49533	Cluster-34894.52963,Cluster-34894.10810,Cluster-34894.98548,Cluster-16758.1,Cluster-34894.8401,Cluster-34894.95221,Cluster-34894.61730,Cluster-34894.38372,Cluster-16718.0,Cluster-34894.58638
GO:0046653	tetrahydrofolate metabolic process	biological_process	0.018807	0.54791	3	1654	15	49533	Cluster-34894.38372,Cluster-34894.58638,Cluster-34894.52963
GO:0015937	coenzyme A biosynthetic process	biological_process	0.019626	0.55885	4	1654	30	49533	Cluster-34894.63209,Cluster-34894.36035,Cluster-34894.64717,Cluster-34894.45376
GO:0033866	nucleoside bisphosphate biosynthetic process	biological_process	0.019626	0.55885	4	1654	30	49533	Cluster-34894.45376,Cluster-34894.64717,Cluster-34894.36035,Cluster-34894.63209
GO:0034030	ribonucleoside bisphosphate biosynthetic process	biological_process	0.019626	0.55885	4	1654	30	49533	Cluster-34894.63209,Cluster-34894.36035,Cluster-34894.64717,Cluster-34894.45376
GO:0034033	purine nucleoside bisphosphate biosynthetic process	biological_process	0.019626	0.55885	4	1654	30	49533	Cluster-34894.63209,Cluster-34894.36035,Cluster-34894.45376,Cluster-34894.64717
GO:0005520	insulin-like growth factor binding	molecular_function	0.020433	0.57213	5	1654	40	49533	Cluster-34894.66229,Cluster-34894.89318,Cluster-34894.57548,Cluster-36750.0,Cluster-34894.14125
GO:0016942	insulin-like growth factor binding protein complex	cellular_component	0.020433	0.57213	5	1654	40	49533	Cluster-34894.66229,Cluster-34894.14125,Cluster-36750.0,Cluster-34894.57548,Cluster-34894.89318
GO:0036454	growth factor complex	cellular_component	0.020433	0.57213	5	1654	40	49533	Cluster-36750.0,Cluster-34894.14125,Cluster-34894.89318,Cluster-34894.57548,Cluster-34894.66229
GO:0004175	endopeptidase activity	molecular_function	0.020895	0.58183	73	1654	1629	49533	Cluster-34894.45002,Cluster-34894.37600,Cluster-34894.76305,Cluster-34894.18154,Cluster-34894.14125,Cluster-34894.96309,Cluster-34894.69856,Cluster-33505.0,Cluster-34894.17289,Cluster-34894.104957,Cluster-34894.93780,Cluster-34894.17789,Cluster-34894.43803,Cluster-34894.18155,Cluster-34894.50527,Cluster-34894.39312,Cluster-34894.60277,Cluster-34894.44339,Cluster-34894.73562,Cluster-34894.22436,Cl…
GO:0003848	2-amino-4-hydroxy-6-hydroxymethyldihydropteridine diphosphokinase activity	molecular_function	0.021414	0.58819	2	1654	6	49533	Cluster-34894.10810,Cluster-34894.98548
GO:0004476	mannose-6-phosphate isomerase activity	molecular_function	0.02148	0.58819	2	1654	6	49533	Cluster-34894.97051,Cluster-34894.67287
GO:0006805	xenobiotic metabolic process	biological_process	0.021763	0.58819	18	1654	293	49533	Cluster-34894.46732,Cluster-34894.14400,Cluster-34894.48533,Cluster-34894.17576,Cluster-34894.96945,Cluster-34894.49674,Cluster-34894.14399,Cluster-34894.12685,Cluster-34894.87363,Cluster-34894.98267,Cluster-34894.61859,Cluster-34894.18076,Cluster-34894.14945,Cluster-34894.14402,Cluster-34894.66553,Cluster-34894.69077,Cluster-34894.14398,Cluster-34894.11431
GO:0009410	response to xenobiotic stimulus	biological_process	0.021763	0.58819	18	1654	293	49533	Cluster-34894.14400,Cluster-34894.46732,Cluster-34894.14399,Cluster-34894.12685,Cluster-34894.96945,Cluster-34894.49674,Cluster-34894.48533,Cluster-34894.17576,Cluster-34894.14945,Cluster-34894.18076,Cluster-34894.87363,Cluster-34894.98267,Cluster-34894.61859,Cluster-34894.11431,Cluster-34894.69077,Cluster-34894.14398,Cluster-34894.66553,Cluster-34894.14402
GO:0071466	cellular response to xenobiotic stimulus	biological_process	0.021763	0.58819	18	1654	293	49533	Cluster-34894.14400,Cluster-34894.46732,Cluster-34894.12685,Cluster-34894.14399,Cluster-34894.17576,Cluster-34894.48533,Cluster-34894.96945,Cluster-34894.49674,Cluster-34894.18076,Cluster-34894.14945,Cluster-34894.61859,Cluster-34894.98267,Cluster-34894.87363,Cluster-34894.14398,Cluster-34894.69077,Cluster-34894.11431,Cluster-34894.14402,Cluster-34894.66553
GO:0098609	cell-cell adhesion	biological_process	0.021824	0.58819	13	1654	215	49533	Cluster-15355.1,Cluster-34894.14435,Cluster-34368.0,Cluster-34894.16252,Cluster-34894.44833,Cluster-34894.88457,Cluster-34894.11573,Cluster-34894.104639,Cluster-34894.88458,Cluster-34894.88456,Cluster-34894.13697,Cluster-34894.52502,Cluster-34894.15596
GO:0071949	FAD binding	molecular_function	0.023638	0.63369	6	1654	57	49533	Cluster-34894.61254,Cluster-34894.54219,Cluster-34894.37859,Cluster-34894.92197,Cluster-34894.77308,Cluster-34894.61252
GO:0004609	phosphatidylserine decarboxylase activity	molecular_function	0.023813	0.63501	2	1654	6	49533	Cluster-34894.83329,Cluster-34894.83331
GO:0001558	regulation of cell growth	biological_process	0.024014	0.637	5	1654	43	49533	Cluster-34894.66229,Cluster-34894.89318,Cluster-34894.57548,Cluster-34894.14125,Cluster-36750.0
GO:0004672	protein kinase activity	molecular_function	0.024551	0.64253	77	1654	1702	49533	Cluster-34894.21077,Cluster-34894.25219,Cluster-34894.76226,Cluster-34894.86322,Cluster-19987.1,Cluster-34345.0,Cluster-34894.17432,Cluster-34894.27829,Cluster-34894.16712,Cluster-34894.11711,Cluster-34894.53542,Cluster-34894.81805,Cluster-34894.19109,Cluster-34894.48260,Cluster-34894.78970,Cluster-34894.104963,Cluster-34894.45762,Cluster-34894.81215,Cluster-34894.14995,Cluster-34894.97670,Cluste…
GO:0008287	protein serine/threonine phosphatase complex	cellular_component	0.024867	0.64253	4	1654	32	49533	Cluster-34894.54542,Cluster-34894.60188,Cluster-34894.60187,Cluster-34894.49745
GO:1903293	phosphatase complex	cellular_component	0.024867	0.64253	4	1654	32	49533	Cluster-34894.60188,Cluster-34894.54542,Cluster-34894.60187,Cluster-34894.49745
GO:0003980	UDP-glucose:glycoprotein glucosyltransferase activity	molecular_function	0.025067	0.64253	2	1654	7	49533	Cluster-34894.13455,Cluster-34894.13456
GO:0009521	photosystem	cellular_component	0.025281	0.64253	17	1654	299	49533	Cluster-34894.81166,Cluster-34894.63859,Cluster-34894.41592,Cluster-10748.0,Cluster-34894.26738,Cluster-34894.77127,Cluster-34894.54754,Cluster-34894.73870,Cluster-34894.70050,Cluster-34894.14910,Cluster-34894.68939,Cluster-34894.87268,Cluster-34894.90148,Cluster-34894.46732,Cluster-34894.35505,Cluster-34894.50449,Cluster-34894.55013
GO:0006768	biotin metabolic process	biological_process	0.025591	0.64253	1	1654	1	49533	Cluster-34894.104963
GO:0009102	biotin biosynthetic process	biological_process	0.025591	0.64253	1	1654	1	49533	Cluster-34894.104963
GO:0042410	6-carboxyhexanoate-CoA ligase activity	molecular_function	0.025591	0.64253	1	1654	1	49533	Cluster-34894.104963
GO:0098589	membrane region	cellular_component	0.02586	0.64253	5	1654	48	49533	Cluster-29404.0,Cluster-34894.34704,Cluster-34894.32549,Cluster-34894.53919,Cluster-34894.13896
GO:0006636	unsaturated fatty acid biosynthetic process	biological_process	0.02588	0.64253	3	1654	17	49533	Cluster-34894.76650,Cluster-34894.13879,Cluster-34894.26738
GO:0019370	leukotriene biosynthetic process	biological_process	0.02588	0.64253	3	1654	17	49533	Cluster-34894.26738,Cluster-34894.13879,Cluster-34894.76650
GO:0046456	icosanoid biosynthetic process	biological_process	0.02588	0.64253	3	1654	17	49533	Cluster-34894.26738,Cluster-34894.13879,Cluster-34894.76650
GO:1901570	fatty acid derivative biosynthetic process	biological_process	0.02588	0.64253	3	1654	17	49533	Cluster-34894.26738,Cluster-34894.13879,Cluster-34894.76650
GO:0019530	taurine metabolic process	biological_process	0.026373	0.65156	4	1654	32	49533	Cluster-34894.65517,Cluster-34894.58719,Cluster-26286.0,Cluster-34894.62363
GO:0051321	meiotic cell cycle	biological_process	0.026527	0.65218	7	1654	80	49533	Cluster-34894.76815,Cluster-34894.28931,Cluster-34894.15714,Cluster-34894.35213,Cluster-34894.25747,Cluster-34894.60277,Cluster-34894.72501
GO:0044272	sulfur compound biosynthetic process	biological_process	0.027252	0.66119	9	1654	120	49533	Cluster-34894.104963,Cluster-34894.1649,Cluster-34894.17719,Cluster-34894.76990,Cluster-34894.19108,Cluster-34894.72801,Cluster-34894.29157,Cluster-34894.41391,Cluster-34894.22436
GO:0042537	benzene-containing compound metabolic process	biological_process	0.027328	0.66119	7	1654	77	49533	Cluster-34894.96635,Cluster-34894.61252,Cluster-34894.42545,Cluster-34894.27841,Cluster-34894.61730,Cluster-34894.63617,Cluster-34894.61254
GO:0019748	secondary metabolic process	biological_process	0.027419	0.66119	8	1654	102	49533	Cluster-34894.30879,Cluster-34894.89318,Cluster-8208.0,Cluster-34894.47835,Cluster-34894.50952,Cluster-34894.79586,Cluster-34894.37401,Cluster-34894.102233
GO:0008289	lipid binding	molecular_function	0.027448	0.66119	30	1654	576	49533	Cluster-34894.64571,Cluster-34894.57490,Cluster-34894.95221,Cluster-34894.73942,Cluster-34894.99676,Cluster-34894.56301,Cluster-34894.12139,Cluster-34894.29868,Cluster-34894.73678,Cluster-34894.76188,Cluster-34894.58326,Cluster-34894.37790,Cluster-34894.38069,Cluster-34894.74164,Cluster-34894.90646,Cluster-34894.36582,Cluster-34894.70713,Cluster-34894.57489,Cluster-34894.60834,Cluster-34894.46259…
GO:0098805	whole membrane	cellular_component	0.02755	0.66119	33	1654	710	49533	Cluster-34894.99970,Cluster-34894.68037,Cluster-34894.13896,Cluster-34894.81805,Cluster-34894.70529,Cluster-34894.40744,Cluster-34894.72073,Cluster-34894.33419,Cluster-29404.0,Cluster-34894.32549,Cluster-34894.79358,Cluster-34894.57008,Cluster-34894.47996,Cluster-34894.83060,Cluster-34894.93780,Cluster-34894.29410,Cluster-34894.26768,Cluster-34894.31028,Cluster-34894.33082,Cluster-34894.95221,Clu…
GO:0003824	catalytic activity	molecular_function	0.027727	0.6623	660	1654	17950	49533	Cluster-34894.15651,Cluster-34894.35111,Cluster-34894.7650,Cluster-34894.83945,Cluster-19845.0,Cluster-34894.19751,Cluster-34894.7571,Cluster-34894.56122,Cluster-34894.58719,Cluster-34894.71321,Cluster-34894.59983,Cluster-34894.5705,Cluster-34894.32862,Cluster-34894.100616,Cluster-34894.59165,Cluster-34894.77888,Cluster-34894.78560,Cluster-34894.50918,Cluster-34894.56173,Cluster-33476.2,Cluster-3…
GO:0016049	cell growth	biological_process	0.027911	0.66353	5	1654	45	49533	Cluster-36750.0,Cluster-34894.14125,Cluster-34894.57548,Cluster-34894.89318,Cluster-34894.66229
GO:0050797	thymidylate synthase (FAD) activity	molecular_function	0.028209	0.66711	1	1654	1	49533	Cluster-34894.17808
GO:0009725	response to hormone	biological_process	0.028326	0.66711	12	1654	179	49533	Cluster-34894.45429,Cluster-34894.84142,Cluster-34894.52963,Cluster-34894.60220,Cluster-34894.36935,Cluster-34894.81065,Cluster-34894.59904,Cluster-34894.58638,Cluster-34894.73042,Cluster-34894.79362,Cluster-34894.65312,Cluster-34894.45425
GO:0002949	tRNA threonylcarbamoyladenosine modification	biological_process	0.030221	0.70339	10	1654	139	49533	Cluster-34894.15343,Cluster-34894.81176,Cluster-34894.15344,Cluster-34894.29132,Cluster-34894.95237,Cluster-34894.96990,Cluster-34894.15653,Cluster-26628.0,Cluster-34894.92978,Cluster-34894.26752
GO:0070525	tRNA threonylcarbamoyladenosine metabolic process	biological_process	0.030221	0.70339	10	1654	139	49533	Cluster-34894.29132,Cluster-34894.15344,Cluster-34894.81176,Cluster-34894.15343,Cluster-34894.26752,Cluster-26628.0,Cluster-34894.92978,Cluster-34894.15653,Cluster-34894.96990,Cluster-34894.95237
GO:0007131	reciprocal meiotic recombination	biological_process	0.030424	0.70339	4	1654	34	49533	Cluster-34894.72501,Cluster-34894.60277,Cluster-34894.28931,Cluster-34894.25747
GO:0035825	reciprocal DNA recombination	biological_process	0.030424	0.70339	4	1654	34	49533	Cluster-34894.25747,Cluster-34894.28931,Cluster-34894.72501,Cluster-34894.60277
GO:0016774	phosphotransferase activity, carboxyl group as acceptor	molecular_function	0.031188	0.71775	2	1654	8	49533	Cluster-34894.17808,Cluster-34894.14716
GO:0019838	growth factor binding	molecular_function	0.031814	0.72692	5	1654	45	49533	Cluster-34894.89318,Cluster-34894.57548,Cluster-34894.14125,Cluster-36750.0,Cluster-34894.66229
GO:0006783	heme biosynthetic process	biological_process	0.031875	0.72692	6	1654	65	49533	Cluster-34894.82976,Cluster-34894.61252,Cluster-34894.77308,Cluster-34894.92197,Cluster-34894.101694,Cluster-34894.61254
GO:0009404	toxin metabolic process	biological_process	0.033927	0.77023	6	1654	70	49533	Cluster-34894.37401,Cluster-34894.89318,Cluster-34894.30879,Cluster-34894.50952,Cluster-34894.47835,Cluster-34894.79586
GO:0042221	response to chemical	biological_process	0.034547	0.78079	53	1654	1184	49533	Cluster-34894.17576,Cluster-34894.48533,Cluster-34894.49674,Cluster-34894.96945,Cluster-34894.14399,Cluster-34894.65312,Cluster-34894.62000,Cluster-34894.36935,Cluster-34894.81065,Cluster-34894.66553,Cluster-34894.59904,Cluster-34894.58638,Cluster-34894.14398,Cluster-34894.11431,Cluster-34894.36671,Cluster-34894.98267,Cluster-34894.87363,Cluster-34894.61859,Cluster-34894.16163,Cluster-34894.60277…
GO:0040008	regulation of growth	biological_process	0.035242	0.78744	5	1654	48	49533	Cluster-36750.0,Cluster-34894.14125,Cluster-34894.89318,Cluster-34894.57548,Cluster-34894.66229
GO:0019915	lipid storage	biological_process	0.035439	0.78744	3	1654	20	49533	Cluster-34894.53590,Cluster-34894.12115,Cluster-7665.0
GO:0005798	Golgi-associated vesicle	cellular_component	0.035466	0.78744	5	1654	51	49533	Cluster-29404.0,Cluster-34894.34704,Cluster-34894.13896,Cluster-34894.32549,Cluster-34894.53919
GO:0030660	Golgi-associated vesicle membrane	cellular_component	0.035466	0.78744	5	1654	51	49533	Cluster-34894.53919,Cluster-34894.32549,Cluster-34894.13896,Cluster-34894.34704,Cluster-29404.0
GO:0008158	hedgehog receptor activity	molecular_function	0.035825	0.79193	4	1654	33	49533	Cluster-34894.55639,Cluster-34894.58822,Cluster-34894.74896,Cluster-34894.56367
GO:0007156	homophilic cell adhesion via plasma membrane adhesion molecules	biological_process	0.036157	0.79533	12	1654	208	49533	Cluster-34894.52502,Cluster-34894.15596,Cluster-34894.13697,Cluster-34894.88456,Cluster-34894.88458,Cluster-34894.88457,Cluster-34894.11573,Cluster-34894.104639,Cluster-34894.14435,Cluster-34894.44833,Cluster-34368.0,Cluster-15355.1
GO:0000446	nucleoplasmic THO complex	cellular_component	0.036496	0.79533	2	1654	11	49533	Cluster-34894.69437,Cluster-34894.91000
GO:0005351	sugar:proton symporter activity	molecular_function	0.037005	0.79533	3	1654	21	49533	Cluster-34894.101377,Cluster-34894.85012,Cluster-32401.0
GO:0005402	cation:sugar symporter activity	molecular_function	0.037005	0.79533	3	1654	21	49533	Cluster-34894.85012,Cluster-34894.101377,Cluster-32401.0
GO:0015295	solute:proton symporter activity	molecular_function	0.037005	0.79533	3	1654	21	49533	Cluster-34894.101377,Cluster-34894.85012,Cluster-32401.0
GO:0042558	pteridine-containing compound metabolic process	biological_process	0.037251	0.79533	10	1654	147	49533	Cluster-34894.38372,Cluster-16718.0,Cluster-34894.58638,Cluster-34894.95221,Cluster-34894.61730,Cluster-34894.10810,Cluster-34894.98548,Cluster-34894.8401,Cluster-16758.1,Cluster-34894.52963
GO:0030193	regulation of blood coagulation	biological_process	0.037715	0.79533	2	1654	9	49533	Cluster-34894.60081,Cluster-34894.22770
GO:0050818	regulation of coagulation	biological_process	0.037715	0.79533	2	1654	9	49533	Cluster-34894.60081,Cluster-34894.22770
GO:0061041	regulation of wound healing	biological_process	0.037715	0.79533	2	1654	9	49533	Cluster-34894.60081,Cluster-34894.22770
GO:1900046	regulation of hemostasis	biological_process	0.037715	0.79533	2	1654	9	49533	Cluster-34894.60081,Cluster-34894.22770
GO:1903034	regulation of response to wounding	biological_process	0.037715	0.79533	2	1654	9	49533	Cluster-34894.22770,Cluster-34894.60081
GO:0071107	response to parathyroid hormone	biological_process	0.038034	0.79872	2	1654	9	49533	Cluster-34894.73042,Cluster-34894.81065
GO:0006690	icosanoid metabolic process	biological_process	0.038844	0.80236	4	1654	34	49533	Cluster-34894.58719,Cluster-34894.26738,Cluster-34894.76650,Cluster-34894.13879
GO:0006691	leukotriene metabolic process	biological_process	0.038844	0.80236	4	1654	34	49533	Cluster-34894.58719,Cluster-34894.26738,Cluster-34894.13879,Cluster-34894.76650
GO:0033559	unsaturated fatty acid metabolic process	biological_process	0.038844	0.80236	4	1654	34	49533	Cluster-34894.76650,Cluster-34894.13879,Cluster-34894.58719,Cluster-34894.26738
GO:1901568	fatty acid derivative metabolic process	biological_process	0.038844	0.80236	4	1654	34	49533	Cluster-34894.26738,Cluster-34894.58719,Cluster-34894.13879,Cluster-34894.76650
GO:0006637	acyl-CoA metabolic process	biological_process	0.041257	0.84384	4	1654	37	49533	Cluster-34894.53949,Cluster-34894.59652,Cluster-34894.74877,Cluster-34894.56266
GO:0035383	thioester metabolic process	biological_process	0.041257	0.84384	4	1654	37	49533	Cluster-34894.56266,Cluster-34894.53949,Cluster-34894.59652,Cluster-34894.74877
GO:0098742	cell-cell adhesion via plasma-membrane adhesion molecules	biological_process	0.041815	0.84384	12	1654	212	49533	Cluster-34894.104639,Cluster-34894.11573,Cluster-34894.88457,Cluster-15355.1,Cluster-34368.0,Cluster-34894.44833,Cluster-34894.14435,Cluster-34894.15596,Cluster-34894.52502,Cluster-34894.88458,Cluster-34894.13697,Cluster-34894.88456
GO:0004312	fatty acid synthase activity	molecular_function	0.041817	0.84384	3	1654	21	49533	Cluster-34894.92759,Cluster-34894.53949,Cluster-34894.51231
GO:0005835	fatty acid synthase complex	cellular_component	0.041817	0.84384	3	1654	21	49533	Cluster-34894.92759,Cluster-34894.53949,Cluster-34894.51231
GO:0000062	fatty-acyl-CoA binding	molecular_function	0.041857	0.84384	4	1654	33	49533	Cluster-34894.33579,Cluster-34894.62019,Cluster-34894.8057,Cluster-34894.104028
GO:0042262	DNA protection	biological_process	0.042672	0.84752	4	1654	37	49533	Cluster-34894.82976,Cluster-34894.46259,Cluster-34894.60834,Cluster-34894.95221
GO:0044163	host cytoskeleton	cellular_component	0.04288	0.84752	2	1654	11	49533	Cluster-34894.98268,Cluster-34894.61988
GO:0075519	microtubule-dependent intracellular transport of viral material	biological_process	0.04288	0.84752	2	1654	11	49533	Cluster-34894.61988,Cluster-34894.98268
GO:0075521	microtubule-dependent intracellular transport of viral material towards nucleus	biological_process	0.04288	0.84752	2	1654	11	49533	Cluster-34894.98268,Cluster-34894.61988
GO:0075606	transport of viral material towards nucleus	biological_process	0.04288	0.84752	2	1654	11	49533	Cluster-34894.98268,Cluster-34894.61988
GO:0006575	cellular modified amino acid metabolic process	biological_process	0.043494	0.85628	22	1654	408	49533	Cluster-34894.45376,Cluster-34894.29157,Cluster-34894.52963,Cluster-34894.8401,Cluster-34894.58719,Cluster-34894.41191,Cluster-34894.63209,Cluster-34894.10810,Cluster-34894.61730,Cluster-34894.95221,Cluster-16718.0,Cluster-34894.81829,Cluster-34894.75349,Cluster-34894.61254,Cluster-16758.1,Cluster-34894.98548,Cluster-34894.61252,Cluster-34894.22436,Cluster-34894.64717,Cluster-34894.58638,Cluster-…
GO:0003013	circulatory system process	biological_process	0.044643	0.85878	5	1654	55	49533	Cluster-34894.61954,Cluster-34894.59783,Cluster-34894.8480,Cluster-34894.8479,Cluster-34894.8481
GO:0003018	vascular process in circulatory system	biological_process	0.044643	0.85878	5	1654	55	49533	Cluster-34894.61954,Cluster-34894.59783,Cluster-34894.8480,Cluster-34894.8481,Cluster-34894.8479
GO:0008015	blood circulation	biological_process	0.044643	0.85878	5	1654	55	49533	Cluster-34894.61954,Cluster-34894.8479,Cluster-34894.8480,Cluster-34894.8481,Cluster-34894.59783
GO:0035150	regulation of tube size	biological_process	0.044643	0.85878	5	1654	55	49533	Cluster-34894.59783,Cluster-34894.8481,Cluster-34894.8480,Cluster-34894.8479,Cluster-34894.61954
GO:0050880	regulation of blood vessel size	biological_process	0.044643	0.85878	5	1654	55	49533	Cluster-34894.59783,Cluster-34894.8480,Cluster-34894.8479,Cluster-34894.8481,Cluster-34894.61954
GO:1903522	regulation of blood circulation	biological_process	0.044643	0.85878	5	1654	55	49533	Cluster-34894.8479,Cluster-34894.8480,Cluster-34894.8481,Cluster-34894.59783,Cluster-34894.61954
GO:0044283	small molecule biosynthetic process	biological_process	0.045018	0.8627	40	1654	871	49533	Cluster-34894.64717,Cluster-34894.58364,Cluster-34894.13879,Cluster-34894.14416,Cluster-34894.46259,Cluster-34894.36035,Cluster-34894.41391,Cluster-34894.61254,Cluster-34894.76650,Cluster-34894.53949,Cluster-34894.61252,Cluster-34894.98548,Cluster-34894.48364,Cluster-34894.95221,Cluster-16718.0,Cluster-34894.42545,Cluster-34894.51231,Cluster-34894.17294,Cluster-34894.21131,Cluster-34894.8401,Clus…
GO:0016628	oxidoreductase activity, acting on the CH-CH group of donors, NAD or NADP as acceptor	molecular_function	0.047379	0.90451	5	1654	55	49533	Cluster-34894.92197,Cluster-34894.77308,Cluster-34894.61252,Cluster-34894.61254,Cluster-34894.101694
GO:0003879	ATP phosphoribosyltransferase activity	molecular_function	0.048039	0.91009	2	1654	11	49533	Cluster-34894.6548,Cluster-35241.0
GO:0030153	bacteriocin immunity	biological_process	0.048094	0.91009	4	1654	42	49533	Cluster-34894.47835,Cluster-34894.30879,Cluster-34894.50952,Cluster-34894.79586
GO:0009523	photosystem II	cellular_component	0.048318	0.91009	13	1654	228	49533	Cluster-34894.70050,Cluster-34894.81166,Cluster-34894.14910,Cluster-34894.63859,Cluster-34894.68939,Cluster-34894.87268,Cluster-34894.41592,Cluster-34894.90148,Cluster-10748.0,Cluster-34894.26738,Cluster-34894.77127,Cluster-34894.50449,Cluster-34894.73870
GO:0003989	acetyl-CoA carboxylase activity	molecular_function	0.048935	0.91009	4	1654	42	49533	Cluster-34894.76650,Cluster-34894.13879,Cluster-34894.17291,Cluster-34894.17294
GO:0009317	acetyl-CoA carboxylase complex	cellular_component	0.048935	0.91009	4	1654	42	49533	Cluster-34894.17291,Cluster-34894.13879,Cluster-34894.76650,Cluster-34894.17294
GO:0016421	CoA carboxylase activity	molecular_function	0.048935	0.91009	4	1654	42	49533	Cluster-34894.17291,Cluster-34894.13879,Cluster-34894.76650,Cluster-34894.17294
GO:0016885	ligase activity, forming carbon-carbon bonds	molecular_function	0.048935	0.91009	4	1654	42	49533	Cluster-34894.17294,Cluster-34894.13879,Cluster-34894.76650,Cluster-34894.17291
GO:0030170	pyridoxal phosphate binding	molecular_function	0.049926	0.9251	8	1654	113	49533	Cluster-34894.66591,Cluster-34894.47040,Cluster-34894.80043,Cluster-34894.106840,Cluster-34894.34901,Cluster-34894.88991,Cluster-28743.0,Cluster-34894.82993
GO:0042398	cellular modified amino acid biosynthetic process	biological_process	0.050459	0.93012	15	1654	261	49533	Cluster-34894.10810,Cluster-34894.63209,Cluster-34894.22436,Cluster-34894.61252,Cluster-16758.1,Cluster-34894.8401,Cluster-34894.98548,Cluster-34894.61254,Cluster-34894.29157,Cluster-34894.45376,Cluster-34894.36035,Cluster-16718.0,Cluster-34894.95221,Cluster-34894.61730,Cluster-34894.64717
GO:0006563	L-serine metabolic process	biological_process	0.050813	0.93012	5	1654	56	49533	Cluster-34894.41391,Cluster-34894.99967,Cluster-34894.83331,Cluster-34894.83329,Cluster-34894.17719
GO:0010629	negative regulation of gene expression	biological_process	0.051354	0.93012	10	1654	155	49533	Cluster-34894.101011,Cluster-34894.6241,Cluster-34894.2329,Cluster-34894.17604,Cluster-19183.0,Cluster-34894.81610,Cluster-34894.78867,Cluster-34894.71563,Cluster-34894.13664,Cluster-34894.98656
GO:0003690	double-stranded DNA binding	molecular_function	0.051786	0.93012	7	1654	97	49533	Cluster-34894.93597,Cluster-34894.27841,Cluster-34894.95221,Cluster-34894.60834,Cluster-34894.82976,Cluster-34894.46259,Cluster-34894.41957
GO:0031982	vesicle	cellular_component	0.051917	0.93012	23	1654	496	49533	Cluster-34894.46259,Cluster-34894.13361,Cluster-34894.51890,Cluster-34894.47996,Cluster-34894.32549,Cluster-34894.79362,Cluster-34894.11431,Cluster-34894.108307,Cluster-34894.79358,Cluster-29404.0,Cluster-34894.33419,Cluster-34894.53919,Cluster-34894.47768,Cluster-34894.34704,Cluster-34894.16252,Cluster-34894.26768,Cluster-34894.30922,Cluster-34894.33082,Cluster-34894.55389,Cluster-34894.8401,Clu…
GO:0033993	response to lipid	biological_process	0.052275	0.93012	10	1654	154	49533	Cluster-34894.59904,Cluster-34894.58638,Cluster-34894.79362,Cluster-34894.45425,Cluster-34894.65312,Cluster-34894.45429,Cluster-34894.52963,Cluster-34894.84142,Cluster-34894.36935,Cluster-34894.60220
GO:0043401	steroid hormone mediated signaling pathway	biological_process	0.052275	0.93012	10	1654	154	49533	Cluster-34894.45429,Cluster-34894.52963,Cluster-34894.84142,Cluster-34894.36935,Cluster-34894.60220,Cluster-34894.58638,Cluster-34894.59904,Cluster-34894.79362,Cluster-34894.45425,Cluster-34894.65312
GO:0048545	response to steroid hormone	biological_process	0.052275	0.93012	10	1654	154	49533	Cluster-34894.52963,Cluster-34894.84142,Cluster-34894.36935,Cluster-34894.60220,Cluster-34894.45429,Cluster-34894.79362,Cluster-34894.65312,Cluster-34894.45425,Cluster-34894.59904,Cluster-34894.58638
GO:0071383	cellular response to steroid hormone stimulus	biological_process	0.052275	0.93012	10	1654	154	49533	Cluster-34894.79362,Cluster-34894.65312,Cluster-34894.45425,Cluster-34894.59904,Cluster-34894.58638,Cluster-34894.52963,Cluster-34894.84142,Cluster-34894.36935,Cluster-34894.60220,Cluster-34894.45429
GO:0071396	cellular response to lipid	biological_process	0.052275	0.93012	10	1654	154	49533	Cluster-34894.45429,Cluster-34894.84142,Cluster-34894.52963,Cluster-34894.60220,Cluster-34894.36935,Cluster-34894.58638,Cluster-34894.59904,Cluster-34894.79362,Cluster-34894.45425,Cluster-34894.65312
GO:0071407	cellular response to organic cyclic compound	biological_process	0.052275	0.93012	10	1654	154	49533	Cluster-34894.58638,Cluster-34894.59904,Cluster-34894.79362,Cluster-34894.45425,Cluster-34894.65312,Cluster-34894.45429,Cluster-34894.52963,Cluster-34894.84142,Cluster-34894.36935,Cluster-34894.60220
GO:0016709	oxidoreductase activity, acting on paired donors, with incorporation or reduction of molecular oxygen, NAD(P)H as one donor, and incorporation of one atom of oxygen	molecular_function	0.052412	0.93012	4	1654	41	49533	Cluster-34894.65259,Cluster-34894.61254,Cluster-34894.10279,Cluster-34894.61252
GO:0008649	rRNA methyltransferase activity	molecular_function	0.053698	0.94748	3	1654	24	49533	Cluster-34894.41687,Cluster-34894.63014,Cluster-34894.41191
GO:0008023	transcription elongation factor complex	cellular_component	0.053766	0.94748	4	1654	43	49533	Cluster-34894.91000,Cluster-34894.69437,Cluster-34894.101381,Cluster-34894.101380
GO:0032787	monocarboxylic acid metabolic process	biological_process	0.054212	0.95202	34	1654	729	49533	Cluster-34894.61254,Cluster-34894.76650,Cluster-34894.53949,Cluster-34894.61252,Cluster-34894.29908,Cluster-34894.64717,Cluster-34894.13879,Cluster-34894.36035,Cluster-34894.51231,Cluster-34894.71967,Cluster-34894.58719,Cluster-34894.17294,Cluster-34894.63209,Cluster-34894.92759,Cluster-34894.43602,Cluster-12597.1,Cluster-34894.35111,Cluster-34894.59866,Cluster-34894.42545,Cluster-34894.17291,Clu…
GO:0020037	heme binding	molecular_function	0.054761	0.95831	18	1654	352	49533	Cluster-34894.59164,Cluster-34894.59915,Cluster-34894.96740,Cluster-34894.100671,Cluster-34894.99615,Cluster-34894.59165,Cluster-34894.41360,Cluster-34894.51818,Cluster-34894.46098,Cluster-34894.41359,Cluster-34894.50485,Cluster-34894.58595,Cluster-34894.41361,Cluster-34894.61954,Cluster-34894.33109,Cluster-34894.82747,Cluster-34894.69838,Cluster-34894.41362
GO:0004359	glutaminase activity	molecular_function	0.055175	0.96207	3	1654	24	49533	Cluster-34894.11016,Cluster-34894.110192,Cluster-34894.31774
GO:0016413	O-acetyltransferase activity	molecular_function	0.055357	0.96207	2	1654	12	49533	Cluster-34894.41391,Cluster-34894.17719
GO:0008276	protein methyltransferase activity	molecular_function	0.057491	0.99352	8	1654	109	49533	Cluster-34894.7650,Cluster-34894.63399,Cluster-34894.96657,Cluster-34894.61974,Cluster-34894.41191,Cluster-34894.7647,Cluster-34894.99970,Cluster-34894.99221
GO:0006541	glutamine metabolic process	biological_process	0.057703	0.99352	4	1654	40	49533	Cluster-34894.110192,Cluster-34894.98975,Cluster-34894.31774,Cluster-34894.11016
GO:0007601	visual perception	biological_process	0.058458	0.99352	2	1654	13	49533	Cluster-34894.104654,Cluster-34894.29377
GO:0030553	cGMP binding	molecular_function	0.058458	0.99352	2	1654	13	49533	Cluster-34894.29377,Cluster-34894.104654
GO:0050953	sensory perception of light stimulus	biological_process	0.058458	0.99352	2	1654	13	49533	Cluster-34894.104654,Cluster-34894.29377
GO:0044057	regulation of system process	biological_process	0.058689	0.99352	5	1654	59	49533	Cluster-34894.8479,Cluster-34894.8480,Cluster-34894.8481,Cluster-34894.59783,Cluster-34894.61954
GO:0004114	3',5'-cyclic-nucleotide phosphodiesterase activity	molecular_function	0.059116	0.99352	6	1654	81	49533	Cluster-34894.104654,Cluster-34894.21450,Cluster-34894.70803,Cluster-34894.46408,Cluster-34894.29377,Cluster-34894.89022
GO:0000184	nuclear-transcribed mRNA catabolic process, nonsense-mediated decay	biological_process	0.059149	0.99352	4	1654	46	49533	Cluster-34894.15889,Cluster-34894.93280,Cluster-34894.28879,Cluster-34894.15887
GO:0001726	ruffle	cellular_component	0.059262	0.99352	2	1654	11	49533	Cluster-34894.8057,Cluster-34894.8591
GO:0031252	cell leading edge	cellular_component	0.059262	0.99352	2	1654	11	49533	Cluster-34894.8591,Cluster-34894.8057
GO:0051119	sugar transmembrane transporter activity	molecular_function	0.059335	0.99352	3	1654	25	49533	Cluster-34894.85012,Cluster-34894.101377,Cluster-32401.0
GO:0004045	aminoacyl-tRNA hydrolase activity	molecular_function	0.060556	0.99631	2	1654	12	49533	Cluster-34894.73823,Cluster-34894.100616
GO:0042168	heme metabolic process	biological_process	0.061199	0.99631	6	1654	75	49533	Cluster-34894.61254,Cluster-34894.101694,Cluster-34894.92197,Cluster-34894.82976,Cluster-34894.77308,Cluster-34894.61252
GO:0006479	protein methylation	biological_process	0.061545	0.99631	9	1654	132	49533	Cluster-34894.7650,Cluster-34894.63399,Cluster-34894.96657,Cluster-34894.61974,Cluster-34894.41687,Cluster-34894.41191,Cluster-34894.7647,Cluster-34894.99970,Cluster-34894.99221
GO:0008213	protein alkylation	biological_process	0.061545	0.99631	9	1654	132	49533	Cluster-34894.63399,Cluster-34894.96657,Cluster-34894.7650,Cluster-34894.61974,Cluster-34894.7647,Cluster-34894.41687,Cluster-34894.41191,Cluster-34894.99221,Cluster-34894.99970
GO:0046872	metal ion binding	molecular_function	0.061644	0.99631	286	1654	7614	49533	Cluster-34894.81166,Cluster-34894.79362,Cluster-34894.31620,Cluster-34894.100732,Cluster-34894.98763,Cluster-34894.18055,Cluster-34894.62964,Cluster-34894.85230,Cluster-34894.61603,Cluster-34894.7444,Cluster-34894.50485,Cluster-9183.0,Cluster-26774.0,Cluster-34894.102233,Cluster-34894.53524,Cluster-34894.9945,Cluster-34894.39246,Cluster-34894.97043,Cluster-34894.104963,Cluster-34894.15666,Cluster…
GO:0035306	positive regulation of dephosphorylation	biological_process	0.062085	0.99631	2	1654	13	49533	Cluster-34894.54542,Cluster-34894.49745
GO:0035307	positive regulation of protein dephosphorylation	biological_process	0.062085	0.99631	2	1654	13	49533	Cluster-34894.49745,Cluster-34894.54542
GO:0071595	Nem1-Spo7 phosphatase complex	cellular_component	0.062085	0.99631	2	1654	13	49533	Cluster-34894.49745,Cluster-34894.54542
GO:0051186	cofactor metabolic process	biological_process	0.062144	0.99631	43	1654	946	49533	Cluster-29366.0,Cluster-34894.63117,Cluster-16758.1,Cluster-34894.86397,Cluster-34894.54153,Cluster-34894.58638,Cluster-34894.45376,Cluster-34894.72801,Cluster-34894.10810,Cluster-34894.104963,Cluster-34894.61730,Cluster-34894.59652,Cluster-34894.92197,Cluster-34894.19108,Cluster-34894.81829,Cluster-34894.76990,Cluster-34894.61254,Cluster-34894.61252,Cluster-34894.53949,Cluster-34894.98548,Cluste…
GO:0051235	maintenance of location	biological_process	0.062484	0.99631	8	1654	115	49533	Cluster-34894.8591,Cluster-34894.53590,Cluster-34894.8057,Cluster-34894.12115,Cluster-7665.0,Cluster-34894.90646,Cluster-34894.65039,Cluster-34894.32737
GO:0044456	synapse part	cellular_component	0.062573	0.99631	2	1654	13	49533	Cluster-34894.105318,Cluster-34894.24264
GO:0048786	presynaptic active zone	cellular_component	0.062573	0.99631	2	1654	13	49533	Cluster-34894.24264,Cluster-34894.105318
GO:0097458	neuron part	cellular_component	0.062573	0.99631	2	1654	13	49533	Cluster-34894.24264,Cluster-34894.105318
GO:0098793	presynapse	cellular_component	0.062573	0.99631	2	1654	13	49533	Cluster-34894.105318,Cluster-34894.24264
GO:0016746	transferase activity, transferring acyl groups	molecular_function	0.062609	0.99631	28	1654	582	49533	Cluster-34894.53949,Cluster-34894.55942,Cluster-34894.101808,Cluster-34894.6976,Cluster-34894.54152,Cluster-34894.41391,Cluster-34894.102233,Cluster-34894.103035,Cluster-34894.74967,Cluster-34894.82993,Cluster-34894.62579,Cluster-34894.60314,Cluster-34894.30269,Cluster-34894.56266,Cluster-34894.60078,Cluster-34894.58719,Cluster-27541.0,Cluster-34894.49080,Cluster-34894.80873,Cluster-34894.92759,C…
GO:0006732	coenzyme metabolic process	biological_process	0.062665	0.99631	36	1654	777	49533	Cluster-16758.1,Cluster-34894.63117,Cluster-29366.0,Cluster-34894.58638,Cluster-34894.54153,Cluster-34894.86397,Cluster-34894.10810,Cluster-34894.45376,Cluster-34894.72801,Cluster-34894.19108,Cluster-34894.59652,Cluster-34894.81829,Cluster-34894.76990,Cluster-34894.61730,Cluster-34894.98548,Cluster-34894.61252,Cluster-34894.53949,Cluster-34894.61254,Cluster-34894.56369,Cluster-34894.38372,Cluster…
GO:0004616	phosphogluconate dehydrogenase (decarboxylating) activity	molecular_function	0.063297	1	4	1654	39	49533	Cluster-34894.63117,Cluster-34894.61252,Cluster-34894.61254,Cluster-34894.61730
GO:0019521	D-gluconate metabolic process	biological_process	0.063297	1	4	1654	39	49533	Cluster-34894.61252,Cluster-34894.63117,Cluster-34894.61730,Cluster-34894.61254
GO:0009719	response to endogenous stimulus	biological_process	0.06385	1	12	1654	207	49533	Cluster-34894.36935,Cluster-34894.60220,Cluster-34894.52963,Cluster-34894.84142,Cluster-34894.45429,Cluster-34894.45425,Cluster-34894.65312,Cluster-34894.73042,Cluster-34894.79362,Cluster-34894.59904,Cluster-34894.58638,Cluster-34894.81065
GO:0009755	hormone-mediated signaling pathway	biological_process	0.064437	1	10	1654	160	49533	Cluster-34894.45429,Cluster-34894.36935,Cluster-34894.60220,Cluster-34894.52963,Cluster-34894.84142,Cluster-34894.59904,Cluster-34894.58638,Cluster-34894.45425,Cluster-34894.65312,Cluster-34894.79362
GO:0032870	cellular response to hormone stimulus	biological_process	0.064437	1	10	1654	160	49533	Cluster-34894.45429,Cluster-34894.60220,Cluster-34894.36935,Cluster-34894.84142,Cluster-34894.52963,Cluster-34894.58638,Cluster-34894.59904,Cluster-34894.45425,Cluster-34894.65312,Cluster-34894.79362
GO:0006954	inflammatory response	biological_process	0.065151	1	4	1654	45	49533	Cluster-34894.65879,Cluster-10841.0,Cluster-34894.71490,Cluster-34894.33859
GO:0043169	cation binding	molecular_function	0.065253	1	287	1654	7652	49533	Cluster-34894.79362,Cluster-34894.81166,Cluster-34894.100732,Cluster-34894.98763,Cluster-34894.31620,Cluster-34894.18055,Cluster-34894.50485,Cluster-34894.85230,Cluster-34894.62964,Cluster-34894.61603,Cluster-34894.7444,Cluster-26774.0,Cluster-34894.102233,Cluster-9183.0,Cluster-34894.39246,Cluster-34894.97043,Cluster-34894.104963,Cluster-34894.15666,Cluster-34894.53524,Cluster-34894.9945,Cluster…
GO:0004675	transmembrane receptor protein serine/threonine kinase activity	molecular_function	0.066094	1	6	1654	80	49533	Cluster-34894.69855,Cluster-34894.100795,Cluster-34894.90581,Cluster-34894.81805,Cluster-34894.81865,Cluster-34894.100797
GO:0007178	transmembrane receptor protein serine/threonine kinase signaling pathway	biological_process	0.066094	1	6	1654	80	49533	Cluster-34894.100797,Cluster-34894.81865,Cluster-34894.69855,Cluster-34894.100795,Cluster-34894.81805,Cluster-34894.90581
GO:0016616	oxidoreductase activity, acting on the CH-OH group of donors, NAD or NADP as acceptor	molecular_function	0.067037	1	15	1654	264	49533	Cluster-34894.42545,Cluster-34894.81829,Cluster-34894.56369,Cluster-34894.46259,Cluster-34894.29908,Cluster-34894.61730,Cluster-34894.27841,Cluster-34894.61733,Cluster-34894.63117,Cluster-34894.109466,Cluster-34894.96635,Cluster-34894.61252,Cluster-34894.59881,Cluster-34894.61254,Cluster-34894.63617
GO:0000097	sulfur amino acid biosynthetic process	biological_process	0.068553	1	2	1654	13	49533	Cluster-34894.17719,Cluster-34894.41391
GO:0009070	serine family amino acid biosynthetic process	biological_process	0.068787	1	2	1654	14	49533	Cluster-34894.17719,Cluster-34894.41391
GO:0097196	Shu complex	cellular_component	0.06913	1	2	1654	12	49533	Cluster-34894.34704,Cluster-34894.75748
GO:0031410	cytoplasmic vesicle	cellular_component	0.069147	1	22	1654	487	49533	Cluster-34894.33419,Cluster-29404.0,Cluster-34894.47768,Cluster-34894.53919,Cluster-34894.47996,Cluster-34894.51890,Cluster-34894.13361,Cluster-34894.46259,Cluster-34894.108307,Cluster-34894.79358,Cluster-34894.11431,Cluster-34894.79362,Cluster-34894.32549,Cluster-34894.55389,Cluster-34894.81805,Cluster-34894.30922,Cluster-34894.33082,Cluster-34894.26768,Cluster-34894.68037,Cluster-34894.13896,Cl…
GO:0009539	photosystem II reaction center	cellular_component	0.069482	1	8	1654	128	49533	Cluster-34894.68939,Cluster-34894.41592,Cluster-34894.63859,Cluster-34894.14910,Cluster-34894.70050,Cluster-34894.50449,Cluster-34894.73870,Cluster-34894.77127
GO:0019520	aldonic acid metabolic process	biological_process	0.069634	1	4	1654	40	49533	Cluster-34894.63117,Cluster-34894.61252,Cluster-34894.61730,Cluster-34894.61254
GO:0009237	siderophore metabolic process	biological_process	0.069719	1	1	1654	2	49533	Cluster-8208.0
GO:0015343	siderophore transmembrane transporter activity	molecular_function	0.069719	1	1	1654	2	49533	Cluster-8208.0
GO:0015603	iron chelate transmembrane transporter activity	molecular_function	0.069719	1	1	1654	2	49533	Cluster-8208.0
GO:0019290	siderophore biosynthetic process	biological_process	0.069719	1	1	1654	2	49533	Cluster-8208.0
GO:0042927	siderophore transporter activity	molecular_function	0.069719	1	1	1654	2	49533	Cluster-8208.0
GO:0031988	membrane-bounded vesicle	cellular_component	0.071719	1	21	1654	465	49533	Cluster-34894.34704,Cluster-34894.16252,Cluster-34894.26768,Cluster-34894.8401,Cluster-34894.81805,Cluster-34894.55389,Cluster-34894.33082,Cluster-34894.68037,Cluster-34894.13896,Cluster-34894.46259,Cluster-34894.13361,Cluster-34894.47996,Cluster-34894.32549,Cluster-34894.79362,Cluster-34894.108307,Cluster-34894.79358,Cluster-34894.11431,Cluster-34894.33419,Cluster-29404.0,Cluster-34894.53919,Clu…
GO:0045132	meiotic chromosome segregation	biological_process	0.072077	1	4	1654	44	49533	Cluster-34894.15714,Cluster-34894.35213,Cluster-34894.25747,Cluster-34894.76815
GO:0018022	peptidyl-lysine methylation	biological_process	0.07209	1	3	1654	27	49533	Cluster-34894.7650,Cluster-34894.7647,Cluster-34894.63399
GO:0034968	histone lysine methylation	biological_process	0.07209	1	3	1654	27	49533	Cluster-34894.7650,Cluster-34894.63399,Cluster-34894.7647
GO:0004089	carbonate dehydratase activity	molecular_function	0.072762	1	1	1654	2	49533	Cluster-34894.33912
GO:0005774	vacuolar membrane	cellular_component	0.074208	1	4	1654	42	49533	Cluster-34894.31028,Cluster-34894.15898,Cluster-34894.40744,Cluster-34894.72073
GO:0044437	vacuolar part	cellular_component	0.074208	1	4	1654	42	49533	Cluster-34894.40744,Cluster-34894.72073,Cluster-34894.15898,Cluster-34894.31028
GO:0071495	cellular response to endogenous stimulus	biological_process	0.074367	1	10	1654	166	49533	Cluster-34894.52963,Cluster-34894.84142,Cluster-34894.36935,Cluster-34894.60220,Cluster-34894.45429,Cluster-34894.79362,Cluster-34894.65312,Cluster-34894.45425,Cluster-34894.58638,Cluster-34894.59904
GO:0016773	phosphotransferase activity, alcohol group as acceptor	molecular_function	0.074852	1	90	1654	2149	49533	Cluster-34894.54183,Cluster-34894.76188,Cluster-34894.15240,Cluster-34894.22527,Cluster-34894.45376,Cluster-22875.0,Cluster-34894.24887,Cluster-34894.102600,Cluster-34894.19108,Cluster-34894.21351,Cluster-34894.97671,Cluster-34894.17060,Cluster-34894.100797,Cluster-34894.90725,Cluster-34894.49396,Cluster-34894.100795,Cluster-34894.77905,Cluster-18203.0,Cluster-15271.0,Cluster-34894.24432,Cluster-…
GO:0009268	response to pH	biological_process	0.075859	1	1	1654	2	49533	Cluster-32564.2
GO:0010447	response to acidic pH	biological_process	0.075859	1	1	1654	2	49533	Cluster-32564.2
GO:0015939	pantothenate metabolic process	biological_process	0.076932	1	6	1654	82	49533	Cluster-34894.61254,Cluster-34894.45376,Cluster-34894.64717,Cluster-34894.36035,Cluster-34894.63209,Cluster-34894.61252
GO:0015940	pantothenate biosynthetic process	biological_process	0.076932	1	6	1654	82	49533	Cluster-34894.61252,Cluster-34894.36035,Cluster-34894.63209,Cluster-34894.45376,Cluster-34894.64717,Cluster-34894.61254
GO:0050660	flavin adenine dinucleotide binding	molecular_function	0.077569	1	10	1654	160	49533	Cluster-34894.17808,Cluster-34894.61254,Cluster-34894.65259,Cluster-34894.37859,Cluster-34894.103235,Cluster-34894.77308,Cluster-34894.61252,Cluster-34894.10279,Cluster-34894.54219,Cluster-34894.92197
GO:0030551	cyclic nucleotide binding	molecular_function	0.078454	1	2	1654	15	49533	Cluster-34894.104654,Cluster-34894.29377
GO:0034357	photosynthetic membrane	cellular_component	0.078509	1	17	1654	346	49533	Cluster-34894.73870,Cluster-34894.54754,Cluster-34894.77127,Cluster-34894.26738,Cluster-10748.0,Cluster-34894.41592,Cluster-34894.63859,Cluster-34894.81166,Cluster-34894.50449,Cluster-34894.55013,Cluster-34894.35505,Cluster-34894.46732,Cluster-34894.90148,Cluster-34894.87268,Cluster-34894.68939,Cluster-34894.14910,Cluster-34894.70050
GO:0004470	malic enzyme activity	molecular_function	0.079417	1	2	1654	13	49533	Cluster-34894.29908,Cluster-34894.59881
GO:0004471	malate dehydrogenase (decarboxylating) (NAD+) activity	molecular_function	0.079417	1	2	1654	13	49533	Cluster-34894.29908,Cluster-34894.59881
GO:0006108	malate metabolic process	biological_process	0.079417	1	2	1654	13	49533	Cluster-34894.59881,Cluster-34894.29908
GO:0016337	single organismal cell-cell adhesion	biological_process	0.079549	1	1	1654	3	49533	Cluster-34894.16252
GO:0006030	chitin metabolic process	biological_process	0.080187	1	5	1654	69	49533	Cluster-34894.29731,Cluster-34894.44752,Cluster-34894.55056,Cluster-34894.59136,Cluster-34894.58271
GO:1901071	glucosamine-containing compound metabolic process	biological_process	0.080187	1	5	1654	69	49533	Cluster-34894.55056,Cluster-34894.44752,Cluster-34894.58271,Cluster-34894.59136,Cluster-34894.29731
GO:0000105	histidine biosynthetic process	biological_process	0.080252	1	4	1654	47	49533	Cluster-4270.2,Cluster-34894.46259,Cluster-34894.6548,Cluster-35241.0
GO:0007129	synapsis	biological_process	0.080441	1	3	1654	29	49533	Cluster-34894.15714,Cluster-34894.25747,Cluster-34894.35213
GO:0007130	synaptonemal complex assembly	biological_process	0.080441	1	3	1654	29	49533	Cluster-34894.15714,Cluster-34894.35213,Cluster-34894.25747
GO:0045143	homologous chromosome segregation	biological_process	0.080441	1	3	1654	29	49533	Cluster-34894.15714,Cluster-34894.25747,Cluster-34894.35213
GO:0070192	chromosome organization involved in meiosis	biological_process	0.080441	1	3	1654	29	49533	Cluster-34894.15714,Cluster-34894.25747,Cluster-34894.35213
GO:0070193	synaptonemal complex organization	biological_process	0.080441	1	3	1654	29	49533	Cluster-34894.15714,Cluster-34894.25747,Cluster-34894.35213
GO:0000372	Group I intron splicing	biological_process	0.081312	1	2	1654	14	49533	Cluster-34894.81644,Cluster-34894.81648
GO:0000376	RNA splicing, via transesterification reactions with guanosine as nucleophile	biological_process	0.081312	1	2	1654	14	49533	Cluster-34894.81644,Cluster-34894.81648
GO:0010883	regulation of lipid storage	biological_process	0.081482	1	2	1654	14	49533	Cluster-34894.53590,Cluster-7665.0
GO:0010884	positive regulation of lipid storage	biological_process	0.081482	1	2	1654	14	49533	Cluster-34894.53590,Cluster-7665.0
GO:0008092	cytoskeletal protein binding	molecular_function	0.081586	1	42	1654	973	49533	Cluster-34894.65036,Cluster-34894.66963,Cluster-34894.15715,Cluster-34894.79586,Cluster-34894.15712,Cluster-34894.58030,Cluster-34894.53542,Cluster-34894.63685,Cluster-34894.66718,Cluster-34894.78905,Cluster-34894.98727,Cluster-34894.78553,Cluster-34894.30338,Cluster-34894.96049,Cluster-1082.0,Cluster-34894.27309,Cluster-34894.96484,Cluster-34894.19751,Cluster-34894.17296,Cluster-34894.103764,Clu…
GO:0009273	peptidoglycan-based cell wall biogenesis	biological_process	0.082247	1	6	1654	88	49533	Cluster-34894.86735,Cluster-34894.17292,Cluster-34894.18400,Cluster-34894.98975,Cluster-34894.17293,Cluster-34894.15556
GO:0016747	transferase activity, transferring acyl groups other than amino-acyl groups	molecular_function	0.082513	1	17	1654	332	49533	Cluster-34894.51231,Cluster-34894.41634,Cluster-34894.92759,Cluster-34894.80873,Cluster-34894.12115,Cluster-34894.100382,Cluster-34894.17719,Cluster-34894.41391,Cluster-34894.74967,Cluster-34894.82993,Cluster-34894.53949,Cluster-34894.6976,Cluster-34894.101808,Cluster-34894.54152,Cluster-34894.60078,Cluster-34894.62579,Cluster-34894.60314
GO:0004112	cyclic-nucleotide phosphodiesterase activity	molecular_function	0.083562	1	6	1654	89	49533	Cluster-34894.104654,Cluster-34894.21450,Cluster-34894.70803,Cluster-34894.29377,Cluster-34894.46408,Cluster-34894.89022
GO:0030133	transport vesicle	cellular_component	0.0842	1	15	1654	330	49533	Cluster-34894.79358,Cluster-34894.32549,Cluster-34894.79362,Cluster-34894.47996,Cluster-34894.34704,Cluster-34894.46259,Cluster-34894.13361,Cluster-34894.68037,Cluster-34894.13896,Cluster-34894.53919,Cluster-34894.81805,Cluster-34894.33082,Cluster-34894.26768,Cluster-34894.33419,Cluster-29404.0
GO:0017080	sodium channel regulator activity	molecular_function	0.085076	1	5	1654	67	49533	Cluster-34894.64310,Cluster-34894.56941,Cluster-34894.88440,Cluster-34894.63090,Cluster-34894.85513
GO:0019871	sodium channel inhibitor activity	molecular_function	0.085076	1	5	1654	67	49533	Cluster-34894.85513,Cluster-34894.56941,Cluster-34894.64310,Cluster-34894.63090,Cluster-34894.88440
GO:0006928	movement of cell or subcellular component	biological_process	0.086058	1	31	1654	698	49533	Cluster-34894.79586,Cluster-34894.15712,Cluster-14514.0,Cluster-34894.64041,Cluster-34894.62000,Cluster-34894.70207,Cluster-34894.62381,Cluster-34894.14094,Cluster-34894.35044,Cluster-34894.49717,Cluster-34894.19751,Cluster-34894.17296,Cluster-37016.0,Cluster-34894.78560,Cluster-34894.105470,Cluster-34894.78905,Cluster-34894.79588,Cluster-34894.98727,Cluster-34894.14312,Cluster-34894.15713,Cluste…
GO:0005637	nuclear inner membrane	cellular_component	0.086213	1	2	1654	15	49533	Cluster-34894.13287,Cluster-34894.13286
GO:0005639	integral component of nuclear inner membrane	cellular_component	0.086213	1	2	1654	15	49533	Cluster-34894.13286,Cluster-34894.13287
GO:0031229	intrinsic component of nuclear inner membrane	cellular_component	0.086213	1	2	1654	15	49533	Cluster-34894.13286,Cluster-34894.13287
GO:0044453	nuclear membrane part	cellular_component	0.086213	1	2	1654	15	49533	Cluster-34894.13287,Cluster-34894.13286
GO:0007051	spindle organization	biological_process	0.087137	1	4	1654	50	49533	Cluster-34894.16182,Cluster-34894.15710,Cluster-34894.99254,Cluster-34894.19751
GO:0019199	transmembrane receptor protein kinase activity	molecular_function	0.087327	1	8	1654	130	49533	Cluster-34894.78970,Cluster-34894.100797,Cluster-34894.81865,Cluster-34894.77939,Cluster-34894.90581,Cluster-34894.81805,Cluster-34894.100795,Cluster-34894.69855
GO:0018205	peptidyl-lysine modification	biological_process	0.087473	1	5	1654	68	49533	Cluster-34894.63399,Cluster-34894.48561,Cluster-34894.101808,Cluster-34894.7647,Cluster-34894.7650
GO:0016108	tetraterpenoid metabolic process	biological_process	0.088926	1	3	1654	28	49533	Cluster-34894.61254,Cluster-34894.92197,Cluster-34894.37859
GO:0016109	tetraterpenoid biosynthetic process	biological_process	0.088926	1	3	1654	28	49533	Cluster-34894.61254,Cluster-34894.37859,Cluster-34894.92197
GO:0016116	carotenoid metabolic process	biological_process	0.088926	1	3	1654	28	49533	Cluster-34894.37859,Cluster-34894.92197,Cluster-34894.61254
GO:0016117	carotenoid biosynthetic process	biological_process	0.088926	1	3	1654	28	49533	Cluster-34894.61254,Cluster-34894.92197,Cluster-34894.37859
GO:0044433	cytoplasmic vesicle part	cellular_component	0.089189	1	16	1654	356	49533	Cluster-34894.34704,Cluster-34894.16252,Cluster-34894.26768,Cluster-34894.30922,Cluster-34894.33082,Cluster-34894.81805,Cluster-34894.13896,Cluster-34894.68037,Cluster-34894.51890,Cluster-34894.47996,Cluster-34894.79362,Cluster-34894.32549,Cluster-34894.79358,Cluster-29404.0,Cluster-34894.33419,Cluster-34894.53919
GO:0018112	proline racemase activity	molecular_function	0.089528	1	1	1654	3	49533	Cluster-34894.47056
GO:0009579	thylakoid	cellular_component	0.089714	1	19	1654	402	49533	Cluster-34894.14910,Cluster-34894.70050,Cluster-34894.90148,Cluster-34894.68939,Cluster-34894.87268,Cluster-34894.33977,Cluster-34894.35505,Cluster-34894.46732,Cluster-34894.77308,Cluster-34894.50449,Cluster-34894.55013,Cluster-34894.81166,Cluster-34894.63859,Cluster-10748.0,Cluster-34894.41592,Cluster-34894.77127,Cluster-34894.54754,Cluster-34894.26738,Cluster-34894.73870
GO:0044436	thylakoid part	cellular_component	0.089714	1	19	1654	402	49533	Cluster-34894.54754,Cluster-34894.77127,Cluster-34894.26738,Cluster-34894.73870,Cluster-34894.63859,Cluster-34894.81166,Cluster-10748.0,Cluster-34894.41592,Cluster-34894.35505,Cluster-34894.46732,Cluster-34894.77308,Cluster-34894.50449,Cluster-34894.55013,Cluster-34894.14910,Cluster-34894.70050,Cluster-34894.90148,Cluster-34894.87268,Cluster-34894.33977,Cluster-34894.68939
GO:0042546	cell wall biogenesis	biological_process	0.089865	1	7	1654	114	49533	Cluster-34894.17293,Cluster-34894.98975,Cluster-34894.15556,Cluster-34894.17292,Cluster-34894.31051,Cluster-34894.86735,Cluster-34894.18400
GO:0012506	vesicle membrane	cellular_component	0.092277	1	15	1654	334	49533	Cluster-34894.33082,Cluster-34894.81805,Cluster-34894.8401,Cluster-29404.0,Cluster-34894.33419,Cluster-34894.26768,Cluster-34894.13896,Cluster-34894.68037,Cluster-34894.53919,Cluster-34894.16252,Cluster-34894.47996,Cluster-34894.34704,Cluster-34894.79358,Cluster-34894.79362,Cluster-34894.32549
GO:0046906	tetrapyrrole binding	molecular_function	0.093048	1	18	1654	375	49533	Cluster-34894.41362,Cluster-34894.69838,Cluster-34894.82747,Cluster-34894.61954,Cluster-34894.41361,Cluster-34894.33109,Cluster-34894.50485,Cluster-34894.58595,Cluster-34894.46098,Cluster-34894.41359,Cluster-34894.51818,Cluster-34894.99615,Cluster-34894.59165,Cluster-34894.41360,Cluster-34894.100671,Cluster-34894.96740,Cluster-34894.59915,Cluster-34894.59164
GO:0016023	cytoplasmic membrane-bounded vesicle	cellular_component	0.094867	1	20	1654	456	49533	Cluster-34894.53919,Cluster-34894.47768,Cluster-29404.0,Cluster-34894.33419,Cluster-34894.32549,Cluster-34894.79362,Cluster-34894.11431,Cluster-34894.108307,Cluster-34894.79358,Cluster-34894.46259,Cluster-34894.13361,Cluster-34894.47996,Cluster-34894.13896,Cluster-34894.68037,Cluster-34894.26768,Cluster-34894.33082,Cluster-34894.55389,Cluster-34894.81805,Cluster-34894.34704,Cluster-34894.16252
GO:0009916	alternative oxidase activity	molecular_function	0.097482	1	2	1654	14	49533	Cluster-34894.16125,Cluster-34894.44206
GO:0016645	oxidoreductase activity, acting on the CH-NH group of donors	molecular_function	0.098137	1	6	1654	86	49533	Cluster-34894.22318,Cluster-34894.52963,Cluster-34894.61730,Cluster-34894.38372,Cluster-34894.58638,Cluster-16758.1
GO:0006022	aminoglycan metabolic process	biological_process	0.098385	1	13	1654	254	49533	Cluster-34894.18176,Cluster-34894.86735,Cluster-34894.18400,Cluster-34894.17293,Cluster-34894.98975,Cluster-34894.14094,Cluster-34894.44752,Cluster-34894.17292,Cluster-34894.29731,Cluster-34894.58271,Cluster-34894.59136,Cluster-34894.1649,Cluster-34894.55056
GO:0014070	response to organic cyclic compound	biological_process	0.098867	1	10	1654	176	49533	Cluster-34894.58638,Cluster-34894.59904,Cluster-34894.79362,Cluster-34894.45425,Cluster-34894.65312,Cluster-34894.45429,Cluster-34894.52963,Cluster-34894.84142,Cluster-34894.36935,Cluster-34894.60220
GO:0007213	G-protein coupled acetylcholine receptor signaling pathway	biological_process	0.10059	1	1	1654	3	49533	Cluster-34894.7442
GO:0043113	receptor clustering	biological_process	0.10059	1	1	1654	3	49533	Cluster-34894.7442
GO:0043236	laminin binding	molecular_function	0.10059	1	1	1654	3	49533	Cluster-34894.7442
GO:0075733	intracellular transport of virus	biological_process	0.10063	1	2	1654	17	49533	Cluster-34894.61988,Cluster-34894.98268
GO:1902583	multi-organism intracellular transport	biological_process	0.10063	1	2	1654	17	49533	Cluster-34894.98268,Cluster-34894.61988
GO:0010558	negative regulation of macromolecule biosynthetic process	biological_process	0.10164	1	9	1654	156	49533	Cluster-34894.2329,Cluster-34894.101011,Cluster-34894.6241,Cluster-34894.17604,Cluster-19183.0,Cluster-34894.81610,Cluster-34894.13664,Cluster-34894.98656,Cluster-34894.71563
GO:0031327	negative regulation of cellular biosynthetic process	biological_process	0.10164	1	9	1654	156	49533	Cluster-34894.101011,Cluster-34894.2329,Cluster-34894.6241,Cluster-19183.0,Cluster-34894.81610,Cluster-34894.17604,Cluster-34894.13664,Cluster-34894.98656,Cluster-34894.71563
GO:0051172	negative regulation of nitrogen compound metabolic process	biological_process	0.10164	1	9	1654	156	49533	Cluster-34894.71563,Cluster-34894.98656,Cluster-34894.13664,Cluster-19183.0,Cluster-34894.17604,Cluster-34894.81610,Cluster-34894.101011,Cluster-34894.2329,Cluster-34894.6241
GO:2000113	negative regulation of cellular macromolecule biosynthetic process	biological_process	0.10164	1	9	1654	156	49533	Cluster-34894.101011,Cluster-34894.2329,Cluster-34894.6241,Cluster-19183.0,Cluster-34894.17604,Cluster-34894.81610,Cluster-34894.71563,Cluster-34894.13664,Cluster-34894.98656
GO:0016615	malate dehydrogenase activity	molecular_function	0.10166	1	2	1654	15	49533	Cluster-34894.59881,Cluster-34894.29908
GO:0015979	photosynthesis	biological_process	0.10303	1	19	1654	413	49533	Cluster-34894.70050,Cluster-34894.14910,Cluster-34894.68939,Cluster-34894.87268,Cluster-34894.90148,Cluster-34894.46732,Cluster-34894.30922,Cluster-34894.35505,Cluster-34894.55013,Cluster-34894.50449,Cluster-34894.51890,Cluster-34894.81166,Cluster-34894.63859,Cluster-34894.41592,Cluster-10748.0,Cluster-34894.26738,Cluster-34894.77127,Cluster-34894.54754,Cluster-34894.73870
GO:0017148	negative regulation of translation	biological_process	0.10367	1	3	1654	32	49533	Cluster-34894.98656,Cluster-34894.2329,Cluster-34894.101011
GO:0034249	negative regulation of cellular amide metabolic process	biological_process	0.10367	1	3	1654	32	49533	Cluster-34894.2329,Cluster-34894.101011,Cluster-34894.98656
GO:0033313	meiotic cell cycle checkpoint	biological_process	0.10401	1	1	1654	3	49533	Cluster-34894.60277
GO:0040020	regulation of meiotic nuclear division	biological_process	0.10401	1	1	1654	3	49533	Cluster-34894.60277
GO:0045835	negative regulation of meiotic nuclear division	biological_process	0.10401	1	1	1654	3	49533	Cluster-34894.60277
GO:0051445	regulation of meiotic cell cycle	biological_process	0.10401	1	1	1654	3	49533	Cluster-34894.60277
GO:0051447	negative regulation of meiotic cell cycle	biological_process	0.10401	1	1	1654	3	49533	Cluster-34894.60277
GO:0051598	meiotic recombination checkpoint	biological_process	0.10401	1	1	1654	3	49533	Cluster-34894.60277
GO:1901136	carbohydrate derivative catabolic process	biological_process	0.10408	1	7	1654	116	49533	Cluster-34894.61254,Cluster-34894.14094,Cluster-34894.61252,Cluster-34894.50285,Cluster-34894.46408,Cluster-34894.29731,Cluster-34894.18400
GO:0016571	histone methylation	biological_process	0.10476	1	3	1654	32	49533	Cluster-34894.7650,Cluster-34894.63399,Cluster-34894.7647
GO:0030118	clathrin coat	cellular_component	0.10481	1	5	1654	68	49533	Cluster-34894.53919,Cluster-34894.32549,Cluster-34894.13896,Cluster-34894.34704,Cluster-29404.0
GO:0048037	cofactor binding	molecular_function	0.105	1	33	1654	720	49533	Cluster-34894.10279,Cluster-34894.63117,Cluster-34894.106840,Cluster-34894.55942,Cluster-34894.61730,Cluster-34894.81829,Cluster-34894.92197,Cluster-34894.65259,Cluster-34894.59881,Cluster-34894.37859,Cluster-34894.109466,Cluster-34894.88991,Cluster-34894.34901,Cluster-34894.62019,Cluster-34894.56369,Cluster-34894.46259,Cluster-34894.66591,Cluster-34894.61254,Cluster-34894.104028,Cluster-34894.82…
GO:0051225	spindle assembly	biological_process	0.10694	1	3	1654	33	49533	Cluster-34894.16182,Cluster-34894.99254,Cluster-34894.15710
GO:0000176	nuclear exosome (RNase complex)	cellular_component	0.10727	1	2	1654	15	49533	Cluster-34894.46259,Cluster-34894.15887
GO:0070652	HAUS complex	cellular_component	0.10764	1	2	1654	18	49533	Cluster-34894.15710,Cluster-34894.16182
GO:0009108	coenzyme biosynthetic process	biological_process	0.10826	1	23	1654	499	49533	Cluster-34894.19108,Cluster-16718.0,Cluster-34894.76990,Cluster-34894.34704,Cluster-34894.48364,Cluster-34894.61730,Cluster-34894.95221,Cluster-34894.21131,Cluster-34894.8401,Cluster-34894.63209,Cluster-34894.10810,Cluster-34894.29157,Cluster-34894.45376,Cluster-34894.72801,Cluster-34894.54153,Cluster-34894.36035,Cluster-34894.64717,Cluster-34894.58364,Cluster-16758.1,Cluster-34894.98548,Cluster-…
GO:0071310	cellular response to organic substance	biological_process	0.10889	1	10	1654	179	49533	Cluster-34894.59904,Cluster-34894.58638,Cluster-34894.79362,Cluster-34894.65312,Cluster-34894.45425,Cluster-34894.45429,Cluster-34894.52963,Cluster-34894.84142,Cluster-34894.36935,Cluster-34894.60220
GO:0009396	folic acid-containing compound biosynthetic process	biological_process	0.11053	1	7	1654	115	49533	Cluster-16718.0,Cluster-34894.10810,Cluster-34894.98548,Cluster-34894.8401,Cluster-16758.1,Cluster-34894.95221,Cluster-34894.61730
GO:0008374	O-acyltransferase activity	molecular_function	0.11109	1	3	1654	34	49533	Cluster-34894.60314,Cluster-34894.17719,Cluster-34894.41391
GO:0006555	methionine metabolic process	biological_process	0.11208	1	5	1654	73	49533	Cluster-34894.29157,Cluster-34894.101694,Cluster-34894.52963,Cluster-34894.58638,Cluster-34894.38372
GO:0042597	periplasmic space	cellular_component	0.11245	1	5	1654	72	49533	Cluster-34894.36035,Cluster-34894.46661,Cluster-34894.64699,Cluster-34894.55124,Cluster-32564.2
GO:0019238	cyclohydrolase activity	molecular_function	0.11273	1	3	1654	33	49533	Cluster-34894.97414,Cluster-34894.99918,Cluster-34894.36549
GO:0006276	plasmid maintenance	biological_process	0.11295	1	3	1654	33	49533	Cluster-34894.57323,Cluster-34894.39141,Cluster-34894.75471
GO:0043414	macromolecule methylation	biological_process	0.11346	1	12	1654	223	49533	Cluster-34894.41191,Cluster-34894.41687,Cluster-34894.7647,Cluster-34894.99970,Cluster-34894.99221,Cluster-34894.75683,Cluster-34894.7650,Cluster-24315.0,Cluster-34894.96657,Cluster-34894.63399,Cluster-34894.61974,Cluster-34894.74878
GO:0019814	immunoglobulin complex	cellular_component	0.11352	1	4	1654	56	49533	Cluster-34894.95921,Cluster-34894.50952,Cluster-34894.30879,Cluster-34894.47835
GO:0016614	oxidoreductase activity, acting on CH-OH group of donors	molecular_function	0.11375	1	15	1654	287	49533	Cluster-34894.42545,Cluster-34894.81829,Cluster-34894.56369,Cluster-34894.46259,Cluster-34894.29908,Cluster-34894.27841,Cluster-34894.61730,Cluster-34894.63117,Cluster-34894.61733,Cluster-34894.109466,Cluster-34894.61252,Cluster-34894.96635,Cluster-34894.61254,Cluster-34894.59881,Cluster-34894.63617
GO:0030658	transport vesicle membrane	cellular_component	0.11461	1	13	1654	296	49533	Cluster-29404.0,Cluster-34894.33419,Cluster-34894.26768,Cluster-34894.33082,Cluster-34894.81805,Cluster-34894.53919,Cluster-34894.13896,Cluster-34894.68037,Cluster-34894.34704,Cluster-34894.47996,Cluster-34894.32549,Cluster-34894.79362,Cluster-34894.79358
GO:0009890	negative regulation of biosynthetic process	biological_process	0.12074	1	9	1654	162	49533	Cluster-34894.71563,Cluster-34894.13664,Cluster-34894.98656,Cluster-34894.2329,Cluster-34894.101011,Cluster-34894.6241,Cluster-34894.17604,Cluster-19183.0,Cluster-34894.81610
GO:0051239	regulation of multicellular organismal process	biological_process	0.12181	1	11	1654	213	49533	Cluster-34894.59783,Cluster-34894.8480,Cluster-34894.60081,Cluster-34894.22770,Cluster-34894.8481,Cluster-34894.8479,Cluster-7665.0,Cluster-34894.60314,Cluster-34894.21275,Cluster-34894.53590,Cluster-34894.61954
GO:0046148	pigment biosynthetic process	biological_process	0.12255	1	7	1654	116	49533	Cluster-34894.61254,Cluster-34894.101694,Cluster-34894.82976,Cluster-34894.77308,Cluster-34894.61252,Cluster-34894.92197,Cluster-34894.37859
GO:0030990	intraciliary transport particle	cellular_component	0.12257	1	1	1654	3	49533	Cluster-34268.0
GO:0030991	intraciliary transport particle A	cellular_component	0.12257	1	1	1654	3	49533	Cluster-34268.0
GO:0015976	carbon utilization	biological_process	0.12258	1	5	1654	75	49533	Cluster-34894.29908,Cluster-34894.86397,Cluster-34894.41391,Cluster-34894.59881,Cluster-12597.1
GO:0006368	transcription elongation from RNA polymerase II promoter	biological_process	0.12349	1	6	1654	99	49533	Cluster-34894.24926,Cluster-34894.91000,Cluster-34894.101381,Cluster-34894.101380,Cluster-34894.69437,Cluster-34894.76815
GO:0006547	histidine metabolic process	biological_process	0.12452	1	4	1654	54	49533	Cluster-35241.0,Cluster-34894.6548,Cluster-34894.46259,Cluster-4270.2
GO:0052803	imidazole-containing compound metabolic process	biological_process	0.12452	1	4	1654	54	49533	Cluster-35241.0,Cluster-34894.6548,Cluster-34894.46259,Cluster-4270.2
GO:0019074	viral RNA genome packaging	biological_process	0.12467	1	1	1654	5	49533	Cluster-34894.13549
GO:0000139	Golgi membrane	cellular_component	0.12483	1	9	1654	165	49533	Cluster-34894.34704,Cluster-34894.32549,Cluster-29404.0,Cluster-34894.49352,Cluster-32401.0,Cluster-34894.101377,Cluster-34894.53919,Cluster-34894.13896,Cluster-34894.85012
GO:0030659	cytoplasmic vesicle membrane	cellular_component	0.12573	1	14	1654	325	49533	Cluster-29404.0,Cluster-34894.33419,Cluster-34894.26768,Cluster-34894.33082,Cluster-34894.81805,Cluster-34894.53919,Cluster-34894.13896,Cluster-34894.68037,Cluster-34894.34704,Cluster-34894.16252,Cluster-34894.47996,Cluster-34894.32549,Cluster-34894.79362,Cluster-34894.79358
GO:0031854	orexigenic neuropeptide QRFP receptor binding	molecular_function	0.12651	1	1	1654	3	49533	Cluster-34894.35213
GO:0001671	ATPase activator activity	molecular_function	0.12659	1	1	1654	4	49533	Cluster-34894.16208
GO:0000375	RNA splicing, via transesterification reactions	biological_process	0.12672	1	10	1654	200	49533	Cluster-34894.99031,Cluster-34894.102519,Cluster-34894.101047,Cluster-34894.71301,Cluster-34894.80154,Cluster-34894.25010,Cluster-34894.81648,Cluster-34894.22822,Cluster-34894.57548,Cluster-34894.81644
GO:0005788	endoplasmic reticulum lumen	cellular_component	0.12687	1	1	1654	3	49533	Cluster-34894.10964
GO:0016778	diphosphotransferase activity	molecular_function	0.12698	1	2	1654	15	49533	Cluster-34894.10810,Cluster-34894.98548
GO:0030150	protein import into mitochondrial matrix	biological_process	0.12731	1	3	1654	38	49533	Cluster-34894.29411,Cluster-34894.29410,Cluster-34894.15621
GO:0008284	positive regulation of cell proliferation	biological_process	0.12788	1	3	1654	35	49533	Cluster-7665.0,Cluster-34894.14094,Cluster-34894.53590
GO:0005543	phospholipid binding	molecular_function	0.13029	1	12	1654	224	49533	Cluster-34894.14495,Cluster-34894.99676,Cluster-34894.12139,Cluster-34894.96730,Cluster-34894.33039,Cluster-34894.73942,Cluster-34894.37790,Cluster-34894.32737,Cluster-34894.48340,Cluster-34894.74164,Cluster-34894.36582,Cluster-34894.90646
GO:0005780	extrinsic component of intraperoxisomal membrane	cellular_component	0.13057	1	1	1654	4	49533	Cluster-34894.57008
GO:0031312	extrinsic component of organelle membrane	cellular_component	0.13057	1	1	1654	4	49533	Cluster-34894.57008
GO:0045033	peroxisome inheritance	biological_process	0.13057	1	1	1654	4	49533	Cluster-34894.57008
GO:0004115	3',5'-cyclic-AMP phosphodiesterase activity	molecular_function	0.13064	1	1	1654	4	49533	Cluster-34894.46408
GO:0006195	purine nucleotide catabolic process	biological_process	0.13064	1	1	1654	4	49533	Cluster-34894.46408
GO:0006198	cAMP catabolic process	biological_process	0.13064	1	1	1654	4	49533	Cluster-34894.46408
GO:0009154	purine ribonucleotide catabolic process	biological_process	0.13064	1	1	1654	4	49533	Cluster-34894.46408
GO:0009261	ribonucleotide catabolic process	biological_process	0.13064	1	1	1654	4	49533	Cluster-34894.46408
GO:0072523	purine-containing compound catabolic process	biological_process	0.13064	1	1	1654	4	49533	Cluster-34894.46408
GO:0090066	regulation of anatomical structure size	biological_process	0.13093	1	7	1654	121	49533	Cluster-34894.77674,Cluster-34894.61954,Cluster-34894.8479,Cluster-34894.8480,Cluster-34894.8481,Cluster-34894.59783,Cluster-34894.43248
GO:0006568	tryptophan metabolic process	biological_process	0.13168	1	8	1654	142	49533	Cluster-34894.14416,Cluster-34894.42545,Cluster-34894.27841,Cluster-34894.61730,Cluster-34894.61252,Cluster-34894.96635,Cluster-34894.63617,Cluster-34894.61254
GO:0006586	indolalkylamine metabolic process	biological_process	0.13168	1	8	1654	142	49533	Cluster-34894.63617,Cluster-34894.61254,Cluster-34894.61252,Cluster-34894.96635,Cluster-34894.61730,Cluster-34894.27841,Cluster-34894.14416,Cluster-34894.42545
GO:0019684	photosynthesis, light reaction	biological_process	0.13235	1	5	1654	77	49533	Cluster-34894.87268,Cluster-34894.51890,Cluster-34894.30922,Cluster-34894.26738,Cluster-34894.14910
GO:0051188	cofactor biosynthetic process	biological_process	0.13309	1	28	1654	636	49533	Cluster-34894.61252,Cluster-29366.0,Cluster-16758.1,Cluster-34894.98548,Cluster-34894.61254,Cluster-34894.36035,Cluster-34894.54153,Cluster-34894.58364,Cluster-34894.64717,Cluster-34894.10810,Cluster-34894.63209,Cluster-34894.77308,Cluster-34894.8401,Cluster-34894.21131,Cluster-34894.101694,Cluster-34894.72801,Cluster-34894.29157,Cluster-34894.45376,Cluster-16718.0,Cluster-34894.76990,Cluster-348…
GO:0004612	phosphoenolpyruvate carboxykinase (ATP) activity	molecular_function	0.13318	1	1	1654	4	49533	Cluster-34894.41391
GO:0008849	enterochelin esterase activity	molecular_function	0.13337	1	1	1654	4	49533	Cluster-34894.51663
GO:0016881	acid-amino acid ligase activity	molecular_function	0.13354	1	6	1654	98	49533	Cluster-34894.86735,Cluster-34894.17292,Cluster-34894.22436,Cluster-34894.7571,Cluster-34894.98975,Cluster-34894.17293
GO:0000178	exosome (RNase complex)	cellular_component	0.13442	1	2	1654	17	49533	Cluster-34894.15887,Cluster-34894.46259
GO:0052636	arabinosyltransferase activity	molecular_function	0.13622	1	1	1654	4	49533	Cluster-34894.15556
GO:0071766	Actinobacterium-type cell wall biogenesis	biological_process	0.13622	1	1	1654	4	49533	Cluster-34894.15556
GO:0000790	nuclear chromatin	cellular_component	0.13783	1	1	1654	4	49533	Cluster-34894.76815
GO:0031011	Ino80 complex	cellular_component	0.13783	1	1	1654	4	49533	Cluster-34894.76815
GO:0097346	INO80-type complex	cellular_component	0.13783	1	1	1654	4	49533	Cluster-34894.76815
GO:0005741	mitochondrial outer membrane	cellular_component	0.13807	1	13	1654	273	49533	Cluster-34894.15621,Cluster-34894.99970,Cluster-34894.70529,Cluster-34894.102709,Cluster-34894.58468,Cluster-34894.95221,Cluster-34894.29410,Cluster-34894.29411,Cluster-34894.83060,Cluster-34894.57734,Cluster-34894.86738,Cluster-34894.94029,Cluster-34894.69959
GO:0031968	organelle outer membrane	cellular_component	0.13807	1	13	1654	273	49533	Cluster-34894.57734,Cluster-34894.86738,Cluster-34894.94029,Cluster-34894.69959,Cluster-34894.29411,Cluster-34894.29410,Cluster-34894.83060,Cluster-34894.58468,Cluster-34894.95221,Cluster-34894.70529,Cluster-34894.102709,Cluster-34894.99970,Cluster-34894.15621
GO:0043130	ubiquitin binding	molecular_function	0.13809	1	5	1654	73	49533	Cluster-34894.73942,Cluster-34894.17880,Cluster-34894.17882,Cluster-34894.23798,Cluster-34894.14495
GO:0042440	pigment metabolic process	biological_process	0.13881	1	8	1654	140	49533	Cluster-34894.109736,Cluster-34894.92197,Cluster-34894.82976,Cluster-34894.61254,Cluster-34894.101694,Cluster-34894.37859,Cluster-34894.61252,Cluster-34894.77308
GO:0001514	selenocysteine incorporation	biological_process	0.13911	1	2	1654	20	49533	Cluster-30483.0,Cluster-34894.44517
GO:0006451	translational readthrough	biological_process	0.13911	1	2	1654	20	49533	Cluster-34894.44517,Cluster-30483.0
GO:0006694	steroid biosynthetic process	biological_process	0.1402	1	6	1654	95	49533	Cluster-34894.61730,Cluster-34894.61254,Cluster-34894.10279,Cluster-34894.61733,Cluster-34894.61252,Cluster-34894.56369
GO:0032403	protein complex binding	molecular_function	0.14095	1	27	1654	624	49533	Cluster-34894.78560,Cluster-34894.105470,Cluster-34894.14312,Cluster-34894.79588,Cluster-34894.78905,Cluster-34894.21651,Cluster-34894.78553,Cluster-1082.0,Cluster-34894.78551,Cluster-34894.95921,Cluster-34894.96049,Cluster-34894.96476,Cluster-34894.52311,Cluster-34894.69939,Cluster-34894.66718,Cluster-34894.64041,Cluster-34894.79586,Cluster-22213.1,Cluster-34894.68407,Cluster-34894.36549,Cluster…
GO:0001101	response to acid chemical	biological_process	0.14251	1	3	1654	41	49533	Cluster-34894.29907,Cluster-34894.59585,Cluster-34894.29908
GO:0008745	N-acetylmuramoyl-L-alanine amidase activity	molecular_function	0.14349	1	1	1654	4	49533	Cluster-34894.18400
GO:0008234	cysteine-type peptidase activity	molecular_function	0.14507	1	20	1654	426	49533	Cluster-34894.63056,Cluster-34894.56264,Cluster-34894.53989,Cluster-34894.61808,Cluster-34894.77692,Cluster-34894.102709,Cluster-34894.91000,Cluster-34894.74284,Cluster-34894.31267,Cluster-34894.73604,Cluster-34894.49943,Cluster-34894.43803,Cluster-34894.64728,Cluster-34894.73861,Cluster-34894.67888,Cluster-34894.76305,Cluster-34894.72901,Cluster-34894.5681,Cluster-34894.12629,Cluster-34894.59928
GO:0000795	synaptonemal complex	cellular_component	0.14548	1	2	1654	18	49533	Cluster-34894.35213,Cluster-34894.15714
GO:0009986	cell surface	cellular_component	0.14669	1	4	1654	64	49533	Cluster-34894.97937,Cluster-34894.14783,Cluster-34894.14775,Cluster-34894.14774
GO:0004451	isocitrate lyase activity	molecular_function	0.14718	1	1	1654	5	49533	Cluster-34894.71967
GO:0098602	single organism cell adhesion	biological_process	0.14844	1	1	1654	6	49533	Cluster-34894.16252
GO:0000347	THO complex	cellular_component	0.14876	1	4	1654	59	49533	Cluster-34894.91000,Cluster-34894.45300,Cluster-34894.30338,Cluster-34894.69437
GO:0010033	response to organic substance	biological_process	0.14888	1	13	1654	267	49533	Cluster-34894.45429,Cluster-34894.60220,Cluster-34894.36935,Cluster-34894.84142,Cluster-34894.52963,Cluster-34894.59904,Cluster-34894.58638,Cluster-34894.81065,Cluster-34894.36671,Cluster-34894.45425,Cluster-34894.65312,Cluster-34894.73042,Cluster-34894.79362
GO:1990391	DNA repair complex	cellular_component	0.15181	1	2	1654	20	49533	Cluster-34894.75748,Cluster-34894.34704
GO:1901681	sulfur compound binding	molecular_function	0.15342	1	8	1654	144	49533	Cluster-34894.19108,Cluster-34894.76990,Cluster-34894.8057,Cluster-34894.62019,Cluster-34894.33579,Cluster-18299.0,Cluster-34894.72801,Cluster-34894.104028
GO:0016811	hydrolase activity, acting on carbon-nitrogen (but not peptide) bonds, in linear amides	molecular_function	0.15418	1	4	1654	60	49533	Cluster-34894.31774,Cluster-34894.110192,Cluster-34894.11016,Cluster-34894.18400
GO:0060966	regulation of gene silencing by RNA	biological_process	0.15554	1	1	1654	5	49533	Cluster-34894.78867
GO:0060967	negative regulation of gene silencing by RNA	biological_process	0.15554	1	1	1654	5	49533	Cluster-34894.78867
GO:0060968	regulation of gene silencing	biological_process	0.15554	1	1	1654	5	49533	Cluster-34894.78867
GO:0060969	negative regulation of gene silencing	biological_process	0.15554	1	1	1654	5	49533	Cluster-34894.78867
GO:0008190	eukaryotic initiation factor 4E binding	molecular_function	0.15692	1	2	1654	20	49533	Cluster-34894.98656,Cluster-34894.2329
GO:0045947	negative regulation of translational initiation	biological_process	0.15692	1	2	1654	20	49533	Cluster-34894.2329,Cluster-34894.98656
GO:0016627	oxidoreductase activity, acting on the CH-CH group of donors	molecular_function	0.15693	1	9	1654	167	49533	Cluster-34894.103235,Cluster-34894.77308,Cluster-34894.61252,Cluster-34894.101694,Cluster-34894.61254,Cluster-34894.16375,Cluster-34894.92197,Cluster-34894.96945,Cluster-34894.476
GO:0000159	protein phosphatase type 2A complex	cellular_component	0.1576	1	2	1654	19	49533	Cluster-34894.60187,Cluster-34894.60188
GO:0008601	protein phosphatase type 2A regulator activity	molecular_function	0.1576	1	2	1654	19	49533	Cluster-34894.60187,Cluster-34894.60188
GO:0005537	mannose binding	molecular_function	0.1579	1	1	1654	4	49533	Cluster-18299.0
GO:0016717	oxidoreductase activity, acting on paired donors, with oxidation of a pair of donors resulting in the reduction of molecular oxygen to two molecules of water	molecular_function	0.15797	1	1	1654	5	49533	Cluster-33830.1
GO:0019030	icosahedral viral capsid	cellular_component	0.15872	1	1	1654	4	49533	Cluster-34894.83943
GO:0017007	protein-bilin linkage	biological_process	0.16105	1	1	1654	6	49533	Cluster-34894.55487
GO:0017009	protein-phycocyanobilin linkage	biological_process	0.16105	1	1	1654	6	49533	Cluster-34894.55487
GO:0009252	peptidoglycan biosynthetic process	biological_process	0.16108	1	5	1654	84	49533	Cluster-34894.98975,Cluster-34894.17293,Cluster-34894.86735,Cluster-34894.17292,Cluster-34894.18400
GO:0006721	terpenoid metabolic process	biological_process	0.16172	1	5	1654	77	49533	Cluster-34894.61254,Cluster-34894.37859,Cluster-34894.61252,Cluster-34894.10279,Cluster-34894.92197
GO:0016114	terpenoid biosynthetic process	biological_process	0.16172	1	5	1654	77	49533	Cluster-34894.61254,Cluster-34894.61252,Cluster-34894.10279,Cluster-34894.92197,Cluster-34894.37859
GO:0000221	vacuolar proton-transporting V-type ATPase, V1 domain	cellular_component	0.16183	1	3	1654	37	49533	Cluster-34894.15898,Cluster-34894.40744,Cluster-34894.72073
GO:0016471	vacuolar proton-transporting V-type ATPase complex	cellular_component	0.16183	1	3	1654	37	49533	Cluster-34894.15898,Cluster-34894.72073,Cluster-34894.40744
GO:0034464	BBSome	cellular_component	0.16193	1	2	1654	20	49533	Cluster-34894.89565,Cluster-34894.33109
GO:0009451	RNA modification	biological_process	0.16258	1	19	1654	410	49533	Cluster-34894.41191,Cluster-34894.42954,Cluster-34894.63014,Cluster-34894.83089,Cluster-34894.81805,Cluster-34894.29132,Cluster-24315.0,Cluster-34894.81176,Cluster-34894.15343,Cluster-34894.50833,Cluster-34894.26752,Cluster-26628.0,Cluster-34894.92978,Cluster-34894.41687,Cluster-34894.95237,Cluster-34894.96990,Cluster-34894.15653,Cluster-34894.15344,Cluster-34894.41602
GO:0005773	vacuole	cellular_component	0.16265	1	4	1654	58	49533	Cluster-34894.15898,Cluster-34894.31028,Cluster-34894.40744,Cluster-34894.72073
GO:0016830	carbon-carbon lyase activity	molecular_function	0.16275	1	17	1654	387	49533	Cluster-34894.83331,Cluster-34894.59478,Cluster-34894.14337,Cluster-34894.41391,Cluster-34894.80043,Cluster-34894.66806,Cluster-34894.38742,Cluster-34894.71967,Cluster-34894.83329,Cluster-34894.62299,Cluster-28743.0,Cluster-34894.21131,Cluster-34894.43602,Cluster-34894.37600,Cluster-34894.87619,Cluster-34894.59866,Cluster-34894.35111
GO:0000956	nuclear-transcribed mRNA catabolic process	biological_process	0.16427	1	4	1654	65	49533	Cluster-34894.15887,Cluster-34894.93280,Cluster-34894.28879,Cluster-34894.15889
GO:0004497	monooxygenase activity	molecular_function	0.16491	1	6	1654	102	49533	Cluster-34894.10279,Cluster-34894.61252,Cluster-34894.81972,Cluster-34894.19990,Cluster-34894.65259,Cluster-34894.61254
GO:0008757	S-adenosylmethionine-dependent methyltransferase activity	molecular_function	0.16515	1	12	1654	237	49533	Cluster-34894.61974,Cluster-34894.96657,Cluster-34894.63399,Cluster-34894.7650,Cluster-34894.99221,Cluster-34894.75683,Cluster-34894.99970,Cluster-34894.7647,Cluster-34894.41191,Cluster-34894.42954,Cluster-34894.41687,Cluster-34894.63014
GO:0042559	pteridine-containing compound biosynthetic process	biological_process	0.16591	1	7	1654	128	49533	Cluster-34894.61730,Cluster-34894.95221,Cluster-34894.8401,Cluster-34894.98548,Cluster-16758.1,Cluster-16718.0,Cluster-34894.10810
GO:0008537	proteasome activator complex	cellular_component	0.16776	1	2	1654	21	49533	Cluster-34894.14910,Cluster-34894.34758
GO:0022624	proteasome accessory complex	cellular_component	0.16776	1	2	1654	21	49533	Cluster-34894.34758,Cluster-34894.14910
GO:0030688	preribosome, small subunit precursor	cellular_component	0.16835	1	1	1654	4	49533	Cluster-34894.58719
GO:0010109	regulation of photosynthesis	biological_process	0.16874	1	2	1654	19	49533	Cluster-34894.14910,Cluster-34894.87268
GO:0042548	regulation of photosynthesis, light reaction	biological_process	0.16874	1	2	1654	19	49533	Cluster-34894.87268,Cluster-34894.14910
GO:0042549	photosystem II stabilization	biological_process	0.16874	1	2	1654	19	49533	Cluster-34894.87268,Cluster-34894.14910
GO:0043467	regulation of generation of precursor metabolites and energy	biological_process	0.16874	1	2	1654	19	49533	Cluster-34894.87268,Cluster-34894.14910
GO:0045182	translation regulator activity	molecular_function	0.16922	1	1	1654	6	49533	Cluster-34894.18092
GO:0051341	regulation of oxidoreductase activity	biological_process	0.17	1	1	1654	6	49533	Cluster-34894.70840
GO:0051354	negative regulation of oxidoreductase activity	biological_process	0.17	1	1	1654	6	49533	Cluster-34894.70840
GO:1900757	regulation of D-amino-acid oxidase activity	biological_process	0.17	1	1	1654	6	49533	Cluster-34894.70840
GO:1900758	negative regulation of D-amino-acid oxidase activity	biological_process	0.17	1	1	1654	6	49533	Cluster-34894.70840
GO:0004531	deoxyribonuclease II activity	molecular_function	0.17079	1	1	1654	5	49533	Cluster-34345.0
GO:0016889	endodeoxyribonuclease activity, producing 3'-phosphomonoesters	molecular_function	0.17079	1	1	1654	5	49533	Cluster-34345.0
GO:0047661	amino-acid racemase activity	molecular_function	0.17155	1	1	1654	6	49533	Cluster-34894.47056
GO:0030120	vesicle coat	cellular_component	0.17177	1	13	1654	318	49533	Cluster-34894.79358,Cluster-34894.79362,Cluster-34894.32549,Cluster-34894.47996,Cluster-34894.34704,Cluster-34894.13896,Cluster-34894.68037,Cluster-34894.53919,Cluster-34894.33082,Cluster-34894.81805,Cluster-29404.0,Cluster-34894.26768,Cluster-34894.33419
GO:0030135	coated vesicle	cellular_component	0.17177	1	13	1654	318	49533	Cluster-34894.79362,Cluster-34894.32549,Cluster-34894.79358,Cluster-34894.34704,Cluster-34894.47996,Cluster-34894.53919,Cluster-34894.13896,Cluster-34894.68037,Cluster-29404.0,Cluster-34894.33419,Cluster-34894.26768,Cluster-34894.33082,Cluster-34894.81805
GO:0030662	coated vesicle membrane	cellular_component	0.17177	1	13	1654	318	49533	Cluster-34894.79358,Cluster-34894.32549,Cluster-34894.79362,Cluster-34894.47996,Cluster-34894.34704,Cluster-34894.13896,Cluster-34894.68037,Cluster-34894.53919,Cluster-34894.33082,Cluster-34894.81805,Cluster-29404.0,Cluster-34894.26768,Cluster-34894.33419
GO:0015643	toxic substance binding	molecular_function	0.17189	1	3	1654	44	49533	Cluster-34894.47835,Cluster-34894.50952,Cluster-34894.30879
GO:0045095	keratin filament	cellular_component	0.17198	1	2	1654	22	49533	Cluster-34894.78970,Cluster-34894.44960
GO:0017016	Ras GTPase binding	molecular_function	0.17206	1	6	1654	110	49533	Cluster-34894.19751,Cluster-34894.95778,Cluster-34894.67851,Cluster-34894.58030,Cluster-34894.66963,Cluster-34894.103764
GO:0031267	small GTPase binding	molecular_function	0.17206	1	6	1654	110	49533	Cluster-34894.67851,Cluster-34894.66963,Cluster-34894.103764,Cluster-34894.58030,Cluster-34894.19751,Cluster-34894.95778
GO:0051020	GTPase binding	molecular_function	0.17206	1	6	1654	110	49533	Cluster-34894.19751,Cluster-34894.95778,Cluster-34894.67851,Cluster-34894.58030,Cluster-34894.66963,Cluster-34894.103764
GO:0007596	blood coagulation	biological_process	0.17225	1	17	1654	389	49533	Cluster-34894.15713,Cluster-34894.17915,Cluster-34894.24432,Cluster-34894.22770,Cluster-34894.59925,Cluster-34894.22821,Cluster-34894.21275,Cluster-34894.60081,Cluster-34894.24264,Cluster-14514.0,Cluster-34894.60834,Cluster-34894.16182,Cluster-34894.17019,Cluster-34894.19751,Cluster-34894.45995,Cluster-34894.38829,Cluster-34894.15898
GO:0009415	response to water	biological_process	0.17278	1	2	1654	24	49533	Cluster-34894.29907,Cluster-34894.29908
GO:0006040	amino sugar metabolic process	biological_process	0.17335	1	5	1654	88	49533	Cluster-34894.59136,Cluster-34894.58271,Cluster-34894.44752,Cluster-34894.55056,Cluster-34894.29731
GO:0046655	folic acid metabolic process	biological_process	0.17433	1	5	1654	86	49533	Cluster-34894.10810,Cluster-16718.0,Cluster-34894.8401,Cluster-34894.98548,Cluster-34894.95221
GO:0046656	folic acid biosynthetic process	biological_process	0.17433	1	5	1654	86	49533	Cluster-34894.10810,Cluster-16718.0,Cluster-34894.8401,Cluster-34894.98548,Cluster-34894.95221
GO:0009522	photosystem I	cellular_component	0.17438	1	4	1654	68	49533	Cluster-34894.55013,Cluster-34894.54754,Cluster-34894.35505,Cluster-34894.46732
GO:0015556	C4-dicarboxylate transmembrane transporter activity	molecular_function	0.17571	1	1	1654	6	49533	Cluster-34894.19496
GO:0019867	outer membrane	cellular_component	0.17597	1	23	1654	547	49533	Cluster-34894.98322,Cluster-34894.79693,Cluster-34894.94029,Cluster-34894.69959,Cluster-34894.87268,Cluster-34894.15715,Cluster-34894.58468,Cluster-34894.95221,Cluster-34894.70529,Cluster-34894.36640,Cluster-34894.10810,Cluster-34894.16182,Cluster-34894.99970,Cluster-34894.29411,Cluster-34894.29410,Cluster-34894.83060,Cluster-34894.57734,Cluster-34894.86738,Cluster-34894.102709,Cluster-34894.7298…
GO:0042127	regulation of cell proliferation	biological_process	0.17654	1	3	1654	40	49533	Cluster-7665.0,Cluster-34894.53590,Cluster-34894.14094
GO:0005102	receptor binding	molecular_function	0.17764	1	59	1654	1542	49533	Cluster-34894.110458,Cluster-34894.29409,Cluster-20776.0,Cluster-34894.22821,Cluster-34894.59925,Cluster-34894.56107,Cluster-34894.16038,Cluster-34894.35213,Cluster-34894.99031,Cluster-34894.27736,Cluster-34894.5821,Cluster-30471.0,Cluster-34894.15713,Cluster-34894.15152,Cluster-34894.24432,Cluster-34894.101313,Cluster-34894.7359,Cluster-34894.30338,Cluster-35523.0,Cluster-30199.1,Cluster-34894.8…
GO:0042430	indole-containing compound metabolic process	biological_process	0.17823	1	8	1654	152	49533	Cluster-34894.96635,Cluster-34894.61252,Cluster-34894.61254,Cluster-34894.63617,Cluster-34894.42545,Cluster-34894.14416,Cluster-34894.61730,Cluster-34894.27841
GO:0004336	galactosylceramidase activity	molecular_function	0.17952	1	1	1654	5	49533	Cluster-34894.50285
GO:0006677	glycosylceramide metabolic process	biological_process	0.17952	1	1	1654	5	49533	Cluster-34894.50285
GO:0006681	galactosylceramide metabolic process	biological_process	0.17952	1	1	1654	5	49533	Cluster-34894.50285
GO:0006683	galactosylceramide catabolic process	biological_process	0.17952	1	1	1654	5	49533	Cluster-34894.50285
GO:0019374	galactolipid metabolic process	biological_process	0.17952	1	1	1654	5	49533	Cluster-34894.50285
GO:0019376	galactolipid catabolic process	biological_process	0.17952	1	1	1654	5	49533	Cluster-34894.50285
GO:0019377	glycolipid catabolic process	biological_process	0.17952	1	1	1654	5	49533	Cluster-34894.50285
GO:0030149	sphingolipid catabolic process	biological_process	0.17952	1	1	1654	5	49533	Cluster-34894.50285
GO:0046466	membrane lipid catabolic process	biological_process	0.17952	1	1	1654	5	49533	Cluster-34894.50285
GO:0046477	glycosylceramide catabolic process	biological_process	0.17952	1	1	1654	5	49533	Cluster-34894.50285
GO:0046479	glycosphingolipid catabolic process	biological_process	0.17952	1	1	1654	5	49533	Cluster-34894.50285
GO:0046514	ceramide catabolic process	biological_process	0.17952	1	1	1654	5	49533	Cluster-34894.50285
GO:0019028	viral capsid	cellular_component	0.1796	1	38	1654	934	49533	Cluster-34894.69959,Cluster-34894.19751,Cluster-34894.19407,Cluster-34894.95221,Cluster-34894.33109,Cluster-34894.27484,Cluster-34894.27247,Cluster-34894.68407,Cluster-34894.96312,Cluster-34894.64041,Cluster-34894.61988,Cluster-34894.18699,Cluster-34894.60834,Cluster-34894.37401,Cluster-34894.17880,Cluster-34894.13549,Cluster-34894.16182,Cluster-34894.14416,Cluster-34894.31116,Cluster-34894.99662…
GO:0009110	vitamin biosynthetic process	biological_process	0.18167	1	13	1654	278	49533	Cluster-34894.63209,Cluster-34894.10810,Cluster-34894.61252,Cluster-34894.8401,Cluster-34894.98548,Cluster-34894.61254,Cluster-34894.62299,Cluster-34894.45376,Cluster-34894.36035,Cluster-16718.0,Cluster-34894.95221,Cluster-34894.104963,Cluster-34894.64717
GO:0042364	water-soluble vitamin biosynthetic process	biological_process	0.18167	1	13	1654	278	49533	Cluster-34894.62299,Cluster-34894.61254,Cluster-34894.45376,Cluster-34894.10810,Cluster-34894.63209,Cluster-34894.61252,Cluster-34894.8401,Cluster-34894.98548,Cluster-34894.95221,Cluster-34894.104963,Cluster-34894.64717,Cluster-34894.36035,Cluster-16718.0
GO:0009611	response to wounding	biological_process	0.18203	1	20	1654	466	49533	Cluster-34894.21275,Cluster-34894.22821,Cluster-34894.59925,Cluster-34894.15713,Cluster-34894.82713,Cluster-34894.22770,Cluster-34894.24432,Cluster-34894.17915,Cluster-26774.0,Cluster-34894.15898,Cluster-34894.45995,Cluster-34894.38829,Cluster-34894.17019,Cluster-34894.19751,Cluster-14514.0,Cluster-34894.24264,Cluster-34894.60081,Cluster-34894.16182,Cluster-31952.0,Cluster-34894.60834
GO:0016569	covalent chromatin modification	biological_process	0.18314	1	5	1654	87	49533	Cluster-34894.7650,Cluster-34894.101808,Cluster-34894.7647,Cluster-34894.48561,Cluster-34894.63399
GO:0016570	histone modification	biological_process	0.18314	1	5	1654	87	49533	Cluster-34894.48561,Cluster-34894.63399,Cluster-34894.7647,Cluster-34894.101808,Cluster-34894.7650
GO:0016791	phosphatase activity	molecular_function	0.18339	1	29	1654	662	49533	Cluster-34894.14400,Cluster-34894.64976,Cluster-34894.99221,Cluster-34894.55487,Cluster-34894.11548,Cluster-34894.46732,Cluster-34894.12685,Cluster-34894.14399,Cluster-34894.57084,Cluster-34894.7700,Cluster-34894.73498,Cluster-36048.0,Cluster-34894.48533,Cluster-34894.17576,Cluster-34894.49674,Cluster-34894.96945,Cluster-34894.18076,Cluster-34894.14945,Cluster-34894.61859,Cluster-34894.87363,Clus…
GO:0017048	Rho GTPase binding	molecular_function	0.18358	1	4	1654	70	49533	Cluster-34894.66963,Cluster-34894.103764,Cluster-34894.58030,Cluster-34894.19751
GO:0005149	interleukin-1 receptor binding	molecular_function	0.18385	1	1	1654	6	49533	Cluster-34894.65879
GO:0045323	interleukin-1 receptor complex	cellular_component	0.18385	1	1	1654	6	49533	Cluster-34894.65879
GO:0017053	transcriptional repressor complex	cellular_component	0.18395	1	2	1654	22	49533	Cluster-34894.64900,Cluster-34894.74194
GO:0006023	aminoglycan biosynthetic process	biological_process	0.18434	1	7	1654	131	49533	Cluster-34894.55056,Cluster-34894.98975,Cluster-34894.17293,Cluster-34894.1649,Cluster-34894.18400,Cluster-34894.17292,Cluster-34894.86735
GO:0003978	UDP-glucose 4-epimerase activity	molecular_function	0.18593	1	1	1654	8	49533	Cluster-32090.1
GO:0010324	membrane invagination	biological_process	0.18609	1	1	1654	5	49533	Cluster-34894.31028
GO:0016237	microautophagy	biological_process	0.18609	1	1	1654	5	49533	Cluster-34894.31028
GO:0034448	EGO complex	cellular_component	0.18609	1	1	1654	5	49533	Cluster-34894.31028
GO:1902534	single-organism membrane invagination	biological_process	0.18609	1	1	1654	5	49533	Cluster-34894.31028
GO:0007167	enzyme linked receptor protein signaling pathway	biological_process	0.18614	1	8	1654	159	49533	Cluster-34894.78970,Cluster-34894.100797,Cluster-34894.81865,Cluster-34894.77939,Cluster-34894.100795,Cluster-34894.81805,Cluster-34894.90581,Cluster-34894.69855
GO:0031012	extracellular matrix	cellular_component	0.18632	1	16	1654	340	49533	Cluster-34894.7444,Cluster-34894.71321,Cluster-34894.7647,Cluster-34894.103973,Cluster-34894.11114,Cluster-34894.13380,Cluster-34894.7650,Cluster-34894.18055,Cluster-34894.46151,Cluster-18299.0,Cluster-34894.73562,Cluster-34894.101808,Cluster-34894.23317,Cluster-34894.52154,Cluster-34894.26268,Cluster-34894.101009
GO:0045892	negative regulation of transcription, DNA-templated	biological_process	0.1864	1	6	1654	107	49533	Cluster-34894.71563,Cluster-34894.13664,Cluster-34894.6241,Cluster-19183.0,Cluster-34894.81610,Cluster-34894.17604
GO:0051253	negative regulation of RNA metabolic process	biological_process	0.1864	1	6	1654	107	49533	Cluster-19183.0,Cluster-34894.81610,Cluster-34894.17604,Cluster-34894.6241,Cluster-34894.13664,Cluster-34894.71563
GO:1902679	negative regulation of RNA biosynthetic process	biological_process	0.1864	1	6	1654	107	49533	Cluster-19183.0,Cluster-34894.17604,Cluster-34894.81610,Cluster-34894.6241,Cluster-34894.13664,Cluster-34894.71563
GO:1903507	negative regulation of nucleic acid-templated transcription	biological_process	0.1864	1	6	1654	107	49533	Cluster-34894.71563,Cluster-19183.0,Cluster-34894.81610,Cluster-34894.17604,Cluster-34894.13664,Cluster-34894.6241
GO:0032266	phosphatidylinositol-3-phosphate binding	molecular_function	0.18644	1	2	1654	21	49533	Cluster-34894.73942,Cluster-34894.14495
GO:0009015	N-succinylarginine dihydrolase activity	molecular_function	0.18697	1	1	1654	6	49533	Cluster-34894.59484
GO:0010035	response to inorganic substance	biological_process	0.18704	1	5	1654	92	49533	Cluster-34894.59585,Cluster-34894.29907,Cluster-34894.64699,Cluster-34894.102233,Cluster-34894.29908
GO:0004820	glycine-tRNA ligase activity	molecular_function	0.19109	1	1	1654	6	49533	Cluster-34894.99967
GO:0006426	glycyl-tRNA aminoacylation	biological_process	0.19109	1	1	1654	6	49533	Cluster-34894.99967
GO:0009345	glycine-tRNA ligase complex	cellular_component	0.19109	1	1	1654	6	49533	Cluster-34894.99967
GO:0008202	steroid metabolic process	biological_process	0.19225	1	6	1654	106	49533	Cluster-34894.61733,Cluster-34894.10279,Cluster-34894.61252,Cluster-34894.56369,Cluster-34894.61730,Cluster-34894.61254
GO:0007052	mitotic spindle organization	biological_process	0.19551	1	2	1654	24	49533	Cluster-34894.99254,Cluster-34894.19751
GO:0000280	nuclear division	biological_process	0.19696	1	14	1654	318	49533	Cluster-34894.28931,Cluster-34894.16182,Cluster-34894.15714,Cluster-34894.25747,Cluster-34894.96049,Cluster-34894.60277,Cluster-34894.99254,Cluster-34894.58726,Cluster-34894.76815,Cluster-34894.35213,Cluster-34894.61660,Cluster-34894.72501,Cluster-34894.96657,Cluster-34894.19751
GO:0005294	neutral L-amino acid secondary active transmembrane transporter activity	molecular_function	0.19797	1	1	1654	6	49533	Cluster-34894.47234
GO:0015175	neutral amino acid transmembrane transporter activity	molecular_function	0.19797	1	1	1654	6	49533	Cluster-34894.47234
GO:0015655	alanine:sodium symporter activity	molecular_function	0.19797	1	1	1654	6	49533	Cluster-34894.47234
GO:0015804	neutral amino acid transport	biological_process	0.19797	1	1	1654	6	49533	Cluster-34894.47234
GO:0022858	alanine transmembrane transporter activity	molecular_function	0.19797	1	1	1654	6	49533	Cluster-34894.47234
GO:0032328	alanine transport	biological_process	0.19797	1	1	1654	6	49533	Cluster-34894.47234
GO:0008061	chitin binding	molecular_function	0.19869	1	4	1654	76	49533	Cluster-34894.44752,Cluster-34894.58271,Cluster-34894.59136,Cluster-34894.29731
GO:0006354	DNA-templated transcription, elongation	biological_process	0.19917	1	6	1654	114	49533	Cluster-34894.24926,Cluster-34894.91000,Cluster-34894.101381,Cluster-34894.101380,Cluster-34894.69437,Cluster-34894.76815
GO:0030248	cellulose binding	molecular_function	0.20117	1	2	1654	23	49533	Cluster-34894.17060,Cluster-18299.0
GO:0044421	extracellular region part	cellular_component	0.2036	1	36	1654	882	49533	Cluster-34894.18055,Cluster-34894.15898,Cluster-34894.46151,Cluster-34894.45995,Cluster-34894.38829,Cluster-34894.7650,Cluster-34894.19751,Cluster-34894.13380,Cluster-34894.16182,Cluster-34894.60834,Cluster-34894.7647,Cluster-14514.0,Cluster-34894.21275,Cluster-36750.0,Cluster-34894.57548,Cluster-34894.23317,Cluster-34894.53989,Cluster-34894.92237,Cluster-34894.89318,Cluster-34894.17019,Cluster-3…
GO:0098799	outer mitochondrial membrane protein complex	cellular_component	0.2038	1	6	1654	116	49533	Cluster-34894.15621,Cluster-34894.86738,Cluster-34894.83060,Cluster-34894.29410,Cluster-34894.29411,Cluster-34894.70529
GO:0042578	phosphoric ester hydrolase activity	molecular_function	0.20382	1	36	1654	859	49533	Cluster-34894.39771,Cluster-34894.62878,Cluster-34894.69077,Cluster-34894.70803,Cluster-34894.14402,Cluster-34894.18076,Cluster-34894.21450,Cluster-34894.12685,Cluster-34894.57084,Cluster-36048.0,Cluster-34894.89022,Cluster-34894.104654,Cluster-34894.14400,Cluster-34894.99221,Cluster-34894.46732,Cluster-34894.57083,Cluster-34894.14398,Cluster-34894.11431,Cluster-34894.11396,Cluster-34894.66553,Cl…
GO:0008200	ion channel inhibitor activity	molecular_function	0.20411	1	10	1654	218	49533	Cluster-34894.28001,Cluster-34894.64310,Cluster-34894.100797,Cluster-34300.0,Cluster-34894.66808,Cluster-34894.85513,Cluster-34894.56941,Cluster-34894.88440,Cluster-34894.63090,Cluster-34894.67139
GO:0016248	channel inhibitor activity	molecular_function	0.20411	1	10	1654	218	49533	Cluster-34300.0,Cluster-34894.66808,Cluster-34894.85513,Cluster-34894.28001,Cluster-34894.100797,Cluster-34894.64310,Cluster-34894.67139,Cluster-34894.56941,Cluster-34894.88440,Cluster-34894.63090
GO:0098588	bounding membrane of organelle	cellular_component	0.20413	1	51	1654	1353	49533	Cluster-29404.0,Cluster-34894.33419,Cluster-34894.60277,Cluster-34894.67141,Cluster-34894.72073,Cluster-34894.29410,Cluster-34894.93780,Cluster-34894.47996,Cluster-34894.83060,Cluster-34894.57008,Cluster-34894.32549,Cluster-34894.79358,Cluster-34894.70529,Cluster-34894.81805,Cluster-34894.99970,Cluster-34894.49047,Cluster-34894.13896,Cluster-34894.68037,Cluster-25024.0,Cluster-34894.40744,Cluster…
GO:0043248	proteasome assembly	biological_process	0.20414	1	3	1654	43	49533	Cluster-34894.72073,Cluster-34894.40744,Cluster-34894.7841
GO:0044038	cell wall macromolecule biosynthetic process	biological_process	0.20475	1	5	1654	92	49533	Cluster-34894.18400,Cluster-34894.86735,Cluster-34894.17292,Cluster-34894.17293,Cluster-34894.98975
GO:0070589	cellular component macromolecule biosynthetic process	biological_process	0.20475	1	5	1654	92	49533	Cluster-34894.18400,Cluster-34894.86735,Cluster-34894.17292,Cluster-34894.17293,Cluster-34894.98975
GO:0009654	photosystem II oxygen evolving complex	cellular_component	0.20638	1	2	1654	25	49533	Cluster-34894.87268,Cluster-34894.81166
GO:1990542	mitochondrial transmembrane transport	biological_process	0.2069	1	3	1654	47	49533	Cluster-34894.29410,Cluster-34894.29411,Cluster-34894.15621
GO:0001816	cytokine production	biological_process	0.20753	1	2	1654	24	49533	Cluster-7665.0,Cluster-34894.53590
GO:0001817	regulation of cytokine production	biological_process	0.20753	1	2	1654	24	49533	Cluster-34894.53590,Cluster-7665.0
GO:0001819	positive regulation of cytokine production	biological_process	0.20753	1	2	1654	24	49533	Cluster-34894.53590,Cluster-7665.0
GO:0019082	viral protein processing	biological_process	0.20964	1	3	1654	43	49533	Cluster-34894.89318,Cluster-34894.41361,Cluster-34894.14125
GO:0032259	methylation	biological_process	0.20979	1	12	1654	251	49533	Cluster-24315.0,Cluster-34894.7650,Cluster-34894.63399,Cluster-34894.96657,Cluster-34894.74878,Cluster-34894.61974,Cluster-34894.41687,Cluster-34894.41191,Cluster-34894.7647,Cluster-34894.99970,Cluster-34894.75683,Cluster-34894.99221
GO:0006522	alanine metabolic process	biological_process	0.21091	1	4	1654	66	49533	Cluster-34894.86735,Cluster-34894.17292,Cluster-34894.98975,Cluster-34894.17293
GO:0009078	pyruvate family amino acid metabolic process	biological_process	0.21091	1	4	1654	66	49533	Cluster-34894.98975,Cluster-34894.17293,Cluster-34894.17292,Cluster-34894.86735
GO:0030158	protein xylosyltransferase activity	molecular_function	0.21196	1	1	1654	7	49533	Cluster-34894.1649
GO:0035252	UDP-xylosyltransferase activity	molecular_function	0.21196	1	1	1654	7	49533	Cluster-34894.1649
GO:0042285	xylosyltransferase activity	molecular_function	0.21196	1	1	1654	7	49533	Cluster-34894.1649
GO:0044422	organelle part	cellular_component	0.21217	1	206	1654	5749	49533	Cluster-34894.96657,Cluster-34894.21275,Cluster-34894.58726,Cluster-34894.79362,Cluster-34894.89700,Cluster-34894.78560,Cluster-34894.89204,Cluster-34894.79588,Cluster-34894.85012,Cluster-34894.78551,Cluster-34894.33968,Cluster-16853.1,Cluster-34894.19751,Cluster-34894.45539,Cluster-34894.64041,Cluster-34894.72119,Cluster-34894.31028,Cluster-34894.51934,Cluster-34894.36187,Cluster-34894.5705,Clus…
GO:0006413	translational initiation	biological_process	0.21356	1	9	1654	194	49533	Cluster-34894.53349,Cluster-34894.98656,Cluster-34894.7298,Cluster-34894.93414,Cluster-34894.101011,Cluster-34894.2329,Cluster-34894.54655,Cluster-34894.17406,Cluster-34894.104224
GO:0006405	RNA export from nucleus	biological_process	0.21366	1	4	1654	71	49533	Cluster-34894.91000,Cluster-34894.75421,Cluster-34894.69437,Cluster-34894.80202
GO:0005615	extracellular space	cellular_component	0.21435	1	26	1654	630	49533	Cluster-34894.60278,Cluster-34894.24264,Cluster-14514.0,Cluster-34894.60834,Cluster-34894.16182,Cluster-34894.14125,Cluster-34894.19751,Cluster-34894.17019,Cluster-34894.45995,Cluster-34894.38829,Cluster-34894.15898,Cluster-34894.89318,Cluster-34894.92237,Cluster-34894.15713,Cluster-34894.53989,Cluster-34894.66229,Cluster-34894.57548,Cluster-34894.96049,Cluster-34894.17915,Cluster-34894.24432,Clu…
GO:0016810	hydrolase activity, acting on carbon-nitrogen (but not peptide) bonds	molecular_function	0.21457	1	9	1654	188	49533	Cluster-34894.11016,Cluster-34894.97414,Cluster-34894.2329,Cluster-34894.110192,Cluster-34894.18400,Cluster-34894.99918,Cluster-34894.31774,Cluster-34894.36549,Cluster-34894.59484
GO:0004329	formate-tetrahydrofolate ligase activity	molecular_function	0.21462	1	1	1654	6	49533	Cluster-16758.1
GO:0072348	sulfur compound transport	biological_process	0.21617	1	3	1654	47	49533	Cluster-23506.0,Cluster-34894.50774,Cluster-34894.88450
GO:0019784	NEDD8-specific protease activity	molecular_function	0.21967	1	1	1654	6	49533	Cluster-34894.61808
GO:0039693	viral DNA genome replication	biological_process	0.21967	1	1	1654	6	49533	Cluster-34894.61808
GO:0044034	multi-organism biosynthetic process	biological_process	0.21967	1	1	1654	6	49533	Cluster-34894.61808
GO:0005343	organic acid:sodium symporter activity	molecular_function	0.2198	1	2	1654	23	49533	Cluster-34894.47234,Cluster-34894.15804
GO:0015296	anion:cation symporter activity	molecular_function	0.2198	1	2	1654	23	49533	Cluster-34894.15804,Cluster-34894.47234
GO:0005811	lipid particle	cellular_component	0.2202	1	2	1654	24	49533	Cluster-34894.35044,Cluster-34894.61974
GO:0012511	monolayer-surrounded lipid storage body	cellular_component	0.2202	1	2	1654	24	49533	Cluster-34894.61974,Cluster-34894.35044
GO:0000270	peptidoglycan metabolic process	biological_process	0.22074	1	5	1654	94	49533	Cluster-34894.98975,Cluster-34894.17293,Cluster-34894.18400,Cluster-34894.17292,Cluster-34894.86735
GO:0005523	tropomyosin binding	molecular_function	0.22084	1	1	1654	6	49533	Cluster-34894.43248
GO:0051694	pointed-end actin filament capping	biological_process	0.22084	1	1	1654	6	49533	Cluster-34894.43248
GO:0016831	carboxy-lyase activity	molecular_function	0.22171	1	14	1654	329	49533	Cluster-34894.59478,Cluster-34894.14337,Cluster-34894.41391,Cluster-34894.83331,Cluster-34894.38742,Cluster-34894.62299,Cluster-34894.83329,Cluster-28743.0,Cluster-34894.80043,Cluster-34894.43602,Cluster-34894.37600,Cluster-34894.66806,Cluster-34894.59866,Cluster-34894.35111
GO:0003713	transcription coactivator activity	molecular_function	0.22206	1	3	1654	43	49533	Cluster-34894.43248,Cluster-34894.35421,Cluster-34894.50596
GO:0006779	porphyrin-containing compound biosynthetic process	biological_process	0.22223	1	6	1654	113	49533	Cluster-34894.92197,Cluster-34894.82976,Cluster-34894.61252,Cluster-34894.77308,Cluster-34894.101694,Cluster-34894.61254
GO:0030154	cell differentiation	biological_process	0.2232	1	17	1654	382	49533	Cluster-34894.71244,Cluster-34894.96944,Cluster-34894.63685,Cluster-26495.0,Cluster-34894.83200,Cluster-34894.66017,Cluster-34894.56941,Cluster-34894.78551,Cluster-34894.44809,Cluster-34894.64754,Cluster-34894.31620,Cluster-34894.82713,Cluster-34894.10279,Cluster-37016.0,Cluster-34894.35044,Cluster-34894.62381,Cluster-34894.62000
GO:0042173	regulation of sporulation resulting in formation of a cellular spore	biological_process	0.22409	1	1	1654	8	49533	Cluster-34894.31620
GO:0043937	regulation of sporulation	biological_process	0.22409	1	1	1654	8	49533	Cluster-34894.31620
GO:0006024	glycosaminoglycan biosynthetic process	biological_process	0.22454	1	6	1654	117	49533	Cluster-34894.98975,Cluster-34894.17293,Cluster-34894.1649,Cluster-34894.86735,Cluster-34894.17292,Cluster-34894.18400
GO:0005516	calmodulin binding	molecular_function	0.22505	1	5	1654	88	49533	Cluster-34894.49717,Cluster-18203.0,Cluster-15271.0,Cluster-34894.85885,Cluster-34894.63685
GO:0033180	proton-transporting V-type ATPase, V1 domain	cellular_component	0.22558	1	3	1654	44	49533	Cluster-34894.15898,Cluster-34894.72073,Cluster-34894.40744
GO:0007599	hemostasis	biological_process	0.22572	1	17	1654	408	49533	Cluster-34894.15898,Cluster-34894.17019,Cluster-34894.19751,Cluster-34894.45995,Cluster-34894.38829,Cluster-14514.0,Cluster-34894.60081,Cluster-34894.24264,Cluster-34894.16182,Cluster-34894.60834,Cluster-34894.21275,Cluster-34894.22821,Cluster-34894.59925,Cluster-34894.15713,Cluster-34894.24432,Cluster-34894.22770,Cluster-34894.17915
GO:0050817	coagulation	biological_process	0.22572	1	17	1654	408	49533	Cluster-34894.15713,Cluster-34894.17915,Cluster-34894.24432,Cluster-34894.22770,Cluster-34894.59925,Cluster-34894.21275,Cluster-34894.22821,Cluster-34894.60081,Cluster-34894.24264,Cluster-14514.0,Cluster-34894.60834,Cluster-34894.16182,Cluster-34894.19751,Cluster-34894.17019,Cluster-34894.45995,Cluster-34894.38829,Cluster-34894.15898
GO:0050878	regulation of body fluid levels	biological_process	0.22572	1	17	1654	408	49533	Cluster-34894.22821,Cluster-34894.21275,Cluster-34894.59925,Cluster-34894.15713,Cluster-34894.24432,Cluster-34894.22770,Cluster-34894.17915,Cluster-34894.15898,Cluster-34894.17019,Cluster-34894.19751,Cluster-34894.38829,Cluster-34894.45995,Cluster-14514.0,Cluster-34894.60081,Cluster-34894.24264,Cluster-34894.16182,Cluster-34894.60834
GO:0008813	chorismate lyase activity	molecular_function	0.22596	1	1	1654	7	49533	Cluster-34894.21131
GO:0008455	alpha-1,6-mannosylglycoprotein 2-beta-N-acetylglucosaminyltransferase activity	molecular_function	0.22626	1	1	1654	7	49533	Cluster-34894.52934
GO:0006261	DNA-dependent DNA replication	biological_process	0.22661	1	17	1654	395	49533	Cluster-34894.43602,Cluster-34894.45002,Cluster-34894.50863,Cluster-34894.64310,Cluster-34894.78959,Cluster-34894.40392,Cluster-34894.44517,Cluster-34894.105123,Cluster-34894.57201,Cluster-34894.58019,Cluster-34894.83423,Cluster-34894.63014,Cluster-34894.76815,Cluster-34894.50527,Cluster-34894.93780,Cluster-34894.58120,Cluster-34894.61808
GO:0043650	dicarboxylic acid biosynthetic process	biological_process	0.22855	1	5	1654	95	49533	Cluster-34894.95221,Cluster-34894.10810,Cluster-16718.0,Cluster-34894.8401,Cluster-34894.98548
GO:0044281	small molecule metabolic process	biological_process	0.22981	1	192	1654	5326	49533	Cluster-34894.61252,Cluster-34894.53989,Cluster-34894.50918,Cluster-34894.27832,Cluster-34894.31620,Cluster-34894.21450,Cluster-34894.86559,Cluster-34894.16716,Cluster-34894.96657,Cluster-34894.56369,Cluster-34894.110192,Cluster-34894.58719,Cluster-34894.92759,Cluster-34894.47040,Cluster-34894.51934,Cluster-34894.59983,Cluster-34894.51231,Cluster-34894.29157,Cluster-34894.36187,Cluster-34894.3396…
GO:0016813	hydrolase activity, acting on carbon-nitrogen (but not peptide) bonds, in linear amidines	molecular_function	0.22993	1	2	1654	25	49533	Cluster-34894.59484,Cluster-34894.2329
GO:0009982	pseudouridine synthase activity	molecular_function	0.22999	1	2	1654	25	49533	Cluster-34894.83089,Cluster-34894.81805
GO:0042060	wound healing	biological_process	0.23105	1	19	1654	458	49533	Cluster-34894.82713,Cluster-34894.15713,Cluster-34894.24432,Cluster-34894.22770,Cluster-26774.0,Cluster-34894.17915,Cluster-34894.21275,Cluster-34894.22821,Cluster-34894.59925,Cluster-14514.0,Cluster-34894.60081,Cluster-34894.24264,Cluster-34894.16182,Cluster-34894.60834,Cluster-34894.15898,Cluster-34894.19751,Cluster-34894.17019,Cluster-34894.38829,Cluster-34894.45995
GO:0035303	regulation of dephosphorylation	biological_process	0.23162	1	2	1654	26	49533	Cluster-34894.54542,Cluster-34894.49745
GO:0035304	regulation of protein dephosphorylation	biological_process	0.23162	1	2	1654	26	49533	Cluster-34894.54542,Cluster-34894.49745
GO:0006231	dTMP biosynthetic process	biological_process	0.23184	1	1	1654	8	49533	Cluster-34894.17808
GO:0042083	5,10-methylenetetrahydrofolate-dependent methyltransferase activity	molecular_function	0.23184	1	1	1654	8	49533	Cluster-34894.17808
GO:0046073	dTMP metabolic process	biological_process	0.23184	1	1	1654	8	49533	Cluster-34894.17808
GO:0004867	serine-type endopeptidase inhibitor activity	molecular_function	0.23206	1	7	1654	141	49533	Cluster-34894.40228,Cluster-34894.53632,Cluster-34894.18176,Cluster-34894.55757,Cluster-31952.0,Cluster-34894.55758,Cluster-34894.20041
GO:0044446	intracellular organelle part	cellular_component	0.23206	1	203	1654	5688	49533	Cluster-34894.11265,Cluster-34894.15621,Cluster-34894.92978,Cluster-34894.36612,Cluster-34894.95237,Cluster-34894.13287,Cluster-34894.70803,Cluster-34894.72213,Cluster-34894.86738,Cluster-34894.58896,Cluster-34894.14416,Cluster-34894.29411,Cluster-34894.57438,Cluster-34894.37401,Cluster-34894.49352,Cluster-34894.64310,Cluster-34894.17296,Cluster-34894.69959,Cluster-34894.35796,Cluster-34894.57202…
GO:0009452	7-methylguanosine RNA capping	biological_process	0.23251	1	3	1654	45	49533	Cluster-34894.42954,Cluster-24315.0,Cluster-34894.15239
GO:0036260	RNA capping	biological_process	0.23251	1	3	1654	45	49533	Cluster-24315.0,Cluster-34894.42954,Cluster-34894.15239
GO:0046168	glycerol-3-phosphate catabolic process	biological_process	0.23456	1	2	1654	26	49533	Cluster-34894.61252,Cluster-34894.61254
GO:0005310	dicarboxylic acid transmembrane transporter activity	molecular_function	0.23623	1	2	1654	25	49533	Cluster-34894.15804,Cluster-34894.19496
GO:0005507	copper ion binding	molecular_function	0.23665	1	8	1654	169	49533	Cluster-34894.81977,Cluster-29366.0,Cluster-36750.0,Cluster-34894.64699,Cluster-34894.35796,Cluster-34894.99559,Cluster-34894.60304,Cluster-34894.100752
GO:0009214	cyclic nucleotide catabolic process	biological_process	0.23868	1	1	1654	7	49533	Cluster-34894.46408
GO:0016855	racemase and epimerase activity, acting on amino acids and derivatives	molecular_function	0.23888	1	1	1654	8	49533	Cluster-34894.47056
GO:0036361	racemase activity, acting on amino acids and derivatives	molecular_function	0.23888	1	1	1654	8	49533	Cluster-34894.47056
GO:0005577	fibrinogen complex	cellular_component	0.23949	1	15	1654	361	49533	Cluster-34894.15898,Cluster-34894.19751,Cluster-34894.17019,Cluster-34894.45995,Cluster-34894.38829,Cluster-34894.21275,Cluster-34894.22821,Cluster-34894.59925,Cluster-14514.0,Cluster-34894.24264,Cluster-34894.15713,Cluster-34894.24432,Cluster-34894.16182,Cluster-34894.60834,Cluster-34894.17915
GO:0030168	platelet activation	biological_process	0.23949	1	15	1654	361	49533	Cluster-34894.60834,Cluster-34894.17915,Cluster-34894.16182,Cluster-34894.24432,Cluster-34894.24264,Cluster-34894.15713,Cluster-14514.0,Cluster-34894.59925,Cluster-34894.21275,Cluster-34894.22821,Cluster-34894.17019,Cluster-34894.19751,Cluster-34894.45995,Cluster-34894.38829,Cluster-34894.15898
GO:0008677	2-dehydropantoate 2-reductase activity	molecular_function	0.23959	1	2	1654	25	49533	Cluster-34894.61252,Cluster-34894.61254
GO:0006468	protein phosphorylation	biological_process	0.24052	1	60	1654	1507	49533	Cluster-34894.35505,Cluster-34894.8253,Cluster-19093.0,Cluster-34894.99221,Cluster-34894.19751,Cluster-34894.29020,Cluster-34894.62945,Cluster-34894.34030,Cluster-34894.24583,Cluster-34894.27484,Cluster-34894.30583,Cluster-34894.82882,Cluster-17055.1,Cluster-34894.22526,Cluster-34894.70508,Cluster-34894.69855,Cluster-34894.27832,Cluster-34894.75683,Cluster-34894.37325,Cluster-34894.97670,Cluster-…
GO:0051168	nuclear export	biological_process	0.24132	1	4	1654	75	49533	Cluster-34894.91000,Cluster-34894.80202,Cluster-34894.75421,Cluster-34894.69437
GO:0000003	reproduction	biological_process	0.24175	1	26	1654	647	49533	Cluster-34894.87626,Cluster-34894.45995,Cluster-34894.48898,Cluster-34894.72501,Cluster-19252.0,Cluster-34894.70309,Cluster-34894.51934,Cluster-34894.80873,Cluster-34894.15712,Cluster-34894.35116,Cluster-34894.25747,Cluster-34894.16182,Cluster-34894.28931,Cluster-34894.52779,Cluster-34894.10023,Cluster-34894.15710,Cluster-34894.59925,Cluster-34894.69077,Cluster-34894.35213,Cluster-34894.76815,Clu…
GO:0017006	protein-tetrapyrrole linkage	biological_process	0.24236	1	1	1654	9	49533	Cluster-34894.55487
GO:0009615	response to virus	biological_process	0.24329	1	9	1654	206	49533	Cluster-34894.59586,Cluster-16764.0,Cluster-34894.51497,Cluster-34894.59587,Cluster-34894.58314,Cluster-34894.16182,Cluster-26774.0,Cluster-34894.56478,Cluster-18299.0
GO:0044255	cellular lipid metabolic process	biological_process	0.24374	1	37	1654	902	49533	Cluster-34894.42545,Cluster-32090.1,Cluster-36520.1,Cluster-12597.1,Cluster-34894.58719,Cluster-34894.17294,Cluster-34894.92759,Cluster-34894.83423,Cluster-34894.51231,Cluster-34894.50285,Cluster-34894.58093,Cluster-34894.60314,Cluster-34894.56266,Cluster-34894.13879,Cluster-34894.77888,Cluster-34894.61252,Cluster-34894.53949,Cluster-34894.76650,Cluster-34894.61254,Cluster-34894.92197,Cluster-348…
GO:0006824	cobalt ion transport	biological_process	0.24389	1	1	1654	7	49533	Cluster-34894.62299
GO:0015087	cobalt ion transmembrane transporter activity	molecular_function	0.24389	1	1	1654	7	49533	Cluster-34894.62299
GO:0000090	mitotic anaphase	biological_process	0.2449	1	3	1654	53	49533	Cluster-34894.16182,Cluster-34894.96049,Cluster-34894.19751
GO:0051322	anaphase	biological_process	0.2449	1	3	1654	53	49533	Cluster-34894.19751,Cluster-34894.16182,Cluster-34894.96049
GO:0008242	omega peptidase activity	molecular_function	0.24507	1	2	1654	25	49533	Cluster-34894.56264,Cluster-34894.67888
GO:0045156	electron transporter, transferring electrons within the cyclic electron transport pathway of photosynthesis activity	molecular_function	0.24581	1	2	1654	28	49533	Cluster-34894.51890,Cluster-34894.30922
GO:0046688	response to copper ion	biological_process	0.24604	1	1	1654	9	49533	Cluster-34894.64699
GO:0030667	secretory granule membrane	cellular_component	0.24886	1	1	1654	7	49533	Cluster-34894.16252
GO:0006270	DNA replication initiation	biological_process	0.25009	1	12	1654	276	49533	Cluster-34894.58120,Cluster-34894.57201,Cluster-34894.58019,Cluster-34894.83423,Cluster-34894.43602,Cluster-34894.45002,Cluster-34894.76815,Cluster-34894.50863,Cluster-34894.50527,Cluster-34894.78959,Cluster-34894.93780,Cluster-34894.105123
GO:0000725	recombinational repair	biological_process	0.25018	1	2	1654	27	49533	Cluster-34894.75748,Cluster-34894.34704
GO:0044711	single-organism biosynthetic process	biological_process	0.25051	1	85	1654	2264	49533	Cluster-34894.13879,Cluster-34894.58364,Cluster-34894.77888,Cluster-34894.56369,Cluster-34894.60314,Cluster-34894.36035,Cluster-34894.58093,Cluster-34894.41391,Cluster-34894.50918,Cluster-34894.61252,Cluster-34894.95221,Cluster-12597.1,Cluster-8208.0,Cluster-34894.48364,Cluster-16718.0,Cluster-34894.33968,Cluster-34894.51231,Cluster-34894.29157,Cluster-34894.92759,Cluster-34894.63209,Cluster-3489…
GO:1901981	phosphatidylinositol phosphate binding	molecular_function	0.25189	1	2	1654	25	49533	Cluster-34894.73942,Cluster-34894.14495
GO:0090307	mitotic spindle assembly	biological_process	0.25199	1	1	1654	7	49533	Cluster-34894.99254
GO:1902850	microtubule cytoskeleton organization involved in mitosis	biological_process	0.25199	1	1	1654	7	49533	Cluster-34894.99254
GO:0006099	tricarboxylic acid cycle	biological_process	0.25227	1	3	1654	47	49533	Cluster-34894.59881,Cluster-34894.29908,Cluster-34894.41391
GO:0006101	citrate metabolic process	biological_process	0.25227	1	3	1654	47	49533	Cluster-34894.59881,Cluster-34894.41391,Cluster-34894.29908
GO:0005199	structural constituent of cell wall	molecular_function	0.25313	1	1	1654	10	49533	Cluster-34894.31051
GO:0008272	sulfate transport	biological_process	0.25377	1	2	1654	29	49533	Cluster-34894.50774,Cluster-23506.0
GO:0015116	sulfate transmembrane transporter activity	molecular_function	0.25377	1	2	1654	29	49533	Cluster-34894.50774,Cluster-23506.0
GO:0000154	rRNA modification	biological_process	0.25452	1	3	1654	47	49533	Cluster-34894.63014,Cluster-34894.41687,Cluster-34894.41191
GO:0004420	hydroxymethylglutaryl-CoA reductase (NADPH) activity	molecular_function	0.25551	1	1	1654	8	49533	Cluster-34894.56369
GO:0030983	mismatched DNA binding	molecular_function	0.25627	1	3	1654	52	49533	Cluster-34894.41957,Cluster-34894.27841,Cluster-34894.93597
GO:0004488	methylenetetrahydrofolate dehydrogenase (NADP+) activity	molecular_function	0.25681	1	2	1654	26	49533	Cluster-16758.1,Cluster-34894.61730
GO:0003008	system process	biological_process	0.25694	1	9	1654	203	49533	Cluster-34894.59783,Cluster-34894.8480,Cluster-34894.104654,Cluster-34894.29377,Cluster-34894.55304,Cluster-34894.9940,Cluster-34894.8479,Cluster-34894.8481,Cluster-34894.61954
GO:0048285	organelle fission	biological_process	0.25766	1	14	1654	337	49533	Cluster-34894.72501,Cluster-34894.96657,Cluster-34894.19751,Cluster-34894.58726,Cluster-34894.76815,Cluster-34894.35213,Cluster-34894.61660,Cluster-34894.60277,Cluster-34894.99254,Cluster-34894.28931,Cluster-34894.16182,Cluster-34894.25747,Cluster-34894.15714,Cluster-34894.96049
GO:0019843	rRNA binding	molecular_function	0.25778	1	2	1654	28	49533	Cluster-34894.45300,Cluster-34894.31116
GO:0032065	cortical protein anchoring	biological_process	0.25881	1	2	1654	24	49533	Cluster-34894.90646,Cluster-34894.32737
GO:0006370	7-methylguanosine mRNA capping	biological_process	0.25902	1	2	1654	27	49533	Cluster-34894.15239,Cluster-34894.42954
GO:0015721	bile acid and bile salt transport	biological_process	0.25957	1	2	1654	30	49533	Cluster-34894.27174,Cluster-34894.99500
GO:0046982	protein heterodimerization activity	molecular_function	0.25957	1	2	1654	30	49533	Cluster-34894.27174,Cluster-34894.99500
GO:0051258	protein polymerization	biological_process	0.25958	1	18	1654	445	49533	Cluster-34894.15713,Cluster-34894.43248,Cluster-34894.17915,Cluster-34894.24432,Cluster-34894.12466,Cluster-34894.59925,Cluster-34894.22821,Cluster-34894.21275,Cluster-34894.24264,Cluster-14514.0,Cluster-34894.60834,Cluster-34894.16182,Cluster-34894.17019,Cluster-34894.19751,Cluster-34894.38829,Cluster-34894.45995,Cluster-34894.15898,Cluster-34894.77674
GO:0016762	xyloglucan:xyloglucosyl transferase activity	molecular_function	0.25992	1	1	1654	8	49533	Cluster-34894.10499
GO:0048046	apoplast	cellular_component	0.25992	1	1	1654	8	49533	Cluster-34894.10499
GO:1901607	alpha-amino acid biosynthetic process	biological_process	0.26142	1	14	1654	335	49533	Cluster-34894.41391,Cluster-34894.6548,Cluster-34894.10810,Cluster-34894.8401,Cluster-16758.1,Cluster-34894.98548,Cluster-34894.95221,Cluster-35241.0,Cluster-34894.61730,Cluster-34894.17719,Cluster-34894.46259,Cluster-16718.0,Cluster-4270.2,Cluster-34894.14416
GO:0008375	acetylglucosaminyltransferase activity	molecular_function	0.26165	1	5	1654	94	49533	Cluster-34894.28196,Cluster-34894.100752,Cluster-34894.55056,Cluster-34894.1649,Cluster-34894.52934
GO:0006576	cellular biogenic amine metabolic process	biological_process	0.2623	1	12	1654	268	49533	Cluster-34894.38742,Cluster-34894.61254,Cluster-34894.63617,Cluster-34894.103691,Cluster-14563.0,Cluster-34894.61252,Cluster-34894.96635,Cluster-34894.27841,Cluster-34894.61730,Cluster-34894.42545,Cluster-34894.82207,Cluster-34894.14416
GO:0044106	cellular amine metabolic process	biological_process	0.2623	1	12	1654	268	49533	Cluster-34894.61730,Cluster-34894.27841,Cluster-34894.14416,Cluster-34894.42545,Cluster-34894.82207,Cluster-34894.103691,Cluster-34894.63617,Cluster-34894.38742,Cluster-34894.61254,Cluster-14563.0,Cluster-34894.96635,Cluster-34894.61252
GO:0005787	signal peptidase complex	cellular_component	0.26252	1	4	1654	77	49533	Cluster-34894.58896,Cluster-34894.9314,Cluster-34894.49047,Cluster-34894.70803
GO:0006465	signal peptide processing	biological_process	0.26252	1	4	1654	77	49533	Cluster-34894.49047,Cluster-34894.70803,Cluster-34894.9314,Cluster-34894.58896
GO:0009360	DNA polymerase III complex	cellular_component	0.26267	1	2	1654	28	49533	Cluster-34894.63117,Cluster-11760.0
GO:0008488	gamma-glutamyl carboxylase activity	molecular_function	0.26375	1	1	1654	9	49533	Cluster-34894.62299
GO:0017187	peptidyl-glutamic acid carboxylation	biological_process	0.26375	1	1	1654	9	49533	Cluster-34894.62299
GO:0018200	peptidyl-glutamic acid modification	biological_process	0.26375	1	1	1654	9	49533	Cluster-34894.62299
GO:0018214	protein carboxylation	biological_process	0.26375	1	1	1654	9	49533	Cluster-34894.62299
GO:0042600	chorion	cellular_component	0.26609	1	3	1654	53	49533	Cluster-34894.11897,Cluster-34894.68037,Cluster-34894.96944
GO:0033036	macromolecule localization	biological_process	0.26671	1	99	1654	2726	49533	Cluster-34894.61298,Cluster-34894.22488,Cluster-34894.41362,Cluster-34894.56151,Cluster-34894.68037,Cluster-34894.13896,Cluster-34894.76188,Cluster-34894.52311,Cluster-34894.32549,Cluster-34894.50527,Cluster-34894.79358,Cluster-34894.10964,Cluster-34894.47996,Cluster-34894.67896,Cluster-34894.81721,Cluster-34894.67141,Cluster-34894.60363,Cluster-34894.72073,Cluster-34894.46289,Cluster-34894.15713…
GO:0009308	amine metabolic process	biological_process	0.26727	1	13	1654	295	49533	Cluster-34894.27841,Cluster-34894.61730,Cluster-34894.14416,Cluster-34894.42545,Cluster-34894.82207,Cluster-34894.103691,Cluster-34894.63617,Cluster-36750.0,Cluster-34894.38742,Cluster-34894.61254,Cluster-14563.0,Cluster-34894.61252,Cluster-34894.96635
GO:0010167	response to nitrate	biological_process	0.26781	1	1	1654	8	49533	Cluster-34894.59585
GO:0015706	nitrate transport	biological_process	0.26781	1	1	1654	8	49533	Cluster-34894.59585
GO:0006446	regulation of translational initiation	biological_process	0.26851	1	8	1654	180	49533	Cluster-34894.17406,Cluster-34894.104224,Cluster-34894.2329,Cluster-34894.93414,Cluster-34894.54655,Cluster-34894.98656,Cluster-34894.53349,Cluster-34894.7298
GO:0000377	RNA splicing, via transesterification reactions with bulged adenosine as nucleophile	biological_process	0.26944	1	8	1654	186	49533	Cluster-34894.71301,Cluster-34894.80154,Cluster-34894.99031,Cluster-34894.101047,Cluster-34894.102519,Cluster-34894.25010,Cluster-34894.22822,Cluster-34894.57548
GO:0000398	mRNA splicing, via spliceosome	biological_process	0.26944	1	8	1654	186	49533	Cluster-34894.57548,Cluster-34894.22822,Cluster-34894.25010,Cluster-34894.71301,Cluster-34894.80154,Cluster-34894.101047,Cluster-34894.102519,Cluster-34894.99031
GO:0044445	cytosolic part	cellular_component	0.27152	1	6	1654	126	49533	Cluster-34894.92759,Cluster-34894.46259,Cluster-34894.13361,Cluster-34894.53949,Cluster-34894.45628,Cluster-34894.51231
GO:0045934	negative regulation of nucleobase-containing compound metabolic process	biological_process	0.2722	1	6	1654	124	49533	Cluster-34894.71563,Cluster-34894.17604,Cluster-19183.0,Cluster-34894.81610,Cluster-34894.13664,Cluster-34894.6241
GO:0032507	maintenance of protein location in cell	biological_process	0.27256	1	5	1654	95	49533	Cluster-34894.65039,Cluster-34894.8057,Cluster-34894.8591,Cluster-34894.90646,Cluster-34894.32737
GO:0045185	maintenance of protein location	biological_process	0.27256	1	5	1654	95	49533	Cluster-34894.90646,Cluster-34894.8591,Cluster-34894.8057,Cluster-34894.65039,Cluster-34894.32737
GO:0051651	maintenance of location in cell	biological_process	0.27256	1	5	1654	95	49533	Cluster-34894.32737,Cluster-34894.8057,Cluster-34894.65039,Cluster-34894.90646,Cluster-34894.8591
GO:0008380	RNA splicing	biological_process	0.27337	1	10	1654	235	49533	Cluster-34894.102519,Cluster-34894.101047,Cluster-34894.99031,Cluster-34894.71301,Cluster-34894.80154,Cluster-34894.25010,Cluster-34894.81648,Cluster-34894.57548,Cluster-34894.22822,Cluster-34894.81644
GO:0030674	protein binding, bridging	molecular_function	0.27386	1	16	1654	398	49533	Cluster-34894.16182,Cluster-34894.60834,Cluster-14514.0,Cluster-34894.24264,Cluster-34894.15898,Cluster-34894.17019,Cluster-34894.19751,Cluster-34894.45995,Cluster-34894.38829,Cluster-34894.24432,Cluster-34894.17915,Cluster-34894.15713,Cluster-34894.22821,Cluster-34894.21275,Cluster-34894.59925,Cluster-34894.96476
GO:0060090	binding, bridging	molecular_function	0.27386	1	16	1654	398	49533	Cluster-34894.24432,Cluster-34894.17915,Cluster-34894.15713,Cluster-34894.21275,Cluster-34894.22821,Cluster-34894.59925,Cluster-34894.96476,Cluster-34894.16182,Cluster-34894.60834,Cluster-14514.0,Cluster-34894.24264,Cluster-34894.15898,Cluster-34894.38829,Cluster-34894.45995,Cluster-34894.19751,Cluster-34894.17019
GO:0000087	mitotic M phase	biological_process	0.27412	1	3	1654	56	49533	Cluster-34894.19751,Cluster-34894.96049,Cluster-34894.16182
GO:0098763	mitotic cell cycle phase	biological_process	0.27412	1	3	1654	56	49533	Cluster-34894.19751,Cluster-34894.16182,Cluster-34894.96049
GO:0004348	glucosylceramidase activity	molecular_function	0.27445	1	1	1654	8	49533	Cluster-34894.50285
GO:0006400	tRNA modification	biological_process	0.27494	1	11	1654	246	49533	Cluster-34894.26752,Cluster-34894.96990,Cluster-34894.15653,Cluster-34894.95237,Cluster-26628.0,Cluster-34894.41191,Cluster-34894.92978,Cluster-34894.29132,Cluster-34894.15344,Cluster-34894.15343,Cluster-34894.81176
GO:0050897	cobalt ion binding	molecular_function	0.27564	1	1	1654	9	49533	Cluster-34894.38003
GO:0009991	response to extracellular stimulus	biological_process	0.27573	1	5	1654	99	49533	Cluster-34894.41486,Cluster-34894.95221,Cluster-34894.60834,Cluster-34894.82976,Cluster-34894.46259
GO:0031668	cellular response to extracellular stimulus	biological_process	0.27573	1	5	1654	99	49533	Cluster-34894.46259,Cluster-34894.82976,Cluster-34894.95221,Cluster-34894.60834,Cluster-34894.41486
GO:0071496	cellular response to external stimulus	biological_process	0.27573	1	5	1654	99	49533	Cluster-34894.46259,Cluster-34894.82976,Cluster-34894.95221,Cluster-34894.60834,Cluster-34894.41486
GO:0004743	pyruvate kinase activity	molecular_function	0.27628	1	1	1654	9	49533	Cluster-34894.86397
GO:0006566	threonine metabolic process	biological_process	0.27628	1	3	1654	50	49533	Cluster-34894.83331,Cluster-34894.99967,Cluster-34894.83329
GO:0051169	nuclear transport	biological_process	0.27665	1	17	1654	428	49533	Cluster-34894.80202,Cluster-34894.10023,Cluster-34894.96049,Cluster-34894.14832,Cluster-34894.15714,Cluster-34894.72073,Cluster-34894.21651,Cluster-34894.98268,Cluster-34894.91000,Cluster-34894.95221,Cluster-34894.75421,Cluster-34894.69959,Cluster-34894.16182,Cluster-34894.69437,Cluster-34894.26884,Cluster-34894.68407,Cluster-34894.61988
GO:0030541	plasmid partitioning	biological_process	0.27717	1	1	1654	8	49533	Cluster-34894.39141
GO:0005283	sodium:amino acid symporter activity	molecular_function	0.27858	1	1	1654	9	49533	Cluster-34894.47234
GO:0005416	cation:amino acid symporter activity	molecular_function	0.27858	1	1	1654	9	49533	Cluster-34894.47234
GO:0016657	oxidoreductase activity, acting on NAD(P)H, nitrogenous group as acceptor	molecular_function	0.27888	1	1	1654	9	49533	Cluster-34894.22318
GO:0033739	preQ1 synthase activity	molecular_function	0.27888	1	1	1654	9	49533	Cluster-34894.22318
GO:0016878	acid-thiol ligase activity	molecular_function	0.27957	1	1	1654	10	49533	Cluster-34894.104963
GO:0008483	transaminase activity	molecular_function	0.27963	1	2	1654	31	49533	Cluster-34894.88991,Cluster-34894.66591
GO:0030430	host cell cytoplasm	cellular_component	0.27969	1	3	1654	53	49533	Cluster-34894.78867,Cluster-34894.61988,Cluster-34894.98268
GO:0046487	glyoxylate metabolic process	biological_process	0.27977	1	3	1654	50	49533	Cluster-16758.1,Cluster-34894.61730,Cluster-34894.71967
GO:0004399	histidinol dehydrogenase activity	molecular_function	0.27993	1	1	1654	10	49533	Cluster-34894.46259
GO:0031082	BLOC complex	cellular_component	0.28002	1	3	1654	53	49533	Cluster-34894.45628,Cluster-34894.46259,Cluster-34894.13361
GO:0031083	BLOC-1 complex	cellular_component	0.28002	1	3	1654	53	49533	Cluster-34894.13361,Cluster-34894.46259,Cluster-34894.45628
GO:0004748	ribonucleoside-diphosphate reductase activity, thioredoxin disulfide as acceptor	molecular_function	0.28098	1	1	1654	9	49533	Cluster-34894.38003
GO:0005971	ribonucleoside-diphosphate reductase complex	cellular_component	0.28098	1	1	1654	9	49533	Cluster-34894.38003
GO:0061731	ribonucleoside-diphosphate reductase activity	molecular_function	0.28098	1	1	1654	9	49533	Cluster-34894.38003
GO:0007271	synaptic transmission, cholinergic	biological_process	0.2843	1	1	1654	9	49533	Cluster-34894.33039
GO:0022898	regulation of transmembrane transporter activity	biological_process	0.2843	1	1	1654	9	49533	Cluster-34894.33039
GO:0030431	sleep	biological_process	0.2843	1	1	1654	9	49533	Cluster-34894.33039
GO:0032222	regulation of synaptic transmission, cholinergic	biological_process	0.2843	1	1	1654	9	49533	Cluster-34894.33039
GO:0032409	regulation of transporter activity	biological_process	0.2843	1	1	1654	9	49533	Cluster-34894.33039
GO:0032411	positive regulation of transporter activity	biological_process	0.2843	1	1	1654	9	49533	Cluster-34894.33039
GO:0032412	regulation of ion transmembrane transporter activity	biological_process	0.2843	1	1	1654	9	49533	Cluster-34894.33039
GO:0032414	positive regulation of ion transmembrane transporter activity	biological_process	0.2843	1	1	1654	9	49533	Cluster-34894.33039
GO:0034235	GPI anchor binding	molecular_function	0.2843	1	1	1654	9	49533	Cluster-34894.33039
GO:0034762	regulation of transmembrane transport	biological_process	0.2843	1	1	1654	9	49533	Cluster-34894.33039
GO:0034764	positive regulation of transmembrane transport	biological_process	0.2843	1	1	1654	9	49533	Cluster-34894.33039
GO:0034765	regulation of ion transmembrane transport	biological_process	0.2843	1	1	1654	9	49533	Cluster-34894.33039
GO:0034767	positive regulation of ion transmembrane transport	biological_process	0.2843	1	1	1654	9	49533	Cluster-34894.33039
GO:0043266	regulation of potassium ion transport	biological_process	0.2843	1	1	1654	9	49533	Cluster-34894.33039
GO:0043268	positive regulation of potassium ion transport	biological_process	0.2843	1	1	1654	9	49533	Cluster-34894.33039
GO:0043270	positive regulation of ion transport	biological_process	0.2843	1	1	1654	9	49533	Cluster-34894.33039
GO:1901016	regulation of potassium ion transmembrane transporter activity	biological_process	0.2843	1	1	1654	9	49533	Cluster-34894.33039
GO:1901018	positive regulation of potassium ion transmembrane transporter activity	biological_process	0.2843	1	1	1654	9	49533	Cluster-34894.33039
GO:1901379	regulation of potassium ion transmembrane transport	biological_process	0.2843	1	1	1654	9	49533	Cluster-34894.33039
GO:1901381	positive regulation of potassium ion transmembrane transport	biological_process	0.2843	1	1	1654	9	49533	Cluster-34894.33039
GO:1903818	positive regulation of voltage-gated potassium channel activity	biological_process	0.2843	1	1	1654	9	49533	Cluster-34894.33039
GO:1904062	regulation of cation transmembrane transport	biological_process	0.2843	1	1	1654	9	49533	Cluster-34894.33039
GO:1904064	positive regulation of cation transmembrane transport	biological_process	0.2843	1	1	1654	9	49533	Cluster-34894.33039
GO:2001257	regulation of cation channel activity	biological_process	0.2843	1	1	1654	9	49533	Cluster-34894.33039
GO:2001259	positive regulation of cation channel activity	biological_process	0.2843	1	1	1654	9	49533	Cluster-34894.33039
GO:0006855	drug transmembrane transport	biological_process	0.28482	1	2	1654	30	49533	Cluster-34894.55671,Cluster-34894.61525
GO:0015893	drug transport	biological_process	0.28482	1	2	1654	30	49533	Cluster-34894.55671,Cluster-34894.61525
GO:0009297	pilus assembly	biological_process	0.28637	1	2	1654	29	49533	Cluster-34894.10810,Cluster-34894.87268
GO:0043711	pilus organization	biological_process	0.28637	1	2	1654	29	49533	Cluster-34894.10810,Cluster-34894.87268
GO:0003899	DNA-directed RNA polymerase activity	molecular_function	0.28698	1	20	1654	531	49533	Cluster-34894.75218,Cluster-34894.63010,Cluster-34894.60277,Cluster-34894.90167,Cluster-34894.22821,Cluster-34894.50527,Cluster-34894.15292,Cluster-34894.38003,Cluster-34894.57438,Cluster-34894.36187,Cluster-34894.83425,Cluster-34894.60924,Cluster-34894.63014,Cluster-34894.88457,Cluster-34894.64310,Cluster-34894.40392,Cluster-34894.22823,Cluster-34894.62093,Cluster-34894.44517,Cluster-34894.35796
GO:0005742	mitochondrial outer membrane translocase complex	cellular_component	0.28858	1	5	1654	105	49533	Cluster-34894.15621,Cluster-34894.86738,Cluster-34894.70529,Cluster-34894.29410,Cluster-34894.29411
GO:0003830	beta-1,4-mannosylglycoprotein 4-beta-N-acetylglucosaminyltransferase activity	molecular_function	0.29034	1	1	1654	10	49533	Cluster-34894.28196
GO:0072528	pyrimidine-containing compound biosynthetic process	biological_process	0.29232	1	5	1654	107	49533	Cluster-34894.76990,Cluster-34894.19108,Cluster-34894.17808,Cluster-34894.56367,Cluster-34894.72801
GO:0004144	diacylglycerol O-acyltransferase activity	molecular_function	0.29253	1	1	1654	10	49533	Cluster-34894.60314
GO:0016411	acylglycerol O-acyltransferase activity	molecular_function	0.29253	1	1	1654	10	49533	Cluster-34894.60314
GO:0006417	regulation of translation	biological_process	0.29431	1	12	1654	290	49533	Cluster-34894.93414,Cluster-30483.0,Cluster-34894.101011,Cluster-34894.2329,Cluster-34894.54655,Cluster-34894.17406,Cluster-34894.44517,Cluster-34894.104224,Cluster-34894.7298,Cluster-34894.53349,Cluster-34894.98656,Cluster-34894.18092
GO:0034248	regulation of cellular amide metabolic process	biological_process	0.29431	1	12	1654	290	49533	Cluster-34894.18092,Cluster-34894.53349,Cluster-34894.7298,Cluster-34894.98656,Cluster-34894.54655,Cluster-34894.93414,Cluster-34894.101011,Cluster-34894.2329,Cluster-30483.0,Cluster-34894.104224,Cluster-34894.44517,Cluster-34894.17406
GO:0071554	cell wall organization or biogenesis	biological_process	0.29443	1	7	1654	157	49533	Cluster-34894.15556,Cluster-34894.98975,Cluster-34894.17293,Cluster-34894.18400,Cluster-34894.17292,Cluster-34894.31051,Cluster-34894.86735
GO:0008173	RNA methyltransferase activity	molecular_function	0.2965	1	6	1654	124	49533	Cluster-34894.50833,Cluster-34894.41687,Cluster-34894.63014,Cluster-34894.41602,Cluster-34894.41191,Cluster-34894.42954
GO:1903510	mucopolysaccharide metabolic process	biological_process	0.29833	1	2	1654	31	49533	Cluster-34894.18176,Cluster-34894.1649
GO:0072519	parasitism	biological_process	0.29836	1	1	1654	9	49533	Cluster-34894.42997
GO:0030077	plasma membrane light-harvesting complex	cellular_component	0.2984	1	2	1654	31	49533	Cluster-34894.51890,Cluster-34894.30922
GO:0042716	plasma membrane-derived chromatophore	cellular_component	0.2984	1	2	1654	31	49533	Cluster-34894.51890,Cluster-34894.30922
GO:0019646	aerobic electron transport chain	biological_process	0.29852	1	1	1654	8	49533	Cluster-34894.41391
GO:0071944	cell periphery	cellular_component	0.29855	1	65	1654	1767	49533	Cluster-34894.34704,Cluster-34894.71301,Cluster-34894.12066,Cluster-33544.0,Cluster-34894.46661,Cluster-34894.16182,Cluster-34894.53239,Cluster-34894.61671,Cluster-34894.94885,Cluster-34894.46259,Cluster-34894.75395,Cluster-34894.27174,Cluster-34894.55456,Cluster-34894.54578,Cluster-34894.65879,Cluster-34894.41362,Cluster-34894.100797,Cluster-34894.37600,Cluster-34894.56478,Cluster-34894.15712,Cl…
GO:0072527	pyrimidine-containing compound metabolic process	biological_process	0.29879	1	23	1654	620	49533	Cluster-34894.57438,Cluster-34894.72801,Cluster-34894.36187,Cluster-34894.56367,Cluster-34894.83425,Cluster-34894.60924,Cluster-34894.88457,Cluster-34894.76990,Cluster-34894.35796,Cluster-34894.19108,Cluster-34894.22823,Cluster-34894.62093,Cluster-34894.17808,Cluster-34894.75218,Cluster-34894.90167,Cluster-34894.60277,Cluster-34894.63010,Cluster-34894.102709,Cluster-34894.50527,Cluster-34894.2282…
GO:0006626	protein targeting to mitochondrion	biological_process	0.29935	1	3	1654	59	49533	Cluster-34894.15621,Cluster-34894.29410,Cluster-34894.29411
GO:0005829	cytosol	cellular_component	0.29977	1	6	1654	131	49533	Cluster-34894.51231,Cluster-34894.45628,Cluster-34894.53949,Cluster-34894.92759,Cluster-34894.46259,Cluster-34894.13361
GO:0043232	intracellular non-membrane-bounded organelle	cellular_component	0.29981	1	148	1654	4209	49533	Cluster-34894.21651,Cluster-34894.14312,Cluster-34894.96990,Cluster-34894.105470,Cluster-34894.105700,Cluster-34894.60314,Cluster-34894.52115,Cluster-34894.31116,Cluster-25895.0,Cluster-34894.63399,Cluster-34894.58093,Cluster-34894.14311,Cluster-34894.35044,Cluster-34894.72210,Cluster-34894.7647,Cluster-14514.0,Cluster-34894.83425,Cluster-34894.61660,Cluster-34894.83148,Cluster-34894.70309,Cluste…
GO:0008521	acetyl-CoA transporter activity	molecular_function	0.30092	1	1	1654	11	49533	Cluster-34894.88450
GO:0015876	acetyl-CoA transport	biological_process	0.30092	1	1	1654	11	49533	Cluster-34894.88450
GO:0015916	fatty-acyl-CoA transport	biological_process	0.30092	1	1	1654	11	49533	Cluster-34894.88450
GO:0051182	coenzyme transport	biological_process	0.30092	1	1	1654	11	49533	Cluster-34894.88450
GO:0051185	coenzyme transporter activity	molecular_function	0.30092	1	1	1654	11	49533	Cluster-34894.88450
GO:1901337	thioester transport	biological_process	0.30092	1	1	1654	11	49533	Cluster-34894.88450
GO:0019072	viral genome packaging	biological_process	0.30104	1	2	1654	32	49533	Cluster-34894.79692,Cluster-34894.13549
GO:0042470	melanosome	cellular_component	0.3026	1	4	1654	79	49533	Cluster-34894.55389,Cluster-34894.47768,Cluster-34894.11431,Cluster-34894.108307
GO:0048770	pigment granule	cellular_component	0.3026	1	4	1654	79	49533	Cluster-34894.55389,Cluster-34894.108307,Cluster-34894.11431,Cluster-34894.47768
GO:0009253	peptidoglycan catabolic process	biological_process	0.30286	1	1	1654	10	49533	Cluster-34894.18400
GO:0010608	posttranscriptional regulation of gene expression	biological_process	0.30291	1	12	1654	292	49533	Cluster-34894.101011,Cluster-34894.2329,Cluster-30483.0,Cluster-34894.93414,Cluster-34894.54655,Cluster-34894.44517,Cluster-34894.17406,Cluster-34894.104224,Cluster-34894.7298,Cluster-34894.53349,Cluster-34894.98656,Cluster-34894.18092
GO:0040007	growth	biological_process	0.30656	1	15	1654	361	49533	Cluster-36750.0,Cluster-34894.14125,Cluster-34894.57548,Cluster-26774.0,Cluster-34894.66229,Cluster-34894.27736,Cluster-30471.0,Cluster-34894.82713,Cluster-34894.41420,Cluster-34894.69855,Cluster-34894.89318,Cluster-34894.99967,Cluster-34894.65879,Cluster-34894.96476,Cluster-34894.72213
GO:0071855	neuropeptide receptor binding	molecular_function	0.30722	1	1	1654	10	49533	Cluster-34894.35213
GO:0016769	transferase activity, transferring nitrogenous groups	molecular_function	0.30734	1	2	1654	33	49533	Cluster-34894.66591,Cluster-34894.88991
GO:0004325	ferrochelatase activity	molecular_function	0.30781	1	1	1654	9	49533	Cluster-34894.82976
GO:0006402	mRNA catabolic process	biological_process	0.30791	1	5	1654	105	49533	Cluster-34894.15887,Cluster-34894.26738,Cluster-34894.93280,Cluster-34894.28879,Cluster-34894.15889
GO:0030261	chromosome condensation	biological_process	0.30837	1	2	1654	32	49533	Cluster-34894.92936,Cluster-34894.32348
GO:0030203	glycosaminoglycan metabolic process	biological_process	0.30919	1	8	1654	185	49533	Cluster-34894.17292,Cluster-34894.1649,Cluster-34894.86735,Cluster-34894.18176,Cluster-34894.18400,Cluster-34894.98975,Cluster-34894.17293,Cluster-34894.14094
GO:0006897	endocytosis	biological_process	0.30952	1	3	1654	63	49533	Cluster-34894.96715,Cluster-34894.82431,Cluster-34894.13548
GO:0055114	oxidation-reduction process	biological_process	0.30963	1	112	1654	3077	49533	Cluster-34894.61252,Cluster-34894.71540,Cluster-34894.100671,Cluster-34894.41391,Cluster-34894.91765,Cluster-34894.46098,Cluster-34894.65425,Cluster-34894.38372,Cluster-34894.56369,Cluster-34894.59165,Cluster-34894.29908,Cluster-34894.58364,Cluster-34894.77308,Cluster-34894.78703,Cluster-34671.1,Cluster-34894.50485,Cluster-34894.10620,Cluster-34894.84142,Cluster-34894.48650,Cluster-34894.78959,Cl…
GO:0032865	ERMES complex	cellular_component	0.31119	1	1	1654	11	49533	Cluster-34894.83060
GO:0044232	organelle membrane contact site	cellular_component	0.31119	1	1	1654	11	49533	Cluster-34894.83060
GO:0044233	ER-mitochondrion membrane contact site	cellular_component	0.31119	1	1	1654	11	49533	Cluster-34894.83060
GO:0031965	nuclear membrane	cellular_component	0.31154	1	2	1654	34	49533	Cluster-34894.13286,Cluster-34894.13287
GO:0016854	racemase and epimerase activity	molecular_function	0.31211	1	2	1654	35	49533	Cluster-32090.1,Cluster-34894.47056
GO:0000786	nucleosome	cellular_component	0.31291	1	3	1654	59	49533	Cluster-34894.70309,Cluster-16853.1,Cluster-34894.87626
GO:0017004	cytochrome complex assembly	biological_process	0.31328	1	5	1654	109	49533	Cluster-34894.5266,Cluster-34894.57196,Cluster-34894.99615,Cluster-34894.50527,Cluster-34894.70713
GO:0005794	Golgi apparatus	cellular_component	0.31335	1	14	1654	346	49533	Cluster-34894.32549,Cluster-34894.19751,Cluster-34894.45300,Cluster-34894.34704,Cluster-34894.52934,Cluster-34894.13896,Cluster-34894.85012,Cluster-34894.101377,Cluster-34894.53919,Cluster-34894.25747,Cluster-34894.49352,Cluster-32401.0,Cluster-29404.0,Cluster-34894.68407
GO:0030570	pectate lyase activity	molecular_function	0.31338	1	1	1654	10	49533	Cluster-34894.87239
GO:0006072	glycerol-3-phosphate metabolic process	biological_process	0.31349	1	2	1654	33	49533	Cluster-34894.61252,Cluster-34894.61254
GO:0052689	carboxylic ester hydrolase activity	molecular_function	0.31368	1	5	1654	102	49533	Cluster-34894.73823,Cluster-34894.79063,Cluster-34894.100616,Cluster-34894.109736,Cluster-34894.15239
GO:0016756	glutathione gamma-glutamylcysteinyltransferase activity	molecular_function	0.31404	1	1	1654	10	49533	Cluster-34894.102233
GO:0046937	phytochelatin metabolic process	biological_process	0.31404	1	1	1654	10	49533	Cluster-34894.102233
GO:0046938	phytochelatin biosynthetic process	biological_process	0.31404	1	1	1654	10	49533	Cluster-34894.102233
GO:0034470	ncRNA processing	biological_process	0.3141	1	25	1654	625	49533	Cluster-34894.15344,Cluster-34894.41602,Cluster-34894.242,Cluster-34894.12301,Cluster-34894.50833,Cluster-34894.61254,Cluster-34894.26752,Cluster-26628.0,Cluster-34894.92978,Cluster-34894.41687,Cluster-34894.95237,Cluster-34894.96990,Cluster-34894.61252,Cluster-34894.15653,Cluster-34894.54219,Cluster-34894.29132,Cluster-34894.81176,Cluster-34894.92197,Cluster-34894.15343,Cluster-34894.67786,Clust…
GO:0019184	nonribosomal peptide biosynthetic process	biological_process	0.31562	1	2	1654	32	49533	Cluster-8208.0,Cluster-34894.22436
GO:0004807	triose-phosphate isomerase activity	molecular_function	0.31631	1	1	1654	10	49533	Cluster-12597.1
GO:0043234	protein complex	cellular_component	0.31663	1	300	1654	8528	49533	Cluster-34894.29608,Cluster-34894.15653,Cluster-34894.53949,Cluster-34894.75395,Cluster-34894.76815,Cluster-34268.0,Cluster-34894.89565,Cluster-34894.72138,Cluster-34894.60505,Cluster-34894.51890,Cluster-34894.38003,Cluster-26495.0,Cluster-34894.16182,Cluster-34894.101381,Cluster-22213.1,Cluster-34894.58445,Cluster-34894.69101,Cluster-34894.68367,Cluster-34894.102323,Cluster-34894.40384,Cluster-3…
GO:0032182	ubiquitin-like protein binding	molecular_function	0.31799	1	5	1654	100	49533	Cluster-34894.17880,Cluster-34894.73942,Cluster-34894.17882,Cluster-34894.14495,Cluster-34894.23798
GO:0046527	glucosyltransferase activity	molecular_function	0.31833	1	3	1654	57	49533	Cluster-34894.13455,Cluster-34894.13456,Cluster-34894.43319
GO:0030204	chondroitin sulfate metabolic process	biological_process	0.31871	1	1	1654	11	49533	Cluster-34894.1649
GO:0030206	chondroitin sulfate biosynthetic process	biological_process	0.31871	1	1	1654	11	49533	Cluster-34894.1649
GO:0050650	chondroitin sulfate proteoglycan biosynthetic process	biological_process	0.31871	1	1	1654	11	49533	Cluster-34894.1649
GO:0050654	chondroitin sulfate proteoglycan metabolic process	biological_process	0.31871	1	1	1654	11	49533	Cluster-34894.1649
GO:0008652	cellular amino acid biosynthetic process	biological_process	0.31878	1	14	1654	354	49533	Cluster-16718.0,Cluster-34894.46259,Cluster-34894.17719,Cluster-34894.14416,Cluster-4270.2,Cluster-34894.95221,Cluster-35241.0,Cluster-34894.61730,Cluster-34894.10810,Cluster-34894.8401,Cluster-34894.98548,Cluster-16758.1,Cluster-34894.6548,Cluster-34894.41391
GO:0070008	serine-type exopeptidase activity	molecular_function	0.31932	1	5	1654	104	49533	Cluster-34894.77692,Cluster-34894.104525,Cluster-34894.14125,Cluster-34894.89318,Cluster-34894.36758
GO:0044550	secondary metabolite biosynthetic process	biological_process	0.31978	1	3	1654	54	49533	Cluster-8208.0,Cluster-34894.102233,Cluster-34894.37401
GO:0018492	carbon-monoxide dehydrogenase (acceptor) activity	molecular_function	0.32232	1	1	1654	10	49533	Cluster-34894.74877
GO:0070009	serine-type aminopeptidase activity	molecular_function	0.32358	1	2	1654	33	49533	Cluster-34894.89318,Cluster-34894.14125
GO:0017046	peptide hormone binding	molecular_function	0.32381	1	1	1654	11	49533	Cluster-34894.99967
GO:0042562	hormone binding	molecular_function	0.32381	1	1	1654	11	49533	Cluster-34894.99967
GO:0051424	corticotropin-releasing hormone binding	molecular_function	0.32381	1	1	1654	11	49533	Cluster-34894.99967
GO:0046999	regulation of conjugation	biological_process	0.32428	1	1	1654	11	49533	Cluster-34894.79693
GO:0016861	intramolecular oxidoreductase activity, interconverting aldoses and ketoses	molecular_function	0.32619	1	3	1654	56	49533	Cluster-34894.97051,Cluster-12597.1,Cluster-34894.67287
GO:0005861	troponin complex	cellular_component	0.32714	1	2	1654	35	49533	Cluster-34894.31116,Cluster-34894.71353
GO:0005865	striated muscle thin filament	cellular_component	0.32714	1	2	1654	35	49533	Cluster-34894.71353,Cluster-34894.31116
GO:0030016	myofibril	cellular_component	0.32714	1	2	1654	35	49533	Cluster-34894.31116,Cluster-34894.71353
GO:0030017	sarcomere	cellular_component	0.32714	1	2	1654	35	49533	Cluster-34894.31116,Cluster-34894.71353
GO:0036379	myofilament	cellular_component	0.32714	1	2	1654	35	49533	Cluster-34894.71353,Cluster-34894.31116
GO:0043292	contractile fiber	cellular_component	0.32714	1	2	1654	35	49533	Cluster-34894.31116,Cluster-34894.71353
GO:0044449	contractile fiber part	cellular_component	0.32714	1	2	1654	35	49533	Cluster-34894.31116,Cluster-34894.71353
GO:0019888	protein phosphatase regulator activity	molecular_function	0.32726	1	2	1654	32	49533	Cluster-34894.60188,Cluster-34894.60187
GO:0031304	intrinsic component of mitochondrial inner membrane	cellular_component	0.32754	1	2	1654	33	49533	Cluster-34894.22821,Cluster-34894.77939
GO:0031305	integral component of mitochondrial inner membrane	cellular_component	0.32754	1	2	1654	33	49533	Cluster-34894.77939,Cluster-34894.22821
GO:0032592	integral component of mitochondrial membrane	cellular_component	0.32754	1	2	1654	33	49533	Cluster-34894.77939,Cluster-34894.22821
GO:0098573	intrinsic component of mitochondrial membrane	cellular_component	0.32754	1	2	1654	33	49533	Cluster-34894.22821,Cluster-34894.77939
GO:0043228	non-membrane-bounded organelle	cellular_component	0.32755	1	151	1654	4319	49533	Cluster-34894.41360,Cluster-34894.84190,Cluster-34894.58638,Cluster-34894.15710,Cluster-34894.50527,Cluster-34894.15344,Cluster-34894.22821,Cluster-34894.61974,Cluster-34894.93414,Cluster-34894.90167,Cluster-34894.63010,Cluster-34894.39312,Cluster-34894.50833,Cluster-34894.72787,Cluster-34894.72212,Cluster-34894.97722,Cluster-34894.96812,Cluster-34894.15712,Cluster-34894.14094,Cluster-34894.38003…
GO:0005845	mRNA cap binding complex	cellular_component	0.32767	1	1	1654	11	49533	Cluster-34894.101011
GO:0034518	RNA cap binding complex	cellular_component	0.32767	1	1	1654	11	49533	Cluster-34894.101011
GO:0000145	exocyst	cellular_component	0.32797	1	5	1654	105	49533	Cluster-34894.41362,Cluster-33544.0,Cluster-34894.56107,Cluster-34894.96049,Cluster-34894.41361
GO:0015846	polyamine transport	biological_process	0.32841	1	1	1654	11	49533	Cluster-34894.47234
GO:0007266	Rho protein signal transduction	biological_process	0.32875	1	8	1654	177	49533	Cluster-34894.93280,Cluster-13907.0,Cluster-34894.89541,Cluster-34894.73279,Cluster-34894.97991,Cluster-34894.5263,Cluster-34894.88440,Cluster-34894.9314
GO:0035023	regulation of Rho protein signal transduction	biological_process	0.32875	1	8	1654	177	49533	Cluster-34894.88440,Cluster-34894.5263,Cluster-34894.97991,Cluster-34894.9314,Cluster-34894.73279,Cluster-13907.0,Cluster-34894.93280,Cluster-34894.89541
GO:0015662	ATPase activity, coupled to transmembrane movement of ions, phosphorylative mechanism	molecular_function	0.32904	1	2	1654	34	49533	Cluster-34894.22373,Cluster-34894.7011
GO:0009628	response to abiotic stimulus	biological_process	0.3294	1	3	1654	58	49533	Cluster-34894.29907,Cluster-32564.2,Cluster-34894.29908
GO:0008033	tRNA processing	biological_process	0.32971	1	19	1654	468	49533	Cluster-26628.0,Cluster-34894.92978,Cluster-34894.15653,Cluster-34894.96990,Cluster-34894.61252,Cluster-34894.95237,Cluster-34894.61254,Cluster-34894.50833,Cluster-34894.26752,Cluster-34894.41602,Cluster-34894.12301,Cluster-34894.15344,Cluster-34894.37859,Cluster-34894.41191,Cluster-34894.81176,Cluster-34894.15343,Cluster-34894.92197,Cluster-34894.29132,Cluster-34894.54219
GO:0004715	non-membrane spanning protein tyrosine kinase activity	molecular_function	0.33015	1	1	1654	13	49533	Cluster-34894.76188
GO:0044036	cell wall macromolecule metabolic process	biological_process	0.33205	1	5	1654	110	49533	Cluster-34894.18400,Cluster-34894.17292,Cluster-34894.86735,Cluster-34894.17293,Cluster-34894.98975
GO:0008194	UDP-glycosyltransferase activity	molecular_function	0.33312	1	9	1654	211	49533	Cluster-34894.28196,Cluster-34894.13456,Cluster-34894.100752,Cluster-34894.77888,Cluster-34894.55056,Cluster-34894.1649,Cluster-34894.49352,Cluster-34894.13455,Cluster-34894.52934
GO:0004197	cysteine-type endopeptidase activity	molecular_function	0.3333	1	13	1654	312	49533	Cluster-34894.12629,Cluster-34894.43803,Cluster-34894.73604,Cluster-34894.59928,Cluster-34894.56264,Cluster-34894.63056,Cluster-34894.64728,Cluster-34894.102709,Cluster-34894.76305,Cluster-34894.67888,Cluster-34894.77692,Cluster-34894.73861,Cluster-34894.53989
GO:0008283	cell proliferation	biological_process	0.33338	1	12	1654	293	49533	Cluster-34894.14094,Cluster-34894.27736,Cluster-34894.41420,Cluster-34894.69855,Cluster-34894.82713,Cluster-30471.0,Cluster-34894.53590,Cluster-34894.99967,Cluster-34894.96476,Cluster-34894.65879,Cluster-7665.0,Cluster-34894.72213
GO:0042967	acyl-carrier-protein biosynthetic process	biological_process	0.33498	1	10	1654	236	49533	Cluster-34894.60314,Cluster-34894.17719,Cluster-34894.54152,Cluster-34894.92759,Cluster-34894.80873,Cluster-34894.53949,Cluster-34894.101808,Cluster-34894.6976,Cluster-34894.41391,Cluster-34894.51231
GO:0005912	adherens junction	cellular_component	0.33555	1	2	1654	32	49533	Cluster-34894.8591,Cluster-34894.8057
GO:0005924	cell-substrate adherens junction	cellular_component	0.33555	1	2	1654	32	49533	Cluster-34894.8591,Cluster-34894.8057
GO:0005925	focal adhesion	cellular_component	0.33555	1	2	1654	32	49533	Cluster-34894.8591,Cluster-34894.8057
GO:0030055	cell-substrate junction	cellular_component	0.33555	1	2	1654	32	49533	Cluster-34894.8057,Cluster-34894.8591
GO:0070161	anchoring junction	cellular_component	0.33555	1	2	1654	32	49533	Cluster-34894.8057,Cluster-34894.8591
GO:0006401	RNA catabolic process	biological_process	0.33602	1	5	1654	109	49533	Cluster-34894.15887,Cluster-34894.26738,Cluster-34894.28879,Cluster-34894.93280,Cluster-34894.15889
GO:0050804	modulation of synaptic transmission	biological_process	0.33797	1	1	1654	11	49533	Cluster-34894.33039
GO:0016247	channel regulator activity	molecular_function	0.33839	1	11	1654	279	49533	Cluster-34894.67139,Cluster-34894.41601,Cluster-34894.56941,Cluster-34894.63090,Cluster-34894.88440,Cluster-34894.85513,Cluster-34300.0,Cluster-34894.66808,Cluster-34894.100797,Cluster-34894.64310,Cluster-34894.28001
GO:0008360	regulation of cell shape	biological_process	0.33891	1	2	1654	36	49533	Cluster-34894.59925,Cluster-34894.12862
GO:0050662	coenzyme binding	molecular_function	0.3412	1	23	1654	569	49533	Cluster-34894.61252,Cluster-34894.61733,Cluster-34894.63117,Cluster-34894.10279,Cluster-34894.103235,Cluster-34894.104028,Cluster-34894.61254,Cluster-34894.17808,Cluster-34894.46259,Cluster-34894.56369,Cluster-34894.62019,Cluster-34894.109466,Cluster-34894.77308,Cluster-34894.33579,Cluster-34894.37859,Cluster-34894.101694,Cluster-34894.59881,Cluster-34894.65259,Cluster-34894.92197,Cluster-34894.8…
GO:0048869	cellular developmental process	biological_process	0.34296	1	21	1654	533	49533	Cluster-26495.0,Cluster-34894.45004,Cluster-34894.83200,Cluster-34894.66017,Cluster-34894.59925,Cluster-34894.71244,Cluster-34894.63685,Cluster-34894.96944,Cluster-34894.82713,Cluster-34894.31620,Cluster-34894.10279,Cluster-34894.44809,Cluster-34894.12862,Cluster-34894.56941,Cluster-34894.78551,Cluster-34894.64754,Cluster-37016.0,Cluster-34894.33109,Cluster-34894.62000,Cluster-34894.62381,Cluster…
GO:0004482	mRNA (guanine-N7-)-methyltransferase activity	molecular_function	0.34301	1	1	1654	11	49533	Cluster-34894.42954
GO:0016573	histone acetylation	biological_process	0.34349	1	2	1654	36	49533	Cluster-34894.101808,Cluster-34894.48561
GO:0019898	extrinsic component of membrane	cellular_component	0.34436	1	13	1654	335	49533	Cluster-34894.64041,Cluster-22213.1,Cluster-34894.98727,Cluster-34894.79588,Cluster-34894.30338,Cluster-34894.16182,Cluster-34894.57008,Cluster-34894.79917,Cluster-34894.81166,Cluster-34894.87268,Cluster-34894.99662,Cluster-34894.91575,Cluster-34894.15715
GO:0006544	glycine metabolic process	biological_process	0.34443	1	3	1654	58	49533	Cluster-34894.83331,Cluster-34894.99967,Cluster-34894.83329
GO:0006406	mRNA export from nucleus	biological_process	0.34449	1	3	1654	62	49533	Cluster-34894.80202,Cluster-34894.69437,Cluster-34894.91000
GO:0071166	ribonucleoprotein complex localization	biological_process	0.34449	1	3	1654	62	49533	Cluster-34894.91000,Cluster-34894.69437,Cluster-34894.80202
GO:0071426	ribonucleoprotein complex export from nucleus	biological_process	0.34449	1	3	1654	62	49533	Cluster-34894.69437,Cluster-34894.80202,Cluster-34894.91000
GO:0071427	mRNA-containing ribonucleoprotein complex export from nucleus	biological_process	0.34449	1	3	1654	62	49533	Cluster-34894.69437,Cluster-34894.80202,Cluster-34894.91000
GO:0042393	histone binding	molecular_function	0.34522	1	2	1654	32	49533	Cluster-34894.69999,Cluster-34894.60834
GO:0015144	carbohydrate transmembrane transporter activity	molecular_function	0.34537	1	4	1654	88	49533	Cluster-32401.0,Cluster-34894.85012,Cluster-34894.69101,Cluster-34894.101377
GO:1901476	carbohydrate transporter activity	molecular_function	0.34537	1	4	1654	88	49533	Cluster-32401.0,Cluster-34894.85012,Cluster-34894.69101,Cluster-34894.101377
GO:0019865	immunoglobulin binding	molecular_function	0.34649	1	1	1654	12	49533	Cluster-34894.95921
GO:0016874	ligase activity	molecular_function	0.34696	1	22	1654	564	49533	Cluster-34894.55961,Cluster-34894.99967,Cluster-34894.7571,Cluster-34894.104963,Cluster-34894.51934,Cluster-34894.46661,Cluster-34894.17294,Cluster-34894.19990,Cluster-34894.98975,Cluster-34894.14416,Cluster-34894.17292,Cluster-34894.55962,Cluster-34894.13879,Cluster-34894.50918,Cluster-34894.22436,Cluster-34894.61252,Cluster-16758.1,Cluster-34894.86735,Cluster-34894.61254,Cluster-34894.76650,Clu…
GO:0035251	UDP-glucosyltransferase activity	molecular_function	0.34762	1	2	1654	36	49533	Cluster-34894.13455,Cluster-34894.13456
GO:0044877	macromolecular complex binding	molecular_function	0.35072	1	30	1654	792	49533	Cluster-34894.64041,Cluster-22213.1,Cluster-34894.79586,Cluster-34894.68407,Cluster-34894.100921,Cluster-34894.36549,Cluster-34894.16712,Cluster-34894.16182,Cluster-34894.82207,Cluster-34894.19751,Cluster-34894.8057,Cluster-34894.17296,Cluster-34894.64310,Cluster-34894.102323,Cluster-34894.15715,Cluster-34894.78560,Cluster-34894.105470,Cluster-34894.14312,Cluster-34894.79588,Cluster-34894.78905,C…
GO:0051287	NAD binding	molecular_function	0.35171	1	8	1654	188	49533	Cluster-34894.54219,Cluster-34894.46259,Cluster-34894.59881,Cluster-34894.101694,Cluster-34894.61254,Cluster-34894.109466,Cluster-34894.61252,Cluster-34894.63117
GO:0045202	synapse	cellular_component	0.35204	1	2	1654	35	49533	Cluster-34894.24264,Cluster-34894.105318
GO:0007339	binding of sperm to zona pellucida	biological_process	0.35394	1	2	1654	34	49533	Cluster-34894.35116,Cluster-34894.69077
GO:0009988	cell-cell recognition	biological_process	0.35394	1	2	1654	34	49533	Cluster-34894.35116,Cluster-34894.69077
GO:0035036	sperm-egg recognition	biological_process	0.35394	1	2	1654	34	49533	Cluster-34894.35116,Cluster-34894.69077
GO:0042493	response to drug	biological_process	0.35511	1	2	1654	36	49533	Cluster-34894.61525,Cluster-34894.55671
GO:0015850	organic hydroxy compound transport	biological_process	0.35725	1	2	1654	38	49533	Cluster-34894.99500,Cluster-34894.27174
GO:0030684	preribosome	cellular_component	0.35758	1	8	1654	191	49533	Cluster-34894.50863,Cluster-34894.66591,Cluster-34894.242,Cluster-34894.58120,Cluster-34894.67786,Cluster-34894.105672,Cluster-34894.58719,Cluster-34894.58019
GO:1901682	sulfur compound transmembrane transporter activity	molecular_function	0.35813	1	2	1654	36	49533	Cluster-23506.0,Cluster-34894.50774
GO:0070585	protein localization to mitochondrion	biological_process	0.35906	1	3	1654	65	49533	Cluster-34894.29411,Cluster-34894.29410,Cluster-34894.15621
GO:0072655	establishment of protein localization to mitochondrion	biological_process	0.35906	1	3	1654	65	49533	Cluster-34894.29411,Cluster-34894.29410,Cluster-34894.15621
GO:0006473	protein acetylation	biological_process	0.35974	1	2	1654	37	49533	Cluster-34894.101808,Cluster-34894.48561
GO:0006475	internal protein amino acid acetylation	biological_process	0.35974	1	2	1654	37	49533	Cluster-34894.48561,Cluster-34894.101808
GO:0018393	internal peptidyl-lysine acetylation	biological_process	0.35974	1	2	1654	37	49533	Cluster-34894.101808,Cluster-34894.48561
GO:0018394	peptidyl-lysine acetylation	biological_process	0.35974	1	2	1654	37	49533	Cluster-34894.48561,Cluster-34894.101808
GO:0043543	protein acylation	biological_process	0.35974	1	2	1654	37	49533	Cluster-34894.48561,Cluster-34894.101808
GO:0030312	external encapsulating structure	cellular_component	0.36017	1	7	1654	174	49533	Cluster-34894.36640,Cluster-34894.46661,Cluster-34894.31051,Cluster-34894.11897,Cluster-34894.10499,Cluster-34894.68037,Cluster-34894.96944
GO:0005730	nucleolus	cellular_component	0.36093	1	21	1654	583	49533	Cluster-34894.90167,Cluster-34894.63010,Cluster-34894.60277,Cluster-34894.75218,Cluster-34894.38003,Cluster-34894.15292,Cluster-34894.50527,Cluster-34894.22821,Cluster-34894.63014,Cluster-34894.83425,Cluster-34894.60924,Cluster-34894.36187,Cluster-34894.84846,Cluster-34894.57438,Cluster-34894.35796,Cluster-34894.40392,Cluster-34894.62093,Cluster-34894.22823,Cluster-34894.44517,Cluster-34894.88457…
GO:0008239	dipeptidyl-peptidase activity	molecular_function	0.36146	1	2	1654	36	49533	Cluster-34894.14125,Cluster-34894.89318
GO:0003995	acyl-CoA dehydrogenase activity	molecular_function	0.36233	1	2	1654	33	49533	Cluster-34894.96945,Cluster-34894.16375
GO:0010562	positive regulation of phosphorus metabolic process	biological_process	0.36436	1	2	1654	40	49533	Cluster-34894.54542,Cluster-34894.49745
GO:0031401	positive regulation of protein modification process	biological_process	0.36436	1	2	1654	40	49533	Cluster-34894.49745,Cluster-34894.54542
GO:0045937	positive regulation of phosphate metabolic process	biological_process	0.36436	1	2	1654	40	49533	Cluster-34894.49745,Cluster-34894.54542
GO:0008593	regulation of Notch signaling pathway	biological_process	0.36524	1	1	1654	13	49533	Cluster-34894.56367
GO:0045747	positive regulation of Notch signaling pathway	biological_process	0.36524	1	1	1654	13	49533	Cluster-34894.56367
GO:0016011	dystroglycan complex	cellular_component	0.36532	1	2	1654	38	49533	Cluster-34894.100797,Cluster-34894.78970
GO:0016012	sarcoglycan complex	cellular_component	0.36532	1	2	1654	38	49533	Cluster-34894.78970,Cluster-34894.100797
GO:0030029	actin filament-based process	biological_process	0.36637	1	8	1654	195	49533	Cluster-34894.57548,Cluster-34894.13548,Cluster-34894.58030,Cluster-34894.43248,Cluster-34894.15712,Cluster-34894.66963,Cluster-34894.77674,Cluster-34894.103764
GO:0030036	actin cytoskeleton organization	biological_process	0.36637	1	8	1654	195	49533	Cluster-34894.15712,Cluster-34894.43248,Cluster-34894.58030,Cluster-34894.57548,Cluster-34894.13548,Cluster-34894.66963,Cluster-34894.77674,Cluster-34894.103764
GO:0033130	acetylcholine receptor binding	molecular_function	0.36676	1	1	1654	12	49533	Cluster-34894.29409
GO:0043495	protein anchor	molecular_function	0.36676	1	1	1654	12	49533	Cluster-34894.29409
GO:0032993	protein-DNA complex	cellular_component	0.36677	1	3	1654	65	49533	Cluster-34894.70309,Cluster-16853.1,Cluster-34894.87626
GO:0022604	regulation of cell morphogenesis	biological_process	0.36692	1	2	1654	39	49533	Cluster-34894.12862,Cluster-34894.59925
GO:0031423	hexon binding	molecular_function	0.36714	1	1	1654	12	49533	Cluster-34894.98327
GO:0015996	chlorophyll catabolic process	biological_process	0.36747	1	1	1654	12	49533	Cluster-34894.109736
GO:0047746	chlorophyllase activity	molecular_function	0.36747	1	1	1654	12	49533	Cluster-34894.109736
GO:0015016	[heparan sulfate]-glucosamine N-sulfotransferase activity	molecular_function	0.36781	1	1	1654	16	49533	Cluster-34894.85191
GO:0034483	heparan sulfate sulfotransferase activity	molecular_function	0.36781	1	1	1654	16	49533	Cluster-34894.85191
GO:0042710	biofilm formation	biological_process	0.36785	1	2	1654	36	49533	Cluster-17519.0,Cluster-24797.8
GO:0030054	cell junction	cellular_component	0.36819	1	4	1654	85	49533	Cluster-34894.57548,Cluster-34894.8591,Cluster-34894.8057,Cluster-34894.55958
GO:0032101	regulation of response to external stimulus	biological_process	0.36847	1	3	1654	61	49533	Cluster-34894.22770,Cluster-34894.60081,Cluster-18299.0
GO:0007016	cytoskeletal anchoring at plasma membrane	biological_process	0.36896	1	3	1654	62	49533	Cluster-34894.8591,Cluster-34894.65039,Cluster-34894.8057
GO:0044712	single-organism catabolic process	biological_process	0.36903	1	26	1654	677	49533	Cluster-34894.41486,Cluster-34894.56266,Cluster-34894.86397,Cluster-34894.96657,Cluster-34894.50285,Cluster-34894.63399,Cluster-34894.61254,Cluster-34894.59492,Cluster-34894.61252,Cluster-34894.53949,Cluster-34894.46408,Cluster-34894.27841,Cluster-34894.61730,Cluster-34894.109736,Cluster-12597.1,Cluster-34894.59652,Cluster-34894.7650,Cluster-34894.42545,Cluster-34894.63617,Cluster-34894.99221,Clu…
GO:0016682	oxidoreductase activity, acting on diphenols and related substances as donors, oxygen as acceptor	molecular_function	0.36971	1	2	1654	37	49533	Cluster-34894.44206,Cluster-34894.16125
GO:0006778	porphyrin-containing compound metabolic process	biological_process	0.36983	1	7	1654	160	49533	Cluster-34894.82976,Cluster-34894.77308,Cluster-34894.61252,Cluster-34894.92197,Cluster-34894.101694,Cluster-34894.61254,Cluster-34894.109736
GO:0001501	skeletal system development	biological_process	0.37022	1	1	1654	12	49533	Cluster-34894.82713
GO:0002062	chondrocyte differentiation	biological_process	0.37022	1	1	1654	12	49533	Cluster-34894.82713
GO:0035988	chondrocyte proliferation	biological_process	0.37022	1	1	1654	12	49533	Cluster-34894.82713
GO:0051216	cartilage development	biological_process	0.37022	1	1	1654	12	49533	Cluster-34894.82713
GO:0061448	connective tissue development	biological_process	0.37022	1	1	1654	12	49533	Cluster-34894.82713
GO:0001775	cell activation	biological_process	0.37069	1	15	1654	401	49533	Cluster-34894.15898,Cluster-34894.17019,Cluster-34894.19751,Cluster-34894.45995,Cluster-34894.38829,Cluster-34894.22821,Cluster-34894.21275,Cluster-34894.59925,Cluster-14514.0,Cluster-34894.24264,Cluster-34894.15713,Cluster-34894.24432,Cluster-34894.16182,Cluster-34894.60834,Cluster-34894.17915
GO:0005666	DNA-directed RNA polymerase III complex	cellular_component	0.37108	1	2	1654	37	49533	Cluster-34894.83425,Cluster-34894.60277
GO:0043566	structure-specific DNA binding	molecular_function	0.37186	1	7	1654	170	49533	Cluster-34894.46259,Cluster-34894.41957,Cluster-34894.82976,Cluster-34894.95221,Cluster-34894.60834,Cluster-34894.93597,Cluster-34894.27841
GO:0004806	triglyceride lipase activity	molecular_function	0.37235	1	1	1654	12	49533	Cluster-34894.79063
GO:0007265	Ras protein signal transduction	biological_process	0.37237	1	9	1654	210	49533	Cluster-34894.73279,Cluster-34894.89541,Cluster-13907.0,Cluster-34894.93280,Cluster-34894.96661,Cluster-34894.9314,Cluster-34894.5263,Cluster-34894.88440,Cluster-34894.97991
GO:0046578	regulation of Ras protein signal transduction	biological_process	0.37237	1	9	1654	210	49533	Cluster-34894.73279,Cluster-34894.89541,Cluster-13907.0,Cluster-34894.93280,Cluster-34894.5263,Cluster-34894.88440,Cluster-34894.97991,Cluster-34894.9314,Cluster-34894.96661
GO:0072350	tricarboxylic acid metabolic process	biological_process	0.3749	1	3	1654	60	49533	Cluster-34894.59881,Cluster-34894.41391,Cluster-34894.29908
GO:0016301	kinase activity	molecular_function	0.37527	1	98	1654	2770	49533	Cluster-19987.1,Cluster-34894.86322,Cluster-34345.0,Cluster-34894.10023,Cluster-34894.21077,Cluster-34894.76226,Cluster-34894.25219,Cluster-34894.104963,Cluster-34894.48260,Cluster-34894.78970,Cluster-34894.81215,Cluster-34894.14716,Cluster-34894.15343,Cluster-34894.45762,Cluster-34894.16712,Cluster-34894.11711,Cluster-34894.27829,Cluster-34894.17432,Cluster-34894.53542,Cluster-34894.19109,Cluste…
GO:0019208	phosphatase regulator activity	molecular_function	0.37603	1	2	1654	35	49533	Cluster-34894.60187,Cluster-34894.60188
GO:0010277	chlorophyllide a oxygenase [overall] activity	molecular_function	0.3761	1	1	1654	14	49533	Cluster-34894.19990
GO:0009424	bacterial-type flagellum hook	cellular_component	0.37633	1	2	1654	40	49533	Cluster-34894.78240,Cluster-34894.46289
GO:0034599	cellular response to oxidative stress	biological_process	0.37909	1	1	1654	15	49533	Cluster-34894.60277
GO:0003896	DNA primase activity	molecular_function	0.37922	1	4	1654	85	49533	Cluster-34894.63014,Cluster-34894.44517,Cluster-34894.40392,Cluster-34894.64310
GO:0044431	Golgi apparatus part	cellular_component	0.38031	1	11	1654	282	49533	Cluster-34894.32549,Cluster-34894.19751,Cluster-34894.34704,Cluster-34894.101377,Cluster-34894.53919,Cluster-34894.85012,Cluster-34894.13896,Cluster-34894.52934,Cluster-29404.0,Cluster-34894.49352,Cluster-32401.0
GO:0006396	RNA processing	biological_process	0.38125	1	46	1654	1240	49533	Cluster-34894.58719,Cluster-34894.105672,Cluster-34894.81644,Cluster-34894.42954,Cluster-34894.41191,Cluster-34894.25010,Cluster-34894.67786,Cluster-34894.71301,Cluster-34894.81176,Cluster-24315.0,Cluster-34894.84117,Cluster-34894.101047,Cluster-34894.54219,Cluster-34894.15239,Cluster-34894.61252,Cluster-34894.96990,Cluster-34894.15653,Cluster-34894.95237,Cluster-34894.41687,Cluster-34894.92978,C…
GO:0051056	regulation of small GTPase mediated signal transduction	biological_process	0.38306	1	10	1654	235	49533	Cluster-34894.73279,Cluster-13907.0,Cluster-34894.93280,Cluster-34894.89541,Cluster-34894.5263,Cluster-34894.88440,Cluster-34894.97991,Cluster-34894.96661,Cluster-34894.85328,Cluster-34894.9314
GO:0005085	guanyl-nucleotide exchange factor activity	molecular_function	0.38495	1	13	1654	319	49533	Cluster-34894.73279,Cluster-34894.93280,Cluster-13907.0,Cluster-34894.89541,Cluster-34894.39409,Cluster-34894.9314,Cluster-34894.81524,Cluster-34894.96661,Cluster-34894.81525,Cluster-34894.45734,Cluster-34894.88440,Cluster-34894.5263,Cluster-34894.97991
GO:0006097	glyoxylate cycle	biological_process	0.38558	1	1	1654	14	49533	Cluster-34894.71967
GO:0004014	adenosylmethionine decarboxylase activity	molecular_function	0.38674	1	1	1654	15	49533	Cluster-34894.38742
GO:0008216	spermidine metabolic process	biological_process	0.38674	1	1	1654	15	49533	Cluster-34894.38742
GO:0008295	spermidine biosynthetic process	biological_process	0.38674	1	1	1654	15	49533	Cluster-34894.38742
GO:0051220	cytoplasmic sequestering of protein	biological_process	0.38737	1	2	1654	33	49533	Cluster-34894.90646,Cluster-34894.32737
GO:0006188	IMP biosynthetic process	biological_process	0.38793	1	1	1654	14	49533	Cluster-34894.50918
GO:0046040	IMP metabolic process	biological_process	0.38793	1	1	1654	14	49533	Cluster-34894.50918
GO:0015238	drug transmembrane transporter activity	molecular_function	0.38811	1	2	1654	37	49533	Cluster-34894.55671,Cluster-34894.61525
GO:0090484	drug transporter activity	molecular_function	0.38811	1	2	1654	37	49533	Cluster-34894.55671,Cluster-34894.61525
GO:0000279	M phase	biological_process	0.3882	1	3	1654	66	49533	Cluster-34894.19751,Cluster-34894.16182,Cluster-34894.96049
GO:0022403	cell cycle phase	biological_process	0.3882	1	3	1654	66	49533	Cluster-34894.96049,Cluster-34894.16182,Cluster-34894.19751
GO:0044848	biological phase	biological_process	0.3882	1	3	1654	66	49533	Cluster-34894.16182,Cluster-34894.96049,Cluster-34894.19751
GO:0044033	multi-organism metabolic process	biological_process	0.38952	1	5	1654	114	49533	Cluster-34894.41361,Cluster-34894.89318,Cluster-34894.14125,Cluster-34894.79692,Cluster-34894.61808
GO:0006887	exocytosis	biological_process	0.3902	1	7	1654	173	49533	Cluster-34894.41362,Cluster-33544.0,Cluster-34894.16252,Cluster-34894.82431,Cluster-34894.56107,Cluster-34894.96049,Cluster-34894.41361
GO:0001848	complement binding	molecular_function	0.39166	1	1	1654	13	49533	Cluster-34894.92237
GO:0033176	proton-transporting V-type ATPase complex	cellular_component	0.39348	1	11	1654	286	49533	Cluster-34894.100528,Cluster-34894.79588,Cluster-34894.97722,Cluster-34894.72073,Cluster-34894.90034,Cluster-34894.47234,Cluster-34894.15898,Cluster-34894.18055,Cluster-34894.46259,Cluster-34894.76583,Cluster-34894.40744
GO:0030042	actin filament depolymerization	biological_process	0.39354	1	2	1654	38	49533	Cluster-34894.77674,Cluster-34894.43248
GO:0030834	regulation of actin filament depolymerization	biological_process	0.39354	1	2	1654	38	49533	Cluster-34894.77674,Cluster-34894.43248
GO:0030835	negative regulation of actin filament depolymerization	biological_process	0.39354	1	2	1654	38	49533	Cluster-34894.77674,Cluster-34894.43248
GO:0030837	negative regulation of actin filament polymerization	biological_process	0.39354	1	2	1654	38	49533	Cluster-34894.77674,Cluster-34894.43248
GO:0031333	negative regulation of protein complex assembly	biological_process	0.39354	1	2	1654	38	49533	Cluster-34894.77674,Cluster-34894.43248
GO:0032272	negative regulation of protein polymerization	biological_process	0.39354	1	2	1654	38	49533	Cluster-34894.77674,Cluster-34894.43248
GO:0043242	negative regulation of protein complex disassembly	biological_process	0.39354	1	2	1654	38	49533	Cluster-34894.77674,Cluster-34894.43248
GO:0051261	protein depolymerization	biological_process	0.39354	1	2	1654	38	49533	Cluster-34894.43248,Cluster-34894.77674
GO:0051693	actin filament capping	biological_process	0.39354	1	2	1654	38	49533	Cluster-34894.43248,Cluster-34894.77674
GO:1901879	regulation of protein depolymerization	biological_process	0.39354	1	2	1654	38	49533	Cluster-34894.43248,Cluster-34894.77674
GO:1901880	negative regulation of protein depolymerization	biological_process	0.39354	1	2	1654	38	49533	Cluster-34894.77674,Cluster-34894.43248
GO:0016772	transferase activity, transferring phosphorus-containing groups	molecular_function	0.39381	1	143	1654	4075	49533	Cluster-34894.19108,Cluster-34894.22823,Cluster-34894.97671,Cluster-34894.21351,Cluster-34894.107068,Cluster-34894.17060,Cluster-34894.90725,Cluster-34894.60924,Cluster-34894.76188,Cluster-34894.45376,Cluster-22875.0,Cluster-34894.24887,Cluster-34894.102600,Cluster-34894.84881,Cluster-34894.81865,Cluster-34894.60277,Cluster-34894.71563,Cluster-34894.26752,Cluster-34894.14337,Cluster-34894.75218,C…
GO:0008378	galactosyltransferase activity	molecular_function	0.39472	1	3	1654	60	49533	Cluster-34894.24533,Cluster-34894.24538,Cluster-34894.29152
GO:0006595	polyamine metabolic process	biological_process	0.39566	1	1	1654	16	49533	Cluster-34894.38742
GO:0006596	polyamine biosynthetic process	biological_process	0.39566	1	1	1654	16	49533	Cluster-34894.38742
GO:0016837	carbon-oxygen lyase activity, acting on polysaccharides	molecular_function	0.39761	1	1	1654	14	49533	Cluster-34894.87239
GO:0005785	signal recognition particle receptor complex	cellular_component	0.39825	1	2	1654	40	49533	Cluster-34894.102323,Cluster-34894.64310
GO:0042151	nematocyst	cellular_component	0.39917	1	1	1654	16	49533	Cluster-34894.66808
GO:0032040	small-subunit processome	cellular_component	0.39936	1	7	1654	173	49533	Cluster-34894.58019,Cluster-34894.242,Cluster-34894.105672,Cluster-34894.66591,Cluster-34894.67786,Cluster-34894.50863,Cluster-34894.58120
GO:0009847	spore germination	biological_process	0.40254	1	2	1654	38	49533	Cluster-34894.46259,Cluster-34894.63200
GO:0006269	DNA replication, synthesis of RNA primer	biological_process	0.40256	1	4	1654	88	49533	Cluster-34894.64310,Cluster-34894.63014,Cluster-34894.40392,Cluster-34894.44517
GO:0008484	sulfuric ester hydrolase activity	molecular_function	0.40295	1	2	1654	32	49533	Cluster-34894.58725,Cluster-34894.6051
GO:0007007	inner mitochondrial membrane organization	biological_process	0.40297	1	1	1654	15	49533	Cluster-34894.22821
GO:0042407	cristae formation	biological_process	0.40297	1	1	1654	15	49533	Cluster-34894.22821
GO:0044284	mitochondrial crista junction	cellular_component	0.40297	1	1	1654	15	49533	Cluster-34894.22821
GO:0061617	MICOS complex	cellular_component	0.40297	1	1	1654	15	49533	Cluster-34894.22821
GO:0016972	thiol oxidase activity	molecular_function	0.40305	1	4	1654	98	49533	Cluster-34894.48650,Cluster-34894.79063,Cluster-34894.66259,Cluster-34671.1
GO:0006904	vesicle docking involved in exocytosis	biological_process	0.40316	1	4	1654	92	49533	Cluster-34894.41362,Cluster-33544.0,Cluster-34894.96049,Cluster-34894.41361
GO:0060478	acrosomal vesicle exocytosis	biological_process	0.40402	1	1	1654	19	49533	Cluster-34894.82431
GO:0006749	glutathione metabolic process	biological_process	0.40472	1	4	1654	91	49533	Cluster-34894.58719,Cluster-34894.22436,Cluster-34894.81829,Cluster-34894.75349
GO:0016638	oxidoreductase activity, acting on the CH-NH2 group of donors	molecular_function	0.40509	1	4	1654	91	49533	Cluster-36750.0,Cluster-34894.16629,Cluster-34894.38023,Cluster-34894.99559
GO:0033202	DNA helicase complex	cellular_component	0.40551	1	4	1654	86	49533	Cluster-34894.107068,Cluster-34894.76815,Cluster-26628.0,Cluster-34894.95237
GO:0003873	6-phosphofructo-2-kinase activity	molecular_function	0.40557	1	2	1654	38	49533	Cluster-34894.52311,Cluster-34894.15240
GO:0003725	double-stranded RNA binding	molecular_function	0.40577	1	1	1654	14	49533	Cluster-34894.63892
GO:0051181	cofactor transport	biological_process	0.406	1	4	1654	93	49533	Cluster-34894.5266,Cluster-34894.50527,Cluster-34894.88450,Cluster-34894.70713
GO:0016728	oxidoreductase activity, acting on CH or CH2 groups, disulfide as acceptor	molecular_function	0.40642	1	1	1654	15	49533	Cluster-34894.38003
GO:0009219	pyrimidine deoxyribonucleotide metabolic process	biological_process	0.40758	1	2	1654	38	49533	Cluster-34894.102709,Cluster-34894.17808
GO:0050497	transferase activity, transferring alkylthio groups	molecular_function	0.40803	1	1	1654	15	49533	Cluster-16718.0
GO:0050524	coenzyme-B sulfoethylthiotransferase activity	molecular_function	0.40803	1	1	1654	15	49533	Cluster-16718.0
GO:0009166	nucleotide catabolic process	biological_process	0.4114	1	1	1654	14	49533	Cluster-34894.46408
GO:0016872	intramolecular lyase activity	molecular_function	0.41205	1	1	1654	14	49533	Cluster-34894.59625
GO:0006000	fructose metabolic process	biological_process	0.41263	1	5	1654	120	49533	Cluster-34894.52311,Cluster-34894.67287,Cluster-12597.1,Cluster-34894.97051,Cluster-34894.15240
GO:0008037	cell recognition	biological_process	0.41375	1	2	1654	39	49533	Cluster-34894.69077,Cluster-34894.35116
GO:0016780	phosphotransferase activity, for other substituted phosphate groups	molecular_function	0.41426	1	2	1654	38	49533	Cluster-34894.84881,Cluster-34894.84875
GO:0030472	mitotic spindle organization in nucleus	biological_process	0.41683	1	1	1654	17	49533	Cluster-34894.19751
GO:0006305	DNA alkylation	biological_process	0.41722	1	2	1654	41	49533	Cluster-34894.74878,Cluster-34894.75683
GO:0006306	DNA methylation	biological_process	0.41722	1	2	1654	41	49533	Cluster-34894.75683,Cluster-34894.74878
GO:0044728	DNA methylation or demethylation	biological_process	0.41722	1	2	1654	41	49533	Cluster-34894.74878,Cluster-34894.75683
GO:0009394	2'-deoxyribonucleotide metabolic process	biological_process	0.41722	1	2	1654	39	49533	Cluster-34894.102709,Cluster-34894.17808
GO:0019692	deoxyribose phosphate metabolic process	biological_process	0.41722	1	2	1654	39	49533	Cluster-34894.102709,Cluster-34894.17808
GO:0009295	nucleoid	cellular_component	0.41726	1	1	1654	16	49533	Cluster-34894.92936
GO:1901700	response to oxygen-containing compound	biological_process	0.41845	1	4	1654	100	49533	Cluster-34894.29908,Cluster-34894.16163,Cluster-34894.59585,Cluster-34894.29907
GO:0008536	Ran GTPase binding	molecular_function	0.41878	1	2	1654	38	49533	Cluster-34894.95778,Cluster-34894.67851
GO:0006730	one-carbon metabolic process	biological_process	0.41961	1	2	1654	44	49533	Cluster-34894.33912,Cluster-34894.101694
GO:0006364	rRNA processing	biological_process	0.41988	1	7	1654	171	49533	Cluster-34894.67786,Cluster-34894.105672,Cluster-34894.58719,Cluster-34894.41191,Cluster-34894.242,Cluster-34894.63014,Cluster-34894.41687
GO:0016072	rRNA metabolic process	biological_process	0.41988	1	7	1654	171	49533	Cluster-34894.41191,Cluster-34894.63014,Cluster-34894.41687,Cluster-34894.242,Cluster-34894.105672,Cluster-34894.58719,Cluster-34894.67786
GO:0004357	glutamate-cysteine ligase activity	molecular_function	0.42027	1	1	1654	15	49533	Cluster-34894.22436
GO:0017109	glutamate-cysteine ligase complex	cellular_component	0.42027	1	1	1654	15	49533	Cluster-34894.22436
GO:0005938	cell cortex	cellular_component	0.42045	1	12	1654	310	49533	Cluster-34894.96049,Cluster-34894.90646,Cluster-34894.16182,Cluster-34894.32737,Cluster-34894.41361,Cluster-34894.56107,Cluster-34894.63685,Cluster-34894.60314,Cluster-34894.66808,Cluster-33544.0,Cluster-34894.41362,Cluster-34894.12066
GO:0005578	proteinaceous extracellular matrix	cellular_component	0.42168	1	10	1654	251	49533	Cluster-34894.26268,Cluster-34894.101009,Cluster-34894.7650,Cluster-34894.46151,Cluster-34894.18055,Cluster-34894.13380,Cluster-18299.0,Cluster-34894.23317,Cluster-34894.7647,Cluster-34894.11114
GO:0044743	intracellular protein transmembrane import	biological_process	0.42185	1	3	1654	69	49533	Cluster-34894.29411,Cluster-34894.29410,Cluster-34894.15621
GO:0065002	intracellular protein transmembrane transport	biological_process	0.42185	1	3	1654	69	49533	Cluster-34894.29410,Cluster-34894.29411,Cluster-34894.15621
GO:0097164	ammonium ion metabolic process	biological_process	0.42235	1	1	1654	17	49533	Cluster-34894.38742
GO:0046149	pigment catabolic process	biological_process	0.42253	1	1	1654	14	49533	Cluster-34894.109736
GO:0048029	monosaccharide binding	molecular_function	0.42269	1	1	1654	14	49533	Cluster-18299.0
GO:0006026	aminoglycan catabolic process	biological_process	0.42389	1	3	1654	70	49533	Cluster-34894.14094,Cluster-34894.18400,Cluster-34894.29731
GO:0010468	regulation of gene expression	biological_process	0.42433	1	162	1654	4593	49533	Cluster-34894.54883,Cluster-34894.45429,Cluster-34894.44965,Cluster-34894.35796,Cluster-34894.78752,Cluster-34894.64310,Cluster-34894.2329,Cluster-34894.43248,Cluster-34894.92978,Cluster-34894.42568,Cluster-34894.75683,Cluster-34894.101777,Cluster-34894.14416,Cluster-34894.97905,Cluster-34894.74878,Cluster-34894.36683,Cluster-34894.56478,Cluster-34894.100921,Cluster-34894.79586,Cluster-34894.2574…
GO:0016879	ligase activity, forming carbon-nitrogen bonds	molecular_function	0.42509	1	8	1654	201	49533	Cluster-34894.98975,Cluster-34894.17293,Cluster-34894.50918,Cluster-34894.22436,Cluster-34894.86735,Cluster-16758.1,Cluster-34894.7571,Cluster-34894.17292
GO:0042752	regulation of circadian rhythm	biological_process	0.42528	1	1	1654	14	49533	Cluster-34894.81610
GO:0042754	negative regulation of circadian rhythm	biological_process	0.42528	1	1	1654	14	49533	Cluster-34894.81610
GO:0008556	potassium-transporting ATPase activity	molecular_function	0.4255	1	1	1654	17	49533	Cluster-34894.22373
GO:0005758	mitochondrial intermembrane space	cellular_component	0.42593	1	1	1654	18	49533	Cluster-29366.0
GO:0016530	metallochaperone activity	molecular_function	0.42593	1	1	1654	18	49533	Cluster-29366.0
GO:0016531	copper chaperone activity	molecular_function	0.42593	1	1	1654	18	49533	Cluster-29366.0
GO:0031970	organelle envelope lumen	cellular_component	0.42593	1	1	1654	18	49533	Cluster-29366.0
GO:0007276	gamete generation	biological_process	0.42595	1	5	1654	127	49533	Cluster-34894.96944,Cluster-34894.70309,Cluster-34894.25747,Cluster-34894.51934,Cluster-34894.87626
GO:0007338	single fertilization	biological_process	0.42624	1	3	1654	70	49533	Cluster-34894.69077,Cluster-34894.35116,Cluster-34894.82431
GO:0009566	fertilization	biological_process	0.42624	1	3	1654	70	49533	Cluster-34894.69077,Cluster-34894.35116,Cluster-34894.82431
GO:0008290	F-actin capping protein complex	cellular_component	0.428	1	1	1654	16	49533	Cluster-34894.77674
GO:0006672	ceramide metabolic process	biological_process	0.42843	1	1	1654	15	49533	Cluster-34894.50285
GO:0031047	gene silencing by RNA	biological_process	0.42851	1	1	1654	16	49533	Cluster-34894.78867
GO:0009200	deoxyribonucleoside triphosphate metabolic process	biological_process	0.42884	1	1	1654	14	49533	Cluster-34894.102709
GO:0009211	pyrimidine deoxyribonucleoside triphosphate metabolic process	biological_process	0.42884	1	1	1654	14	49533	Cluster-34894.102709
GO:0046080	dUTP metabolic process	biological_process	0.42884	1	1	1654	14	49533	Cluster-34894.102709
GO:0004553	hydrolase activity, hydrolyzing O-glycosyl compounds	molecular_function	0.42887	1	18	1654	506	49533	Cluster-34894.14094,Cluster-34894.82089,Cluster-34894.17060,Cluster-34894.53323,Cluster-34894.56122,Cluster-37016.0,Cluster-34894.53327,Cluster-34894.91124,Cluster-34894.14429,Cluster-34894.6976,Cluster-34894.91749,Cluster-18299.0,Cluster-34894.98053,Cluster-34894.58614,Cluster-34894.54914,Cluster-34894.68258,Cluster-34894.50285,Cluster-34894.56121
GO:0044815	DNA packaging complex	cellular_component	0.42904	1	3	1654	71	49533	Cluster-34894.70309,Cluster-34894.87626,Cluster-16853.1
GO:0008081	phosphoric diester hydrolase activity	molecular_function	0.43092	1	7	1654	178	49533	Cluster-34894.104654,Cluster-34894.39771,Cluster-34894.21450,Cluster-34894.70803,Cluster-34894.46408,Cluster-34894.29377,Cluster-34894.89022
GO:0000155	phosphorelay sensor kinase activity	molecular_function	0.43151	1	3	1654	68	49533	Cluster-34894.48260,Cluster-34894.79917,Cluster-34345.0
GO:0006839	mitochondrial transport	biological_process	0.43259	1	3	1654	72	49533	Cluster-34894.15621,Cluster-34894.29411,Cluster-34894.29410
GO:0004683	calmodulin-dependent protein kinase activity	molecular_function	0.43278	1	1	1654	14	49533	Cluster-18203.0
GO:0030117	membrane coat	cellular_component	0.43334	1	18	1654	523	49533	Cluster-34894.34704,Cluster-34894.13896,Cluster-34894.68037,Cluster-34894.33082,Cluster-34894.81805,Cluster-34894.58445,Cluster-34894.26768,Cluster-34894.79358,Cluster-34894.79362,Cluster-34894.32549,Cluster-34894.16629,Cluster-34894.47996,Cluster-34894.85513,Cluster-34894.72073,Cluster-34894.29608,Cluster-34894.53919,Cluster-29404.0,Cluster-34894.33419
GO:0048475	coated membrane	cellular_component	0.43334	1	18	1654	523	49533	Cluster-29404.0,Cluster-34894.33419,Cluster-34894.29608,Cluster-34894.53919,Cluster-34894.72073,Cluster-34894.85513,Cluster-34894.47996,Cluster-34894.16629,Cluster-34894.79362,Cluster-34894.32549,Cluster-34894.79358,Cluster-34894.58445,Cluster-34894.26768,Cluster-34894.33082,Cluster-34894.81805,Cluster-34894.13896,Cluster-34894.68037,Cluster-34894.34704
GO:0003746	translation elongation factor activity	molecular_function	0.43405	1	2	1654	42	49533	Cluster-30483.0,Cluster-34894.44517
GO:0016485	protein processing	biological_process	0.43421	1	7	1654	178	49533	Cluster-34894.14125,Cluster-34894.70803,Cluster-34894.49047,Cluster-34894.89318,Cluster-34894.41361,Cluster-34894.9314,Cluster-34894.58896
GO:0051604	protein maturation	biological_process	0.43421	1	7	1654	178	49533	Cluster-34894.49047,Cluster-34894.89318,Cluster-34894.41361,Cluster-34894.14125,Cluster-34894.70803,Cluster-34894.9314,Cluster-34894.58896
GO:0017153	sodium:dicarboxylate symporter activity	molecular_function	0.43578	1	1	1654	14	49533	Cluster-34894.15804
GO:0033821	DNA beta-glucosyltransferase activity	molecular_function	0.4364	1	1	1654	16	49533	Cluster-34894.43319
GO:0006298	mismatch repair	biological_process	0.43653	1	3	1654	72	49533	Cluster-34894.27841,Cluster-34894.93597,Cluster-34894.41957
GO:0006913	nucleocytoplasmic transport	biological_process	0.43661	1	15	1654	417	49533	Cluster-34894.91000,Cluster-34894.68407,Cluster-34894.26884,Cluster-34894.21651,Cluster-34894.69437,Cluster-34894.16182,Cluster-34894.72073,Cluster-34894.14832,Cluster-34894.15714,Cluster-34894.96049,Cluster-34894.10023,Cluster-34894.69959,Cluster-34894.75421,Cluster-34894.95221,Cluster-34894.80202
GO:0005921	gap junction	cellular_component	0.43749	1	1	1654	14	49533	Cluster-34894.55958
GO:0045595	regulation of cell differentiation	biological_process	0.43771	1	1	1654	18	49533	Cluster-34894.31620
GO:0015696	ammonium transport	biological_process	0.43828	1	1	1654	16	49533	Cluster-34894.22343
GO:0004100	chitin synthase activity	molecular_function	0.43846	1	1	1654	14	49533	Cluster-34894.55056
GO:0006031	chitin biosynthetic process	biological_process	0.43846	1	1	1654	14	49533	Cluster-34894.55056
GO:0046349	amino sugar biosynthetic process	biological_process	0.43846	1	1	1654	14	49533	Cluster-34894.55056
GO:1901073	glucosamine-containing compound biosynthetic process	biological_process	0.43846	1	1	1654	14	49533	Cluster-34894.55056
GO:0009262	deoxyribonucleotide metabolic process	biological_process	0.43957	1	2	1654	41	49533	Cluster-34894.102709,Cluster-34894.17808
GO:0030337	DNA polymerase processivity factor activity	molecular_function	0.43977	1	1	1654	17	49533	Cluster-34894.46732
GO:0042025	host cell nucleus	cellular_component	0.44116	1	9	1654	243	49533	Cluster-34894.75421,Cluster-34894.26268,Cluster-34894.46098,Cluster-34894.66808,Cluster-34894.98268,Cluster-34894.61988,Cluster-34894.42568,Cluster-34894.53033,Cluster-34894.25247
GO:0043087	regulation of GTPase activity	biological_process	0.44175	1	15	1654	386	49533	Cluster-34894.73279,Cluster-34894.109762,Cluster-13907.0,Cluster-34894.89541,Cluster-34894.93280,Cluster-34894.39409,Cluster-34894.5263,Cluster-34894.88440,Cluster-34894.97991,Cluster-34894.81524,Cluster-34894.81525,Cluster-34894.96661,Cluster-34894.9314,Cluster-34894.45734,Cluster-34894.15299
GO:0009892	negative regulation of metabolic process	biological_process	0.44333	1	12	1654	326	49533	Cluster-19183.0,Cluster-34894.17604,Cluster-34894.81610,Cluster-34894.101011,Cluster-34894.6241,Cluster-34894.2329,Cluster-34894.70840,Cluster-34894.71563,Cluster-34894.78867,Cluster-34894.51255,Cluster-34894.98656,Cluster-34894.13664
GO:0008131	primary amine oxidase activity	molecular_function	0.44338	1	1	1654	17	49533	Cluster-36750.0
GO:0031369	translation initiation factor binding	molecular_function	0.44402	1	2	1654	44	49533	Cluster-34894.2329,Cluster-34894.98656
GO:0007591	molting cycle, chitin-based cuticle	biological_process	0.44407	1	1	1654	15	49533	Cluster-34894.99031
GO:0008255	ecdysis-triggering hormone activity	molecular_function	0.44407	1	1	1654	15	49533	Cluster-34894.99031
GO:0018990	ecdysis, chitin-based cuticle	biological_process	0.44407	1	1	1654	15	49533	Cluster-34894.99031
GO:0022404	molting cycle process	biological_process	0.44407	1	1	1654	15	49533	Cluster-34894.99031
GO:0042303	molting cycle	biological_process	0.44407	1	1	1654	15	49533	Cluster-34894.99031
GO:0004860	protein kinase inhibitor activity	molecular_function	0.44463	1	3	1654	64	49533	Cluster-34894.65876,Cluster-25895.1,Cluster-34894.70046
GO:0019210	kinase inhibitor activity	molecular_function	0.44463	1	3	1654	64	49533	Cluster-34894.70046,Cluster-25895.1,Cluster-34894.65876
GO:0005047	signal recognition particle binding	molecular_function	0.44492	1	2	1654	43	49533	Cluster-34894.102323,Cluster-34894.64310
GO:0016798	hydrolase activity, acting on glycosyl bonds	molecular_function	0.44516	1	20	1654	568	49533	Cluster-34894.56121,Cluster-34894.50285,Cluster-34894.14402,Cluster-34894.54914,Cluster-34894.58614,Cluster-34894.68258,Cluster-34894.6976,Cluster-34894.98053,Cluster-18299.0,Cluster-34894.91749,Cluster-34894.14429,Cluster-34894.91124,Cluster-34894.53327,Cluster-36048.0,Cluster-34894.17060,Cluster-34894.56122,Cluster-37016.0,Cluster-34894.53323,Cluster-34894.82089,Cluster-34894.14094
GO:0019076	viral release from host cell	biological_process	0.4456	1	4	1654	104	49533	Cluster-34894.61988,Cluster-34894.51497,Cluster-34894.58314,Cluster-34894.98268
GO:0019073	viral DNA genome packaging	biological_process	0.44613	1	1	1654	16	49533	Cluster-34894.79692
GO:1902590	multi-organism organelle organization	biological_process	0.44613	1	1	1654	16	49533	Cluster-34894.79692
GO:0007283	spermatogenesis	biological_process	0.44704	1	3	1654	73	49533	Cluster-34894.25747,Cluster-34894.70309,Cluster-34894.87626
GO:0048232	male gamete generation	biological_process	0.44704	1	3	1654	73	49533	Cluster-34894.70309,Cluster-34894.25747,Cluster-34894.87626
GO:0019882	antigen processing and presentation	biological_process	0.44745	1	3	1654	70	49533	Cluster-34894.75395,Cluster-34894.15556,Cluster-34894.81721
GO:0016604	nuclear body	cellular_component	0.44768	1	1	1654	15	49533	Cluster-34894.50596
GO:0016607	nuclear speck	cellular_component	0.44768	1	1	1654	15	49533	Cluster-34894.50596
GO:0004601	peroxidase activity	molecular_function	0.44818	1	2	1654	45	49533	Cluster-34894.86389,Cluster-34894.75349
GO:0006804	obsolete peroxidase reaction	biological_process	0.44818	1	2	1654	45	49533	Cluster-34894.86389,Cluster-34894.75349
GO:0006090	pyruvate metabolic process	biological_process	0.44996	1	13	1654	367	49533	Cluster-34894.86397,Cluster-34894.37600,Cluster-34894.43602,Cluster-34894.29908,Cluster-12597.1,Cluster-34894.66806,Cluster-34894.13879,Cluster-34894.59866,Cluster-34894.35111,Cluster-34894.17291,Cluster-34894.59881,Cluster-34894.76650,Cluster-34894.17294
GO:0040029	regulation of gene expression, epigenetic	biological_process	0.45102	1	2	1654	45	49533	Cluster-34894.74878,Cluster-34894.75683
GO:0080134	regulation of response to stress	biological_process	0.45156	1	4	1654	97	49533	Cluster-34894.22770,Cluster-18299.0,Cluster-34894.60081,Cluster-34894.16163
GO:0003779	actin binding	molecular_function	0.45308	1	15	1654	404	49533	Cluster-34894.13640,Cluster-34894.58030,Cluster-34894.27309,Cluster-34894.57548,Cluster-34894.53542,Cluster-34894.57823,Cluster-34894.17120,Cluster-34894.73861,Cluster-34894.66963,Cluster-34894.103764,Cluster-34894.63287,Cluster-34894.8591,Cluster-34894.96476,Cluster-34894.96484,Cluster-34894.65036
GO:0030269	tetrahydromethanopterin S-methyltransferase activity	molecular_function	0.45351	1	2	1654	45	49533	Cluster-34894.95221,Cluster-34894.8401
GO:0042086	5-methyl-5,6,7,8-tetrahydromethanopterin-dependent methyltransferase activity	molecular_function	0.45351	1	2	1654	45	49533	Cluster-34894.95221,Cluster-34894.8401
GO:0016670	oxidoreductase activity, acting on a sulfur group of donors, oxygen as acceptor	molecular_function	0.45457	1	4	1654	104	49533	Cluster-34671.1,Cluster-34894.66259,Cluster-34894.79063,Cluster-34894.48650
GO:0003743	translation initiation factor activity	molecular_function	0.45493	1	6	1654	160	49533	Cluster-34894.17406,Cluster-34894.104224,Cluster-34894.7298,Cluster-34894.93414,Cluster-34894.53349,Cluster-34894.54655
GO:0048278	vesicle docking	biological_process	0.45493	1	4	1654	99	49533	Cluster-34894.41361,Cluster-34894.96049,Cluster-33544.0,Cluster-34894.41362
GO:0034755	iron ion transmembrane transport	biological_process	0.45536	1	1	1654	19	49533	Cluster-34894.42514
GO:0003724	RNA helicase activity	molecular_function	0.45558	1	7	1654	177	49533	Cluster-34894.26752,Cluster-34894.29868,Cluster-34894.7700,Cluster-26628.0,Cluster-34894.81176,Cluster-34894.32236,Cluster-34894.15653
GO:0016310	phosphorylation	biological_process	0.4561	1	89	1654	2467	49533	Cluster-34894.35505,Cluster-34894.90581,Cluster-34894.29020,Cluster-34894.14205,Cluster-34894.82882,Cluster-34894.34030,Cluster-34894.70508,Cluster-34894.69855,Cluster-34894.72520,Cluster-34894.22526,Cluster-34894.17808,Cluster-34894.77939,Cluster-34894.75683,Cluster-34894.15889,Cluster-34894.102496,Cluster-34894.76798,Cluster-34894.42178,Cluster-34894.79917,Cluster-34894.44206,Cluster-34894.8554…
GO:0052646	alditol phosphate metabolic process	biological_process	0.45651	1	2	1654	43	49533	Cluster-34894.61254,Cluster-34894.61252
GO:0005886	plasma membrane	cellular_component	0.45981	1	46	1654	1319	49533	Cluster-34894.54905,Cluster-34894.45300,Cluster-34894.51497,Cluster-34894.59586,Cluster-34894.50527,Cluster-34894.32549,Cluster-34894.100723,Cluster-29404.0,Cluster-34894.60277,Cluster-34894.99500,Cluster-34894.81721,Cluster-34894.54578,Cluster-34894.65879,Cluster-34894.100797,Cluster-34894.58281,Cluster-34894.78970,Cluster-34894.37600,Cluster-34894.82170,Cluster-34894.56478,Cluster-34894.15712,C…
GO:0005882	intermediate filament	cellular_component	0.45992	1	11	1654	296	49533	Cluster-34894.15712,Cluster-14514.0,Cluster-34894.44960,Cluster-34894.98727,Cluster-34894.15713,Cluster-34894.15714,Cluster-34894.50833,Cluster-34894.101008,Cluster-34894.78970,Cluster-34894.21275,Cluster-34894.15715
GO:0045111	intermediate filament cytoskeleton	cellular_component	0.45992	1	11	1654	296	49533	Cluster-34894.15714,Cluster-34894.50833,Cluster-34894.44960,Cluster-34894.15713,Cluster-34894.98727,Cluster-34894.15712,Cluster-14514.0,Cluster-34894.15715,Cluster-34894.78970,Cluster-34894.21275,Cluster-34894.101008
GO:0005540	hyaluronic acid binding	molecular_function	0.45993	1	2	1654	42	49533	Cluster-34894.29731,Cluster-35241.0
GO:0006098	pentose-phosphate shunt	biological_process	0.45997	1	5	1654	125	49533	Cluster-34894.61254,Cluster-34894.61730,Cluster-34894.81829,Cluster-34894.63117,Cluster-34894.61252
GO:0006629	lipid metabolic process	biological_process	0.46108	1	45	1654	1220	49533	Cluster-34894.60314,Cluster-34894.56369,Cluster-34894.58093,Cluster-34894.50285,Cluster-34894.77888,Cluster-34894.39771,Cluster-34894.13879,Cluster-34894.56266,Cluster-34894.61252,Cluster-34894.59492,Cluster-34894.53949,Cluster-34894.61733,Cluster-34894.61254,Cluster-34894.76650,Cluster-34894.42545,Cluster-34894.93453,Cluster-12597.1,Cluster-36520.1,Cluster-32090.1,Cluster-34894.58722,Cluster-348…
GO:0004668	protein-arginine deiminase activity	molecular_function	0.46122	1	1	1654	16	49533	Cluster-34894.2329
GO:0042995	cell projection	cellular_component	0.46347	1	17	1654	481	49533	Cluster-34894.49717,Cluster-34894.19751,Cluster-34894.8057,Cluster-34894.8591,Cluster-34894.15712,Cluster-14514.0,Cluster-34894.78240,Cluster-34894.67786,Cluster-34894.14094,Cluster-34894.46259,Cluster-34894.45300,Cluster-34894.15713,Cluster-34894.88538,Cluster-34894.98727,Cluster-34894.46289,Cluster-34894.96049,Cluster-34894.15714
GO:0008174	mRNA methyltransferase activity	molecular_function	0.46633	1	1	1654	17	49533	Cluster-34894.42954
GO:0043093	FtsZ-dependent cytokinesis	biological_process	0.46879	1	10	1654	272	49533	Cluster-34894.79588,Cluster-34894.80873,Cluster-34894.15712,Cluster-34894.16182,Cluster-34894.10023,Cluster-34894.48898,Cluster-34894.45995,Cluster-34894.15710,Cluster-34894.59925,Cluster-19252.0
GO:0000772	mating pheromone activity	molecular_function	0.46926	1	1	1654	22	49533	Cluster-34894.30338
GO:0016684	oxidoreductase activity, acting on peroxide as acceptor	molecular_function	0.46934	1	3	1654	74	49533	Cluster-34894.75349,Cluster-34894.86389,Cluster-25267.0
GO:0006979	response to oxidative stress	biological_process	0.47003	1	4	1654	105	49533	Cluster-34894.86389,Cluster-34894.75349,Cluster-34894.16163,Cluster-34894.60277
GO:0016071	mRNA metabolic process	biological_process	0.47011	1	21	1654	590	49533	Cluster-34894.1073,Cluster-34894.15239,Cluster-34894.101047,Cluster-25895.1,Cluster-34894.84117,Cluster-34894.102519,Cluster-34894.71301,Cluster-34894.22822,Cluster-34894.25010,Cluster-34894.42954,Cluster-34894.11548,Cluster-34894.93280,Cluster-34894.28879,Cluster-34894.99031,Cluster-34894.80154,Cluster-34894.45300,Cluster-34894.15887,Cluster-34894.57548,Cluster-34894.15889,Cluster-34894.30338,Cl…
GO:0003854	3-beta-hydroxy-delta5-steroid dehydrogenase activity	molecular_function	0.47036	1	2	1654	39	49533	Cluster-34894.61730,Cluster-34894.61733
GO:0008207	C21-steroid hormone metabolic process	biological_process	0.47036	1	2	1654	39	49533	Cluster-34894.61730,Cluster-34894.61733
GO:0008209	androgen metabolic process	biological_process	0.47036	1	2	1654	39	49533	Cluster-34894.61733,Cluster-34894.61730
GO:0008210	estrogen metabolic process	biological_process	0.47036	1	2	1654	39	49533	Cluster-34894.61730,Cluster-34894.61733
GO:0016229	steroid dehydrogenase activity	molecular_function	0.47036	1	2	1654	39	49533	Cluster-34894.61733,Cluster-34894.61730
GO:0033764	steroid dehydrogenase activity, acting on the CH-OH group of donors, NAD or NADP as acceptor	molecular_function	0.47036	1	2	1654	39	49533	Cluster-34894.61733,Cluster-34894.61730
GO:0031514	motile cilium	cellular_component	0.47115	1	10	1654	282	49533	Cluster-34894.49717,Cluster-34894.46259,Cluster-34894.45300,Cluster-34894.19751,Cluster-34894.96049,Cluster-34894.14094,Cluster-34894.15714,Cluster-34894.15712,Cluster-34894.15713,Cluster-34894.98727
GO:0001503	ossification	biological_process	0.47191	1	2	1654	45	49533	Cluster-14927.0,Cluster-34894.87268
GO:0051156	glucose 6-phosphate metabolic process	biological_process	0.47219	1	5	1654	127	49533	Cluster-34894.81829,Cluster-34894.63117,Cluster-34894.61252,Cluster-34894.61254,Cluster-34894.61730
GO:0005388	calcium-transporting ATPase activity	molecular_function	0.47304	1	1	1654	17	49533	Cluster-34894.7011
GO:0016528	sarcoplasm	cellular_component	0.47304	1	1	1654	17	49533	Cluster-34894.7011
GO:0016529	sarcoplasmic reticulum	cellular_component	0.47304	1	1	1654	17	49533	Cluster-34894.7011
GO:0015988	energy coupled proton transmembrane transport, against electrochemical gradient	biological_process	0.47382	1	12	1654	329	49533	Cluster-34894.46259,Cluster-34894.18055,Cluster-34894.15898,Cluster-34894.40744,Cluster-34894.76583,Cluster-34894.97722,Cluster-34894.78905,Cluster-34894.79588,Cluster-34894.100528,Cluster-34894.47234,Cluster-34894.90034,Cluster-34894.72073
GO:0015991	ATP hydrolysis coupled proton transport	biological_process	0.47382	1	12	1654	329	49533	Cluster-34894.40744,Cluster-34894.76583,Cluster-34894.46259,Cluster-34894.18055,Cluster-34894.15898,Cluster-34894.47234,Cluster-34894.90034,Cluster-34894.72073,Cluster-34894.97722,Cluster-34894.78905,Cluster-34894.79588,Cluster-34894.100528
GO:0019682	glyceraldehyde-3-phosphate metabolic process	biological_process	0.47434	1	5	1654	127	49533	Cluster-34894.61252,Cluster-34894.63117,Cluster-34894.81829,Cluster-34894.61730,Cluster-34894.61254
GO:0009186	deoxyribonucleoside diphosphate metabolic process	biological_process	0.4748	1	1	1654	16	49533	Cluster-34894.38003
GO:0000045	autophagosome assembly	biological_process	0.47542	1	1	1654	17	49533	Cluster-34894.41486
GO:0016236	macroautophagy	biological_process	0.47542	1	1	1654	17	49533	Cluster-34894.41486
GO:0031090	organelle membrane	cellular_component	0.47698	1	62	1654	1829	49533	Cluster-34894.33082,Cluster-34894.8401,Cluster-34894.49352,Cluster-34894.26768,Cluster-34894.31028,Cluster-34894.58468,Cluster-34894.102323,Cluster-34894.64310,Cluster-34894.42266,Cluster-34894.95221,Cluster-34894.16252,Cluster-34894.33968,Cluster-34894.95778,Cluster-34894.15898,Cluster-34894.57202,Cluster-34894.94029,Cluster-34894.34704,Cluster-34894.69959,Cluster-34894.15621,Cluster-34894.85012…
GO:0003840	gamma-glutamyltransferase activity	molecular_function	0.47707	1	1	1654	17	49533	Cluster-34894.58719
GO:0006692	prostanoid metabolic process	biological_process	0.47707	1	1	1654	17	49533	Cluster-34894.58719
GO:0006693	prostaglandin metabolic process	biological_process	0.47707	1	1	1654	17	49533	Cluster-34894.58719
GO:0032501	multicellular organismal process	biological_process	0.47812	1	60	1654	1701	49533	Cluster-34894.25747,Cluster-34894.68037,Cluster-34894.62000,Cluster-34894.24264,Cluster-34894.17019,Cluster-34894.29377,Cluster-34894.56941,Cluster-34894.11897,Cluster-34894.17915,Cluster-34894.24432,Cluster-34894.15713,Cluster-34894.27066,Cluster-34894.33039,Cluster-34894.50527,Cluster-34894.59925,Cluster-34894.99031,Cluster-34894.26268,Cluster-34894.101009,Cluster-34894.22821,Cluster-34894.9694…
GO:0016641	oxidoreductase activity, acting on the CH-NH2 group of donors, oxygen as acceptor	molecular_function	0.47918	1	2	1654	44	49533	Cluster-36750.0,Cluster-34894.99559
GO:0004484	mRNA guanylyltransferase activity	molecular_function	0.47952	1	1	1654	18	49533	Cluster-34894.15239
GO:0006027	glycosaminoglycan catabolic process	biological_process	0.47955	1	2	1654	48	49533	Cluster-34894.14094,Cluster-34894.18400
GO:0031109	microtubule polymerization or depolymerization	biological_process	0.47969	1	4	1654	102	49533	Cluster-34894.19751,Cluster-34894.12466,Cluster-34894.96049,Cluster-34894.16182
GO:0031110	regulation of microtubule polymerization or depolymerization	biological_process	0.47969	1	4	1654	102	49533	Cluster-34894.16182,Cluster-34894.96049,Cluster-34894.12466,Cluster-34894.19751
GO:0009064	glutamine family amino acid metabolic process	biological_process	0.48086	1	13	1654	372	49533	Cluster-34894.51934,Cluster-34894.98975,Cluster-34894.47056,Cluster-34894.31774,Cluster-34894.38742,Cluster-34894.59484,Cluster-34894.59866,Cluster-34894.35111,Cluster-34894.11016,Cluster-34894.37600,Cluster-34894.43602,Cluster-34894.110192,Cluster-34894.66806
GO:2000112	regulation of cellular macromolecule biosynthetic process	biological_process	0.48132	1	159	1654	4556	49533	Cluster-34894.51510,Cluster-34894.89700,Cluster-34894.31620,Cluster-34894.21275,Cluster-34894.79362,Cluster-34894.96657,Cluster-34894.71060,Cluster-34894.60304,Cluster-34894.56369,Cluster-34894.53349,Cluster-34894.18092,Cluster-34894.27484,Cluster-34894.66808,Cluster-34894.45995,Cluster-34894.7650,Cluster-34894.47768,Cluster-34894.102233,Cluster-26774.0,Cluster-34894.6976,Cluster-34894.101808,Clu…
GO:0050909	sensory perception of taste	biological_process	0.48171	1	2	1654	46	49533	Cluster-34894.9940,Cluster-34894.55304
GO:0016458	gene silencing	biological_process	0.48277	1	1	1654	20	49533	Cluster-34894.78867
GO:0006220	pyrimidine nucleotide metabolic process	biological_process	0.48893	1	3	1654	73	49533	Cluster-34894.17808,Cluster-34894.56367,Cluster-34894.102709
GO:0043015	gamma-tubulin binding	molecular_function	0.48906	1	1	1654	19	49533	Cluster-26495.0
GO:0004673	protein histidine kinase activity	molecular_function	0.48913	1	4	1654	105	49533	Cluster-34894.97108,Cluster-34894.48260,Cluster-34894.79917,Cluster-34345.0
GO:0009365	protein histidine kinase complex	cellular_component	0.48913	1	4	1654	105	49533	Cluster-34894.48260,Cluster-34894.97108,Cluster-34345.0,Cluster-34894.79917
GO:0016775	phosphotransferase activity, nitrogenous group as acceptor	molecular_function	0.48913	1	4	1654	105	49533	Cluster-34894.97108,Cluster-34894.48260,Cluster-34345.0,Cluster-34894.79917
GO:0004222	metalloendopeptidase activity	molecular_function	0.48918	1	15	1654	415	49533	Cluster-33505.0,Cluster-34894.69856,Cluster-34894.7444,Cluster-33476.2,Cluster-34894.71321,Cluster-34894.24884,Cluster-34894.73562,Cluster-34894.95237,Cluster-34894.103973,Cluster-34894.101808,Cluster-34894.52154,Cluster-34894.24883,Cluster-34894.8460,Cluster-34894.12093,Cluster-34894.93780
GO:0006383	transcription from RNA polymerase III promoter	biological_process	0.4893	1	3	1654	75	49533	Cluster-34894.60277,Cluster-34894.83425,Cluster-34894.97905
GO:0016491	oxidoreductase activity	molecular_function	0.49063	1	106	1654	3021	49533	Cluster-34894.50009,Cluster-34894.96635,Cluster-34894.62363,Cluster-34894.16375,Cluster-34894.59881,Cluster-34894.92197,Cluster-34894.38023,Cluster-34894.81829,Cluster-34894.65517,Cluster-34894.82747,Cluster-34894.66259,Cluster-34894.78962,Cluster-34894.85261,Cluster-34894.41361,Cluster-34894.10279,Cluster-25267.0,Cluster-34894.86735,Cluster-16758.1,Cluster-34894.83440,Cluster-34894.16629,Cluster…
GO:0006081	cellular aldehyde metabolic process	biological_process	0.49124	1	7	1654	184	49533	Cluster-16758.1,Cluster-34894.63117,Cluster-34894.61252,Cluster-34894.81829,Cluster-34894.61730,Cluster-34894.71967,Cluster-34894.61254
GO:0003880	protein C-terminal carboxyl O-methyltransferase activity	molecular_function	0.49255	1	1	1654	17	49533	Cluster-34894.61974
GO:0004671	protein C-terminal S-isoprenylcysteine carboxyl O-methyltransferase activity	molecular_function	0.49255	1	1	1654	17	49533	Cluster-34894.61974
GO:0006481	C-terminal protein methylation	biological_process	0.49255	1	1	1654	17	49533	Cluster-34894.61974
GO:0018410	C-terminal protein amino acid modification	biological_process	0.49255	1	1	1654	17	49533	Cluster-34894.61974
GO:0043687	post-translational protein modification	biological_process	0.49255	1	1	1654	17	49533	Cluster-34894.61974
GO:0032504	multicellular organism reproduction	biological_process	0.49405	1	6	1654	169	49533	Cluster-34894.87626,Cluster-34894.51934,Cluster-34894.82431,Cluster-34894.25747,Cluster-34894.70309,Cluster-34894.96944
GO:0051090	regulation of sequence-specific DNA binding transcription factor activity	biological_process	0.49473	1	1	1654	17	49533	Cluster-34894.78657
GO:0005024	transforming growth factor beta-activated receptor activity	molecular_function	0.49534	1	1	1654	19	49533	Cluster-34894.81805
GO:0005026	transforming growth factor beta receptor activity, type II	molecular_function	0.49534	1	1	1654	19	49533	Cluster-34894.81805
GO:0010556	regulation of macromolecule biosynthetic process	biological_process	0.49643	1	159	1654	4570	49533	Cluster-34894.6976,Cluster-34894.101808,Cluster-34894.31740,Cluster-34894.35421,Cluster-34894.47768,Cluster-34894.102233,Cluster-26774.0,Cluster-34894.51497,Cluster-34894.24926,Cluster-34894.99968,Cluster-8832.1,Cluster-34894.37824,Cluster-34894.55720,Cluster-34894.36935,Cluster-34894.13664,Cluster-34894.44517,Cluster-34894.104224,Cluster-34894.67113,Cluster-34894.17604,Cluster-34894.65312,Cluste…
GO:0031326	regulation of cellular biosynthetic process	biological_process	0.49643	1	159	1654	4570	49533	Cluster-34894.27484,Cluster-34894.45995,Cluster-34894.7650,Cluster-34894.66808,Cluster-34894.53349,Cluster-34894.18092,Cluster-34894.21275,Cluster-34894.79362,Cluster-34894.96657,Cluster-34894.71060,Cluster-34894.60304,Cluster-34894.56369,Cluster-34894.51510,Cluster-34894.89700,Cluster-34894.31620,Cluster-34894.67113,Cluster-34894.17604,Cluster-34894.65312,Cluster-34894.48260,Cluster-19252.0,Clus…
GO:0004345	glucose-6-phosphate dehydrogenase activity	molecular_function	0.49888	1	1	1654	20	49533	Cluster-34894.81829
GO:0019953	sexual reproduction	biological_process	0.49896	1	9	1654	259	49533	Cluster-34894.70309,Cluster-34894.96944,Cluster-34894.69077,Cluster-34894.87626,Cluster-34894.52779,Cluster-34894.35116,Cluster-34894.82431,Cluster-34894.25747,Cluster-34894.51934
GO:0004826	phenylalanine-tRNA ligase activity	molecular_function	0.49898	1	1	1654	20	49533	Cluster-34894.14416
GO:0009328	phenylalanine-tRNA ligase complex	cellular_component	0.49898	1	1	1654	20	49533	Cluster-34894.14416
GO:0005544	calcium-dependent phospholipid binding	molecular_function	0.49922	1	2	1654	49	49533	Cluster-34894.37790,Cluster-34894.99676
GO:1901292	nucleoside phosphate catabolic process	biological_process	0.49965	1	1	1654	18	49533	Cluster-34894.46408
GO:0004611	phosphoenolpyruvate carboxykinase activity	molecular_function	0.50115	1	1	1654	21	49533	Cluster-34894.41391
GO:0007005	mitochondrion organization	biological_process	0.50163	1	10	1654	293	49533	Cluster-34894.95221,Cluster-34894.22821,Cluster-34894.57196,Cluster-34894.69959,Cluster-34894.29411,Cluster-34894.29410,Cluster-34894.83060,Cluster-34894.99970,Cluster-34894.77939,Cluster-34894.15621
GO:0004140	dephospho-CoA kinase activity	molecular_function	0.50224	1	1	1654	20	49533	Cluster-34894.36035
GO:0044702	single organism reproductive process	biological_process	0.50311	1	8	1654	225	49533	Cluster-34894.51934,Cluster-34894.35116,Cluster-34894.82431,Cluster-34894.25747,Cluster-34894.87626,Cluster-34894.69077,Cluster-34894.70309,Cluster-34894.96944
GO:0005088	Ras guanyl-nucleotide exchange factor activity	molecular_function	0.5033	1	8	1654	208	49533	Cluster-34894.73279,Cluster-34894.89541,Cluster-13907.0,Cluster-34894.93280,Cluster-34894.9314,Cluster-34894.5263,Cluster-34894.88440,Cluster-34894.97991
GO:0005089	Rho guanyl-nucleotide exchange factor activity	molecular_function	0.5033	1	8	1654	208	49533	Cluster-34894.9314,Cluster-34894.97991,Cluster-34894.88440,Cluster-34894.5263,Cluster-13907.0,Cluster-34894.93280,Cluster-34894.89541,Cluster-34894.73279
GO:0005786	signal recognition particle, endoplasmic reticulum targeting	cellular_component	0.50347	1	2	1654	47	49533	Cluster-34894.64310,Cluster-34894.102323
GO:0016866	intramolecular transferase activity	molecular_function	0.50365	1	3	1654	75	49533	Cluster-34894.92828,Cluster-34894.81805,Cluster-34894.83089
GO:0016763	transferase activity, transferring pentosyl groups	molecular_function	0.5037	1	7	1654	188	49533	Cluster-34894.1649,Cluster-34894.6548,Cluster-34894.84230,Cluster-34894.15556,Cluster-35241.0,Cluster-34894.48723,Cluster-34894.53997
GO:0009889	regulation of biosynthetic process	biological_process	0.50372	1	159	1654	4576	49533	Cluster-34894.24883,Cluster-34894.76815,Cluster-34894.25450,Cluster-34894.38003,Cluster-34894.51890,Cluster-34894.60505,Cluster-34894.7298,Cluster-34894.58131,Cluster-34894.15653,Cluster-34894.12685,Cluster-34894.68367,Cluster-34894.71134,Cluster-34894.38305,Cluster-34894.46151,Cluster-34894.17406,Cluster-34894.52963,Cluster-34894.52725,Cluster-34894.16182,Cluster-34894.25247,Cluster-34894.66305,…
GO:0032780	negative regulation of ATPase activity	biological_process	0.50377	1	1	1654	23	49533	Cluster-34894.51255
GO:0030031	cell projection assembly	biological_process	0.50511	1	4	1654	105	49533	Cluster-34894.10810,Cluster-34894.29868,Cluster-34894.87268,Cluster-34894.33109
GO:0015095	magnesium ion transmembrane transporter activity	molecular_function	0.50658	1	1	1654	22	49533	Cluster-34894.101377
GO:0015693	magnesium ion transport	biological_process	0.50658	1	1	1654	22	49533	Cluster-34894.101377
GO:0005245	voltage-gated calcium channel activity	molecular_function	0.50698	1	1	1654	21	49533	Cluster-34894.58030
GO:0001522	pseudouridine synthesis	biological_process	0.50902	1	2	1654	47	49533	Cluster-34894.83089,Cluster-34894.81805
GO:0046983	protein dimerization activity	molecular_function	0.50903	1	28	1654	804	49533	Cluster-32127.1,Cluster-34894.38619,Cluster-34894.13548,Cluster-34894.97614,Cluster-34894.62520,Cluster-34894.97722,Cluster-34894.55720,Cluster-34894.104730,Cluster-35241.0,Cluster-34894.58707,Cluster-34894.33109,Cluster-34894.22823,Cluster-34894.19751,Cluster-34894.26612,Cluster-34894.48218,Cluster-34894.51510,Cluster-34894.99500,Cluster-34894.91000,Cluster-34894.16474,Cluster-34894.21275,Cluste…
GO:0032505	reproduction of a single-celled organism	biological_process	0.50953	1	10	1654	280	49533	Cluster-34894.16182,Cluster-34894.15712,Cluster-34894.79588,Cluster-34894.80873,Cluster-34894.59925,Cluster-19252.0,Cluster-34894.15710,Cluster-34894.10023,Cluster-34894.48898,Cluster-34894.45995
GO:0048609	multicellular organismal reproductive process	biological_process	0.50954	1	5	1654	139	49533	Cluster-34894.25747,Cluster-34894.70309,Cluster-34894.96944,Cluster-34894.51934,Cluster-34894.87626
GO:0044707	single-multicellular organism process	biological_process	0.51091	1	54	1654	1537	49533	Cluster-34894.71244,Cluster-34894.47755,Cluster-34894.21275,Cluster-34894.60314,Cluster-34894.8481,Cluster-34894.78551,Cluster-34894.22770,Cluster-34894.64754,Cluster-34894.97028,Cluster-34894.82713,Cluster-34894.59783,Cluster-34894.61954,Cluster-37016.0,Cluster-34894.53590,Cluster-34894.87268,Cluster-7665.0,Cluster-34894.45995,Cluster-14927.0,Cluster-34894.38829,Cluster-34894.19751,Cluster-34894…
GO:0005876	spindle microtubule	cellular_component	0.51097	1	3	1654	83	49533	Cluster-34894.19751,Cluster-34894.96049,Cluster-34894.16182
GO:0033646	host intracellular part	cellular_component	0.51132	1	10	1654	285	49533	Cluster-34894.46098,Cluster-34894.66808,Cluster-34894.75421,Cluster-34894.26268,Cluster-34894.61988,Cluster-34894.42568,Cluster-34894.53033,Cluster-34894.25247,Cluster-34894.78867,Cluster-34894.98268
GO:0043656	intracellular region of host	cellular_component	0.51132	1	10	1654	285	49533	Cluster-34894.66808,Cluster-34894.46098,Cluster-34894.26268,Cluster-34894.75421,Cluster-34894.78867,Cluster-34894.53033,Cluster-34894.25247,Cluster-34894.42568,Cluster-34894.61988,Cluster-34894.98268
GO:0000149	SNARE binding	molecular_function	0.51167	1	3	1654	80	49533	Cluster-34894.98727,Cluster-34894.61778,Cluster-34894.15715
GO:0019905	syntaxin binding	molecular_function	0.51167	1	3	1654	80	49533	Cluster-34894.61778,Cluster-34894.98727,Cluster-34894.15715
GO:0034660	ncRNA metabolic process	biological_process	0.51184	1	30	1654	838	49533	Cluster-34894.67786,Cluster-34894.19990,Cluster-34894.51934,Cluster-34894.63014,Cluster-34894.37859,Cluster-34894.41191,Cluster-34894.46661,Cluster-34894.58719,Cluster-34894.105672,Cluster-34894.99967,Cluster-34894.29132,Cluster-34894.54219,Cluster-34894.81176,Cluster-34894.15343,Cluster-34894.92197,Cluster-34894.61254,Cluster-34894.50833,Cluster-34894.26752,Cluster-34894.41687,Cluster-26628.0,Cl…
GO:0004714	transmembrane receptor protein tyrosine kinase activity	molecular_function	0.51184	1	2	1654	50	49533	Cluster-34894.77939,Cluster-34894.78970
GO:0005795	Golgi stack	cellular_component	0.51243	1	2	1654	49	49533	Cluster-34894.52934,Cluster-34894.49352
GO:0019013	viral nucleocapsid	cellular_component	0.51339	1	4	1654	109	49533	Cluster-34894.19407,Cluster-34894.13549,Cluster-34894.17880,Cluster-34894.64976
GO:0004814	arginine-tRNA ligase activity	molecular_function	0.51357	1	1	1654	19	49533	Cluster-34894.51934
GO:0006420	arginyl-tRNA aminoacylation	biological_process	0.51357	1	1	1654	19	49533	Cluster-34894.51934
GO:0015630	microtubule cytoskeleton	cellular_component	0.51493	1	29	1654	854	49533	Cluster-34894.79586,Cluster-34894.64041,Cluster-34894.51934,Cluster-34894.68407,Cluster-34894.97722,Cluster-34894.16182,Cluster-34894.13548,Cluster-34894.19751,Cluster-34894.104730,Cluster-34894.17296,Cluster-34894.61660,Cluster-34894.78560,Cluster-34894.105470,Cluster-34894.78905,Cluster-34894.79588,Cluster-34894.15713,Cluster-34894.14312,Cluster-34894.53632,Cluster-34894.78553,Cluster-34894.216…
GO:0046496	nicotinamide nucleotide metabolic process	biological_process	0.51518	1	7	1654	190	49533	Cluster-34894.81829,Cluster-34894.61252,Cluster-34894.63117,Cluster-34894.61254,Cluster-12597.1,Cluster-34894.86397,Cluster-34894.61730
GO:0030260	entry into host cell	biological_process	0.51532	1	3	1654	80	49533	Cluster-34894.58707,Cluster-34894.98268,Cluster-34894.61988
GO:0044409	entry into host	biological_process	0.51532	1	3	1654	80	49533	Cluster-34894.58707,Cluster-34894.98268,Cluster-34894.61988
GO:0046718	viral entry into host cell	biological_process	0.51532	1	3	1654	80	49533	Cluster-34894.61988,Cluster-34894.58707,Cluster-34894.98268
GO:0051806	entry into cell of other organism involved in symbiotic interaction	biological_process	0.51532	1	3	1654	80	49533	Cluster-34894.58707,Cluster-34894.98268,Cluster-34894.61988
GO:0051828	entry into other organism involved in symbiotic interaction	biological_process	0.51532	1	3	1654	80	49533	Cluster-34894.61988,Cluster-34894.58707,Cluster-34894.98268
GO:0005778	peroxisomal membrane	cellular_component	0.51577	1	2	1654	49	49533	Cluster-34894.57008,Cluster-34894.93780
GO:0031903	microbody membrane	cellular_component	0.51577	1	2	1654	49	49533	Cluster-34894.93780,Cluster-34894.57008
GO:0044438	microbody part	cellular_component	0.51577	1	2	1654	49	49533	Cluster-34894.93780,Cluster-34894.57008
GO:0044439	peroxisomal part	cellular_component	0.51577	1	2	1654	49	49533	Cluster-34894.57008,Cluster-34894.93780
GO:0015099	nickel cation transmembrane transporter activity	molecular_function	0.51601	1	1	1654	21	49533	Cluster-34894.73678
GO:0015675	nickel cation transport	biological_process	0.51601	1	1	1654	21	49533	Cluster-34894.73678
GO:0035444	nickel cation transmembrane transport	biological_process	0.51601	1	1	1654	21	49533	Cluster-34894.73678
GO:0030212	hyaluronan metabolic process	biological_process	0.51679	1	1	1654	20	49533	Cluster-34894.18176
GO:0033647	host intracellular organelle	cellular_component	0.51737	1	9	1654	258	49533	Cluster-34894.98268,Cluster-34894.42568,Cluster-34894.61988,Cluster-34894.53033,Cluster-34894.25247,Cluster-34894.75421,Cluster-34894.26268,Cluster-34894.46098,Cluster-34894.66808
GO:0033648	host intracellular membrane-bounded organelle	cellular_component	0.51737	1	9	1654	258	49533	Cluster-34894.42568,Cluster-34894.61988,Cluster-34894.53033,Cluster-34894.25247,Cluster-34894.98268,Cluster-34894.46098,Cluster-34894.66808,Cluster-34894.75421,Cluster-34894.26268
GO:0050840	extracellular matrix binding	molecular_function	0.51741	1	1	1654	22	49533	Cluster-34894.7442
GO:0004602	glutathione peroxidase activity	molecular_function	0.51948	1	1	1654	21	49533	Cluster-34894.75349
GO:0008519	ammonium transmembrane transporter activity	molecular_function	0.52008	1	1	1654	20	49533	Cluster-34894.22343
GO:0009060	aerobic respiration	biological_process	0.52042	1	3	1654	80	49533	Cluster-34894.29908,Cluster-34894.41391,Cluster-34894.59881
GO:0019842	vitamin binding	molecular_function	0.52099	1	3	1654	74	49533	Cluster-34894.72801,Cluster-34894.76990,Cluster-34894.19108
GO:0034754	cellular hormone metabolic process	biological_process	0.52155	1	2	1654	43	49533	Cluster-34894.61733,Cluster-34894.61730
GO:0044703	multi-organism reproductive process	biological_process	0.52197	1	9	1654	264	49533	Cluster-34894.51934,Cluster-34894.35116,Cluster-34894.82431,Cluster-34894.25747,Cluster-34894.87626,Cluster-34894.52779,Cluster-34894.69077,Cluster-34894.70309,Cluster-34894.96944
GO:0012507	ER to Golgi transport vesicle membrane	cellular_component	0.52224	1	8	1654	267	49533	Cluster-34894.47996,Cluster-34894.79362,Cluster-34894.79358,Cluster-34894.33419,Cluster-34894.26768,Cluster-34894.33082,Cluster-34894.81805,Cluster-34894.68037
GO:0030127	COPII vesicle coat	cellular_component	0.52224	1	8	1654	267	49533	Cluster-34894.79358,Cluster-34894.79362,Cluster-34894.47996,Cluster-34894.68037,Cluster-34894.33082,Cluster-34894.81805,Cluster-34894.26768,Cluster-34894.33419
GO:0030134	ER to Golgi transport vesicle	cellular_component	0.52224	1	8	1654	267	49533	Cluster-34894.33082,Cluster-34894.81805,Cluster-34894.26768,Cluster-34894.33419,Cluster-34894.68037,Cluster-34894.47996,Cluster-34894.79358,Cluster-34894.79362
GO:0000917	barrier septum assembly	biological_process	0.52279	1	10	1654	284	49533	Cluster-34894.10023,Cluster-34894.45995,Cluster-34894.48898,Cluster-34894.15710,Cluster-19252.0,Cluster-34894.59925,Cluster-34894.80873,Cluster-34894.79588,Cluster-34894.15712,Cluster-34894.16182
GO:0032506	cytokinetic process	biological_process	0.52279	1	10	1654	284	49533	Cluster-34894.15710,Cluster-34894.45995,Cluster-34894.10023,Cluster-34894.48898,Cluster-34894.59925,Cluster-19252.0,Cluster-34894.15712,Cluster-34894.79588,Cluster-34894.80873,Cluster-34894.16182
GO:0090529	cell septum assembly	biological_process	0.52279	1	10	1654	284	49533	Cluster-34894.15710,Cluster-34894.45995,Cluster-34894.10023,Cluster-34894.48898,Cluster-34894.59925,Cluster-19252.0,Cluster-34894.15712,Cluster-34894.79588,Cluster-34894.80873,Cluster-34894.16182
GO:1902410	mitotic cytokinetic process	biological_process	0.52279	1	10	1654	284	49533	Cluster-34894.80873,Cluster-34894.79588,Cluster-34894.15712,Cluster-34894.16182,Cluster-34894.10023,Cluster-34894.45995,Cluster-34894.48898,Cluster-34894.15710,Cluster-19252.0,Cluster-34894.59925
GO:0030288	outer membrane-bounded periplasmic space	cellular_component	0.52366	1	1	1654	21	49533	Cluster-34894.46661
GO:0008535	respiratory chain complex IV assembly	biological_process	0.52369	1	1	1654	23	49533	Cluster-34894.57196
GO:0033617	mitochondrial respiratory chain complex IV assembly	biological_process	0.52369	1	1	1654	23	49533	Cluster-34894.57196
GO:0030435	sporulation resulting in formation of a cellular spore	biological_process	0.52381	1	1	1654	22	49533	Cluster-34894.31620
GO:0000346	transcription export complex	cellular_component	0.52383	1	2	1654	48	49533	Cluster-34894.30338,Cluster-34894.45300
GO:0000445	THO complex part of transcription export complex	cellular_component	0.52383	1	2	1654	48	49533	Cluster-34894.30338,Cluster-34894.45300
GO:0005929	cilium	cellular_component	0.52496	1	10	1654	295	49533	Cluster-34894.15712,Cluster-34894.98727,Cluster-34894.15713,Cluster-34894.96049,Cluster-34894.14094,Cluster-34894.15714,Cluster-34894.49717,Cluster-34894.45300,Cluster-34894.19751,Cluster-34894.46259
GO:0030865	cortical cytoskeleton organization	biological_process	0.52677	1	1	1654	22	49533	Cluster-34894.15712
GO:0030866	cortical actin cytoskeleton organization	biological_process	0.52677	1	1	1654	22	49533	Cluster-34894.15712
GO:0007050	cell cycle arrest	biological_process	0.52844	1	2	1654	45	49533	Cluster-34894.8282,Cluster-34894.65876
GO:0007020	microtubule nucleation	biological_process	0.5287	1	1	1654	19	49533	Cluster-34894.12466
GO:0010968	regulation of microtubule nucleation	biological_process	0.5287	1	1	1654	19	49533	Cluster-34894.12466
GO:0031112	positive regulation of microtubule polymerization or depolymerization	biological_process	0.5287	1	1	1654	19	49533	Cluster-34894.12466
GO:0031113	regulation of microtubule polymerization	biological_process	0.5287	1	1	1654	19	49533	Cluster-34894.12466
GO:0031116	positive regulation of microtubule polymerization	biological_process	0.5287	1	1	1654	19	49533	Cluster-34894.12466
GO:0046785	microtubule polymerization	biological_process	0.5287	1	1	1654	19	49533	Cluster-34894.12466
GO:0090063	positive regulation of microtubule nucleation	biological_process	0.5287	1	1	1654	19	49533	Cluster-34894.12466
GO:0051494	negative regulation of cytoskeleton organization	biological_process	0.52971	1	2	1654	51	49533	Cluster-34894.43248,Cluster-34894.77674
GO:0004127	cytidylate kinase activity	molecular_function	0.53006	1	1	1654	19	49533	Cluster-34894.36035
GO:0019954	asexual reproduction	biological_process	0.53023	1	11	1654	313	49533	Cluster-19252.0,Cluster-34894.59925,Cluster-34894.15710,Cluster-34894.48898,Cluster-34894.10023,Cluster-34894.45995,Cluster-34894.16182,Cluster-24797.8,Cluster-34894.15712,Cluster-34894.80873,Cluster-34894.79588
GO:0006206	pyrimidine nucleobase metabolic process	biological_process	0.53215	1	18	1654	554	49533	Cluster-34894.22821,Cluster-34894.50527,Cluster-34894.15292,Cluster-34894.38003,Cluster-34894.36035,Cluster-34894.75218,Cluster-34894.17808,Cluster-34894.63010,Cluster-34894.60277,Cluster-34894.90167,Cluster-34894.88457,Cluster-34894.22823,Cluster-34894.62093,Cluster-34894.35796,Cluster-34894.36187,Cluster-34894.57438,Cluster-34894.83425,Cluster-34894.60924
GO:0042287	MHC protein binding	molecular_function	0.53223	1	1	1654	22	49533	Cluster-34894.81721
GO:0042289	MHC class II protein binding	molecular_function	0.53223	1	1	1654	22	49533	Cluster-34894.81721
GO:0071804	cellular potassium ion transport	biological_process	0.53245	1	1	1654	22	49533	Cluster-34894.33039
GO:0071805	potassium ion transmembrane transport	biological_process	0.53245	1	1	1654	22	49533	Cluster-34894.33039
GO:0007224	smoothened signaling pathway	biological_process	0.53348	1	2	1654	50	49533	Cluster-34894.19109,Cluster-34894.9344
GO:0004511	tyrosine 3-monooxygenase activity	molecular_function	0.5351	1	1	1654	21	49533	Cluster-34894.81972
GO:0016568	chromatin modification	biological_process	0.53564	1	6	1654	169	49533	Cluster-34894.7647,Cluster-34894.101808,Cluster-34894.72119,Cluster-34894.63399,Cluster-34894.48561,Cluster-34894.7650
GO:0022406	membrane docking	biological_process	0.53601	1	4	1654	109	49533	Cluster-33544.0,Cluster-34894.41362,Cluster-34894.96049,Cluster-34894.41361
GO:0004478	methionine adenosyltransferase activity	molecular_function	0.53629	1	1	1654	20	49533	Cluster-34894.29157
GO:0006556	S-adenosylmethionine biosynthetic process	biological_process	0.53629	1	1	1654	20	49533	Cluster-34894.29157
GO:0005869	dynactin complex	cellular_component	0.53703	1	1	1654	23	49533	Cluster-34894.53632
GO:0006355	regulation of transcription, DNA-templated	biological_process	0.53867	1	147	1654	4257	49533	Cluster-34894.51510,Cluster-34894.89700,Cluster-34894.31620,Cluster-34894.21275,Cluster-34894.79362,Cluster-34894.96657,Cluster-34894.71060,Cluster-34894.60304,Cluster-34894.56369,Cluster-34894.27484,Cluster-34894.45995,Cluster-34894.66808,Cluster-34894.7650,Cluster-34894.102233,Cluster-34894.47768,Cluster-26774.0,Cluster-34894.6976,Cluster-34894.101808,Cluster-34894.31740,Cluster-34894.35421,Clu…
GO:1903506	regulation of nucleic acid-templated transcription	biological_process	0.53867	1	147	1654	4257	49533	Cluster-34894.10203,Cluster-34894.84142,Cluster-34894.49731,Cluster-34894.7647,Cluster-34894.95221,Cluster-34894.44917,Cluster-34894.40392,Cluster-34894.75040,Cluster-34894.74967,Cluster-34894.99067,Cluster-34894.30407,Cluster-34894.82436,Cluster-34894.54418,Cluster-34894.45425,Cluster-34894.78750,Cluster-34894.59587,Cluster-20810.0,Cluster-34894.37405,Cluster-34894.46098,Cluster-34894.63399,Clus…
GO:0004499	N,N-dimethylaniline monooxygenase activity	molecular_function	0.5388	1	1	1654	21	49533	Cluster-34894.65259
GO:0031175	neuron projection development	biological_process	0.53952	1	6	1654	159	49533	Cluster-34894.62381,Cluster-37016.0,Cluster-34894.35044,Cluster-34894.64754,Cluster-34894.63685,Cluster-34894.62000
GO:0048666	neuron development	biological_process	0.53952	1	6	1654	159	49533	Cluster-34894.35044,Cluster-37016.0,Cluster-34894.62381,Cluster-34894.64754,Cluster-34894.63685,Cluster-34894.62000
GO:1901564	organonitrogen compound metabolic process	biological_process	0.54033	1	227	1654	6680	49533	Cluster-34894.61859,Cluster-34894.77692,Cluster-34894.102233,Cluster-34894.59484,Cluster-4270.2,Cluster-34894.11016,Cluster-34894.81805,Cluster-34894.96635,Cluster-34894.16987,Cluster-34894.98975,Cluster-34894.49674,Cluster-34894.92197,Cluster-34894.44517,Cluster-34894.104224,Cluster-34894.82207,Cluster-34894.15804,Cluster-34894.1649,Cluster-34894.104963,Cluster-34894.61252,Cluster-34894.27832,Cl…
GO:0002532	production of molecular mediator involved in inflammatory response	biological_process	0.54091	1	1	1654	23	49533	Cluster-34894.71490
GO:0004896	cytokine receptor activity	molecular_function	0.54091	1	1	1654	23	49533	Cluster-34894.71490
GO:0003917	DNA topoisomerase type I activity	molecular_function	0.54103	1	1	1654	26	49533	Cluster-34894.67287
GO:0006032	chitin catabolic process	biological_process	0.54132	1	1	1654	22	49533	Cluster-34894.29731
GO:0046348	amino sugar catabolic process	biological_process	0.54132	1	1	1654	22	49533	Cluster-34894.29731
GO:1901072	glucosamine-containing compound catabolic process	biological_process	0.54132	1	1	1654	22	49533	Cluster-34894.29731
GO:0030030	cell projection organization	biological_process	0.54139	1	10	1654	276	49533	Cluster-34894.63685,Cluster-34894.87268,Cluster-34894.29868,Cluster-37016.0,Cluster-34894.33109,Cluster-34894.62000,Cluster-34894.10810,Cluster-34894.64754,Cluster-34894.35044,Cluster-34894.62381
GO:0009620	response to fungus	biological_process	0.54153	1	1	1654	25	49533	Cluster-34894.20041
GO:0050832	defense response to fungus	biological_process	0.54153	1	1	1654	25	49533	Cluster-34894.20041
GO:0044391	ribosomal subunit	cellular_component	0.54185	1	2	1654	52	49533	Cluster-34894.37401,Cluster-34894.18076
GO:0032990	cell part morphogenesis	biological_process	0.54256	1	6	1654	165	49533	Cluster-34894.35044,Cluster-37016.0,Cluster-34894.33109,Cluster-34894.62381,Cluster-34894.64754,Cluster-34894.62000
GO:0048858	cell projection morphogenesis	biological_process	0.54256	1	6	1654	165	49533	Cluster-37016.0,Cluster-34894.62381,Cluster-34894.33109,Cluster-34894.35044,Cluster-34894.64754,Cluster-34894.62000
GO:0016860	intramolecular oxidoreductase activity	molecular_function	0.54267	1	3	1654	79	49533	Cluster-34894.67287,Cluster-12597.1,Cluster-34894.97051
GO:0006013	mannose metabolic process	biological_process	0.54271	1	5	1654	140	49533	Cluster-34894.15240,Cluster-34894.52311,Cluster-34894.67287,Cluster-34894.97051,Cluster-12597.1
GO:0044461	bacterial-type flagellum part	cellular_component	0.54294	1	2	1654	54	49533	Cluster-34894.78240,Cluster-34894.46289
GO:0043021	ribonucleoprotein complex binding	molecular_function	0.5442	1	2	1654	51	49533	Cluster-34894.64310,Cluster-34894.102323
GO:0034062	RNA polymerase activity	molecular_function	0.54455	1	23	1654	695	49533	Cluster-34894.44517,Cluster-34894.62093,Cluster-34894.22823,Cluster-34894.40392,Cluster-34894.35796,Cluster-34894.64310,Cluster-34894.88457,Cluster-34894.60924,Cluster-34894.83425,Cluster-34894.63014,Cluster-34894.57438,Cluster-34894.36187,Cluster-34894.15292,Cluster-34894.38003,Cluster-34894.22821,Cluster-34894.31267,Cluster-34894.50527,Cluster-34894.60277,Cluster-34894.63010,Cluster-34894.77692…
GO:0006414	translational elongation	biological_process	0.54567	1	2	1654	51	49533	Cluster-30483.0,Cluster-34894.44517
GO:0006448	regulation of translational elongation	biological_process	0.54567	1	2	1654	51	49533	Cluster-34894.44517,Cluster-30483.0
GO:0044448	cell cortex part	cellular_component	0.54618	1	10	1654	286	49533	Cluster-34894.16182,Cluster-34894.96049,Cluster-34894.63685,Cluster-34894.41361,Cluster-34894.56107,Cluster-34894.12066,Cluster-34894.41362,Cluster-33544.0,Cluster-34894.66808,Cluster-34894.60314
GO:0008376	acetylgalactosaminyltransferase activity	molecular_function	0.54648	1	1	1654	22	49533	Cluster-34894.49352
GO:0032580	Golgi cisterna membrane	cellular_component	0.54648	1	1	1654	22	49533	Cluster-34894.49352
GO:0008175	tRNA methyltransferase activity	molecular_function	0.54678	1	3	1654	78	49533	Cluster-34894.50833,Cluster-34894.41602,Cluster-34894.41191
GO:0006739	NADP metabolic process	biological_process	0.54696	1	5	1654	138	49533	Cluster-34894.63117,Cluster-34894.61252,Cluster-34894.81829,Cluster-34894.61730,Cluster-34894.61254
GO:0016407	acetyltransferase activity	molecular_function	0.54774	1	6	1654	166	49533	Cluster-34894.41391,Cluster-34894.80873,Cluster-34894.17719,Cluster-34894.54152,Cluster-34894.101808,Cluster-34894.6976
GO:0000314	organellar small ribosomal subunit	cellular_component	0.54795	1	1	1654	22	49533	Cluster-34894.37401
GO:0005763	mitochondrial small ribosomal subunit	cellular_component	0.54795	1	1	1654	22	49533	Cluster-34894.37401
GO:0015935	small ribosomal subunit	cellular_component	0.54795	1	1	1654	22	49533	Cluster-34894.37401
GO:0004190	aspartic-type endopeptidase activity	molecular_function	0.54803	1	13	1654	374	49533	Cluster-34894.81745,Cluster-34894.76815,Cluster-34894.104730,Cluster-34894.94575,Cluster-34894.45002,Cluster-34894.67113,Cluster-34894.25547,Cluster-34894.31740,Cluster-34894.20320,Cluster-34894.39312,Cluster-24797.8,Cluster-34894.86559,Cluster-34894.89243
GO:0070001	aspartic-type peptidase activity	molecular_function	0.54803	1	13	1654	374	49533	Cluster-34894.20320,Cluster-34894.39312,Cluster-34894.25547,Cluster-34894.31740,Cluster-34894.86559,Cluster-24797.8,Cluster-34894.89243,Cluster-34894.76815,Cluster-34894.104730,Cluster-34894.94575,Cluster-34894.45002,Cluster-34894.67113,Cluster-34894.81745
GO:0015297	antiporter activity	molecular_function	0.54961	1	2	1654	52	49533	Cluster-34894.61525,Cluster-34894.55671
GO:0031072	heat shock protein binding	molecular_function	0.54992	1	1	1654	20	49533	Cluster-34894.40996
GO:0005342	organic acid transmembrane transporter activity	molecular_function	0.55054	1	4	1654	105	49533	Cluster-34894.19496,Cluster-34894.15804,Cluster-34894.96289,Cluster-34894.47234
GO:0046943	carboxylic acid transmembrane transporter activity	molecular_function	0.55054	1	4	1654	105	49533	Cluster-34894.47234,Cluster-34894.15804,Cluster-34894.19496,Cluster-34894.96289
GO:0043623	cellular protein complex assembly	biological_process	0.55127	1	29	1654	861	49533	Cluster-34894.60834,Cluster-34894.7841,Cluster-34894.70713,Cluster-34894.16182,Cluster-34894.24264,Cluster-14514.0,Cluster-34894.40744,Cluster-34894.77674,Cluster-34894.19751,Cluster-34894.17019,Cluster-34894.15804,Cluster-34894.45995,Cluster-34894.38829,Cluster-34894.12066,Cluster-34894.15898,Cluster-34894.17915,Cluster-34894.72073,Cluster-34894.24432,Cluster-34894.43248,Cluster-34894.15713,Clus…
GO:0045444	fat cell differentiation	biological_process	0.55129	1	2	1654	52	49533	Cluster-34894.66017,Cluster-26495.0
GO:0045944	positive regulation of transcription from RNA polymerase II promoter	biological_process	0.5522	1	3	1654	80	49533	Cluster-34894.50596,Cluster-34894.24926,Cluster-34894.76815
GO:0010605	negative regulation of macromolecule metabolic process	biological_process	0.5524	1	10	1654	290	49533	Cluster-34894.78867,Cluster-34894.71563,Cluster-34894.13664,Cluster-34894.98656,Cluster-34894.2329,Cluster-34894.101011,Cluster-34894.6241,Cluster-34894.17604,Cluster-19183.0,Cluster-34894.81610
GO:0006399	tRNA metabolic process	biological_process	0.55247	1	24	1654	681	49533	Cluster-34894.19990,Cluster-34894.46661,Cluster-34894.37859,Cluster-34894.51934,Cluster-34894.41191,Cluster-34894.29132,Cluster-34894.54219,Cluster-34894.99967,Cluster-34894.15343,Cluster-34894.92197,Cluster-34894.81176,Cluster-34894.26752,Cluster-34894.61254,Cluster-34894.50833,Cluster-34894.15653,Cluster-34894.96990,Cluster-34894.61252,Cluster-34894.95237,Cluster-34894.92978,Cluster-26628.0,Clu…
GO:0007033	vacuole organization	biological_process	0.55334	1	1	1654	23	49533	Cluster-34894.41486
GO:0015886	heme transport	biological_process	0.55366	1	3	1654	82	49533	Cluster-34894.5266,Cluster-34894.70713,Cluster-34894.50527
GO:1901678	iron coordination entity transport	biological_process	0.55366	1	3	1654	82	49533	Cluster-34894.5266,Cluster-34894.70713,Cluster-34894.50527
GO:0007409	axonogenesis	biological_process	0.55369	1	5	1654	136	49533	Cluster-34894.62000,Cluster-34894.64754,Cluster-34894.62381,Cluster-37016.0,Cluster-34894.35044
GO:0007411	axon guidance	biological_process	0.55369	1	5	1654	136	49533	Cluster-34894.62000,Cluster-34894.62381,Cluster-37016.0,Cluster-34894.35044,Cluster-34894.64754
GO:0048667	cell morphogenesis involved in neuron differentiation	biological_process	0.55369	1	5	1654	136	49533	Cluster-34894.64754,Cluster-34894.62381,Cluster-37016.0,Cluster-34894.35044,Cluster-34894.62000
GO:0048812	neuron projection morphogenesis	biological_process	0.55369	1	5	1654	136	49533	Cluster-34894.64754,Cluster-34894.35044,Cluster-34894.62381,Cluster-37016.0,Cluster-34894.62000
GO:0061564	axon development	biological_process	0.55369	1	5	1654	136	49533	Cluster-34894.35044,Cluster-37016.0,Cluster-34894.62381,Cluster-34894.64754,Cluster-34894.62000
GO:0097485	neuron projection guidance	biological_process	0.55369	1	5	1654	136	49533	Cluster-34894.64754,Cluster-34894.35044,Cluster-34894.62381,Cluster-37016.0,Cluster-34894.62000
GO:2001141	regulation of RNA biosynthetic process	biological_process	0.55412	1	147	1654	4271	49533	Cluster-34894.35796,Cluster-34894.64310,Cluster-34894.78752,Cluster-34894.54883,Cluster-34894.45429,Cluster-34894.44965,Cluster-34894.101777,Cluster-34894.14416,Cluster-34894.97905,Cluster-34894.43248,Cluster-34894.92978,Cluster-34894.42568,Cluster-34894.54578,Cluster-34894.22823,Cluster-34894.9679,Cluster-34894.107068,Cluster-34894.7700,Cluster-34894.36683,Cluster-34894.56478,Cluster-34894.10092…
GO:0004713	protein tyrosine kinase activity	molecular_function	0.55477	1	3	1654	84	49533	Cluster-34894.77939,Cluster-34894.78970,Cluster-34894.76188
GO:0005057	receptor signaling protein activity	molecular_function	0.5548	1	4	1654	108	49533	Cluster-34894.48260,Cluster-34894.53542,Cluster-34894.79917,Cluster-34345.0
GO:0006813	potassium ion transport	biological_process	0.55518	1	9	1654	256	49533	Cluster-34894.61252,Cluster-34894.22373,Cluster-15271.0,Cluster-34894.55456,Cluster-34894.101694,Cluster-34894.61254,Cluster-34894.92197,Cluster-34894.40392,Cluster-34894.33039
GO:0007340	acrosome reaction	biological_process	0.55633	1	1	1654	27	49533	Cluster-34894.82431
GO:0017156	calcium ion-dependent exocytosis	biological_process	0.55633	1	1	1654	27	49533	Cluster-34894.82431
GO:0008616	queuosine biosynthetic process	biological_process	0.55815	1	1	1654	21	49533	Cluster-34894.22318
GO:0046116	queuosine metabolic process	biological_process	0.55815	1	1	1654	21	49533	Cluster-34894.22318
GO:0032991	macromolecular complex	cellular_component	0.55955	1	332	1654	9778	49533	Cluster-34894.33977,Cluster-34894.35796,Cluster-34894.47234,Cluster-34894.44965,Cluster-34894.17294,Cluster-34894.45429,Cluster-34894.31170,Cluster-34894.105672,Cluster-34894.70803,Cluster-34894.72213,Cluster-34894.45004,Cluster-34894.79917,Cluster-11760.0,Cluster-34894.66591,Cluster-34894.11265,Cluster-34894.73870,Cluster-34894.15621,Cluster-34894.36612,Cluster-34894.95237,Cluster-34894.42568,Cl…
GO:0016814	hydrolase activity, acting on carbon-nitrogen (but not peptide) bonds, in cyclic amidines	molecular_function	0.56019	1	3	1654	84	49533	Cluster-34894.36549,Cluster-34894.99918,Cluster-34894.97414
GO:0007623	circadian rhythm	biological_process	0.56071	1	2	1654	50	49533	Cluster-34894.92978,Cluster-34894.81610
GO:0035257	nuclear hormone receptor binding	molecular_function	0.56204	1	1	1654	23	49533	Cluster-34894.43248
GO:0051427	hormone receptor binding	molecular_function	0.56204	1	1	1654	23	49533	Cluster-34894.43248
GO:0016703	oxidoreductase activity, acting on single donors with incorporation of molecular oxygen, incorporation of one atom of oxygen (internal monooxygenases or internal mixed function oxidases)	molecular_function	0.56361	1	1	1654	22	49533	Cluster-34894.19990
GO:0019222	regulation of metabolic process	biological_process	0.56495	1	201	1654	5820	49533	Cluster-34894.54542,Cluster-34894.81610,Cluster-34894.54456,Cluster-34894.16662,Cluster-34894.32665,Cluster-34894.6241,Cluster-34894.45300,Cluster-34894.10023,Cluster-34894.58724,Cluster-34894.84520,Cluster-16758.1,Cluster-25895.1,Cluster-30483.0,Cluster-34894.78962,Cluster-34894.11547,Cluster-34894.82747,Cluster-34894.61778,Cluster-34894.95357,Cluster-34894.11711,Cluster-34894.69437,Cluster-3489…
GO:0032886	regulation of microtubule-based process	biological_process	0.56528	1	4	1654	115	49533	Cluster-34894.96049,Cluster-34894.16182,Cluster-34894.19751,Cluster-34894.12466
GO:0070507	regulation of microtubule cytoskeleton organization	biological_process	0.56528	1	4	1654	115	49533	Cluster-34894.96049,Cluster-34894.16182,Cluster-34894.19751,Cluster-34894.12466
GO:0000281	mitotic cytokinesis	biological_process	0.56655	1	10	1654	293	49533	Cluster-19252.0,Cluster-34894.59925,Cluster-34894.10023,Cluster-34894.45995,Cluster-34894.48898,Cluster-34894.15710,Cluster-34894.16182,Cluster-34894.80873,Cluster-34894.79588,Cluster-34894.15712
GO:0061640	cytoskeleton-dependent cytokinesis	biological_process	0.56655	1	10	1654	293	49533	Cluster-34894.80873,Cluster-34894.79588,Cluster-34894.15712,Cluster-34894.16182,Cluster-34894.10023,Cluster-34894.45995,Cluster-34894.48898,Cluster-34894.15710,Cluster-19252.0,Cluster-34894.59925
GO:0000904	cell morphogenesis involved in differentiation	biological_process	0.56743	1	5	1654	139	49533	Cluster-37016.0,Cluster-34894.62381,Cluster-34894.35044,Cluster-34894.64754,Cluster-34894.62000
GO:0043648	dicarboxylic acid metabolic process	biological_process	0.56771	1	7	1654	205	49533	Cluster-34894.95221,Cluster-34894.59881,Cluster-34894.29908,Cluster-16718.0,Cluster-34894.10810,Cluster-34894.8401,Cluster-34894.98548
GO:0006397	mRNA processing	biological_process	0.56773	1	16	1654	477	49533	Cluster-34894.84117,Cluster-25895.1,Cluster-34894.101047,Cluster-34894.102519,Cluster-34894.1073,Cluster-34894.15239,Cluster-34894.71301,Cluster-34894.25010,Cluster-34894.22822,Cluster-34894.11548,Cluster-34894.42954,Cluster-34894.99031,Cluster-34894.80154,Cluster-34894.45300,Cluster-34894.30338,Cluster-34894.57548
GO:1990204	oxidoreductase complex	cellular_component	0.56812	1	5	1654	152	49533	Cluster-34894.86389,Cluster-34894.87268,Cluster-34894.81166,Cluster-34894.38003,Cluster-34894.26738
GO:0010817	regulation of hormone levels	biological_process	0.56838	1	2	1654	47	49533	Cluster-34894.61730,Cluster-34894.61733
GO:0042445	hormone metabolic process	biological_process	0.56838	1	2	1654	47	49533	Cluster-34894.61730,Cluster-34894.61733
GO:0030182	neuron differentiation	biological_process	0.56889	1	6	1654	165	49533	Cluster-34894.62000,Cluster-34894.62381,Cluster-37016.0,Cluster-34894.35044,Cluster-34894.64754,Cluster-34894.63685
GO:0048699	generation of neurons	biological_process	0.56889	1	6	1654	165	49533	Cluster-34894.63685,Cluster-34894.64754,Cluster-34894.62381,Cluster-37016.0,Cluster-34894.35044,Cluster-34894.62000
GO:0031099	regeneration	biological_process	0.569	1	2	1654	50	49533	Cluster-26774.0,Cluster-34894.82713
GO:0042246	tissue regeneration	biological_process	0.569	1	2	1654	50	49533	Cluster-34894.82713,Cluster-26774.0
GO:0048589	developmental growth	biological_process	0.569	1	2	1654	50	49533	Cluster-26774.0,Cluster-34894.82713
GO:0004383	guanylate cyclase activity	molecular_function	0.57159	1	1	1654	21	49533	Cluster-34894.17060
GO:0006182	cGMP biosynthetic process	biological_process	0.57159	1	1	1654	21	49533	Cluster-34894.17060
GO:0046068	cGMP metabolic process	biological_process	0.57159	1	1	1654	21	49533	Cluster-34894.17060
GO:0006820	anion transport	biological_process	0.57284	1	16	1654	465	49533	Cluster-34894.88450,Cluster-34894.15804,Cluster-23506.0,Cluster-34894.70759,Cluster-34894.47234,Cluster-34894.16651,Cluster-34894.19496,Cluster-34894.50774,Cluster-34894.27174,Cluster-34894.29411,Cluster-34894.13522,Cluster-34894.99500,Cluster-34894.8751,Cluster-34894.96289,Cluster-34894.59585,Cluster-34894.41713
GO:0030151	molybdenum ion binding	molecular_function	0.57315	1	1	1654	22	49533	Cluster-34894.95617
GO:0016782	transferase activity, transferring sulfur-containing groups	molecular_function	0.57334	1	5	1654	147	49533	Cluster-34894.64773,Cluster-34894.85191,Cluster-34894.73062,Cluster-34894.27066,Cluster-16718.0
GO:0046873	metal ion transmembrane transporter activity	molecular_function	0.57357	1	44	1654	1299	49533	Cluster-34894.53033,Cluster-15271.0,Cluster-34894.55621,Cluster-34894.22411,Cluster-34894.66729,Cluster-34894.66806,Cluster-34894.22373,Cluster-34894.73678,Cluster-34894.62299,Cluster-34894.57201,Cluster-34894.58030,Cluster-34894.51294,Cluster-34894.15804,Cluster-34894.104516,Cluster-34894.97672,Cluster-34894.7011,Cluster-34894.45002,Cluster-34894.37600,Cluster-34894.29868,Cluster-34894.58281,Clu…
GO:0045995	regulation of embryonic development	biological_process	0.5737	1	2	1654	58	49533	Cluster-34894.21275,Cluster-34894.60314
GO:0016701	oxidoreductase activity, acting on single donors with incorporation of molecular oxygen	molecular_function	0.57414	1	4	1654	114	49533	Cluster-34894.65517,Cluster-26286.0,Cluster-34894.19990,Cluster-34894.62363
GO:0008443	phosphofructokinase activity	molecular_function	0.57431	1	2	1654	54	49533	Cluster-34894.52311,Cluster-34894.15240
GO:0004386	helicase activity	molecular_function	0.57539	1	14	1654	397	49533	Cluster-26628.0,Cluster-34894.96812,Cluster-34894.32236,Cluster-34894.95237,Cluster-34894.15653,Cluster-34894.26752,Cluster-34894.81176,Cluster-34894.40392,Cluster-34894.93280,Cluster-34894.83148,Cluster-34894.64310,Cluster-34894.107068,Cluster-34894.29868,Cluster-34894.7700
GO:0019899	enzyme binding	molecular_function	0.57546	1	10	1654	306	49533	Cluster-34894.79588,Cluster-34894.58030,Cluster-34894.19751,Cluster-34894.45300,Cluster-34894.95778,Cluster-34894.15715,Cluster-34894.95221,Cluster-34894.103764,Cluster-34894.66963,Cluster-34894.67851
GO:0009129	pyrimidine nucleoside monophosphate metabolic process	biological_process	0.57564	1	1	1654	24	49533	Cluster-34894.17808
GO:0009130	pyrimidine nucleoside monophosphate biosynthetic process	biological_process	0.57564	1	1	1654	24	49533	Cluster-34894.17808
GO:0009157	deoxyribonucleoside monophosphate biosynthetic process	biological_process	0.57564	1	1	1654	24	49533	Cluster-34894.17808
GO:0009176	pyrimidine deoxyribonucleoside monophosphate metabolic process	biological_process	0.57564	1	1	1654	24	49533	Cluster-34894.17808
GO:0009177	pyrimidine deoxyribonucleoside monophosphate biosynthetic process	biological_process	0.57564	1	1	1654	24	49533	Cluster-34894.17808
GO:0009221	pyrimidine deoxyribonucleotide biosynthetic process	biological_process	0.57564	1	1	1654	24	49533	Cluster-34894.17808
GO:0009263	deoxyribonucleotide biosynthetic process	biological_process	0.57564	1	1	1654	24	49533	Cluster-34894.17808
GO:0009265	2'-deoxyribonucleotide biosynthetic process	biological_process	0.57564	1	1	1654	24	49533	Cluster-34894.17808
GO:0046385	deoxyribose phosphate biosynthetic process	biological_process	0.57564	1	1	1654	24	49533	Cluster-34894.17808
GO:0004064	arylesterase activity	molecular_function	0.576	1	1	1654	22	49533	Cluster-34894.15239
GO:0016740	transferase activity	molecular_function	0.57644	1	242	1654	7056	49533	Cluster-34894.70519,Cluster-34894.13456,Cluster-34894.15887,Cluster-34894.86397,Cluster-34894.10499,Cluster-34894.11431,Cluster-34894.24533,Cluster-34894.22821,Cluster-34894.61974,Cluster-34894.100752,Cluster-34894.50527,Cluster-34894.52311,Cluster-18203.0,Cluster-34894.100795,Cluster-34894.49396,Cluster-34894.63010,Cluster-34894.77905,Cluster-34894.63117,Cluster-15271.0,Cluster-34894.90167,Clust…
GO:0033179	proton-transporting V-type ATPase, V0 domain	cellular_component	0.5804	1	8	1654	243	49533	Cluster-34894.18055,Cluster-34894.46259,Cluster-34894.76583,Cluster-34894.100528,Cluster-34894.79588,Cluster-34894.97722,Cluster-34894.90034,Cluster-34894.47234
GO:0008172	S-methyltransferase activity	molecular_function	0.58087	1	2	1654	57	49533	Cluster-34894.8401,Cluster-34894.95221
GO:0016857	racemase and epimerase activity, acting on carbohydrates and derivatives	molecular_function	0.58283	1	1	1654	27	49533	Cluster-32090.1
GO:0032271	regulation of protein polymerization	biological_process	0.58378	1	3	1654	85	49533	Cluster-34894.77674,Cluster-34894.43248,Cluster-34894.12466
GO:0043254	regulation of protein complex assembly	biological_process	0.58378	1	3	1654	85	49533	Cluster-34894.43248,Cluster-34894.12466,Cluster-34894.77674
GO:0006888	ER to Golgi vesicle-mediated transport	biological_process	0.58402	1	8	1654	278	49533	Cluster-34894.47996,Cluster-34894.79362,Cluster-34894.79358,Cluster-34894.33419,Cluster-34894.26768,Cluster-34894.81805,Cluster-34894.33082,Cluster-34894.68037
GO:0004866	endopeptidase inhibitor activity	molecular_function	0.58403	1	9	1654	262	49533	Cluster-17321.0,Cluster-34894.55757,Cluster-16584.0,Cluster-34894.20041,Cluster-34894.18176,Cluster-34894.53632,Cluster-34894.40228,Cluster-31952.0,Cluster-34894.55758
GO:0061135	endopeptidase regulator activity	molecular_function	0.58403	1	9	1654	262	49533	Cluster-34894.53632,Cluster-34894.40228,Cluster-34894.18176,Cluster-34894.55758,Cluster-31952.0,Cluster-34894.55757,Cluster-17321.0,Cluster-16584.0,Cluster-34894.20041
GO:0015711	organic anion transport	biological_process	0.58415	1	9	1654	262	49533	Cluster-34894.27174,Cluster-34894.88450,Cluster-34894.15804,Cluster-34894.47234,Cluster-34894.99500,Cluster-34894.41713,Cluster-34894.19496,Cluster-34894.96289,Cluster-34894.8751
GO:0009896	positive regulation of catabolic process	biological_process	0.58424	1	9	1654	277	49533	Cluster-14514.0,Cluster-34894.12862,Cluster-34894.90034,Cluster-34894.45300,Cluster-34894.46259,Cluster-34894.69959,Cluster-34894.49717,Cluster-34894.27174,Cluster-34894.63685
GO:0010508	positive regulation of autophagy	biological_process	0.58424	1	9	1654	277	49533	Cluster-34894.49717,Cluster-34894.46259,Cluster-34894.45300,Cluster-34894.69959,Cluster-34894.63685,Cluster-34894.27174,Cluster-14514.0,Cluster-34894.90034,Cluster-34894.12862
GO:0031331	positive regulation of cellular catabolic process	biological_process	0.58424	1	9	1654	277	49533	Cluster-14514.0,Cluster-34894.90034,Cluster-34894.12862,Cluster-34894.49717,Cluster-34894.45300,Cluster-34894.46259,Cluster-34894.69959,Cluster-34894.63685,Cluster-34894.27174
GO:0006787	porphyrin-containing compound catabolic process	biological_process	0.58496	1	1	1654	22	49533	Cluster-34894.109736
GO:0033015	tetrapyrrole catabolic process	biological_process	0.58496	1	1	1654	22	49533	Cluster-34894.109736
GO:0008063	Toll signaling pathway	biological_process	0.58519	1	1	1654	24	49533	Cluster-34894.11566
GO:0009405	pathogenesis	biological_process	0.58647	1	30	1654	903	49533	Cluster-34894.7444,Cluster-34894.60924,Cluster-34894.49352,Cluster-34894.64041,Cluster-34894.60834,Cluster-34894.63090,Cluster-34894.88440,Cluster-34894.61006,Cluster-34894.29377,Cluster-34894.28196,Cluster-34894.65036,Cluster-34894.66808,Cluster-34894.98572,Cluster-34894.98322,Cluster-34894.64310,Cluster-34894.100797,Cluster-34894.28001,Cluster-34894.67139,Cluster-34894.18400,Cluster-34894.10270…
GO:0071806	protein transmembrane transport	biological_process	0.58689	1	3	1654	89	49533	Cluster-34894.15621,Cluster-34894.29411,Cluster-34894.29410
GO:0008509	anion transmembrane transporter activity	molecular_function	0.58804	1	8	1654	228	49533	Cluster-34894.15804,Cluster-34894.29411,Cluster-23506.0,Cluster-34894.47234,Cluster-34894.16651,Cluster-34894.19496,Cluster-34894.96289,Cluster-34894.50774
GO:0016788	hydrolase activity, acting on ester bonds	molecular_function	0.58838	1	77	1654	2205	49533	Cluster-34894.55487,Cluster-34894.97238,Cluster-34894.51663,Cluster-34894.11548,Cluster-34894.97043,Cluster-34894.46856,Cluster-34894.49674,Cluster-34894.48533,Cluster-34894.29377,Cluster-34894.99200,Cluster-34894.82207,Cluster-34894.73498,Cluster-34894.14945,Cluster-34894.98267,Cluster-34894.56383,Cluster-34894.61859,Cluster-34894.6051,Cluster-34894.97235,Cluster-34894.57083,Cluster-34345.0,Clus…
GO:0016010	dystrophin-associated glycoprotein complex	cellular_component	0.58904	1	3	1654	89	49533	Cluster-34894.100797,Cluster-34894.65039,Cluster-34894.78970
GO:0006432	phenylalanyl-tRNA aminoacylation	biological_process	0.58961	1	1	1654	25	49533	Cluster-34894.14416
GO:0017038	protein import	biological_process	0.58993	1	14	1654	429	49533	Cluster-34894.68407,Cluster-34894.26884,Cluster-34894.21651,Cluster-34894.15621,Cluster-34894.72073,Cluster-34894.16182,Cluster-34894.15714,Cluster-34894.14832,Cluster-34894.96049,Cluster-34894.29411,Cluster-34894.29410,Cluster-34894.69959,Cluster-34894.10023,Cluster-34894.95221
GO:0010038	response to metal ion	biological_process	0.59119	1	2	1654	60	49533	Cluster-34894.102233,Cluster-34894.64699
GO:0019362	pyridine nucleotide metabolic process	biological_process	0.59345	1	7	1654	204	49533	Cluster-34894.61254,Cluster-12597.1,Cluster-34894.86397,Cluster-34894.61730,Cluster-34894.81829,Cluster-34894.61252,Cluster-34894.63117
GO:0030155	regulation of cell adhesion	biological_process	0.59519	1	2	1654	61	49533	Cluster-34894.21275,Cluster-34894.60314
GO:0022008	neurogenesis	biological_process	0.59547	1	6	1654	170	49533	Cluster-34894.62000,Cluster-34894.64754,Cluster-34894.63685,Cluster-34894.62381,Cluster-37016.0,Cluster-34894.35044
GO:0006109	regulation of carbohydrate metabolic process	biological_process	0.59652	1	1	1654	23	49533	Cluster-34894.48260
GO:0051493	regulation of cytoskeleton organization	biological_process	0.59729	1	6	1654	181	49533	Cluster-34894.19751,Cluster-34894.43248,Cluster-34894.12466,Cluster-34894.96049,Cluster-34894.77674,Cluster-34894.16182
GO:0005618	cell wall	cellular_component	0.59733	1	2	1654	61	49533	Cluster-34894.10499,Cluster-34894.31051
GO:0042302	structural constituent of cuticle	molecular_function	0.59856	1	2	1654	57	49533	Cluster-34894.43422,Cluster-34894.68494
GO:0009007	site-specific DNA-methyltransferase (adenine-specific) activity	molecular_function	0.59903	1	1	1654	26	49533	Cluster-34894.75683
GO:0009008	DNA-methyltransferase activity	molecular_function	0.59903	1	1	1654	26	49533	Cluster-34894.75683
GO:0032775	DNA methylation on adenine	biological_process	0.59903	1	1	1654	26	49533	Cluster-34894.75683
GO:0015718	monocarboxylic acid transport	biological_process	0.59991	1	2	1654	58	49533	Cluster-34894.27174,Cluster-34894.99500
GO:0009378	four-way junction helicase activity	molecular_function	0.60055	1	3	1654	82	49533	Cluster-34894.107068,Cluster-26628.0,Cluster-34894.95237
GO:0009379	Holliday junction helicase complex	cellular_component	0.60055	1	3	1654	82	49533	Cluster-26628.0,Cluster-34894.95237,Cluster-34894.107068
GO:0048476	Holliday junction resolvase complex	cellular_component	0.60055	1	3	1654	82	49533	Cluster-26628.0,Cluster-34894.95237,Cluster-34894.107068
GO:0044462	external encapsulating structure part	cellular_component	0.60102	1	2	1654	60	49533	Cluster-34894.36640,Cluster-34894.46661
GO:0071702	organic substance transport	biological_process	0.6017	1	101	1654	3029	49533	Cluster-34894.60834,Cluster-34894.26768,Cluster-34894.32236,Cluster-34894.26884,Cluster-34894.64041,Cluster-34894.38069,Cluster-34894.58719,Cluster-34894.44966,Cluster-34894.95221,Cluster-34894.88450,Cluster-34894.42266,Cluster-34894.61660,Cluster-34894.27484,Cluster-34894.45995,Cluster-34894.19751,Cluster-34894.95778,Cluster-34894.53919,Cluster-34894.101377,Cluster-34894.21651,Cluster-34894.8501…
GO:0008135	translation factor activity, RNA binding	molecular_function	0.60414	1	8	1654	247	49533	Cluster-34894.53349,Cluster-34894.7298,Cluster-34894.93414,Cluster-30483.0,Cluster-34894.54655,Cluster-34894.17406,Cluster-34894.44517,Cluster-34894.104224
GO:0016482	cytoplasmic transport	biological_process	0.60419	1	29	1654	921	49533	Cluster-34894.79358,Cluster-34894.80202,Cluster-34894.79362,Cluster-34894.52311,Cluster-34894.29410,Cluster-34894.29411,Cluster-34894.47996,Cluster-34894.10023,Cluster-34894.15621,Cluster-34894.72073,Cluster-34894.21651,Cluster-34894.96049,Cluster-34894.15714,Cluster-34894.14832,Cluster-34894.91000,Cluster-34894.33419,Cluster-34894.75421,Cluster-34894.95221,Cluster-34894.82207,Cluster-34894.69959…
GO:0097034	mitochondrial respiratory chain complex IV biogenesis	biological_process	0.6048	1	1	1654	30	49533	Cluster-34894.57196
GO:0007342	fusion of sperm to egg plasma membrane	biological_process	0.60481	1	1	1654	30	49533	Cluster-34894.82431
GO:0045026	plasma membrane fusion	biological_process	0.60481	1	1	1654	30	49533	Cluster-34894.82431
GO:0016702	oxidoreductase activity, acting on single donors with incorporation of molecular oxygen, incorporation of two atoms of oxygen	molecular_function	0.60537	1	3	1654	89	49533	Cluster-26286.0,Cluster-34894.62363,Cluster-34894.65517
GO:0019200	carbohydrate kinase activity	molecular_function	0.60556	1	2	1654	57	49533	Cluster-34894.52311,Cluster-34894.15240
GO:0005768	endosome	cellular_component	0.60603	1	1	1654	28	49533	Cluster-34894.31028
GO:0044440	endosomal part	cellular_component	0.60603	1	1	1654	28	49533	Cluster-34894.31028
GO:0048870	cell motility	biological_process	0.60661	1	14	1654	440	49533	Cluster-34894.49717,Cluster-34894.19751,Cluster-34894.45300,Cluster-34894.60314,Cluster-34894.46259,Cluster-34894.21275,Cluster-14514.0,Cluster-34894.15712,Cluster-34894.98727,Cluster-34894.15713,Cluster-34894.70207,Cluster-34894.14094,Cluster-34894.15714,Cluster-34894.96049
GO:0051674	localization of cell	biological_process	0.60661	1	14	1654	440	49533	Cluster-34894.49717,Cluster-34894.45300,Cluster-34894.19751,Cluster-34894.46259,Cluster-34894.60314,Cluster-34894.21275,Cluster-14514.0,Cluster-34894.15712,Cluster-34894.98727,Cluster-34894.15713,Cluster-34894.70207,Cluster-34894.14094,Cluster-34894.15714,Cluster-34894.96049
GO:0043462	regulation of ATPase activity	biological_process	0.60688	1	1	1654	30	49533	Cluster-34894.51255
GO:0008176	tRNA (guanine-N7-)-methyltransferase activity	molecular_function	0.6069	1	1	1654	25	49533	Cluster-34894.41191
GO:0005747	mitochondrial respiratory chain complex I	cellular_component	0.60781	1	2	1654	61	49533	Cluster-34894.86389,Cluster-34894.26738
GO:0030964	NADH dehydrogenase complex	cellular_component	0.60781	1	2	1654	61	49533	Cluster-34894.86389,Cluster-34894.26738
GO:0045271	respiratory chain complex I	cellular_component	0.60781	1	2	1654	61	49533	Cluster-34894.86389,Cluster-34894.26738
GO:0012505	endomembrane system	cellular_component	0.60816	1	53	1654	1634	49533	Cluster-34894.81805,Cluster-34894.25747,Cluster-34894.49047,Cluster-34894.68037,Cluster-34894.52934,Cluster-34894.13896,Cluster-34894.7011,Cluster-25024.0,Cluster-34894.12115,Cluster-34894.45002,Cluster-34894.15713,Cluster-34894.33419,Cluster-29404.0,Cluster-34894.60277,Cluster-34894.67141,Cluster-34894.46289,Cluster-34894.45300,Cluster-34894.13361,Cluster-34894.83060,Cluster-34894.47996,Cluster-…
GO:0030141	secretory granule	cellular_component	0.61016	1	1	1654	25	49533	Cluster-34894.16252
GO:0000910	cytokinesis	biological_process	0.61179	1	11	1654	338	49533	Cluster-25114.0,Cluster-19252.0,Cluster-34894.59925,Cluster-34894.48898,Cluster-34894.10023,Cluster-34894.45995,Cluster-34894.15710,Cluster-34894.16182,Cluster-34894.80873,Cluster-34894.79588,Cluster-34894.15712
GO:0030076	light-harvesting complex	cellular_component	0.61331	1	2	1654	60	49533	Cluster-34894.51890,Cluster-34894.30922
GO:0003964	RNA-directed DNA polymerase activity	molecular_function	0.61416	1	1	1654	28	49533	Cluster-34894.54640
GO:0006278	RNA-dependent DNA replication	biological_process	0.61416	1	1	1654	28	49533	Cluster-34894.54640
GO:0046058	cAMP metabolic process	biological_process	0.61475	1	1	1654	25	49533	Cluster-34894.46408
GO:0006935	chemotaxis	biological_process	0.61487	1	12	1654	381	49533	Cluster-37016.0,Cluster-34894.19125,Cluster-13177.1,Cluster-34894.47768,Cluster-34894.64754,Cluster-34894.35864,Cluster-34894.96049,Cluster-34894.62381,Cluster-34894.101694,Cluster-34894.35044,Cluster-14514.0,Cluster-34894.62000
GO:0008192	RNA guanylyltransferase activity	molecular_function	0.61512	1	1	1654	27	49533	Cluster-34894.15239
GO:0070568	guanylyltransferase activity	molecular_function	0.61512	1	1	1654	27	49533	Cluster-34894.15239
GO:0016835	carbon-oxygen lyase activity	molecular_function	0.61537	1	6	1654	185	49533	Cluster-34894.87239,Cluster-34894.42550,Cluster-34894.33912,Cluster-36048.0,Cluster-34894.96635,Cluster-34894.96637
GO:0030955	potassium ion binding	molecular_function	0.61544	1	1	1654	28	49533	Cluster-34894.86397
GO:0031420	alkali metal ion binding	molecular_function	0.61544	1	1	1654	28	49533	Cluster-34894.86397
GO:0031324	negative regulation of cellular metabolic process	biological_process	0.61592	1	9	1654	275	49533	Cluster-19183.0,Cluster-34894.17604,Cluster-34894.81610,Cluster-34894.2329,Cluster-34894.101011,Cluster-34894.6241,Cluster-34894.98656,Cluster-34894.13664,Cluster-34894.71563
GO:0003906	DNA-(apurinic or apyrimidinic site) lyase activity	molecular_function	0.61611	1	1	1654	27	49533	Cluster-36048.0
GO:0007399	nervous system development	biological_process	0.61639	1	6	1654	173	49533	Cluster-34894.62000,Cluster-34894.63685,Cluster-34894.64754,Cluster-34894.35044,Cluster-37016.0,Cluster-34894.62381
GO:0006221	pyrimidine nucleotide biosynthetic process	biological_process	0.6174	1	2	1654	59	49533	Cluster-34894.56367,Cluster-34894.17808
GO:0008091	spectrin	cellular_component	0.6179	1	1	1654	23	49533	Cluster-34894.63685
GO:0030507	spectrin binding	molecular_function	0.6179	1	1	1654	23	49533	Cluster-34894.63685
GO:0015698	inorganic anion transport	biological_process	0.61791	1	5	1654	150	49533	Cluster-34894.59585,Cluster-34894.50774,Cluster-23506.0,Cluster-34894.13522,Cluster-34894.70759
GO:0009888	tissue development	biological_process	0.61826	1	4	1654	119	49533	Cluster-34894.82713,Cluster-26774.0,Cluster-34894.96944,Cluster-34894.101011
GO:0000245	spliceosomal complex assembly	biological_process	0.61977	1	1	1654	29	49533	Cluster-34894.57548
GO:0008146	sulfotransferase activity	molecular_function	0.62094	1	4	1654	123	49533	Cluster-34894.64773,Cluster-34894.85191,Cluster-34894.73062,Cluster-34894.27066
GO:0048511	rhythmic process	biological_process	0.62149	1	2	1654	57	49533	Cluster-34894.92978,Cluster-34894.81610
GO:0016579	protein deubiquitination	biological_process	0.62197	1	6	1654	180	49533	Cluster-34894.72901,Cluster-34894.17744,Cluster-34894.38003,Cluster-34894.14416,Cluster-34894.16562,Cluster-34894.53867
GO:0036459	ubiquitinyl hydrolase activity	molecular_function	0.62197	1	6	1654	180	49533	Cluster-34894.53867,Cluster-34894.16562,Cluster-34894.14416,Cluster-34894.38003,Cluster-34894.17744,Cluster-34894.72901
GO:0070646	protein modification by small protein removal	biological_process	0.62197	1	6	1654	180	49533	Cluster-34894.72901,Cluster-34894.17744,Cluster-34894.14416,Cluster-34894.16562,Cluster-34894.53867,Cluster-34894.38003
GO:0008514	organic anion transmembrane transporter activity	molecular_function	0.6226	1	4	1654	116	49533	Cluster-34894.15804,Cluster-34894.19496,Cluster-34894.96289,Cluster-34894.47234
GO:0048523	negative regulation of cellular process	biological_process	0.62283	1	16	1654	482	49533	Cluster-34894.98656,Cluster-34894.13664,Cluster-34894.8282,Cluster-34894.77674,Cluster-19183.0,Cluster-34894.17604,Cluster-34894.2329,Cluster-34894.13287,Cluster-34894.60277,Cluster-34894.71563,Cluster-34894.78867,Cluster-34894.43248,Cluster-34894.81610,Cluster-34894.6241,Cluster-34894.101011,Cluster-34894.65876
GO:0032465	regulation of cytokinesis	biological_process	0.6229	1	1	1654	28	49533	Cluster-25114.0
GO:0010927	cellular component assembly involved in morphogenesis	biological_process	0.62376	1	1	1654	29	49533	Cluster-34894.33109
GO:0042384	cilium assembly	biological_process	0.62376	1	1	1654	29	49533	Cluster-34894.33109
GO:0060271	cilium morphogenesis	biological_process	0.62376	1	1	1654	29	49533	Cluster-34894.33109
GO:0001948	glycoprotein binding	molecular_function	0.62397	1	1	1654	30	49533	Cluster-18299.0
GO:0043394	proteoglycan binding	molecular_function	0.62397	1	1	1654	30	49533	Cluster-18299.0
GO:0043395	heparan sulfate proteoglycan binding	molecular_function	0.62397	1	1	1654	30	49533	Cluster-18299.0
GO:0019080	viral gene expression	biological_process	0.62662	1	3	1654	90	49533	Cluster-34894.14125,Cluster-34894.89318,Cluster-34894.41361
GO:0051187	cofactor catabolic process	biological_process	0.62677	1	1	1654	25	49533	Cluster-34894.109736
GO:0048468	cell development	biological_process	0.62715	1	7	1654	207	49533	Cluster-34894.62000,Cluster-34894.63685,Cluster-34894.96944,Cluster-34894.64754,Cluster-37016.0,Cluster-34894.62381,Cluster-34894.35044
GO:0031554	regulation of DNA-templated transcription, termination	biological_process	0.62747	1	1	1654	29	49533	Cluster-34894.36683
GO:0031555	transcriptional attenuation	biological_process	0.62747	1	1	1654	29	49533	Cluster-34894.36683
GO:0031556	transcriptional attenuation by ribosome	biological_process	0.62747	1	1	1654	29	49533	Cluster-34894.36683
GO:0051336	regulation of hydrolase activity	biological_process	0.62768	1	16	1654	471	49533	Cluster-13907.0,Cluster-34894.5263,Cluster-34894.88440,Cluster-34894.81525,Cluster-34894.45734,Cluster-34894.109762,Cluster-34894.73279,Cluster-34894.39409,Cluster-34894.93280,Cluster-34894.89541,Cluster-34894.51255,Cluster-34894.97991,Cluster-34894.9314,Cluster-34894.81524,Cluster-34894.96661,Cluster-34894.15299
GO:0042330	taxis	biological_process	0.62863	1	12	1654	385	49533	Cluster-37016.0,Cluster-13177.1,Cluster-34894.19125,Cluster-34894.96049,Cluster-34894.62381,Cluster-34894.101694,Cluster-34894.35044,Cluster-34894.47768,Cluster-34894.35864,Cluster-34894.64754,Cluster-34894.62000,Cluster-14514.0
GO:0009605	response to external stimulus	biological_process	0.62872	1	30	1654	936	49533	Cluster-13177.1,Cluster-34894.82976,Cluster-34894.95221,Cluster-37016.0,Cluster-16764.0,Cluster-34894.56478,Cluster-34894.60081,Cluster-34894.62000,Cluster-34894.21131,Cluster-14514.0,Cluster-34894.35044,Cluster-34894.101694,Cluster-34894.62381,Cluster-34894.60834,Cluster-34894.35864,Cluster-34894.58314,Cluster-34894.16182,Cluster-34894.59587,Cluster-34894.46259,Cluster-34894.19125,Cluster-34894.…
GO:0019901	protein kinase binding	molecular_function	0.62918	1	4	1654	133	49533	Cluster-34894.79588,Cluster-34894.45300,Cluster-34894.95221,Cluster-34894.15715
GO:0006606	protein import into nucleus	biological_process	0.62931	1	11	1654	349	49533	Cluster-34894.95221,Cluster-34894.10023,Cluster-34894.69959,Cluster-34894.21651,Cluster-34894.16182,Cluster-34894.72073,Cluster-34894.15714,Cluster-34894.14832,Cluster-34894.96049,Cluster-34894.68407,Cluster-34894.26884
GO:0034504	protein localization to nucleus	biological_process	0.62931	1	11	1654	349	49533	Cluster-34894.95221,Cluster-34894.10023,Cluster-34894.69959,Cluster-34894.14832,Cluster-34894.15714,Cluster-34894.96049,Cluster-34894.21651,Cluster-34894.72073,Cluster-34894.16182,Cluster-34894.68407,Cluster-34894.26884
GO:0044744	protein targeting to nucleus	biological_process	0.62931	1	11	1654	349	49533	Cluster-34894.68407,Cluster-34894.26884,Cluster-34894.15714,Cluster-34894.14832,Cluster-34894.96049,Cluster-34894.21651,Cluster-34894.16182,Cluster-34894.72073,Cluster-34894.69959,Cluster-34894.10023,Cluster-34894.95221
GO:0051170	nuclear import	biological_process	0.62931	1	11	1654	349	49533	Cluster-34894.10023,Cluster-34894.69959,Cluster-34894.95221,Cluster-34894.26884,Cluster-34894.68407,Cluster-34894.16182,Cluster-34894.72073,Cluster-34894.21651,Cluster-34894.96049,Cluster-34894.15714,Cluster-34894.14832
GO:1902593	single-organism nuclear import	biological_process	0.62931	1	11	1654	349	49533	Cluster-34894.95221,Cluster-34894.10023,Cluster-34894.69959,Cluster-34894.21651,Cluster-34894.72073,Cluster-34894.16182,Cluster-34894.15714,Cluster-34894.14832,Cluster-34894.96049,Cluster-34894.68407,Cluster-34894.26884
GO:0051171	regulation of nitrogen compound metabolic process	biological_process	0.62961	1	163	1654	4796	49533	Cluster-34894.44965,Cluster-34894.54883,Cluster-34894.45429,Cluster-34894.78752,Cluster-34894.64310,Cluster-34894.2329,Cluster-34894.35796,Cluster-34894.75683,Cluster-34894.43248,Cluster-34894.92978,Cluster-34894.42568,Cluster-34894.97905,Cluster-34894.101777,Cluster-34894.14416,Cluster-34894.22822,Cluster-34894.25747,Cluster-34894.98656,Cluster-34894.58314,Cluster-34894.100921,Cluster-34894.5647…
GO:0004861	cyclin-dependent protein serine/threonine kinase inhibitor activity	molecular_function	0.63096	1	1	1654	26	49533	Cluster-34894.65876
GO:0005891	voltage-gated calcium channel complex	cellular_component	0.63142	1	1	1654	30	49533	Cluster-34894.58030
GO:0034704	calcium channel complex	cellular_component	0.63142	1	1	1654	30	49533	Cluster-34894.58030
GO:0006470	protein dephosphorylation	biological_process	0.63156	1	10	1654	291	49533	Cluster-34894.57084,Cluster-34894.57083,Cluster-34894.54542,Cluster-34894.62878,Cluster-34894.11396,Cluster-34894.49745,Cluster-34894.73498,Cluster-34894.99221,Cluster-34894.64976,Cluster-34894.11548
GO:0042611	MHC protein complex	cellular_component	0.63172	1	2	1654	60	49533	Cluster-34894.81721,Cluster-34894.75395
GO:0042613	MHC class II protein complex	cellular_component	0.63172	1	2	1654	60	49533	Cluster-34894.75395,Cluster-34894.81721
GO:0031323	regulation of cellular metabolic process	biological_process	0.63194	1	179	1654	5265	49533	Cluster-34894.99968,Cluster-34894.55720,Cluster-8832.1,Cluster-34894.37824,Cluster-34894.13664,Cluster-34894.36935,Cluster-34894.49717,Cluster-34894.44517,Cluster-34894.104224,Cluster-34894.82207,Cluster-34894.48260,Cluster-34894.65312,Cluster-34894.17604,Cluster-34894.67113,Cluster-19252.0,Cluster-34894.70046,Cluster-34894.101808,Cluster-34894.6976,Cluster-34894.35421,Cluster-34894.31740,Cluster…
GO:0006029	proteoglycan metabolic process	biological_process	0.63276	1	1	1654	26	49533	Cluster-34894.1649
GO:0030166	proteoglycan biosynthetic process	biological_process	0.63276	1	1	1654	26	49533	Cluster-34894.1649
GO:0019318	hexose metabolic process	biological_process	0.63291	1	10	1654	315	49533	Cluster-34894.86397,Cluster-12597.1,Cluster-32090.1,Cluster-34894.52311,Cluster-34894.81829,Cluster-34894.41391,Cluster-34894.97051,Cluster-34894.14094,Cluster-34894.67287,Cluster-34894.15240
GO:0000103	sulfate assimilation	biological_process	0.6331	1	1	1654	25	49533	Cluster-34894.59866
GO:0004020	adenylylsulfate kinase activity	molecular_function	0.6331	1	1	1654	25	49533	Cluster-34894.59866
GO:0015947	methane metabolic process	biological_process	0.63325	1	3	1654	94	49533	Cluster-34894.95221,Cluster-34894.26612,Cluster-34894.74877
GO:0043446	cellular alkane metabolic process	biological_process	0.63325	1	3	1654	94	49533	Cluster-34894.95221,Cluster-34894.74877,Cluster-34894.26612
GO:0042301	phosphate ion binding	molecular_function	0.63388	1	1	1654	26	49533	Cluster-10748.0
GO:0009289	pilus	cellular_component	0.63437	1	1	1654	27	49533	Cluster-34894.88538
GO:0016725	oxidoreductase activity, acting on CH or CH2 groups	molecular_function	0.6372	1	1	1654	28	49533	Cluster-34894.38003
GO:0002697	regulation of immune effector process	biological_process	0.63766	1	1	1654	28	49533	Cluster-18299.0
GO:0050688	regulation of defense response to virus	biological_process	0.63766	1	1	1654	28	49533	Cluster-18299.0
GO:0050690	regulation of defense response to virus by virus	biological_process	0.63766	1	1	1654	28	49533	Cluster-18299.0
GO:0009267	cellular response to starvation	biological_process	0.63785	1	1	1654	28	49533	Cluster-34894.41486
GO:0031667	response to nutrient levels	biological_process	0.63785	1	1	1654	28	49533	Cluster-34894.41486
GO:0031669	cellular response to nutrient levels	biological_process	0.63785	1	1	1654	28	49533	Cluster-34894.41486
GO:0042594	response to starvation	biological_process	0.63785	1	1	1654	28	49533	Cluster-34894.41486
GO:0016714	oxidoreductase activity, acting on paired donors, with incorporation or reduction of molecular oxygen, reduced pteridine as one donor, and incorporation of one atom of oxygen	molecular_function	0.63793	1	1	1654	27	49533	Cluster-34894.81972
GO:0009403	toxin biosynthetic process	biological_process	0.638	1	1	1654	27	49533	Cluster-34894.37401
GO:0070569	uridylyltransferase activity	molecular_function	0.63844	1	1	1654	30	49533	Cluster-34894.10033
GO:0004013	adenosylhomocysteinase activity	molecular_function	0.63876	1	1	1654	32	49533	Cluster-34894.101694
GO:0016801	hydrolase activity, acting on ether bonds	molecular_function	0.63876	1	1	1654	32	49533	Cluster-34894.101694
GO:0016802	trialkylsulfonium hydrolase activity	molecular_function	0.63876	1	1	1654	32	49533	Cluster-34894.101694
GO:0016894	endonuclease activity, active with either ribo- or deoxyribonucleic acids and producing 3'-phosphomonoesters	molecular_function	0.63885	1	1	1654	27	49533	Cluster-34345.0
GO:0009162	deoxyribonucleoside monophosphate metabolic process	biological_process	0.63928	1	1	1654	28	49533	Cluster-34894.17808
GO:0033108	mitochondrial respiratory chain complex assembly	biological_process	0.64169	1	1	1654	30	49533	Cluster-34894.57196
GO:0007031	peroxisome organization	biological_process	0.64188	1	2	1654	61	49533	Cluster-34894.57008,Cluster-34894.93780
GO:0030246	carbohydrate binding	molecular_function	0.64199	1	7	1654	222	49533	Cluster-34894.88212,Cluster-18299.0,Cluster-34894.89256,Cluster-34894.43464,Cluster-34894.17060,Cluster-5991.0,Cluster-34894.55719
GO:0022618	ribonucleoprotein complex assembly	biological_process	0.64264	1	1	1654	31	49533	Cluster-34894.57548
GO:0005230	extracellular ligand-gated ion channel activity	molecular_function	0.64335	1	3	1654	96	49533	Cluster-34894.7298,Cluster-34894.40735,Cluster-34894.50010
GO:0009968	negative regulation of signal transduction	biological_process	0.64335	1	1	1654	29	49533	Cluster-34894.13287
GO:0016829	lyase activity	molecular_function	0.64346	1	27	1654	829	49533	Cluster-34894.83331,Cluster-34894.14337,Cluster-34894.41391,Cluster-34894.59478,Cluster-34894.80043,Cluster-34894.66806,Cluster-34894.42550,Cluster-34894.33912,Cluster-34894.96637,Cluster-34894.62299,Cluster-34894.83329,Cluster-34894.71967,Cluster-34894.38742,Cluster-34894.47040,Cluster-34894.96635,Cluster-34894.21131,Cluster-28743.0,Cluster-34894.43602,Cluster-34894.37600,Cluster-34894.17060,Clu…
GO:0005911	cell-cell junction	cellular_component	0.64397	1	1	1654	29	49533	Cluster-34894.55958
GO:0022603	regulation of anatomical structure morphogenesis	biological_process	0.64506	1	3	1654	96	49533	Cluster-34894.31620,Cluster-34894.12862,Cluster-34894.59925
GO:0006835	dicarboxylic acid transport	biological_process	0.64548	1	3	1654	95	49533	Cluster-34894.15804,Cluster-34894.19496,Cluster-34894.41713
GO:0032270	positive regulation of cellular protein metabolic process	biological_process	0.64607	1	2	1654	66	49533	Cluster-34894.49745,Cluster-34894.54542
GO:0051247	positive regulation of protein metabolic process	biological_process	0.64607	1	2	1654	66	49533	Cluster-34894.54542,Cluster-34894.49745
GO:0006879	cellular iron ion homeostasis	biological_process	0.64637	1	1	1654	31	49533	Cluster-34894.60555
GO:0046916	cellular transition metal ion homeostasis	biological_process	0.64637	1	1	1654	31	49533	Cluster-34894.60555
GO:0055072	iron ion homeostasis	biological_process	0.64637	1	1	1654	31	49533	Cluster-34894.60555
GO:0015934	large ribosomal subunit	cellular_component	0.64643	1	1	1654	30	49533	Cluster-34894.18076
GO:0019887	protein kinase regulator activity	molecular_function	0.64683	1	3	1654	89	49533	Cluster-34894.70046,Cluster-34894.65876,Cluster-25895.1
GO:0060429	epithelium development	biological_process	0.64693	1	2	1654	62	49533	Cluster-34894.101011,Cluster-34894.96944
GO:0001071	nucleic acid binding transcription factor activity	molecular_function	0.64802	1	60	1654	1784	49533	Cluster-19252.0,Cluster-34894.99967,Cluster-34894.96585,Cluster-34894.43825,Cluster-34894.17604,Cluster-34894.67113,Cluster-34894.48218,Cluster-34894.11547,Cluster-34894.82747,Cluster-34894.69758,Cluster-34894.61778,Cluster-34894.25747,Cluster-34894.95357,Cluster-34894.11711,Cluster-34894.69437,Cluster-34894.81977,Cluster-34894.79586,Cluster-34894.99968,Cluster-34894.59925,Cluster-34894.96811,Clu…
GO:0003700	transcription factor activity, sequence-specific DNA binding	molecular_function	0.64802	1	60	1654	1784	49533	Cluster-34894.95357,Cluster-34894.25747,Cluster-34894.11711,Cluster-34894.69437,Cluster-34894.81977,Cluster-34894.79586,Cluster-34894.99968,Cluster-19252.0,Cluster-34894.96585,Cluster-34894.99967,Cluster-34894.67113,Cluster-34894.17604,Cluster-34894.43825,Cluster-34894.11547,Cluster-34894.48218,Cluster-34894.82747,Cluster-34894.69758,Cluster-34894.61778,Cluster-34894.1162,Cluster-34894.14337,Clus…
GO:0048500	signal recognition particle	cellular_component	0.64907	1	2	1654	61	49533	Cluster-34894.102323,Cluster-34894.64310
GO:0051920	peroxiredoxin activity	molecular_function	0.65067	1	1	1654	29	49533	Cluster-25267.0
GO:0033178	proton-transporting two-sector ATPase complex, catalytic domain	cellular_component	0.65116	1	4	1654	117	49533	Cluster-34894.15898,Cluster-34894.78905,Cluster-34894.40744,Cluster-34894.72073
GO:0070070	proton-transporting V-type ATPase complex assembly	biological_process	0.65239	1	1	1654	32	49533	Cluster-34894.15804
GO:0070072	vacuolar proton-transporting V-type ATPase complex assembly	biological_process	0.65239	1	1	1654	32	49533	Cluster-34894.15804
GO:0008408	3'-5' exonuclease activity	molecular_function	0.65377	1	3	1654	86	49533	Cluster-34894.63117,Cluster-11760.0,Cluster-34894.26738
GO:0008168	methyltransferase activity	molecular_function	0.65428	1	24	1654	733	49533	Cluster-34894.99221,Cluster-34894.99970,Cluster-34894.10620,Cluster-34894.7647,Cluster-34894.8401,Cluster-34894.41191,Cluster-34894.42954,Cluster-34894.63014,Cluster-34894.95221,Cluster-34894.7650,Cluster-34894.82207,Cluster-24315.0,Cluster-34894.43346,Cluster-34894.75683,Cluster-34894.50833,Cluster-34894.17808,Cluster-34894.102709,Cluster-34894.41687,Cluster-34894.61974,Cluster-34894.74878,Clust…
GO:0007219	Notch signaling pathway	biological_process	0.65457	1	3	1654	95	49533	Cluster-34894.56367,Cluster-34894.78551,Cluster-34894.50596
GO:0042277	peptide binding	molecular_function	0.65516	1	1	1654	27	49533	Cluster-34894.99967
GO:0007006	mitochondrial membrane organization	biological_process	0.65655	1	1	1654	30	49533	Cluster-34894.22821
GO:0009538	photosystem I reaction center	cellular_component	0.6567	1	1	1654	35	49533	Cluster-34894.54754
GO:0004402	histone acetyltransferase activity	molecular_function	0.65687	1	2	1654	65	49533	Cluster-34894.101808,Cluster-34894.6976
GO:0005186	pheromone activity	molecular_function	0.65925	1	1	1654	36	49533	Cluster-34894.30338
GO:0015849	organic acid transport	biological_process	0.65983	1	8	1654	248	49533	Cluster-34894.19496,Cluster-34894.96289,Cluster-34894.8751,Cluster-34894.41713,Cluster-34894.47234,Cluster-34894.99500,Cluster-34894.15804,Cluster-34894.27174
GO:0046942	carboxylic acid transport	biological_process	0.65983	1	8	1654	248	49533	Cluster-34894.99500,Cluster-34894.47234,Cluster-34894.41713,Cluster-34894.8751,Cluster-34894.96289,Cluster-34894.19496,Cluster-34894.27174,Cluster-34894.15804
GO:0006750	glutathione biosynthetic process	biological_process	0.66258	1	1	1654	30	49533	Cluster-34894.22436
GO:0006733	oxidoreduction coenzyme metabolic process	biological_process	0.66308	1	12	1654	374	49533	Cluster-34894.61730,Cluster-34894.48364,Cluster-34894.86397,Cluster-12597.1,Cluster-34894.58364,Cluster-34894.54153,Cluster-34894.81829,Cluster-34894.61254,Cluster-29366.0,Cluster-34894.61252,Cluster-34894.21131,Cluster-34894.63117
GO:0016209	antioxidant activity	molecular_function	0.66329	1	4	1654	128	49533	Cluster-34894.83751,Cluster-25267.0,Cluster-34894.86389,Cluster-34894.75349
GO:0050661	NADP binding	molecular_function	0.66333	1	3	1654	96	49533	Cluster-34894.65259,Cluster-34894.81829,Cluster-34894.63117
GO:0008544	epidermis development	biological_process	0.66348	1	1	1654	28	49533	Cluster-34894.101011
GO:0019900	kinase binding	molecular_function	0.66418	1	4	1654	139	49533	Cluster-34894.95221,Cluster-34894.15715,Cluster-34894.79588,Cluster-34894.45300
GO:0051087	chaperone binding	molecular_function	0.66438	1	3	1654	102	49533	Cluster-34894.33109,Cluster-34894.16208,Cluster-34894.91000
GO:0004843	ubiquitin-specific protease activity	molecular_function	0.66473	1	1	1654	28	49533	Cluster-34894.72901
GO:0010506	regulation of autophagy	biological_process	0.66577	1	10	1654	328	49533	Cluster-14514.0,Cluster-34894.96049,Cluster-34894.12862,Cluster-34894.90034,Cluster-34894.69959,Cluster-34894.45300,Cluster-34894.46259,Cluster-34894.49717,Cluster-34894.63685,Cluster-34894.27174
GO:0050793	regulation of developmental process	biological_process	0.66587	1	5	1654	168	49533	Cluster-34894.21275,Cluster-34894.12862,Cluster-34894.59925,Cluster-34894.31620,Cluster-34894.60314
GO:0006614	SRP-dependent cotranslational protein targeting to membrane	biological_process	0.66599	1	3	1654	96	49533	Cluster-34894.32236,Cluster-34894.82207,Cluster-34894.52311
GO:0045047	protein targeting to ER	biological_process	0.66599	1	3	1654	96	49533	Cluster-34894.52311,Cluster-34894.82207,Cluster-34894.32236
GO:0072599	establishment of protein localization to endoplasmic reticulum	biological_process	0.66599	1	3	1654	96	49533	Cluster-34894.52311,Cluster-34894.82207,Cluster-34894.32236
GO:0033014	tetrapyrrole biosynthetic process	biological_process	0.66693	1	7	1654	221	49533	Cluster-34894.62299,Cluster-34894.61254,Cluster-34894.101694,Cluster-34894.92197,Cluster-34894.77308,Cluster-34894.82976,Cluster-34894.61252
GO:0070071	proton-transporting two-sector ATPase complex assembly	biological_process	0.66723	1	1	1654	33	49533	Cluster-34894.15804
GO:0034212	peptide N-acetyltransferase activity	molecular_function	0.66752	1	2	1654	66	49533	Cluster-34894.6976,Cluster-34894.101808
GO:0061733	peptide-lysine-N-acetyltransferase activity	molecular_function	0.66752	1	2	1654	66	49533	Cluster-34894.101808,Cluster-34894.6976
GO:0001897	cytolysis by symbiont of host cells	biological_process	0.66802	1	1	1654	32	49533	Cluster-34894.51841
GO:0019836	hemolysis by symbiont of host erythrocytes	biological_process	0.66802	1	1	1654	32	49533	Cluster-34894.51841
GO:0019829	cation-transporting ATPase activity	molecular_function	0.66842	1	3	1654	92	49533	Cluster-34894.22373,Cluster-34894.78905,Cluster-34894.7011
GO:0042625	ATPase activity, coupled to transmembrane movement of ions	molecular_function	0.66842	1	3	1654	92	49533	Cluster-34894.7011,Cluster-34894.22373,Cluster-34894.78905
GO:0008064	regulation of actin polymerization or depolymerization	biological_process	0.66864	1	2	1654	66	49533	Cluster-34894.77674,Cluster-34894.43248
GO:0008154	actin polymerization or depolymerization	biological_process	0.66864	1	2	1654	66	49533	Cluster-34894.77674,Cluster-34894.43248
GO:0030041	actin filament polymerization	biological_process	0.66864	1	2	1654	66	49533	Cluster-34894.77674,Cluster-34894.43248
GO:0030832	regulation of actin filament length	biological_process	0.66864	1	2	1654	66	49533	Cluster-34894.77674,Cluster-34894.43248
GO:0030833	regulation of actin filament polymerization	biological_process	0.66864	1	2	1654	66	49533	Cluster-34894.43248,Cluster-34894.77674
GO:0032535	regulation of cellular component size	biological_process	0.66864	1	2	1654	66	49533	Cluster-34894.43248,Cluster-34894.77674
GO:0032956	regulation of actin cytoskeleton organization	biological_process	0.66864	1	2	1654	66	49533	Cluster-34894.77674,Cluster-34894.43248
GO:0032970	regulation of actin filament-based process	biological_process	0.66864	1	2	1654	66	49533	Cluster-34894.43248,Cluster-34894.77674
GO:0044463	cell projection part	cellular_component	0.66932	1	2	1654	69	49533	Cluster-34894.46289,Cluster-34894.78240
GO:0004177	aminopeptidase activity	molecular_function	0.66933	1	2	1654	67	49533	Cluster-34894.14125,Cluster-34894.89318
GO:0008915	lipid-A-disaccharide synthase activity	molecular_function	0.66959	1	1	1654	32	49533	Cluster-34894.77888
GO:0010648	negative regulation of cell communication	biological_process	0.67011	1	1	1654	31	49533	Cluster-34894.13287
GO:0023057	negative regulation of signaling	biological_process	0.67011	1	1	1654	31	49533	Cluster-34894.13287
GO:0016836	hydro-lyase activity	molecular_function	0.67053	1	4	1654	133	49533	Cluster-34894.33912,Cluster-34894.42550,Cluster-34894.96637,Cluster-34894.96635
GO:0031167	rRNA methylation	biological_process	0.67058	1	1	1654	28	49533	Cluster-34894.41687
GO:0006525	arginine metabolic process	biological_process	0.67164	1	9	1654	303	49533	Cluster-34894.47056,Cluster-34894.59484,Cluster-34894.38742,Cluster-34894.51934,Cluster-34894.43602,Cluster-34894.37600,Cluster-34894.66806,Cluster-34894.59866,Cluster-34894.35111
GO:0006304	DNA modification	biological_process	0.67209	1	5	1654	162	49533	Cluster-34894.43319,Cluster-34894.15032,Cluster-34894.71563,Cluster-34894.74878,Cluster-34894.75683
GO:0001907	killing by symbiont of host cells	biological_process	0.67305	1	1	1654	33	49533	Cluster-34894.51841
GO:0044004	disruption by symbiont of host cell	biological_process	0.67305	1	1	1654	33	49533	Cluster-34894.51841
GO:0000794	condensed nuclear chromosome	cellular_component	0.67307	1	7	1654	234	49533	Cluster-34894.15714,Cluster-34894.35213,Cluster-34894.61660,Cluster-34894.58726,Cluster-34894.19751,Cluster-34894.72501,Cluster-34894.96657
GO:0009072	aromatic amino acid family metabolic process	biological_process	0.67311	1	14	1654	423	49533	Cluster-34894.14416,Cluster-34894.11396,Cluster-34894.73498,Cluster-34894.81972,Cluster-34894.42545,Cluster-34894.27841,Cluster-34894.61730,Cluster-34894.62878,Cluster-34894.61252,Cluster-34894.96635,Cluster-34894.63617,Cluster-34894.99221,Cluster-34894.61254,Cluster-34894.64976
GO:0032786	positive regulation of DNA-templated transcription, elongation	biological_process	0.67315	1	2	1654	65	49533	Cluster-34894.76815,Cluster-34894.24926
GO:0032968	positive regulation of transcription elongation from RNA polymerase II promoter	biological_process	0.67315	1	2	1654	65	49533	Cluster-34894.24926,Cluster-34894.76815
GO:0034243	regulation of transcription elongation from RNA polymerase II promoter	biological_process	0.67315	1	2	1654	65	49533	Cluster-34894.24926,Cluster-34894.76815
GO:0034622	cellular macromolecular complex assembly	biological_process	0.67322	1	31	1654	970	49533	Cluster-16853.1,Cluster-34894.38829,Cluster-34894.45995,Cluster-34894.19751,Cluster-34894.17019,Cluster-34894.15804,Cluster-34894.15898,Cluster-34894.12066,Cluster-34894.40744,Cluster-34894.77674,Cluster-34894.24264,Cluster-14514.0,Cluster-34894.70713,Cluster-34894.7841,Cluster-34894.60834,Cluster-34894.16182,Cluster-34894.99615,Cluster-34894.57196,Cluster-34894.60314,Cluster-34894.12466,Cluster-…
GO:0004523	RNA-DNA hybrid ribonuclease activity	molecular_function	0.67366	1	2	1654	63	49533	Cluster-34894.75683,Cluster-34894.82207
GO:0009225	nucleotide-sugar metabolic process	biological_process	0.67461	1	1	1654	36	49533	Cluster-32090.1
GO:0009512	cytochrome b6f complex	cellular_component	0.67595	1	2	1654	66	49533	Cluster-34894.77308,Cluster-34894.33977
GO:0051016	barbed-end actin filament capping	biological_process	0.67596	1	1	1654	32	49533	Cluster-34894.77674
GO:0000160	phosphorelay signal transduction system	biological_process	0.67621	1	3	1654	96	49533	Cluster-34345.0,Cluster-34894.79917,Cluster-34894.48260
GO:0030414	peptidase inhibitor activity	molecular_function	0.67679	1	10	1654	318	49533	Cluster-34894.55757,Cluster-17321.0,Cluster-34894.14957,Cluster-34894.20041,Cluster-16584.0,Cluster-34894.40228,Cluster-34894.53632,Cluster-34894.18176,Cluster-34894.55758,Cluster-31952.0
GO:0061134	peptidase regulator activity	molecular_function	0.67679	1	10	1654	318	49533	Cluster-34894.55758,Cluster-31952.0,Cluster-34894.18176,Cluster-34894.40228,Cluster-34894.53632,Cluster-34894.20041,Cluster-16584.0,Cluster-17321.0,Cluster-34894.14957,Cluster-34894.55757
GO:0018193	peptidyl-amino acid modification	biological_process	0.67681	1	6	1654	194	49533	Cluster-34894.62299,Cluster-34894.7650,Cluster-34894.7647,Cluster-34894.101808,Cluster-34894.63399,Cluster-34894.48561
GO:0015459	potassium channel regulator activity	molecular_function	0.67682	1	1	1654	33	49533	Cluster-34894.67139
GO:0019870	potassium channel inhibitor activity	molecular_function	0.67682	1	1	1654	33	49533	Cluster-34894.67139
GO:0051240	positive regulation of multicellular organismal process	biological_process	0.67694	1	2	1654	67	49533	Cluster-34894.53590,Cluster-7665.0
GO:0051252	regulation of RNA metabolic process	biological_process	0.67815	1	151	1654	4490	49533	Cluster-34894.31620,Cluster-34894.89700,Cluster-34894.51510,Cluster-34894.60304,Cluster-34894.56369,Cluster-34894.96657,Cluster-34894.71060,Cluster-34894.79362,Cluster-34894.21275,Cluster-34894.66808,Cluster-34894.45995,Cluster-34894.7650,Cluster-34894.27484,Cluster-34894.31740,Cluster-34894.35421,Cluster-34894.6976,Cluster-34894.101808,Cluster-26774.0,Cluster-34894.47768,Cluster-34894.102233,Clu…
GO:0019783	ubiquitin-like protein-specific protease activity	molecular_function	0.67851	1	2	1654	61	49533	Cluster-34894.61808,Cluster-34894.72901
GO:0002064	epithelial cell development	biological_process	0.6786	1	1	1654	34	49533	Cluster-34894.96944
GO:0002065	columnar/cuboidal epithelial cell differentiation	biological_process	0.6786	1	1	1654	34	49533	Cluster-34894.96944
GO:0002066	columnar/cuboidal epithelial cell development	biological_process	0.6786	1	1	1654	34	49533	Cluster-34894.96944
GO:0005213	structural constituent of chorion	molecular_function	0.6786	1	1	1654	34	49533	Cluster-34894.96944
GO:0007292	female gamete generation	biological_process	0.6786	1	1	1654	34	49533	Cluster-34894.96944
GO:0007304	chorion-containing eggshell formation	biological_process	0.6786	1	1	1654	34	49533	Cluster-34894.96944
GO:0030703	eggshell formation	biological_process	0.6786	1	1	1654	34	49533	Cluster-34894.96944
GO:0030707	ovarian follicle cell development	biological_process	0.6786	1	1	1654	34	49533	Cluster-34894.96944
GO:0048477	oogenesis	biological_process	0.6786	1	1	1654	34	49533	Cluster-34894.96944
GO:0072524	pyridine-containing compound metabolic process	biological_process	0.67939	1	7	1654	221	49533	Cluster-12597.1,Cluster-34894.61254,Cluster-34894.86397,Cluster-34894.61730,Cluster-34894.81829,Cluster-34894.61252,Cluster-34894.63117
GO:0019825	oxygen binding	molecular_function	0.68055	1	1	1654	34	49533	Cluster-34894.96740
GO:0009790	embryo development	biological_process	0.6816	1	2	1654	71	49533	Cluster-34894.60314,Cluster-34894.21275
GO:0000793	condensed chromosome	cellular_component	0.68212	1	9	1654	303	49533	Cluster-34894.16182,Cluster-34894.15714,Cluster-34894.96049,Cluster-34894.58726,Cluster-34894.35213,Cluster-34894.61660,Cluster-34894.96657,Cluster-34894.72501,Cluster-34894.19751
GO:0006325	chromatin organization	biological_process	0.68214	1	7	1654	225	49533	Cluster-16853.1,Cluster-34894.7650,Cluster-34894.101808,Cluster-34894.7647,Cluster-34894.63399,Cluster-34894.48561,Cluster-34894.72119
GO:0042765	GPI-anchor transamidase complex	cellular_component	0.68337	1	1	1654	30	49533	Cluster-34894.57202
GO:0005200	structural constituent of cytoskeleton	molecular_function	0.68373	1	2	1654	69	49533	Cluster-34894.8057,Cluster-34894.8591
GO:0010340	carboxyl-O-methyltransferase activity	molecular_function	0.68389	1	2	1654	58	49533	Cluster-34894.61974,Cluster-34894.41191
GO:0051998	protein carboxyl O-methyltransferase activity	molecular_function	0.68389	1	2	1654	58	49533	Cluster-34894.61974,Cluster-34894.41191
GO:0008053	mitochondrial fusion	biological_process	0.68621	1	3	1654	111	49533	Cluster-34894.69959,Cluster-34894.99970,Cluster-34894.95221
GO:0005044	scavenger receptor activity	molecular_function	0.68637	1	3	1654	104	49533	Cluster-34894.94634,Cluster-34894.104525,Cluster-34894.36758
GO:0038024	cargo receptor activity	molecular_function	0.68637	1	3	1654	104	49533	Cluster-34894.94634,Cluster-34894.104525,Cluster-34894.36758
GO:0000902	cell morphogenesis	biological_process	0.68675	1	9	1654	290	49533	Cluster-34894.62000,Cluster-34894.64754,Cluster-34894.35044,Cluster-34894.12862,Cluster-34894.62381,Cluster-34894.45004,Cluster-34894.59925,Cluster-37016.0,Cluster-34894.33109
GO:0032989	cellular component morphogenesis	biological_process	0.68675	1	9	1654	290	49533	Cluster-34894.62000,Cluster-34894.35044,Cluster-34894.62381,Cluster-34894.12862,Cluster-34894.64754,Cluster-34894.45004,Cluster-34894.33109,Cluster-37016.0,Cluster-34894.59925
GO:0007017	microtubule-based process	biological_process	0.68711	1	18	1654	582	49533	Cluster-34894.12466,Cluster-34894.15710,Cluster-34894.66718,Cluster-34894.99254,Cluster-34894.14312,Cluster-34894.78905,Cluster-34894.79588,Cluster-34894.78560,Cluster-34894.105470,Cluster-34894.96049,Cluster-34894.78551,Cluster-34894.78553,Cluster-34894.21651,Cluster-34894.19751,Cluster-34894.17296,Cluster-34894.64041,Cluster-34894.79586,Cluster-34894.16182
GO:0043603	cellular amide metabolic process	biological_process	0.68834	1	60	1654	1863	49533	Cluster-34894.19990,Cluster-34894.14311,Cluster-34894.18092,Cluster-34894.52963,Cluster-34894.53349,Cluster-34894.51934,Cluster-34894.63209,Cluster-34894.8401,Cluster-34894.31170,Cluster-34894.46661,Cluster-34894.58719,Cluster-34894.95221,Cluster-8208.0,Cluster-34894.8057,Cluster-34894.2329,Cluster-16718.0,Cluster-34894.18447,Cluster-34894.15032,Cluster-34894.17406,Cluster-34894.18076,Cluster-348…
GO:0016311	dephosphorylation	biological_process	0.68866	1	10	1654	305	49533	Cluster-34894.99221,Cluster-34894.64976,Cluster-34894.11548,Cluster-34894.57084,Cluster-34894.57083,Cluster-34894.54542,Cluster-34894.62878,Cluster-34894.49745,Cluster-34894.11396,Cluster-34894.73498
GO:0019207	kinase regulator activity	molecular_function	0.68884	1	4	1654	132	49533	Cluster-34894.79917,Cluster-34894.70046,Cluster-25895.1,Cluster-34894.65876
GO:0009312	oligosaccharide biosynthetic process	biological_process	0.68938	1	2	1654	66	49533	Cluster-34894.52934,Cluster-34894.77888
GO:0048038	quinone binding	molecular_function	0.69027	1	1	1654	33	49533	Cluster-36750.0
GO:0016597	amino acid binding	molecular_function	0.69252	1	1	1654	35	49533	Cluster-34894.11416
GO:0005791	rough endoplasmic reticulum	cellular_component	0.69333	1	2	1654	71	49533	Cluster-34894.64310,Cluster-34894.102323
GO:0030867	rough endoplasmic reticulum membrane	cellular_component	0.69333	1	2	1654	71	49533	Cluster-34894.64310,Cluster-34894.102323
GO:0005184	neuropeptide hormone activity	molecular_function	0.6936	1	2	1654	70	49533	Cluster-34894.99031,Cluster-34894.100382
GO:0043531	ADP binding	molecular_function	0.69365	1	2	1654	68	49533	Cluster-34894.104592,Cluster-34894.32236
GO:0005657	replication fork	cellular_component	0.69407	1	9	1654	281	49533	Cluster-34894.64310,Cluster-34894.83148,Cluster-34894.107068,Cluster-34894.44517,Cluster-34894.40392,Cluster-34894.63014,Cluster-34894.96812,Cluster-26628.0,Cluster-34894.95237
GO:0008083	growth factor activity	molecular_function	0.69408	1	7	1654	230	49533	Cluster-34894.96476,Cluster-34894.27736,Cluster-30471.0,Cluster-34894.72213,Cluster-34894.69855,Cluster-34894.41420,Cluster-34894.99967
GO:0009878	nodule morphogenesis	biological_process	0.6969	1	2	1654	68	49533	Cluster-34894.61974,Cluster-34894.47755
GO:0009886	post-embryonic morphogenesis	biological_process	0.6969	1	2	1654	68	49533	Cluster-34894.61974,Cluster-34894.47755
GO:0044111	development involved in symbiotic interaction	biological_process	0.6969	1	2	1654	68	49533	Cluster-34894.47755,Cluster-34894.61974
GO:0000981	RNA polymerase II transcription factor activity, sequence-specific DNA binding	molecular_function	0.69708	1	1	1654	31	49533	Cluster-34894.12685
GO:0002831	regulation of response to biotic stimulus	biological_process	0.69755	1	1	1654	32	49533	Cluster-18299.0
GO:0006743	ubiquinone metabolic process	biological_process	0.69868	1	5	1654	170	49533	Cluster-29366.0,Cluster-34894.54153,Cluster-34894.21131,Cluster-34894.48364,Cluster-34894.58364
GO:0006744	ubiquinone biosynthetic process	biological_process	0.69868	1	5	1654	170	49533	Cluster-29366.0,Cluster-34894.54153,Cluster-34894.21131,Cluster-34894.48364,Cluster-34894.58364
GO:0098798	mitochondrial protein complex	cellular_component	0.69883	1	13	1654	435	49533	Cluster-34894.86738,Cluster-34894.15804,Cluster-34894.83060,Cluster-34894.29411,Cluster-34894.33968,Cluster-34894.29410,Cluster-34894.97958,Cluster-16764.0,Cluster-34894.22821,Cluster-34894.26738,Cluster-34894.70529,Cluster-34894.86389,Cluster-34894.15621
GO:0043934	sporulation	biological_process	0.69889	1	2	1654	68	49533	Cluster-24797.8,Cluster-34894.31620
GO:0072594	establishment of protein localization to organelle	biological_process	0.69923	1	17	1654	555	49533	Cluster-34894.52311,Cluster-34894.10023,Cluster-34894.29411,Cluster-34894.29410,Cluster-34894.14832,Cluster-34894.15714,Cluster-34894.96049,Cluster-34894.21651,Cluster-34894.72073,Cluster-34894.15621,Cluster-34894.95221,Cluster-34894.69959,Cluster-34894.82207,Cluster-34894.16182,Cluster-34894.68407,Cluster-34894.32236,Cluster-34894.26884
GO:0000152	nuclear ubiquitin ligase complex	cellular_component	0.69956	1	7	1654	223	49533	Cluster-34894.1073,Cluster-26774.0,Cluster-25895.1,Cluster-34894.61859,Cluster-34894.71563,Cluster-25895.0,Cluster-34894.40384
GO:0005680	anaphase-promoting complex	cellular_component	0.69956	1	7	1654	223	49533	Cluster-25895.1,Cluster-26774.0,Cluster-34894.1073,Cluster-25895.0,Cluster-34894.40384,Cluster-34894.71563,Cluster-34894.61859
GO:0031461	cullin-RING ubiquitin ligase complex	cellular_component	0.69956	1	7	1654	223	49533	Cluster-34894.61859,Cluster-34894.71563,Cluster-34894.40384,Cluster-25895.0,Cluster-34894.1073,Cluster-26774.0,Cluster-25895.1
GO:0055076	transition metal ion homeostasis	biological_process	0.69983	1	1	1654	35	49533	Cluster-34894.60555
GO:1901698	response to nitrogen compound	biological_process	0.70058	1	1	1654	36	49533	Cluster-34894.59585
GO:0044455	mitochondrial membrane part	cellular_component	0.70062	1	14	1654	466	49533	Cluster-34894.77939,Cluster-34894.86389,Cluster-34894.15621,Cluster-34894.26738,Cluster-34894.70529,Cluster-34894.97958,Cluster-16764.0,Cluster-34894.22821,Cluster-34894.15804,Cluster-34894.86738,Cluster-34894.83060,Cluster-34894.29411,Cluster-34894.33968,Cluster-34894.29410
GO:0009288	bacterial-type flagellum	cellular_component	0.701	1	5	1654	174	49533	Cluster-14514.0,Cluster-34894.46289,Cluster-34894.78240,Cluster-34894.96049,Cluster-34894.67786
GO:0071973	bacterial-type flagellum-dependent cell motility	biological_process	0.70205	1	3	1654	107	49533	Cluster-14514.0,Cluster-34894.70207,Cluster-34894.96049
GO:0065009	regulation of molecular function	biological_process	0.70246	1	25	1654	760	49533	Cluster-34894.81525,Cluster-34894.70840,Cluster-34894.45734,Cluster-34894.88440,Cluster-34894.5263,Cluster-34894.61329,Cluster-25895.1,Cluster-34894.70046,Cluster-13907.0,Cluster-34894.9314,Cluster-34894.96661,Cluster-34894.81524,Cluster-34894.15299,Cluster-34894.78657,Cluster-34894.63056,Cluster-34894.51255,Cluster-34894.97991,Cluster-34894.58724,Cluster-34894.73279,Cluster-34894.109762,Cluster-…
GO:0051050	positive regulation of transport	biological_process	0.70274	1	1	1654	34	49533	Cluster-34894.33039
GO:0033013	tetrapyrrole metabolic process	biological_process	0.70315	1	8	1654	256	49533	Cluster-34894.61252,Cluster-34894.77308,Cluster-34894.61254,Cluster-34894.62299,Cluster-34894.101694,Cluster-34894.92197,Cluster-34894.82976,Cluster-34894.109736
GO:0046500	S-adenosylmethionine metabolic process	biological_process	0.70347	1	2	1654	61	49533	Cluster-34894.29157,Cluster-34894.41191
GO:0006020	inositol metabolic process	biological_process	0.70535	1	1	1654	35	49533	Cluster-12597.1
GO:0030313	cell envelope	cellular_component	0.70544	1	2	1654	74	49533	Cluster-34894.36640,Cluster-34894.46661
GO:0051128	regulation of cellular component organization	biological_process	0.70648	1	15	1654	483	49533	Cluster-36750.0,Cluster-34894.16182,Cluster-34894.14125,Cluster-34894.96049,Cluster-34894.12862,Cluster-34894.57548,Cluster-34894.60277,Cluster-34894.66229,Cluster-34894.36683,Cluster-34894.43248,Cluster-34894.77674,Cluster-34894.59925,Cluster-34894.89318,Cluster-34894.12466,Cluster-34894.19751
GO:0000276	mitochondrial proton-transporting ATP synthase complex, coupling factor F(o)	cellular_component	0.70772	1	4	1654	150	49533	Cluster-16764.0,Cluster-34894.97958,Cluster-34894.33968,Cluster-34894.15804
GO:0035091	phosphatidylinositol binding	molecular_function	0.70779	1	4	1654	126	49533	Cluster-34894.14495,Cluster-34894.73942,Cluster-34894.33039,Cluster-34894.12139
GO:0008654	phospholipid biosynthetic process	biological_process	0.70783	1	6	1654	194	49533	Cluster-34894.84881,Cluster-34894.83331,Cluster-34894.83329,Cluster-36520.1,Cluster-34894.77888,Cluster-34894.84875
GO:0016820	hydrolase activity, acting on acid anhydrides, catalyzing transmembrane movement of substances	molecular_function	0.70804	1	11	1654	343	49533	Cluster-34894.72073,Cluster-34894.36935,Cluster-34894.22373,Cluster-34894.78905,Cluster-34894.67261,Cluster-34894.108385,Cluster-34894.7011,Cluster-34894.48742,Cluster-34894.40744,Cluster-34894.59866,Cluster-34894.15898
GO:0031411	gas vesicle	cellular_component	0.70809	1	1	1654	36	49533	Cluster-34894.23214
GO:0022412	cellular process involved in reproduction in multicellular organism	biological_process	0.70854	1	2	1654	75	49533	Cluster-34894.96944,Cluster-34894.82431
GO:0006821	chloride transport	biological_process	0.7088	1	1	1654	34	49533	Cluster-34894.13522
GO:0009147	pyrimidine nucleoside triphosphate metabolic process	biological_process	0.70901	1	1	1654	33	49533	Cluster-34894.102709
GO:0006351	transcription, DNA-templated	biological_process	0.7104	1	171	1654	5160	49533	Cluster-34894.78962,Cluster-34894.82747,Cluster-34894.11547,Cluster-34894.61778,Cluster-34894.62093,Cluster-34894.95357,Cluster-34894.69437,Cluster-34894.11711,Cluster-34894.80756,Cluster-34894.63014,Cluster-34894.32665,Cluster-34894.6241,Cluster-34894.54456,Cluster-34894.81610,Cluster-34894.16662,Cluster-34894.10023,Cluster-34894.45300,Cluster-34894.15292,Cluster-34894.84520,Cluster-16758.1,Clus…
GO:0097659	nucleic acid-templated transcription	biological_process	0.7104	1	171	1654	5160	49533	Cluster-34894.36187,Cluster-34894.45995,Cluster-34894.66808,Cluster-34894.7650,Cluster-34894.27484,Cluster-34894.89700,Cluster-34894.31620,Cluster-34894.51510,Cluster-34894.96657,Cluster-34894.71060,Cluster-34894.60304,Cluster-34894.56369,Cluster-34894.21275,Cluster-34894.79362,Cluster-34894.99968,Cluster-8832.1,Cluster-34894.37824,Cluster-34894.55720,Cluster-34894.36935,Cluster-34894.13664,Clust…
GO:0003950	NAD+ ADP-ribosyltransferase activity	molecular_function	0.71067	1	3	1654	99	49533	Cluster-34894.48723,Cluster-34894.84230,Cluster-34894.53997
GO:0042651	thylakoid membrane	cellular_component	0.71139	1	2	1654	73	49533	Cluster-34894.87268,Cluster-34894.81166
GO:0007600	sensory perception	biological_process	0.71268	1	4	1654	144	49533	Cluster-34894.55304,Cluster-34894.9940,Cluster-34894.29377,Cluster-34894.104654
GO:0050877	neurological system process	biological_process	0.71268	1	4	1654	144	49533	Cluster-34894.29377,Cluster-34894.9940,Cluster-34894.55304,Cluster-34894.104654
GO:1990267	response to transition metal nanoparticle	biological_process	0.71338	1	1	1654	38	49533	Cluster-34894.64699
GO:0001539	cilium or flagellum-dependent cell motility	biological_process	0.71375	1	3	1654	109	49533	Cluster-14514.0,Cluster-34894.70207,Cluster-34894.96049
GO:0097588	archaeal or bacterial-type flagellum-dependent cell motility	biological_process	0.71375	1	3	1654	109	49533	Cluster-34894.96049,Cluster-34894.70207,Cluster-14514.0
GO:0044782	cilium organization	biological_process	0.7144	1	1	1654	37	49533	Cluster-34894.33109
GO:0009791	post-embryonic development	biological_process	0.71456	1	2	1654	72	49533	Cluster-34894.47755,Cluster-34894.61974
GO:0015948	methanogenesis	biological_process	0.71514	1	2	1654	72	49533	Cluster-34894.95221,Cluster-34894.26612
GO:0015975	energy derivation by oxidation of reduced inorganic compounds	biological_process	0.71514	1	2	1654	72	49533	Cluster-34894.26612,Cluster-34894.95221
GO:0043447	alkane biosynthetic process	biological_process	0.71514	1	2	1654	72	49533	Cluster-34894.26612,Cluster-34894.95221
GO:0044087	regulation of cellular component biogenesis	biological_process	0.71527	1	3	1654	101	49533	Cluster-34894.43248,Cluster-34894.12466,Cluster-34894.77674
GO:0007268	synaptic transmission	biological_process	0.71552	1	3	1654	106	49533	Cluster-34894.40735,Cluster-34894.29409,Cluster-34894.33039
GO:0005086	ARF guanyl-nucleotide exchange factor activity	molecular_function	0.7156	1	1	1654	33	49533	Cluster-34894.96661
GO:0032011	ARF protein signal transduction	biological_process	0.7156	1	1	1654	33	49533	Cluster-34894.96661
GO:0032012	regulation of ARF protein signal transduction	biological_process	0.7156	1	1	1654	33	49533	Cluster-34894.96661
GO:0032940	secretion by cell	biological_process	0.71576	1	8	1654	269	49533	Cluster-34894.82431,Cluster-34894.96049,Cluster-34894.41362,Cluster-33544.0,Cluster-34894.16252,Cluster-34894.10964,Cluster-34894.56107,Cluster-34894.41361
GO:0007218	neuropeptide signaling pathway	biological_process	0.71596	1	4	1654	139	49533	Cluster-18868.0,Cluster-34894.100382,Cluster-34894.99031,Cluster-14781.0
GO:0019220	regulation of phosphate metabolic process	biological_process	0.71647	1	5	1654	165	49533	Cluster-25895.1,Cluster-34894.65876,Cluster-34894.70046,Cluster-34894.54542,Cluster-34894.49745
GO:0051174	regulation of phosphorus metabolic process	biological_process	0.71647	1	5	1654	165	49533	Cluster-34894.49745,Cluster-34894.54542,Cluster-34894.70046,Cluster-34894.65876,Cluster-25895.1
GO:1902911	protein kinase complex	cellular_component	0.71671	1	5	1654	166	49533	Cluster-34345.0,Cluster-34894.79917,Cluster-34894.97108,Cluster-34894.48260,Cluster-34894.8057
GO:0016887	ATPase activity	molecular_function	0.71694	1	31	1654	938	49533	Cluster-34894.59866,Cluster-34894.15651,Cluster-34894.104310,Cluster-34894.47238,Cluster-34894.81176,Cluster-34894.82207,Cluster-34894.7700,Cluster-34894.104516,Cluster-34894.83148,Cluster-34894.7011,Cluster-34894.48742,Cluster-34894.45539,Cluster-34894.108385,Cluster-34894.22373,Cluster-34894.32236,Cluster-34894.54433,Cluster-34894.67261,Cluster-34894.84961,Cluster-34894.83063,Cluster-34894.5778…
GO:0030855	epithelial cell differentiation	biological_process	0.71758	1	1	1654	37	49533	Cluster-34894.96944
GO:0005996	monosaccharide metabolic process	biological_process	0.71771	1	10	1654	336	49533	Cluster-34894.81829,Cluster-34894.86397,Cluster-12597.1,Cluster-32090.1,Cluster-34894.52311,Cluster-34894.15240,Cluster-34894.41391,Cluster-34894.97051,Cluster-34894.67287,Cluster-34894.14094
GO:0051861	glycolipid binding	molecular_function	0.71812	1	1	1654	35	49533	Cluster-34894.33039
GO:0016272	prefoldin complex	cellular_component	0.71877	1	3	1654	115	49533	Cluster-34894.99968,Cluster-34894.16182,Cluster-34894.22821
GO:0004565	beta-galactosidase activity	molecular_function	0.7193	1	1	1654	38	49533	Cluster-34894.14094
GO:0009341	beta-galactosidase complex	cellular_component	0.7193	1	1	1654	38	49533	Cluster-34894.14094
GO:0070603	SWI/SNF superfamily-type complex	cellular_component	0.7195	1	1	1654	39	49533	Cluster-34894.76815
GO:0006865	amino acid transport	biological_process	0.71951	1	3	1654	100	49533	Cluster-34894.47234,Cluster-34894.8751,Cluster-34894.96289
GO:0065008	regulation of biological quality	biological_process	0.72037	1	46	1654	1431	49533	Cluster-34894.99686,Cluster-34894.12862,Cluster-34894.22770,Cluster-34894.43248,Cluster-34894.59783,Cluster-34894.61733,Cluster-10748.0,Cluster-34894.109762,Cluster-34894.21275,Cluster-34894.8481,Cluster-34894.90646,Cluster-34894.60834,Cluster-34894.65039,Cluster-34894.16182,Cluster-34894.60081,Cluster-14514.0,Cluster-34894.8480,Cluster-34894.61954,Cluster-34894.8591,Cluster-34894.53590,Cluster-3…
GO:0005667	transcription factor complex	cellular_component	0.72122	1	78	1654	2358	49533	Cluster-34894.13548,Cluster-34894.25747,Cluster-34894.81977,Cluster-34894.97722,Cluster-34894.79586,Cluster-34894.96585,Cluster-34894.99967,Cluster-34894.43825,Cluster-34894.7700,Cluster-34894.107068,Cluster-34894.48218,Cluster-34894.69758,Cluster-34894.1162,Cluster-34894.14337,Cluster-34894.26752,Cluster-34894.53033,Cluster-34894.50596,Cluster-34894.59925,Cluster-34894.96811,Cluster-34894.20696,…
GO:0048519	negative regulation of biological process	biological_process	0.72159	1	18	1654	580	49533	Cluster-34894.60277,Cluster-34894.13287,Cluster-34894.71563,Cluster-34894.43248,Cluster-34894.78867,Cluster-34894.51255,Cluster-34894.81610,Cluster-34894.101011,Cluster-34894.65876,Cluster-34894.6241,Cluster-34894.8282,Cluster-34894.70840,Cluster-34894.98656,Cluster-34894.13664,Cluster-34894.77674,Cluster-19183.0,Cluster-34894.17604,Cluster-34894.2329
GO:0005801	cis-Golgi network	cellular_component	0.72159	1	3	1654	116	49533	Cluster-34894.69959,Cluster-34894.96049,Cluster-34894.16182
GO:0031647	regulation of protein stability	biological_process	0.72359	1	1	1654	35	49533	Cluster-10748.0
GO:0050821	protein stabilization	biological_process	0.72359	1	1	1654	35	49533	Cluster-10748.0
GO:0016868	intramolecular transferase activity, phosphotransferases	molecular_function	0.72483	1	1	1654	36	49533	Cluster-34894.92828
GO:0009245	lipid A biosynthetic process	biological_process	0.72676	1	1	1654	39	49533	Cluster-34894.77888
GO:0046493	lipid A metabolic process	biological_process	0.72676	1	1	1654	39	49533	Cluster-34894.77888
GO:1901269	lipooligosaccharide metabolic process	biological_process	0.72676	1	1	1654	39	49533	Cluster-34894.77888
GO:1901271	lipooligosaccharide biosynthetic process	biological_process	0.72676	1	1	1654	39	49533	Cluster-34894.77888
GO:0009279	cell outer membrane	cellular_component	0.72793	1	1	1654	39	49533	Cluster-34894.36640
GO:0070972	protein localization to endoplasmic reticulum	biological_process	0.72861	1	3	1654	105	49533	Cluster-34894.82207,Cluster-34894.32236,Cluster-34894.52311
GO:0060590	ATPase regulator activity	molecular_function	0.72962	1	5	1654	185	49533	Cluster-34894.91000,Cluster-34894.16208,Cluster-34894.41601,Cluster-34894.33109,Cluster-34894.51255
GO:0007617	mating behavior	biological_process	0.73064	1	1	1654	38	49533	Cluster-34894.52779
GO:0019098	reproductive behavior	biological_process	0.73064	1	1	1654	38	49533	Cluster-34894.52779
GO:0044705	multi-organism reproductive behavior	biological_process	0.73064	1	1	1654	38	49533	Cluster-34894.52779
GO:0015740	C4-dicarboxylate transport	biological_process	0.73128	1	2	1654	76	49533	Cluster-34894.19496,Cluster-34894.41713
GO:0008080	N-acetyltransferase activity	molecular_function	0.73158	1	4	1654	137	49533	Cluster-34894.101808,Cluster-34894.6976,Cluster-34894.54152,Cluster-34894.80873
GO:0004535	poly(A)-specific ribonuclease activity	molecular_function	0.73171	1	1	1654	33	49533	Cluster-34894.26738
GO:0009101	glycoprotein biosynthetic process	biological_process	0.73182	1	8	1654	268	49533	Cluster-34894.29152,Cluster-34894.13456,Cluster-34894.28196,Cluster-34894.24533,Cluster-34894.24538,Cluster-34894.1649,Cluster-34894.84053,Cluster-34894.13455
GO:0031984	organelle subcompartment	cellular_component	0.73214	1	2	1654	74	49533	Cluster-34894.49352,Cluster-34894.52934
GO:0098791	Golgi subcompartment	cellular_component	0.73214	1	2	1654	74	49533	Cluster-34894.49352,Cluster-34894.52934
GO:0016757	transferase activity, transferring glycosyl groups	molecular_function	0.73221	1	27	1654	854	49533	Cluster-34894.84230,Cluster-34894.52934,Cluster-34894.15556,Cluster-34894.49352,Cluster-34894.84053,Cluster-34894.83423,Cluster-34894.1649,Cluster-34894.24253,Cluster-35241.0,Cluster-34894.28196,Cluster-34894.6548,Cluster-34894.49997,Cluster-34894.13455,Cluster-34894.82431,Cluster-34894.48723,Cluster-34894.53997,Cluster-34894.24533,Cluster-34894.24538,Cluster-34894.10499,Cluster-34894.77888,Clust…
GO:0004198	calcium-dependent cysteine-type endopeptidase activity	molecular_function	0.73343	1	1	1654	40	49533	Cluster-34894.12629
GO:0008199	ferric iron binding	molecular_function	0.7335	1	1	1654	39	49533	Cluster-34894.65425
GO:0019219	regulation of nucleobase-containing compound metabolic process	biological_process	0.73386	1	151	1654	4546	49533	Cluster-34894.76815,Cluster-34894.24883,Cluster-34894.51890,Cluster-34894.60505,Cluster-34894.25450,Cluster-34894.38003,Cluster-34894.15653,Cluster-34894.58131,Cluster-34894.68367,Cluster-34894.12685,Cluster-34894.46151,Cluster-34894.71134,Cluster-34894.38305,Cluster-34894.16182,Cluster-34894.52963,Cluster-34894.52725,Cluster-34894.25247,Cluster-34894.66305,Cluster-34894.97620,Cluster-34894.68407…
GO:0032879	regulation of localization	biological_process	0.73393	1	5	1654	181	49533	Cluster-34894.33039,Cluster-34894.53590,Cluster-34894.21275,Cluster-7665.0,Cluster-34894.60314
GO:0005158	insulin receptor binding	molecular_function	0.73405	1	1	1654	33	49533	Cluster-34894.8057
GO:0005899	insulin receptor complex	cellular_component	0.73405	1	1	1654	33	49533	Cluster-34894.8057
GO:0060255	regulation of macromolecule metabolic process	biological_process	0.73415	1	170	1654	5109	49533	Cluster-34894.81977,Cluster-34894.28931,Cluster-34894.97614,Cluster-34894.48218,Cluster-34894.69758,Cluster-34894.43825,Cluster-19183.0,Cluster-16764.0,Cluster-34894.99967,Cluster-34894.96585,Cluster-34894.26738,Cluster-34894.8569,Cluster-34894.9691,Cluster-34894.38628,Cluster-34894.1162,Cluster-34894.15710,Cluster-34894.55639,Cluster-34894.93780,Cluster-34894.58638,Cluster-34894.93414,Cluster-34…
GO:0016741	transferase activity, transferring one-carbon groups	molecular_function	0.73474	1	24	1654	765	49533	Cluster-34894.99221,Cluster-34894.10620,Cluster-34894.99970,Cluster-34894.8401,Cluster-34894.7647,Cluster-34894.41191,Cluster-34894.42954,Cluster-34894.63014,Cluster-34894.95221,Cluster-34894.7650,Cluster-24315.0,Cluster-34894.82207,Cluster-34894.43346,Cluster-34894.75683,Cluster-34894.50833,Cluster-34894.17808,Cluster-34894.102709,Cluster-34894.41687,Cluster-34894.61974,Cluster-34894.74878,Clust…
GO:0016226	iron-sulfur cluster assembly	biological_process	0.73606	1	1	1654	37	49533	Cluster-34894.27174
GO:0031163	metallo-sulfur cluster assembly	biological_process	0.73606	1	1	1654	37	49533	Cluster-34894.27174
GO:0005890	sodium:potassium-exchanging ATPase complex	cellular_component	0.73633	1	1	1654	35	49533	Cluster-34894.55456
GO:0009061	anaerobic respiration	biological_process	0.73876	1	2	1654	76	49533	Cluster-34894.95221,Cluster-34894.26612
GO:0008982	protein-N(PI)-phosphohistidine-sugar phosphotransferase activity	molecular_function	0.73895	1	1	1654	42	49533	Cluster-34894.69101
GO:0009357	protein-N(PI)-phosphohistidine-sugar phosphotransferase complex	cellular_component	0.73895	1	1	1654	42	49533	Cluster-34894.69101
GO:0022414	reproductive process	biological_process	0.73934	1	9	1654	314	49533	Cluster-34894.52779,Cluster-34894.87626,Cluster-34894.69077,Cluster-34894.96944,Cluster-34894.70309,Cluster-34894.51934,Cluster-34894.82431,Cluster-34894.25747,Cluster-34894.35116
GO:0005975	carbohydrate metabolic process	biological_process	0.73959	1	50	1654	1572	49533	Cluster-34894.61254,Cluster-34894.67287,Cluster-34894.41391,Cluster-34894.91124,Cluster-34894.91749,Cluster-34894.98053,Cluster-34894.61252,Cluster-34894.77888,Cluster-34894.24538,Cluster-34894.32862,Cluster-34894.56121,Cluster-34894.50285,Cluster-34894.71967,Cluster-12597.1,Cluster-37016.0,Cluster-32090.1,Cluster-34894.56122,Cluster-34894.28196,Cluster-34894.50907,Cluster-34894.13455,Cluster-348…
GO:1901661	quinone metabolic process	biological_process	0.73992	1	5	1654	180	49533	Cluster-34894.21131,Cluster-34894.54153,Cluster-29366.0,Cluster-34894.48364,Cluster-34894.58364
GO:1901663	quinone biosynthetic process	biological_process	0.73992	1	5	1654	180	49533	Cluster-34894.48364,Cluster-34894.58364,Cluster-29366.0,Cluster-34894.54153,Cluster-34894.21131
GO:0006560	proline metabolic process	biological_process	0.73999	1	8	1654	288	49533	Cluster-34894.43602,Cluster-34894.37600,Cluster-34894.66806,Cluster-34894.59866,Cluster-34894.35111,Cluster-34894.47056,Cluster-34894.38742,Cluster-34894.51934
GO:0044801	single-organism membrane fusion	biological_process	0.74098	1	4	1654	156	49533	Cluster-34894.69959,Cluster-34894.95221,Cluster-34894.82431,Cluster-34894.99970
GO:0045735	nutrient reservoir activity	molecular_function	0.74408	1	1	1654	36	49533	Cluster-34894.29377
GO:0009100	glycoprotein metabolic process	biological_process	0.74434	1	8	1654	272	49533	Cluster-34894.13456,Cluster-34894.28196,Cluster-34894.29152,Cluster-34894.24538,Cluster-34894.1649,Cluster-34894.24533,Cluster-34894.84053,Cluster-34894.13455
GO:0007267	cell-cell signaling	biological_process	0.74477	1	3	1654	110	49533	Cluster-34894.33039,Cluster-34894.29409,Cluster-34894.40735
GO:0006403	RNA localization	biological_process	0.7454	1	6	1654	214	49533	Cluster-16758.1,Cluster-34894.91000,Cluster-34894.50527,Cluster-34894.80202,Cluster-34894.69437,Cluster-34894.75421
GO:0050657	nucleic acid transport	biological_process	0.7454	1	6	1654	214	49533	Cluster-34894.91000,Cluster-16758.1,Cluster-34894.80202,Cluster-34894.50527,Cluster-34894.75421,Cluster-34894.69437
GO:0050658	RNA transport	biological_process	0.7454	1	6	1654	214	49533	Cluster-16758.1,Cluster-34894.91000,Cluster-34894.50527,Cluster-34894.80202,Cluster-34894.69437,Cluster-34894.75421
GO:0051236	establishment of RNA localization	biological_process	0.7454	1	6	1654	214	49533	Cluster-16758.1,Cluster-34894.91000,Cluster-34894.80202,Cluster-34894.50527,Cluster-34894.69437,Cluster-34894.75421
GO:0019068	virion assembly	biological_process	0.74581	1	5	1654	180	49533	Cluster-34894.79692,Cluster-34894.46259,Cluster-34894.45300,Cluster-34894.38626,Cluster-34894.13549
GO:0007169	transmembrane receptor protein tyrosine kinase signaling pathway	biological_process	0.74591	1	2	1654	79	49533	Cluster-34894.77939,Cluster-34894.78970
GO:0006486	protein glycosylation	biological_process	0.7461	1	7	1654	242	49533	Cluster-34894.13455,Cluster-34894.24538,Cluster-34894.24533,Cluster-34894.28196,Cluster-34894.13456,Cluster-34894.84053,Cluster-34894.29152
GO:0043413	macromolecule glycosylation	biological_process	0.7461	1	7	1654	242	49533	Cluster-34894.13455,Cluster-34894.24533,Cluster-34894.24538,Cluster-34894.13456,Cluster-34894.28196,Cluster-34894.29152,Cluster-34894.84053
GO:0046914	transition metal ion binding	molecular_function	0.74641	1	155	1654	4732	49533	Cluster-25895.1,Cluster-34894.8460,Cluster-34894.41361,Cluster-34894.99200,Cluster-34894.82747,Cluster-34894.65517,Cluster-34894.62363,Cluster-34894.52376,Cluster-34894.103973,Cluster-34894.51663,Cluster-34894.11566,Cluster-34894.16662,Cluster-34894.10023,Cluster-34894.44917,Cluster-18751.1,Cluster-34894.33109,Cluster-34894.96484,Cluster-34894.40392,Cluster-34894.99559,Cluster-34894.101572,Cluste…
GO:0046903	secretion	biological_process	0.74651	1	8	1654	276	49533	Cluster-34894.96049,Cluster-34894.82431,Cluster-34894.10964,Cluster-34894.56107,Cluster-34894.41361,Cluster-33544.0,Cluster-34894.16252,Cluster-34894.41362
GO:0000313	organellar ribosome	cellular_component	0.74666	1	1	1654	39	49533	Cluster-34894.37401
GO:0005761	mitochondrial ribosome	cellular_component	0.74666	1	1	1654	39	49533	Cluster-34894.37401
GO:0005942	phosphatidylinositol 3-kinase complex	cellular_component	0.74715	1	1	1654	43	49533	Cluster-34894.79917
GO:0005944	phosphatidylinositol 3-kinase complex, class IB	cellular_component	0.74715	1	1	1654	43	49533	Cluster-34894.79917
GO:0035014	phosphatidylinositol 3-kinase regulator activity	molecular_function	0.74715	1	1	1654	43	49533	Cluster-34894.79917
GO:0046935	1-phosphatidylinositol-3-kinase regulator activity	molecular_function	0.74715	1	1	1654	43	49533	Cluster-34894.79917
GO:0097651	phosphatidylinositol 3-kinase complex, class I	cellular_component	0.74715	1	1	1654	43	49533	Cluster-34894.79917
GO:0000302	response to reactive oxygen species	biological_process	0.74724	1	1	1654	40	49533	Cluster-34894.16163
GO:1901031	regulation of response to reactive oxygen species	biological_process	0.74724	1	1	1654	40	49533	Cluster-34894.16163
GO:1902882	regulation of response to oxidative stress	biological_process	0.74724	1	1	1654	40	49533	Cluster-34894.16163
GO:0080090	regulation of primary metabolic process	biological_process	0.74738	1	168	1654	5063	49533	Cluster-34894.81977,Cluster-34894.28931,Cluster-34894.97614,Cluster-34894.69758,Cluster-34894.48218,Cluster-19183.0,Cluster-34894.43825,Cluster-34894.96585,Cluster-34894.99967,Cluster-16764.0,Cluster-34894.26738,Cluster-34894.38628,Cluster-34894.9691,Cluster-34894.8569,Cluster-34894.1162,Cluster-34894.58638,Cluster-34894.15710,Cluster-34894.55639,Cluster-34894.93780,Cluster-34894.36671,Cluster-34…
GO:0032774	RNA biosynthetic process	biological_process	0.74803	1	171	1654	5201	49533	Cluster-34894.78962,Cluster-34894.82747,Cluster-34894.11547,Cluster-34894.61778,Cluster-34894.62093,Cluster-34894.95357,Cluster-34894.69437,Cluster-34894.11711,Cluster-34894.80756,Cluster-34894.63014,Cluster-34894.6241,Cluster-34894.32665,Cluster-34894.16662,Cluster-34894.54456,Cluster-34894.81610,Cluster-34894.10023,Cluster-34894.45300,Cluster-34894.15292,Cluster-34894.84520,Cluster-16758.1,Clus…
GO:0051028	mRNA transport	biological_process	0.7484	1	4	1654	146	49533	Cluster-34894.69437,Cluster-34894.80202,Cluster-16758.1,Cluster-34894.91000
GO:0007067	mitotic nuclear division	biological_process	0.7485	1	7	1654	253	49533	Cluster-34894.96657,Cluster-34894.19751,Cluster-34894.99254,Cluster-34894.16182,Cluster-34894.58726,Cluster-34894.61660,Cluster-34894.96049
GO:0033218	amide binding	molecular_function	0.74956	1	1	1654	37	49533	Cluster-34894.99967
GO:0055085	transmembrane transport	biological_process	0.74957	1	72	1654	2205	49533	Cluster-34894.90004,Cluster-34894.29410,Cluster-34894.51497,Cluster-34894.78905,Cluster-34894.40744,Cluster-34894.15804,Cluster-34894.82360,Cluster-34894.57201,Cluster-34894.58030,Cluster-34894.28309,Cluster-34894.67261,Cluster-34894.73678,Cluster-34894.57734,Cluster-34894.96657,Cluster-34894.101377,Cluster-34894.61525,Cluster-34894.85012,Cluster-34894.79588,Cluster-34894.65083,Cluster-34894.3040…
GO:0000502	proteasome complex	cellular_component	0.74976	1	2	1654	77	49533	Cluster-34894.34758,Cluster-34894.14910
GO:0008653	lipopolysaccharide metabolic process	biological_process	0.75012	1	1	1654	40	49533	Cluster-32090.1
GO:0009103	lipopolysaccharide biosynthetic process	biological_process	0.75012	1	1	1654	40	49533	Cluster-32090.1
GO:0006006	glucose metabolic process	biological_process	0.75143	1	4	1654	151	49533	Cluster-34894.81829,Cluster-34894.41391,Cluster-34894.86397,Cluster-12597.1
GO:0016891	endoribonuclease activity, producing 5'-phosphomonoesters	molecular_function	0.75227	1	3	1654	109	49533	Cluster-34894.75683,Cluster-34894.9691,Cluster-34894.82207
GO:0010959	regulation of metal ion transport	biological_process	0.75354	1	1	1654	38	49533	Cluster-34894.33039
GO:0043269	regulation of ion transport	biological_process	0.75354	1	1	1654	38	49533	Cluster-34894.33039
GO:0044766	multi-organism transport	biological_process	0.75372	1	2	1654	80	49533	Cluster-34894.98268,Cluster-34894.61988
GO:0046794	transport of virus	biological_process	0.75372	1	2	1654	80	49533	Cluster-34894.61988,Cluster-34894.98268
GO:1902579	multi-organism localization	biological_process	0.75372	1	2	1654	80	49533	Cluster-34894.61988,Cluster-34894.98268
GO:0000151	ubiquitin ligase complex	cellular_component	0.75374	1	7	1654	238	49533	Cluster-25895.0,Cluster-34894.40384,Cluster-34894.71563,Cluster-34894.61859,Cluster-25895.1,Cluster-26774.0,Cluster-34894.1073
GO:0070085	glycosylation	biological_process	0.75376	1	7	1654	245	49533	Cluster-34894.13455,Cluster-34894.24538,Cluster-34894.24533,Cluster-34894.28196,Cluster-34894.13456,Cluster-34894.84053,Cluster-34894.29152
GO:0051801	cytolysis in other organism involved in symbiotic interaction	biological_process	0.75384	1	1	1654	40	49533	Cluster-34894.51841
GO:0052331	hemolysis in other organism involved in symbiotic interaction	biological_process	0.75384	1	1	1654	40	49533	Cluster-34894.51841
GO:0009187	cyclic nucleotide metabolic process	biological_process	0.75387	1	2	1654	76	49533	Cluster-34894.46408,Cluster-34894.17060
GO:0006359	regulation of transcription from RNA polymerase III promoter	biological_process	0.75501	1	1	1654	40	49533	Cluster-34894.97905
GO:0051536	iron-sulfur cluster binding	molecular_function	0.75553	1	7	1654	246	49533	Cluster-34894.109762,Cluster-34894.27174,Cluster-34894.100752,Cluster-34894.57277,Cluster-34894.68396,Cluster-34894.14404,Cluster-34894.17576
GO:0051540	metal cluster binding	molecular_function	0.75553	1	7	1654	246	49533	Cluster-34894.14404,Cluster-34894.17576,Cluster-34894.68396,Cluster-34894.57277,Cluster-34894.100752,Cluster-34894.27174,Cluster-34894.109762
GO:0018995	host	cellular_component	0.75555	1	13	1654	450	49533	Cluster-34894.26268,Cluster-34894.75421,Cluster-34894.66808,Cluster-34894.46098,Cluster-34894.51497,Cluster-34894.76226,Cluster-34894.58314,Cluster-34894.98268,Cluster-34894.53033,Cluster-34894.25247,Cluster-34894.78867,Cluster-34894.61988,Cluster-34894.42568
GO:0043657	host cell	cellular_component	0.75555	1	13	1654	450	49533	Cluster-34894.76226,Cluster-34894.98268,Cluster-34894.58314,Cluster-34894.25247,Cluster-34894.53033,Cluster-34894.78867,Cluster-34894.61988,Cluster-34894.42568,Cluster-34894.26268,Cluster-34894.75421,Cluster-34894.66808,Cluster-34894.46098,Cluster-34894.51497
GO:0098797	plasma membrane protein complex	cellular_component	0.75568	1	16	1654	533	49533	Cluster-29404.0,Cluster-34894.81721,Cluster-34894.53919,Cluster-34894.55456,Cluster-34894.32549,Cluster-34894.91575,Cluster-34894.75395,Cluster-34894.13896,Cluster-34894.58030,Cluster-34894.65039,Cluster-34894.34704,Cluster-34894.65879,Cluster-34894.40392,Cluster-34894.100797,Cluster-34894.8057,Cluster-34894.78970
GO:0031974	membrane-enclosed lumen	cellular_component	0.75649	1	49	1654	1580	49533	Cluster-34894.62093,Cluster-34894.44517,Cluster-34894.22823,Cluster-34894.72501,Cluster-34894.69437,Cluster-34894.22822,Cluster-34894.84846,Cluster-34894.60924,Cluster-34894.63014,Cluster-34894.80756,Cluster-34894.22821,Cluster-34894.10964,Cluster-34894.50527,Cluster-34894.35213,Cluster-34894.15292,Cluster-34894.15887,Cluster-34894.75218,Cluster-34894.101380,Cluster-34894.15714,Cluster-29366.0,Cl…
GO:0005740	mitochondrial envelope	cellular_component	0.75671	1	23	1654	772	49533	Cluster-34894.99970,Cluster-34894.70529,Cluster-16764.0,Cluster-34894.58468,Cluster-34894.97958,Cluster-34894.95221,Cluster-34894.94029,Cluster-34894.15804,Cluster-34894.69959,Cluster-34894.33968,Cluster-34894.86389,Cluster-34894.77939,Cluster-34894.89547,Cluster-34894.15621,Cluster-34894.102709,Cluster-29366.0,Cluster-34894.26738,Cluster-34894.22821,Cluster-34894.57734,Cluster-34894.86738,Cluste…
GO:0090533	cation-transporting ATPase complex	cellular_component	0.75736	1	1	1654	38	49533	Cluster-34894.55456
GO:0051818	disruption of cells of other organism involved in symbiotic interaction	biological_process	0.75757	1	1	1654	41	49533	Cluster-34894.51841
GO:0051883	killing of cells in other organism involved in symbiotic interaction	biological_process	0.75757	1	1	1654	41	49533	Cluster-34894.51841
GO:0008138	protein tyrosine/serine/threonine phosphatase activity	molecular_function	0.75764	1	5	1654	160	49533	Cluster-34894.64976,Cluster-34894.62878,Cluster-34894.57083,Cluster-34894.99221,Cluster-34894.57084
GO:0006260	DNA replication	biological_process	0.75784	1	45	1654	1430	49533	Cluster-34894.54640,Cluster-34894.45300,Cluster-34894.93780,Cluster-34894.50527,Cluster-34894.61808,Cluster-34894.63117,Cluster-34894.53865,Cluster-34894.15714,Cluster-34894.58120,Cluster-34894.105123,Cluster-34894.49717,Cluster-34894.47238,Cluster-34894.44517,Cluster-34894.16562,Cluster-34894.50863,Cluster-34894.45002,Cluster-34894.7700,Cluster-34894.71031,Cluster-34894.41967,Cluster-34894.55720…
GO:0015103	inorganic anion transmembrane transporter activity	molecular_function	0.75875	1	2	1654	77	49533	Cluster-23506.0,Cluster-34894.50774
GO:0016538	cyclin-dependent protein serine/threonine kinase regulator activity	molecular_function	0.75887	1	1	1654	37	49533	Cluster-34894.65876
GO:0006284	base-excision repair	biological_process	0.7593	1	1	1654	40	49533	Cluster-36048.0
GO:0005315	inorganic phosphate transmembrane transporter activity	molecular_function	0.75952	1	1	1654	41	49533	Cluster-34894.70759
GO:0015171	amino acid transmembrane transporter activity	molecular_function	0.75955	1	2	1654	73	49533	Cluster-34894.47234,Cluster-34894.96289
GO:0019538	protein metabolic process	biological_process	0.75982	1	250	1654	7517	49533	Cluster-34894.57083,Cluster-34894.54542,Cluster-34894.58388,Cluster-34894.55056,Cluster-34894.32665,Cluster-34894.16662,Cluster-34894.44921,Cluster-34894.86322,Cluster-19987.1,Cluster-34894.43877,Cluster-34894.56264,Cluster-34894.61808,Cluster-34894.89318,Cluster-34894.41361,Cluster-34894.5681,Cluster-30483.0,Cluster-34894.8460,Cluster-25895.1,Cluster-34894.29868,Cluster-34894.104730,Cluster-3489…
GO:0098796	membrane protein complex	cellular_component	0.75987	1	84	1654	2678	49533	Cluster-34894.81721,Cluster-34894.89547,Cluster-34894.72073,Cluster-34894.90034,Cluster-29404.0,Cluster-34894.77127,Cluster-34894.33419,Cluster-34894.26738,Cluster-34894.32549,Cluster-34894.22821,Cluster-34894.79358,Cluster-34894.83060,Cluster-34894.47996,Cluster-34894.13896,Cluster-34894.68037,Cluster-34894.97722,Cluster-16764.0,Cluster-34894.100797,Cluster-34894.97958,Cluster-34894.76583,Cluste…
GO:0042181	ketone biosynthetic process	biological_process	0.75988	1	5	1654	184	49533	Cluster-29366.0,Cluster-34894.54153,Cluster-34894.21131,Cluster-34894.48364,Cluster-34894.58364
GO:0016477	cell migration	biological_process	0.76048	1	2	1654	84	49533	Cluster-34894.60314,Cluster-34894.21275
GO:0030334	regulation of cell migration	biological_process	0.76048	1	2	1654	84	49533	Cluster-34894.21275,Cluster-34894.60314
GO:0044215	other organism	cellular_component	0.76065	1	13	1654	452	49533	Cluster-34894.58314,Cluster-34894.98268,Cluster-34894.76226,Cluster-34894.61988,Cluster-34894.42568,Cluster-34894.25247,Cluster-34894.53033,Cluster-34894.78867,Cluster-34894.75421,Cluster-34894.26268,Cluster-34894.46098,Cluster-34894.51497,Cluster-34894.66808
GO:0044216	other organism cell	cellular_component	0.76065	1	13	1654	452	49533	Cluster-34894.66808,Cluster-34894.46098,Cluster-34894.51497,Cluster-34894.26268,Cluster-34894.75421,Cluster-34894.78867,Cluster-34894.25247,Cluster-34894.53033,Cluster-34894.42568,Cluster-34894.61988,Cluster-34894.76226,Cluster-34894.98268,Cluster-34894.58314
GO:0044217	other organism part	cellular_component	0.76065	1	13	1654	452	49533	Cluster-34894.78867,Cluster-34894.53033,Cluster-34894.25247,Cluster-34894.42568,Cluster-34894.61988,Cluster-34894.76226,Cluster-34894.98268,Cluster-34894.58314,Cluster-34894.66808,Cluster-34894.51497,Cluster-34894.46098,Cluster-34894.26268,Cluster-34894.75421
GO:0005777	peroxisome	cellular_component	0.76095	1	2	1654	79	49533	Cluster-34894.57008,Cluster-34894.93780
GO:0042579	microbody	cellular_component	0.76095	1	2	1654	79	49533	Cluster-34894.57008,Cluster-34894.93780
GO:0019438	aromatic compound biosynthetic process	biological_process	0.7624	1	203	1654	6159	49533	Cluster-16718.0,Cluster-34894.40392,Cluster-34894.95221,Cluster-34894.44917,Cluster-34894.49731,Cluster-34894.63209,Cluster-34894.83425,Cluster-34894.8401,Cluster-34894.7647,Cluster-34894.77308,Cluster-34894.10203,Cluster-34894.84142,Cluster-34894.37405,Cluster-20810.0,Cluster-34894.59587,Cluster-34894.78750,Cluster-34894.36035,Cluster-34894.63399,Cluster-34894.46098,Cluster-34894.82436,Cluster-3…
GO:0001510	RNA methylation	biological_process	0.76257	1	2	1654	74	49533	Cluster-34894.41687,Cluster-24315.0
GO:0044459	plasma membrane part	cellular_component	0.76292	1	25	1654	813	49533	Cluster-34894.71967,Cluster-34894.58030,Cluster-34894.13896,Cluster-34894.65039,Cluster-34894.58314,Cluster-34894.56478,Cluster-34894.100797,Cluster-34894.82170,Cluster-34894.58281,Cluster-34894.78970,Cluster-34894.8057,Cluster-34894.34704,Cluster-34894.54578,Cluster-34894.65879,Cluster-34894.40392,Cluster-34894.81721,Cluster-34894.53919,Cluster-34894.55456,Cluster-29404.0,Cluster-34894.32549,Clu…
GO:0000278	mitotic cell cycle	biological_process	0.76318	1	16	1654	545	49533	Cluster-34894.58726,Cluster-34894.59925,Cluster-34894.96657,Cluster-34894.15710,Cluster-34894.10023,Cluster-34894.96049,Cluster-34894.99254,Cluster-34894.79588,Cluster-19252.0,Cluster-34894.61660,Cluster-34894.48898,Cluster-34894.45995,Cluster-34894.19751,Cluster-34894.16182,Cluster-34894.15712,Cluster-34894.80873
GO:1903047	mitotic cell cycle process	biological_process	0.76318	1	16	1654	545	49533	Cluster-34894.16182,Cluster-34894.80873,Cluster-34894.15712,Cluster-19252.0,Cluster-34894.61660,Cluster-34894.45995,Cluster-34894.48898,Cluster-34894.19751,Cluster-34894.96049,Cluster-34894.99254,Cluster-34894.79588,Cluster-34894.59925,Cluster-34894.58726,Cluster-34894.10023,Cluster-34894.96657,Cluster-34894.15710
GO:0019012	virion	cellular_component	0.76366	1	50	1654	1597	49533	Cluster-34894.36984,Cluster-34894.61778,Cluster-34894.43168,Cluster-34894.27841,Cluster-22263.0,Cluster-34894.64976,Cluster-34894.13548,Cluster-34894.22385,Cluster-34894.13201,Cluster-34894.13361,Cluster-34894.55621,Cluster-34894.31740,Cluster-34894.18540,Cluster-34894.24432,Cluster-34894.69959,Cluster-34894.19407,Cluster-34894.19751,Cluster-34894.78941,Cluster-34894.27484,Cluster-34894.27247,Clu…
GO:0070206	protein trimerization	biological_process	0.76445	1	4	1654	156	49533	Cluster-34894.15713,Cluster-34894.46259,Cluster-34894.16182,Cluster-34894.96049
GO:0071826	ribonucleoprotein complex subunit organization	biological_process	0.7648	1	1	1654	44	49533	Cluster-34894.57548
GO:0046677	response to antibiotic	biological_process	0.7656	1	1	1654	40	49533	Cluster-34894.25010
GO:0043900	regulation of multi-organism process	biological_process	0.76606	1	2	1654	81	49533	Cluster-18299.0,Cluster-34894.79693
GO:0017176	phosphatidylinositol N-acetylglucosaminyltransferase activity	molecular_function	0.76615	1	1	1654	40	49533	Cluster-34894.100752
GO:0003333	amino acid transmembrane transport	biological_process	0.76635	1	2	1654	73	49533	Cluster-34894.8751,Cluster-34894.96289
GO:0004721	phosphoprotein phosphatase activity	molecular_function	0.7668	1	8	1654	265	49533	Cluster-34894.73498,Cluster-34894.11396,Cluster-34894.62878,Cluster-34894.57083,Cluster-34894.57084,Cluster-34894.11548,Cluster-34894.64976,Cluster-34894.99221
GO:0031406	carboxylic acid binding	molecular_function	0.76806	1	1	1654	43	49533	Cluster-34894.11416
GO:0043177	organic acid binding	molecular_function	0.76806	1	1	1654	43	49533	Cluster-34894.11416
GO:0006777	Mo-molybdopterin cofactor biosynthetic process	biological_process	0.76839	1	1	1654	42	49533	Cluster-34894.34704
GO:0019720	Mo-molybdopterin cofactor metabolic process	biological_process	0.76839	1	1	1654	42	49533	Cluster-34894.34704
GO:0040011	locomotion	biological_process	0.76849	1	27	1654	915	49533	Cluster-34894.62000,Cluster-34894.15712,Cluster-34894.61988,Cluster-14514.0,Cluster-34894.101694,Cluster-34894.62381,Cluster-34894.35044,Cluster-34894.14094,Cluster-34894.70207,Cluster-34894.35864,Cluster-34894.19751,Cluster-13177.1,Cluster-34894.49717,Cluster-37016.0,Cluster-34894.58707,Cluster-34894.15713,Cluster-34894.98727,Cluster-34894.96049,Cluster-34894.15714,Cluster-34894.47768,Cluster-34…
GO:0043241	protein complex disassembly	biological_process	0.76863	1	3	1654	116	49533	Cluster-34894.36683,Cluster-34894.43248,Cluster-34894.77674
GO:0043244	regulation of protein complex disassembly	biological_process	0.76863	1	3	1654	116	49533	Cluster-34894.36683,Cluster-34894.43248,Cluster-34894.77674
GO:0000175	3'-5'-exoribonuclease activity	molecular_function	0.76922	1	1	1654	37	49533	Cluster-34894.26738
GO:0004532	exoribonuclease activity	molecular_function	0.76922	1	1	1654	37	49533	Cluster-34894.26738
GO:0016896	exoribonuclease activity, producing 5'-phosphomonoesters	molecular_function	0.76922	1	1	1654	37	49533	Cluster-34894.26738
GO:0031966	mitochondrial membrane	cellular_component	0.76964	1	21	1654	713	49533	Cluster-34894.58468,Cluster-16764.0,Cluster-34894.97958,Cluster-34894.95221,Cluster-34894.33968,Cluster-34894.15804,Cluster-34894.94029,Cluster-34894.69959,Cluster-34894.99970,Cluster-34894.70529,Cluster-34894.22821,Cluster-34894.29411,Cluster-34894.29410,Cluster-34894.83060,Cluster-34894.86738,Cluster-34894.57734,Cluster-34894.15621,Cluster-34894.86389,Cluster-34894.77939,Cluster-34894.26738,Clu…
GO:0030291	protein serine/threonine kinase inhibitor activity	molecular_function	0.76964	1	1	1654	38	49533	Cluster-34894.65876
GO:0043604	amide biosynthetic process	biological_process	0.77032	1	51	1654	1650	49533	Cluster-34894.18447,Cluster-16718.0,Cluster-34894.15032,Cluster-34894.17406,Cluster-34894.95221,Cluster-8208.0,Cluster-34894.8057,Cluster-34894.2329,Cluster-34894.63209,Cluster-34894.51934,Cluster-34894.46661,Cluster-34894.8401,Cluster-34894.31170,Cluster-34894.52963,Cluster-34894.18092,Cluster-34894.14311,Cluster-34894.19990,Cluster-34894.53349,Cluster-34894.36035,Cluster-34894.31116,Cluster-258…
GO:0052652	cyclic purine nucleotide metabolic process	biological_process	0.77053	1	1	1654	38	49533	Cluster-34894.17060
GO:0005672	transcription factor TFIIA complex	cellular_component	0.77204	1	2	1654	76	49533	Cluster-34894.21651,Cluster-34894.80756
GO:0031985	Golgi cisterna	cellular_component	0.77236	1	1	1654	42	49533	Cluster-34894.49352
GO:0044710	single-organism metabolic process	biological_process	0.77283	1	327	1654	9838	49533	Cluster-33830.1,Cluster-34894.17292,Cluster-34894.10023,Cluster-34894.17293,Cluster-34894.14945,Cluster-34894.25219,Cluster-25267.0,Cluster-34894.86735,Cluster-34894.78905,Cluster-34894.98267,Cluster-34894.41361,Cluster-34894.62093,Cluster-34894.65517,Cluster-34894.82747,Cluster-34894.48533,Cluster-34894.27829,Cluster-34894.53542,Cluster-34894.10810,Cluster-34894.29908,Cluster-34894.41486,Cluster…
GO:0050790	regulation of catalytic activity	biological_process	0.77357	1	23	1654	734	49533	Cluster-34894.51255,Cluster-34894.97991,Cluster-34894.58724,Cluster-34894.63056,Cluster-34894.15299,Cluster-34894.9314,Cluster-34894.81524,Cluster-34894.96661,Cluster-34894.93280,Cluster-34894.39409,Cluster-34894.89541,Cluster-34894.109762,Cluster-34894.73279,Cluster-34894.65876,Cluster-34894.61329,Cluster-34894.88440,Cluster-34894.5263,Cluster-34894.70840,Cluster-34894.45734,Cluster-34894.81525,…
GO:0008948	oxaloacetate decarboxylase activity	molecular_function	0.77374	1	5	1654	197	49533	Cluster-34894.66806,Cluster-34894.37600,Cluster-34894.43602,Cluster-34894.59866,Cluster-34894.35111
[truncated: 806 more rows]

## Sheet: 6.35Trpvs1.85Trp_up
GO_accession	Description	Term_type	Over_represented_pValue	Corrected_pValue	DEG_item	DEG_list	Bg_item	Bg_list	Gene_names
[truncated: 2,432 more rows]

[truncated: 1 more sheets: 6.35Trpvs1.85Trp_down]
