# Supplementary material for: Effect of Dietary Tryptophan on Growth, Intestinal Microbiota, and Intestinal Gene Expression in an Improved Triploid Crucian Carp
Source: Front Nutr. 2021 Jun 17;8:676035. doi: 10.3389/fnut.2021.676035 (PMC8247481; doi:10.3389/fnut.2021.676035)
Supplement: Supplementary file 5 [file Table_5.xlsx]

## Sheet: string-interactions
#node1	node2	combined_score
rack1	rpl4	0.999
copb1	arcn1a	0.999
gale	galt	0.999
srp54	srp68	0.999
nol6	mphosph10	0.999
mcm10	mcm4	0.999
pwp2h	mphosph10	0.999
nckap1	cyfip1	0.999
psmc4	psmc2	0.999
rpl4	rpl18a	0.999
mcm10	cdc6	0.999
psmd8	psmc2	0.999
copb1	copg2	0.999
rpl34	rpl23a	0.999
mtor	rptor	0.999
mcm4	mcm3	0.999
psmd1	psmd12	0.999
uba52	rpl23a	0.999
farsa	farsb	0.999
orc1	mcm4	0.999
psmd12	psmd11b	0.999
psmd12	psmc2	0.999
psmd1	psmd8	0.999
rack1	rpl23a	0.999
orc1	mcm2	0.999
wdr43	nol6	0.999
psmc4	psmd8	0.999
psmd12	psmc4	0.999
mcm5	mcm3	0.999
mcm4	cdc6	0.999
uba52	rps27.1	0.999
psmd1	psmd11b	0.999
psmc4	psmd11b	0.999
rpl34	rpl4	0.999
rack1	uba52	0.999
mcm2	mcm5	0.999
psmd12	usp14	0.999
mcm5	cdc6	0.999
rpl34	rpl18a	0.999
rack1	rpl18a	0.999
psmd1	psmc2	0.999
psmd8	psmd11b	0.999
copg2	arcn1a	0.999
msmo1	cyp51	0.999
prpf8	snrnp200	0.999
nckap1	cyfip2	0.999
psmd1	psmc4	0.999
pdha1a	dlat	0.999
copb2	arcn1a	0.999
mcm4	mcm5	0.999
rpl18a	rpl23a	0.999
apcxb	axin1	0.999
copb1	copb2	0.999
pwp2h	nol6	0.999
usp14	psmc4	0.999
col1a2	col1a1a	0.999
mcm4	mcm2	0.999
mcm2	mcm3	0.999
uba52	rpl4	0.999
msmo1	nsdhl	0.999
orc1	mcm5	0.999
uba52	rpl18a	0.999
pds5b	smc3	0.999
jun	fosab	0.999
hadhb	hadhab	0.999
rpl34	uba52	0.999
copb2	copg2	0.999
mcm2	cdc6	0.999
rrs1	nifk	0.999
mcm10	mcm2	0.999
psmd12	psmd8	0.999
col6a1	col6a2	0.999
rpl4	rpl23a	0.999
orc1	cdc6	0.999
sf3b3	prpf8	0.999
usp14	psmc2	0.999
wdr43	mphosph10	0.999
lss	cyp51	0.999
hadhb	hadhaa	0.999
per2	cry1a	0.998
sf3b3	snrnp200	0.998
pik3c3	pik3r4	0.998
nifk	ddx18	0.998
usp14	psmd8	0.998
ndufs1	uqcrc2b	0.998
hadhb	hadh	0.998
mcm10	mcm5	0.998
cdc6	mcm3	0.998
idi1	msmo1	0.998
psmd1	usp14	0.998
wdr43	pwp2h	0.998
copb1	arcn1b	0.998
col6a1	col1a1a	0.998
srp54	rpl23a	0.998
psmd11b	psmc2	0.997
rack1	eef1a1l1	0.997
pard3ab	prkci	0.997
skp2	cdc20	0.997
arcn1b	copb2	0.997
gnl3	nifk	0.997
cul1a	skp2	0.997
stag1a	smc3	0.997
hspd1	hspa9	0.997
rpl34	rack1	0.997
erbb3a	nrg1	0.997
h6pd	pgd	0.997
idi1	FDFT1	0.997
col5a2a	col1a2	0.997
gnl3	nop2	0.996
msmo1	lss	0.996
rps27.1	rpl23a	0.996
sqlea	lss	0.996
mapk8b	jun	0.996
arcn1b	copg2	0.996
actn1	vcla	0.996
idi1	mvda	0.996
nop2	nifk	0.996
rps6kb1a	mtor	0.996
pmvk	mvk	0.996
crk	abl1	0.996
orc1	mcm10	0.995
col5a2a	col1a1a	0.995
mcm10	mcm3	0.995
dync1li2	DYNC1H1	0.995
fdps	mvda	0.995
orc1	mcm3	0.995
yars	tars	0.995
tpi1b	gapdhs	0.995
mcm5	cdc20	0.995
jak1	stat1a	0.995
stag2b	smc3	0.994
idi1	fdps	0.994
ipmkb	itpk1a	0.994
rpl18a	rps27.1	0.994
postnb	col1a1a	0.994
rpl34	rps27.1	0.994
lss	nsdhl	0.994
pds5b	dhdh	0.994
itgb6	itgav	0.994
bmp2b	chrd	0.993
srp68	rpl23a	0.993
vps28	vps37a	0.993
ela2l	cpa5	0.993
NCKAP1L	cyfip2	0.993
stag1a	pds5b	0.993
aspm	cdc20	0.993
mpi	pmm2	0.992
srp54	rpl18a	0.992
acadm	hadhb	0.992
nop2	ddx18	0.992
bcar1	crk	0.992
cpb1	ela3l	0.992
nop2	gtpbp4	0.992
sirt1	tp53	0.992
polr2b	polr2a	0.992
usp14	psmd11b	0.992
cyfip1	NCKAP1L	0.992
col1a2	postnb	0.992
rrs1	nop2	0.992
hadhab	acat2	0.991
vegfab	kdr	0.991
nifk	gtpbp4	0.991
msmo1	tm7sf2	0.991
rack1	rps27.1	0.991
gosr2	sec22ba	0.991
dhdh	smc3	0.991
yars	farsa	0.991
FDFT1	cyp51	0.991
rab11fip2	rab11a	0.991
cry1a	arntl1a	0.991
gosr2	stx5a	0.991
eif2b5	eif2s2	0.99
uba52	psmc2	0.99
g6pd	pgls	0.99
hadh	acat2	0.99
lss	FDFT1	0.99
nrg1	erbb2	0.99
ugp2b	galt	0.99
fdps	FDFT1	0.99
aff4	ell	0.99
srp54	rpl34	0.99
uba52	psmc4	0.99
idi1	cyp51	0.99
srp54	uba52	0.99
srp68	rpl34	0.99
cyp51	tm7sf2	0.99
srp68	uba52	0.99
mtor	rictorb	0.99
sqlea	msmo1	0.99
nol6	ddx18	0.99
smc1b	smc3	0.99
col6a2	col1a1a	0.99
pgls	pgd	0.989
nsdhl	cyp51	0.989
psmd12	uba52	0.989
fn1a	itga5	0.989
msmo1	FDFT1	0.989
srp68	rpl18a	0.989
sqlea	FDFT1	0.989
col1a2	col6a1	0.989
jak1	stat5a	0.989
rpl4	eef1a1l1	0.988
rpl34	rps27.2	0.988
sc5d	cyp51	0.988
rpl4	rps27.1	0.988
cry-dash	ddb2	0.988
ippk	itpk1a	0.988
pwp2h	ddx18	0.988
cry1a	per3	0.988
cpa5	ela3l	0.988
ikbkg	nfkbiab	0.988
rrs1	nol6	0.987
lama5	lamc1	0.987
nop2	nol6	0.987
cpb1	ela2l	0.987
nifk	ppan	0.987
rps27.2	uba52	0.987
gnl3	gtpbp4	0.987
acvr1l	bmp2b	0.987
nle1	gnl3	0.987
mmab	mmaa	0.986
itgb1a	itga5	0.986
pikfyve	pik3c3	0.986
rrs1	gnl3	0.986
pkma	ldha	0.986
ulk1b	pik3c3	0.986
pfas	atic	0.986
ulk1b	mtor	0.985
ikbkg	card11	0.985
aclya	acaca	0.985
ddx18	gtpbp4	0.985
gosr2	uso1	0.985
ddx18	mphosph10	0.985
pmm2	gmppb	0.985
cbl	grb2a	0.985
idi1	nsdhl	0.985
hadhaa	acat2	0.985
vcla	ctnna1	0.985
sec22ba	stx5a	0.985
wdr43	nifk	0.984
stag2b	pds5b	0.984
arhgap35a	rhocb	0.984
ela2	cpb1	0.984
ippk	ipmkb	0.984
prss1	cpa5	0.984
pwp2h	nifk	0.984
cyp7a1	hsd3b7	0.983
hmgcra	mvk	0.983
mvda	lss	0.983
rps6kb1a	rptor	0.983
rdh12	aldh1a2	0.983
stag1a	dhdh	0.983
cry1a	per1b	0.982
nle1	gtpbp4	0.982
uba52	psmd11b	0.982
FDFT1	nsdhl	0.982
amy2a	ela3l	0.982
fdps	dhdds	0.982
eif2s2	rpl18a	0.982
cpb1	prss1	0.982
ugt1a1	cyp1a	0.982
pik3cb	pik3r1	0.982
coasy	pank1b	0.982
yars	rars	0.982
acadvl	hadhb	0.982
vcla	actn4	0.981
numb	notch1a	0.981
mgat4a	mgat5	0.981
tnnt2a	tpma	0.981
nle1	nifk	0.981
crebbpa	hif1ab	0.981
cbl	uba52	0.981
pkma	gapdhs	0.981
mgat5	mgat4b	0.981
arrb2b	grk3	0.981
nol6	nifk	0.981
got2a	mdh1aa	0.981
igf2r	m6pr	0.981
fn1a	vcla	0.981
hmgcra	cyp51	0.981
mmp14a	mmp2	0.981
rps27.2	rpl4	0.981
gbf1	copg2	0.981
rps27.2	rack1	0.98
wdr43	mybbp1a	0.98
wdr43	rrs1	0.98
dhcr24	lss	0.98
stx5a	uso1	0.98
crebbpa	tp53	0.98
wdr43	gtpbp4	0.979
sec22ba	uso1	0.979
dhcr24	cyp51	0.979
itgav	itgb1a	0.979
cbl	crk	0.979
igf1rb	igf1ra	0.979
nr1d2b	nr1d1	0.979
aclya	dlat	0.979
sqlea	nsdhl	0.979
psmd1	uba52	0.978
gnl3	ddx18	0.978
uba52	psmd8	0.978
rps27.2	rpl18a	0.977
acadm	hadh	0.977
srp54	rpl4	0.977
ppan	mphosph10	0.977
mvda	mvk	0.977
sucla2	sdha	0.977
fn1a	itgav	0.977
arfgap2	copg2	0.977
nrg1	erbb3b	0.977
stag2b	dhdh	0.977
wdr43	ddx18	0.977
actn1	actn4	0.976
ela2	cpa5	0.976
sf3b3	sf1	0.976
bmp2b	bmpr2b	0.976
pkma	pcxb	0.976
cpb1	cpa5	0.976
hspd1	hspa4a	0.975
mtor	prkaa1	0.975
pik3r1	pik3cd	0.975
prss1	ela3l	0.975
sc5d	ebp	0.975
fn1a	itgb1a	0.974
acadvl	hadhaa	0.974
tars	larsb	0.974
col5a2a	plod2	0.974
cpt2	acadm	0.974
rrs1	gtpbp4	0.974
sqlea	cyp51	0.974
eif2s2	abcf1	0.973
ela2	ela3l	0.973
ddb2	xpcxb	0.973
arhgap5	rhocb	0.973
rps27.2	rpl23a	0.973
cry1a	per1a	0.973
ela2	amy2a	0.973
g6pd	pgd	0.973
vcla	tln2b	0.973
yars	larsb	0.973
sc5d	msmo1	0.973
idi1	lss	0.973
ela2l	ela3l	0.972
smpd5	smpd2a	0.972
copg2	sec22ba	0.972
nop2	mphosph10	0.972
itgb6	itga5	0.972
ugp2b	gale	0.972
pcxb	pdha1a	0.972
cel.2	ela3l	0.971
cpb1	amy2a	0.971
ela2l	amy2a	0.971
h6pd	tpi1b	0.971
pik3r1	pik3cg	0.971
pikfyve	pi4kaa	0.971
epn2	ap2a1	0.971
cpt2	acadvl	0.971
nle1	rrs1	0.97
cyp8b1	hsd3b7	0.97
mcm2	cdc20	0.97
egfra	pik3r1	0.97
bmp2b	bmpr2a	0.97
cul1a	cdc20	0.97
orc1	skp2	0.97
pkmb	ldha	0.97
ikbkg	uba52	0.969
gosr2	copb2	0.969
col1a2	col6a2	0.969
ela2	cpa4	0.968
acadm	hadhaa	0.968
fosab	jdp2b	0.968
pard3ab	prkcz	0.968
myd88	tlr3	0.968
arhgef4	apcxb	0.968
col5a2a	col6a1	0.968
myo5b	rab11a	0.968
aclya	pcxb	0.968
dpm3	gmppb	0.968
insra	igf1ra	0.967
cbl	pik3r1	0.967
uba52	LTN1	0.967
vegfab	fn1a	0.967
pwp2h	rbm19	0.967
prss1	ela2l	0.967
pkma	pdha1a	0.967
dync1i2b	DYNC1H1	0.967
chkb	pcxbyt2	0.967
cry-dash	tefa	0.967
nop16	nifk	0.967
ela2	ela2l	0.966
dhcr24	msmo1	0.966
me1	pcxb	0.966
dhcr24	sc5d	0.966
ulk1b	pik3r4	0.966
mgat2	mgat3b	0.966
smpd1	ugcg	0.966
egfra	esr1	0.966
pygb	agla	0.966
grpel1	hspa9	0.965
ppp2r5ea	cdc20	0.965
rbks	tktb	0.965
smc1b	stag1a	0.965
mgat2	mgat4b	0.965
mgat4a	mgat2	0.965
acadm	hadhab	0.965
pcxbyt2	chka	0.965
mgat3b	mgat4b	0.965
dync1i2b	dync1li2	0.964
aco2	uqcrc2b	0.964
mgat4a	mgat3b	0.964
msmo1	hmgcra	0.964
cpb1	cpa4	0.964
fn1a	thbs1b	0.963
erbb2	pik3r1	0.963
cdc6	cdc20	0.963
ulk1b	rptor	0.963
ugt1a1	cyp3a65	0.963
rras2	pik3cd	0.963
copb1	uso1	0.963
ndufs1	sdha	0.963
smpd1	smpd2a	0.963
ppan	gtpbp4	0.963
nckap1	waslb	0.963
nifk	mphosph10	0.963
acadvl	hadhab	0.963
sc5d	FDFT1	0.963
aldh1a2	rdh10a	0.963
asns	got2a	0.962
mmp2	col1a1a	0.962
ptdss2	pisd	0.962
gosr2	copg2	0.962
lama5	itgb1a	0.962
rxraa	crebbpa	0.962
g6pd	hk2	0.962
got2a	ldha	0.961
acaca	acss2	0.961
fn1a	bcar1	0.961
tm7sf2	ebp	0.961
prss1	amy2a	0.961
uba52	smurf2	0.961
mphosph10	gtpbp4	0.96
copb2	uso1	0.96
rrs1	pwp2h	0.96
gnl3	nol6	0.96
itga1	itgb1a	0.96
idi1	hmgcra	0.96
prkaa1	rptor	0.959
sqlea	hmgcra	0.959
ela2l	cel.2	0.959
pkmb	pcxb	0.959
gapdhs	tktb	0.959
ptpn2b	stat1a	0.959
EPT1	pcxbyt2	0.959
pcxb	mdh1aa	0.959
copb2	sec22ba	0.958
il6r	jak1	0.958
smc1b	stag2b	0.958
pik3cd	rras	0.958
col1a2	plod2	0.958
wdr43	rbm19	0.958
h6pd	gapdhs	0.957
mapk8b	tp53	0.957
arfgap2	copb2	0.957
ins	insra	0.957
yars	farsb	0.957
rack1	smpd2a	0.957
fosab	dusp1	0.957
aoc1	srm	0.957
srm	sat1a.1	0.957
degs2	UGT8	0.957
aclya	acacb	0.957
sqstm1	uba52	0.957
aclya	aco2	0.956
rrs1	mphosph10	0.956
arfgap2	copb1	0.956
etnk2	pcxbyt2	0.956
impdh1b	atic	0.956
pcxb	ldha	0.955
rrs1	ppan	0.955
copb1	gbf1	0.955
tktb	prps1a	0.955
fdps	lss	0.955
cul1a	psmd11b	0.955
srp68	rpl4	0.955
copg2	stx5a	0.955
cpa4	ela3l	0.955
cry1a	tefa	0.955
itgb2	itgav	0.955
cyfip2	waslb	0.955
egfra	stat5a	0.954
rrs1	ddx18	0.954
plod2	col1a1a	0.954
ahr2	cyp1a	0.954
h6pd	pkmb	0.954
h6pd	pkma	0.954
arfgap2	gbf1	0.954
eif4e1c	abcf2a	0.953
erbb3b	grb2a	0.953
erbb3a	grb2a	0.953
EPT1	pisd	0.953
aclya	mdh1aa	0.953
actb2	vcla	0.953
ldha	pdha1a	0.953
egfra	grb2a	0.953
rbks	prps1a	0.953
erbb2	grb2a	0.953
ugcg	b4galt6	0.953
sc5d	lss	0.953
cyp3a65	cyp1a	0.953
ptdss1a	pisd	0.953
mapkapk2a	mapk12a	0.953
degs2	ugcg	0.953
hadhaa	hadh	0.953
smpd2a	ugcg	0.952
ahcyl1	itpr1b	0.952
ret	grb2a	0.952
rpl23a	eef1a1l1	0.952
mcm4	cdc20	0.952
arfgap2	sec22ba	0.952
crebbpa	esr1	0.952
actb2	waslb	0.952
fut8a	mgat3b	0.952
eif2s2	rpl23a	0.951
cad	asns	0.951
rbm19	mphosph10	0.951
mvda	FDFT1	0.951
ipmkb	itpkb	0.951
ugp2b	pygb	0.95
cel.2	amy2a	0.95
vegfab	thbs1b	0.95
actb2	eef1a1l1	0.95
ela2	prss1	0.95
ctnna1	cdh17	0.95
kmt2a	setd1ba	0.949
cyfip1	waslb	0.949
nop2	pwp2h	0.949
dhcr24	tm7sf2	0.949
pi4k2a	pikfyve	0.949
ehmt2	tp53	0.949
entpd4	atic	0.949
ghra	stat5a	0.949
stat5a	stat1a	0.949
me1	mdh1aa	0.949
pikfyve	pi4k2b	0.949
ugcg	galcb	0.948
hadhaa	hadhab	0.948
mpi	hk2	0.948
prkar1ab	prkacba	0.948
ddb2	tefa	0.948
sdha	uqcrc2b	0.948
vegfab	kdrl	0.948
prkacaa	prkar1ab	0.948
col5a2a	col6a2	0.947
crk	kdr	0.947
gbf1	copb2	0.947
idi1	sqlea	0.947
col1a2	col1a1b	0.947
itgb1a	lamc1	0.947
ugt1a1	cyp1b1	0.947
col5a2a	p4ha1b	0.947
vcla	tpma	0.946
copg2	uso1	0.946
arpcxb5b	waslb	0.946
pik3c2a	grb2a	0.946
ahcyl1	itpr1ba	0.946
mcm4	smc3	0.946
NCKAP1L	waslb	0.946
arhgef4	rhocb	0.946
cpb1	c6ast3	0.946
pkma	tktb	0.946
rpl34	eif2s2	0.946
igf1rb	insra	0.946
tars	farsb	0.946
impdh2	atic	0.946
g6pd	gapdhs	0.946
degs2	galcb	0.945
rbm19	ddx18	0.945
hk2	gnpnat1	0.945
fut8a	mgat2	0.945
cad	got2a	0.945
me1	pkma	0.945
nckap1	crk	0.944
fut8a	mgat4b	0.944
braf	rras	0.944
pik3r1	grb2a	0.944
gbf1	uso1	0.944
ahcyl1	cbsb	0.944
il6r	stat1a	0.944
actb2	arpcxb5b	0.944
uba52	mcm5	0.944
fdps	cyp51	0.944
mgat4a	fut8a	0.944
dhcr24	ebp	0.944
smc3	cdc20	0.943
h6pd	hk2	0.943
ahr2	cyp1c1	0.943
erbb3a	erbb2	0.943
llgl2	prkci	0.943
pcxbyt1aa	chkb	0.943
pik3c2a	pikfyve	0.943
pcxbyt1aa	chka	0.943
ugcg	asah2	0.943
rpl18a	eef1a1l1	0.943
acvr1l	bmpr2a	0.943
atp6v1aa	atp6v1ba	0.943
egfra	nrg1	0.943
sgpp1	asah2	0.942
ndufs1	sucla2	0.942
glula	glsb	0.942
pcxbcb	pcxb	0.942
ptdss2	EPT1	0.942
erbb2	erbb3b	0.942
mgat2	gnpnat1	0.942
ap2a1	igf2r	0.942
ppardb	rxraa	0.942
h6pd	g6pd	0.942
pkmb	pdha1a	0.942
notch2	numb	0.941
acss2	acacb	0.941
sc5d	nsdhl	0.941
card11	prkcbb	0.941
ret	pik3r1	0.941
copb1	gosr2	0.941
itga2.2	itgb1a	0.941
acvr1l	bmpr2b	0.941
pik3c3	pi4k2b	0.941
mcm4	msh6	0.941
dlat	acat2	0.941
pi4k2a	pik3c3	0.941
nckap1	abl1	0.941
ap2a1	cltca	0.94
grb2a	waslb	0.94
dimt1l	nifk	0.94
pik3r1	erbb3b	0.94
cpb1	cel.2	0.94
me1	pkmb	0.94
pik3cb	pik3cg	0.94
psmd8	cdc25b	0.94
eif2s2	rpl4	0.94
nop2	ppan	0.939
fn1a	lamc1	0.939
acss2	acat2	0.939
pygb	amy2a	0.939
tars	farsa	0.939
smpd1	smpd5	0.939
ulk1b	prkaa1	0.939
arhgef6	rhocb	0.939
iqgap2	ctnna1	0.939
erbb3a	pik3r1	0.939
mt-co1	uqcrc2b	0.939
rxraa	rxrgb	0.938
nsdhl	ebp	0.938
arcn1b	stx5a	0.938
bmp2b	smurf2	0.938
fn1a	braf	0.938
cyp1a	cyp1c1	0.938
gpam	gpat4	0.938
vav3b	grb2a	0.938
yars	lars2	0.938
g6pd	pkma	0.938
pld1a	pisd	0.938
egfra	erbb3b	0.937
actn1	fn1a	0.937
jak1	grb2a	0.937
galnt12	c1galt1c1	0.937
gnl3	pwp2h	0.937
sqstm1	prkci	0.937
pik3r1	kdr	0.937
amy2a	agla	0.937
uba52	cdc20	0.937
erbb3a	egfra	0.937
ptk2bb	itgav	0.937
arcn1b	sec22ba	0.936
hadh	aacs	0.936
stx5a	arcn1a	0.936
gnl3	mphosph10	0.936
msmo1	sigmar1	0.936
FDFT1	mvk	0.936
pcxbcb	hadh	0.936
psmc2	cdc6	0.936
itga1	itgb6	0.936
ugp2b	agla	0.936
col1a2	mmp2	0.936
NCKAP1L	arpcxb5b	0.936
fn1a	crk	0.936
araf	braf	0.936
sec22ba	arcn1a	0.936
nckap1	arpcxb5b	0.936
gpam	agpat2	0.936
acat2	aacs	0.935
cad	glula	0.935
hprt1	atic	0.935
cpa4	ela2l	0.935
prkcdb	prkcbb	0.935
eno3	pgam1a	0.935
pmvk	mvda	0.935
cyp51	sigmar1	0.935
rnf41	erbb3b	0.935
cul1a	psmd12	0.935
h6pd	pgls	0.935
rbm19	nifk	0.935
acadm	pcxbcb	0.935
vav3b	rhocb	0.935
tp53	esr1	0.934
pard3ab	uba52	0.934
pi4kaa	pik3c3	0.934
pik3r1	esr1	0.934
ahctf1	dhdh	0.934
ipmkb	minpp1b	0.934
lpcxbat3	pisd	0.934
cyfip1	arpcxb5b	0.934
g6pd	tktb	0.933
wdr43	gnl3	0.933
actn1	actb2	0.932
acacb	prkaa1	0.932
dhcr24	soat1	0.932
itga2.2	lama4	0.932
hadhab	hadh	0.932
wdr43	nop2	0.932
me1	ldha	0.932
cpt1aab	cpt2	0.932
g6pd	tpi1b	0.932
arpcxb5b	cyfip2	0.932
dlat	sucla2	0.932
ddx18	ppan	0.932
per2	cry-dash	0.932
copb2	stx5a	0.932
stag1a	stag2b	0.932
psmd8	cdc20	0.932
itpkb	itpk1a	0.932
pik3cb	kdr	0.932
aco2	sucla2	0.932
smc3	msh6	0.932
erbb3a	rnf41	0.932
pik3r1	jak1	0.931
gbf1	arcn1a	0.931
col1a1a	col1a1b	0.931
cad	glsb	0.931
jak1	pik3cd	0.931
atp1a1a.4	cdh17	0.931
fn1a	apoeb	0.931
hprt1	gda	0.931
actb2	nckap1	0.931
acadm	acat2	0.931
arcn1b	gbf1	0.931
fmnl2a	rhocb	0.93
ppp2ca	ppp2r5ea	0.93
fn1a	abl1	0.93
UGT8	ugcg	0.93
eif2s2	uba52	0.93
aoc1	sat1a.1	0.93
psmd8	nfkbiab	0.93
uba52	nfkbiab	0.93
lamc1	lama4	0.93
braf	arrb2b	0.93
ap2a1	sh3gl1b	0.93
pik3c3	rab5ab	0.93
smurf2	bmpr2b	0.93
bmpr2a	smurf2	0.93
pik3cd	grb2a	0.93
pik3cb	grb2a	0.93
rars	larsb	0.93
sucla2	uqcrc2b	0.93
pard3abbb	prkci	0.93
tpi1b	tktb	0.929
tbcb	smc3	0.929
acss2	dlat	0.929
hprt1	impdh1b	0.929
pwp2h	ppan	0.929
igf1rb	grb2a	0.929
ikbkg	ripk2	0.929
NCKAP1L	abl1	0.929
ret	pik3cd	0.929
arpcxb5b	arrb2b	0.929
insra	grb2a	0.929
igf1ra	grb2a	0.929
pik3cb	ret	0.929
ido1	cyp1a	0.928
actb2	rhocb	0.928
itgb1a	lama4	0.928
cyb5a	cyp1a	0.928
sgpp1	degs2	0.928
psmd12	nfkbiab	0.928
tktb	pgd	0.928
cpt2	cpt1aa	0.928
egfra	cbl	0.928
sec61b	rpl23a	0.928
psmd1	cul1a	0.928
pik3c3	prkaa1	0.928
sirt1	foxo1a	0.927
degs2	asah2	0.927
ikbkg	map2k7	0.927
g6pd	pgam1a	0.927
dimt1l	rrs1	0.927
eno3	pkma	0.927
epn2	sh3gl1b	0.927
nop2	mybbp1a	0.926
cbl	jak1	0.926
aco2	sdha	0.926
araf	fn1a	0.926
minpp1b	itpk1a	0.926
pwp2h	mybbp1a	0.926
cyp1b1	ido1	0.926
pik3c2a	pi4k2a	0.926
cul1a	smurf2	0.926
gnl3	mybbp1a	0.926
psmc4	nfkbiab	0.925
acacb	acat2	0.925
ehmt1a	tp53	0.925
col6a2	col1a1b	0.925
inpp5d	grb2a	0.925
acaca	dlat	0.925
uba52	tp53	0.925
mapk8b	map2k7	0.925
arcn1b	uso1	0.925
hadhb	acat2	0.925
crk	grb2a	0.925
entpd1	atic	0.925
acaca	acat2	0.925
entpd6	atic	0.924
uso1	arcn1a	0.924
pcxbcb	hadhb	0.924
ehmt2	uba52	0.924
cyfip1	abl1	0.924
araf	arrb2b	0.924
ptk2bb	kdr	0.924
abl1	cyfip2	0.924
ehmt1a	uba52	0.924
epn2	waslb	0.924
dusp1	nfkbiab	0.924
kdr	itgav	0.924
pik3c3	rab5b	0.924
me1	pdha1a	0.923
uba52	rnf41	0.923
agpat2	pld1a	0.923
fdps	nsdhl	0.923
mpi	gmppb	0.923
chrm2a	sst1.1	0.923
cyp7a1	cyp1a	0.923
psmd11b	nfkbiab	0.923
epn2	uba52	0.923
NCKAP1L	crk	0.923
chrm2a	igf2r	0.923
yars	vars2	0.923
cul1a	nfkbiab	0.923
copb1	sec22ba	0.923
p4ha1b	col1a1a	0.922
smpd2a	UGT8	0.922
pwp2h	gtpbp4	0.922
mpi	pfkpa	0.922
fn1a	grb2a	0.922
bco1	aldh1a2	0.922
mpi	pfkfb3	0.922
gpd2	gpam	0.922
aldh1a2	bco1l	0.922
cyp7a1	cyp3a65	0.922
cyfip1	crk	0.922
wdr43	ppan	0.921
col6a1	plod2	0.921
actb2	fmnl2a	0.921
pkmb	tktb	0.921
card11	nfkbiab	0.921
postnb	mmp2	0.921
cul1a	psmc2	0.921
cul1a	ikbkg	0.921
ahctf1	pds5b	0.921
arfgap2	uso1	0.921
erbb2	rnf41	0.921
gosr2	arcn1a	0.92
actb2	NCKAP1L	0.92
nfkbiab	psmc2	0.92
pds5b	cdc20	0.92
cyp1b1	cyp1a	0.92
itgb1a	thbs1b	0.92
smc3	ppp2r5ea	0.92
smpd5	ugcg	0.92
col6a1	col1a1b	0.92
gosr2	arcn1b	0.92
EPT1	pld1a	0.92
hprt1	impdh2	0.919
mybbp1a	mphosph10	0.919
bco1l	aox6	0.919
erbb2	rhocb	0.919
acss2	pcxbcb	0.919
pikfyve	pip4k2aa	0.919
acacb	dlat	0.919
pi4kaa	pi4k2b	0.919
bco1	aox6	0.919
entpd4	entpd6	0.919
ikbkg	map3k8	0.919
pik3cd	pip5k1bb	0.919
prkcz	prkci	0.919
yars	abcf1	0.919
nol6	mybbp1a	0.919
cul1a	rnf41	0.918
pcxb	dlat	0.918
pi4k2a	pi4kaa	0.918
cyfip1	cyfip2	0.918
copb1	pld1a	0.918
notch1a	lfng	0.918
man1a1	ganab	0.918
smpd1	UGT8	0.918
kdr	mapk12a	0.918
pld1a	cds1	0.918
plod2	col1a1b	0.918
abl1	mapk12a	0.918
cyp3a65	aox6	0.918
fdps	msmo1	0.917
grk4	arrb2b	0.917
tp53	psmd11b	0.917
g6pd	pdha1a	0.917
mcm5	msh6	0.917
prkcdb	prkcz	0.917
skp2	smurf2	0.917
smurf2	cdc20	0.917
g6pd	pkmb	0.917
pik3c2a	waslb	0.917
actb2	cyfip1	0.917
ap2a1	waslb	0.917
prkcz	prkcbb	0.917
prkaa1	tp53	0.917
tktb	pgam1a	0.916
gpam	agpat9l	0.916
orc1	psmc2	0.916
bcar1	kdr	0.916
fgd1	rhocb	0.916
h6pd	eno3	0.916
cry1a	nr1d2b	0.916
orc1	cul1a	0.916
copb1	stx5a	0.916
itga2.2	lamc1	0.915
mpi	pfkfb2a	0.915
uso1	csnk1db	0.915
actb2	cyfip2	0.915
h6pd	pgam1a	0.915
mpi	pfkfb4al	0.915
col6a2	plod2	0.915
prkacaa	igf1rb	0.915
apcxb	ppp2r5ea	0.915
adcy7	adcy6a	0.915
mpi	pfkfb4a	0.915
prkacaa	igf1ra	0.915
vps28	uba52	0.915
cd36	itgav	0.915
smurf2	psmc2	0.915
prkacba	igf1ra	0.915
ap2a1	grb2a	0.915
gng12a	lpar1	0.915
cyfip1	grb2a	0.915
psmd1	nfkbiab	0.915
igf1rb	prkacba	0.915
cry-dash	cry1a	0.915
lpcxbat3	ptdss2	0.915
cyfip2	grb2a	0.915
cbl	pik3cd	0.915
itga2.2	lama5	0.915
hspd1	pitrm1	0.914
mvda	cyp51	0.914
gng12a	adcy6a	0.914
elf3	prkci	0.914
vav3b	kdr	0.914
pik3cb	cbl	0.914
psmc2	hif1ab	0.914
sf3b3	papola	0.914
cmpk2	entpd1	0.914
vegfab	bcar1	0.914
cul1a	psmd8	0.914
psmd1	smurf2	0.914
pik3c2a	pi4k2b	0.914
igf2r	arrb2b	0.914
fn1a	actn4	0.914
ptdss2	ptdss1a	0.914
myh9b	arpcxb5b	0.914
crebbpa	notch1b	0.913
rrs1	nop16	0.913
pik3cb	jak1	0.913
col1a2	p4ha1b	0.913
sqstm1	nfkbiab	0.913
eno3	pkmb	0.913
nckap1	grb2a	0.913
cbl	sh3gl1b	0.913
vegfab	itgav	0.913
ctnna1	actn4	0.913
smc3	mcm5	0.913
mphosph10	csnk1db	0.913
smpd5	UGT8	0.913
mvda	msmo1	0.913
dhdh	cdc20	0.913
kif17	kif3b	0.913
uba52	sec61b	0.913
ctnna1	abl1	0.913
gng12a	HTR4	0.913
sec61b	rpl18a	0.913
psmc4	cdc20	0.913
acadm	acss2	0.913
nrg1	rnf41	0.913
ugcg	plpp2a	0.913
hk2	pmm2	0.913
tubb5	csnk1db	0.913
gng12a	adrb3b	0.913
h6pd	tktb	0.912
arfgap2	arcn1b	0.912
psmc2	cdc20	0.912
arfgap2	arcn1a	0.912
cdc20	cdc25b	0.912
diaph2	cdc20	0.912
cyp3a65	aldh1a2	0.912
numb	prkci	0.912
pard3ab	numb	0.912
pds5b	ppp2r5ea	0.912
tp53	psmc4	0.912
pld1a	cd36	0.911
egfra	psen2	0.911
PTAFR	itgb2	0.911
cul1a	uba52	0.911
ahctf1	ppp2r5ea	0.911
lipg	mgll	0.911
arpcxb5b	grb2a	0.911
arcn1b	arcn1a	0.911
UGT8	plpp2a	0.911
crk	cyfip2	0.911
g6pd	ldha	0.911
psmd1	hif1ab	0.91
pafah1b1b	DYNC1H1	0.91
apcxb	psmd11b	0.91
nr1d1	arntl1a	0.91
skp2	psmd11b	0.91
pik3c2a	pi4kaa	0.91
rpl34	sec61b	0.91
pwp2h	larsb	0.91
aldh1a2	cyp1a	0.91
stag2b	cdc20	0.91
smurf2	psmc4	0.91
sh3gl1b	waslb	0.91
smurf2	rnf41	0.91
ap2a1	arrb2b	0.91
prkaa1	pik3r4	0.91
gpd2	agpat9l	0.909
pld1a	ptdss1a	0.909
gpd2	gpat4	0.909
ptdss2	pld1a	0.909
ahctf1	stag2b	0.909
vcla	braf	0.909
cbl	waslb	0.909
ahctf1	smc3	0.909
stx5a	csnk1db	0.909
cul1a	psmc4	0.909
epn2	pik3c2a	0.909
pik3c2a	inpp5d	0.908
cul1a	apcxb	0.908
cd36	itgb2	0.908
ggt1b	lap3	0.908
stag2b	ppp2r5ea	0.908
cul1a	LTN1	0.908
psmc4	hif1ab	0.908
epn2	arrb2b	0.908
smurf2	LTN1	0.908
serp1	tram1	0.908
cul1a	lmo7a	0.908
h6pd	pdha1a	0.908
prkcz	uba52	0.908
vav3b	NCKAP1L	0.908
tp53	psmc2	0.908
atp6v1aa	insra	0.908
vcla	arrb2b	0.908
chrm2a	arrb2b	0.907
notch2	notch1b	0.907
nifk	rpl18a	0.907
ahctf1	dync1li2	0.907
vav3b	crk	0.907
lpcxbat3	ptdss1a	0.907
acadm	acadvl	0.907
sec22ba	csnk1db	0.907
ap2a1	arpcxb5b	0.907
nrg1	grb2a	0.907
sh3gl1b	chrm2a	0.907
actb2	grb2a	0.907
vcla	cyfip1	0.907
psmd11b	cdc20	0.907
rack1	sec61b	0.907
minpp1b	pgam1a	0.907
psmd11b	hif1ab	0.907
prpf8	papola	0.907
mtor	pik3r1	0.907
pik3c2a	cbl	0.906
nckap1	vav3b	0.906
gosr2	csnk1db	0.906
dhdh	ppp2r5ea	0.906
NCKAP1L	grb2a	0.906
tubb4b	tuba8l4	0.906
snrnp200	papola	0.906
nme7	tubb5	0.906
mgll	cel.2	0.906
uba52	cdc25b	0.906
tubb5	tuba8l4	0.906
jun	tp53	0.906
srp54	rack1	0.906
ahctf1	stag1a	0.906
cdc42l	waslb	0.906
agpat2	cd36	0.906
orc1	psmd8	0.906
p4ha1b	col1a1b	0.906
fn1a	itgb6	0.906
col6a1	p4ha1b	0.906
stag1a	cdc20	0.906
vegfab	pik3r1	0.906
ugt1a1	aldh1a2	0.906
wdr43	csnk1db	0.906
itga1	vcla	0.906
rras2	pik3cg	0.906
ugt1a1	aox6	0.906
col5a2a	col1a1b	0.906
arpcxb5b	m6pr	0.906
gbf1	sec22ba	0.905
psmd1	cdc20	0.905
pik3cb	vegfab	0.905
psmd12	cdc6	0.905
dync1li2	cdc20	0.905
hspd1	grpel1	0.905
bmpr2a	bmpr2b	0.905
psmd1	tp53	0.905
apoeb	lamc1	0.905
chrm2a	grb2a	0.905
vav3b	pik3r1	0.905
smurf2	psmd8	0.905
psmd12	cdc20	0.905
tbcb	cdc20	0.905
pik3cb	pik3cd	0.905
cyp3a65	hsd17b12b	0.905
epn2	cbl	0.905
nle1	ddx18	0.905
vegfab	mapkapk2a	0.905
gng12a	adcy7	0.905
actb2	ddb2	0.905
smurf2	lmo7a	0.905
dync1i2b	pds5b	0.904
nckap1	bcar1	0.904
egfra	erbb2	0.904
psmd12	tp53	0.904
gng12a	chrm2a	0.904
rnf41	lmo7a	0.904
lpar1	sst1.1	0.904
psmd12	skp2	0.904
hsd17b12b	cyp1a	0.904
dync1i2b	stag1a	0.904
psmc4	cdc25b	0.904
ehmt2	ehmt1a	0.904
psmd1	orc1	0.904
sh3gl1b	arpcxb5b	0.904
ap2a1	chrm2a	0.904
smurf2	psmd11b	0.904
srp68	rack1	0.904
vegfab	ptk2bb	0.904
actn1	thbs1b	0.904
ap2a1	pik3c2a	0.904
PTAFR	lpar1	0.904
tp53	cdc20	0.904
cyp1b1	hsd17b12b	0.904
psmd12	hif1ab	0.903
pik3c2a	uba52	0.903
prlra	ghra	0.903
pik3cb	vav3b	0.903
skp2	psmc4	0.903
apcxb	psmc4	0.903
entpd1	impdh2	0.903
vegfab	actn4	0.903
bcar1	cyfip1	0.903
dync1i2b	tubb5	0.903
pld1a	itgb2	0.903
rras2	braf	0.903
skp2	psmc2	0.903
h6pd	mvda	0.903
orc1	psmc4	0.903
rdh12	aox6	0.903
cyfip1	kdr	0.903
numb	notch1b	0.903
psmc2	cdc25b	0.903
kdr	mapkapk2a	0.903
entpd1	impdh1b	0.903
cul1a	map3k8	0.903
epn2	grb2a	0.903
skp2	rnf41	0.903
aox6	cyp1a	0.903
araf	rras2	0.903
pik3c2a	arrb2b	0.903
pwp2h	csnk1db	0.903
lpar1	chrm2a	0.903
dimt1l	nop2	0.903
cul1a	ppp2r5ea	0.902
orc1	psmd12	0.902
ap2a1	cbl	0.902
cbl	arrb2b	0.902
nckap1	NCKAP1L	0.902
psmd12	smurf2	0.902
vav3b	cyfip2	0.902
hprt1	entpd4	0.902
ahctf1	cdc20	0.902
psmd1	ppp2r5ea	0.902
itga1	tpma	0.902
psmd12	ppp2r5ea	0.902
pld1a	itgav	0.902
ahr2	cyp1b1	0.902
dync1li2	ppp2r5ea	0.902
nckap1	kdr	0.902
dync1i2b	nme7	0.902
uba52	lmo7a	0.902
pkma	pgam1a	0.902
araf	vcla	0.902
psmd1	cdc25b	0.902
agpat2	itgb2	0.902
psmd11b	ppp2r5ea	0.902
pdxkb	aox6	0.902
dync1i2b	smc3	0.902
psmd11b	cdc6	0.902
pkmb	entpd1	0.902
sh3gl1b	igf2r	0.902
uba52	mcm2	0.902
dync1li2	smc3	0.902
p4ha1b	col6a2	0.902
dhdh	dync1li2	0.902
chkb	chka	0.902
bcar1	NCKAP1L	0.902
dync1i2b	cdc20	0.902
erbb3a	erbb3b	0.902
fn1a	arrb2b	0.902
pds5b	dync1li2	0.902
psmd11b	cdc25b	0.902
vegfab	crk	0.902
dync1i2b	stag2b	0.902
pik3c2a	arpcxb5b	0.902
vav3b	cyfip1	0.902
cpa5	amy2a	0.902
psmd1	cdc6	0.902
lpar1	pik3r1	0.902
pikfyve	pik3r1	0.902
igf2r	grb2a	0.902
vcla	aoc1	0.902
stag1a	dync1li2	0.902
tbcb	ppp2r5ea	0.902
pkma	entpd1	0.902
afdna	ctnna1	0.902
dync1i2b	ppp2r5ea	0.902
uba52	arpcxb5b	0.902
NCKAP1L	kdr	0.902
uba52	grb2a	0.902
UGT8	asah2	0.902
psmc4	ppp2r5ea	0.902
ywhaqa	baxa	0.902
cyfip1	prss1	0.902
psmd12	cdc25b	0.902
psmc4	cdc6	0.902
ppp2r5ea	psmc2	0.902
LTN1	cdc20	0.902
epn2	igf2r	0.902
copb1	itgb2	0.902
stag1a	ppp2r5ea	0.902
psmd1	skp2	0.902
arrb2b	waslb	0.902
stag2b	dync1li2	0.902
rxraa	pdha1a	0.901
uba52	arrb2b	0.901
ikbkg	rack1	0.901
rpl4	gtpbp4	0.901
prlra	cul1a	0.901
skp2	LTN1	0.901
vegfab	mapk12a	0.901
vav3b	ctnna1	0.901
tbcb	dhdh	0.901
pik3c2a	igf2r	0.901
actn4	thbs1b	0.901
sh3gl1b	grb2a	0.901
nol6	csnk1db	0.901
rnf41	cdc20	0.901
psmd1	apcxb	0.901
psmd8	cdc6	0.901
nfatc2a	jun	0.901
psmd8	ppp2r5ea	0.901
gng12a	pik3cg	0.901
PTAFR	pld1a	0.901
bcar1	cyfip2	0.9
vegfab	nckap1	0.9
stag2b	tbcb	0.9
hprt1	entpd6	0.9
actb2	xpcxb	0.9
apcxb	psmc2	0.9
gosr2	ins	0.9
ins	stx5a	0.9
chrm2a	arpcxb5b	0.9
rras	pik3cg	0.9
PTAFR	copb1	0.9
ahctf1	diaph2	0.9
uba52	xpcxb	0.9
nrg1	pik3r1	0.9
ppardb	dlat	0.9
uba52	erbb3b	0.9
diaph2	ppp2r5ea	0.9
pik3c2a	chrm2a	0.9
vegfab	vav3b	0.9
erbb3a	uba52	0.9
dync1i2b	dhdh	0.9
skp2	lmo7a	0.9
rnf41	LTN1	0.9
copb1	ins	0.9
chrm2a	m6pr	0.9
gng12a	pik3r1	0.9
uba52	ppp2r5ea	0.9
cbl	m6pr	0.9
vps37a	uba52	0.9
sh3gl1b	m6pr	0.9
sh3gl1b	uba52	0.9
epn2	arpcxb5b	0.9
arrb2b	grb2a	0.9
p4ha1b	lap3	0.9
ins	copb2	0.9
ahctf1	dync1i2b	0.9
nme7	csnk1db	0.9
pik3c2a	sh3gl1b	0.9
vegfab	cyfip1	0.9
stag1a	tbcb	0.9
map3k8	uba52	0.9
psmd8	hif1ab	0.9
lmo7a	cdc20	0.9
lmo7a	LTN1	0.9
PTAFR	gng12a	0.9
uba52	hif1ab	0.9
igf2r	uba52	0.9
apcxb	psmd8	0.9
sh3gl1b	arrb2b	0.9
ahctf1	tbcb	0.9
egfra	uba52	0.9
ins	grb2a	0.9
agpat2	itgav	0.9
ins	gbf1	0.9
cyfip1	pdxkb	0.9
uba52	mcm3	0.9
cbl	chrm2a	0.9
PTAFR	pik3r1	0.9
uba52	waslb	0.9
pik3c2a	m6pr	0.9
adrb3b	HTR4	0.9
gng12a	sst1.1	0.9
cbl	il6r	0.9
ctnna1	mapk12a	0.9
chrm2a	uba52	0.9
dhcr24	cel.2	0.9
arrb2b	m6pr	0.9
skp2	psmd8	0.9
ins	arcn1a	0.9
ddb2	uba52	0.9
ins	uso1	0.9
mgat4a	fn1a	0.9
ap2a1	m6pr	0.9
uba52	m6pr	0.9
hadh	aox6	0.9
orc1	uba52	0.9
cbl	arpcxb5b	0.9
ppardb	pdha1a	0.9
epn2	chrm2a	0.9
vegfab	NCKAP1L	0.9
psmd12	apcxb	0.9
nrg1	uba52	0.9
pip5k1ba	pip5k1bb	0.9
EPT1	UGT8	0.9
kdr	cyfip2	0.9
tp53	psmd8	0.9
itpr1ba	itpr1b	0.9
diaph2	dync1i2b	0.9
igf2r	arpcxb5b	0.9
epn2	m6pr	0.9
rxraa	dlat	0.9
pds5b	tbcb	0.9
vegfab	cyfip2	0.9
arfgap2	ins	0.9
uba52	cdc6	0.9
ins	copg2	0.9
cyfip1	aoc1	0.9
chrm2a	waslb	0.9
aoc1	pdxkb	0.9
hprt1	entpd1	0.9
ap2a1	prkcbb	0.9
ap2a1	uba52	0.9
uba52	mcm4	0.9
diaph2	dync1li2	0.9
dync1i2b	tbcb	0.9
tbcb	dync1li2	0.9
mgat4a	lamc1	0.9
m6pr	grb2a	0.9
m6pr	waslb	0.9
ins	atp6v1aa	0.9
orc1	psmd11b	0.9
cbl	igf2r	0.9
vcla	pdxkb	0.9
ins	arcn1b	0.9
diaph2	tbcb	0.9
mgat4a	apoeb	0.9
igf2r	waslb	0.9
dync1i2b	csnk1db	0.9
uba52	apcxb	0.9
neu3.3	UGT8	0.9
erbb2	uba52	0.9
actn1	vegfab	0.9
skp2	uba52	0.9
FDFT1	dhdds	0.899
diaph2	rhocb	0.898
dimt1l	ddx18	0.898
myh7	tpma	0.897
sc5d	tm7sf2	0.897
mapk8b	crk	0.897
jun	map2k7	0.897
mapk13	jun	0.897
mapk13	cdc25b	0.896
mapk12a	cdc25b	0.896
nle1	pwp2h	0.896
actn1	ctnna1	0.896
rab11fip2	rab11al	0.895
PDE3B	copb1	0.895
dimt1l	pwp2h	0.894
pcxb	got2a	0.894
acss2	hadhb	0.894
st3gal5	b4galt6	0.894
prss1	cpa4	0.893
itga2.2	itgb6	0.893
eno3	tpi1b	0.893
nr1d2b	tefa	0.893
agpat2	cds1	0.892
lss	mvk	0.892
lap3	got2a	0.891
actb2	actn4	0.891
pik3c2a	pik3r1	0.891
ela2	cel.2	0.891
cd36	thbs1b	0.891
aclya	hadhb	0.891
pik3cb	rras2	0.89
col6a1	mmp2	0.89
grpel1	hspa4a	0.89
nle1	nop2	0.89
lrrfip1a	flii	0.89
idi1	mvk	0.89
per2	nr1d1	0.89
notch2	lfng	0.889
mapk8b	fosab	0.889
h6pd	ldha	0.889
rab11fip2	ehd1b	0.889
eno3	gapdhs	0.889
jun	mapk12a	0.887
sirt1	srebf1	0.887
acacb	cpt1aa	0.887
c1galt1c1	galnt6	0.887
wdr43	nle1	0.887
acaca	prkaa1	0.887
araf	rras	0.887
sc5d	sigmar1	0.887
egfra	crk	0.887
rpl23a	gtpbp4	0.886
notch1a	psen2	0.886
eno3	g6pd	0.886
smc1b	pds5b	0.885
nsdhl	sigmar1	0.885
iqgap2	cdc42l	0.885
pik3c3	pik3r1	0.884
rrs1	rpl4	0.884
rpl4	nifk	0.883
ppan	mybbp1a	0.883
per3	arntl1a	0.883
kmt2a	ash1l	0.883
aco2	ndufs1	0.881
prpf8	polr2b	0.881
rrs1	rbm19	0.88
sec61b	rps27.1	0.88
acss2	pcxb	0.88
nr1d1	per3	0.879
gnl3	rpl23a	0.879
hk2	tktb	0.879
tnnt2a	myh7	0.879
pik3cb	rras	0.879
dimt1l	gtpbp4	0.878
lars2	larsb	0.878
mtor	tp53	0.877
nop2	rbm19	0.877
MAP3K13	map2k7	0.877
c1galt1b	galnt6	0.877
cpb1	pdia2	0.875
dimt1l	rbm19	0.875
nr1d1	per1a	0.875
gnl3	ppan	0.875
dhcr24	sqlea	0.875
adpgk	hk2	0.874
acss2	hadh	0.874
actb2	ctnna1	0.874
dot1l	kmt5b	0.874
FDFT1	acat2	0.874
srp54	rps27.1	0.873
srp54	rps27.2	0.873
asns	yars	0.873
col5a2a	postnb	0.873
c6ast3	amy2a	0.873
prkar1aa	prkacaa	0.872
tp53	mapk12a	0.872
cel.2	cpa5	0.872
pdha1a	tktb	0.871
ldha	tktb	0.871
rps27.2	sec61b	0.871
cyp7a1	hmgcra	0.871
psmc2	rpl23a	0.871
gapdhs	pgam1a	0.87
eif4e1c	cyfip1	0.87
eif4e1c	cyfip2	0.87
hipk3a	tp53	0.869
h6pd	rbks	0.869
adam17a	notch1a	0.869
pfas	cad	0.869
cdc6	cdc25b	0.869
nol6	gtpbp4	0.868
rbm19	gtpbp4	0.868
mvda	aacs	0.867
pwp2h	nop16	0.867
fdps	mvk	0.866
adrb3b	gnas	0.866
lpcxbat3	plpp2a	0.866
aspm	mcm5	0.866
pik3cb	pip5k1bb	0.866
ugp2b	gys1	0.866
nle1	rpl23a	0.865
cpa4	amy2a	0.865
prss1	cel.2	0.865
smpd2a	asah2	0.865
notch2	adam17a	0.865
hspa4a	hspa9	0.864
mvda	nsdhl	0.864
rps27.1	eef1a1l1	0.864
sirt1	arntl1a	0.863
adam17a	notch1b	0.863
rab11fip2	myo5b	0.863
cry-dash	nr1d2b	0.863
agpat2	gpat4	0.862
fdps	sqlea	0.862
c6ast3	ela3l	0.861
cry1a	ddb2	0.861
rars	tars	0.861
nsdhl	tm7sf2	0.861
nle1	nol6	0.861
rps27.2	rps27.1	0.86
c6ast3	ela2l	0.86
acadvl	hadh	0.86
lss	sigmar1	0.859
fdps	hmgcra	0.859
acacb	sucla2	0.859
acaca	sucla2	0.859
acadm	sucla2	0.858
tm7sf2	sigmar1	0.858
kdr	pik3cd	0.858
vcla	pip4k2aa	0.858
fdps	acat2	0.858
mtor	pik3cd	0.858
zak	map2k7	0.858
pik3cb	mtor	0.858
rb1	abl1	0.857
sc5d	sqlea	0.857
cdc42l	kdr	0.857
cdc42l	fgd1	0.856
aclya	acat2	0.856
wdr43	dimt1l	0.856
hmgcra	srebf1	0.855
farsa	larsb	0.855
hk2	pfkfb3	0.854
notch1a	kdrl	0.854
prkar1aa	prkacba	0.853
psmc4	rpl23a	0.853
psmd1	rack1	0.853
actn1	lmo7a	0.852
actn4	lmo7a	0.852
cpt1aa	hadhb	0.851
acss2	pdha1a	0.851
lpar1	gnai1	0.851
uba52	usp14	0.85
lss	tm7sf2	0.85
hadhb	sucla2	0.849
ins	igf1ra	0.848
ywhaz	cdc25b	0.848
ywhaqa	cdc25b	0.848
gnl3	rbm19	0.848
ins	igf1rb	0.848
vps4b	vps28	0.847
smpd1	asah2	0.847
acss2	sucla2	0.847
immt	uqcrc2b	0.847
mapk13	tp53	0.846
cbl	insra	0.845
prkcdb	mapk8b	0.845
UGT8	galcb	0.845
coasy	atic	0.845
FDFT1	sigmar1	0.844
immt	ndufs1	0.844
aclya	got2a	0.844
pla2g6	pld1a	0.843
tubb5	DYNC1H1	0.843
cyp7a1	soat1	0.842
acadm	asah2	0.842
prkaa1	prkacba	0.841
acadvl	asah2	0.841
vcla	pikfyve	0.84
bcat1	ldha	0.84
fdps	tm7sf2	0.84
bcat2	ldha	0.84
nle1	rbm19	0.84
per2	arntl1a	0.84
per1a	arntl1a	0.84
hk2	ldha	0.839
ppardb	rxrgb	0.839
prkacaa	prkaa1	0.838
per2	per3	0.838
srp54	yars	0.838
nol6	ppan	0.837
bcat2	coasy	0.837
nle1	ppan	0.837
rasgrp3	rras2	0.837
pkma	tpi1b	0.837
cyp7a1	dhcr24	0.836
jun	jdp2b	0.836
cyfip1	eif4e2rs1	0.836
gnaia	lpar1	0.835
agpat2	agpat9l	0.835
bcat1	coasy	0.834
per1a	per3	0.833
eif4e2rs1	cyfip2	0.833
sucla2	acat2	0.832
mcm2	msh6	0.832
per1b	per3	0.832
npas2	arntl1a	0.832
uba52	eef1a1l1	0.829
cdc20	mcm3	0.829
tp53	notch1a	0.829
tpi1b	pgam1a	0.828
inpp5d	pik3cg	0.828
srp68	rps27.1	0.828
pfkfb3	pfkpa	0.828
sqlea	sigmar1	0.828
hadhb	dlat	0.828
srp68	rps27.2	0.828
notch2	psen2	0.828
dgat2	lipg	0.827
rras2	arhgef6	0.826
aldh1a2	aox6	0.826
pcxbyt2	pisd	0.826
vcla	cdc42l	0.826
galnt12	c1galt1b	0.825
per1b	arntl1a	0.825
vcla	pip5k1bb	0.825
rars	farsb	0.825
entpd1	entpd6	0.824
kmt2a	crebbpa	0.824
rdh12	bco1	0.824
rras	arhgef6	0.824
hmgcra	FDFT1	0.824
fdps	sc5d	0.823
idi1	sc5d	0.823
ddx18	mybbp1a	0.823
coasy	mvk	0.823
hk2	pfkpa	0.822
vars2	larsb	0.822
acss2	aox6	0.822
acadm	aox6	0.821
prss1	gapdhs	0.821
dimt1l	gnl3	0.821
mpi	pgd	0.82
mapk8b	dusp2	0.82
skp2	cdkn1bb	0.82
mknk1	mknk2a	0.82
afdna	lmo7a	0.82
cpt1aab	acacb	0.819
pi4k2a	sigmar1	0.819
aspm	cdc6	0.819
gnl3	nop16	0.819
pkma	nme7	0.818
nifk	rpl23a	0.818
pkmb	nme7	0.818
arid4a	gtpbp4	0.818
cdkn1bb	tp53	0.818
cry1a	npas2	0.818
skp2	cdc6	0.817
cyp7a1	cel.2	0.817
acss2	cd36	0.817
mdh1aa	sdha	0.817
rpl4	sec61b	0.817
rpl34	eef1a1l1	0.817
sirt1	dot1l	0.817
kdr	rpl23a	0.817
notch1b	psen2	0.816
nrg1	llgl2	0.816
nrg1	prkci	0.816
ikbkg	myd88	0.815
cry1a	nr1d1	0.815
dgat2	cel.2	0.815
vars2	tars	0.815
ap2a1	numb	0.814
stat1a	tlr3	0.814
arhgap35a	arhgap5	0.814
epn2	kdr	0.814
eno3	tktb	0.813
lss	aacs	0.813
farsb	larsb	0.813
itga1	flncb	0.813
pi4kaa	pip5k1bb	0.813
gpd2	agpat2	0.813
patj	prkci	0.812
ulk1b	ppp2ca	0.812
tpi1b	mdh1aa	0.811
dimt1l	nol6	0.811
mvda	sqlea	0.81
alas2	alas1	0.81
nr1d1	npas2	0.81
arpcxb5la	arpcxb5b	0.81
gng12a	fgd1	0.81
pcxbcb	aox6	0.81
dusp2	tp53	0.809
mapk13	mapkapk2a	0.809
crebbpa	creb3l3l	0.809
ap2a1	copg2	0.808
pi4k2a	pi4k2b	0.807
pkmb	polr2b	0.807
pkma	polr2b	0.807
ddb2	tp53	0.807
ldha	gapdhs	0.806
pik3r1	igf1ra	0.806
pik3r1	igf1rb	0.806
adpgk	g6pd	0.806
mgat4a	mgat4b	0.805
h6pd	minpp1b	0.805
adpgk	tktb	0.804
bco1	bco1l	0.804
agpat9l	gpat4	0.804
RPS6KA5	rps6ka4	0.804
tp53	hspa9	0.804
lipg	cel.2	0.804
vcla	pip5k1ba	0.804
h6pd	adpgk	0.804
prkacaa	prkacba	0.803
bcat2	bcat1	0.803
notch1b	lfng	0.803
idi1	dhcr24	0.803
cpt1aab	cpt1aa	0.803
itga1	fn1a	0.803
pkmb	pkma	0.803
ehd1b	ehd1a	0.803
numb	prkcz	0.803
impdh1b	impdh2	0.803
rab11fip2	ehd1a	0.802
acaca	acacb	0.802
eno3	mdh1aa	0.802
mat2ab	dnmt3aa	0.802
npas2	per3	0.802
pcxbcb	mmaa	0.802
tktb	minpp1b	0.801
nol6	rbm19	0.8
afdna	actb2	0.8
gnas	gnal	0.8
cdc42l	prkci	0.8
csnk1db	grk3	0.8
g6pd	minpp1b	0.8
fn1a	esr1	0.799
cpa5	pdia2	0.799
polr2b	nme7	0.799
tp53	abl1	0.799
birc6	rnf41	0.797
gdf6a	chrd	0.796
phkg2	pygb	0.796
acaca	dgat2	0.795
tp53	kdr	0.794
itga1	lama5	0.794
pkmb	tpi1b	0.793
hadhb	asah2	0.792
dhcr24	nsdhl	0.792
pik3c3	rptor	0.791
got2a	sdha	0.79
adcy7	gnas	0.789
adcy7	gnal	0.789
tp53	rb1	0.789
rps27.2	eef1a1l1	0.788
scrib	cdc42l	0.788
arpcxb5la	waslb	0.787
nop16	mphosph10	0.787
pip5k1bb	pik3cg	0.787
dhcr24	FDFT1	0.787
eif4e1c	mknk2a	0.786
eif4e1c	mknk1	0.786
mpi	gale	0.786
nop2	rpl4	0.786
gapdhs	tp53	0.786
dlat	sdha	0.785
tp53	axin1	0.785
itgb1a	flncb	0.785
hmgcra	lss	0.785
csnk1db	arntl1a	0.785
prkacaa	adcy7	0.784
adcy7	prkacba	0.784
adcy7	pde4ba	0.784
mapk8b	cdc42l	0.784
sqstm1	ulk1b	0.784
vegfab	igf1ra	0.784
cyp51	mvk	0.784
upp2	uck2a	0.784
vegfab	igf1rb	0.784
gys1	agla	0.784
acadm	ndufs1	0.783
kmt5b	ash1l	0.783
lpp	vcla	0.782
LTN1	rpl23a	0.781
gnpnat1	sat1a.1	0.781
acvr1l	chrd	0.78
msmo1	mvk	0.78
nop2	rpl18a	0.78
itgb1a	actn4	0.779
sirt1	mcm10	0.779
pi4kaa	pip5k1ba	0.779
kdrl	grb2a	0.779
kdr	grb2a	0.779
pkmb	gapdhs	0.779
nr1d1	per1b	0.778
aspm	mcm4	0.777
pfkpa	tktb	0.777
RPS6KA5	mapk13	0.777
RPS6KA5	mapk12a	0.776
pi4kaa	pik3r1	0.776
sgpp1	plpp2a	0.776
pard3ab	cdc42l	0.776
jun	stat1a	0.776
nr1d2b	per1b	0.775
mcm10	cdc20	0.774
pip4k2aa	pik3cg	0.774
MAP3K13	mycbp2	0.773
flnca	itgb1a	0.773
FDFT1	tm7sf2	0.772
polr2b	rpl23a	0.772
gdf6a	bmpr2b	0.772
gdf6a	bmpr2a	0.772
tubb4b	DYNC1H1	0.772
actb2	arpcxb5la	0.772
actn1	itgb1a	0.771
itgb6	lama5	0.77
mapk8b	sirt1	0.77
hspd1	sdha	0.77
per2	per1a	0.769
pikfyve	pik3r4	0.769
fn1a	col1a1a	0.769
actn1	itga5	0.768
rars	lars2	0.768
acadvl	sdha	0.768
per2	per1b	0.767
yars	rpl4	0.767
pi4k2b	pip5k1bb	0.767
mvda	hmgcra	0.767
itga2.2	fn1a	0.766
itgb6	flncb	0.766
itga1	flnca	0.766
ikbkg	tlr3	0.766
tuba8l4	DYNC1H1	0.765
crebbpa	stat1a	0.765
sirt1	jun	0.765
fdps	sigmar1	0.765
rrs1	rpl23a	0.765
sirt1	crebbpa	0.764
orc1	cdc20	0.764
mapk13	rps6ka4	0.763
mtor	sirt1	0.763
tp53	mmp2	0.763
tp53	igf1rb	0.763
cpa4	cpa5	0.762
rasgrp3	rras	0.762
rps6ka4	mapk12a	0.762
h6pd	aco2	0.762
itga1	lama4	0.761
actb2	DYNC1H1	0.761
gnl3	rpl4	0.76
itga5	col1a1a	0.76
nr1i2	cyp3a65	0.76
braf	prkcbb	0.759
trdmt1	dnmt3aa	0.759
smpd1	galcb	0.758
myd88	stat1a	0.758
nr1d2b	per1a	0.758
c6ast3	cel.2	0.758
itga5	thbs1b	0.758
acaca	srebf1	0.758
itgb6	flnca	0.757
cpa4	cel.2	0.757
bcar1	vcla	0.757
actn1	itga1	0.756
sqlea	tm7sf2	0.756
pkma	pfkpa	0.756
bcar1	itgb1a	0.756
c6ast3	cpa5	0.756
adcy6a	pde10a	0.755
pdha1a	sdha	0.755
degs2	smpd2a	0.755
flnca	itga5	0.754
cmpk2	nme7	0.754
pik3cd	igf1ra	0.754
itgav	flncb	0.754
flnca	itgav	0.754
chst12a	csgalnact2	0.754
itga5	flncb	0.754
csf1rb	vegfab	0.753
smc3	cdc6	0.753
tp53	baxa	0.753
mapk8b	foxo1a	0.753
yars	eef1a1l1	0.752
fads2	acat2	0.752
ikbkg	mtor	0.752
prkacaa	adcy6a	0.752
mt-co1	sdha	0.752
adcy6a	prkacba	0.752
hk2	pfkfb2a	0.751
igf1rb	pik3cd	0.751
csf1rb	itgb2	0.751
pik3cb	igf1ra	0.751
mtor	jun	0.751
cpt1aa	acsl3b	0.751
sqstm1	mtor	0.751
c6ast3	cpa4	0.751
pik3cb	igf1rb	0.751
h6pd	gpd2	0.75
fn1a	postnb	0.749
ap2a1	copb1	0.749
c6ast3	prss1	0.748
cpa4	pdia2	0.748
smpd1	degs2	0.748
itga5	lama4	0.748
itga2.2	flncb	0.748
pdzk1	abcc2	0.748
itgav	thbs1b	0.747
bcar1	ptk2bb	0.747
idi1	acat2	0.747
fosab	esr1	0.746
lama5	itga5	0.746
rars	aldh1a2	0.746
rrs1	mybbp1a	0.746
gapdhs	eef1a1l1	0.746
p4ha1b	plod2	0.746
eno3	ldha	0.746
col6a1	col6a4a	0.746
sst1.1	fosab	0.745
hspd1	tars	0.745
nle1	dimt1l	0.745
yars	pcxbyt2	0.745
dgat2	plpp2a	0.744
adcy7	pde7a	0.744
rptor	rictorb	0.744
vegfab	hif1ab	0.743
inpp5d	pik3r1	0.743
mybbp1a	gtpbp4	0.743
dot1l	setd1ba	0.742
col1a2	fn1a	0.742
nop2	rpl23a	0.741
ikbkg	rptor	0.741
pik3c2a	pip5k1bb	0.741
mgat5	mgat2	0.74
fosab	mapk12a	0.74
rps6kb1a	ppp2ca	0.74
map2k7	fosab	0.74
adcy6a	pde4ba	0.74
itgb6	actn4	0.74
mapk13	fosab	0.74
actn4	itga5	0.74
mtor	pik3r4	0.739
itga2.2	flnca	0.739
sqstm1	pik3c3	0.739
pik3r1	kdrl	0.739
copb1	rras2	0.738
abcf1	mybbp1a	0.738
cpt1aa	hadh	0.738
pkmb	pgam1a	0.738
pi4k2a	pip5k1bb	0.738
pik3c2a	pip5k1ba	0.737
hmgcra	pisd	0.737
lama5	itgav	0.737
pfkfb4a	pfkpa	0.736
itgb2	itga5	0.736
scrib	llgl2	0.736
pfkfb2a	pfkpa	0.736
mcm2	smc3	0.736
pfkfb4al	pfkpa	0.736
g6pd	pcxb	0.735
kdr	notch1a	0.735
pde5ab	prkacba	0.735
prkacaa	pde5ab	0.735
gng12a	rras	0.734
ahcyl1	dnmt3aa	0.734
srebf1	cpt1aa	0.734
egfra	tp53	0.734
adrb3b	gnal	0.733
gapdhs	sdha	0.733
tp53	ptgs2b	0.733
nr1d1	csnk1db	0.733
PDE3B	rras2	0.732
hspd1	smpd2a	0.732
mtor	kdr	0.731
itgb6	lama4	0.731
pkma	polr2a	0.73
itgb1a	col1a1a	0.73
[truncated: 155 more rows]

## Sheet: log2FoldCchange-padj
gene	log2FoldChange	padj
aacs	1.8907	8.63e-16
abcc2	-1.4412	2.31e-07
abcf1	1.3265	0.001035
abcf2a	1.6601	9.38e-11
abl1	0.89832	0.002927
acaca	1.8056	2.15e-05
acacb	-0.06132	0.9587
acadm	0.44663	0.21904
acadvl	0.84174	1.11e-05
acat2	1.4276	1.31e-06
aclya	1.8547	4e-14
aco2	1.4844	2.36e-12
acsl3b	1.1971	3.47e-05
acsl4a	1.5316	4.62e-05
acss2	-0.5172	0.062744
actb2	0.075409	0.9587
actn1	1.1058	1.58e-06
actn4	1.4362	2.14e-13
acvr1l	1.5535	3.63e-06
adam17a	1.133	8.26e-05
adcy6a	-1.0583	0.004628
adcy7	1.1277	0.001442
adpgk	1.1102	0.000311
adrb3b	2.5363	0.000197
afdna	0.89659	0.020756
aff4	0.68397	0.03272
agla	0.72061	0.24004
agpat2	1.0013	7.46e-05
agpat9l	-0.47601	0.27914
ahctf1	1.9705	3.61e-07
ahcyl1	1.6779	3.35e-10
ahr2	2.0112	2.85e-10
alas1	1.3424	0.000961
alas2	1.1477	0.010885
aldh1a2	-0.05725	0.9587
amy2a	10.997	1.38e-12
aoc1	-1.31	0.002163
aox6	-0.35776	0.46495
ap2a1	1.4732	3.6e-15
apoeb	2.1069	9.98e-13
araf	1.2307	2.37e-05
arcn1a	1.5888	1.94e-08
arcn1b	1.6037	4.86e-10
arfgap2	1.0623	1.47e-08
arhgap35a	1.0086	8.19e-05
arhgap5	1.3353	0.000311
arhgef4	-1.1664	0.000802
arhgef6	1.0107	0.001355
arid4a	1.6615	1.09e-12
arntl1a	0.64244	0.083547
arrb2b	1.0994	0.000776
asah2	-2.4473	2.95e-12
ash1l	1.0946	0.001791
asns	1.5505	1.38e-06
aspm	-0.67758	0.33615
atic	0.20079	0.91748
atp1a1a.4	0.93474	0.001292
atp6v1aa	0.84825	0.000603
atp6v1ba	0.88067	2.37e-05
axin1	1.2869	1.15e-05
b4galt6	1.1665	0.011417
baxa	1.1795	3.04e-06
bcar1	0.96381	0.001345
bcat1	3.9888	0.000107
bcat2	-0.77643	0.046126
bco1	-1.0072	0.001247
bco1l	-0.16552	0.91754
birc6	-0.02772	0.9742
bmp2b	-1.2942	0.013222
bmpr2a	1.3091	0.003845
bmpr2b	1.4034	3.46e-05
braf	-0.12083	0.9587
c1galt1b	1.6219	4.52e-08
c1galt1c1	0.54189	0.17836
c6ast3	9.8169	3.32e-07
cad	1.6316	5.65e-06
card11	0.97642	0.000432
cbl	1.1723	1.81e-05
cbsb	-1.8257	3.64e-05
cd36	-1.5496	1.51e-06
cdc20	-1.6657	0.003925
cdc25b	-1.4917	2.94e-06
cdc42l	1.0503	2.29e-05
cdc6	-1.9074	0.000165
cdh17	0.058768	0.9587
cdkn1bb	-1.0777	0.052224
cds1	1.3038	2.67e-06
cel.2	6.9471	######
chka	0.92039	0.091512
chkb	1.4234	4.3e-06
chrd	1.2588	0.013807
chrm2a	1.8865	2.26e-05
chst12a	1.3258	0.044029
cltca	1.7066	4.21e-15
cmpk2	-1.3044	0.000676
coasy	-0.22749	0.85218
col1a1a	1.129	0.009483
col1a1b	1.0293	0.012778
col1a2	1.3919	0.000577
col5a2a	1.4708	8.67e-05
col6a1	1.0762	0.00443
col6a2	0.80923	0.03136
col6a4a	1.472	2.47e-09
copb1	0.93155	1.25e-05
copb2	1.0489	4.51e-07
copg2	0.75516	0.00168
cpa4	7.5693	1.58e-77
cpa5	5.2337	3.42e-39
cpb1	9.3967	1.57e-11
cpt1aa	0.7799	0.004682
cpt2	0.90922	0.003168
creb3l3l	1.0335	4.44e-05
crebbpa	-0.24237	0.83005
crk	0.72515	0.008129
cry1a	-1.0478	0.000209
cry-dash	-2.1775	0.000266
csf1rb	-1.3854	0.005127
csgalnact2	0.43625	0.72788
csnk1db	0.44111	0.47147
ctnna1	0.080254	0.9478
cul1a	0.21794	0.70965
cyb5a	1.0512	0.001472
cyfip1	1.9594	4.21e-11
cyfip2	1.8363	7.53e-07
cyp1a	1.626	9.69e-07
cyp1b1	3.0018	3.79e-11
cyp1c1	1.6781	1.25e-11
cyp3a65	-0.96942	7.99e-08
cyp51	1.0853	0.003731
cyp7a1	-1.7918	0.091606
cyp8b1	-1.988	1.5e-05
ddb2	-1.4972	0.00108
ddx18	1.1634	6.92e-05
degs2	1.0798	8.83e-05
dgat2	1.1788	0.005207
dhcr24	1.3057	6.46e-05
dhdds	1.3149	0.000253
DHDH	-0.81479	0.053568
diaph2	1.1628	7.87e-05
dimt1l	1.403	0.003616
dlat	1.2958	3.45e-10
dnm1l	0.95927	6.67e-06
dnmt3aa	1.5273	2.26e-09
dot1l	1.616	1.33e-06
dpm3	1.2776	0.000902
dusp1	-2.0305	9.05e-12
dusp2	-1.4325	3.33e-05
dync1h1	1.4688	1.83e-09
dync1i2b	1.4703	0.000233
dync1li2	1.8145	3.32e-15
ebp	1.3982	2.45e-05
eef1a1l1	-0.08877	0.9478
egfra	1.0141	0.012498
ehd1a	-0.01502	0.99827
ehd1b	0.38268	0.17558
ehmt1a	-0.56383	0.15747
ehmt2	-0.21444	0.90525
eif2b5	0.79135	0.079552
eif2s2	0.158	0.91313
eif4e1c	1.2407	3.58e-05
eif4e2rs1	-0.26608	0.69805
ela2	9.6715	1.86e-06
ela2l	9.1709	4.96e-08
ela3l	9.9429	3.06e-13
elf3	-1.9826	0.000538
ell	1.4658	7.5e-07
eno3	-0.19166	0.91313
entpd1	0.88875	0.00109
entpd4	1.7304	1.68e-08
entpd6	1.7644	5.39e-13
epn2	1.0752	0.000295
erbb2	0.91026	0.009244
erbb3a	0.2676	0.88171
erbb3b	0.037361	0.97657
esr1	1.5964	0.038918
etnk2	2.8046	4.7e-15
fads2	1.73	0.095954
farsa	1.1758	2.78e-07
farsb	1.01	0.000931
fdft1	1.688	7.62e-06
fdps	2.1676	9.12e-09
fgd1	1.7423	0.000292
flii	0.92692	0.001642
flnca	-0.6124	0.3407
flncb	0.76832	0.2262
fmnl2a	1.0397	0.001219
fn1a	1.165	0.016615
fosab	-2.8984	0.042392
foxo1a	1.0714	0.003698
foxp1a	-1.0798	0.045467
fut8a	-0.17495	0.87792
g6pd	1.5266	6.9e-09
galcb	1.4121	1.61e-11
gale	1.4718	3.6e-08
galnt12	1.6131	2.22e-05
galnt6	0.57795	0.20188
galt	1.0065	0.000358
ganab	0.41161	0.18565
gapdhs	-0.02114	0.97803
gbf1	1.4558	1.41e-08
gda	-0.46958	0.3139
gdf6a	-1.2513	0.005131
ggt1b	-1.6224	1.59e-05
ghra	1.9121	0.88668
glsb	1.4183	0.000312
glula	-0.89839	0.07206
gmppb	1.1062	2.24e-05
gnai1	1.3056	3.15e-06
gnaia	1.0443	5.05e-05
gnal	-0.40265	0.73569
gnas	0.96088	0.001668
gng12a	1.0461	0.001892
gnl3	0.84268	0.064038
gnpnat1	1.5677	8.65e-08
gosr2	1.1917	2.67e-05
got2a	0.85489	0.0095
gpam	1.4591	3.02e-08
gpat4	-1.3155	2.53e-06
gpd2	1.3675	3.51e-05
grb2a	-1.1752	5.9e-05
grk3	1.1751	9.24e-05
grk4	0.017477	0.99991
grpel1	1.9445	3.46e-13
gtpbp4	-0.00307	0.99991
gys1	0.64229	0.084507
h6pd	1.8371	3.04e-06
hadh	0.31805	0.45259
hadhaa	2.0762	7.56e-11
hadhab	1.0967	5.04e-05
hadhb	1.0919	4.11e-06
hif1ab	0.68614	0.00053
hipk3a	1.2448	0.000594
hk2	1.3571	0.000938
hmgcra	2.0586	2.95e-09
hprt1	2.2902	2.25e-13
hsd17b12b	1.1591	1.34e-06
hsd3b7	-0.03353	0.99991
hspa4a	2.2184	2.53e-13
hspa9	1.1486	5.61e-06
hspd1	1.6642	5.22e-07
htr4	1.0121	0.000102
idi1	1.5687	0.000261
ido1	1.5247	1.39e-07
igf1ra	1.7637	0.000255
igf1rb	1.906	6.63e-06
igf2r	1.8363	1.43e-10
ikbkg	0.84924	0.000417
il6r	1.5503	0.008721
immt	0.99113	3.72e-06
impdh1b	1.2774	6.55e-06
impdh2	0.37383	0.45296
inpp5d	1.4919	6.29e-10
ins	5.5753	1.38e-08
insra	0.49719	0.46605
ipmkb	1.486	2.88e-07
ippk	1.2414	0.014537
iqgap2	1.3266	1.2e-05
itga1	0.38376	0.65835
itga2.2	2.4793	2.74e-05
itga5	1.8547	0.00013
itgav	1.4929	7.05e-08
itgb1a	1.1588	0.020276
itgb2	1.3433	4.91e-09
itgb6	0.024411	0.99593
itpk1a	0.26205	0.72659
itpkb	1.1176	0.002418
itpr1b	1.3901	0.003964
jak1	0.83204	0.000187
jdp2b	-1.4184	0.026391
jun	-2.0325	8.32e-07
kdr	1.6269	1.66e-09
kdrl	1.4897	1.13e-09
kif17	-2.0832	0.011225
kif3b	1.0606	0.004488
kmt2a	0.97216	0.02389
kmt5b	0.26966	0.58223
lama4	0.88155	0.002601
lama5	0.45696	0.25561
lamc1	0.80561	0.089404
lap3	1.0405	0.001105
lars2	1.2684	0.002679
larsb	0.67987	0.1484
ldha	1.4411	7.05e-13
lfng	1.1241	0.015363
lipg	1.2228	0.014868
llgl2	0.52833	0.10806
lmo7a	1.0994	0.019708
lpar1	1.4211	0.002772
lpp	1.49	9.04e-08
lrrfip1a	0.8937	0.043893
lss	1.3313	9.57e-05
LTN1	1.5827	1.01e-08
m6pr	1.0634	0.002687
man1a1	1.0744	0.000706
map2k7	1.2559	0.005647
MAP3K13	1.5469	9.48e-05
map3k8	0.72501	0.10496
mapk12a	1.0881	9.6e-07
mapk13	1.0279	0.001013
mapk8b	1.249	0.000598
mapkapk2a	1.2027	1.84e-06
mat2ab	-1.4206	0.001678
mcm10	-1.0293	0.049703
mcm2	-1.3827	1.18e-05
mcm3	-0.86366	0.000762
mcm4	-1.2557	1.57e-06
mcm5	-1.3372	4.57e-08
mdh1aa	0.42024	0.27932
me1	1.6927	2.98e-11
mgat2	-1.0531	0.010766
mgat3b	1.8871	1.76e-06
mgat4a	1.3204	1.33e-06
mgat4b	0.23575	0.91491
mgat5	1.3491	0.009185
mgll	1.446	0.012444
minpp1b	1.3031	0.000823
mknk1	1.0483	0.005281
mknk2a	-0.30644	0.76757
mmaa	1.108	0.000753
mmab	1.3172	3.23e-05
mmp14a	1.1776	0.008947
mmp2	1.1426	0.002509
mphosph10	1.113	0.013479
mpi	1.8826	1.07e-15
msh6	-0.48276	0.47646
msmo1	1.0166	0.007242
mt-co1	-0.49222	0.027775
mtor	1.7879	2.83e-13
mvda	1.5098	8.45e-07
mvk	2.1598	1.84e-10
mybbp1a	1.2921	0.000114
mycbp2	2.0503	6.6e-16
myd88	1.3257	0.000459
myh7	-2.1106	0.3256
myh9b	0.81902	7.97e-05
myo5b	1.6995	8.33e-13
nckap1	1.0572	0.000252
NCKAP1L	1.6884	8.44e-05
ndufs1	1.0276	0.000109
neu3.3	-4.3484	8.74e-17
nfatc2a	1.0537	0.006194
nfkbiab	-1.2521	6.45e-12
nifk	0.75423	0.069009
nle1	1.0991	0.000261
nme7	0.20428	0.91226
nol6	1.03	7.39e-05
nop16	1.3448	5.57e-05
nop2	1.1332	0.001382
notch1a	1.0591	0.000303
notch1b	1.5569	0.001978
notch2	0.95151	0.0003
npas2	1.9121	1.07e-09
nr1d1	-1.6728	2.96e-05
nr1d2b	-1.1609	5.56e-05
nr1i2	-1.0123	0.003774
nrg1	-1.2905	0.030018
nsdhl	1.6002	2.3e-06
nsun5	0.47108	0.41766
numb	0.84815	0.009373
orc1	-0.46319	0.69064
p4ha1b	1.0939	0.002517
pafah1b1b	1.3389	2.32e-08
pank1b	1.117	0.000322
papola	0.48509	0.16934
pard3ab	0.94921	0.006223
patj	0.9384	0.074236
pcxb	4.1833	0.1209
pdcd6ip	1.1076	1.16e-06
pde10a	1.621	8e-05
pde3a	1.1451	0.028648
pde3b	1.347	2.65e-06
pde4ba	0.35515	0.71898
pde5ab	0.3893	0.52072
pde7a	1.1219	0.025205
pdha1a	1.0355	3.44e-05
pdia2	4.3713	3.79e-06
pds5b	-0.45719	0.30519
pdxkb	1.1477	0.00034
pdzk1	-1.148	0.017832
per1a	0.48195	0.27538
per1b	-2.2312	1.4e-06
per2	-0.47964	0.68889
per3	-2.3799	1.11e-07
pfas	0.56508	0.37614
pfkfb2a	1.0052	0.000106
pfkfb3	-0.03427	0.99562
pfkfb4a	0.9137	0.005102
pfkfb4b	1.2415	1.19e-05
pfkpa	0.40029	0.73812
pgam1a	1.1222	1.75e-07
pgd	1.7692	4.04e-17
pgls	1.0981	0.000466
phkg2	0.4931	0.56027
pi4k2a	-0.79336	0.034149
pi4k2b	0.81599	0.008797
pi4kaa	1.9284	1.72e-15
pik3c2a	0.24334	0.68605
pik3c3	0.08318	0.9587
pik3cb	0.73016	0.10362
pik3cd	0.45075	0.26798
pik3cg	1.0752	2.39e-05
pik3r1	-0.09477	0.9478
pik3r4	0.22252	0.7706
pikfyve	0.52281	0.21864
pip4k2aa	1.2787	1.12e-06
pip5k1ba	-0.12038	0.92681
pip5k1bb	1.3779	3.91e-05
pisd	2.1125	7.14e-07
pitrm1	1.0177	0.001936
pkma	1.4922	1.78e-10
pkmb	1.5514	7.72e-08
pla2g6	0.82216	0.012517
pld1a	1.2026	0.001593
plod2	0.54452	0.16556
plpp2a	1.0617	0.005194
pmm2	1.1672	0.000163
pmvk	1.5561	0.000167
polr2a	1.4994	5.36e-10
polr2b	1.0991	5.44e-05
postnb	1.3196	0.000161
ppan	1.0309	0.000856
ppardb	0.79389	0.028091
ppp2ca	1.1898	0.042919
ppp2r5ea	0.99653	1.95e-06
prkaa1	0.66093	0.020511
prkacaa	1.3534	2.07e-05
prkacba	1.1088	2.74e-05
prkar1aa	1.1982	4.43e-06
prkar1ab	1.0036	0.001361
prkcbb	1.6198	0.008392
prkcdb	0.61479	0.048137
prkci	0.65681	0.050795
prkcz	1.1501	0.00016
prlra	2.1579	1.21e-07
prpf8	0.52895	0.034119
prps1a	0.52444	0.27242
prss1	8.9007	2.44e-22
psen2	1.1344	0.006865
psmc2	0.61177	0.067549
psmc4	1.0221	7.97e-05
psmd1	0.67508	0.098342
psmd11b	1.022	0.000148
psmd12	1.1647	2.45e-05
psmd8	1.0944	4.86e-08
ptafr	1.3659	0.006476
ptdss1a	0.77432	0.006548
ptdss2	1.4837	2.94e-08
ptgs2b	-1.441	0.002862
ptk2bb	-0.0154	0.99991
ptpn2b	0.078097	0.95385
pwp2h	1.0924	0.002178
pygb	1.5198	3.39e-07
rab11a	1.2219	1.73e-07
rab11al	1.3758	2.15e-08
rab11fip2	1.1802	0.012205
rab5ab	0.87957	8.61e-05
rab5b	0.61756	0.00875
rack1	-0.70265	0.000696
rack1	-0.70265	0.000696
rars	1.6348	7.47e-14
rasgrp3	0.71386	0.046083
rb1	-0.35542	0.63826
rbks	-0.14507	0.91137
rbm19	1.0715	0.002556
rdh10a	1.1099	0.006438
rdh12	1.0871	0.01323
ret	1.0522	0.025177
rhocb	-0.16516	0.85242
rictorb	0.15376	0.9587
ripk2	1.2815	0.004446
rnf41	1.0918	2.51e-06
rpl18a	-0.52404	0.031979
rpl23a	0.63606	0.95755
rpl34	-1.1076	0.000289
rpl4	-0.18429	0.74579
rps27.1	-0.47537	0.06768
rps27.2	-0.56237	0.047472
rps6ka4	1.2213	0.000771
rps6ka5	1.9947	0.000686
rps6kb1a	1.8698	0.004253
rptor	1.373	7.55e-09
rras	1.1755	0.001083
rras2	1.4001	0.000904
rrs1	1.245	0.001925
rxraa	-0.84312	0.031935
rxrgb	-1.2321	0.055058
sat1a.1	-1.2914	0.000691
sc5d	1.0269	0.003304
scrib	1.8069	1.42e-09
sdha	0.32364	0.36799
sec22ba	1.0976	8.25e-06
sec61b	-0.07161	0.9587
serp1	1.1861	0.002085
setd1ba	0.79656	0.17705
sf1	0.021174	0.98266
sf3b3	0.90028	4.05e-06
sgpp1	1.2244	0.000698
sh3gl1b	0.55467	0.10104
sigmar1	1.3247	1.48e-06
sirt1	1.0231	0.024096
skp2	-1.1755	0.00034
slc35b4	1.0607	0.013589
smc1b	2.5999	0.013935
smc3	0.056349	0.9587
smpd1	0.64732	0.040144
smpd2a	1.3972	0.000567
smpd5	1.0395	4.52e-05
smurf2	1.0496	0.020059
snrnp200	1.6737	5.29e-15
soat1	0.33882	0.80803
sqlea	1.7158	2.04e-06
sqstm1	0.82519	0.001292
srebf1	0.78945	0.068857
srm	1.2216	0.000764
srp54	1.3038	8.82e-09
srp68	1.2283	6.62e-08
sst1.1	5.8468	1.35e-22
st3gal5	0.059453	0.97071
stag1a	-0.62404	0.37425
stag2b	0.74502	0.000892
stat1a	0.95994	0.003882
stat5a	0.47707	0.40791
stx5a	1.3523	4.73e-10
sucla2	1.2146	2.06e-10
tars	1.2531	1.12e-05
tbcb	1.3395	1.13e-10
tefa	0.54607	0.2422
thbs1b	2.0181	4.21e-07
tktb	1.1802	3.4e-06
tln2b	1.9403	1.16e-09
tlr3	1.6664	3.33e-07
tm7sf2	1.6142	3.56e-07
tnnt2a	-1.5557	0.000902
tp53	0.22079	0.82388
tpi1b	0.82576	0.005671
tpma	0.49953	0.60562
tram1	1.2545	1.28e-07
trdmt1	-1.5531	0.017833
tuba8l4	0.83736	0.003031
tubb4b	0.6918	0.015866
tubb5	0.33675	0.59476
uba52	-0.65648	0.013746
uck2a	1.8698	6e-08
ugcg	1.738	8.16e-09
ugp2b	0.37234	0.31321
ugt1a1	0.58865	0.056221
ugt8	1.3753	0.000484
ulk1b	1.3323	0.001181
uqcrc2b	0.94451	2.93e-05
uso1	0.56844	0.059942
usp14	1.0153	5.29e-06
vars2	0.58698	0.17158
vav3b	-0.05501	0.97664
vcla	0.61995	0.24184
vegfab	0.74787	0.029212
vps28	1.0971	2.32e-05
vps37a	0.55729	0.10232
vps4b	1.5163	3.15e-08
waslb	1.4262	4.87e-07
wdr43	1.4071	9.04e-09
wdr44	0.28767	0.58386
yars	1.0581	0.015891
yrk	0.28443	0.6049
ywhaqa	1.2259	8.29e-10
ywhaz	1.1321	4.09e-08
zak	-0.26506	0.86989

## Sheet: PPI-genes-KEGG
Category	Term	Count	%	PValue	Genes	List Total	Pop Hits	Pop Total	Fold Enrichment	Bonferroni	Benjamini	FDR
KEGG_PATHWAY	dre01100:Metabolic pathways	170	0.272913	1.09006e-11	GPAT4, LDHA, GDA, SC5D, PGD, ITPKB, PI4K2B, ACSS2, GOT2A, FDFT1, ACSL3B, ST3GAL5, CYP7A1, PIK3C3, GGT1B, HADH, C1GALT1C1, GALCB, UGCG, PISD, MDH1AA, NME7, MGAT2, PGLS, CYP1A, PTDSS1A, PI4K2A, MVK, MINPP1B, MGAT5, BCO1L, HADHAA, ME1, COASY, PIP5K1BA, CHKA, HADHAB, SRM, PIP5K1BB, CHKB, HMGCRA, ACAT2, PLD1A, HADHB, CMPK2, GMPPB, ACLYA, PFKPA, UQCRC2B, PDHA1A, FUT8A, SMPD2A, GALE, B4GALT6, ATP6V1BA, …	464	1256	5405	1.57666	1.51519e-09	1.51519e-09	1.28455e-08
KEGG_PATHWAY	dre01130:Biosynthesis of antibiotics	49	0.078663	4.15956e-09	TM7SF2, SC5D, LDHA, CBSB, PGD, LSS, ACSS2, GOT2A, FDFT1, PRPS1A, HADH, SUCLA2, SQLEA, ACADM, ACO2, PKMB, MVDA, MDH1AA, NME7, PGLS, G6PD, PKMA, MVK, BCAT1, CYP51, HADHAA, BCAT2, HADHAB, UGP2B, ADPGK, HMGCRA, HK2, ACAT2, PFAS, HADHB, PFKPA, ACLYA, ATIC, PDHA1A, ENO3, NSDHL, TPI1B, MSMO1, TKTB, FDPS, DLAT, SDHA, IDI1, PGAM1A	464	233	5405	2.44973	5.78179e-07	2.89089e-07	4.9017e-06
KEGG_PATHWAY	dre00100:Steroid biosynthesis	12	0.0192644	2.59474e-07	SOAT1, CYP51, TM7SF2, EBP, SC5D, MSMO1, CEL.2, LSS, SQLEA, DHCR24, NSDHL, FDFT1	464	21	5405	6.6564	3.60663e-05	1.20222e-05	0.000305768
KEGG_PATHWAY	dre04510:Focal adhesion	46	0.0738469	6.71182e-07	ERBB2, ACTB2, BCAR1, VAV3B, ITGA2.2, MAPK8B, COL5A2A, ARHGAP5, KDRL, COL6A4A, ITGAV, ITGB6, COL6A2, COL6A1, IGF1RA, RHOCB, IGF1RB, PIK3R1, PRKCBB, FLNCA, FLNCB, PIK3CG, ITGB1A, BRAF, ACTN4, PIK3CB, PIK3CD, GRB2A, FN1A, ITGA1, ACTN1, EGFRA, KDR, LAMA4, LAMA5, ITGA5, JUN, THBS1B, COL1A1A, COL1A2, COL1A1B, CDC42L, VCLA, LAMC1, VEGFAB, CRK	464	248	5405	2.16065	9.329e-05	2.33233e-05	0.00079093
KEGG_PATHWAY	dre01200:Carbon metabolism	28	0.0449503	4.6651e-06	HADHAA, ME1, HADHAB, ADPGK, PGD, HK2, ACAT2, ACSS2, GOT2A, PFKPA, PRPS1A, PDHA1A, ENO3, SUCLA2, PCXB, TPI1B, ACADM, ACO2, TKTB, PKMB, DLAT, MDH1AA, SDHA, PGLS, G6PD, H6PD, PKMA, PGAM1A	464	125	5405	2.60931	0.00064824	0.000129682	0.00549729
KEGG_PATHWAY	dre04910:Insulin signaling pathway	34	0.0545825	6.49423e-06	PRKCZ, FOXO1A, HK2, PDE3B, MKNK1, MAPK8B, INS, PRKACAA, GYS1, EIF4E2RS1, RPS6KB1A, PRKAA1, PIK3R1, PIK3CG, SREBF1, PRKAR1AB, BRAF, PIK3CB, PHKG2, GRB2A, CBL, PIK3CD, PRKCI, ACACA, ACACB, EIF4E1C, RPTOR, INSRA, PRKACBA, ARAF, MKNK2A, MTOR, CRK, PYGB	464	172	5405	2.30265	0.000902293	0.000150439	0.00765264
KEGG_PATHWAY	dre04512:ECM-receptor interaction	19	0.030502	0.000124422	ITGB1A, FN1A, ITGA1, ITGA2.2, COL5A2A, LAMA4, CD36, COL6A4A, ITGA5, LAMA5, ITGAV, ITGB6, COL6A2, COL1A2, THBS1B, COL1A1A, COL1A1B, COL6A1, LAMC1	464	81	5405	2.73241	0.017147	0.00246777	0.146522
KEGG_PATHWAY	dre00562:Inositol phosphate metabolism	19	0.030502	0.000147049	PIK3CG, PIP5K1BA, PIP4K2AA, ITPK1A, TPI1B, PIK3CB, PIK3C2A, PIP5K1BB, PIK3CD, ITPKB, PI4K2B, PI4KAA, PI4K2A, PIKFYVE, PIK3C3, INPP5D, MINPP1B, IPPK, IPMKB	464	82	5405	2.69909	0.0202338	0.0025519	0.173147
KEGG_PATHWAY	dre04810:Regulation of actin cytoskeleton	42	0.0674255	0.000185663	WASLB, PIP5K1BA, FGD1, PIP4K2AA, DIAPH2, PIP5K1BB, BCAR1, ACTB2, VAV3B, IQGAP2, ITGB2, ITGA2.2, INS, ITGAV, PIKFYVE, ITGB6, RRAS, CHRM2A, RHOCB, PIK3R1, PIK3CG, ARHGEF4, ITGB1A, BRAF, ACTN4, PIK3CB, ARHGEF6, PIK3CD, FN1A, ITGA1, ACTN1, GNG12A, NCKAP1, EGFRA, ITGA5, RRAS2, ARAF, CYFIP2, CYFIP1, CDC42L, VCLA, CRK	464	271	5405	1.80533	0.0254793	0.00286362	0.218569
KEGG_PATHWAY	dre04012:ErbB signaling pathway	22	0.0353181	0.000341171	PIK3CG, BRAF, PIK3CB, ERBB2, STAT5A, CBL, GRB2A, PIK3CD, MAPK8B, EGFRA, ERBB3B, JUN, ERBB3A, ARAF, RPS6KB1A, MTOR, NRG1, ABL1, MAP2K7, CRK, PIK3R1, PRKCBB	464	110	5405	2.32974	0.0463236	0.00473186	0.401303
KEGG_PATHWAY	dre00620:Pyruvate metabolism	12	0.0192644	0.000742806	ME1, PCXB, LDHA, PDHA1A, PKMB, ACACA, PKMA, ACACB, DLAT, ACAT2, ACSS2, MDH1AA	464	43	5405	3.2508	0.0981332	0.00934591	0.871838
KEGG_PATHWAY	dre04070:Phosphatidylinositol signaling system	21	0.0337127	0.000799483	PIK3CG, PIP5K1BA, PIP4K2AA, ITPK1A, PIK3CB, ITPR1B, PIK3C2A, PIP5K1BB, PIK3CD, ITPKB, PI4K2B, CDS1, PI4KAA, PIK3C3, PI4K2A, PIKFYVE, INPP5D, IPPK, IPMKB, PIK3R1, PRKCBB	464	109	5405	2.24425	0.105216	0.0092216	0.938074
KEGG_PATHWAY	dre01212:Fatty acid metabolism	14	0.0224752	0.0009848	HADHAA, ACADVL, ACSL3B, ACADM, HADHAB, CPT2, ACSL4A, ACACA, FADS2, HADH, ACAT2, CPT1AA, HSD17B12B, HADHB	464	58	5405	2.81176	0.12799	0.0104797	1.15436
KEGG_PATHWAY	dre00900:Terpenoid backbone biosynthesis	8	0.0128429	0.00176726	DHDDS, HMGCRA, FDPS, MVDA, MVK, PMVK, IDI1, ACAT2	464	22	5405	4.23589	0.217974	0.0174086	2.06284
KEGG_PATHWAY	dre00640:Propanoate metabolism	9	0.0144483	0.00182089	HADHAA, LDHA, ACADM, HADHAB, ACACA, ACACB, SUCLA2, ACAT2, ACSS2	464	28	5405	3.74423	0.223791	0.0167471	2.12482
KEGG_PATHWAY	dre04914:Progesterone-mediated oocyte maturation	20	0.0321074	0.00250124	PIK3CG, ADCY6A, ADCY7, BRAF, GNAI1, PIK3CB, PIK3CD, MAPK12A, PDE3B, MAPK8B, CDC25B, PRKACBA, GNAIA, INS, MAPK13, ARAF, PRKACAA, IGF1RA, IGF1RB, PIK3R1	464	111	5405	2.09887	0.293977	0.0215217	2.90807
KEGG_PATHWAY	dre04150:mTOR signaling pathway	15	0.0240805	0.00272009	PIK3CG, BRAF, PIK3CB, PIK3CD, RPTOR, EIF4E1C, INS, EIF4E2RS1, RPS6KB1A, PRKAA1, MTOR, RICTORB, PIK3R1, PRKCBB, ULK1B	464	72	5405	2.42681	0.315186	0.0220249	3.15881
KEGG_PATHWAY	dre00071:Fatty acid degradation	11	0.0176591	0.00278844	HADHAA, ACADVL, ACSL3B, ACADM, HADHAB, CPT2, ACSL4A, HADH, ACAT2, CPT1AA, HADHB	464	43	5405	2.9799	0.321679	0.0213322	3.23698
KEGG_PATHWAY	dre01230:Biosynthesis of amino acids	16	0.0256859	0.00407773	BCAT1, PCXB, GLULA, TPI1B, BCAT2, ACO2, TKTB, CBSB, PKMB, GOT2A, PFKPA, PRPS1A, ENO3, PKMA, PGAM1A, MAT2AB	464	83	5405	2.24553	0.433321	0.0294504	4.701
KEGG_PATHWAY	dre00051:Fructose and mannose metabolism	10	0.0160537	0.00672816	PFKPA, GMPPB, TPI1B, PFKFB2A, MPI, PFKFB3, HK2, PFKFB4B, PFKFB4A, PMM2	464	41	5405	2.84115	0.608737	0.0458351	7.64716
KEGG_PATHWAY	dre00010:Glycolysis / Gluconeogenesis	14	0.0224752	0.00824483	TPI1B, LDHA, ADPGK, PKMB, HK2, DLAT, ACSS2, GAPDHS, PFKPA, PDHA1A, ENO3, PKMA, MINPP1B, PGAM1A	464	73	5405	2.234	0.683611	0.0533248	9.29532
KEGG_PATHWAY	dre04931:Insulin resistance	21	0.0337127	0.00882607	SREBF1, PIK3CG, PRKCZ, CREB3L3L, PIK3CB, FOXO1A, PIK3CD, ACACB, CPT1AA, MAPK8B, INSRA, CD36, INS, PRKCDB, GYS1, RPS6KB1A, PRKAA1, MTOR, NFKBIAB, PIK3R1, PYGB	464	133	5405	1.83927	0.70837	0.0544725	9.91978
KEGG_PATHWAY	dre04145:Phagosome	23	0.0369235	0.0112231	RAB5AB, ITGB1A, DYNC1LI2, SEC22BA, RAB5B, ACTB2, ITGB2, ITGA2.2, M6PR, TUBA8L4, CD36, SEC61B, ITGA5, ITGAV, PIK3C3, PIKFYVE, TUBB5, THBS1B, ATP6V1AA, DYNC1I2B, DYNC1H1, ATP6V1BA, TUBB4B	464	154	5405	1.73974	0.791712	0.0659358	12.4537
KEGG_PATHWAY	dre00600:Sphingolipid metabolism	12	0.0192644	0.0117479	SGPP1, GALCB, PLPP2A, UGCG, NEU3.3, SMPD1, SMPD2A, UGT8, SMPD5, B4GALT6, DEGS2, ASAH2	464	60	5405	2.32974	0.806529	0.0661531	12.9997
KEGG_PATHWAY	dre04110:Cell cycle	21	0.0337127	0.0130992	CUL1A, CDC6, YWHAQA, YWHAZ, STAG1A, STAG2B, TP53, SKP2, CDC20, MCM2, RB1, MCM3, MCM4, MCM5, CREBBPA, SMC3, CDC25B, CDKN1BB, ABL1, ORC1, SMC1B	464	138	5405	1.77263	0.840039	0.0706901	14.3913
KEGG_PATHWAY	dre00030:Pentose phosphate pathway	8	0.0128429	0.0138937	PFKPA, PRPS1A, PGLS, G6PD, TKTB, H6PD, PGD, RBKS	464	31	5405	3.00612	0.856979	0.0720697	15.1999
KEGG_PATHWAY	dre00830:Retinol metabolism	9	0.0144483	0.0156576	RDH12, ALDH1A2, CYP1A, CYP3A65, RDH10A, BCO1, AOX6, UGT1A1, BCO1L	464	39	5405	2.68816	0.888487	0.0780323	16.9702
KEGG_PATHWAY	dre00020:Citrate cycle (TCA cycle)	8	0.0128429	0.0194601	ACLYA, SDHA, PCXB, ACO2, PDHA1A, DLAT, SUCLA2, MDH1AA	464	33	5405	2.82393	0.934887	0.0929503	20.6723
KEGG_PATHWAY	dre04620:Toll-like receptor signaling pathway	16	0.0256859	0.0203676	PIK3CG, STAT1A, PIK3CB, FOSAB, PIK3CD, MAPK12A, TLR3, MAPK8B, MYD88, MAPK13, JUN, MAP3K8, IKBKG, NFKBIAB, MAP2K7, PIK3R1	464	99	5405	1.88262	0.94275	0.093924	21.5331
KEGG_PATHWAY	dre04912:GnRH signaling pathway	18	0.0288966	0.0240946	ADCY6A, ADCY7, ITPR1B, GRB2A, MAPK12A, MAPK8B, PLD1A, MMP2, EGFRA, PTK2BB, PRKACBA, MAPK13, JUN, PRKACAA, MMP14A, CDC42L, GNAS, MAP2K7	464	119	5405	1.76199	0.966296	0.106854	24.9797
KEGG_PATHWAY	dre03320:PPAR signaling pathway	12	0.0192644	0.0283486	ACSL3B, CD36, ACADM, CPT2, PPARDB, ACSL4A, CYP7A1, FADS2, CYP8B1, CPT1AA, RXRAA, RXRGB	464	68	5405	2.05565	0.981636	0.12098	28.744
KEGG_PATHWAY	dre00280:Valine, leucine and isoleucine degradation	10	0.0160537	0.0306092	HADHAA, BCAT1, ACADM, HADHAB, BCAT2, AOX6, HADH, AACS, ACAT2, HADHB	464	52	5405	2.24014	0.986715	0.126315	30.6732
KEGG_PATHWAY	dre00564:Glycerophospholipid metabolism	15	0.0240805	0.0414212	GPD2, CHKA, GPAT4, CHKB, PLPP2A, PISD, CDS1, PLD1A, AGPAT9L, PTDSS1A, PLA2G6, ETNK2, GPAM, AGPAT2, PTDSS2	464	99	5405	1.76496	0.997206	0.163215	39.2566
KEGG_PATHWAY	dre00310:Lysine degradation	11	0.0176591	0.0439383	HADHAA, DOT1L, HADHAB, KMT2A, PLOD2, EHMT1A, ASH1L, SETD1BA, EHMT2, HADH, ACAT2	464	64	5405	2.00212	0.998061	0.167811	41.1098
KEGG_PATHWAY	dre00380:Tryptophan metabolism	9	0.0144483	0.0440011	HADHAA, CYP1A, CYP1B1, HADHAB, IDO1, AOX6, HADH, ACAT2, AOC1	464	47	5405	2.2306	0.998079	0.16365	41.1554
KEGG_PATHWAY	dre04520:Adherens junction	15	0.0240805	0.0445585	WASLB, LMO7A, ACTN4, ACTB2, ERBB2, ACTN1, CTNNA1, CREBBPA, EGFRA, INSRA, CDC42L, IGF1RA, RHOCB, IGF1RB, VCLA	464	100	5405	1.74731	0.998228	0.161379	41.5585
KEGG_PATHWAY	dre04370:VEGF signaling pathway	13	0.0208698	0.0488918	PIK3CG, NFATC2A, PIK3CB, MAPK13, PTGS2B, PIK3CD, MAPKAPK2A, CDC42L, MAPK12A, VEGFAB, PIK3R1, PRKCBB, KDR	464	83	5405	1.8245	0.999058	0.171648	44.6066
KEGG_PATHWAY	dre05132:Salmonella infection	14	0.0224752	0.0644387	WASLB, DYNC1LI2, MYD88, MAPK13, FOSAB, JUN, ACTB2, MAPK12A, CDC42L, DYNC1I2B, DYNC1H1, MAPK8B, FLNCA, FLNCB	464	96	5405	1.69877	0.999905	0.216236	54.3847
KEGG_PATHWAY	dre00510:N-Glycan biosynthesis	9	0.0144483	0.06626	MGAT4B, MGAT2, MGAT4A, GANAB, MGAT3B, FUT8A, DPM3, MAN1A1, MGAT5	464	51	5405	2.05565	0.999927	0.216783	55.4202
KEGG_PATHWAY	dre00270:Cysteine and methionine metabolism	8	0.0128429	0.0779594	LDHA, SRM, CBSB, DNMT3AA, AHCYL1, GOT2A, MDH1AA, MAT2AB	464	44	5405	2.11795	0.999987	0.245765	61.5755
KEGG_PATHWAY	dre04540:Gap junction	17	0.0272913	0.0787709	ADCY6A, ADCY7, ITPR1B, GNAI1, GRB2A, LPAR1, CSNK1DB, ADRB3B, EGFRA, TUBA8L4, PRKACBA, GNAIA, PRKACAA, TUBB5, GNAS, PRKCBB, TUBB4B	464	128	5405	1.54709	0.999989	0.242823	61.9721
KEGG_PATHWAY	dre00230:Purine metabolism	23	0.0369235	0.0878778	GDA, ADCY6A, PDE5AB, ADCY7, PKMB, PDE3B, PDE3A, PDE10A, HPRT1, POLR2B, PFAS, NME7, POLR2A, PRPS1A, IMPDH1B, PDE4BA, ATIC, PDE7A, PKMA, ENTPD6, ENTPD4, ENTPD1, IMPDH2	464	190	5405	1.41011	0.999997	0.262445	66.1734
KEGG_PATHWAY	dre04068:FoxO signaling pathway	21	0.0337127	0.0886363	PIK3CG, BRAF, PIK3CB, FOXO1A, GRB2A, PIK3CD, SKP2, MAPK12A, MAPK8B, SIRT1, CREBBPA, EGFRA, INSRA, CDKN1BB, INS, MAPK13, ARAF, IGF1RA, PRKAA1, IGF1RB, PIK3R1	464	170	5405	1.43896	0.999998	0.2592	66.5034
KEGG_PATHWAY	dre04144:Endocytosis	34	0.0545825	0.0922806	WASLB, PRKCZ, ARFGAP2, RAB5AB, PIP5K1BA, RAB5B, ARRB2B, PIP5K1BB, CLTCA, VPS37A, EHD1B, EHD1A, PLD1A, GBF1, VPS4B, RAB11A, IGF1RA, RHOCB, IGF1RB, RAB11AL, CBL, PRKCI, EGFRA, RAB11FIP2, AP2A1, IGF2R, CDC42L, GRK4, SMURF2, PDCD6IP, VPS28, SH3GL1B, RNF41, EPN2	464	305	5405	1.29854	0.999999	0.263513	68.0482
KEGG_PATHWAY	dre00770:Pantothenate and CoA biosynthesis	4	0.00642147	0.0936784	BCAT1, COASY, BCAT2, PANK1B	464	13	5405	3.58422	0.999999	0.262011	68.6233
