# Supplementary material for: Effect of Dietary Tryptophan on Growth, Intestinal Microbiota, and Intestinal Gene Expression in an Improved Triploid Crucian Carp
Source: Front Nutr. 2021 Jun 17;8:676035. doi: 10.3389/fnut.2021.676035 (PMC8247481; doi:10.3389/fnut.2021.676035)
Supplement: Supplementary file 8 [file Table_8.XLSX]

## Sheet: ConVS Decent.DEG
gene_id	DECENT_readcount	CON_readcount	log2FoldChange	pval	padj
Cluster-34894.14780	9.00809	0	2.4061	0.00051141	0.0097825
Cluster-1082.0	9.20415	0	2.5118	0.00027943	0.0060467
Cluster-1427.0	9.80022	0	2.6133	0.00015127	0.003691
Cluster-1826.1	10.8504	0	2.4917	0.00031861	0.0067039
Cluster-9183.0	12.0347	0	2.8983	2.2381e-05	0.00077408
Cluster-34894.96309	12.4728	0	2.6895	9.6879e-05	0.0025716
Cluster-34894.98462	14.4108	0	3.1382	3.5474e-06	0.00016348
Cluster-34894.6209	14.824	0	3.0797	5.9241e-06	0.00025311
Cluster-34894.76020	16.0671	0	3.2032	2.1663e-06	0.00010871
Cluster-34894.96325	17.6076	0	3.0304	9.5286e-06	0.00037648
Cluster-32884.1	17.8462	0	3.0379	9.0446e-06	0.00036067
Cluster-34894.8569	19.686	0	3.5698	6.9589e-08	5.6319e-06
Cluster-1864.0	23.1898	0	3.6996	2.0089e-08	1.9443e-06
Cluster-34894.7396	87.4259	0	5.3863	2.3768e-19	3.4112e-16
Cluster-34894.17915	110.415	0	5.895	5.5092e-25	1.6132e-21
Cluster-34894.16312	201.685	0	6.4152	1.2483e-29	6.3157e-26
Cluster-34894.105264	23.4186	0.301991	3.2339	1.0755e-06	5.9653e-05
Cluster-34894.14957	11.1472	0.338486	2.4702	0.00028682	0.0061675
Cluster-34894.14462	11.5151	0.338486	2.4264	0.00038953	0.0078728
Cluster-29592.0	11.7433	0.338486	2.5794	0.0001379	0.0034274
Cluster-34894.104516	17.8676	0.338486	3.192	9.5699e-07	5.3952e-05
Cluster-34894.94634	21.6067	0.338486	3.442	7.8749e-08	6.2821e-06
Cluster-34894.16163	12.7135	0.344767	2.5659	0.00016116	0.0038776
Cluster-34894.97108	12.9773	0.344767	2.6217	0.00010872	0.0028232
Cluster-34894.6182	16.983	0.344767	3.1027	2.23e-06	0.0001115
Cluster-34894.13435	60.1218	0.344767	4.8415	7.6538e-17	6.135e-14
Cluster-34894.98572	123.129	0.344767	5.5537	2.3894e-22	4.9325e-19
Cluster-34894.96460	832.728	0.344767	8.0331	4.6288e-57	8.7192e-53
Cluster-34894.16829	1725.57	0.344767	4.9945	5.6095e-14	2.3547e-11
Cluster-35406.1	12.6619	0.603983	2.4736	0.00020093	0.0046297
Cluster-25214.0	11.7452	0.640477	2.411	0.00028555	0.006149
Cluster-7665.0	13.275	0.640477	2.532	0.00013014	0.0032647
Cluster-5103.0	75.136	0.640477	4.8692	3.6802e-18	3.8782e-15
Cluster-17716.0	22.2651	0.646758	3.2682	1.7102e-07	1.2349e-05
Cluster-8208.0	13.6278	0.676972	2.5004	0.00017019	0.0040575
Cluster-34894.23832	14.4662	0.676972	2.5599	0.00011495	0.0029491
Cluster-34894.106723	17.1557	0.683253	2.8636	9.2591e-06	0.00036825
Cluster-14874.0	15.7738	0.948749	2.5812	5.6842e-05	0.0016591
Cluster-34894.21929	13.274	0.978964	2.3455	0.00032261	0.0067721
Cluster-34894.11517	148.732	0.978964	3.129	5.444e-06	0.00023547
Cluster-34894.109486	18.5197	0.985244	2.5354	0.00012468	0.0031498
Cluster-34894.102395	40.8629	0.985244	3.7449	3.3377e-10	5.2557e-08
Cluster-34894.91124	856.727	0.991525	7.6343	6.5488e-54	1.0965e-49
Cluster-34894.104799	14.4026	1.02802	2.3354	0.00039158	0.0079057
Cluster-34894.14716	2099.31	1.02802	8.7566	2.2798e-75	8.5887e-71
Cluster-34894.15114	18.8785	1.0343	2.5119	0.00014824	0.0036323
Cluster-34894.13522	53.6545	1.0343	3.9292	7.1558e-11	1.3702e-08
Cluster-34894.98053	1348.69	1.0343	6.5369	4.1946e-27	1.5802e-23
Cluster-28175.0	15.8453	1.36023	2.3691	0.00019787	0.0045755
Cluster-34894.6236	15.9085	1.36023	2.3743	0.00019013	0.0044318
Cluster-34894.5263	22.6349	1.36651	2.8875	1.8025e-06	9.2926e-05
Cluster-18383.0	19.5762	1.37907	2.4833	0.00011928	0.0030374
Cluster-15371.0	33.0847	1.58295	3.2972	5.599e-09	6.2545e-07
Cluster-34894.99140	20.9505	1.59551	2.4142	0.00017794	0.0042094
Cluster-34894.101474	16.6273	1.61944	2.2989	0.00024462	0.0054161
Cluster-34894.101998	18.7781	1.632	2.5133	3.4245e-05	0.0010924
Cluster-34894.96294	18.4948	1.65594	2.4193	9.901e-05	0.002616
Cluster-34894.7444	17.4516	1.69871	2.3172	0.00022492	0.0050724
Cluster-34894.11427	54.9936	1.71755	3.6961	2.1085e-10	3.5148e-08
Cluster-34894.16038	71.2061	1.71755	4.18	1.8291e-14	8.5869e-12
Cluster-28743.0	45.3208	1.72383	3.2733	1.0754e-07	8.2726e-06
Cluster-6028.0	20.8593	1.81195	2.2868	0.00038377	0.0077942
Cluster-34894.104654	49.9764	1.92771	3.5703	2.1431e-10	3.5528e-08
Cluster-34894.12200	17.3669	1.93399	2.2831	0.00015649	0.0037901
Cluster-5991.0	18.6909	1.96421	2.3691	7.9201e-05	0.0021787
Cluster-18299.0	20.3195	2.0372	2.2448	0.00042882	0.0085162
Cluster-34894.110712	23.7717	2.0372	2.5443	2.983e-05	0.00097574
Cluster-34894.99317	25.0557	2.04976	2.6868	5.5432e-06	0.00023955
Cluster-34894.66552	18.4797	2.06232	2.2144	0.00039995	0.0080349
Cluster-34894.7571	20.0067	2.18693	2.2854	0.00016429	0.0039391
Cluster-34894.26734	28.8055	2.19949	2.7983	1.0112e-06	5.6647e-05
Cluster-34894.33968	22.2286	2.23598	2.43	4.2673e-05	0.0013113
Cluster-34894.1342	28.2327	2.23598	2.8252	4.1726e-07	2.6431e-05
Cluster-34894.96734	17.8525	2.25992	2.1422	0.00043685	0.008643
Cluster-34894.96991	17.2102	2.2662	2.1439	0.00034287	0.007111
Cluster-34894.83424	30.0502	2.2662	2.9086	1.4294e-07	1.0611e-05
Cluster-34894.36913	20.1546	2.30269	2.2972	0.00012754	0.0032114
Cluster-34894.101313	218.988	2.33919	5.4322	6.9571e-29	3.1769e-25
Cluster-34894.18044	26.2406	2.35803	2.6939	1.9384e-06	9.8917e-05
Cluster-34894.13548	20.8549	2.36431	2.3371	8.4395e-05	0.0022936
Cluster-26287.0	32.5506	2.36431	2.8478	1.0055e-06	5.6372e-05
Cluster-34894.109736	30.1453	2.39453	2.7731	1.722e-06	8.9418e-05
Cluster-34894.12666	603.919	2.53798	5.3517	1.5195e-18	1.7889e-15
Cluster-34894.7859	20.5144	2.58075	2.202	0.00022319	0.0050403
Cluster-34894.86393	22.1619	2.58075	2.3458	5.2506e-05	0.0015542
Cluster-16827.0	19.2379	2.60469	2.1463	0.00029484	0.0063013
Cluster-34894.18810	19.9913	2.61097	2.1611	0.00029903	0.0063675
Cluster-34894.105756	20.0067	2.61097	2.2435	9.8325e-05	0.0026022
Cluster-34894.71656	21.4982	2.61097	2.3506	3.3291e-05	0.0010676
Cluster-34233.0	27.3663	2.61725	2.5638	9.3862e-06	0.00037212
Cluster-34894.78746	40.359	2.62981	3.1457	4.7451e-09	5.3844e-07
Cluster-14781.0	22.2258	2.64746	2.3083	8.1803e-05	0.0022368
Cluster-34894.22373	19.4267	2.65374	2.1989	0.00013964	0.0034632
Cluster-34894.9676	21.5133	2.65374	2.3429	3.5517e-05	0.0011268
Cluster-34894.54002	25.0503	2.66002	2.534	5.8049e-06	0.00024873
Cluster-34894.85504	20.2579	2.69652	2.2147	0.00014471	0.0035644
Cluster-32127.1	20.1965	2.72673	2.143	0.00035382	0.0072979
Cluster-34894.7359	148.475	2.75185	2.8765	2.7019e-05	0.00090501
Cluster-34894.73176	30.1216	2.91296	2.6555	1.4194e-06	7.5794e-05
Cluster-34894.12702	18.6579	2.91924	2.0359	0.0004496	0.00883
Cluster-34894.17432	27.2206	2.91924	2.566	2.2097e-06	0.00011059
Cluster-34894.104525	20.7765	2.99223	2.1822	0.00011387	0.0029292
Cluster-34894.10664	54.114	2.99851	3.0377	4.188e-07	2.6484e-05
Cluster-34894.15713	37.1231	3.00479	2.948	2.3085e-08	2.1879e-06
Cluster-34894.100347	110.837	3.035	2.5028	0.00028466	0.0061343
Cluster-34894.110458	197.936	3.07778	5.1223	1.1226e-27	4.572e-24
Cluster-34894.6970	253.742	3.08406	5.408	1.9851e-30	1.0683e-26
Cluster-34894.96653	25.6568	3.09918	2.233	0.00018405	0.0043261
Cluster-34894.11910	24.4524	3.13568	2.2699	6.5227e-05	0.0018546
Cluster-34894.14791	31.6593	3.17845	2.6453	8.7358e-07	4.977e-05
Cluster-34894.56798	24.7338	3.23888	2.1821	0.00023119	0.0051843
Cluster-34894.7569	18.9572	3.264	1.97	0.00051873	0.0099023
Cluster-34894.16182	35.3336	3.27657	2.6136	6.1062e-06	0.00025964
Cluster-25114.0	27.5441	3.29422	2.464	4.9102e-06	0.00021579
Cluster-34894.15804	110.266	3.3005	4.2728	7.1567e-19	8.9873e-16
Cluster-34894.83302	22.6431	3.36721	2.1324	0.0001991	0.0045994
Cluster-7344.0	41.3529	3.51066	2.8177	2.26e-07	1.5694e-05
Cluster-34894.10374	23.8082	3.55972	2.1721	7.8222e-05	0.0021577
Cluster-34894.98790	21.2149	3.566	2.0133	0.00034066	0.007073
Cluster-34894.83327	33.8454	3.58993	2.6482	3.6633e-07	2.3591e-05
Cluster-34894.84846	23.5136	3.60249	2.1509	9.526e-05	0.0025336
Cluster-34671.3	24.3385	3.60249	2.187	7.1154e-05	0.0019915
Cluster-34894.12066	30.3923	3.60877	2.4566	6.652e-06	0.00027969
Cluster-34894.13731	23.2008	3.63899	2.1387	9.156e-05	0.0024576
Cluster-20776.0	171.916	3.70688	3.1586	2.5116e-06	0.00012253
Cluster-19351.0	24.9934	3.71198	2.1487	0.00016145	0.0038825
Cluster-34894.95554	44.0053	3.77616	2.7627	6.948e-07	4.1011e-05
Cluster-34894.29041	26.538	3.88564	2.2054	5.5094e-05	0.0016181
Cluster-34894.12685	23.1438	3.89192	2.0399	0.00022016	0.0049837
Cluster-34894.78749	34.5261	3.91076	2.5999	3.6654e-07	2.3595e-05
Cluster-34894.16508	21.2379	3.94726	1.9406	0.00039866	0.0080145
Cluster-34894.98356	32.4288	3.95354	2.4292	8.5101e-06	0.00034483
Cluster-16269.0	23.1375	4.02653	2.0225	0.00023432	0.0052377
Cluster-34894.33325	33.6754	4.04418	2.4659	5.3694e-06	0.00023305
Cluster-34894.12552	228.572	4.07558	5.093	7.477e-31	4.3336e-27
Cluster-34894.89673	24.3608	4.25553	2.0278	0.00017797	0.0042095
Cluster-34894.103267	25.0352	4.27318	2.0739	0.00010113	0.002661
Cluster-34894.17314	22.2723	4.27946	1.9273	0.00034921	0.0072166
Cluster-34894.99084	24.7964	4.27946	2.0647	0.0001078	0.0028042
Cluster-34894.22349	31.4302	4.29712	2.2982	2.6093e-05	0.00087964
Cluster-34894.99799	26.6941	4.31596	2.1453	5.7115e-05	0.0016651
Cluster-34894.83985	27.7534	4.31596	2.2086	2.6075e-05	0.00087926
Cluster-15391.2	29.9344	4.32852	2.3182	6.7372e-06	0.00028272
Cluster-34894.98322	27.6587	4.35245	2.1489	7.8049e-05	0.0021533
Cluster-34894.77898	41.2458	4.37011	2.4724	2.1267e-05	0.00074302
Cluster-34894.63892	68.8556	4.37129	2.9086	1.361e-06	7.3301e-05
Cluster-34894.16252	3987.96	4.39014	6.8457	4.7253e-31	2.8483e-27
Cluster-34894.84690	27.0639	4.40151	2.1016	0.00013787	0.0034273
Cluster-34894.97895	41.2352	4.40779	2.6644	3.2937e-07	2.1589e-05
Cluster-34894.43857	25.5822	4.50218	2.0466	9.6725e-05	0.002568
Cluster-34894.8253	26.4552	4.51474	2.0294	0.00020942	0.0047837
Cluster-34894.20320	24.1833	4.53868	1.9384	0.00035576	0.0073298
Cluster-36695.0	33.4819	4.55124	2.3922	2.5884e-06	0.00012539
Cluster-34894.101279	81.3751	4.55124	3.5495	7.8321e-14	3.1473e-11
Cluster-34894.11833	22.6582	4.59402	1.873	0.00045883	0.0089725
Cluster-34894.14347	22.6661	4.59402	1.8661	0.00050427	0.0096656
Cluster-34894.98621	30.3967	4.59402	2.2734	7.537e-06	0.00031066
Cluster-34894.8029	25.771	4.64188	1.9833	0.00029286	0.0062723
Cluster-34894.2488	23.5998	4.66072	1.9101	0.00034505	0.0071513
Cluster-34894.17029	35.0857	4.74884	2.2957	2.4801e-05	0.0008444
Cluster-34894.96785	4747.31	4.82045	2.8793	3.2436e-05	0.0010453
Cluster-34894.14217	25.2071	4.90738	1.9141	0.00035321	0.0072884
Cluster-34894.20899	25.1608	4.92622	1.9448	0.00017753	0.0042018
Cluster-25930.0	29.1234	4.93878	2.103	6.0819e-05	0.0017501
Cluster-8078.4	39.1754	4.95644	2.4833	1.1463e-06	6.302e-05
Cluster-13705.0	24.7599	4.97528	1.9131	0.00025064	0.0055195
Cluster-33830.1	70.7152	4.98156	3.283	4.6498e-12	1.2102e-09
Cluster-34894.102713	29.5193	4.99293	2.1264	4.142e-05	0.0012798
Cluster-34894.101777	38.714	4.99293	2.4001	7.0301e-06	0.00029305
Cluster-34894.5349	24.8143	4.99921	1.8922	0.0003888	0.0078624
Cluster-34894.15652	29.5763	5.0269	2.02	0.00023923	0.0053242
Cluster-34894.15619	36.2378	5.05711	2.3191	8.8275e-06	0.00035436
Cluster-34894.17808	2735.63	5.12244	4.3453	1.0274e-10	1.8775e-08
Cluster-34894.20216	28.8697	5.1666	1.9945	0.00022614	0.005094
Cluster-34894.13664	28.8669	5.17288	2.0397	8.5509e-05	0.0023193
Cluster-10841.0	70.7105	5.18544	3.2349	5.239e-12	1.3514e-09
Cluster-34894.100732	33.0743	5.22821	2.211	1.5931e-05	0.00058185
Cluster-34894.15708	31.0104	5.23449	2.1143	5.0542e-05	0.0015037
Cluster-34894.29906	34.7552	5.24587	2.2804	6.6662e-06	0.00028014
Cluster-34894.27520	24.2192	5.26471	1.8193	0.00049263	0.0094942
Cluster-34894.65933	29.6099	5.26471	2.0944	3.0516e-05	0.0009947
Cluster-15355.1	28.0436	5.27099	2.0016	0.00010015	0.0026402
Cluster-34894.6863	30.1528	5.27608	1.9747	0.00046767	0.00911
Cluster-34894.14400	25.4878	5.28864	1.8536	0.00051083	0.009775
Cluster-34894.16375	36.2045	5.32632	2.3052	6.6132e-06	0.00027829
Cluster-34894.15557	46.8956	5.33517	2.5875	3.7476e-07	2.4082e-05
Cluster-19321.0	31.5508	5.3377	2.1153	5.552e-05	0.0016271
Cluster-34894.14566	36.4578	5.37794	2.2815	7.6123e-06	0.00031334
Cluster-34894.5821	304.52	5.40559	5.0755	1.2573e-29	6.3157e-26
Cluster-34894.24606	27.3452	5.41444	1.9142	0.00023461	0.0052431
Cluster-34894.83726	37.7538	5.45093	2.2575	2.2624e-05	0.00078051
Cluster-34894.14416	33.2965	5.47487	2.1508	2.8451e-05	0.00094021
Cluster-34894.15189	34.477	5.48115	2.2136	1.139e-05	0.00043792
Cluster-34894.20557	36.8471	5.48115	2.3309	1.6621e-06	8.6876e-05
Cluster-34894.27724	24.8445	5.48743	1.8006	0.00049225	0.0094894
Cluster-34894.44470	77.8551	5.50627	3.3584	1.8667e-14	8.6822e-12
Cluster-34894.35116	33.0315	5.52392	2.1457	2.7215e-05	0.00090995
Cluster-34894.102217	34.6287	5.54786	2.2114	1.1767e-05	0.00044973
Cluster-34894.90950	29.8541	5.55414	2.0353	5.2415e-05	0.0015524
Cluster-24797.8	37.1543	5.56042	2.3333	1.4486e-06	7.7081e-05
Cluster-34894.94217	28.2629	5.57298	1.9808	6.4485e-05	0.001838
Cluster-34894.100203	32.3926	5.57926	2.1045	4.4121e-05	0.0013459
Cluster-34894.10159	386.229	5.62203	5.4604	1.702e-40	1.9729e-36
Cluster-34894.2315	27.3515	5.63341	1.8793	0.00035278	0.0072804
Cluster-34894.33992	25.6606	5.65225	1.8309	0.00032707	0.0068417
Cluster-34894.101122	41.5341	5.65225	2.4825	1.6805e-07	1.217e-05
Cluster-34894.14994	32.4059	5.65853	2.1236	2.2881e-05	0.00078831
Cluster-34894.20371	27.7481	5.66481	1.9054	0.0002352	0.0052523
Cluster-34894.100280	35.5347	5.70759	2.171	4.0037e-05	0.001244
Cluster-34894.22644	28.7895	5.80707	1.8723	0.00045438	0.0089012
Cluster-35523.0	67.7304	5.84219	2.7269	2.1376e-06	0.00010748
Cluster-34894.96307	6267.52	5.84847	3.0922	7.933e-06	0.0003245
Cluster-4270.1	45.7938	5.85613	2.5691	2.8506e-08	2.6225e-06
Cluster-34648.0	29.9335	5.86869	2.0002	3.9576e-05	0.0012327
Cluster-34894.26193	27.4718	5.87497	1.8785	0.00015154	0.0036951
Cluster-34894.90421	28.6941	5.87497	1.9391	8.0114e-05	0.0021966
Cluster-34894.15474	29.7116	5.88634	1.9186	0.00026257	0.0057403
Cluster-34894.8991	30.657	5.91775	2.0149	4.1717e-05	0.0012874
Cluster-34894.14461	31.2732	5.91775	2.0261	4.6868e-05	0.0014114
Cluster-34894.96944	46.8921	5.92403	2.5348	2.3601e-07	1.6232e-05
Cluster-34894.83045	34.8364	5.9354	2.1644	1.168e-05	0.00044674
Cluster-34894.20154	30.2117	5.94168	1.9619	0.00011937	0.0030392
Cluster-34894.101283	25.5759	5.94796	1.7632	0.00051894	0.0099052
Cluster-34894.20988	38.9085	6.00211	2.2375	1.5458e-05	0.00056774
Cluster-34894.8401	31.3437	6.01586	1.977	0.00014156	0.0035004
Cluster-34894.14429	68.1766	6.05744	3.0664	1.2442e-11	2.916e-09
Cluster-34894.32236	36.8638	6.09141	2.1938	7.1667e-06	0.0002976
Cluster-34894.87239	27.6329	6.12791	1.7946	0.00051636	0.0098659
Cluster-34894.82824	36.5255	6.12791	2.2014	4.159e-06	0.0001872
Cluster-34894.11709	44.7389	6.12791	2.4573	2.3155e-07	1.6014e-05
Cluster-34894.102588	29.5432	6.17068	1.9088	0.00010806	0.0028105
Cluster-34894.71030	33.057	6.17696	2.0295	5.0625e-05	0.0015053
Cluster-34894.101484	1176.59	6.17696	6.739	7.6289e-60	1.6423e-55
Cluster-34894.102709	350.584	6.18324	2.5415	0.00024113	0.0053571
Cluster-34894.15888	40.2772	6.24995	2.3293	5.7578e-07	3.5001e-05
Cluster-34894.99676	28.3495	6.25623	1.8473	0.00020231	0.0046546
Cluster-34894.103692	36.7857	6.25623	2.2048	3.3224e-06	0.00015474
Cluster-34894.89540	34.3911	6.26879	2.0634	4.3281e-05	0.0013259
Cluster-34894.36277	28.3199	6.28645	1.8281	0.00027693	0.0060002
Cluster-34894.8493	28.5223	6.30529	1.8459	0.00021185	0.0048305
Cluster-34894.16456	37.6613	6.30529	2.2177	3.7294e-06	0.00017087
Cluster-34894.29510	28.115	6.31666	1.8089	0.00036748	0.0075333
Cluster-19987.1	37.1366	6.32294	2.192	5.7928e-06	0.00024835
Cluster-16584.0	61.4974	6.32294	2.9027	4.6693e-11	9.4195e-09
Cluster-34894.35049	58.1901	6.38084	2.7622	1.4029e-09	1.8529e-07
Cluster-34894.10499	32.6605	6.43243	1.8968	0.0005001	0.009604
Cluster-34894.16854	38.9919	6.44246	2.1939	8.5371e-06	0.00034574
Cluster-34894.102369	37.4482	6.50917	2.1571	7.326e-06	0.00030325
Cluster-34894.15562	40.2756	6.50917	2.2661	1.5436e-06	8.1249e-05
Cluster-34894.9961	34.8254	6.58844	2.0647	1.5166e-05	0.00055877
Cluster-26774.0	38.0962	6.59472	2.2043	1.7791e-06	9.2065e-05
Cluster-34894.36758	180.747	6.59981	2.7198	5.7182e-05	0.0016659
Cluster-34894.70713	56.4762	6.61356	2.7143	1.7024e-09	2.1983e-07
Cluster-34894.23146	42.6265	6.63749	2.3514	2.4041e-07	1.6467e-05
Cluster-12392.0	57.1	6.64006	2.567	4.9907e-07	3.0873e-05
Cluster-34894.104206	32.4273	6.6589	1.9036	0.00015533	0.0037675
Cluster-34894.26260	55.7124	6.67399	2.7016	1.289e-09	1.7173e-07
Cluster-34894.8270	166.157	6.68655	4.0421	5.8135e-19	7.4876e-16
Cluster-34894.6070	40.0654	6.72561	2.1822	7.4812e-06	0.00030878
Cluster-24562.0	28.8722	6.73817	1.7548	0.00049089	0.0094718
Cluster-34894.96472	6063.56	6.82116	6.039	6.8447e-22	1.2734e-18
Cluster-34894.103707	33.8954	6.84137	1.9584	6.351e-05	0.001815
Cluster-34894.40899	37.0822	6.86021	2.1171	4.3392e-06	0.00019363
Cluster-34894.15257	39.3809	6.86649	2.1981	1.494e-06	7.8967e-05
Cluster-34894.47996	33.8155	6.87787	1.9472	8.3201e-05	0.0022673
Cluster-34894.14945	29.7846	6.88415	1.8052	0.00019456	0.0045141
Cluster-34894.18803	36.3118	6.89043	2.0569	1.7616e-05	0.00063264
Cluster-34894.20157	44.1218	6.96717	2.2248	8.7778e-06	0.00035311
Cluster-34894.17293	109.842	6.98226	3.2888	1.7018e-10	2.9136e-08
Cluster-34894.60354	31.7528	6.99482	1.8606	0.0001621	0.0038948
Cluster-34894.46248	40.5214	6.99991	2.1721	7.1749e-06	0.00029781
Cluster-34894.11933	34.1985	7.01876	1.9594	5.8131e-05	0.0016875
Cluster-14563.0	31.4863	7.03388	1.8219	0.00021411	0.0048695
Cluster-34894.69855	50.3874	7.04016	2.4794	2.9661e-08	2.7155e-06
Cluster-34894.22778	36.9916	7.04269	2.0388	3.6957e-05	0.0011653
Cluster-34894.32780	48.9057	7.05525	2.4429	1.1692e-07	8.8765e-06
Cluster-34894.9122	33.9096	7.16849	1.921	5.8245e-05	0.0016905
Cluster-34894.96744	31.3195	7.19242	1.7976	0.00026417	0.0057685
Cluster-34894.26768	35.2987	7.19242	1.9862	2.1376e-05	0.00074584
Cluster-34894.38619	36.5138	7.19242	2.0224	1.703e-05	0.00061527
Cluster-34894.29410	38.6872	7.20498	2.0707	2.0169e-05	0.00070913
Cluster-34894.84009	33.9505	7.21007	1.8522	0.00035519	0.0073211
Cluster-34894.6752	36.6073	7.2301	1.9167	0.00030236	0.0064236
Cluster-34894.99813	41.5791	7.26916	2.0834	4.6109e-05	0.0013925
Cluster-34894.92412	37.6962	7.28425	2.0728	6.575e-06	0.00027698
Cluster-34894.105700	30.8137	7.29053	1.7782	0.00026211	0.0057343
Cluster-34894.17296	44.3763	7.29562	2.2646	1.1423e-06	6.2847e-05
Cluster-34894.14869	42.0084	7.29681	2.1913	3.057e-06	0.00014446
Cluster-34894.5333	34.6919	7.33587	1.9054	7.9065e-05	0.0021754
Cluster-34894.37487	36.7964	7.33587	1.9743	4.5855e-05	0.0013864
Cluster-34894.93796	38.8943	7.49441	2.0778	4.267e-06	0.00019098
Cluster-34894.44227	52.1942	7.50069	2.475	1.2869e-08	1.3175e-06
Cluster-34894.26969	36.4248	7.52581	1.9498	5.0133e-05	0.0014936
Cluster-34894.88007	33.8589	7.53719	1.8768	6.5375e-05	0.0018577
Cluster-34894.65578	70.2591	7.53719	2.8675	1.6633e-11	3.7747e-09
Cluster-34894.44917	31.7802	7.56112	1.7591	0.00036847	0.0075495
Cluster-34894.21646	35.4831	7.57115	1.8418	0.00033094	0.0069111
Cluster-34894.55961	35.2443	7.57368	1.9089	6.1513e-05	0.001767
Cluster-34894.16475	35.6827	7.59762	1.9143	7.1371e-05	0.0019961
Cluster-34894.7011	30.9705	7.61018	1.7282	0.00040123	0.0080596
Cluster-34894.61207	1669.13	7.62783	6.9367	3.8116e-63	1.1488e-58
Cluster-34894.16710	37.9017	7.63411	1.9477	0.00011147	0.0028818
Cluster-34894.18650	46.9255	7.64039	2.2801	9.3979e-07	5.3121e-05
Cluster-34894.97561	42.951	7.68692	2.1456	3.5212e-06	0.00016242
Cluster-34894.81368	40.1818	7.69201	1.983	9.912e-05	0.0026177
Cluster-34894.39772	40.2602	7.72594	2.0456	2.4317e-05	0.00083056
Cluster-34894.9976	47.9971	7.74107	2.2922	4.7692e-07	2.9707e-05
Cluster-34894.11288	31.2323	7.74735	1.705	0.00049972	0.0095978
Cluster-34894.6164	150.402	7.76244	3.6529	3.8027e-14	1.6514e-11
Cluster-34894.6548	33.7626	7.78384	1.777	0.00038526	0.0078141
Cluster-34894.76710	34.4147	7.78384	1.8293	0.00015773	0.0038136
Cluster-34894.32909	39.2223	7.84546	2.0401	5.3499e-06	0.00023227
Cluster-34894.17289	5478.17	7.86174	4.9003	1.2009e-13	4.6881e-11
Cluster-18508.0	32.5179	7.86939	1.7629	0.00021409	0.0048695
Cluster-34894.11469	31.4098	7.93729	1.706	0.00038917	0.0078678
Cluster-34894.8057	52.3868	7.97888	2.3866	1.3187e-07	9.862e-06
Cluster-34894.22821	47.0473	8.02912	2.2184	2.205e-06	0.00011043
Cluster-34894.102414	43.2705	8.04306	2.0679	1.7657e-05	0.00063361
Cluster-34894.67186	55.2075	8.04306	2.4029	2.387e-07	1.6373e-05
Cluster-34894.22918	36.472	8.08955	1.8629	0.00014063	0.0034826
Cluster-34368.0	51.8911	8.09211	2.3673	5.5507e-08	4.6419e-06
Cluster-34894.38023	31.1942	8.09839	1.6692	0.00048952	0.0094539
Cluster-34894.34268	128.529	8.09839	3.6604	3.2003e-23	7.4194e-20
Cluster-35240.7	38.8264	8.13489	1.8856	0.00018846	0.0044064
Cluster-34894.92222	39.2902	8.15373	1.9757	1.7372e-05	0.00062509
Cluster-34894.4857	33.4372	8.17766	1.7346	0.00033457	0.0069737
Cluster-34894.92604	47.2469	8.18904	2.1742	4.8663e-06	0.00021405
Cluster-34894.25633	57.978	8.2016	2.5071	5.9419e-09	6.5694e-07
Cluster-34894.83945	8146.94	8.24928	3.0174	1.3188e-05	0.00049484
Cluster-31356.1	32.3791	8.2695	1.718	0.00021703	0.0049273
Cluster-34894.15651	40.1151	8.28462	1.9351	6.4609e-05	0.0018401
Cluster-34894.105835	42.9072	8.30599	2.0873	3.7589e-06	0.00017202
Cluster-34894.87619	37.5357	8.34249	1.8896	5.5272e-05	0.001622
Cluster-34894.15887	38.5837	8.36642	1.8959	9.1006e-05	0.0024454
Cluster-34894.90581	45.1675	8.39782	2.1223	4.6994e-06	0.00020792
Cluster-34894.27222	42.1007	8.42176	1.9903	4.4108e-05	0.0013459
Cluster-34894.81216	32.5963	8.43688	1.6777	0.00039688	0.0079915
Cluster-34894.28869	0	8.44316	-2.4091	0.00050156	0.0096271
Cluster-34894.97620	38.6671	8.44944	1.9234	1.7622e-05	0.00063264
Cluster-34894.13550	37.981	8.45572	1.8763	5.8555e-05	0.0016975
Cluster-34894.5288	46.6892	8.462	2.1758	6.9752e-07	4.1156e-05
Cluster-34894.49529	34.4748	8.46709	1.7358	0.00031365	0.0066151
Cluster-34894.11396	36.4427	8.54755	1.8184	9.4109e-05	0.0025094
Cluster-34894.89243	46.5715	8.55265	2.1663	7.1713e-07	4.2082e-05
Cluster-34894.12704	45.408	8.56521	2.143	6.9979e-07	4.1258e-05
Cluster-34894.6068	41.7428	8.58914	2.0086	7.6623e-06	0.00031514
Cluster-34894.11548	47.6915	8.60798	2.2051	2.9291e-07	1.9557e-05
Cluster-34894.101011	35.7066	8.62054	1.7584	0.00027205	0.0059107
Cluster-22875.0	38.9267	8.66332	1.8741	8.7604e-05	0.0023688
Cluster-34894.14774	75.3701	8.66332	2.8155	9.0754e-12	2.1943e-09
Cluster-34894.13647	41.0665	8.69234	1.9169	8.75e-05	0.0023664
Cluster-34894.102519	42.5491	8.71119	1.9964	1.8584e-05	0.00066158
Cluster-34894.10810	35.7573	8.71494	1.7588	0.00016094	0.0038735
Cluster-34894.103973	39.3176	8.73003	1.8919	5.5419e-05	0.0016257
Cluster-34894.13380	41.7025	8.76652	1.9348	6.5167e-05	0.0018539
Cluster-34894.16474	32.7007	8.77537	1.6518	0.00033592	0.0069957
Cluster-34894.65059	36.4257	8.77537	1.8002	6.2108e-05	0.001779
Cluster-34894.27339	46.0985	8.78165	2.1282	6.5703e-07	3.9104e-05
Cluster-34894.11897	45.3422	8.81814	2.0948	1.3882e-06	7.442e-05
Cluster-34894.32665	35.3654	8.84836	1.7473	0.0001343	0.003354
Cluster-33476.2	35.1152	8.86092	1.7391	0.00014458	0.003563
Cluster-34894.14291	0	8.88604	-2.4425	0.00041704	0.0083227
Cluster-34894.30740	35.9857	8.8986	1.7156	0.00051139	0.0097825
Cluster-32401.0	34.1733	8.92135	1.6749	0.00041838	0.0083439
Cluster-34894.36549	36.5721	8.92135	1.7269	0.00049789	0.0095725
Cluster-34894.63617	37.6581	8.94647	1.8014	0.0001294	0.0032516
Cluster-34894.43877	40.7269	8.95903	1.9238	1.9974e-05	0.00070342
Cluster-34894.96289	38.3341	9.02202	1.769	0.00030415	0.0064522
Cluster-34894.12912	45.3935	9.03321	1.9492	0.000139	0.0034503
Cluster-34894.93415	59.9141	9.03711	2.3996	1.1884e-07	9.004e-06
Cluster-16718.0	33.6156	9.04086	1.6385	0.00044916	0.0088247
Cluster-34894.50166	37.9829	9.05342	1.8109	5.7213e-05	0.0016659
Cluster-34894.101476	60.2515	9.07108	2.4026	6.062e-08	4.9945e-06
Cluster-23495.0	43.3595	9.08992	1.9767	1.0344e-05	0.00040343
Cluster-34894.98268	36.8515	9.0962	1.753	0.00014165	0.0035022
Cluster-23808.0	37.5322	9.12013	1.797	5.1539e-05	0.0015304
Cluster-34894.99324	33.5266	9.12641	1.6329	0.00038479	0.0078078
Cluster-34894.27821	48.8994	9.1994	2.1494	4.7893e-07	2.9803e-05
Cluster-34894.78847	33.3368	9.21196	1.6321	0.00028579	0.0061523
Cluster-34894.42359	52.0025	9.22081	2.1695	1.7161e-06	8.9142e-05
Cluster-34894.1076	40.4868	9.24218	1.8672	4.6085e-05	0.001392
Cluster-34894.18035	35.0724	9.27867	1.6655	0.00038881	0.0078624
Cluster-34894.103684	40.557	9.28495	1.8884	1.8091e-05	0.0006474
Cluster-34894.17576	45.0722	9.29752	2.0297	3.0239e-06	0.00014303
Cluster-34894.102127	42.1268	9.31636	1.9034	3.6804e-05	0.0011612
Cluster-34894.15617	103.763	9.3617	3.1741	2.8447e-17	2.5517e-14
Cluster-34894.17291	127.483	9.38307	3.2564	3.9126e-12	1.0454e-09
Cluster-34894.71490	40.5853	9.38563	1.8579	2.8184e-05	0.00093323
Cluster-34894.41203	43.734	9.407	1.8833	0.00016278	0.0039097
Cluster-34894.23059	65.4361	9.41075	2.5061	1.5459e-09	2.0222e-07
Cluster-34894.99573	0	9.41328	-2.4256	0.00045997	0.0089892
Cluster-29870.0	65.6028	9.41331	2.1346	0.00025051	0.0055182
Cluster-34894.20150	59.5937	9.44606	2.352	7.3808e-08	5.9351e-06
Cluster-34894.78552	44.5328	9.48255	1.9089	7.3535e-05	0.0020464
Cluster-34894.35050	77.0504	9.48255	2.7072	8.8861e-11	1.6491e-08
Cluster-34894.93019	45.0417	9.50768	1.9939	3.873e-06	0.00017627
Cluster-34894.63262	33.9357	9.51396	1.6007	0.0005062	0.0096987
Cluster-34894.17019	34.1893	9.53161	1.6139	0.00040268	0.0080845
Cluster-34894.17316	35.8803	9.59323	1.666	0.00029607	0.0063169
Cluster-34894.12509	41.38	9.64485	1.8342	4.6002e-05	0.0013898
Cluster-34345.0	54.2206	9.66369	2.1702	1.5981e-06	8.3823e-05
Cluster-34894.91749	42.173	9.66878	1.8493	5.0616e-05	0.0015053
Cluster-34894.100795	36.0156	9.67878	1.6517	0.0004127	0.0082459
Cluster-34894.86786	60.4488	9.6939	2.3762	5.0336e-09	5.682e-07
Cluster-34894.35041	38.3404	9.71274	1.7235	0.00017585	0.004172
Cluster-34894.108385	36.6529	9.76061	1.6835	0.00014242	0.003519
Cluster-34894.14022	35.705	9.77945	1.6483	0.00019812	0.0045802
Cluster-18945.0	154.827	9.80339	3.4527	7.7353e-14	3.1251e-11
Cluster-34894.11503	54.0768	9.81595	2.2085	1.1186e-07	8.5567e-06
Cluster-34894.88212	80.4203	9.83241	2.3953	1.8182e-05	0.0006502
Cluster-34894.89826	33.6433	9.85872	1.5615	0.00046729	0.0091049
Cluster-34894.53806	46.9457	9.8701	2.0045	3.2281e-06	0.00015099
Cluster-34894.89204	44.0777	9.88894	1.9162	1.0086e-05	0.0003957
Cluster-34894.64791	40.6747	9.91287	1.7962	6.4536e-05	0.0018391
Cluster-34894.11547	45.3448	9.93799	1.9013	4.7234e-05	0.0014198
Cluster-34894.9365	37.8432	9.94684	1.6797	0.00021987	0.0049786
Cluster-34894.10312	38.2057	9.95565	1.7113	0.00014116	0.0034928
Cluster-34894.82431	43.1121	9.98077	1.88	1.7229e-05	0.00062126
Cluster-34894.47127	0	9.99333	-2.5644	0.00020582	0.0047186
Cluster-34894.100352	43.261	10.001	1.8161	0.00013224	0.003308
Cluster-34894.14032	44.2951	10.0689	1.9063	6.7556e-06	0.00028337
Cluster-29250.0	0	10.0865	-2.5725	0.00019626	0.0045485
Cluster-34894.63399	69.6209	10.0928	2.1762	0.00012737	0.0032092
Cluster-34894.11573	35.7041	10.1054	1.6111	0.00024068	0.0053477
Cluster-34894.13549	40.6485	10.1054	1.7824	3.8774e-05	0.0012128
Cluster-34894.99094	36.6554	10.1419	1.614	0.00050968	0.0097581
Cluster-31720.0	0	10.201	-2.4624	0.00037577	0.0076729
Cluster-34894.5550	48.4362	10.2149	2.0073	2.391e-06	0.00011767
Cluster-34894.26316	36.9673	10.2211	1.6415	0.000204	0.0046858
Cluster-34894.36475	0	10.2602	-2.4098	0.00050383	0.0096584
Cluster-34894.62355	38.2835	10.2979	1.6484	0.00032849	0.0068656
Cluster-34894.28260	36.1494	10.3067	1.598	0.00038829	0.0078593
Cluster-34894.80043	36.2529	10.3218	1.5842	0.00046045	0.0089972
Cluster-34894.36182	36.072	10.4011	1.5838	0.00032487	0.006808
Cluster-34894.96811	51.1644	10.4564	2.0669	4.2239e-07	2.6697e-05
Cluster-34894.103787	120.219	10.4678	3.2408	1.7843e-18	2.0525e-15
Cluster-34894.26933	42.1862	10.5118	1.7839	3.6474e-05	0.0011532
Cluster-34894.68011	66.0517	10.532	2.329	1.2083e-07	9.1364e-06
Cluster-34894.36172	40.9239	10.5345	1.6992	0.00028803	0.0061883
Cluster-34894.96049	45.4659	10.5508	1.8483	2.9705e-05	0.00097229
Cluster-34894.17801	41.8656	10.5533	1.7631	5.8434e-05	0.001695
Cluster-34894.88991	54.8482	10.5533	2.1375	2.972e-07	1.9773e-05
Cluster-34894.97151	43.3072	10.5797	1.755	0.00023616	0.00527
Cluster-34894.109255	41.2928	10.5936	1.7278	8.3415e-05	0.0022727
Cluster-34894.13199	68.2654	10.6138	2.3626	1.5247e-07	1.1219e-05
Cluster-23955.0	0	10.654	-2.6407	0.00012931	0.0032503
Cluster-34894.33930	37.3916	10.6552	1.5819	0.00048217	0.0093331
Cluster-34894.32540	45.8583	10.6754	1.7961	0.0002473	0.0054618
Cluster-34894.16837	40.8279	10.6842	1.6599	0.00050297	0.0096479
Cluster-34894.9913	37.5448	10.7219	1.5863	0.00044906	0.0088239
Cluster-20810.0	53.2198	10.7382	2.0081	1.9513e-05	0.00068994
Cluster-17321.0	0	10.7974	-2.501	0.00030207	0.0064202
Cluster-34894.49528	44.1482	10.8012	1.8233	1.1983e-05	0.00045668
Cluster-34894.56494	76.4175	10.8138	2.5711	4.0539e-11	8.403e-09
Cluster-34894.37206	45.1603	10.8377	1.8504	8.7259e-06	0.00035154
Cluster-34894.9679	37.0891	10.844	1.5603	0.0005113	0.0097825
Cluster-34894.10620	43.0737	10.9107	1.7777	2.5919e-05	0.00087554
Cluster-34894.279	0.321638	10.9195	-2.4371	0.00035822	0.0073694
Cluster-17405.0	0	10.9372	-2.4723	0.00035649	0.0073419
Cluster-34894.45852	0.305587	10.9484	-2.4509	0.00032925	0.0068797
Cluster-34894.47056	42.6605	10.9837	1.7368	8.7283e-05	0.0023618
Cluster-34894.5094	0	10.9874	-2.7438	6.5938e-05	0.0018695
Cluster-34894.6330	77.373	11	2.4785	1.8567e-08	1.8168e-06
Cluster-34894.70519	41.3211	11.0327	1.6671	0.00031871	0.006705
Cluster-34894.28238	46.2927	11.0453	1.7933	0.0001443	0.0035577
Cluster-34894.67420	42.0279	11.0604	1.7022	0.0001165	0.002981
Cluster-34894.64450	0.352796	11.0781	-2.4991	0.00023354	0.0052222
Cluster-34894.16272	43.3107	11.1573	1.7386	6.0131e-05	0.0017343
Cluster-34894.15292	46.9057	11.1813	1.824	4.5625e-05	0.0013819
Cluster-34894.101478	55.3781	11.1813	2.0388	4.2327e-06	0.00018995
Cluster-34894.18076	58.215	11.2189	2.1461	1.4595e-07	1.0808e-05
Cluster-34894.15714	38.033	11.2492	1.5684	0.00029259	0.0062674
Cluster-34894.8992	69.066	11.2743	2.3808	2.3314e-09	2.8907e-07
Cluster-34894.25547	52.3172	11.3284	1.9872	2.2927e-06	0.00011388
Cluster-34894.12137	58.131	11.37	2.0136	3.648e-05	0.0011532
Cluster-34894.15922	46.6338	11.4052	1.8207	1.2221e-05	0.00046436
Cluster-34894.72501	52.1693	11.4468	1.9521	4.7257e-06	0.00020877
Cluster-34894.29363	54.2918	11.4542	1.9594	1.7525e-05	0.00062999
Cluster-34894.99402	0.674435	11.4719	-2.3713	0.00036791	0.0075401
Cluster-34894.88489	48.1529	11.4833	1.8334	2.8252e-05	0.00093508
Cluster-25895.1	39.1064	11.4958	1.5701	0.00030451	0.0064586
Cluster-34894.12862	46.1281	11.4958	1.7749	5.3645e-05	0.0015817
Cluster-34894.37398	0	11.5109	-2.6093	0.00015922	0.0038409
Cluster-34894.67274	0.627226	11.5386	-2.3661	0.00039865	0.0080145
Cluster-34894.74316	53.6658	11.5637	1.9708	5.9057e-06	0.00025254
Cluster-34894.83417	41.3532	11.5788	1.6136	0.00027029	0.0058766
Cluster-34894.17971	40.9469	11.5876	1.6168	0.00023089	0.0051783
Cluster-14357.0	0	11.5939	-2.8169	4.0187e-05	0.0012481
Cluster-34894.16016	41.9619	11.6053	1.6254	0.00037675	0.0076909
Cluster-34894.95558	93.5828	11.6153	2.6348	5.2652e-09	5.9124e-07
Cluster-34894.97670	88.747	11.6455	2.6791	1.4258e-12	4.3025e-10
Cluster-28619.2	52.3377	11.6593	1.8969	2.7398e-05	0.00091465
Cluster-34894.25634	46.7506	11.7134	1.7951	1.2777e-05	0.00048161
Cluster-34894.36582	60.9291	11.7311	2.1575	5.0096e-08	4.2411e-06
Cluster-34894.75752	51.3051	11.7474	1.8847	2.429e-05	0.00082984
Cluster-34894.100981	47.5301	11.7613	1.796	2.8343e-05	0.00093747
Cluster-34894.25512	57.4946	11.7915	2.0514	9.2452e-07	5.2317e-05
Cluster-34894.99778	42.1069	11.7927	1.6435	9.9944e-05	0.0026367
Cluster-34894.19440	40.6152	11.799	1.568	0.00052114	0.0099371
Cluster-34894.13077	39.3576	11.8355	1.5475	0.00029437	0.0062949
Cluster-34894.46536	52.1114	11.8896	1.9302	2.3008e-06	0.00011416
Cluster-34894.90004	57.2324	11.8959	2.0671	1.653e-07	1.1987e-05
Cluster-34894.35505	68.2503	11.9589	2.193	1.463e-06	7.7629e-05
Cluster-34894.55677	0	11.974	-2.6988	9.0688e-05	0.0024382
Cluster-34894.97937	56.9187	11.9991	2.0141	2.1676e-06	0.00010874
Cluster-34894.16458	70.9779	12.0003	2.2838	1.414e-07	1.0518e-05
Cluster-34894.83423	58.0519	12.0142	2.0319	1.3871e-06	7.4388e-05
Cluster-34894.50774	43.4986	12.0419	1.6181	0.00048977	0.009455
Cluster-34894.45303	60.3062	12.047	2.0035	2.9291e-05	0.00096124
Cluster-34894.96652	53.3879	12.0519	1.941	1.4985e-06	7.9179e-05
Cluster-34894.48080	67.5796	12.0696	2.2728	2.9572e-09	3.5509e-07
Cluster-34894.46661	44.0138	12.0708	1.6635	0.00010597	0.0027644
Cluster-34894.15723	54.9643	12.0821	1.9707	1.375e-06	7.3975e-05
Cluster-34894.54418	0	12.0872	-2.8001	4.5872e-05	0.0013867
Cluster-34894.18001	73.8232	12.0921	2.3174	1.538e-07	1.13e-05
Cluster-34894.21077	42.2646	12.101	1.6103	0.00015424	0.0037458
Cluster-34894.29409	41.4183	12.1124	1.5936	0.00012923	0.003249
Cluster-25267.0	42.5642	12.1124	1.6332	7.6624e-05	0.0021215
Cluster-34894.14337	43.4149	12.13	1.6236	0.00026715	0.0058252
Cluster-34894.85329	99.5631	12.1426	2.8077	9.1715e-15	4.607e-12
Cluster-15271.0	48.4959	12.2344	1.7921	1.6586e-05	0.00060095
Cluster-34894.101008	54.2914	12.2344	1.9558	1.0173e-06	5.6903e-05
Cluster-34894.38300	0.627226	12.2395	-2.3646	0.00043315	0.008584
Cluster-34894.27736	49.4536	12.247	1.7063	0.00045377	0.0088933
Cluster-34894.40314	50.2247	12.2923	1.8072	2.4585e-05	0.0008384
Cluster-15149.0	50.6807	12.3225	1.8266	1.2489e-05	0.00047277
Cluster-34894.14398	47.9225	12.3414	1.7494	3.4278e-05	0.001093
Cluster-34894.34785	48.2583	12.3476	1.7681	1.8394e-05	0.00065607
Cluster-34894.41171	0.980022	12.3665	-2.2855	0.00046249	0.0090325
Cluster-34894.115	44.7817	12.3716	1.6704	4.9263e-05	0.0014715
Cluster-34894.78118	0.305587	12.3829	-2.5678	0.00016004	0.0038568
Cluster-29366.0	58.6354	12.3853	1.993	3.8273e-06	0.00017462
Cluster-34894.82354	65.1082	12.403	2.1788	2.6507e-08	2.4703e-06
Cluster-34894.58869	0	12.4332	-2.9441	1.607e-05	0.00058566
Cluster-34894.8046	51.8741	12.4446	1.8486	9.5434e-06	0.00037677
Cluster-34894.2545	42.2721	12.4571	1.5629	0.00039765	0.0080026
Cluster-34894.22594	45.9616	12.4748	1.6704	0.00013391	0.003346
Cluster-22706.0	43.825	12.5187	1.5825	0.00052085	0.0099338
Cluster-34894.15920	48.7292	12.5327	1.6913	0.00030932	0.0065421
Cluster-34894.9691	45.621	12.5829	1.6566	9.2412e-05	0.0024732
Cluster-34894.83640	46.8088	12.588	1.6812	9.4136e-05	0.0025094
Cluster-34894.92236	43.6324	12.6106	1.5951	0.00024554	0.0054325
Cluster-16764.0	44.5815	12.632	1.6038	0.0002966	0.0063247
Cluster-12597.1	58.7346	12.6371	1.9965	8.8112e-07	5.0126e-05
Cluster-34894.10101	65.1507	12.6434	2.14	7.6565e-08	6.1342e-06
Cluster-34894.48433	50.9882	12.6496	1.8078	1.1307e-05	0.00043524
Cluster-34894.32276	61.8358	12.6761	2.0509	1.3732e-06	7.3905e-05
Cluster-34894.27309	49.4706	12.6861	1.7807	7.2836e-06	0.00030187
Cluster-34894.90794	54.8954	12.7013	1.8515	2.8915e-05	0.00095187
Cluster-34894.17719	52.2599	12.7516	1.7635	0.00016499	0.0039534
Cluster-34894.29564	52.6303	12.7705	1.7646	0.00020332	0.0046721
Cluster-34894.49531	41.7186	12.8082	1.5297	0.00024709	0.0054588
Cluster-34894.69293	58.9901	12.8925	1.9728	2.3154e-06	0.00011482
Cluster-34894.86738	71.5007	12.8937	2.2779	1.2565e-09	1.6786e-07
Cluster-34894.69856	60.4944	12.9177	2.0135	1.0592e-06	5.8922e-05
Cluster-34894.105672	76.1868	12.9302	2.3545	5.2401e-10	7.8261e-08
Cluster-34894.34594	0.948864	12.9516	-2.327	0.00037087	0.0075893
Cluster-32623.0	46.7408	12.9553	1.6603	9.9966e-05	0.0026368
Cluster-34894.40039	0.611174	12.9642	-2.4782	0.00020085	0.0046291
Cluster-34894.15596	136.887	12.9793	3.1552	2.2535e-18	2.5342e-15
Cluster-34894.17744	98.1869	12.9844	2.679	2.8919e-12	8.0704e-10
Cluster-34894.10033	45.6283	13.0423	1.6037	0.00023951	0.0053289
Cluster-34894.82214	45.3875	13.0548	1.6232	6.4189e-05	0.0018313
Cluster-34894.19703	0	13.056	-2.9602	1.4509e-05	0.00053654
Cluster-34894.15250	58.4973	13.0699	1.9152	1.7234e-05	0.00062129
Cluster-34894.9923	49.4159	13.085	1.6902	0.00014842	0.0036356
Cluster-34894.46965	45.1235	13.1164	1.5918	0.00018932	0.0044196
Cluster-34894.84117	56.08	13.1367	1.8031	0.00013128	0.0032886
Cluster-34894.22527	51.093	13.2197	1.7759	8.5056e-06	0.00034474
Cluster-34894.46148	54.0812	13.2436	1.8388	6.4995e-06	0.00027435
Cluster-34894.104963	48.1019	13.2511	1.6615	0.00011687	0.0029874
Cluster-34894.24607	68.4901	13.2776	2.1629	1.316e-08	1.3409e-06
Cluster-30967.0	0	13.3103	-2.5203	0.00027342	0.005937
Cluster-34894.13942	71.7763	13.3166	2.1781	3.2385e-07	2.1251e-05
Cluster-34894.97235	82.3206	13.3191	2.1716	2.8983e-05	0.00095362
Cluster-34894.97660	123.095	13.3217	2.6467	4.0273e-07	2.564e-05
Cluster-34894.58826	56.8542	13.3769	1.8328	4.7702e-05	0.0014325
Cluster-33025.0	0.352796	13.3908	-2.6932	6.5325e-05	0.0018567
Cluster-34894.25592	48.4255	13.4059	1.6806	2.7041e-05	0.00090554
Cluster-34894.56264	0.627226	13.4147	-2.4959	0.00018145	0.004277
Cluster-34894.14773	56.835	13.4361	1.8891	1.9864e-06	0.00010093
Cluster-34894.81154	44.077	13.4487	1.5538	0.00011497	0.0029491
Cluster-34894.43538	70.1662	13.4537	2.1489	1.817e-07	1.2964e-05
Cluster-34894.97152	55.8121	13.4637	1.765	0.00027374	0.0059422
Cluster-16758.1	73.4915	13.5493	2.2048	3.7793e-08	3.3247e-06
Cluster-34894.71862	56.7503	13.5519	1.874	3.8107e-06	0.00017391
Cluster-34894.17385	45.7806	13.5619	1.572	0.00015699	0.0037998
Cluster-34894.91755	56.1517	13.6009	1.8652	2.6539e-06	0.00012794
Cluster-34894.23279	54.5445	13.6474	1.8164	3.688e-06	0.00016928
Cluster-34894.99614	53.6881	13.65	1.7306	9.7369e-05	0.0025814
Cluster-33829.0	0.305587	13.6613	-2.726	5.2958e-05	0.0015657
Cluster-34894.11566	70.7214	13.6651	2.1731	9.7585e-09	1.0262e-06
Cluster-34894.36797	51.4181	13.6714	1.7191	2.6988e-05	0.00090417
Cluster-34894.30332	66.6267	13.7281	1.9098	0.00014984	0.0036633
Cluster-34894.14905	60.3487	13.7859	1.9012	8.9892e-06	0.00035903
Cluster-34894.101381	56.022	13.7985	1.81	1.9879e-05	0.00070042
Cluster-34894.14205	63.8279	13.7985	2.0063	4.959e-07	3.0689e-05
Cluster-34894.98646	51.7451	13.8111	1.7285	1.6661e-05	0.00060297
Cluster-34894.5825	45.662	13.8299	1.567	8.7266e-05	0.0023618
Cluster-34894.52489	51.6384	13.8841	1.7059	4.3336e-05	0.001327
Cluster-33505.0	49.0668	13.8978	1.6346	0.00010967	0.0028428
Cluster-34894.12140	47.6824	13.908	1.5766	0.000348	0.0071987
Cluster-34894.74807	45.7387	13.9092	1.548	0.00022656	0.005098
Cluster-34894.31229	0.948864	13.918	-2.4061	0.0002199	0.0049786
Cluster-22213.1	51.2337	13.9394	1.7031	2.8874e-05	0.00095128
Cluster-34894.16000	60.9948	13.9394	1.9474	7.2162e-07	4.2296e-05
Cluster-34894.97377	71.0937	13.9457	2.155	2.7241e-08	2.5278e-06
Cluster-34894.67963	110.786	13.9571	2.7487	4.0785e-13	1.4129e-10
Cluster-34894.15997	47.3951	13.9734	1.584	0.00013384	0.0033449
Cluster-34894.58254	50.8091	13.9822	1.6666	0.00010377	0.0027157
Cluster-34894.80661	47.2575	13.9859	1.5883	8.5245e-05	0.0023129
Cluster-9512.1	55.747	13.9998	1.7751	4.8261e-05	0.0014461
Cluster-34894.28809	49.944	14.0438	1.6161	0.00020209	0.0046509
Cluster-34894.102496	65.2828	14.0452	1.9868	2.1895e-06	0.0001098
Cluster-34894.83063	52.0843	14.0514	1.6683	0.00016811	0.0040179
Cluster-34894.1162	63.3628	14.0665	1.9146	2.1765e-05	0.00075606
Cluster-34894.84966	53.037	14.0954	1.7503	5.3452e-06	0.00023213
Cluster-34894.56062	0	14.1017	-3.1201	4.1061e-06	0.00018554
Cluster-34894.13201	108.772	14.1182	2.6658	3.8517e-11	8.017e-09
Cluster-34894.15709	55.5386	14.1331	1.7811	1.481e-05	0.00054674
Cluster-34894.30338	47.672	14.137	1.5623	0.00029578	0.0063144
Cluster-34894.76993	76.6689	14.1496	2.2475	1.4701e-09	1.9348e-07
Cluster-34894.98763	45.9613	14.1861	1.5191	0.00033801	0.0070295
Cluster-34894.98266	55.0379	14.1935	1.7814	6.6845e-06	0.00028074
Cluster-34894.76198	79.6351	14.2049	2.3001	4.0773e-10	6.2889e-08
Cluster-34894.15622	76.9566	14.2226	2.0782	1.5939e-05	0.00058185
Cluster-34894.10182	56.9395	14.2363	1.8118	8.4766e-06	0.00034412
Cluster-34894.43016	50.4409	14.2514	1.6461	4.8626e-05	0.0014548
Cluster-34894.51294	69.078	14.2955	2.0498	7.668e-07	4.4477e-05
Cluster-34894.83426	85.1681	14.3056	2.3658	2.0065e-10	3.3672e-08
Cluster-34894.72801	0.321638	14.3358	-2.8691	1.6639e-05	0.00060261
Cluster-34894.102323	61.5654	14.347	1.8518	4.1804e-05	0.0012888
Cluster-34894.16831	58.3906	14.4037	1.8528	1.0977e-06	6.0656e-05
Cluster-34894.24253	73.3556	14.4139	1.9824	7.1345e-05	0.0019958
Cluster-34894.19407	51.6393	14.4151	1.664	4.217e-05	0.0012988
Cluster-34894.48533	55.015	14.4301	1.7161	0.00010333	0.0027052
Cluster-34894.15337	61.5151	14.4453	1.904	1.2934e-06	7.0085e-05
Cluster-34894.61301	1.33282	14.4527	-2.3209	0.00024328	0.0053929
Cluster-34894.65890	46.1768	14.5622	1.5151	0.00016352	0.0039237
Cluster-4270.2	50.6703	14.5836	1.5942	0.00023409	0.0052338
Cluster-34894.36278	101.281	14.6101	2.5383	2.5161e-10	4.0902e-08
Cluster-34894.100605	1.30166	14.6478	-2.3119	0.00028466	0.0061343
Cluster-34894.29553	50.625	14.6629	1.5747	0.00041882	0.0083484
Cluster-34894.47034	101.537	14.6629	2.4115	3.1911e-07	2.1003e-05
Cluster-34894.78560	55.0766	14.7473	1.7153	3.1601e-05	0.0010241
Cluster-34894.69422	0.305587	14.7522	-2.7921	3.3806e-05	0.0010816
Cluster-37016.0	54.7711	14.7598	1.6573	0.00024762	0.0054673
Cluster-34894.11416	289.599	14.7636	3.7667	3.1439e-17	2.7705e-14
Cluster-34894.20545	54.9073	14.7673	1.7194	1.857e-05	0.00066125
Cluster-34894.99070	52.3789	14.7724	1.6548	4.7192e-05	0.0014192
Cluster-34894.33039	52.9293	14.7938	1.6364	0.0002126	0.0048438
Cluster-34894.109466	66.153	14.8768	1.9727	3.0924e-07	2.0484e-05
Cluster-34894.98654	49.5849	14.8819	1.5711	0.00012643	0.0031897
Cluster-34894.15032	96.5863	14.9007	2.507	2.2269e-12	6.4041e-10
Cluster-34894.36279	61.2941	14.9033	1.8639	1.0323e-06	5.7615e-05
Cluster-34894.33912	47.532	14.9058	1.5033	0.00038987	0.0078787
Cluster-12834.0	63.7719	14.9096	1.9228	2.8887e-07	1.9321e-05
Cluster-34894.5705	50.3402	14.9158	1.5967	4.3153e-05	0.0013237
Cluster-34894.8460	72.4045	14.9221	2.0674	1.7532e-07	1.2579e-05
Cluster-34894.17721	48.782	15.0555	1.5423	0.00010102	0.0026595
Cluster-34894.69959	55.4015	15.1046	1.6958	2.7622e-05	0.00092007
Cluster-34894.36087	66.8998	15.1109	1.984	6.0267e-08	4.9709e-06
Cluster-34894.15715	85.1221	15.1234	2.3213	3.598e-11	7.5515e-09
Cluster-29694.0	0.352796	15.1462	-2.8274	2.4848e-05	0.00084541
Cluster-34894.32636	1.62235	15.1536	-2.1936	0.0005035	0.0096544
Cluster-34894.26911	49.165	15.1536	1.5545	6.189e-05	0.0017748
Cluster-34894.97414	54.6933	15.1725	1.6984	9.3034e-06	0.00036956
Cluster-34894.17004	78.7463	15.2329	2.1759	1.4069e-08	1.4217e-06
Cluster-34894.50037	59.8222	15.3085	1.7761	1.0938e-05	0.00042273
Cluster-34894.83989	67.1513	15.3185	1.9573	4.3605e-07	2.7448e-05
Cluster-34894.56324	1.34887	15.3336	-2.365	0.00018903	0.0044143
Cluster-34894.98909	49.2409	15.3701	1.5238	0.00015751	0.0038105
Cluster-34894.84377	62.2814	15.4003	1.8542	8.1953e-07	4.7209e-05
Cluster-34894.26520	50.919	15.4254	1.5598	0.00011019	0.0028551
Cluster-34894.10657	113.302	15.4368	2.6834	8.8031e-15	4.4666e-12
Cluster-34894.8715	55.3989	15.4972	1.6602	5.3492e-05	0.0015782
Cluster-17208.0	90.5353	15.5148	2.02	0.00026275	0.0057435
Cluster-34894.104660	49.3246	15.5223	1.5169	0.00015178	0.0037
Cluster-34894.24926	60.4601	15.5286	1.802	2.4187e-06	0.0001188
Cluster-34894.16446	57.3269	15.54	1.7058	2.8388e-05	0.00093874
Cluster-34894.32507	64.4542	15.54	1.8629	3.7064e-06	0.00016997
Cluster-34894.82896	51.2507	15.6016	1.5603	0.00010889	0.0028266
Cluster-34894.14781	116.959	15.6507	2.6867	2.2162e-13	8.2462e-11
Cluster-34894.4458	0.964915	15.6695	-2.4408	0.00020482	0.0046986
Cluster-34894.56121	783.511	15.7272	3.0858	5.3402e-06	0.00023198
Cluster-34894.14620	53.6598	15.7388	1.5948	0.00012214	0.0030955
Cluster-34894.87632	52.9196	15.74	1.5978	4.5631e-05	0.0013819
Cluster-34894.28931	0.321638	15.7716	-2.7808	3.8904e-05	0.001216
Cluster-34894.98942	50.5595	15.7816	1.5247	0.00016495	0.0039531
Cluster-34894.104524	54.5533	15.8369	1.6284	3.2543e-05	0.0010481
Cluster-34894.60927	0.321638	15.8432	-3.0185	4.7617e-06	0.00021
Cluster-34894.95924	0.980022	15.852	-2.6174	3.8958e-05	0.001217
Cluster-34894.21481	54.963	15.8697	1.6071	0.00011095	0.002871
Cluster-34894.15650	74.6349	15.886	1.9809	3.3132e-06	0.00015448
Cluster-34894.86946	67.0292	15.9162	1.9009	1.0782e-06	5.9778e-05
Cluster-34894.70051	0.658383	15.9552	-2.7829	1.8632e-05	0.00066297
Cluster-34894.61302	1.28561	16.0055	-2.4678	8.0203e-05	0.0021987
Cluster-34894.10112	78.9474	16.0949	1.9061	0.00023495	0.0052485
Cluster-34894.78551	101.011	16.0949	2.4263	2.3888e-10	3.9002e-08
Cluster-34894.11820	57.2708	16.105	1.6535	3.8167e-05	0.001197
Cluster-34894.14045	54.6433	16.1138	1.6067	4.512e-05	0.00137
Cluster-34894.12248	104.393	16.115	2.5269	5.7298e-14	2.3918e-11
Cluster-34894.16716	68.7472	16.1616	1.8218	8.1634e-05	0.0022337
Cluster-34894.14399	76.2157	16.1691	2.072	1.4139e-08	1.4242e-06
Cluster-34894.43138	54.4041	16.2282	1.5716	0.00013605	0.003391
Cluster-34894.84004	86.3968	16.2346	2.0514	3.0307e-05	0.0009892
Cluster-34894.48722	54.3994	16.3	1.5721	9.5918e-05	0.0025488
Cluster-34894.102600	52.2549	16.3037	1.5338	0.00012265	0.0031074
Cluster-34894.14435	56.321	16.3176	1.6057	0.00011712	0.0029913
Cluster-34894.34561	83.2697	16.3855	2.18	6.4889e-10	9.507e-08
Cluster-34894.9708	58.6436	16.3981	1.6972	4.1538e-06	0.00018702
Cluster-34894.55426	0.996073	16.4158	-2.6081	4.6784e-05	0.0014092
Cluster-32342.0	1.68561	16.4258	-2.2954	0.00023041	0.0051692
Cluster-34894.101674	58.4913	16.4397	1.643	8.9148e-05	0.0024034
Cluster-34894.25534	0.611174	16.4899	-2.828	1.3426e-05	0.00050287
Cluster-34894.23352	64.6478	16.539	1.7948	5.0236e-06	0.00022007
Cluster-34894.98549	75.8072	16.5718	2.0143	7.8446e-08	6.2647e-06
Cluster-34894.89318	102.859	16.6194	2.3996	1.0973e-09	1.4977e-07
Cluster-34894.23460	81.5995	16.6348	1.9955	1.4331e-05	0.00053139
Cluster-34894.76897	56.1892	16.6448	1.6099	2.2007e-05	0.00076289
Cluster-34894.68072	64.1662	16.7152	1.7527	2.5239e-05	0.00085643
Cluster-34894.109355	52.6414	16.7303	1.5029	0.00014861	0.0036396
Cluster-34894.41319	1.26956	16.748	-2.4336	0.00013886	0.0034474
Cluster-34894.83924	60.7516	16.7756	1.6576	0.00014036	0.0034778
Cluster-34894.13130	56.5759	16.8524	1.6062	2.6331e-05	0.00088609
Cluster-34894.34267	132.163	16.8612	2.7632	1.2155e-15	7.4763e-13
Cluster-34894.85432	57.1097	16.8775	1.6159	2.6197e-05	0.00088238
Cluster-34894.12301	59.4795	16.9152	1.6358	8.389e-05	0.0022821
Cluster-34894.7841	115.371	16.9165	2.5785	7.7082e-14	3.1225e-11
Cluster-34894.65178	74.2459	16.9467	1.962	1.3711e-07	1.0239e-05
Cluster-34894.97621	55.4675	16.9618	1.5557	0.00011613	0.0029736
Cluster-34894.80737	64.4092	16.9618	1.6784	0.00030992	0.00655
Cluster-34894.42997	0.321638	16.9656	-2.7463	5.3405e-05	0.0015761
Cluster-17437.0	72.8458	16.9707	1.906	1.6742e-06	8.7361e-05
Cluster-34894.101306	61.7486	16.9819	1.701	1.8337e-05	0.00065495
Cluster-34894.70289	57.0071	16.9844	1.6081	1.5449e-05	0.00056756
Cluster-34894.83060	61.5204	17.0021	1.7162	2.2681e-06	0.0001128
Cluster-34894.13879	76.5418	17.026	1.962	1.0974e-06	6.0656e-05
Cluster-34894.26831	83.8199	17.05	2.0754	3.2175e-07	2.1164e-05
Cluster-34894.60274	1.57609	17.0914	-2.3341	0.00020265	0.004661
Cluster-34894.44509	94.9472	17.1179	2.3093	2.2908e-11	5.0103e-09
Cluster-34894.17575	59.2406	17.1732	1.6518	8.1633e-06	0.00033276
Cluster-34894.12629	71.6734	17.1795	1.9153	9.4506e-08	7.3524e-06
Cluster-34894.100704	95.3645	17.2576	2.2773	9.6789e-10	1.3424e-07
Cluster-34894.87116	1.26956	17.3557	-2.4764	0.00010245	0.0026868
Cluster-34894.15357	63.296	17.3708	1.7124	7.1024e-06	0.00029533
Cluster-17331.0	1.02723	17.3771	-2.4997	0.0001458	0.0035849
Cluster-17055.1	80.898	17.4438	2.0517	1.4723e-08	1.4775e-06
Cluster-34894.18155	10505.7	17.5077	2.5642	0.00021111	0.0048166
Cluster-34894.75282	64.5977	17.5231	1.6542	0.00019451	0.0045137
Cluster-34894.59730	61.1774	17.5281	1.613	0.00015909	0.0038388
Cluster-34894.70554	77.5636	17.5482	1.994	2.8444e-08	2.6202e-06
Cluster-34894.88600	1.97515	17.577	-2.1799	0.00051593	0.009859
Cluster-34894.73615	61.9878	17.5859	1.6444	6.0001e-05	0.0017318
Cluster-34894.94885	112.238	17.5935	2.4894	7.5633e-13	2.4617e-10
Cluster-29709.0	1.91283	17.6488	-2.3245	0.00010729	0.0027936
Cluster-34894.53096	1.60725	17.7079	-2.3937	0.00011854	0.0030226
Cluster-34894.81648	1.34887	17.7483	-2.4062	0.00019559	0.004536
Cluster-34894.101068	1.68561	17.7495	-2.4051	9.5194e-05	0.0025322
Cluster-34894.90795	69.5573	17.7546	1.777	1.0708e-05	0.00041523
Cluster-34894.48204	0.611174	17.7595	-2.9167	6.4159e-06	0.00027105
Cluster-34894.11114	112.81	17.7799	2.1917	3.2105e-05	0.0010375
Cluster-34894.83682	60.2099	17.7885	1.6197	1.8441e-05	0.00065742
Cluster-34894.36344	1.2384	17.7935	-2.5015	8.8724e-05	0.0023944
Cluster-34894.50261	59.2762	17.8188	1.5871	4.7169e-05	0.0014188
Cluster-34894.80751	1.65446	17.8262	-2.4501	5.7136e-05	0.0016654
Cluster-34894.18835	67.1856	17.8388	1.76	3.4274e-06	0.00015872
Cluster-34894.42498	71.0251	17.8502	1.8498	3.3624e-07	2.1973e-05
Cluster-11153.0	1.92794	17.8716	-2.2683	0.00022809	0.005126
Cluster-34894.14414	82.8644	17.9118	2.0464	2.8159e-08	2.6017e-06
Cluster-34894.17604	57.511	17.9169	1.5309	0.00013628	0.0033963
Cluster-30681.0	61.4981	17.9194	1.6265	2.1729e-05	0.00075516
Cluster-34894.58247	151.28	17.9269	2.8932	4.6397e-19	6.0798e-16
Cluster-34894.67896	56.5954	17.9294	1.5221	9.1874e-05	0.0024628
Cluster-34894.7442	58.1401	17.9924	1.5387	0.00010013	0.0026402
Cluster-34894.29783	65.7228	18.0087	1.7028	8.22e-06	0.00033485
Cluster-34894.107576	64.982	18.0238	1.712	2.5928e-06	0.00012551
Cluster-34894.30408	60.5646	18.0515	1.5956	2.791e-05	0.00092687
Cluster-34894.79358	57.9597	18.0603	1.5392	7.0253e-05	0.0019696
Cluster-34894.59983	58.1983	18.0717	1.5408	8.2006e-05	0.0022412
Cluster-34894.29132	63.8333	18.0993	1.6324	0.00012948	0.0032521
Cluster-34894.81215	58.9866	18.1031	1.5754	2.0712e-05	0.00072584
Cluster-34894.56844	1.05839	18.1243	-2.3509	0.00047595	0.0092325
Cluster-34894.26884	61.3165	18.1245	1.6155	1.3711e-05	0.0005113
Cluster-34894.68364	74.2421	18.1282	1.8863	2.1835e-07	1.5226e-05
Cluster-34894.85211	1.94399	18.1371	-2.3411	9.959e-05	0.0026283
Cluster-34894.81506	98.1623	18.1396	2.2783	3.1105e-11	6.6564e-09
Cluster-34894.101477	70.8303	18.1735	1.7496	6.187e-05	0.0017745
Cluster-34894.31327	65.8537	18.1785	1.6703	6.6184e-05	0.0018754
Cluster-34894.88318	0.643277	18.1975	-2.7275	4.0641e-05	0.00126
Cluster-34894.14402	67.6265	18.2263	1.7227	1.6649e-05	0.00060272
Cluster-34894.102233	58.8658	18.2289	1.5192	0.00023811	0.0053048
Cluster-34894.85191	64.8794	18.2604	1.6521	6.4351e-05	0.0018345
Cluster-34894.24432	62.9788	18.3925	1.6416	7.4768e-06	0.00030878
Cluster-34894.80726	68.8992	18.4039	1.7399	8.146e-06	0.00033231
Cluster-30471.0	1.28561	18.4353	-2.6541	1.6402e-05	0.00059574
Cluster-34894.85230	64.9228	18.4404	1.6489	3.9502e-05	0.0012309
Cluster-34894.61006	1.38003	18.4944	-2.4303	0.00016933	0.0040407
Cluster-34894.38742	63.9	18.4944	1.6004	0.00021978	0.0049773
Cluster-34894.40536	0.321638	18.4944	-3.2238	7.5338e-07	4.3817e-05
Cluster-34894.99636	59.6557	18.5032	1.5162	0.00019748	0.0045684
Cluster-34894.93414	76.3885	18.5083	1.8302	1.0547e-05	0.0004098
Cluster-34894.97033	64.9839	18.5169	1.6293	0.00010212	0.0026801
Cluster-18690.0	2.61843	18.595	-2.1214	0.00031136	0.0065743
Cluster-34769.1	1.31677	18.6202	-2.5613	4.9628e-05	0.0014806
Cluster-34894.15356	76.0099	18.6429	1.8694	8.3543e-07	4.8015e-05
Cluster-34894.93413	88.1648	18.6606	2.0404	1.312e-07	9.8216e-06
Cluster-34894.12336	58.7711	18.6757	1.5117	9.4413e-05	0.0025155
Cluster-34894.101633	69.2498	18.731	1.7351	3.7547e-06	0.00017187
Cluster-34894.42378	1.96004	18.8719	-2.3944	5.9837e-05	0.0017281
Cluster-34894.59721	2.26563	18.8833	-2.2458	0.00016963	0.004046
Cluster-34894.74555	70.0504	18.9172	1.7443	1.9984e-06	0.00010146
Cluster-28528.0	1.89678	18.9259	-2.2615	0.00032572	0.0068191
Cluster-34894.80654	60.9335	18.9512	1.532	7.9613e-05	0.0021881
Cluster-29313.0	1.25445	18.9525	-2.5488	6.5705e-05	0.0018657
Cluster-34894.62579	65.5513	19.0128	1.5867	0.00028711	0.0061721
Cluster-34894.37618	2.58821	19.0154	-2.1022	0.00048407	0.0093628
Cluster-17148.0	145.251	19.0204	2.7507	1.3211e-16	1.0315e-13
Cluster-34894.55236	0.705592	19.0391	-2.7644	2.992e-05	0.000978
Cluster-34894.53435	0	19.0455	-2.9615	1.6358e-05	0.00059467
Cluster-34894.81981	99.8892	19.0909	2.1953	2.7292e-09	3.3211e-07
Cluster-34894.20944	70.2437	19.106	1.731	3.6663e-06	0.00016839
Cluster-34894.94555	69.4295	19.1186	1.71	7.9086e-06	0.00032377
Cluster-34894.9940	1.89773	19.1186	-2.2458	0.0003992	0.0080221
Cluster-34894.18117	74.4137	19.199	1.8066	1.0859e-06	6.0115e-05
Cluster-34894.80920	71.2401	19.2016	1.7409	2.3415e-06	0.00011582
Cluster-34894.69495	152.719	19.2016	2.7402	6.8927e-13	2.2728e-10
Cluster-34894.13846	82.6668	19.2041	1.9079	2.5002e-06	0.00012201
Cluster-34894.20904	0.611174	19.2055	-2.8208	2.0071e-05	0.00070635
Cluster-34894.92237	65.3077	19.2292	1.6345	8.5482e-06	0.000346
Cluster-34894.29511	78.8467	19.2557	1.8777	2.8422e-07	1.9061e-05
Cluster-34894.476	73.4897	19.2997	1.7785	1.3701e-06	7.3765e-05
Cluster-34894.32270	3.24565	19.3122	-1.9948	0.00045046	0.0088422
Cluster-34894.28893	68.7689	19.3262	1.6796	1.6242e-05	0.0005911
Cluster-34894.15883	66.34	19.3399	1.6094	9.8063e-05	0.0025966
Cluster-34894.21651	95.8593	19.3413	2.1593	2.0588e-10	3.4433e-08
Cluster-34894.13554	76.5628	19.3438	1.7631	4.5495e-05	0.0013793
Cluster-34894.17292	213.648	19.3552	3.06	3.1925e-12	8.7472e-10
Cluster-34894.38302	1.92889	19.379	-2.4385	4.0917e-05	0.0012677
Cluster-34894.27958	1.97609	19.4331	-2.4285	4.4726e-05	0.0013602
Cluster-34894.33051	67.6294	19.4368	1.6299	7.2245e-05	0.0020161
Cluster-34894.73042	62.9281	19.4508	1.5551	5.3002e-05	0.0015661
Cluster-34894.101380	63.3577	19.4784	1.5662	2.2545e-05	0.00077851
Cluster-34894.83943	217.361	19.4947	3.2342	5.9504e-20	9.1499e-17
Cluster-34894.47407	0.352796	19.5122	-2.9814	8.7505e-06	0.0003523
Cluster-34894.14775	86.0352	19.6042	1.9609	2.6618e-07	1.8011e-05
Cluster-34894.8368	66.2024	19.6091	1.5809	0.00013155	0.0032934
Cluster-34894.90947	63.8484	19.6244	1.5668	2.6544e-05	0.00089087
Cluster-34894.16125	78.4905	19.6305	1.7968	1.9879e-05	0.00070042
Cluster-34894.99338	106.174	19.6847	2.2502	1.1714e-09	1.5817e-07
Cluster-34894.14312	66.5426	19.686	1.6267	8.6584e-06	0.00034957
Cluster-34894.77477	69.2347	19.7125	1.626	8.5497e-05	0.0023193
Cluster-34894.15350	83.3153	19.7288	1.9454	1.2333e-08	1.2721e-06
Cluster-34894.75218	107.67	19.7653	2.2933	1.0519e-11	2.5003e-09
Cluster-34894.51231	282.737	19.7692	2.6581	2.5678e-05	0.00086896
Cluster-34894.41634	2.32889	19.7853	-2.2855	0.00012608	0.0031817
Cluster-34894.43168	68.3227	19.7867	1.6489	6.6094e-06	0.00027821
Cluster-34894.51753	2.541	19.8056	-2.1303	0.00046664	0.0090994
Cluster-34894.99254	74.8901	19.8093	1.7753	1.5593e-06	8.1986e-05
Cluster-34894.17789	1645.97	19.8546	5.8921	1.9831e-60	4.9807e-56
Cluster-34894.41407	65.3017	19.8672	1.5895	9.7632e-06	0.00038464
Cluster-34894.106397	2.55517	19.8735	-2.1974	0.0002018	0.0046453
Cluster-34894.51814	2.29679	19.9164	-2.2282	0.00027672	0.0059966
Cluster-34894.53524	82.8537	19.949	1.7905	9.3794e-05	0.0025039
Cluster-34894.1649	104.088	19.9515	2.2413	6.2783e-12	1.5768e-09
Cluster-25895.0	65.4424	19.9717	1.5532	0.00013952	0.0034608
Cluster-34894.27742	68.6106	19.9818	1.5678	0.00035546	0.0073257
Cluster-34894.15725	93.4328	19.9918	2.0723	6.6855e-09	7.2584e-07
Cluster-23931.0	2.89286	20.0057	-2.1246	0.00023345	0.0052211
Cluster-34894.12139	82.865	20.1012	1.8637	3.0191e-06	0.00014284
Cluster-34894.73583	2.92496	20.1378	-2.1332	0.00021023	0.0048
Cluster-34894.70441	83.913	20.1829	1.8206	3.3605e-05	0.0010759
Cluster-34894.1073	86.5859	20.1931	1.9048	3.3317e-06	0.00015497
Cluster-34894.99673	82.032	20.29	1.8623	3.5739e-07	2.3124e-05
Cluster-18295.0	1.22235	20.4209	-2.5483	8.4952e-05	0.0023075
Cluster-34894.43748	68.9508	20.48	1.6297	5.5618e-06	0.00024029
Cluster-34894.13939	75.2914	20.4876	1.7255	4.0425e-06	0.00018294
Cluster-34894.24271	0.352796	20.4976	-3.3552	1.9965e-07	1.4059e-05
Cluster-34894.12749	65.793	20.5102	1.5481	3.9867e-05	0.0012408
Cluster-34894.81283	65.6076	20.519	1.537	5.8742e-05	0.0017019
Cluster-34894.15344	90.094	20.5367	1.9808	1.9583e-08	1.9039e-06
Cluster-34894.40970	63.8572	20.5492	1.5125	2.7328e-05	0.00091291
Cluster-34894.104191	90.3581	20.5543	1.9714	7.4201e-08	5.9604e-06
Cluster-34894.71496	65.7461	20.5681	1.5618	6.8083e-06	0.00028507
Cluster-34894.32737	66.2965	20.7192	1.5249	0.00014315	0.0035322
Cluster-34894.52028	1.54399	20.7367	-2.3669	0.00028175	0.0060919
Cluster-34894.69630	1.60725	20.7455	-2.6729	7.3039e-06	0.00030254
Cluster-34894.59670	2.64958	20.768	-2.1465	0.00043371	0.0085929
Cluster-34894.15703	76.7545	20.8273	1.7581	2.0526e-07	1.442e-05
Cluster-34894.68963	68.4366	20.8424	1.5934	9.6407e-06	0.00038011
Cluster-34894.72954	1.57514	20.8473	-2.5152	6.3293e-05	0.0018091
Cluster-34894.13456	68.8413	20.8752	1.589	1.5839e-05	0.0005796
Cluster-34894.30717	3.58334	20.8852	-1.9929	0.00038253	0.0077773
Cluster-34894.83422	85.4148	20.9493	1.871	4.16e-07	2.6362e-05
Cluster-34894.30280	2.90891	20.9531	-2.169	0.00017177	0.0040901
Cluster-34894.78864	68.0319	20.9858	1.5686	1.7251e-05	0.00062178
Cluster-34894.15712	86.4842	20.9921	1.9193	5.7781e-09	6.426e-07
Cluster-34894.12610	90.8452	21.084	1.9726	6.52e-09	7.117e-07
Cluster-22263.0	1.89678	21.0991	-2.3524	0.00019773	0.0045729
Cluster-34894.21351	104.738	21.123	2.168	3.7279e-11	7.7917e-09
Cluster-34894.81982	66.5943	21.1281	1.5202	5.0108e-05	0.0014935
Cluster-34894.108101	3.30891	21.1695	-2.0923	0.00021489	0.0048849
Cluster-34894.40968	148.651	21.1756	2.4057	7.7111e-07	4.4676e-05
Cluster-34894.28345	79.8658	21.1771	1.7176	5.9913e-05	0.0017296
Cluster-34894.64313	93.1911	21.1986	1.9548	2.2677e-07	1.5733e-05
Cluster-34894.48534	116.119	21.2627	2.1879	4.1376e-07	2.6264e-05
Cluster-34894.106840	80.4411	21.2966	1.7785	1.1471e-06	6.3042e-05
Cluster-36750.0	118.424	21.3092	2.165	1.7859e-06	9.2353e-05
Cluster-34894.35042	117.353	21.3206	2.2744	2.3273e-10	3.8162e-08
Cluster-34894.22177	2.24958	21.3394	-2.4159	3.9887e-05	0.0012409
Cluster-34894.73510	2.84565	21.5106	-2.2333	9.1024e-05	0.0024455
Cluster-34894.78970	72.8555	21.5382	1.6347	5.4396e-06	0.0002354
Cluster-34894.24884	80.1267	21.5396	1.7478	2.0887e-06	0.00010541
Cluster-34894.76583	70.7186	21.5784	1.5958	4.7489e-06	0.00020968
Cluster-34894.100671	174.736	21.615	2.769	6.1356e-14	2.5471e-11
Cluster-34894.86045	3.48798	21.6212	-2.0275	0.00036846	0.0075495
Cluster-34894.33876	71.2593	21.6879	1.6064	2.5151e-06	0.00012266
Cluster-34894.10618	100.681	21.7081	2.0459	3.9983e-08	3.4868e-06
Cluster-34894.20197	72.6721	21.7384	1.595	2.2925e-05	0.00078965
Cluster-34894.11749	118.004	21.7484	2.2392	3.5437e-09	4.1655e-07
Cluster-34894.79588	70.6515	21.7535	1.5725	1.9602e-05	0.00069244
Cluster-34894.40744	83.3031	21.7621	1.7964	7.3165e-07	4.2784e-05
Cluster-34894.58796	1.33282	21.7647	-2.8568	2.4493e-06	0.00012011
Cluster-34894.76341	2.66658	21.7697	-2.1581	0.00047186	0.0091667
Cluster-34894.33566	85.7242	21.8063	1.847	3.4858e-08	3.1045e-06
Cluster-14170.2	0.611174	21.8189	-3.0213	3.6294e-06	0.0001669
Cluster-34894.40392	92.2092	21.8428	1.942	8.1915e-09	8.774e-07
Cluster-34894.97624	68.0511	21.8969	1.5152	2.8013e-05	0.0009292
Cluster-34894.51925	3.53519	21.9195	-2.0406	0.00031382	0.0066169
Cluster-34894.98727	135.567	21.9283	2.4909	4.3358e-16	2.9432e-13
Cluster-34894.78750	186.381	21.9407	2.7582	1.0422e-10	1.9014e-08
Cluster-34894.5266	110.052	21.9825	2.1858	2.2776e-11	4.9887e-09
Cluster-34894.35048	102.652	22.005	2.0609	4.6697e-09	5.3189e-07
Cluster-34894.58868	1.91283	22.0541	-2.5429	2.3162e-05	0.00079633
Cluster-34894.87933	2.61937	22.0667	-2.3148	7.7593e-05	0.0021422
Cluster-34894.14094	99.3822	22.1159	2.0065	3.9691e-08	3.4694e-06
Cluster-34894.82205	73.0352	22.1787	1.5738	2.9376e-05	0.00096316
Cluster-34894.33840	97.0224	22.2429	2.0028	4.8503e-10	7.3483e-08
Cluster-34894.86698	1.31677	22.2782	-2.8582	2.828e-06	0.00013516
Cluster-34894.27832	80.718	22.2907	1.7342	4.4663e-07	2.8045e-05
Cluster-34894.76759	1.97515	22.2908	-2.4267	0.00010166	0.0026717
Cluster-34894.90647	107.156	22.3461	2.0703	3.3791e-08	3.0292e-06
Cluster-34894.41050	2.94006	22.3549	-2.2809	5.2561e-05	0.0015552
Cluster-32590.0	2.81449	22.3938	-2.1641	0.0003473	0.007188
Cluster-34894.20340	75.044	22.4014	1.6329	2.076e-06	0.00010484
Cluster-34894.29695	96.681	22.4165	1.9506	1.7163e-07	1.2381e-05
Cluster-34894.96860	69.693	22.526	1.518	1.105e-05	0.00042641
Cluster-34894.97308	105.167	22.5272	2.0904	1.1827e-10	2.1264e-08
Cluster-36048.0	2.28074	22.5688	-2.4648	2.8007e-05	0.0009292
Cluster-34894.50917	3.19939	22.6467	-2.1132	0.00032629	0.0068291
Cluster-34894.64436	81.6936	22.6492	1.7318	3.4512e-07	2.2446e-05
Cluster-34894.43816	4.20962	22.6506	-1.9345	0.0004381	0.0086627
Cluster-34894.24435	74.3	22.6531	1.591	9.3206e-06	0.0003701
Cluster-34894.45714	99.2938	22.702	1.8671	4.1316e-05	0.0012771
Cluster-34894.43243	4.20962	22.7197	-1.9354	0.00044375	0.008747
Cluster-34894.96502	78.4914	22.7562	1.6438	1.0352e-05	0.00040363
Cluster-34894.99975	95.5235	22.7739	1.94	3.3916e-09	4.0149e-07
Cluster-34894.28076	2.24958	22.7901	-2.4761	2.6408e-05	0.00088788
Cluster-34894.12830	100.447	22.7966	1.9833	2.7775e-08	2.5679e-06
Cluster-34894.78747	132.745	22.8555	2.279	4.6396e-08	3.9703e-06
Cluster-34894.60220	0.643277	22.8606	-3.061	2.4971e-06	0.0001219
Cluster-34894.17880	72.363	22.8985	1.5352	1.5325e-05	0.00056381
Cluster-34894.84845	78.352	22.9073	1.6628	7.9183e-07	4.5736e-05
Cluster-34894.17380	93.5143	22.9136	1.9066	5.9737e-09	6.5901e-07
Cluster-34894.65425	3.95124	22.9412	-2.0373	0.00019532	0.004531
Cluster-34894.90646	91.1067	23.0054	1.857	7.2044e-08	5.815e-06
Cluster-34894.27701	70.2248	23.0305	1.5009	1.6096e-05	0.00058646
Cluster-34894.18296	2.86075	23.0344	-2.2586	0.00011096	0.002871
Cluster-34894.34549	79.0916	23.0344	1.6539	3.8806e-06	0.00017656
Cluster-34894.76196	78.239	23.0456	1.6406	2.3288e-06	0.0001154
Cluster-34894.44127	107.381	23.0809	2.077	5.1234e-10	7.6822e-08
Cluster-34894.56039	161.166	23.0811	2.4922	9.5876e-09	1.0111e-06
Cluster-34894.106436	72.1468	23.1426	1.5335	5.9849e-06	0.00025506
Cluster-34894.24417	77.1838	23.1916	1.6264	1.0231e-06	5.7206e-05
Cluster-34894.109134	3.38728	23.2055	-2.1092	0.000338	0.0070295
Cluster-34894.99200	85.5061	23.2332	1.7616	1.3997e-07	1.0422e-05
Cluster-34894.30099	78.7822	23.2583	1.6523	7.1522e-07	4.2019e-05
Cluster-34894.27648	114.722	23.2973	2.1492	7.4657e-10	1.0715e-07
Cluster-34894.20351	85.7147	23.3148	1.7446	1.1275e-06	6.2078e-05
Cluster-34894.18883	102.291	23.3176	1.9628	1.557e-07	1.1418e-05
Cluster-34894.49634	3.24565	23.3225	-2.2551	4.271e-05	0.0013119
Cluster-34894.103885	3.95124	23.3439	-2.0748	0.0001156	0.0029612
Cluster-34894.89396	94.8437	23.3578	1.8559	1.5353e-06	8.0868e-05
Cluster-34894.36780	84.1679	23.3653	1.7279	3.1245e-07	2.0653e-05
Cluster-34894.42615	2.58821	23.3755	-2.2734	0.0002033	0.0046721
Cluster-34894.87934	4.20962	23.379	-1.9493	0.00048312	0.0093459
Cluster-34894.65158	2.95612	23.3917	-2.3306	3.3778e-05	0.0010809
Cluster-34894.92350	2.58727	23.4306	-2.4328	2.0795e-05	0.00072827
Cluster-35241.0	78.2897	23.4319	1.5849	7.9029e-05	0.0021748
Cluster-34894.26752	99.2047	23.4447	1.8589	1.3754e-05	0.00051278
Cluster-34894.60304	125.069	23.5642	2.1933	2.3126e-08	2.1904e-06
Cluster-34894.34901	91.463	23.6019	1.8286	7.965e-08	6.3406e-06
Cluster-34894.76406	4.28893	23.6056	-1.9658	0.00034839	0.0072047
Cluster-34894.56173	23222.9	23.6331	3.6734	8.8253e-08	6.9267e-06
Cluster-30114.0	2.98727	23.6798	-2.3	6.0274e-05	0.0017377
Cluster-34894.39527	1.31677	23.7301	-2.8649	3.6916e-06	0.00016936
Cluster-34894.92009	1.2384	23.8232	-2.9602	1.0789e-06	5.9797e-05
Cluster-34894.73562	106.017	23.8295	1.9976	3.2815e-08	2.9593e-06
Cluster-34894.30269	113.616	23.8372	2.1254	2.3515e-11	5.1209e-09
Cluster-34894.43345	3.90404	23.9176	-2.1184	7.4192e-05	0.0020613
Cluster-33672.0	74.1993	23.9202	1.5182	1.1066e-05	0.00042693
Cluster-34894.31175	4.27288	23.9239	-2.0323	0.00012513	0.0031601
Cluster-34894.17120	74.2126	23.9404	1.518	1.7927e-05	0.00064184
Cluster-34894.12466	91.1492	23.9592	1.8148	2.656e-08	2.4718e-06
Cluster-34894.27433	91.4872	23.982	1.7191	7.3567e-05	0.0020465
Cluster-34894.102605	102.876	24.0673	1.9281	4.8486e-07	3.0105e-05
Cluster-34894.64839	82.9472	24.0725	1.671	5.0153e-07	3.1e-05
Cluster-34894.67304	87.0595	24.1127	1.7355	3.6036e-07	2.3256e-05
Cluster-12379.0	2.61843	24.1429	-2.4731	1.3867e-05	0.00051648
Cluster-34894.57696	2.32889	24.1706	-2.6042	4.663e-06	0.00020655
Cluster-34894.79586	90.0943	24.2084	1.7505	2.8571e-06	0.00013623
Cluster-34894.58734	2.0233	24.2233	-2.6262	1.1274e-05	0.00043429
Cluster-25024.0	2.94101	24.2285	-2.1548	0.00051474	0.0098386
Cluster-34894.39792	4.59358	24.2348	-1.9344	0.00037694	0.0076937
Cluster-18203.0	82.0949	24.2724	1.6244	6.8554e-06	0.00028688
Cluster-34894.71046	4.83779	24.275	-1.8988	0.00032202	0.0067641
Cluster-34894.20317	94.1135	24.2914	1.8354	3.3762e-08	3.0284e-06
Cluster-34894.75809	223.939	24.3066	3.0069	3.0995e-20	5.0224e-17
Cluster-34894.36518	2.90796	24.3142	-2.2529	0.00016865	0.0040295
Cluster-34894.78941	75.8667	24.3568	1.5191	2.063e-05	0.0007233
Cluster-34894.242	77.0931	24.3594	1.5248	3.8391e-05	0.0012028
Cluster-34894.75471	4.13126	24.416	-2.0126	0.00030318	0.0064376
Cluster-34894.49206	4.42079	24.4726	-1.9597	0.00034371	0.0071275
Cluster-34894.14142	97.8155	24.4978	1.8293	2.2554e-06	0.00011237
Cluster-34894.75732	3.19939	24.5405	-2.2811	5.1409e-05	0.0015271
Cluster-34894.86319	3.53519	24.5418	-2.1866	9.1689e-05	0.0024594
Cluster-34894.7322	3.93519	24.5456	-2.1357	7.2358e-05	0.0020183
Cluster-34894.94211	90.8707	24.5581	1.7761	5.6278e-08	4.6959e-06
Cluster-34894.22707	79.4875	24.5669	1.5755	1.1558e-05	0.00044308
Cluster-34894.46289	1.73282	24.6135	-2.7913	3.3517e-06	0.00015575
Cluster-22853.0	0.916761	24.6135	-3.0522	1.3589e-06	7.3212e-05
Cluster-34894.7298	3.56729	24.6209	-2.1769	0.00010861	0.0028219
Cluster-34894.29157	84.3143	24.6525	1.66	6.7945e-07	4.0247e-05
Cluster-34894.68323	2.95706	24.6715	-2.1834	0.0003963	0.0079839
Cluster-34894.98866	92.6208	24.6853	1.7956	4.4303e-08	3.8106e-06
Cluster-34894.47772	3.00333	24.7054	-2.2666	0.00013643	0.0033988
Cluster-34894.55012	2.69774	24.7796	-2.4274	3.2359e-05	0.0010435
Cluster-34894.64939	4.3352	24.7896	-2.0234	0.00021509	0.0048889
Cluster-34894.95541	110.335	24.8677	1.9989	2.2939e-08	2.1754e-06
Cluster-34894.98979	98.8003	24.8728	1.824	2.2754e-06	0.00011313
Cluster-34894.46607	103.937	24.991	1.9168	7.1643e-08	5.7888e-06
Cluster-34894.14783	200.847	24.9935	2.818	3.686e-17	3.2294e-14
Cluster-34894.45715	78.0757	25.0653	1.5042	8.1732e-05	0.0022353
Cluster-34894.22488	186.563	25.1168	2.5614	3.5314e-09	4.155e-07
Cluster-34894.72118	1.94399	25.1595	-2.7665	1.8202e-06	9.3677e-05
Cluster-34894.55310	3.52008	25.1821	-2.2047	9.3395e-05	0.0024941
Cluster-34894.9314	84.2104	25.2753	1.6159	6.4736e-06	0.00027334
Cluster-34894.66963	78.6683	25.2855	1.5139	2.648e-05	0.00088972
Cluster-34894.24982	85.6499	25.2879	1.6321	9.0043e-06	0.00035944
Cluster-34894.74878	209.681	25.3144	2.9176	9.9658e-25	2.6818e-21
Cluster-34894.45419	2.7289	25.3495	-2.3885	6.4552e-05	0.0018392
Cluster-34894.99654	77.9089	25.3534	1.5037	1.6755e-05	0.00060621
Cluster-34894.83329	82.3932	25.4088	1.5287	0.00015088	0.0036827
Cluster-34894.49717	104.535	25.4642	1.8638	1.6865e-06	8.7939e-05
Cluster-34894.57805	4.68799	25.4766	-1.9788	0.00026856	0.0058466
Cluster-34894.11728	86.6979	25.5445	1.6404	3.258e-06	0.00015214
Cluster-34894.81524	94.5123	25.5647	1.7593	7.0033e-07	4.1273e-05
Cluster-34894.73250	82.9261	25.6126	1.584	2.4086e-06	0.00011842
Cluster-34894.89488	78.3885	25.6163	1.517	4.1387e-06	0.00018651
Cluster-34894.12706	88.0008	25.707	1.6682	5.6712e-07	3.4516e-05
Cluster-34894.87616	85.5014	25.7272	1.5718	0.00011404	0.0029312
Cluster-34894.32376	3.84077	25.7447	-2.1631	9.7737e-05	0.0025894
Cluster-34894.39487	5.18964	25.8126	-1.8982	0.0002934	0.0062795
Cluster-34894.40116	81.907	25.8126	1.556	9.4547e-06	0.00037435
Cluster-34894.85599	89.4737	25.8239	1.6847	5.9468e-07	3.5947e-05
Cluster-34894.107163	3.85777	25.8442	-2.2011	4.5797e-05	0.0013852
Cluster-34894.77385	82.1264	25.8769	1.5141	0.00011921	0.0030361
Cluster-34894.56519	5.44802	25.8818	-1.8581	0.0003056	0.0064772
Cluster-34894.36640	148.296	25.8932	2.3881	6.1294e-15	3.2184e-12
Cluster-34894.100208	91.1216	25.9058	1.7062	1.786e-07	1.2786e-05
Cluster-34894.100528	80.0785	26.0555	1.5233	2.4749e-06	0.00012101
Cluster-34894.64717	95.6811	26.0643	1.7617	1.6327e-07	1.1857e-05
Cluster-34894.44453	3.7794	26.0681	-2.1479	0.00015656	0.0037911
Cluster-34894.71835	137.782	26.1197	2.2525	3.1322e-12	8.6133e-10
Cluster-34894.49854	85.2509	26.1713	1.5961	1.7433e-06	9.042e-05
Cluster-34894.55832	4.62473	26.1876	-1.9813	0.00037839	0.0077171
Cluster-34894.73528	4.16336	26.1966	-2.0297	0.00044544	0.0087757
Cluster-34894.11265	89.4416	26.2015	1.6691	2.6267e-07	1.7806e-05
Cluster-34894.20155	96.0902	26.2141	1.7424	9.1959e-07	5.2136e-05
Cluster-34894.84689	119.652	26.228	2.0428	5.8744e-09	6.5091e-07
Cluster-34894.50285	117.124	26.36	2.0411	3.8825e-11	8.07e-09
Cluster-11213.1	4.96242	26.3738	-1.9794	0.00017717	0.004196
Cluster-34894.21677	111.894	26.3928	1.9592	1.6788e-09	2.1715e-07
Cluster-14514.0	3.7152	26.4405	-2.1174	0.00030414	0.0064522
Cluster-34894.41420	96.6272	26.4431	1.7591	4.7968e-08	4.0862e-06
Cluster-34300.0	2.13911	26.4607	-2.5178	4.7055e-05	0.0014165
Cluster-34894.33974	90.0541	26.467	1.6552	6.3167e-07	3.7804e-05
Cluster-34894.98645	101.486	26.4835	1.7908	1.0124e-06	5.6677e-05
Cluster-34894.46214	1.89773	26.5047	-2.823	1.2163e-06	6.646e-05
Cluster-34894.37207	90.5837	26.5223	1.6724	1.8662e-07	1.3259e-05
Cluster-34894.77072	4.38963	26.5739	-2.0445	0.00022088	0.0049992
Cluster-34894.2141	1.38003	26.604	-2.387	0.00042566	0.0084601
Cluster-34894.82360	95.5442	26.6055	1.7076	2.8323e-06	0.00013528
Cluster-34894.98323	117.568	26.6118	2.0041	4.8852e-09	5.531e-07
Cluster-34894.14909	98.1665	26.6155	1.7377	3.4669e-06	0.00016021
Cluster-34894.40315	98.732	26.6168	1.7031	2.5363e-05	0.00085965
Cluster-34894.88036	4.80664	26.6972	-1.9997	0.00018691	0.0043798
Cluster-34894.70841	275.665	26.7113	2.9005	1.0202e-09	1.4027e-07
Cluster-34894.88587	4.90011	26.7274	-2.036	7.2237e-05	0.0020161
Cluster-34894.82141	5.54244	26.755	-1.8846	0.00025107	0.0055257
Cluster-34894.59492	117.946	26.8118	2.0091	7.6533e-10	1.0953e-07
Cluster-34894.83191	95.8165	26.8647	1.6909	5.3086e-06	0.00023074
Cluster-34894.99089	136.244	26.8696	2.2194	2.131e-12	6.1403e-10
Cluster-34894.104298	4.43684	26.8808	-2.0643	0.00016138	0.0038817
Cluster-34894.92239	3.87193	26.881	-2.1759	0.00011557	0.0029608
Cluster-34894.56301	171.211	26.9073	2.5009	6.2538e-14	2.5819e-11
Cluster-34894.15889	97.1417	26.9817	1.7395	1.1522e-07	8.7694e-06
Cluster-34894.71831	138.931	26.9817	2.1797	2.3316e-09	2.8907e-07
Cluster-34894.27247	2.63448	26.9991	-2.5858	5.4543e-06	0.00023585
Cluster-34894.35043	104.077	27.0131	1.8029	2.7889e-07	1.8737e-05
Cluster-34894.61563	2.61843	27.0282	-2.5863	5.6354e-06	0.00024305
Cluster-34894.5093	1.5912	27.0784	-2.9292	9.7868e-07	5.503e-05
Cluster-34894.46732	88.0654	27.0798	1.5947	2.5735e-06	0.0001249
Cluster-34894.27823	145.73	27.11	2.2991	2.4968e-13	9.0664e-11
Cluster-34894.103705	105.999	27.12	1.8653	9.0981e-10	1.2718e-07
Cluster-34894.96308	55478.5	27.175	2.89	3.032e-05	0.00098939
Cluster-34894.96380	101.461	27.2132	1.7729	4.0809e-07	2.5959e-05
Cluster-34894.76742	90.5686	27.2181	1.6367	3.8404e-07	2.4574e-05
Cluster-34894.86756	89.9518	27.2434	1.5934	1.7055e-05	0.00061603
Cluster-34894.82335	0.611174	27.2737	-3.0728	3.4063e-06	0.00015794
Cluster-34894.88456	136.531	27.3743	2.172	1.5939e-10	2.7641e-08
Cluster-34894.73823	131.51	27.3804	2.1338	2.7963e-11	6.0285e-09
Cluster-31952.0	0.611174	27.3818	-3.5279	1.0467e-08	1.0921e-06
Cluster-34894.100733	162.113	27.4332	2.2721	2.7847e-07	1.8725e-05
Cluster-34894.62690	1.26956	27.452	-3.0396	7.6029e-07	4.4185e-05
Cluster-34894.45002	172.426	27.4535	2.4577	2.401e-12	6.8527e-10
Cluster-34894.23112	125.517	27.4913	2.0675	1.8839e-10	3.1863e-08
Cluster-34894.89547	97.8703	27.5064	1.7208	1.8916e-07	1.3414e-05
Cluster-34894.99672	102.764	27.5138	1.7977	1.1857e-08	1.2247e-06
Cluster-34894.8199	0	27.5654	-3.3948	5.5637e-07	3.3944e-05
Cluster-34894.99559	137.754	27.5793	2.1088	1.7324e-07	1.2462e-05
Cluster-34894.13583	147.97	27.6071	2.2301	1.6176e-09	2.1032e-07
Cluster-34894.41415	6.4441	27.6447	-1.7772	0.00031505	0.0066391
Cluster-34894.79824	105.662	27.6535	1.8312	4.7312e-09	5.3727e-07
Cluster-34894.51824	4.96337	27.7077	-2.0441	9.7145e-05	0.0025769
Cluster-34894.99683	126.942	27.724	2.0061	1.2424e-07	9.3751e-06
Cluster-34894.72213	108.136	27.7316	1.8433	4.1332e-08	3.592e-06
Cluster-34894.54072	4.83779	27.7428	-2.0861	4.8564e-05	0.0014537
Cluster-34894.15711	141.542	27.8323	2.2154	2.9174e-12	8.105e-10
Cluster-19097.0	95.5448	27.8348	1.6299	2.7778e-05	0.00092425
Cluster-29673.0	6.82899	27.8989	-1.7216	0.00050051	0.0096093
Cluster-34894.72144	93.3893	27.9204	1.5984	3.6726e-05	0.0011593
Cluster-34894.105470	6.66409	27.9555	-1.7489	0.00051747	0.0098834
Cluster-34894.65597	101.549	27.9744	1.7627	1.7504e-08	1.7286e-06
Cluster-34894.45109	3.56729	27.9769	-2.4195	4.475e-06	0.00019904
Cluster-34894.31620	88.0008	27.982	1.5436	5.5841e-06	0.00024111
Cluster-34894.9945	92.7471	28.0248	1.6115	2.5338e-06	0.00012345
Cluster-34894.52870	3.2617	28.0324	-2.4063	2.1514e-05	0.00074943
Cluster-34894.30100	90.9834	28.0713	1.6018	7.2985e-07	4.2696e-05
Cluster-34894.10920	118.029	28.1959	1.9512	6.6717e-10	9.7233e-08
Cluster-34894.47040	4.068	28.2375	-2.1468	0.00016797	0.0040152
Cluster-34894.92097	88.9296	28.2413	1.534	1.437e-05	0.00053243
Cluster-34894.69154	5.94339	28.2473	-1.8709	0.00029179	0.0062538
Cluster-34894.34898	91.3456	28.328	1.5864	1.4844e-06	7.8599e-05
Cluster-34894.19108	113.503	28.3293	1.8822	1.4076e-08	1.4217e-06
Cluster-34894.67421	95.8139	28.3368	1.6149	2.408e-05	0.00082377
Cluster-34894.66653	6.85921	28.3582	-1.7378	0.00044096	0.0087067
Cluster-34894.32482	1.89678	28.3633	-2.7632	5.673e-06	0.00024446
Cluster-34894.96484	5409.45	28.3694	7.0032	1.0564e-84	7.9593e-80
Cluster-34671.1	91.8637	28.3984	1.5997	6.6037e-07	3.9225e-05
Cluster-34894.17125	134.837	28.3985	2.1172	1.8111e-11	4.0794e-09
Cluster-34894.30534	99.165	28.4274	1.6942	3.9212e-07	2.5038e-05
Cluster-14772.1	4.97847	28.4652	-2.0894	5.7198e-05	0.0016659
Cluster-34894.61274	148.055	28.4991	2.2691	3.9742e-15	2.1938e-12
Cluster-34894.75951	91.1052	28.5067	1.5609	1.1383e-05	0.00043782
Cluster-34894.95921	5.41686	28.5821	-1.9768	0.00013157	0.0032934
Cluster-34894.60368	1.92794	28.6664	-2.852	1.4e-06	7.492e-05
Cluster-34894.85990	99.6896	28.679	1.6967	8.436e-08	6.6663e-06
Cluster-34894.97958	157.571	28.7155	2.3365	2.3007e-15	1.3233e-12
Cluster-34894.3786	6.24803	28.7469	-1.858	0.00021367	0.0048624
Cluster-34894.66305	124.592	28.7585	1.9553	1.0965e-07	8.4175e-06
Cluster-34894.41960	2.63448	28.7921	-2.5337	2.2686e-05	0.00078248
Cluster-34894.40969	283.125	28.8209	2.2627	0.00038533	0.0078141
Cluster-34894.110144	6.05291	28.8678	-1.8833	0.00027066	0.0058838
Cluster-34894.46905	2.36005	28.8843	-2.7669	1.4188e-06	7.579e-05
Cluster-34894.28309	5.87918	29.0377	-1.9158	0.00019185	0.0044625
Cluster-34894.55678	7.18179	29.0528	-1.7228	0.0003967	0.0079898
Cluster-34894.5388	4.7201	29.0564	-2.0726	0.00022777	0.0051207
Cluster-34894.52209	4.86895	29.2037	-2.1347	3.518e-05	0.001118
Cluster-26628.0	137.293	29.2063	2.1131	1.0966e-11	2.5942e-09
Cluster-34894.99968	156.626	29.2454	2.2114	6.5364e-09	7.1273e-07
Cluster-34894.14404	136.396	29.2905	2.0782	1.6594e-09	2.152e-07
Cluster-34894.13200	191.178	29.3385	2.5415	1.556e-14	7.4916e-12
Cluster-34894.83200	109.821	29.4341	1.7938	1.4046e-08	1.4214e-06
Cluster-34894.74971	2.63353	29.4364	-2.59	1.1606e-05	0.00044446
Cluster-34894.75696	4.51521	29.4604	-2.2355	1.3914e-05	0.00051797
Cluster-34894.96654	145.714	29.5034	2.1311	3.466e-09	4.0901e-07
Cluster-34894.14995	98.9523	29.5157	1.6473	2.8051e-07	1.8838e-05
Cluster-34894.55783	102.442	29.5434	1.6828	7.7278e-07	4.4738e-05
Cluster-34894.45300	109.999	29.5562	1.7519	1.0683e-06	5.9337e-05
Cluster-34894.20041	3.37123	29.5563	-2.3121	0.00011996	0.003049
Cluster-34894.75871	132.765	29.5801	2.0349	7.4626e-10	1.0715e-07
Cluster-34894.30267	121.197	29.5938	1.9196	1.7992e-09	2.3095e-07
Cluster-34894.99039	213.911	29.6078	2.7111	7.72e-20	1.1634e-16
Cluster-34894.36614	132.269	29.6103	1.9375	5.058e-06	0.00022138
Cluster-34894.97514	93.6153	29.7159	1.5226	4.4573e-05	0.0013572
Cluster-34894.73033	2.06957	29.7182	-2.6058	3.9202e-05	0.0012241
Cluster-34894.19062	138.139	29.7221	2.1117	1.9158e-12	5.6059e-10
Cluster-34894.14481	90.3061	29.7675	1.5114	1.8583e-06	9.5413e-05
Cluster-34894.38476	4.67383	29.79	-2.1496	8.2256e-05	0.0022468
Cluster-34894.81217	91.496	29.814	1.5194	2.8631e-06	0.00013641
Cluster-34894.10801	5.83292	29.8593	-2.0022	3.9973e-05	0.0012428
Cluster-34896.0	101.33	29.8744	1.6501	1.5121e-06	7.9811e-05
Cluster-34894.78854	4.78336	29.9084	-2.068	0.00029503	0.0063045
Cluster-34894.78539	6.27919	29.9776	-1.8987	0.00017378	0.0041306
Cluster-34894.66164	3.58334	29.9876	-2.5023	1.8358e-06	9.4356e-05
Cluster-34894.72145	163.438	30.0167	2.307	7.8297e-13	2.5352e-10
Cluster-34894.85483	3.66076	30.1751	-2.4267	1.0202e-05	0.000399
Cluster-34894.26440	93.3205	30.2268	1.531	2.9835e-06	0.00014147
Cluster-34894.44658	110.055	30.3575	1.6339	0.00032272	0.0067721
Cluster-34894.16651	107.805	30.3602	1.7016	1.6952e-06	8.8272e-05
Cluster-34894.94564	157.945	30.3966	2.204	4.0682e-10	6.2859e-08
Cluster-34894.24538	108.924	30.4521	1.717	8.1026e-07	4.6728e-05
Cluster-34894.90725	157.151	30.5125	2.1905	9.7503e-10	1.348e-07
Cluster-34894.28196	113.096	30.5212	1.7831	1.6053e-08	1.5946e-06
Cluster-26870.2	4.86801	30.5703	-2.2126	1.2763e-05	0.00048144
Cluster-34894.54443	129.724	30.5804	1.9114	7.0306e-07	4.1402e-05
Cluster-34894.16562	127.742	30.6169	1.9339	4.1937e-09	4.85e-07
Cluster-34894.8941	4.21057	30.6446	-2.2995	2.1952e-05	0.00076188
Cluster-34894.41275	98.6558	30.6495	1.569	9.2e-06	0.00036629
Cluster-34894.14311	93.6638	30.6509	1.5096	9.6041e-06	0.00037877
Cluster-23479.1	117.181	30.696	1.8252	1.6797e-08	1.6641e-06
Cluster-34894.94175	103.835	30.7174	1.6384	4.1119e-06	0.00018569
Cluster-34894.50908	110.727	30.7464	1.7561	4.6055e-09	5.2617e-07
Cluster-34894.78744	109.125	30.8268	1.6058	0.0003245	0.0068032
Cluster-34894.15921	129.254	30.8371	1.9621	1.4104e-10	2.4688e-08
Cluster-34894.70714	133.642	30.8761	1.9807	6.6401e-09	7.2299e-07
Cluster-34894.15239	206.124	30.8773	2.6044	1.525e-17	1.4363e-14
Cluster-34894.91568	100.535	30.8887	1.5871	7.1178e-06	0.00029589
Cluster-34894.7650	121.433	30.9187	1.8092	3.3239e-06	0.00015474
Cluster-34894.79321	1.36398	30.958	-2.6911	5.0152e-05	0.0014939
Cluster-34894.58131	96.0154	30.988	1.546	4.1866e-07	2.6484e-05
Cluster-34894.12112	103.782	31.017	1.6164	9.4803e-06	0.00037515
Cluster-34894.89426	7.19784	31.0785	-1.7739	0.00042585	0.0084627
Cluster-34894.60187	115.549	31.1177	1.7854	4.1738e-08	3.6147e-06
Cluster-34894.82981	5.65291	31.164	-2.0212	0.00013425	0.0033533
Cluster-34894.27484	113.345	31.1956	1.7734	2.2917e-09	2.8495e-07
Cluster-34894.40443	7.3297	31.2258	-1.7728	0.00026436	0.0057703
Cluster-34894.101654	101.912	31.2335	1.6028	8.8458e-07	5.0302e-05
Cluster-34894.98507	5.04802	31.2975	-2.1267	6.5039e-05	0.001851
Cluster-34894.62093	100.97	31.3328	1.5978	2.3444e-07	1.6175e-05
Cluster-34894.34275	148.023	31.353	2.1341	6.7546e-13	2.2322e-10
Cluster-34894.47755	6.10735	31.373	-1.9915	5.3376e-05	0.0015756
Cluster-34894.31636	7.11758	31.4007	-1.8165	0.00021712	0.0049283
Cluster-34894.18167	7.29226	31.4209	-1.7919	0.00029295	0.0062733
Cluster-34894.23478	7.76181	31.436	-1.7476	0.00017449	0.0041456
Cluster-34894.109189	5.92828	31.4548	-2.0325	4.8322e-05	0.0014472
Cluster-34894.41609	95.9301	31.4901	1.5204	1.4528e-06	7.7224e-05
Cluster-34894.95308	5.55849	31.5629	-2.0821	4.9019e-05	0.0014646
Cluster-34894.21058	5.26801	31.567	-2.0604	0.00018825	0.004403
Cluster-34894.41344	5.74638	31.602	-1.9832	0.0003048	0.0064638
Cluster-34894.69812	128.973	31.6399	1.9266	1.068e-10	1.9437e-08
Cluster-34894.50527	0.305587	31.6826	-3.2382	1.5167e-06	8.0026e-05
Cluster-34894.109091	6.10641	31.7278	-1.9331	0.00026973	0.0058705
Cluster-34894.75765	120.94	31.7633	1.772	2.3124e-06	0.0001147
Cluster-34894.96808	133.263	31.7684	1.8558	9.1419e-06	0.00036407
Cluster-34894.60924	136.937	31.7796	1.9966	1.1865e-10	2.1285e-08
Cluster-34894.107471	2.94101	31.8082	-2.6038	7.0682e-06	0.00029417
Cluster-34894.56292	3.2466	31.8159	-2.6076	1.9633e-06	9.9916e-05
Cluster-34894.37204	166.435	31.8261	2.2663	2.1919e-14	1.007e-11
Cluster-34894.19751	126.567	31.8802	1.8755	3.0564e-09	3.6553e-07
Cluster-34894.78553	153.51	31.889	2.1507	2.4138e-12	6.8761e-10
Cluster-34894.38447	6.74968	31.9758	-1.9107	7.6056e-05	0.0021069
Cluster-34894.72130	7.10153	31.9795	-1.8305	0.00023495	0.0052485
Cluster-34894.15299	122.204	32.0147	1.8234	1.7546e-08	1.7315e-06
Cluster-34894.14794	5.28406	32.0247	-2.0958	0.00011177	0.0028875
Cluster-34894.50495	4.59452	32.07	-2.2941	1.3344e-05	0.00050008
Cluster-34894.23486	99.9033	32.0891	1.5224	1.0089e-05	0.0003957
Cluster-34894.93797	103.317	32.0967	1.5691	6.1917e-06	0.00026254
Cluster-34894.96812	213.403	32.1231	2.5719	2.5729e-15	1.4639e-12
Cluster-34894.64851	8.13065	32.1242	-1.6983	0.00043737	0.0086506
Cluster-34894.54237	7.18179	32.1319	-1.7979	0.00046641	0.0090961
Cluster-34894.15152	1530.54	32.157	3.9309	1.9185e-10	3.2375e-08
Cluster-34894.38305	5.30106	32.1607	-2.1411	4.7216e-05	0.0014196
Cluster-34894.78956	124.089	32.2238	1.8035	4.7324e-07	2.9493e-05
Cluster-34894.77894	6.23293	32.3771	-2.0186	4.0644e-05	0.00126
Cluster-36520.1	7.14874	32.4238	-1.8343	0.0002676	0.0058323
Cluster-34894.22526	120.25	32.4363	1.7969	5.2212e-09	5.8716e-07
Cluster-34894.101442	1257.32	32.5076	2.5196	0.00026339	0.0057558
Cluster-34894.36187	104.085	32.5546	1.5811	1.1242e-06	6.1955e-05
Cluster-34894.21800	8.24018	32.557	-1.7165	0.00028442	0.0061317
Cluster-34894.60739	3.35612	32.5963	-2.3211	0.00018867	0.0044079
Cluster-34894.48138	105.843	32.6337	1.572	2.0166e-05	0.00070913
Cluster-34894.83733	7.37596	32.6765	-1.791	0.00042083	0.0083828
Cluster-34894.28007	203.171	32.7246	2.461	3.7184e-13	1.3031e-10
Cluster-34894.71285	8.42113	32.727	-1.6904	0.00034895	0.0072123
Cluster-34894.78803	8.46645	32.7458	-1.685	0.00038318	0.0077864
Cluster-34894.13640	130.996	32.7597	1.9085	4.1641e-11	8.5842e-09
Cluster-34894.15653	113.227	32.8176	1.6812	1.8519e-07	1.3164e-05
Cluster-34894.78117	5.93362	32.8315	-1.954	0.00038243	0.0077763
Cluster-34894.24604	131.352	32.8378	1.8707	3.8378e-08	3.3702e-06
Cluster-34894.14910	106.102	32.8592	1.5858	3.2524e-06	0.00015197
Cluster-34894.54152	2.63353	32.8602	-2.7728	1.4435e-06	7.6864e-05
Cluster-34894.79162	110.514	32.8706	1.6217	6.1197e-06	0.00026007
Cluster-34894.105633	185.784	32.9069	2.3838	2.2334e-16	1.6661e-13
Cluster-34894.87626	6.02898	32.9132	-2.0224	8.5117e-05	0.0023105
Cluster-34894.44808	3.55218	32.9785	-2.585	1.4332e-06	7.64e-05
Cluster-34894.87355	7.50437	32.9899	-1.7821	0.00047615	0.0092335
Cluster-34894.101340	114.316	33.0366	1.7015	1.4884e-08	1.4913e-06
Cluster-34894.101479	221.041	33.0756	2.587	8.2249e-16	5.2078e-13
Cluster-34894.46004	5.86408	33.1033	-2.0671	6.7792e-05	0.0019145
Cluster-24547.1	105.196	33.1045	1.5877	1.0158e-07	7.8462e-06
Cluster-34894.25037	128.675	33.1259	1.86	1.7477e-09	2.251e-07
Cluster-34894.72923	5.30011	33.1537	-2.153	5.7035e-05	0.0016637
Cluster-34894.95614	161.698	33.1563	2.1013	2.4093e-08	2.2706e-06
Cluster-34894.15626	208.234	33.1649	2.5028	6.0726e-16	3.9857e-13
Cluster-34894.5591	8.72672	33.263	-1.6739	0.0003024	0.0064236
Cluster-34894.95734	162.109	33.3373	2.0515	6.0575e-07	3.6501e-05
Cluster-34894.19109	122.463	33.3651	1.6556	0.00017205	0.0040945
Cluster-34894.100723	5.7234	33.4947	-2.0254	0.00022883	0.0051399
Cluster-34894.108031	130.75	33.526	1.8633	2.6991e-09	3.2933e-07
Cluster-34894.105123	104.748	33.545	1.5404	4.639e-06	0.00020561
Cluster-34894.109948	8.14671	33.6215	-1.7645	0.0001882	0.004403
Cluster-34894.89707	118.607	33.6368	1.7185	7.0387e-08	5.6904e-06
Cluster-34894.58707	119.838	33.6694	1.745	6.2856e-09	6.9038e-07
Cluster-34894.30583	149.082	33.672	2.0104	9.0359e-10	1.2667e-07
Cluster-34894.25247	6.71758	33.7161	-1.9308	0.00015779	0.0038136
Cluster-34894.13361	107.864	33.7186	1.5487	2.4629e-05	0.00083952
Cluster-34894.43319	103.758	33.7903	1.5241	2.1346e-06	0.0001074
Cluster-34894.4170	5.12733	33.7915	-2.2691	6.3279e-06	0.00026786
Cluster-34894.33367	7.88738	33.8796	-1.8351	6.9644e-05	0.0019558
Cluster-34894.19495	105.744	33.8935	1.5383	7.2601e-06	0.00030098
Cluster-34894.90167	120.64	33.9626	1.6857	3.6032e-06	0.0001658
Cluster-34894.50493	7.80807	33.97	-1.7849	0.00036081	0.0074178
Cluster-34894.49943	8.8523	34.0695	-1.6875	0.00030486	0.0064642
Cluster-34894.55611	3.34007	34.0732	-2.329	0.00020746	0.0047507
Cluster-34894.67986	6.23387	34.0921	-2.0594	4.4051e-05	0.0013448
Cluster-34894.88864	3.75613	34.096	-2.4834	1.2887e-05	0.00048551
Cluster-34894.45237	5.68407	34.2194	-2.1647	2.5206e-05	0.0008555
Cluster-34894.52670	5.81781	34.2532	-2.1617	1.1656e-05	0.00044625
Cluster-34894.18447	148.683	34.2684	1.9093	2.5161e-06	0.00012267
Cluster-34894.78290	127.529	34.3389	1.7933	1.2641e-08	1.2994e-06
Cluster-34894.57971	0.705592	34.3448	-3.4355	8.8415e-08	6.9322e-06
Cluster-34894.28684	9.7379	34.4345	-1.606	0.00029527	0.0063075
Cluster-34894.52967	6.9769	34.4559	-1.9266	0.00011629	0.0029763
Cluster-34894.72436	7.74576	34.4596	-1.8466	0.00011827	0.0030172
Cluster-34894.68149	7.11853	34.4847	-1.9621	3.0787e-05	0.0010029
Cluster-34894.79601	8.01924	34.5026	-1.7695	0.00040412	0.0081101
Cluster-34894.50624	6.1234	34.5589	-2.0947	2.8058e-05	0.00093043
Cluster-34894.88343	115.618	34.5993	1.6613	1.5391e-08	1.5367e-06
Cluster-34894.107067	8.35693	34.6082	-1.7822	0.00010256	0.0026892
Cluster-34894.18073	462.343	34.6798	3.5779	4.5485e-37	4.0319e-33
Cluster-34894.104730	109.111	34.7516	1.5661	1.5825e-07	1.1582e-05
Cluster-34894.41952	8.54482	34.7855	-1.7635	0.00015018	0.0036704
Cluster-34894.65259	9.07763	34.7906	-1.6848	0.00026852	0.0058466
Cluster-13652.0	6.47714	34.8156	-1.993	0.00013937	0.0034578
Cluster-34894.84925	8.4353	34.8333	-1.7575	0.00023961	0.005329
Cluster-34894.103403	7.82412	34.8672	-1.8419	0.00014525	0.0035745
Cluster-34894.71837	148.817	34.8952	1.9377	7.3675e-08	5.9276e-06
Cluster-34894.90858	9.65859	34.9515	-1.6126	0.0004409	0.0087067
Cluster-34894.68261	7.53553	34.973	-1.9021	7.511e-05	0.0020829
Cluster-34894.72138	116.708	34.9743	1.65	8.0318e-08	6.3904e-06
Cluster-34894.16824	107.009	34.9869	1.5184	1.7425e-06	9.042e-05
Cluster-34894.17396	121.838	34.9982	1.7133	1.3385e-08	1.3611e-06
Cluster-34894.34740	120.306	35.0121	1.6459	9.7667e-06	0.00038468
Cluster-34894.73062	8.4825	35.0271	-1.7443	0.00033511	0.006983
Cluster-34894.88000	7.51948	35.1882	-1.9372	2.98e-05	0.00097497
Cluster-34894.88535	8.60714	35.2221	-1.7308	0.00045995	0.0089892
Cluster-34894.7647	146.463	35.2625	1.8693	3.0878e-06	0.00014555
Cluster-34894.21450	7.11853	35.3204	-1.9791	3.6563e-05	0.0011553
Cluster-34894.50009	8.22507	35.3544	-1.8133	0.00014313	0.0035322
Cluster-34894.11473	7.45433	35.4472	-1.8523	0.00039862	0.0080145
Cluster-34894.100920	9.86253	35.4612	-1.6147	0.00046888	0.0091195
Cluster-34894.53632	2.26658	35.5079	-2.9984	1.896e-07	1.3428e-05
Cluster-34894.19544	119.845	35.5155	1.6543	3.5168e-07	2.2814e-05
Cluster-34894.71018	9.65859	35.5179	-1.6359	0.00037727	0.0076985
Cluster-34894.41601	142.647	35.5469	1.8005	1.3056e-05	0.000491
Cluster-34894.23171	184.566	35.5934	2.2308	3.4757e-12	9.4713e-10
Cluster-34894.52779	9.14183	35.6234	-1.6988	0.00029603	0.0063169
Cluster-34894.89287	8.4674	35.6966	-1.8209	5.5077e-05	0.0016179
Cluster-34894.10023	9.49463	35.7568	-1.6678	0.00029579	0.0063144
Cluster-34894.17806	120.434	35.7871	1.6607	3.9332e-08	3.444e-06
Cluster-34894.101653	148.9	35.7947	1.9455	1.6055e-10	2.7809e-08
Cluster-34894.61538	8.75693	35.8236	-1.7795	8.721e-05	0.0023609
Cluster-34894.48346	284.263	35.9671	2.6202	4.6185e-09	5.2726e-07
Cluster-34894.72340	109.613	35.986	1.5269	3.8731e-07	2.4752e-05
Cluster-34894.24596	3.18334	36.0689	-2.5891	1.3036e-05	0.0004905
Cluster-34894.2329	9.38511	36.1093	-1.7102	0.00011906	0.0030333
Cluster-34894.56383	4.3673	36.1153	-2.3249	6.5813e-05	0.0018674
Cluster-24315.0	115.373	36.1972	1.5713	2.2543e-06	0.00011237
Cluster-34894.95617	122.049	36.2201	1.6238	8.6713e-06	0.00034995
Cluster-34894.106816	6.8762	36.2288	-2.0859	6.8334e-06	0.00028604
Cluster-34894.24533	135.215	36.2402	1.8078	7.0122e-10	1.0161e-07
Cluster-34894.31588	121.282	36.2578	1.6456	1.4777e-07	1.0926e-05
Cluster-17519.0	133.441	36.2652	1.7609	3.2299e-07	2.1221e-05
Cluster-30221.0	6.05386	36.3774	-2.0586	0.0002261	0.0050937
Cluster-34894.21761	445.176	36.3775	3.1723	1.9385e-12	5.6614e-10
Cluster-34894.52875	4.74337	36.386	-2.3738	7.9207e-06	0.00032408
Cluster-34894.52218	9.80022	36.3987	-1.6795	0.00012208	0.0030955
Cluster-34894.17406	143.456	36.4138	1.8771	1.6956e-09	2.1914e-07
Cluster-34894.66229	133.02	36.4138	1.7794	8.8201e-10	1.2412e-07
Cluster-34894.10975	116.368	36.5233	1.5682	3.6291e-06	0.0001669
Cluster-34894.68698	8.13065	36.5435	-1.8511	0.00014385	0.0035477
Cluster-34894.32274	137.36	36.5976	1.7888	1.1174e-07	8.5521e-06
Cluster-34894.92759	577.429	36.6392	2.9287	1.2242e-06	6.6817e-05
Cluster-34894.77939	137.94	36.6654	1.7885	7.7471e-08	6.1933e-06
Cluster-34894.71966	2.28168	36.6793	-3.1928	2.6081e-09	3.2006e-07
Cluster-34894.49674	161.212	36.7258	1.9951	8.6988e-09	9.2705e-07
Cluster-34894.100353	119.965	36.7386	1.5907	3.9151e-06	0.00017792
Cluster-34894.101013	225.92	36.8	2.4491	1.2765e-12	3.9097e-10
Cluster-34894.17434	142.68	36.9058	1.855	4.4553e-10	6.8092e-08
Cluster-34894.30737	131.842	36.9436	1.7306	4.0907e-08	3.5612e-06
Cluster-34894.29377	6.96968	36.9776	-2.0797	1.2982e-05	0.0004886
Cluster-34894.74521	5.97455	36.985	-2.2674	2.0905e-06	0.00010547
Cluster-34894.71458	8.12971	36.99	-1.8758	9.4304e-05	0.002513
Cluster-34894.24583	149.293	37.0303	1.9196	9.0929e-11	1.6792e-08
Cluster-34894.32064	113.902	37.0343	1.5155	7.0247e-06	0.00029291
Cluster-34894.43385	10.3258	37.0831	-1.6214	0.00040656	0.0081482
Cluster-16853.1	112.228	37.1247	1.5214	2.354e-07	1.6213e-05
Cluster-34894.64341	8.26157	37.1738	-1.8405	0.00015143	0.0036939
Cluster-34894.60012	1.31677	37.2067	-3.3128	6.7661e-08	5.4966e-06
Cluster-34894.70090	10.75	37.2077	-1.5868	0.00030344	0.0064413
Cluster-34894.48898	185.79	37.2417	2.2154	1.5806e-14	7.5855e-12
Cluster-34894.29020	118.985	37.3839	1.5953	3.6007e-08	3.1899e-06
Cluster-34894.34421	9.46442	37.4014	-1.7146	0.000284	0.0061262
Cluster-34894.15195	7.48738	37.4103	-1.9915	3.4462e-05	0.0010983
Cluster-34894.18991	10.9914	37.4744	-1.5584	0.00045888	0.0089725
Cluster-34894.82976	113.788	37.5011	1.5055	3.9789e-06	0.00018033
Cluster-34894.44562	8.52971	37.5111	-1.8682	4.5604e-05	0.0013819
Cluster-34894.60356	9.64348	37.5174	-1.71	0.00016116	0.0038776
Cluster-34894.55056	166.338	37.5389	1.9713	2.3107e-07	1.5988e-05
Cluster-34894.39141	113.378	37.5425	1.5182	4.8696e-07	3.0211e-05
Cluster-34894.84548	198.365	37.6404	2.2395	7.5871e-11	1.4418e-08
Cluster-34894.45123	6.03087	37.6508	-2.0193	0.00049431	0.0095232
Cluster-34894.15666	218.378	37.6658	2.4109	2.7876e-16	2.0196e-13
Cluster-34894.97672	8.2855	37.6822	-1.8243	0.00038835	0.0078596
Cluster-34894.40228	7.68533	37.6897	-1.89	0.00028172	0.0060919
Cluster-34894.18156	27505.7	37.7308	3.0797	8.6208e-06	0.00034847
Cluster-34894.30727	8.43624	37.8094	-1.8755	5.8905e-05	0.0017054
Cluster-34894.90032	6.53757	37.8507	-2.0771	7.9527e-05	0.0021865
Cluster-34894.29907	172.274	37.8584	2.0822	1.0952e-12	3.4171e-10
Cluster-31865.0	11.2337	37.8633	-1.5429	0.00045567	0.0089223
Cluster-34894.45336	114.349	37.8973	1.5151	2.836e-07	1.9028e-05
Cluster-34894.34630	5.6057	37.9212	-2.3802	5.0898e-07	3.1374e-05
Cluster-34894.22276	197.314	37.944	2.2699	2.9149e-15	1.6452e-12
Cluster-34894.94494	9.10879	37.964	-1.8004	7.9241e-05	0.0021795
Cluster-34894.19990	114.465	38.003	1.5035	3.016e-06	0.00014279
Cluster-34894.63470	10.9763	38.2358	-1.6004	0.0001934	0.0044907
Cluster-34894.101009	120.707	38.2659	1.5572	4.0173e-06	0.00018199
Cluster-34894.84835	7.74576	38.3113	-2.012	1.0191e-05	0.00039868
Cluster-34894.10964	794.281	38.3275	3.2452	5.711e-08	4.7498e-06
Cluster-34894.82854	8.73994	38.3327	-1.844	8.3896e-05	0.0022821
Cluster-34894.54893	224.664	38.3779	2.3846	1.2628e-12	3.8757e-10
Cluster-34894.18176	8.0825	38.3867	-1.9364	3.9364e-05	0.0012274
Cluster-34894.86735	138.371	38.4371	1.768	4.0377e-10	6.2599e-08
Cluster-34894.54655	133.085	38.5479	1.6813	4.6925e-07	2.9293e-05
Cluster-34894.7376	125.594	38.5501	1.5493	0.00011981	0.0030466
Cluster-34894.11037	10.2012	38.5554	-1.6668	0.00035456	0.0073103
Cluster-34894.79481	143.03	38.6197	1.7601	4.8079e-07	2.9902e-05
Cluster-34894.77888	7.11947	38.6547	-2.0623	2.9014e-05	0.00095443
Cluster-34894.13896	124.067	38.6674	1.5985	1.7392e-07	1.2504e-05
Cluster-34894.36276	2.39121	38.7054	-2.7734	9.5975e-06	0.00037861
Cluster-34894.7700	128.193	38.7291	1.642	2.6257e-08	2.4531e-06
Cluster-34894.55065	7.34575	38.7367	-2.0472	1.9278e-05	0.00068307
Cluster-34894.68198	10.2386	38.7793	-1.6636	0.00031079	0.0065631
Cluster-34894.27127	181.775	38.8248	2.0537	1.9346e-08	1.8845e-06
Cluster-34894.97671	180.96	38.826	2.1151	2.0509e-12	5.955e-10
Cluster-34894.53354	117.114	38.8625	1.5155	2.3886e-07	1.6376e-05
Cluster-34894.90878	1.62235	38.8788	-3.4986	3.7614e-10	5.8496e-08
Cluster-34894.56484	9.14183	38.9302	-1.8157	9.3923e-05	0.002506
Cluster-34894.24264	132.998	38.9402	1.6429	6.7614e-06	0.00028337
Cluster-34894.22354	8.72578	39.0083	-1.8927	2.7358e-05	0.00091351
Cluster-27541.0	9.7209	39.0134	-1.7614	7.8718e-05	0.0021686
Cluster-34894.50810	159.742	39.0601	1.919	2.1866e-09	2.7458e-07
Cluster-34894.47289	119.518	39.128	1.5244	1.8312e-06	9.4179e-05
Cluster-34894.53603	12.1131	39.162	-1.5101	0.00049943	0.0095935
Cluster-12739.0	8.66157	39.314	-1.8311	0.00025425	0.0055836
Cluster-34894.77674	127.52	39.3342	1.6194	4.979e-08	4.2221e-06
Cluster-34894.29924	8.8523	39.441	-1.8132	0.0003172	0.0066761
Cluster-34894.88865	5.40176	39.5207	-2.331	1.1099e-05	0.00042807
Cluster-34894.110354	5.34732	39.5781	-2.3007	3.1474e-05	0.0010204
Cluster-34894.101644	155.377	39.6048	1.8048	2.3901e-06	0.00011767
Cluster-34894.12093	131.108	39.6463	1.6186	6.9293e-07	4.0917e-05
Cluster-34894.86646	6.93852	39.6715	-2.1934	2.2826e-06	0.00011345
Cluster-34894.16662	136.963	39.6866	1.7121	9.6794e-10	1.3424e-07
Cluster-34894.47770	4.50105	39.6894	-2.4984	4.9349e-06	0.00021669
Cluster-34894.52780	8.54577	39.7016	-1.9356	2.6066e-05	0.00087926
Cluster-34894.73276	123.334	39.7031	1.5072	3.9304e-05	0.0012265
Cluster-34894.61859	124.087	39.7231	1.5676	8.7492e-08	6.8848e-06
Cluster-34894.32442	8.56715	39.7559	-1.8677	0.00015443	0.0037497
Cluster-34894.41080	11.4377	39.7847	-1.602	0.00020326	0.0046721
Cluster-34894.99149	127.665	39.8351	1.5841	1.4562e-06	7.7343e-05
Cluster-34894.100382	153.26	39.8639	1.7837	2.0345e-06	0.00010302
Cluster-34894.82711	188.82	39.8741	2.1587	2.0045e-16	1.5179e-13
Cluster-34894.81721	123.885	39.8954	1.5618	8.786e-08	6.903e-06
Cluster-34894.34704	254.723	39.9192	2.4981	5.1186e-13	1.7412e-10
Cluster-34894.52985	134.102	39.9472	1.6054	1.7925e-05	0.00064184
Cluster-34894.54050	8.86646	39.9623	-1.8786	7.177e-05	0.0020058
Cluster-34894.84881	150.18	40.0742	1.8272	5.9336e-11	1.1643e-08
Cluster-34894.70309	128.648	40.1283	1.6056	2.924e-08	2.6819e-06
Cluster-34894.30879	12.0186	40.1786	-1.5597	0.00019593	0.004543
Cluster-34894.52457	165.51	40.2553	1.9465	1.1518e-11	2.7163e-09
Cluster-34894.13132	140.991	40.2616	1.6997	3.7217e-07	2.3937e-05
Cluster-34894.10042	12.3252	40.2855	-1.5338	0.00022595	0.0050911
Cluster-34894.77831	7.80807	40.356	-2.0783	4.1479e-06	0.00018681
Cluster-34894.6051	124.752	40.4566	1.5478	1.9119e-07	1.3527e-05
Cluster-34894.83517	4.80664	40.4806	-2.5863	1.4851e-07	1.0976e-05
Cluster-34894.73623	7.14969	40.4981	-2.1509	6.1771e-06	0.00026199
Cluster-25183.0	7.84017	40.5018	-2.0297	2.4853e-05	0.00084541
Cluster-34894.84288	10.9933	40.5171	-1.6532	0.00023245	0.0052031
Cluster-34894.15710	177.538	40.6658	1.9848	1.1224e-08	1.1641e-06
Cluster-34894.78961	136.328	40.7147	1.6552	6.0018e-08	4.9558e-06
Cluster-34894.78656	124.158	40.7311	1.5204	1.548e-06	8.1452e-05
Cluster-34894.28142	153.611	40.7523	1.6701	0.0003227	0.0067721
Cluster-34894.55195	8.26346	40.7561	-1.9734	3.0864e-05	0.0010041
Cluster-34894.93481	6.85921	40.7714	-2.2104	3.6628e-06	0.00016828
Cluster-34894.83267	125.421	40.7865	1.5063	1.5224e-05	0.00056051
Cluster-34894.56663	5.65291	40.7902	-2.387	2.8935e-06	0.00013747
Cluster-34894.109950	9.71368	40.7938	-1.7769	0.00027573	0.0059799
Cluster-34894.72590	10.333	40.8267	-1.7544	5.7337e-05	0.0016686
Cluster-34894.67139	6.82805	40.852	-2.1707	1.4348e-05	0.0005319
Cluster-34894.72148	139.349	40.8681	1.6774	2.2783e-08	2.1661e-06
Cluster-34894.92843	204.841	40.8858	2.2283	1.8223e-16	1.3869e-13
Cluster-34894.36201	12.5524	40.8971	-1.5075	0.00050984	0.0097587
Cluster-34894.103404	10.4756	40.9008	-1.7128	0.00020069	0.0046277
Cluster-34894.67961	253.808	40.9485	2.4537	3.5762e-12	9.6753e-10
Cluster-34894.38295	11.8396	40.9511	-1.6022	0.00018034	0.0042537
Cluster-34894.22400	11.2114	41.0555	-1.6639	0.00015095	0.0036838
Cluster-34894.23798	11.8547	41.0669	-1.6072	0.00015638	0.0037895
Cluster-34894.8510	10.1681	41.0744	-1.7521	0.00017937	0.0042366
Cluster-34894.15624	237.703	41.0846	2.3606	3.9855e-12	1.0611e-09
Cluster-34894.56542	10.4586	41.0871	-1.7676	3.1099e-05	0.0010102
Cluster-34894.29190	10.4577	41.0946	-1.7501	6.8642e-05	0.0019333
Cluster-34894.72988	10.4256	41.1501	-1.7165	0.00026236	0.0057365
Cluster-34894.100505	140.014	41.1526	1.6764	3.7363e-08	3.2945e-06
Cluster-34894.38172	11.9242	41.1701	-1.5928	0.00016775	0.0040132
Cluster-29404.0	7.1969	41.1966	-2.2103	9.228e-07	5.2259e-05
Cluster-34894.37812	129.119	41.228	1.5709	5.9208e-08	4.8943e-06
Cluster-28677.0	124.361	41.2582	1.5226	8.7716e-08	6.8989e-06
Cluster-34894.97957	127.29	41.3261	1.5333	5.8906e-07	3.565e-05
Cluster-34894.38069	127.261	41.3402	1.5027	3.2236e-05	0.0010409
Cluster-34894.103235	135.625	41.364	1.633	1.8845e-08	1.8405e-06
Cluster-34894.78701	349.014	41.3767	2.7004	2.2571e-09	2.8226e-07
Cluster-32564.2	4.96242	41.3993	-2.5737	2.9537e-07	1.9682e-05
Cluster-34894.31170	8.19297	41.4154	-2.0538	5.4408e-06	0.0002354
Cluster-34894.97469	158.521	41.4195	1.8171	5.3619e-08	4.4939e-06
Cluster-34894.77073	7.88644	41.4457	-2.0493	2.5171e-05	0.00085449
Cluster-34894.88024	127.17	41.4495	1.5446	5.8334e-08	4.8353e-06
Cluster-34894.33066	6.35756	41.4609	-2.2445	1.5506e-05	0.00056909
Cluster-34894.85824	126.649	41.5225	1.5091	8.6952e-06	0.00035054
Cluster-34894.41038	5.84803	41.6395	-2.4231	4.6074e-07	2.8845e-05
Cluster-34894.14562	345.846	41.6786	2.2303	0.00025911	0.0056762
Cluster-34894.68615	8.99926	41.7024	-1.9188	3.1119e-05	0.0010107
Cluster-34894.92990	9.58022	41.7276	-1.8603	3.0131e-05	0.00098407
Cluster-34894.16594	189.188	41.7627	2.0861	2.0013e-13	7.5019e-11
Cluster-34894.97956	279.33	41.8106	2.648	1.4749e-25	4.729e-22
Cluster-34894.75435	151.315	41.8194	1.7694	3.1396e-09	3.743e-07
Cluster-34894.57814	10.7953	41.8231	-1.6833	0.00039487	0.0079612
Cluster-34894.37236	129.156	41.8409	1.5151	1.8357e-05	0.0006552
Cluster-34894.33421	154.747	41.851	1.7939	3.0536e-09	3.655e-07
Cluster-34894.26738	128.501	41.8887	1.5449	1.3003e-07	9.744e-06
Cluster-34894.62838	5.46313	41.8887	-2.4653	7.7998e-07	4.5121e-05
Cluster-34894.96929	8.46645	41.9049	-1.9957	2.0065e-05	0.00070629
Cluster-34894.63014	9.47952	41.9627	-1.8322	0.00017812	0.0042124
Cluster-34894.83345	8.72578	42.0572	-2.0072	3.9651e-06	0.00017981
Cluster-34894.67962	384.488	42.0762	3.0403	1.8272e-24	4.7475e-21
Cluster-34894.99686	279.024	42.1064	2.5353	3.4116e-13	1.2046e-10
Cluster-34894.91360	10.5049	42.1705	-1.7877	3.5885e-05	0.001137
Cluster-14170.0	7.40807	42.2107	-2.1275	1.558e-05	0.00057139
Cluster-34894.14125	289.983	42.2242	2.5347	1.2131e-10	2.1685e-08
Cluster-34894.47768	173.301	42.2448	1.9302	2.185e-10	3.6105e-08
Cluster-34894.74994	9.17299	42.29	-1.9604	6.8039e-06	0.00028496
Cluster-34894.77448	11.4216	42.3025	-1.6744	0.00014045	0.0034793
Cluster-34894.101634	165.347	42.3164	1.8828	1.6802e-11	3.8017e-09
Cluster-34894.97959	215.819	42.4297	2.2622	8.1555e-19	9.9112e-16
Cluster-34894.76226	152.261	42.4748	1.6681	4.6266e-05	0.0013969
Cluster-34894.17294	387.832	42.4877	2.859	1.2058e-11	2.8393e-09
Cluster-34894.37205	188.136	42.5493	2.0413	4.551e-12	1.1886e-09
Cluster-34894.102211	6.49319	42.5641	-2.219	2.6509e-05	0.00089032
Cluster-34894.81065	12.678	42.6285	-1.5755	0.00013928	0.0034561
Cluster-34894.99970	204.488	42.6336	2.1236	5.168e-11	1.0247e-08
Cluster-34894.69132	10.953	42.7456	-1.7448	7.8421e-05	0.002162
Cluster-34894.84154	186.283	42.7607	2.0227	1.4407e-11	3.3349e-09
Cluster-34894.88569	8.13065	42.7819	-2.1048	2.6344e-06	0.00012712
Cluster-34894.81525	127.632	42.8058	1.5042	1.9823e-07	1.3972e-05
Cluster-34894.88450	137.317	42.8412	1.5933	1.6985e-07	1.2282e-05
Cluster-18868.0	11.4386	42.8563	-1.6654	0.00031491	0.006637
Cluster-34894.41602	133.988	42.9067	1.5303	1.1671e-05	0.00044656
Cluster-34894.65520	0.658383	42.9645	-3.22	1.5349e-06	8.0868e-05
Cluster-34894.21050	10.0435	42.9695	-1.8718	9.7998e-06	0.00038587
Cluster-34894.26612	2.89286	43.0111	-3.057	2.8729e-08	2.6398e-06
Cluster-34894.26268	137.631	43.0827	1.5965	1.1412e-07	8.7031e-06
Cluster-34894.83425	240.132	43.0878	2.3746	7.8295e-18	7.8657e-15
Cluster-34894.43346	7.59596	43.132	-2.1235	1.9725e-05	0.00069579
Cluster-34894.76752	143.565	43.1922	1.6602	2.7905e-09	3.3739e-07
Cluster-13705.2	132.883	43.1934	1.551	3.9513e-08	3.4558e-06
Cluster-34894.29668	163.538	43.1934	1.8419	1.6546e-11	3.7607e-09
Cluster-34894.97991	160.536	43.2324	1.8171	5.8435e-11	1.1481e-08
Cluster-34894.77879	9.84932	43.2387	-1.86	6.1344e-05	0.0017625
Cluster-34894.46253	4.91427	43.2717	-2.4931	6.2871e-06	0.00026635
Cluster-34894.65787	11.8405	43.2878	-1.6561	0.0001924	0.0044715
Cluster-34894.66257	2.68169	43.3092	-3.2817	2.919e-10	4.6845e-08
Cluster-34894.6506	149.168	43.3206	1.6769	2.0125e-07	1.4165e-05
Cluster-34894.17976	154.577	43.3496	1.7505	2.2817e-09	2.844e-07
Cluster-34894.23214	12.9515	43.3519	-1.5663	0.00014742	0.0036188
Cluster-34894.87748	5.28406	43.3531	-2.531	6.8471e-07	4.0511e-05
Cluster-34894.48340	203.368	43.356	2.0869	1.023e-09	1.4053e-07
Cluster-34894.83751	140.951	43.3582	1.628	8.0545e-09	8.6389e-07
Cluster-34894.29280	163.739	43.4263	1.8286	5.835e-10	8.6291e-08
Cluster-34894.8282	223.374	43.4314	2.2457	4.7516e-14	2.0458e-11
Cluster-34894.70842	453.736	43.5057	3.0338	4.8884e-13	1.6742e-10
Cluster-34894.102716	13.4128	43.5193	-1.5199	0.00035696	0.0073495
Cluster-21357.0	12.9826	43.5194	-1.5554	0.00031018	0.006553
Cluster-34894.70226	141.426	43.5432	1.6128	2.8616e-07	1.9174e-05
Cluster-34894.31267	131.862	43.5483	1.5333	2.1095e-08	2.0274e-06
Cluster-34894.81972	178.055	43.5509	1.9503	1.7338e-12	5.1231e-10
Cluster-34894.76654	12.7252	43.5684	-1.6011	0.00010099	0.0026591
Cluster-34894.100752	158.823	43.5884	1.7386	8.5117e-07	4.8755e-05
Cluster-34894.24887	135.088	43.5899	1.5391	1.3772e-06	7.3988e-05
Cluster-34894.53973	4.93127	43.6114	-2.6082	4.0984e-07	2.6049e-05
Cluster-34894.35401	13.4317	43.6149	-1.514	0.00048712	0.0094111
Cluster-34894.60353	194.324	43.761	2.0661	3.0786e-14	1.3605e-11
Cluster-34894.60169	11.0556	43.8188	-1.7632	5.2993e-05	0.0015661
Cluster-34894.104612	137.684	43.99	1.5763	2.2666e-08	2.1577e-06
Cluster-34894.75474	7.71365	44.0667	-2.0617	8.2905e-05	0.0022612
Cluster-34894.51663	11.5724	44.097	-1.6861	0.00021695	0.0049267
Cluster-34894.95778	3.5975	44.1185	-2.3941	0.00020655	0.0047334
Cluster-34894.108307	11.7452	44.1813	-1.6767	0.00020217	0.0046521
Cluster-34894.49352	9.15883	44.1965	-1.9036	0.00018317	0.0043102
Cluster-34894.70840	379.899	44.2003	2.735	9.0476e-10	1.2671e-07
Cluster-34894.90212	12.9203	44.2101	-1.5608	0.00050335	0.0096538
Cluster-34894.18380	12.7724	44.2453	-1.6188	8.2287e-05	0.0022472
Cluster-34894.31774	162.489	44.2517	1.7815	1.8211e-09	2.3356e-07
Cluster-34894.97457	10.9068	44.3271	-1.7912	5.3146e-05	0.00157
Cluster-34894.56122	10649.4	44.3962	7.2034	2.892e-76	1.4527e-71
Cluster-34894.77895	11.7763	44.4253	-1.7275	2.9077e-05	0.00095631
Cluster-34894.100628	9.40809	44.4316	-1.9503	3.5114e-05	0.0011161
Cluster-34894.85261	149.826	44.7023	1.6312	1.2879e-06	6.9837e-05
Cluster-34894.102338	142.592	44.7512	1.595	9.3515e-08	7.2866e-06
Cluster-34894.41687	186.838	44.7624	1.9472	4.7919e-10	7.2794e-08
Cluster-34894.61214	4.43779	44.7926	-2.7427	9.3516e-08	7.2866e-06
Cluster-34894.76947	13.8289	44.9451	-1.5284	0.00029019	0.0062222
Cluster-34894.64781	140.582	44.9476	1.5634	1.784e-07	1.2777e-05
Cluster-34894.46510	143.071	44.9615	1.5593	8.4886e-06	0.00034426
Cluster-34894.78052	5.91318	44.9765	-2.4643	8.6335e-07	4.9356e-05
Cluster-34894.85451	9.55694	44.9777	-1.9908	4.421e-06	0.00019693
Cluster-34894.91765	10.5049	44.9804	-1.8514	3.3941e-05	0.0010855
Cluster-34894.40442	8.73994	44.9967	-2.0545	8.7987e-06	0.00035358
Cluster-34894.37362	10.3944	45.0281	-1.8552	3.709e-05	0.0011688
Cluster-34894.37600	13.8298	45.0481	-1.5385	0.00021164	0.004827
Cluster-34894.78905	146.817	45.1062	1.5979	1.6365e-06	8.5599e-05
Cluster-34894.94525	8.05134	45.116	-2.1471	4.1374e-06	0.00018651
Cluster-34894.102271	137.356	45.1174	1.5302	1.1565e-07	8.7972e-06
Cluster-34894.86975	7.61295	45.1676	-2.2424	1.1725e-06	6.4272e-05
Cluster-34894.53094	9.54184	45.2231	-2.0089	2.4585e-06	0.00012048
Cluster-34894.11711	139.61	45.339	1.5027	3.6339e-05	0.0011499
Cluster-34894.64275	9.41721	45.3589	-1.9932	9.0201e-06	0.00035997
Cluster-34894.72788	251.45	45.383	2.367	7.6285e-18	7.7673e-15
Cluster-34894.42568	9.58621	45.5151	-1.854	0.00041616	0.0083062
Cluster-34894.71970	13.9655	45.5414	-1.5214	0.00038091	0.0077568
Cluster-34894.14080	138.168	45.5567	1.5164	1.4279e-06	7.6194e-05
Cluster-34894.67620	137.676	45.6359	1.5028	3.473e-06	0.00016039
Cluster-34894.82199	11.7584	45.6837	-1.737	7.0757e-05	0.0019823
Cluster-34894.74942	9.41626	45.7149	-1.9817	1.8522e-05	0.00065968
Cluster-34894.84281	9.31995	45.768	-1.9913	1.6177e-05	0.00058914
Cluster-34894.95714	14.1738	45.7718	-1.5241	0.00017724	0.0041963
Cluster-34894.36188	150.168	45.7781	1.6231	7.3405e-08	5.9153e-06
Cluster-34894.27174	165.226	45.8234	1.7747	1.8676e-10	3.1621e-08
Cluster-34894.37069	178.951	45.8548	1.8495	5.1172e-09	5.7676e-07
Cluster-34894.105318	144.07	45.8624	1.5523	3.4557e-06	0.00015979
Cluster-34894.74809	12.6317	46.0398	-1.6661	8.1609e-05	0.0022336
Cluster-34894.78440	153.619	46.0399	1.5929	2.5795e-05	0.00087215
Cluster-34894.20696	191.923	46.0486	1.9591	3.0109e-11	6.4634e-09
Cluster-28245.4	11.8147	46.1781	-1.7133	0.00015639	0.0037895
Cluster-34894.44500	10.007	46.2888	-1.8271	0.00049682	0.0095591
Cluster-34894.87363	4.59452	46.2978	-2.8297	6.3714e-09	6.9828e-07
Cluster-34894.101123	189.879	46.3304	1.9547	5.9013e-13	1.9718e-10
Cluster-34894.67845	13.7515	46.4221	-1.5681	0.00025563	0.0056078
Cluster-34894.13697	12.0819	46.4348	-1.7006	0.00017724	0.0041963
Cluster-34894.98040	199.697	46.475	2.0036	2.2261e-11	4.8972e-09
Cluster-34894.34488	8.14671	46.479	-2.2186	4.8922e-07	3.0326e-05
Cluster-34894.84745	225.46	46.5192	2.1838	4.3071e-15	2.337e-12
Cluster-34894.48494	10.7179	46.5243	-1.8387	8.3752e-05	0.0022794
Cluster-34894.81578	193.222	46.5543	1.9558	8.2318e-11	1.5448e-08
Cluster-34894.46747	12.2449	46.5832	-1.7071	8.8835e-05	0.0023965
Cluster-34894.53357	10.7481	46.6246	-1.8342	9.0177e-05	0.0024279
Cluster-34894.50264	8.34277	46.6424	-2.1713	1.3845e-06	7.4272e-05
Cluster-34894.74516	12.2858	46.6765	-1.699	0.00016015	0.0038584
Cluster-34894.63858	9.29762	46.7066	-2.0454	7.7233e-06	0.00031738
Cluster-34894.37325	141.924	46.7784	1.5338	6.8899e-08	5.5821e-06
Cluster-34894.36692	5.86502	46.8918	-2.4559	3.1494e-06	0.00014803
Cluster-34894.50907	187.984	46.9156	1.911	1.3606e-11	3.1739e-09
Cluster-34894.1876	10.4284	46.9619	-1.8814	5.4993e-05	0.0016158
Cluster-34894.16176	13.6127	46.9621	-1.5933	0.00019109	0.0044486
Cluster-34894.84052	8.34277	47.0314	-2.166	2.5562e-06	0.00012414
Cluster-16153.0	12.0124	47.1155	-1.7524	7.6643e-05	0.0021215
Cluster-34894.40049	13.4317	47.1469	-1.6278	0.00010403	0.0027212
Cluster-34894.52311	153.048	47.1483	1.617	8.3567e-08	6.6106e-06
Cluster-34894.95951	148.652	47.1585	1.5603	9.8878e-07	5.5536e-05
Cluster-34894.107577	141.596	47.2377	1.5071	6.3324e-07	3.7867e-05
Cluster-34894.56533	12.8589	47.2439	-1.659	0.00015707	0.0038012
Cluster-34894.44147	4.21057	47.3004	-2.9327	2.8684e-09	3.4525e-07
Cluster-34894.106352	163.663	47.3433	1.7152	4.5213e-10	6.896e-08
Cluster-34894.70052	1.60725	47.511	-3.5385	1.8643e-09	2.3808e-07
Cluster-34894.88627	209.87	47.5486	1.9796	4.5925e-08	3.9344e-06
Cluster-34894.8479	8.64836	47.6579	-2.1379	3.0053e-06	0.00014237
Cluster-34894.31116	13.7105	47.6756	-1.5748	0.00046777	0.0091101
Cluster-34894.48260	3.45682	47.6942	-3.0394	1.0288e-08	1.0773e-06
Cluster-34894.55304	146.939	47.7071	1.5428	3.9711e-07	2.5314e-05
Cluster-34894.71829	244.766	47.775	2.2605	5.4255e-17	4.5675e-14
Cluster-34894.71967	4.65684	47.819	-2.8851	1.6728e-09	2.1656e-07
Cluster-34894.47215	13.455	47.8568	-1.6027	0.00036404	0.007476
Cluster-34894.100972	221.832	47.9059	2.1254	2.6137e-15	1.4807e-12
Cluster-34894.73824	152.014	47.9195	1.5803	3.8993e-07	2.4909e-05
Cluster-34894.12230	155.011	47.9511	1.6155	8.873e-09	9.4429e-07
Cluster-34894.25586	11.2728	48.0731	-1.8421	4.7345e-05	0.0014227
Cluster-34894.42178	181.447	48.0909	1.8125	7.328e-09	7.916e-07
Cluster-34894.984	247.826	48.0909	2.2572	5.0479e-15	2.6975e-12
Cluster-34894.89565	14.8152	48.0945	-1.5182	0.0003095	0.0065444
Cluster-34894.49819	158.314	48.0985	1.5687	7.0874e-05	0.001985
Cluster-19093.0	160.096	48.1361	1.6703	1.4256e-10	2.4923e-08
Cluster-34894.7594	13.7534	48.1989	-1.6172	0.0001666	0.0039889
Cluster-34894.71839	243.627	48.2004	2.1756	4.5153e-10	6.8939e-08
Cluster-34894.109137	11.0172	48.2191	-1.8684	4.9539e-05	0.0014786
Cluster-34894.86699	6.94041	48.2858	-2.4005	6.3234e-07	3.7829e-05
Cluster-34894.41967	15.0131	48.2958	-1.5017	0.00039563	0.0079736
Cluster-34894.81760	12.4989	48.3877	-1.7093	0.00021083	0.0048122
Cluster-34894.63805	9.0172	48.6091	-2.0015	0.00013265	0.0033173
Cluster-34894.39059	8.51366	48.6253	-2.1453	1.0085e-05	0.0003957
Cluster-34894.103048	12.9836	48.6318	-1.7269	1.6303e-05	0.00059313
Cluster-34894.89738	13.691	48.6822	-1.6375	0.00011865	0.0030248
Cluster-34894.17060	238.449	48.7059	2.201	2.666e-16	1.9409e-13
Cluster-34894.52725	198.352	48.7701	1.843	3.1624e-06	0.0001486
Cluster-34894.23733	6.68831	48.9213	-2.3419	9.2988e-06	0.00036954
Cluster-34894.65860	11.7121	48.9275	-1.8306	2.8842e-05	0.00095044
Cluster-34894.77698	14.0429	48.9805	-1.6102	0.00018046	0.0042557
Cluster-34894.35164	10.317	48.9904	-2.0115	1.353e-06	7.2947e-05
Cluster-34894.56865	11.6196	49.0028	-1.8309	3.408e-05	0.0010882
Cluster-34894.66526	12.9612	49.057	-1.6866	0.00021705	0.0049273
Cluster-34894.45129	14.8813	49.0634	-1.5585	9.227e-05	0.0024714
Cluster-34894.26980	166.558	49.2799	1.6797	1.185e-09	1.5973e-07
Cluster-34894.47210	10.5219	49.2863	-1.9618	1.3065e-05	0.00049111
Cluster-34894.15240	189.456	49.3326	1.8656	1.2992e-11	3.0353e-09
Cluster-34894.75301	15.0852	49.3829	-1.5364	0.00028918	0.0062046
Cluster-34894.34449	11.9261	49.4383	-1.8139	3.3086e-05	0.0010624
Cluster-34894.59162	7.48832	49.5024	-2.3057	2.8987e-06	0.00013767
Cluster-34894.99295	163.394	49.5177	1.6204	3.7328e-07	2.3998e-05
Cluster-34894.36994	8.46551	49.5228	-2.2044	2.6822e-06	0.00012901
Cluster-34894.77127	15.7134	49.5277	-1.508	0.00014526	0.0035745
Cluster-34894.57201	173.748	49.5979	1.6953	6.4183e-07	3.8305e-05
Cluster-34894.71134	12.7724	49.646	-1.7803	8.7627e-06	0.0003526
Cluster-34894.44511	296.582	49.6713	2.4551	3.8456e-17	3.3305e-14
Cluster-34894.31263	12.4828	49.6812	-1.7946	1.5884e-05	0.00058081
Cluster-34894.15556	228.706	49.8097	2.0374	1.0007e-08	1.0494e-06
Cluster-34894.96637	183.513	49.8207	1.7767	2.3309e-08	2.2049e-06
Cluster-34894.67851	170.685	49.9253	1.7027	2.9821e-10	4.7604e-08
Cluster-34894.72455	2.05446	49.9304	-3.7044	2.6848e-12	7.5396e-10
Cluster-34894.37668	12.3422	49.9895	-1.7967	3.0422e-05	0.00099229
Cluster-34894.96754	15.6029	50.0436	-1.5299	9.8445e-05	0.0026049
Cluster-34894.53200	9.6888	50.1188	-1.9738	0.00011409	0.0029318
Cluster-34894.16777	201.714	50.2335	1.928	1.7015e-12	5.0472e-10
Cluster-34894.28084	158.044	50.2828	1.5782	5.377e-08	4.504e-06
Cluster-34894.22568	10.4976	50.3356	-1.9239	0.00011823	0.0030167
Cluster-34894.41209	13.3977	50.3405	-1.7208	3.4087e-05	0.0010882
Cluster-34894.96945	585.19	50.3832	3.3215	2.839e-23	6.6847e-20
Cluster-34894.81189	9.88392	50.5544	-2.0309	1.4446e-05	0.0005346
Cluster-34894.60961	8.34088	50.5593	-2.2116	4.983e-06	0.0002186
Cluster-34894.81833	199.523	50.6124	1.9028	5.7424e-13	1.9273e-10
Cluster-34894.3496	15.038	50.616	-1.5729	0.00016284	0.0039106
Cluster-34894.78702	402.096	50.6856	2.6213	7.1036e-09	7.6846e-07
Cluster-34894.22305	163.273	50.7207	1.5888	8.373e-07	4.8085e-05
Cluster-34894.71260	10.4737	50.7597	-1.9792	2.3406e-05	0.00080349
Cluster-34894.56255	226.473	50.9108	1.9093	1.1575e-05	0.00044358
Cluster-34894.47835	248.378	51.0224	2.1569	1.5915e-11	3.6449e-09
Cluster-34894.100797	233.334	51.0513	2.0367	1.6326e-08	1.6185e-06
Cluster-34894.62406	14.655	51.0679	-1.6196	0.00010635	0.0027728
Cluster-34894.73498	157.507	51.2504	1.5531	1.7916e-08	1.7612e-06
Cluster-34894.75562	199.235	51.2731	1.8131	7.1809e-07	4.2122e-05
Cluster-34894.30669	14.0249	51.2794	-1.6375	0.00035819	0.0073694
Cluster-34894.63436	11.9714	51.3167	-1.8204	9.2993e-05	0.0024851
Cluster-34894.93280	167.343	51.3688	1.5941	3.3383e-06	0.00015522
Cluster-34894.87594	14.3173	51.4176	-1.6352	0.00020328	0.0046721
Cluster-34894.58881	5.59059	51.4482	-2.4382	2.9184e-05	0.00095812
Cluster-34894.85447	15.2964	51.4717	-1.5999	3.7795e-05	0.0011863
Cluster-34894.40504	173.681	51.478	1.6819	6.8159e-10	9.8951e-08
Cluster-34894.103764	174.13	51.5133	1.6803	4.6303e-09	5.282e-07
Cluster-34894.98267	280.212	51.5157	2.3409	7.393e-17	5.9577e-14
Cluster-34894.59478	9.38511	51.6037	-2.1443	2.4931e-06	0.00012174
Cluster-34894.10311	188.024	51.6543	1.7448	3.5908e-07	2.3204e-05
Cluster-34894.104957	186.081	51.6581	1.7774	2.2138e-11	4.8773e-09
Cluster-34894.14199	167.864	51.6807	1.6339	1.7287e-09	2.2304e-07
Cluster-34894.54456	15.3499	51.7512	-1.5684	0.00017777	0.004206
Cluster-34894.56138	13.1305	51.8114	-1.7537	4.8138e-05	0.0014427
Cluster-34102.0	15.9164	51.8191	-1.541	0.00021223	0.0048369
Cluster-34894.81644	7.04016	51.8251	-2.4588	2.7398e-07	1.8473e-05
Cluster-34894.95416	15.5538	51.8353	-1.578	6.8111e-05	0.0019206
Cluster-34894.18540	12.2128	51.9804	-1.7835	0.00024409	0.0054084
Cluster-34894.85989	168.559	52.0368	1.6268	1.3387e-09	1.7775e-07
Cluster-34894.85885	183.091	52.0682	1.7509	1.5549e-11	3.5773e-09
Cluster-34894.49297	10.3651	52.1624	-2.0151	1.6431e-05	0.00059649
Cluster-34894.58821	8.03529	52.5941	-2.3487	3.4642e-07	2.2501e-05
Cluster-34894.60292	15.9076	52.6092	-1.5823	3.0834e-05	0.0010038
Cluster-34894.45955	5.5887	52.6671	-2.6834	1.7686e-07	1.2673e-05
Cluster-34894.49891	16.5446	52.6897	-1.5081	0.0003015	0.0064108
Cluster-34894.39409	233.678	52.7629	2.0708	2.0539e-16	1.5475e-13
Cluster-34894.70873	2.18726	52.9304	-3.5581	9.3931e-11	1.7304e-08
Cluster-34894.92014	16.6827	52.9728	-1.5088	0.00014471	0.0035644
Cluster-34894.98548	163.55	52.9846	1.5021	4.2454e-05	0.0013069
Cluster-34894.92552	174.368	53.0083	1.6412	1.4088e-08	1.422e-06
Cluster-34894.31274	16.1036	53.0598	-1.5421	0.00023538	0.0052557
Cluster-34894.44216	203.676	53.1529	1.8655	1.3674e-12	4.1473e-10
Cluster-34894.56151	161.822	53.1732	1.5043	5.215e-06	0.00022703
Cluster-34894.57075	16.001	53.2913	-1.5793	7.9804e-05	0.0021909
Cluster-34894.64276	14.9748	53.3325	-1.6223	0.0002263	0.0050945
Cluster-34894.75015	180.652	53.4789	1.6853	7.8061e-10	1.1141e-07
Cluster-34894.37097	166.523	53.484	1.5628	8.1032e-08	6.4431e-06
Cluster-34894.82089	13.078	53.5832	-1.7795	0.00011158	0.0028841
Cluster-34894.23907	203.379	53.6549	1.858	1.0298e-13	4.0624e-11
Cluster-34894.21845	163.496	53.6665	1.5145	2.2362e-06	0.00011173
Cluster-34894.17130	196.817	53.7242	1.7742	9.2014e-09	9.7511e-07
Cluster-34894.33108	182.9	53.7418	1.6994	9.0452e-11	1.6725e-08
Cluster-34894.78860	10.0756	53.7467	-2.1711	1.4906e-07	1.0995e-05
Cluster-34894.104639	183.076	53.7709	1.6853	5.0914e-09	5.7428e-07
Cluster-34894.73104	16.1427	53.8462	-1.5831	6.9435e-05	0.001951
Cluster-34894.33202	259.545	53.8713	2.1934	3.0443e-19	4.2875e-16
Cluster-34894.101808	163.487	53.8788	1.5345	5.7879e-08	4.8023e-06
Cluster-34894.52000	16.7781	53.879	-1.529	0.00011034	0.0028579
Cluster-34894.76430	10.8747	53.9169	-1.9451	0.00011956	0.0030412
Cluster-34894.51343	16.7922	54.0562	-1.5153	0.00022703	0.005107
Cluster-34894.43592	12.0658	54.0915	-1.9415	3.2718e-06	0.00015274
Cluster-34894.80913	195.822	54.1384	1.7153	2.5755e-06	0.00012496
Cluster-34894.58445	171.06	54.1407	1.5908	1.7739e-08	1.7471e-06
Cluster-34894.82714	182.496	54.1482	1.6872	8.1089e-11	1.5256e-08
Cluster-34894.84190	181.837	54.1696	1.6699	1.7693e-09	2.2769e-07
Cluster-34894.42107	13.7656	54.1834	-1.7776	2.278e-05	0.00078535
Cluster-34894.12369	7.86062	54.1861	-2.2658	1.8866e-05	0.00067019
Cluster-34894.90148	15.9085	54.377	-1.607	6.0616e-05	0.0017465
Cluster-34894.92828	198.758	54.3823	1.7869	2.1237e-10	3.5284e-08
Cluster-13848.0	17.2243	54.4137	-1.5284	4.1778e-05	0.0012888
Cluster-34894.95362	164.563	54.5448	1.5028	2.4436e-06	0.00011991
Cluster-34894.89541	184.877	54.5935	1.6833	2.2923e-09	2.8495e-07
Cluster-34894.48190	11.5481	54.7244	-2.0155	1.8957e-06	9.7033e-05
Cluster-34894.17606	165.908	54.7547	1.5401	5.3056e-09	5.9444e-07
Cluster-34894.43626	15.4925	54.7558	-1.6338	8.7805e-05	0.0023734
Cluster-34894.53744	12.2128	54.7813	-1.8925	3.2053e-05	0.0010365
Cluster-34894.71850	5.07195	54.8633	-2.4562	7.0194e-05	0.0019689
Cluster-15741.0	8.54482	54.9121	-2.3061	1.6135e-06	8.4543e-05
Cluster-34894.99888	266.86	54.9249	2.0941	2.8278e-08	2.6111e-06
Cluster-34894.18072	37001.4	54.9339	3.5091	3.4325e-07	2.2344e-05
Cluster-34894.75748	176.842	55.0163	1.61	3.428e-08	3.064e-06
Cluster-34894.57823	316.076	55.0254	2.4173	4.3697e-19	5.8273e-16
Cluster-34894.104514	196.897	55.0718	1.7688	4.5429e-11	9.2263e-09
Cluster-34894.53590	16.0152	55.1813	-1.6009	0.00013813	0.0034316
Cluster-34894.48036	9.25325	55.1915	-2.2202	3.2342e-06	0.00015122
Cluster-34894.74164	172.985	55.2065	1.5895	4.0712e-10	6.2859e-08
Cluster-34894.36130	16.2755	55.2302	-1.6131	2.6352e-05	0.00088661
Cluster-34894.48462	15.0352	55.2655	-1.6933	4.3579e-05	0.0013332
Cluster-34894.13280	15.3285	55.2778	-1.6098	0.00049803	0.0095728
Cluster-34894.18154	35705.5	55.2951	2.6615	0.0001215	0.0030825
Cluster-18532.0	8.05828	55.3658	-2.1878	0.00010627	0.0027711
Cluster-34894.44809	12.7384	55.4227	-1.8992	7.1884e-06	0.00029825
Cluster-34894.92936	190.08	55.467	1.6906	1.2415e-08	1.278e-06
Cluster-34894.88458	246.29	55.4821	2.0616	5.3782e-14	2.2707e-11
Cluster-34894.33579	247.985	55.5147	2.0858	4.9791e-16	3.3496e-13
Cluster-34894.46157	12.9193	55.5171	-1.9	2.552e-06	0.00012398
Cluster-34894.13455	194.447	55.5412	1.7267	1.1581e-09	1.568e-07
Cluster-34894.79669	15.6652	55.6996	-1.6795	1.0162e-05	0.00039794
Cluster-34894.102415	227.267	55.7074	1.9414	5.2462e-12	1.3514e-09
Cluster-34894.39247	13.6017	55.8016	-1.8363	1.1392e-05	0.00043792
Cluster-34894.21275	11.0921	55.8606	-1.9564	9.8556e-05	0.0026065
Cluster-34894.78658	242.941	55.861	1.9903	2.7919e-09	3.3739e-07
Cluster-34894.28992	17.1217	55.9224	-1.5556	9.4252e-05	0.0025121
Cluster-34894.59337	14.5285	56.0218	-1.7468	2.9451e-05	0.00096507
Cluster-34894.101047	308.588	56.0898	2.3715	4.5435e-20	7.2072e-17
Cluster-34894.84067	15.781	56.0934	-1.6558	3.71e-05	0.0011689
Cluster-34894.55756	12.5666	56.1764	-1.9313	3.9392e-06	0.0001788
Cluster-34894.61537	16.9197	56.2245	-1.5858	3.9755e-05	0.0012375
Cluster-34894.63287	237.662	56.3163	1.9991	5.2961e-14	2.2522e-11
Cluster-34894.104310	214.413	56.3312	1.8488	4.2765e-11	8.768e-09
Cluster-34894.52017	6.75252	56.3969	-2.261	0.00017204	0.0040945
Cluster-34894.41409	196.973	56.427	1.7172	2.7033e-09	3.2933e-07
Cluster-34894.42380	14.4108	56.4912	-1.7148	0.00025063	0.0055195
Cluster-34894.76236	6.92969	56.6311	-2.4274	7.8394e-06	0.0003212
Cluster-34894.76188	210.901	56.7138	1.8323	1.4692e-13	5.6432e-11
Cluster-34894.49276	13.6489	56.8822	-1.8155	5.8522e-05	0.0016969
Cluster-34894.32808	236.981	56.9507	1.9409	1.1596e-09	1.5687e-07
Cluster-34894.94565	201.579	56.9519	1.6733	8.7271e-06	0.00035154
Cluster-34894.99031	236.093	57.0887	1.9609	1.7049e-12	5.0474e-10
Cluster-34894.97337	17.1085	57.3176	-1.5831	8.8059e-05	0.0023783
Cluster-13907.0	12.3544	57.3793	-1.9669	5.6952e-06	0.00024521
Cluster-34894.53686	194.726	57.382	1.6799	3.379e-09	4.0031e-07
Cluster-34894.83721	8.26251	57.4511	-2.4494	3.5991e-08	3.1899e-06
Cluster-32090.1	5.25196	57.4927	-2.8879	1.0812e-08	1.126e-06
Cluster-34894.41156	201.866	57.5268	1.6795	3.2477e-06	0.0001518
Cluster-34894.27841	205.5	57.5544	1.6111	0.00034041	0.0070703
Cluster-34894.93479	16.3538	57.5558	-1.636	7.2712e-05	0.0020265
Cluster-34894.20158	270.419	57.5621	2.0916	3.5571e-10	5.5837e-08
Cluster-34894.80755	15.2322	57.5933	-1.7529	5.0126e-06	0.00021971
Cluster-34894.79000	11.5491	57.6889	-2.0873	6.9935e-07	4.1248e-05
Cluster-34894.92690	254.616	57.7164	2.0122	1.0431e-09	1.4315e-07
Cluster-34894.100032	216.545	57.7165	1.8046	1.5955e-08	1.5859e-06
Cluster-34894.63391	219.711	57.7697	1.7189	5.5436e-05	0.0016259
Cluster-34894.108309	17.3339	57.7844	-1.5424	0.0003859	0.0078226
Cluster-34894.64521	11.7282	57.8893	-2.0596	1.279e-06	6.9381e-05
Cluster-34894.28819	16.3519	57.8929	-1.6053	0.0003411	0.0070801
Cluster-34894.60939	17.0525	57.9569	-1.6044	3.7636e-05	0.0011823
Cluster-34894.57274	18.1269	58.03	-1.5429	3.6976e-05	0.0011657
Cluster-34894.103405	10.1691	58.0625	-2.2378	2.2866e-07	1.5835e-05
Cluster-34894.83380	18.0243	58.1143	-1.5644	1.9716e-05	0.00069565
Cluster-34894.91344	185.162	58.1494	1.5885	2.205e-07	1.534e-05
Cluster-34894.96990	231.814	58.2982	1.9051	7.5701e-12	1.861e-09
Cluster-34894.47748	14.091	58.3231	-1.8379	1.4124e-05	0.00052461
Cluster-34894.89059	199.249	58.3537	1.6734	1.2781e-07	9.6155e-06
Cluster-34894.44155	10.3632	58.3898	-2.2102	3.3879e-07	2.2082e-05
Cluster-29480.0	12.8419	58.5169	-1.9436	5.2722e-06	0.00022935
Cluster-34894.74896	173.974	58.5736	1.5056	1.1399e-07	8.6974e-06
Cluster-34894.55389	228.815	58.849	1.8595	5.2646e-10	7.8549e-08
Cluster-34894.87201	15.8531	58.9259	-1.7301	1.3594e-05	0.00050756
Cluster-34894.44206	6.50736	58.9525	-2.7081	2.5229e-08	2.3658e-06
Cluster-34894.57111	13.0308	58.9623	-1.9303	1.1147e-05	0.0004296
Cluster-34894.62367	13.5296	58.9726	-1.8885	1.1483e-05	0.00044093
Cluster-34894.68720	177.182	59.0607	1.5207	1.9173e-08	1.8701e-06
Cluster-34894.61329	14.655	59.0754	-1.7832	4.2475e-05	0.0013073
Cluster-34894.49724	10.5612	59.1336	-2.1886	6.1549e-07	3.7012e-05
Cluster-34894.100919	16.3217	59.1623	-1.686	2.4517e-05	0.00083626
Cluster-34894.78166	17.4	59.1802	-1.6006	8.5011e-05	0.0023086
Cluster-34894.53384	17.9309	59.2205	-1.5472	0.00025321	0.0055655
Cluster-34894.81805	238.852	59.3474	1.9358	3.2059e-14	1.4085e-11
Cluster-34894.73942	236.799	59.4618	1.9089	4.6141e-12	1.203e-09
Cluster-34894.78752	314.684	59.5144	2.2193	1.5818e-09	2.0638e-07
Cluster-34894.78342	13.4389	59.5385	-1.8977	1.3428e-05	0.00050287
Cluster-34894.66163	8.54671	59.6935	-2.5068	4.1198e-09	4.7756e-07
Cluster-34894.47197	16.5981	59.7084	-1.6946	7.7551e-06	0.00031837
Cluster-34894.83419	214.016	59.769	1.7558	2.277e-09	2.8405e-07
Cluster-34894.41317	10.2414	59.8209	-2.1004	5.4466e-05	0.0016028
Cluster-34894.10156	266.124	59.8444	2.0271	8.0327e-10	1.143e-07
Cluster-34894.56999	193.82	59.9566	1.6229	4.1272e-09	4.7805e-07
Cluster-34894.52397	18.2516	60.0141	-1.5397	0.00023162	0.005191
Cluster-34894.96740	216.756	60.0901	1.7622	2.7665e-09	3.3485e-07
Cluster-34894.22805	191.712	60.1677	1.5437	3.6239e-05	0.0011473
Cluster-34894.56672	17.342	60.1753	-1.6034	0.00015465	0.0037539
Cluster-34894.93416	320.731	60.2435	2.3212	3.6521e-18	3.8757e-15
Cluster-34894.38460	3.59939	60.4284	-3.4298	2.4279e-12	6.9033e-10
Cluster-34894.77629	14.0722	60.447	-1.9108	1.6871e-06	8.794e-05
Cluster-34894.40318	194.257	60.4712	1.5826	1.2541e-06	6.8248e-05
Cluster-34894.1936	17.3509	60.5995	-1.6502	1.9568e-05	0.0006914
Cluster-34894.51782	12.0177	60.7367	-2.1262	6.7712e-08	5.4978e-06
Cluster-10748.0	14.0813	60.7733	-1.8432	4.5263e-05	0.0013735
Cluster-34894.83955	250.994	60.8235	1.9421	2.9285e-10	4.6947e-08
Cluster-34894.60467	16.385	60.8269	-1.6633	0.00021911	0.004966
Cluster-34894.14660	212.726	61.0246	1.6845	6.0938e-07	3.6673e-05
Cluster-34894.72931	278.851	61.0777	2.1097	2.329e-16	1.7289e-13
Cluster-34894.47842	11.1009	61.0855	-2.048	7.0131e-05	0.001968
Cluster-34894.75997	12.3019	61.2149	-2.0333	8.8802e-06	0.00035628
Cluster-34894.80543	14.2229	61.2233	-1.8569	2.5583e-05	0.00086614
Cluster-34894.69610	19.0544	61.2753	-1.5339	0.00012089	0.0030679
Cluster-34894.40387	18.7834	61.2888	-1.5585	4.9505e-05	0.0014778
Cluster-34894.80345	248.851	61.3205	1.9432	1.1416e-13	4.4917e-11
Cluster-34894.99918	182.346	61.3292	1.5117	2.019e-08	1.9491e-06
Cluster-34894.52327	19.4598	61.3393	-1.5323	2.1094e-05	0.00073788
Cluster-34894.43059	16.9499	61.3669	-1.7059	5.5268e-06	0.00023892
Cluster-34894.75349	10.8105	61.4288	-2.2614	4.0478e-08	3.5279e-06
Cluster-34894.100578	14.2833	61.6123	-1.9037	3.2281e-06	0.00015099
Cluster-34894.73399	6.30058	61.6334	-2.5275	1.065e-05	0.00041343
Cluster-34894.57887	17.4667	61.7121	-1.6339	9.0153e-05	0.0024277
Cluster-34894.97722	193.212	61.7283	1.5734	3.6049e-08	3.1899e-06
Cluster-34894.22822	213.9	61.7871	1.7057	6.6623e-09	7.2436e-07
Cluster-34894.18055	189.747	61.8439	1.558	6.3334e-09	6.9512e-07
Cluster-34894.44343	310.234	61.8552	2.0582	3.0752e-06	0.00014513
Cluster-34894.27067	10.537	62.1458	-2.3089	2.4933e-08	2.3409e-06
Cluster-34894.49298	11.7763	62.2211	-2.1153	2.0838e-06	0.0001052
Cluster-34894.71774	8.03435	62.3424	-2.4814	7.532e-07	4.3817e-05
Cluster-34268.0	11.8465	62.3508	-2.0761	1.3258e-05	0.00049725
Cluster-34894.32480	18.9962	62.3977	-1.5544	0.00017039	0.0040616
Cluster-34894.9057	250.526	62.5197	1.926	2.9231e-13	1.0438e-10
Cluster-34894.78180	19.0053	62.6503	-1.5714	6.3807e-05	0.0018214
Cluster-34894.65237	18.4608	62.7613	-1.612	3.0954e-05	0.0010062
Cluster-34894.27616	20.2277	62.8506	-1.5186	2.0028e-05	0.00070517
Cluster-34894.78867	15.8755	63.015	-1.7681	4.0844e-05	0.0012657
Cluster-34894.61667	8.80603	63.0806	-2.464	1.2313e-07	9.3007e-06
Cluster-34894.68016	14.6371	63.1866	-1.8462	5.6819e-05	0.0016587
Cluster-34894.99662	190.064	63.3449	1.5218	1.7004e-08	1.6814e-06
Cluster-34894.81829	226.243	63.4482	1.7368	3.2413e-08	2.9265e-06
Cluster-34894.32237	229.75	63.5199	1.7872	7.0784e-12	1.7486e-09
Cluster-34894.48742	11.8528	63.6285	-2.0469	4.5757e-05	0.0013843
Cluster-34894.50866	200.512	63.773	1.5914	1.9407e-09	2.4721e-07
Cluster-34894.38356	12.537	63.8558	-1.905	0.00046296	0.0090405
Cluster-23968.7	19.3021	63.9353	-1.5667	6.917e-05	0.0019443
Cluster-34894.78280	16.1206	64.1767	-1.8122	3.866e-06	0.00017601
Cluster-34894.10498	14.841	64.3792	-1.927	1.4893e-06	7.8744e-05
Cluster-34894.29696	222.675	64.4955	1.6754	6.5687e-07	3.9104e-05
Cluster-34894.103035	309.842	64.553	2.1986	1.5558e-21	2.791e-18
Cluster-34894.69758	18.4004	64.6105	-1.5988	0.00028496	0.0061389
Cluster-34894.68982	12.074	64.773	-2.071	1.5379e-05	0.00056527
Cluster-34894.75583	16.5578	64.8436	-1.8088	2.8932e-06	0.00013747
Cluster-34894.23045	12.9754	64.9178	-2.0852	8.6843e-07	4.9608e-05
Cluster-34894.44036	37404.1	64.9234	2.5687	0.00020599	0.0047218
Cluster-34894.82693	15.4711	65.0941	-1.8186	7.042e-05	0.0019732
Cluster-34894.83192	217.357	65.1342	1.6688	1.4727e-09	1.9365e-07
Cluster-34894.50860	19.3804	65.1694	-1.6006	2.545e-05	0.00086222
Cluster-34894.44960	372.09	65.2228	2.3219	2.6388e-10	4.2759e-08
Cluster-34894.95357	238.655	65.2941	1.8111	2.1284e-13	7.9586e-11
Cluster-34894.30922	8.43813	65.3813	-2.5237	1.6784e-07	1.216e-05
Cluster-34894.89142	16.8102	65.537	-1.748	5.0846e-05	0.001511
Cluster-34894.23168	200.708	65.6064	1.546	1.5417e-08	1.5376e-06
Cluster-34894.83273	20.5493	65.7005	-1.5538	1.5129e-05	0.00055757
Cluster-34894.99625	239.663	65.829	1.7874	1.0633e-10	1.9375e-08
Cluster-34894.55637	442.963	65.9005	2.6148	1.4523e-18	1.7233e-15
Cluster-34894.42958	15.7518	65.9985	-1.8185	4.3165e-05	0.0013237
[truncated: 1,264 more rows]

## Sheet: UP
gene_id	6.35Trp_readcount	1.85Trp_readcount	log2FoldChange	pval	padj
Cluster-34894.14716	2099.31	1.02802	8.7566	2.2798e-75	8.5887e-71
Cluster-34894.96460	832.728	0.344767	8.0331	4.6288e-57	8.7192e-53
Cluster-34894.91124	856.727	0.991525	7.6343	6.5488e-54	1.0965e-49
Cluster-34894.56122	10649.4	44.3962	7.2034	2.892e-76	1.4527e-71
Cluster-34894.96484	5409.45	28.3694	7.0032	1.0564e-84	7.9593e-80
Cluster-34894.61207	1669.13	7.62783	6.9367	3.8116e-63	1.1488e-58
Cluster-34894.16252	3987.96	4.39014	6.8457	4.7253e-31	2.8483e-27
Cluster-34894.101484	1176.59	6.17696	6.739	7.6289e-60	1.6423e-55
Cluster-34894.18092	23760	192.428	6.612	1.2447e-110	1.8757e-105
Cluster-34894.98053	1348.69	1.0343	6.5369	4.1946e-27	1.5802e-23
Cluster-34894.16312	201.685	0	6.4152	1.2483e-29	6.3157e-26
Cluster-34894.96472	6063.56	6.82116	6.039	6.8447e-22	1.2734e-18
Cluster-34894.22436	46500	97.3521	5.9771	2.5519e-22	5.1275e-19
Cluster-34894.17915	110.415	0	5.895	5.5092e-25	1.6132e-21
Cluster-34894.17789	1645.97	19.8546	5.8921	1.9831e-60	4.9807e-56
Cluster-34894.98572	123.129	0.344767	5.5537	2.3894e-22	4.9325e-19
Cluster-34894.10159	386.229	5.62203	5.4604	1.702e-40	1.9729e-36
Cluster-34894.101313	218.988	2.33919	5.4322	6.9571e-29	3.1769e-25
Cluster-34894.6970	253.742	3.08406	5.408	1.9851e-30	1.0683e-26
Cluster-34894.7396	87.4259	0	5.3863	2.3768e-19	3.4112e-16
Cluster-34894.12666	603.919	2.53798	5.3517	1.5195e-18	1.7889e-15
Cluster-34894.110458	197.936	3.07778	5.1223	1.1226e-27	4.572e-24
Cluster-34894.12552	228.572	4.07558	5.093	7.477e-31	4.3336e-27
Cluster-34894.5821	304.52	5.40559	5.0755	1.2573e-29	6.3157e-26
Cluster-34894.18135	52395.9	82.3533	5.0557	1.3045e-14	6.3598e-12
Cluster-34894.16829	1725.57	0.344767	4.9945	5.6095e-14	2.3547e-11
Cluster-34894.17289	5478.17	7.86174	4.9003	1.2009e-13	4.6881e-11
Cluster-5103.0	75.136	0.640477	4.8692	3.6802e-18	3.8782e-15
Cluster-34894.83944	17582.4	467.389	4.8684	1.7508e-43	2.1986e-39
Cluster-34894.13435	60.1218	0.344767	4.8415	7.6538e-17	6.135e-14
Cluster-34894.48953	4179.43	176.571	4.3565	1.3255e-51	1.9974e-47
Cluster-34894.17808	2735.63	5.12244	4.3453	1.0274e-10	1.8775e-08
Cluster-34894.15804	110.266	3.3005	4.2728	7.1567e-19	8.9873e-16
Cluster-34894.96312	65762.5	92.6082	4.2608	2.9446e-10	4.7156e-08
Cluster-34894.16038	71.2061	1.71755	4.18	1.8291e-14	8.5869e-12
Cluster-34894.8270	166.157	6.68655	4.0421	5.8135e-19	7.4876e-16
Cluster-34894.96483	2185.16	114.059	4.0059	1.3828e-34	9.4718e-31
Cluster-34894.15152	1530.54	32.157	3.9309	1.9185e-10	3.2375e-08
Cluster-34894.13522	53.6545	1.0343	3.9292	7.1558e-11	1.3702e-08
Cluster-34894.62299	8963.42	529.131	3.8193	2.6249e-29	1.276e-25
Cluster-34894.18400	1186.91	75.6019	3.7782	5.052e-37	4.2294e-33
Cluster-34894.11416	289.599	14.7636	3.7667	3.1439e-17	2.7705e-14
Cluster-34894.102395	40.8629	0.985244	3.7449	3.3377e-10	5.2557e-08
Cluster-1864.0	23.1898	0	3.6996	2.0089e-08	1.9443e-06
Cluster-34894.11427	54.9936	1.71755	3.6961	2.1085e-10	3.5148e-08
Cluster-34894.56173	23222.9	23.6331	3.6734	8.8253e-08	6.9267e-06
Cluster-34894.34268	128.529	8.09839	3.6604	3.2003e-23	7.4194e-20
Cluster-34894.6164	150.402	7.76244	3.6529	3.8027e-14	1.6514e-11
Cluster-34894.18073	462.343	34.6798	3.5779	4.5485e-37	4.0319e-33
Cluster-34894.104654	49.9764	1.92771	3.5703	2.1431e-10	3.5528e-08
Cluster-34894.8569	19.686	0	3.5698	6.9589e-08	5.6319e-06
Cluster-34894.101279	81.3751	4.55124	3.5495	7.8321e-14	3.1473e-11
Cluster-34894.18072	37001.4	54.9339	3.5091	3.4325e-07	2.2344e-05
Cluster-34894.44339	137081	197.251	3.4718	4.6491e-07	2.907e-05
Cluster-18945.0	154.827	9.80339	3.4527	7.7353e-14	3.1251e-11
Cluster-34894.94634	21.6067	0.338486	3.442	7.8749e-08	6.2821e-06
Cluster-34894.44470	77.8551	5.50627	3.3584	1.8667e-14	8.6822e-12
Cluster-34894.96945	585.19	50.3832	3.3215	2.839e-23	6.6847e-20
Cluster-15371.0	33.0847	1.58295	3.2972	5.599e-09	6.2545e-07
Cluster-34894.17293	109.842	6.98226	3.2888	1.7018e-10	2.9136e-08
Cluster-33830.1	70.7152	4.98156	3.283	4.6498e-12	1.2102e-09
Cluster-28743.0	45.3208	1.72383	3.2733	1.0754e-07	8.2726e-06
Cluster-17716.0	22.2651	0.646758	3.2682	1.7102e-07	1.2349e-05
Cluster-34894.17291	127.483	9.38307	3.2564	3.9126e-12	1.0454e-09
Cluster-34894.10964	794.281	38.3275	3.2452	5.711e-08	4.7498e-06
Cluster-34894.103787	120.219	10.4678	3.2408	1.7843e-18	2.0525e-15
Cluster-10841.0	70.7105	5.18544	3.2349	5.239e-12	1.3514e-09
Cluster-34894.83943	217.361	19.4947	3.2342	5.9504e-20	9.1499e-17
Cluster-34894.105264	23.4186	0.301991	3.2339	1.0755e-06	5.9653e-05
Cluster-34894.76020	16.0671	0	3.2032	2.1663e-06	0.00010871
Cluster-34894.104516	17.8676	0.338486	3.192	9.5699e-07	5.3952e-05
Cluster-34894.15617	103.763	9.3617	3.1741	2.8447e-17	2.5517e-14
Cluster-34894.21761	445.176	36.3775	3.1723	1.9385e-12	5.6614e-10
Cluster-20776.0	171.916	3.70688	3.1586	2.5116e-06	0.00012253
Cluster-34894.15596	136.887	12.9793	3.1552	2.2535e-18	2.5342e-15
Cluster-34894.78746	40.359	2.62981	3.1457	4.7451e-09	5.3844e-07
Cluster-34894.98462	14.4108	0	3.1382	3.5474e-06	0.00016348
Cluster-34894.11517	148.732	0.978964	3.129	5.444e-06	0.00023547
Cluster-34894.6182	16.983	0.344767	3.1027	2.23e-06	0.0001115
Cluster-34894.96307	6267.52	5.84847	3.0922	7.933e-06	0.0003245
Cluster-34894.56121	783.511	15.7272	3.0858	5.3402e-06	0.00023198
Cluster-34894.6209	14.824	0	3.0797	5.9241e-06	0.00025311
Cluster-34894.18156	27505.7	37.7308	3.0797	8.6208e-06	0.00034847
Cluster-34894.14429	68.1766	6.05744	3.0664	1.2442e-11	2.916e-09
Cluster-34894.17292	213.648	19.3552	3.06	3.1925e-12	8.7472e-10
Cluster-34894.67962	384.488	42.0762	3.0403	1.8272e-24	4.7475e-21
Cluster-32884.1	17.8462	0	3.0379	9.0446e-06	0.00036067
Cluster-34894.10664	54.114	2.99851	3.0377	4.188e-07	2.6484e-05
Cluster-34894.70842	453.736	43.5057	3.0338	4.8884e-13	1.6742e-10
Cluster-34894.96325	17.6076	0	3.0304	9.5286e-06	0.00037648
Cluster-34894.83945	8146.94	8.24928	3.0174	1.3188e-05	0.00049484
Cluster-34894.75809	223.939	24.3066	3.0069	3.0995e-20	5.0224e-17
Cluster-34894.15713	37.1231	3.00479	2.948	2.3085e-08	2.1879e-06
Cluster-34894.92759	577.429	36.6392	2.9287	1.2242e-06	6.6817e-05
Cluster-34894.74878	209.681	25.3144	2.9176	9.9658e-25	2.6818e-21
Cluster-34894.83424	30.0502	2.2662	2.9086	1.4294e-07	1.0611e-05
Cluster-34894.63892	68.8556	4.37129	2.9086	1.361e-06	7.3301e-05
Cluster-16584.0	61.4974	6.32294	2.9027	4.6693e-11	9.4195e-09
Cluster-34894.70841	275.665	26.7113	2.9005	1.0202e-09	1.4027e-07
Cluster-9183.0	12.0347	0	2.8983	2.2381e-05	0.00077408
Cluster-34894.58247	151.28	17.9269	2.8932	4.6397e-19	6.0798e-16
Cluster-34894.11016	780.23	97.0236	2.8926	1.2766e-27	4.9328e-24
Cluster-34894.96308	55478.5	27.175	2.89	3.032e-05	0.00098939
Cluster-34894.5263	22.6349	1.36651	2.8875	1.8025e-06	9.2926e-05
Cluster-34894.96785	4747.31	4.82045	2.8793	3.2436e-05	0.0010453
Cluster-34894.7359	148.475	2.75185	2.8765	2.7019e-05	0.00090501
Cluster-34894.65578	70.2591	7.53719	2.8675	1.6633e-11	3.7747e-09
Cluster-34894.106723	17.1557	0.683253	2.8636	9.2591e-06	0.00036825
Cluster-34894.17294	387.832	42.4877	2.859	1.2058e-11	2.8393e-09
Cluster-26287.0	32.5506	2.36431	2.8478	1.0055e-06	5.6372e-05
Cluster-34894.1342	28.2327	2.23598	2.8252	4.1726e-07	2.6431e-05
Cluster-34894.14783	200.847	24.9935	2.818	3.686e-17	3.2294e-14
Cluster-7344.0	41.3529	3.51066	2.8177	2.26e-07	1.5694e-05
Cluster-34894.14774	75.3701	8.66332	2.8155	9.0754e-12	2.1943e-09
Cluster-34894.85329	99.5631	12.1426	2.8077	9.1715e-15	4.607e-12
Cluster-34894.26734	28.8055	2.19949	2.7983	1.0112e-06	5.6647e-05
Cluster-34894.45879	2231.15	300.356	2.7928	2.117e-28	9.1147e-25
Cluster-34894.109736	30.1453	2.39453	2.7731	1.722e-06	8.9418e-05
Cluster-34894.95221	5450.15	757.974	2.7724	3.0279e-36	2.2815e-32
Cluster-34894.15898	968.621	131.57	2.7723	9.79e-26	3.2071e-22
Cluster-34894.100671	174.736	21.615	2.769	6.1356e-14	2.5471e-11
Cluster-34894.34267	132.163	16.8612	2.7632	1.2155e-15	7.4763e-13
Cluster-34894.95554	44.0053	3.77616	2.7627	6.948e-07	4.1011e-05
Cluster-34894.35049	58.1901	6.38084	2.7622	1.4029e-09	1.8529e-07
Cluster-34894.78750	186.381	21.9407	2.7582	1.0422e-10	1.9014e-08
Cluster-17148.0	145.251	19.0204	2.7507	1.3211e-16	1.0315e-13
Cluster-34894.67963	110.786	13.9571	2.7487	4.0785e-13	1.4129e-10
Cluster-34894.69495	152.719	19.2016	2.7402	6.8927e-13	2.2728e-10
Cluster-34894.70840	379.899	44.2003	2.735	9.0476e-10	1.2671e-07
Cluster-35523.0	67.7304	5.84219	2.7269	2.1376e-06	0.00010748
Cluster-34894.36758	180.747	6.59981	2.7198	5.7182e-05	0.0016659
Cluster-34894.70713	56.4762	6.61356	2.7143	1.7024e-09	2.1983e-07
Cluster-34894.99039	213.911	29.6078	2.7111	7.72e-20	1.1634e-16
Cluster-34894.35050	77.0504	9.48255	2.7072	8.8861e-11	1.6491e-08
Cluster-34894.26260	55.7124	6.67399	2.7016	1.289e-09	1.7173e-07
Cluster-34894.78701	349.014	41.3767	2.7004	2.2571e-09	2.8226e-07
Cluster-34894.18044	26.2406	2.35803	2.6939	1.9384e-06	9.8917e-05
Cluster-34894.96309	12.4728	0	2.6895	9.6879e-05	0.0025716
Cluster-34894.99317	25.0557	2.04976	2.6868	5.5432e-06	0.00023955
Cluster-34894.14781	116.959	15.6507	2.6867	2.2162e-13	8.2462e-11
Cluster-34894.10657	113.302	15.4368	2.6834	8.8031e-15	4.4666e-12
Cluster-34894.52613	6783.21	995.052	2.6821	1.312e-28	5.815e-25
Cluster-34894.97670	88.747	11.6455	2.6791	1.4258e-12	4.3025e-10
Cluster-34894.17744	98.1869	12.9844	2.679	2.8919e-12	8.0704e-10
Cluster-34894.13201	108.772	14.1182	2.6658	3.8517e-11	8.017e-09
Cluster-34894.97895	41.2352	4.40779	2.6644	3.2937e-07	2.1589e-05
Cluster-34894.75854	3346.63	468.958	2.6633	8.5182e-16	5.3709e-13
Cluster-34894.18154	35705.5	55.2951	2.6615	0.0001215	0.0030825
Cluster-34894.15623	597.71	85.3643	2.6599	3.5978e-18	3.8542e-15
Cluster-34894.51231	282.737	19.7692	2.6581	2.5678e-05	0.00086896
Cluster-34894.73176	30.1216	2.91296	2.6555	1.4194e-06	7.5794e-05
Cluster-34894.83327	33.8454	3.58993	2.6482	3.6633e-07	2.3591e-05
Cluster-34894.97956	279.33	41.8106	2.648	1.4749e-25	4.729e-22
Cluster-34894.97660	123.095	13.3217	2.6467	4.0273e-07	2.564e-05
Cluster-34894.14791	31.6593	3.17845	2.6453	8.7358e-07	4.977e-05
Cluster-34894.95558	93.5828	11.6153	2.6348	5.2652e-09	5.9124e-07
Cluster-34894.38828	451.004	68.329	2.6226	1.0585e-23	2.6148e-20
Cluster-34894.97108	12.9773	0.344767	2.6217	0.00010872	0.0028232
Cluster-34894.78702	402.096	50.6856	2.6213	7.1036e-09	7.6846e-07
Cluster-34894.48346	284.263	35.9671	2.6202	4.6185e-09	5.2726e-07
Cluster-34894.55637	442.963	65.9005	2.6148	1.4523e-18	1.7233e-15
Cluster-34894.16182	35.3336	3.27657	2.6136	6.1062e-06	0.00025964
Cluster-1427.0	9.80022	0	2.6133	0.00015127	0.003691
Cluster-34894.15239	206.124	30.8773	2.6044	1.525e-17	1.4363e-14
Cluster-34894.78749	34.5261	3.91076	2.5999	3.6654e-07	2.3595e-05
Cluster-34894.15557	46.8956	5.33517	2.5875	3.7476e-07	2.4082e-05
Cluster-34894.101479	221.041	33.0756	2.587	8.2249e-16	5.2078e-13
Cluster-14874.0	15.7738	0.948749	2.5812	5.6842e-05	0.0016591
Cluster-29592.0	11.7433	0.338486	2.5794	0.0001379	0.0034274
Cluster-34894.7841	115.371	16.9165	2.5785	7.7082e-14	3.1225e-11
Cluster-34894.96812	213.403	32.1231	2.5719	2.5729e-15	1.4639e-12
Cluster-34894.56494	76.4175	10.8138	2.5711	4.0539e-11	8.403e-09
Cluster-4270.1	45.7938	5.85613	2.5691	2.8506e-08	2.6225e-06
Cluster-34894.44036	37404.1	64.9234	2.5687	0.00020599	0.0047218
Cluster-34894.35044	742.411	117.916	2.5686	2.0367e-26	7.1375e-23
Cluster-12392.0	57.1	6.64006	2.567	4.9907e-07	3.0873e-05
Cluster-34894.17432	27.2206	2.91924	2.566	2.2097e-06	0.00011059
Cluster-34894.16163	12.7135	0.344767	2.5659	0.00016116	0.0038776
Cluster-34894.18155	10505.7	17.5077	2.5642	0.00021111	0.0048166
Cluster-34233.0	27.3663	2.61725	2.5638	9.3862e-06	0.00037212
Cluster-34894.22488	186.563	25.1168	2.5614	3.5314e-09	4.155e-07
Cluster-34894.61603	680.579	99.6748	2.5605	2.0936e-12	6.0666e-10
Cluster-34894.23832	14.4662	0.676972	2.5599	0.00011495	0.0029491
Cluster-34894.110712	23.7717	2.0372	2.5443	2.983e-05	0.00097574
Cluster-34894.13200	191.178	29.3385	2.5415	1.556e-14	7.4916e-12
Cluster-34894.102709	350.584	6.18324	2.5415	0.00024113	0.0053571
Cluster-34894.36278	101.281	14.6101	2.5383	2.5161e-10	4.0902e-08
Cluster-34894.109486	18.5197	0.985244	2.5354	0.00012468	0.0031498
Cluster-34894.99686	279.024	42.1064	2.5353	3.4116e-13	1.2046e-10
Cluster-34894.96944	46.8921	5.92403	2.5348	2.3601e-07	1.6232e-05
Cluster-34894.14125	289.983	42.2242	2.5347	1.2131e-10	2.1685e-08
Cluster-34894.54002	25.0503	2.66002	2.534	5.8049e-06	0.00024873
Cluster-7665.0	13.275	0.640477	2.532	0.00013014	0.0032647
Cluster-34894.12248	104.393	16.115	2.5269	5.7298e-14	2.3918e-11
Cluster-34894.101442	1257.32	32.5076	2.5196	0.00026339	0.0057558
Cluster-34894.101998	18.7781	1.632	2.5133	3.4245e-05	0.0010924
Cluster-34894.15114	18.8785	1.0343	2.5119	0.00014824	0.0036323
Cluster-1082.0	9.20415	0	2.5118	0.00027943	0.0060467
Cluster-34894.25633	57.978	8.2016	2.5071	5.9419e-09	6.5694e-07
Cluster-34894.15032	96.5863	14.9007	2.507	2.2269e-12	6.4041e-10
Cluster-34894.23059	65.4361	9.41075	2.5061	1.5459e-09	2.0222e-07
Cluster-34894.15626	208.234	33.1649	2.5028	6.0726e-16	3.9857e-13
Cluster-34894.100347	110.837	3.035	2.5028	0.00028466	0.0061343
Cluster-34894.56301	171.211	26.9073	2.5009	6.2538e-14	2.5819e-11
Cluster-8208.0	13.6278	0.676972	2.5004	0.00017019	0.0040575
Cluster-34894.34704	254.723	39.9192	2.4981	5.1186e-13	1.7412e-10
Cluster-34894.56039	161.166	23.0811	2.4922	9.5876e-09	1.0111e-06
Cluster-1826.1	10.8504	0	2.4917	0.00031861	0.0067039
Cluster-34894.98727	135.567	21.9283	2.4909	4.3358e-16	2.9432e-13
Cluster-34894.94885	112.238	17.5935	2.4894	7.5633e-13	2.4617e-10
Cluster-8078.4	39.1754	4.95644	2.4833	1.1463e-06	6.302e-05
Cluster-18383.0	19.5762	1.37907	2.4833	0.00011928	0.0030374
Cluster-34894.101122	41.5341	5.65225	2.4825	1.6805e-07	1.217e-05
Cluster-34894.69855	50.3874	7.04016	2.4794	2.9661e-08	2.7155e-06
Cluster-34894.6330	77.373	11	2.4785	1.8567e-08	1.8168e-06
Cluster-34894.44227	52.1942	7.50069	2.475	1.2869e-08	1.3175e-06
Cluster-35406.1	12.6619	0.603983	2.4736	0.00020093	0.0046297
Cluster-34894.77898	41.2458	4.37011	2.4724	2.1267e-05	0.00074302
Cluster-34894.14957	11.1472	0.338486	2.4702	0.00028682	0.0061675
Cluster-34894.33325	33.6754	4.04418	2.4659	5.3694e-06	0.00023305
Cluster-25114.0	27.5441	3.29422	2.464	4.9102e-06	0.00021579
Cluster-34894.28007	203.171	32.7246	2.461	3.7184e-13	1.3031e-10
Cluster-34894.45002	172.426	27.4535	2.4577	2.401e-12	6.8527e-10
Cluster-34894.11709	44.7389	6.12791	2.4573	2.3155e-07	1.6014e-05
Cluster-34894.12066	30.3923	3.60877	2.4566	6.652e-06	0.00027969
Cluster-34894.44511	296.582	49.6713	2.4551	3.8456e-17	3.3305e-14
Cluster-34894.67961	253.808	40.9485	2.4537	3.5762e-12	9.6753e-10
Cluster-34894.101013	225.92	36.8	2.4491	1.2765e-12	3.9097e-10
Cluster-34894.32780	48.9057	7.05525	2.4429	1.1692e-07	8.8765e-06
Cluster-34894.97960	419.42	73.2165	2.441	8.6801e-25	2.3782e-21
Cluster-34894.33968	22.2286	2.23598	2.43	4.2673e-05	0.0013113
Cluster-34894.98356	32.4288	3.95354	2.4292	8.5101e-06	0.00034483
Cluster-34894.14462	11.5151	0.338486	2.4264	0.00038953	0.0078728
Cluster-34894.78551	101.011	16.0949	2.4263	2.3888e-10	3.9002e-08
Cluster-34894.96294	18.4948	1.65594	2.4193	9.901e-05	0.002616
Cluster-34894.76197	858.264	148.873	2.4191	1.0067e-17	9.9156e-15
Cluster-34894.57823	316.076	55.0254	2.4173	4.3697e-19	5.8273e-16
Cluster-34894.99140	20.9505	1.59551	2.4142	0.00017794	0.0042094
Cluster-34894.47034	101.537	14.6629	2.4115	3.1911e-07	2.1003e-05
Cluster-25214.0	11.7452	0.640477	2.411	0.00028555	0.006149
Cluster-34894.15666	218.378	37.6658	2.4109	2.7876e-16	2.0196e-13
Cluster-34894.14780	9.00809	0	2.4061	0.00051141	0.0097825
Cluster-34894.40968	148.651	21.1756	2.4057	7.7111e-07	4.4676e-05
Cluster-34894.88457	720.264	129.504	2.4041	7.192e-25	2.007e-21
Cluster-34894.67186	55.2075	8.04306	2.4029	2.387e-07	1.6373e-05
Cluster-34894.101476	60.2515	9.07108	2.4026	6.062e-08	4.9945e-06
Cluster-34894.101777	38.714	4.99293	2.4001	7.0301e-06	0.00029305
Cluster-34894.89318	102.859	16.6194	2.3996	1.0973e-09	1.4977e-07
Cluster-34894.93415	59.9141	9.03711	2.3996	1.1884e-07	9.004e-06
Cluster-34894.88212	80.4203	9.83241	2.3953	1.8182e-05	0.0006502
Cluster-36695.0	33.4819	4.55124	2.3922	2.5884e-06	0.00012539
Cluster-34894.36640	148.296	25.8932	2.3881	6.1294e-15	3.2184e-12
Cluster-34894.8057	52.3868	7.97888	2.3866	1.3187e-07	9.862e-06
Cluster-34894.54893	224.664	38.3779	2.3846	1.2628e-12	3.8757e-10
Cluster-34894.105633	185.784	32.9069	2.3838	2.2334e-16	1.6661e-13
Cluster-34894.8992	69.066	11.2743	2.3808	2.3314e-09	2.8907e-07
Cluster-34894.86786	60.4488	9.6939	2.3762	5.0336e-09	5.682e-07
Cluster-34894.83425	240.132	43.0878	2.3746	7.8295e-18	7.8657e-15
Cluster-34894.6236	15.9085	1.36023	2.3743	0.00019013	0.0044318
Cluster-34894.101047	308.588	56.0898	2.3715	4.5435e-20	7.2072e-17
Cluster-5991.0	18.6909	1.96421	2.3691	7.9201e-05	0.0021787
Cluster-28175.0	15.8453	1.36023	2.3691	0.00019787	0.0045755
Cluster-34368.0	51.8911	8.09211	2.3673	5.5507e-08	4.6419e-06
Cluster-34894.72788	251.45	45.383	2.367	7.6285e-18	7.7673e-15
Cluster-34894.83426	85.1681	14.3056	2.3658	2.0065e-10	3.3672e-08
Cluster-34894.13199	68.2654	10.6138	2.3626	1.5247e-07	1.1219e-05
Cluster-34894.15624	237.703	41.0846	2.3606	3.9855e-12	1.0611e-09
Cluster-34894.97792	523.031	93.6197	2.3556	4.8533e-15	2.612e-12
Cluster-34894.105672	76.1868	12.9302	2.3545	5.2401e-10	7.8261e-08
Cluster-34894.74877	1299.31	246.662	2.3535	2.3759e-36	1.8844e-32
Cluster-34894.20150	59.5937	9.44606	2.352	7.3808e-08	5.9351e-06
Cluster-34894.23146	42.6265	6.63749	2.3514	2.4041e-07	1.6467e-05
Cluster-34894.74876	499.12	93.4549	2.3506	5.5666e-25	1.6132e-21
Cluster-34894.71656	21.4982	2.61097	2.3506	3.3291e-05	0.0010676
Cluster-34894.86393	22.1619	2.58075	2.3458	5.2506e-05	0.0015542
Cluster-34894.21929	13.274	0.978964	2.3455	0.00032261	0.0067721
Cluster-34894.44966	616.839	112.169	2.3437	1.3163e-15	8.0305e-13
Cluster-34894.9676	21.5133	2.65374	2.3429	3.5517e-05	0.0011268
Cluster-34894.98267	280.212	51.5157	2.3409	7.393e-17	5.9577e-14
Cluster-34894.13548	20.8549	2.36431	2.3371	8.4395e-05	0.0022936
Cluster-34894.97958	157.571	28.7155	2.3365	2.3007e-15	1.3233e-12
Cluster-34894.104799	14.4026	1.02802	2.3354	0.00039158	0.0079057
Cluster-24797.8	37.1543	5.56042	2.3333	1.4486e-06	7.7081e-05
Cluster-34894.20557	36.8471	5.48115	2.3309	1.6621e-06	8.6876e-05
Cluster-34894.15888	40.2772	6.24995	2.3293	5.7578e-07	3.5001e-05
Cluster-34894.68011	66.0517	10.532	2.329	1.2083e-07	9.1364e-06
Cluster-34894.44960	372.09	65.2228	2.3219	2.6388e-10	4.2759e-08
Cluster-34894.15715	85.1221	15.1234	2.3213	3.598e-11	7.5515e-09
Cluster-34894.93416	320.731	60.2435	2.3212	3.6521e-18	3.8757e-15
Cluster-34894.15619	36.2378	5.05711	2.3191	8.8275e-06	0.00035436
Cluster-15391.2	29.9344	4.32852	2.3182	6.7372e-06	0.00028272
Cluster-34894.18001	73.8232	12.0921	2.3174	1.538e-07	1.13e-05
Cluster-34894.7444	17.4516	1.69871	2.3172	0.00022492	0.0050724
Cluster-34894.71830	399.788	71.6941	2.3161	1.0272e-11	2.4492e-09
Cluster-34894.44509	94.9472	17.1179	2.3093	2.2908e-11	5.0103e-09
Cluster-14781.0	22.2258	2.64746	2.3083	8.1803e-05	0.0022368
Cluster-34894.41362	5870.03	1106.72	2.3071	6.4872e-17	5.342e-14
Cluster-34894.72145	163.438	30.0167	2.307	7.8297e-13	2.5352e-10
Cluster-34894.16375	36.2045	5.32632	2.3052	6.6132e-06	0.00027829
Cluster-34894.53523	446.526	86.0624	2.3047	1.4789e-22	3.0953e-19
Cluster-34894.76198	79.6351	14.2049	2.3001	4.0773e-10	6.2889e-08
Cluster-34894.27823	145.73	27.11	2.2991	2.4968e-13	9.0664e-11
Cluster-34894.101474	16.6273	1.61944	2.2989	0.00024462	0.0054161
Cluster-34894.22349	31.4302	4.29712	2.2982	2.6093e-05	0.00087964
Cluster-34894.36913	20.1546	2.30269	2.2972	0.00012754	0.0032114
Cluster-34894.17029	35.0857	4.74884	2.2957	2.4801e-05	0.0008444
Cluster-34894.56231	1909.79	377.094	2.2946	6.7017e-33	4.3909e-29
Cluster-34894.75218	107.67	19.7653	2.2933	1.0519e-11	2.5003e-09
Cluster-34894.9976	47.9971	7.74107	2.2922	4.7692e-07	2.9707e-05
Cluster-6028.0	20.8593	1.81195	2.2868	0.00038377	0.0077942
Cluster-34894.7571	20.0067	2.18693	2.2854	0.00016429	0.0039391
Cluster-34894.16458	70.9779	12.0003	2.2838	1.414e-07	1.0518e-05
Cluster-34894.12200	17.3669	1.93399	2.2831	0.00015649	0.0037901
Cluster-34894.14566	36.4578	5.37794	2.2815	7.6123e-06	0.00031334
Cluster-34894.29906	34.7552	5.24587	2.2804	6.6662e-06	0.00028014
Cluster-34894.18650	46.9255	7.64039	2.2801	9.3979e-07	5.3121e-05
Cluster-34894.78747	132.745	22.8555	2.279	4.6396e-08	3.9703e-06
Cluster-34894.81506	98.1623	18.1396	2.2783	3.1105e-11	6.6564e-09
Cluster-34894.86738	71.5007	12.8937	2.2779	1.2565e-09	1.6786e-07
Cluster-34894.100704	95.3645	17.2576	2.2773	9.6789e-10	1.3424e-07
Cluster-34894.35042	117.353	21.3206	2.2744	2.3273e-10	3.8162e-08
Cluster-34894.98621	30.3967	4.59402	2.2734	7.537e-06	0.00031066
Cluster-34894.48080	67.5796	12.0696	2.2728	2.9572e-09	3.5509e-07
Cluster-34894.100733	162.113	27.4332	2.2721	2.7847e-07	1.8725e-05
Cluster-34894.86389	373.415	72.5849	2.2714	9.0831e-18	9.0051e-15
Cluster-34894.22276	197.314	37.944	2.2699	2.9149e-15	1.6452e-12
Cluster-34894.11910	24.4524	3.13568	2.2699	6.5227e-05	0.0018546
Cluster-34894.61274	148.055	28.4991	2.2691	3.9742e-15	2.1938e-12
Cluster-34894.78703	2794.17	363.799	2.268	9.0277e-05	0.0024298
Cluster-34894.61202	3734.87	726.743	2.2663	9.2052e-17	7.3009e-14
Cluster-34894.37204	166.435	31.8261	2.2663	2.1919e-14	1.007e-11
Cluster-34894.15562	40.2756	6.50917	2.2661	1.5436e-06	8.1249e-05
Cluster-34894.17296	44.3763	7.29562	2.2646	1.1423e-06	6.2847e-05
Cluster-34894.71836	2615.25	491.624	2.264	8.1027e-12	1.979e-09
Cluster-34894.40969	283.125	28.8209	2.2627	0.00038533	0.0078141
Cluster-34894.97959	215.819	42.4297	2.2622	8.1555e-19	9.9112e-16
Cluster-34894.71829	244.766	47.775	2.2605	5.4255e-17	4.5675e-14
Cluster-34894.83726	37.7538	5.45093	2.2575	2.2624e-05	0.00078051
Cluster-34894.984	247.826	48.0909	2.2572	5.0479e-15	2.6975e-12
Cluster-34894.71835	137.782	26.1197	2.2525	3.1322e-12	8.6133e-10
Cluster-34894.99338	106.174	19.6847	2.2502	1.1714e-09	1.5817e-07
Cluster-34894.76993	76.6689	14.1496	2.2475	1.4701e-09	1.9348e-07
Cluster-34894.8282	223.374	43.4314	2.2457	4.7516e-14	2.0458e-11
Cluster-18299.0	20.3195	2.0372	2.2448	0.00042882	0.0085162
Cluster-34894.105756	20.0067	2.61097	2.2435	9.8325e-05	0.0026022
Cluster-34894.1649	104.088	19.9515	2.2413	6.2783e-12	1.5768e-09
Cluster-34894.89626	1062.96	204.506	2.2407	4.2118e-12	1.1115e-09
Cluster-34894.84548	198.365	37.6404	2.2395	7.5871e-11	1.4418e-08
Cluster-34894.11749	118.004	21.7484	2.2392	3.5437e-09	4.1655e-07
Cluster-34894.20988	38.9085	6.00211	2.2375	1.5458e-05	0.00056774
Cluster-34894.96653	25.6568	3.09918	2.233	0.00018405	0.0043261
Cluster-34894.23171	184.566	35.5934	2.2308	3.4757e-12	9.4713e-10
Cluster-34894.14562	345.846	41.6786	2.2303	0.00025911	0.0056762
Cluster-34894.13583	147.97	27.6071	2.2301	1.6176e-09	2.1032e-07
Cluster-34894.92843	204.841	40.8858	2.2283	1.8223e-16	1.3869e-13
Cluster-34894.20157	44.1218	6.96717	2.2248	8.7778e-06	0.00035311
Cluster-34894.72210	1309.99	264.864	2.2231	7.7658e-18	7.8541e-15
Cluster-34894.99089	136.244	26.8696	2.2194	2.131e-12	6.1403e-10
Cluster-34894.78752	314.684	59.5144	2.2193	1.5818e-09	2.0638e-07
Cluster-34894.22821	47.0473	8.02912	2.2184	2.205e-06	0.00011043
Cluster-34894.16456	37.6613	6.30529	2.2177	3.7294e-06	0.00017087
Cluster-34894.44967	597.996	119.169	2.2173	4.7026e-14	2.0305e-11
Cluster-34894.48898	185.79	37.2417	2.2154	1.5806e-14	7.5855e-12
Cluster-34894.15711	141.542	27.8323	2.2154	2.9174e-12	8.105e-10
Cluster-34894.85504	20.2579	2.69652	2.2147	0.00014471	0.0035644
Cluster-34894.66552	18.4797	2.06232	2.2144	0.00039995	0.0080349
Cluster-34894.15189	34.477	5.48115	2.2136	1.139e-05	0.00043792
Cluster-34894.99968	156.626	29.2454	2.2114	6.5364e-09	7.1273e-07
Cluster-34894.102217	34.6287	5.54786	2.2114	1.1767e-05	0.00044973
Cluster-34894.100732	33.0743	5.22821	2.211	1.5931e-05	0.00058185
Cluster-34894.83985	27.7534	4.31596	2.2086	2.6075e-05	0.00087926
Cluster-34894.11503	54.0768	9.81595	2.2085	1.1186e-07	8.5567e-06
Cluster-34894.29041	26.538	3.88564	2.2054	5.5094e-05	0.0016181
Cluster-34894.11548	47.6915	8.60798	2.2051	2.9291e-07	1.9557e-05
Cluster-16758.1	73.4915	13.5493	2.2048	3.7793e-08	3.3247e-06
Cluster-34894.103692	36.7857	6.25623	2.2048	3.3224e-06	0.00015474
Cluster-26774.0	38.0962	6.59472	2.2043	1.7791e-06	9.2065e-05
Cluster-34894.94564	157.945	30.3966	2.204	4.0682e-10	6.2859e-08
Cluster-34894.7859	20.5144	2.58075	2.202	0.00022319	0.0050403
Cluster-34894.82824	36.5255	6.12791	2.2014	4.159e-06	0.0001872
Cluster-34894.17060	238.449	48.7059	2.201	2.666e-16	1.9409e-13
Cluster-34894.86559	2015.6	412.251	2.2001	3.0231e-16	2.159e-13
Cluster-34894.28951	995.338	204.364	2.1992	2.8242e-17	2.5484e-14
Cluster-34894.22373	19.4267	2.65374	2.1989	0.00013964	0.0034632
Cluster-34894.103035	309.842	64.553	2.1986	1.5558e-21	2.791e-18
Cluster-34894.15257	39.3809	6.86649	2.1981	1.494e-06	7.8967e-05
Cluster-34894.96807	327.248	67.817	2.1976	3.8425e-19	5.3122e-16
Cluster-34894.81981	99.8892	19.0909	2.1953	2.7292e-09	3.3211e-07
Cluster-34894.16854	38.9919	6.44246	2.1939	8.5371e-06	0.00034574
Cluster-34894.32236	36.8638	6.09141	2.1938	7.1667e-06	0.0002976
Cluster-34894.33202	259.545	53.8713	2.1934	3.0443e-19	4.2875e-16
Cluster-34894.60304	125.069	23.5642	2.1933	2.3126e-08	2.1904e-06
Cluster-34894.35505	68.2503	11.9589	2.193	1.463e-06	7.7629e-05
Cluster-19987.1	37.1366	6.32294	2.192	5.7928e-06	0.00024835
Cluster-34894.11114	112.81	17.7799	2.1917	3.2105e-05	0.0010375
Cluster-34894.14869	42.0084	7.29681	2.1913	3.057e-06	0.00014446
Cluster-34894.90725	157.151	30.5125	2.1905	9.7503e-10	1.348e-07
Cluster-34894.48534	116.119	21.2627	2.1879	4.1376e-07	2.6264e-05
Cluster-34671.3	24.3385	3.60249	2.187	7.1154e-05	0.0019915
Cluster-34894.5266	110.052	21.9825	2.1858	2.2776e-11	4.9887e-09
Cluster-34894.84745	225.46	46.5192	2.1838	4.3071e-15	2.337e-12
Cluster-34894.6070	40.0654	6.72561	2.1822	7.4812e-06	0.00030878
Cluster-34894.104525	20.7765	2.99223	2.1822	0.00011387	0.0029292
Cluster-34894.56798	24.7338	3.23888	2.1821	0.00023119	0.0051843
Cluster-34894.61660	8081.7	1714.66	2.1804	8.7836e-24	2.2061e-20
Cluster-34894.34561	83.2697	16.3855	2.18	6.4889e-10	9.507e-08
Cluster-34894.71831	138.931	26.9817	2.1797	2.3316e-09	2.8907e-07
Cluster-34894.46098	4598.37	950.763	2.1791	3.1159e-15	1.7455e-12
Cluster-34894.82354	65.1082	12.403	2.1788	2.6507e-08	2.4703e-06
Cluster-34894.84852	1218.51	251.145	2.1782	1.3711e-14	6.6435e-12
Cluster-34894.13942	71.7763	13.3166	2.1781	3.2385e-07	2.1251e-05
Cluster-34894.75852	338.538	69.6443	2.178	3.2621e-14	1.429e-11
Cluster-34894.63399	69.6209	10.0928	2.1762	0.00012737	0.0032092
Cluster-34894.17004	78.7463	15.2329	2.1759	1.4069e-08	1.4217e-06
Cluster-34894.66718	717.669	150.067	2.1758	2.483e-17	2.2677e-14
Cluster-34894.5288	46.6892	8.462	2.1758	6.9752e-07	4.1156e-05
Cluster-34894.71839	243.627	48.2004	2.1756	4.5153e-10	6.8939e-08
Cluster-34894.92604	47.2469	8.18904	2.1742	4.8663e-06	0.00021405
Cluster-34894.16126	505.227	103.969	2.1737	2.3472e-13	8.6693e-11
Cluster-34894.11566	70.7214	13.6651	2.1731	9.7585e-09	1.0262e-06
Cluster-34894.46248	40.5214	6.99991	2.1721	7.1749e-06	0.00029781
Cluster-34894.10374	23.8082	3.55972	2.1721	7.8222e-05	0.0021577
Cluster-34894.88456	136.531	27.3743	2.172	1.5939e-10	2.7641e-08
Cluster-34894.97235	82.3206	13.3191	2.1716	2.8983e-05	0.00095362
Cluster-34894.100280	35.5347	5.70759	2.171	4.0037e-05	0.001244
Cluster-34345.0	54.2206	9.66369	2.1702	1.5981e-06	8.3823e-05
Cluster-34894.42359	52.0025	9.22081	2.1695	1.7161e-06	8.9142e-05
Cluster-34894.21351	104.738	21.123	2.168	3.7279e-11	7.7917e-09
Cluster-34894.89243	46.5715	8.55265	2.1663	7.1713e-07	4.2082e-05
Cluster-36750.0	118.424	21.3092	2.165	1.7859e-06	9.2353e-05
Cluster-34894.83045	34.8364	5.9354	2.1644	1.168e-05	0.00044674
Cluster-34894.24607	68.4901	13.2776	2.1629	1.316e-08	1.3409e-06
Cluster-34894.18810	19.9913	2.61097	2.1611	0.00029903	0.0063675
Cluster-34894.21651	95.8593	19.3413	2.1593	2.0588e-10	3.4433e-08
Cluster-34894.82711	188.82	39.8741	2.1587	2.0045e-16	1.5179e-13
Cluster-34894.89491	364.725	77.5929	2.1582	3.8496e-18	4.0286e-15
Cluster-34894.36582	60.9291	11.7311	2.1575	5.0096e-08	4.2411e-06
Cluster-34894.102369	37.4482	6.50917	2.1571	7.326e-06	0.00030325
Cluster-34894.47835	248.378	51.0224	2.1569	1.5915e-11	3.6449e-09
Cluster-34894.97377	71.0937	13.9457	2.155	2.7241e-08	2.5278e-06
Cluster-34894.84846	23.5136	3.60249	2.1509	9.526e-05	0.0025336
Cluster-34894.14416	33.2965	5.47487	2.1508	2.8451e-05	0.00094021
Cluster-34894.78553	153.51	31.889	2.1507	2.4138e-12	6.8761e-10
Cluster-34894.27821	48.8994	9.1994	2.1494	4.7893e-07	2.9803e-05
Cluster-34894.27648	114.722	23.2973	2.1492	7.4657e-10	1.0715e-07
Cluster-34894.43538	70.1662	13.4537	2.1489	1.817e-07	1.2964e-05
Cluster-34894.98322	27.6587	4.35245	2.1489	7.8049e-05	0.0021533
Cluster-19351.0	24.9934	3.71198	2.1487	0.00016145	0.0038825
Cluster-16827.0	19.2379	2.60469	2.1463	0.00029484	0.0063013
Cluster-34894.18076	58.215	11.2189	2.1461	1.4595e-07	1.0808e-05
Cluster-34894.53995	3489.3	752.429	2.1457	1.6766e-19	2.4294e-16
Cluster-34894.35116	33.0315	5.52392	2.1457	2.7215e-05	0.00090995
Cluster-34894.97561	42.951	7.68692	2.1456	3.5212e-06	0.00016242
Cluster-34894.99799	26.6941	4.31596	2.1453	5.7115e-05	0.0016651
Cluster-34894.96991	17.2102	2.2662	2.1439	0.00034287	0.007111
Cluster-34894.12704	45.408	8.56521	2.143	6.9979e-07	4.1258e-05
Cluster-32127.1	20.1965	2.72673	2.143	0.00035382	0.0072979
Cluster-34894.96734	17.8525	2.25992	2.1422	0.00043685	0.008643
Cluster-34894.10101	65.1507	12.6434	2.14	7.6565e-08	6.1342e-06
Cluster-34894.13731	23.2008	3.63899	2.1387	9.156e-05	0.0024576
Cluster-34894.44965	2291.27	487.015	2.1378	3.1528e-14	1.3892e-11
Cluster-34894.88991	54.8482	10.5533	2.1375	2.972e-07	1.9773e-05
Cluster-34894.72212	582.99	126.414	2.1372	3.5331e-19	4.9298e-16
Cluster-34894.45004	2142.55	460.181	2.1361	3.4492e-16	2.4338e-13
Cluster-29870.0	65.6028	9.41331	2.1346	0.00025051	0.0055182
Cluster-34894.34275	148.023	31.353	2.1341	6.7546e-13	2.2322e-10
Cluster-34894.73823	131.51	27.3804	2.1338	2.7963e-11	6.0285e-09
Cluster-34894.83302	22.6431	3.36721	2.1324	0.0001991	0.0045994
Cluster-34894.96654	145.714	29.5034	2.1311	3.466e-09	4.0901e-07
Cluster-34894.27339	46.0985	8.78165	2.1282	6.5703e-07	3.9104e-05
Cluster-34894.102713	29.5193	4.99293	2.1264	4.142e-05	0.0012798
Cluster-34894.100972	221.832	47.9059	2.1254	2.6137e-15	1.4807e-12
Cluster-34894.30269	113.616	23.8372	2.1254	2.3515e-11	5.1209e-09
Cluster-34894.99970	204.488	42.6336	2.1236	5.168e-11	1.0247e-08
Cluster-34894.14994	32.4059	5.65853	2.1236	2.2881e-05	0.00078831
Cluster-34894.90581	45.1675	8.39782	2.1223	4.6994e-06	0.00020792
Cluster-34894.22823	452.613	99.3094	2.1189	2.0148e-18	2.2828e-15
Cluster-34894.56367	5785.01	1242.25	2.1183	2.3703e-13	8.7331e-11
Cluster-34894.17125	134.837	28.3985	2.1172	1.8111e-11	4.0794e-09
Cluster-34894.80154	504.882	112.757	2.1171	3.7926e-26	1.2701e-22
Cluster-34894.40899	37.0822	6.86021	2.1171	4.3392e-06	0.00019363
Cluster-34894.29908	720.548	153.899	2.1166	1.9788e-12	5.7679e-10
Cluster-19321.0	31.5508	5.3377	2.1153	5.552e-05	0.0016271
Cluster-34894.97671	180.96	38.826	2.1151	2.0509e-12	5.955e-10
Cluster-34894.15708	31.0104	5.23449	2.1143	5.0542e-05	0.0015037
Cluster-26628.0	137.293	29.2063	2.1131	1.0966e-11	2.5942e-09
Cluster-34894.60277	492.018	109.078	2.1126	1.0936e-19	1.6317e-16
Cluster-34894.19062	138.139	29.7221	2.1117	1.9158e-12	5.6059e-10
Cluster-34894.72931	278.851	61.0777	2.1097	2.329e-16	1.7289e-13
Cluster-34894.99559	137.754	27.5793	2.1088	1.7324e-07	1.2462e-05
Cluster-34894.57202	530.19	116.078	2.1054	8.411e-15	4.3112e-12
Cluster-34894.100203	32.3926	5.57926	2.1045	4.4121e-05	0.0013459
Cluster-25930.0	29.1234	4.93878	2.103	6.0819e-05	0.0017501
Cluster-34894.84690	27.0639	4.40151	2.1016	0.00013787	0.0034273
Cluster-34894.95614	161.698	33.1563	2.1013	2.4093e-08	2.2706e-06
Cluster-34894.11897	45.3422	8.81814	2.0948	1.3882e-06	7.442e-05
Cluster-34894.65933	29.6099	5.26471	2.0944	3.0516e-05	0.0009947
Cluster-34894.99888	266.86	54.9249	2.0941	2.8278e-08	2.6111e-06
Cluster-34894.20158	270.419	57.5621	2.0916	3.5571e-10	5.5837e-08
Cluster-34894.97308	105.167	22.5272	2.0904	1.1827e-10	2.1264e-08
Cluster-34894.96657	495.097	110.419	2.0892	1.2766e-16	1.002e-13
Cluster-34894.82993	1348.31	296.519	2.0875	2.4742e-13	9.0279e-11
Cluster-34894.105835	42.9072	8.30599	2.0873	3.7589e-06	0.00017202
Cluster-34894.48340	203.368	43.356	2.0869	1.023e-09	1.4053e-07
Cluster-34894.16594	189.188	41.7627	2.0861	2.0013e-13	7.5019e-11
Cluster-34894.33579	247.985	55.5147	2.0858	4.9791e-16	3.3496e-13
Cluster-34894.25556	335.555	70.3351	2.0841	1.3481e-08	1.3689e-06
Cluster-34894.99813	41.5791	7.26916	2.0834	4.6109e-05	0.0013925
Cluster-34894.29907	172.274	37.8584	2.0822	1.0952e-12	3.4171e-10
Cluster-34894.76194	766.169	174.313	2.0798	5.4585e-21	9.3474e-18
Cluster-34894.14404	136.396	29.2905	2.0782	1.6594e-09	2.152e-07
Cluster-34894.15622	76.9566	14.2226	2.0782	1.5939e-05	0.00058185
Cluster-34894.93796	38.8943	7.49441	2.0778	4.267e-06	0.00019098
Cluster-34894.44127	107.381	23.0809	2.077	5.1234e-10	7.6822e-08
Cluster-34894.82382	687.72	151.622	2.0759	4.5325e-12	1.1858e-09
Cluster-34894.26831	83.8199	17.05	2.0754	3.2175e-07	2.1164e-05
Cluster-34894.103267	25.0352	4.27318	2.0739	0.00010113	0.002661
Cluster-34894.92412	37.6962	7.28425	2.0728	6.575e-06	0.00027698
Cluster-34894.15725	93.4328	19.9918	2.0723	6.6855e-09	7.2584e-07
Cluster-34894.14399	76.2157	16.1691	2.072	1.4139e-08	1.4242e-06
Cluster-34894.39409	233.678	52.7629	2.0708	2.0539e-16	1.5475e-13
Cluster-34894.29410	38.6872	7.20498	2.0707	2.0169e-05	0.00070913
Cluster-34894.90647	107.156	22.3461	2.0703	3.3791e-08	3.0292e-06
Cluster-34894.19203	748.017	165.405	2.0702	5.8666e-12	1.4933e-09
Cluster-34894.88008	425.225	96.4548	2.0683	1.1014e-16	8.6894e-14
Cluster-34894.102414	43.2705	8.04306	2.0679	1.7657e-05	0.00063361
Cluster-34894.23112	125.517	27.4913	2.0675	1.8839e-10	3.1863e-08
Cluster-34894.8460	72.4045	14.9221	2.0674	1.7532e-07	1.2579e-05
Cluster-34894.90004	57.2324	11.8959	2.0671	1.653e-07	1.1987e-05
Cluster-34894.96811	51.1644	10.4564	2.0669	4.2239e-07	2.6697e-05
Cluster-34894.99239	376.719	84.1243	2.0668	7.1961e-13	2.3574e-10
Cluster-34894.60353	194.324	43.761	2.0661	3.0786e-14	1.3605e-11
Cluster-34894.9961	34.8254	6.58844	2.0647	1.5166e-05	0.00055877
Cluster-34894.99084	24.7964	4.27946	2.0647	0.0001078	0.0028042
Cluster-34894.64571	1546.37	346.319	2.0635	5.3128e-13	1.7951e-10
Cluster-34894.89540	34.3911	6.26879	2.0634	4.3281e-05	0.0013259
Cluster-34894.88458	246.29	55.4821	2.0616	5.3782e-14	2.2707e-11
Cluster-34894.35048	102.652	22.005	2.0609	4.6697e-09	5.3189e-07
Cluster-34894.56038	10830.9	2346.05	2.0585	2.9519e-09	3.5474e-07
Cluster-34894.44343	310.234	61.8552	2.0582	3.0752e-06	0.00014513
Cluster-34894.18803	36.3118	6.89043	2.0569	1.7616e-05	0.00063264
Cluster-34894.72073	629.434	146.448	2.055	9.994e-23	2.1212e-19
Cluster-34894.27127	181.775	38.8248	2.0537	1.9346e-08	1.8845e-06
Cluster-34894.58093	4553.8	1013.86	2.0519	4.421e-11	9.0151e-09
Cluster-17055.1	80.898	17.4438	2.0517	1.4723e-08	1.4775e-06
Cluster-34894.95734	162.109	33.3373	2.0515	6.0575e-07	3.6501e-05
Cluster-34894.25512	57.4946	11.7915	2.0514	9.2452e-07	5.2317e-05
Cluster-34894.84004	86.3968	16.2346	2.0514	3.0307e-05	0.0009892
Cluster-34894.32276	61.8358	12.6761	2.0509	1.3732e-06	7.3905e-05
Cluster-34894.51294	69.078	14.2955	2.0498	7.668e-07	4.4477e-05
Cluster-34894.35111	483.218	111.943	2.0496	5.1525e-19	6.6936e-16
Cluster-34894.43857	25.5822	4.50218	2.0466	9.6725e-05	0.002568
Cluster-34894.14414	82.8644	17.9118	2.0464	2.8159e-08	2.6017e-06
Cluster-34894.10618	100.681	21.7081	2.0459	3.9983e-08	3.4868e-06
Cluster-34894.39772	40.2602	7.72594	2.0456	2.4317e-05	0.00083056
Cluster-34894.84689	119.652	26.228	2.0428	5.8744e-09	6.5091e-07
Cluster-34894.92844	790.551	185.678	2.0425	3.5851e-23	7.945e-20
Cluster-34894.37205	188.136	42.5493	2.0413	4.551e-12	1.1886e-09
Cluster-34894.50285	117.124	26.36	2.0411	3.8825e-11	8.07e-09
Cluster-34894.93413	88.1648	18.6606	2.0404	1.312e-07	9.8216e-06
Cluster-34894.41361	2013.38	461.378	2.0402	5.3793e-14	2.2707e-11
Cluster-34894.32909	39.2223	7.84546	2.0401	5.3499e-06	0.00023227
Cluster-34894.12685	23.1438	3.89192	2.0399	0.00022016	0.0049837
Cluster-34894.13664	28.8669	5.17288	2.0397	8.5509e-05	0.0023193
Cluster-34894.101478	55.3781	11.1813	2.0388	4.2327e-06	0.00018995
Cluster-34894.22778	36.9916	7.04269	2.0388	3.6957e-05	0.0011653
Cluster-34894.31147	428.624	100.689	2.0385	4.412e-21	7.6421e-18
Cluster-34894.15556	228.706	49.8097	2.0374	1.0007e-08	1.0494e-06
Cluster-34894.76305	2554.66	558.767	2.0372	1.0366e-08	1.0847e-06
Cluster-34894.100797	233.334	51.0513	2.0367	1.6326e-08	1.6185e-06
Cluster-34894.12702	18.6579	2.91924	2.0359	0.0004496	0.00883
Cluster-34894.90950	29.8541	5.55414	2.0353	5.2415e-05	0.0015524
Cluster-34894.75871	132.765	29.5801	2.0349	7.4626e-10	1.0715e-07
Cluster-34894.60834	35759.8	8301.15	2.0328	1.6446e-15	9.8068e-13
Cluster-34894.83423	58.0519	12.0142	2.0319	1.3871e-06	7.4388e-05
Cluster-34894.17576	45.0722	9.29752	2.0297	3.0239e-06	0.00014303
Cluster-34894.71030	33.057	6.17696	2.0295	5.0625e-05	0.0015053
Cluster-34894.8253	26.4552	4.51474	2.0294	0.00020942	0.0047837
Cluster-34894.71832	442.195	101.586	2.028	3.9153e-13	1.3626e-10
Cluster-34894.89673	24.3608	4.25553	2.0278	0.00017797	0.0042095
Cluster-34894.10156	266.124	59.8444	2.0271	8.0327e-10	1.143e-07
Cluster-34894.82667	440.471	102.542	2.0261	1.0135e-14	5.057e-12
Cluster-34894.14461	31.2732	5.91775	2.0261	4.6868e-05	0.0014114
Cluster-34894.84154	186.283	42.7607	2.0227	1.4407e-11	3.3349e-09
Cluster-16269.0	23.1375	4.02653	2.0225	0.00023432	0.0052377
Cluster-34894.38619	36.5138	7.19242	2.0224	1.703e-05	0.00061527
Cluster-34894.52154	455.691	107.706	2.022	1.7528e-18	2.0319e-15
Cluster-34894.15652	29.5763	5.0269	2.02	0.00023923	0.0053242
Cluster-17208.0	90.5353	15.5148	2.02	0.00026275	0.0057435
Cluster-34894.75560	668.004	150.691	2.0194	8.0497e-10	1.1444e-07
Cluster-34894.8991	30.657	5.91775	2.0149	4.1717e-05	0.0012874
Cluster-34894.98549	75.8072	16.5718	2.0143	7.8446e-08	6.2647e-06
Cluster-34894.97937	56.9187	11.9991	2.0141	2.1676e-06	0.00010874
Cluster-34894.12137	58.131	11.37	2.0136	3.648e-05	0.0011532
Cluster-34894.69856	60.4944	12.9177	2.0135	1.0592e-06	5.8922e-05
Cluster-34894.98790	21.2149	3.566	2.0133	0.00034066	0.007073
Cluster-34894.92690	254.616	57.7164	2.0122	1.0431e-09	1.4315e-07
Cluster-34894.100327	623.464	139.614	2.0115	6.4198e-09	7.0154e-07
Cluster-34894.30583	149.082	33.672	2.0104	9.0359e-10	1.2667e-07
Cluster-34894.59492	117.946	26.8118	2.0091	7.6533e-10	1.0953e-07
Cluster-34894.6068	41.7428	8.58914	2.0086	7.6623e-06	0.00031514
Cluster-20810.0	53.2198	10.7382	2.0081	1.9513e-05	0.00068994
Cluster-34894.5550	48.4362	10.2149	2.0073	2.391e-06	0.00011767
Cluster-34894.14094	99.3822	22.1159	2.0065	3.9691e-08	3.4694e-06
Cluster-34894.14205	63.8279	13.7985	2.0063	4.959e-07	3.0689e-05
Cluster-34894.99683	126.942	27.724	2.0061	1.2424e-07	9.3751e-06
Cluster-34894.97625	469.286	108.94	2.0057	1.8677e-11	4.1821e-09
Cluster-34894.53806	46.9457	9.8701	2.0045	3.2281e-06	0.00015099
Cluster-34894.98323	117.568	26.6118	2.0041	4.8852e-09	5.531e-07
Cluster-34894.98040	199.697	46.475	2.0036	2.2261e-11	4.8972e-09
Cluster-34894.45303	60.3062	12.047	2.0035	2.9291e-05	0.00096124
Cluster-34894.33840	97.0224	22.2429	2.0028	4.8503e-10	7.3483e-08
Cluster-15355.1	28.0436	5.27099	2.0016	0.00010015	0.0026402
Cluster-34648.0	29.9335	5.86869	2.0002	3.9576e-05	0.0012327
Cluster-34894.63287	237.662	56.3163	1.9991	5.2961e-14	2.2522e-11
Cluster-34894.95541	110.335	24.8677	1.9989	2.2939e-08	2.1754e-06
Cluster-34894.73562	106.017	23.8295	1.9976	3.2815e-08	2.9593e-06
Cluster-34894.60924	136.937	31.7796	1.9966	1.1865e-10	2.1285e-08
Cluster-12597.1	58.7346	12.6371	1.9965	8.8112e-07	5.0126e-05
Cluster-34894.102519	42.5491	8.71119	1.9964	1.8584e-05	0.00066158
Cluster-34894.23460	81.5995	16.6348	1.9955	1.4331e-05	0.00053139
Cluster-34894.98327	996.528	240.635	1.9954	4.6177e-19	6.0798e-16
Cluster-34894.62499	390.868	90.1332	1.9953	7.4268e-10	1.0679e-07
Cluster-34894.49674	161.212	36.7258	1.9951	8.6988e-09	9.2705e-07
Cluster-34894.20216	28.8697	5.1666	1.9945	0.00022614	0.005094
Cluster-34894.70554	77.5636	17.5482	1.994	2.8444e-08	2.6202e-06
Cluster-34894.93019	45.0417	9.50768	1.9939	3.873e-06	0.00017627
Cluster-34894.96635	1083.6	257.104	1.9934	1.9453e-13	7.3469e-11
Cluster-34894.72901	429.318	103.707	1.9933	1.708e-18	1.9952e-15
Cluster-29366.0	58.6354	12.3853	1.993	3.8273e-06	0.00017462
Cluster-34894.78658	242.941	55.861	1.9903	2.7919e-09	3.3739e-07
Cluster-34894.27222	42.1007	8.42176	1.9903	4.4108e-05	0.0013459
Cluster-34894.43248	1177.77	287.485	1.9892	2.5297e-22	5.1275e-19
Cluster-34894.25547	52.3172	11.3284	1.9872	2.2927e-06	0.00011388
Cluster-34894.102496	65.2828	14.0452	1.9868	2.1895e-06	0.0001098
Cluster-34894.26768	35.2987	7.19242	1.9862	2.1376e-05	0.00074584
Cluster-34894.15710	177.538	40.6658	1.9848	1.1224e-08	1.1641e-06
Cluster-34894.36087	66.8998	15.1109	1.984	6.0267e-08	4.9709e-06
Cluster-34894.12830	100.447	22.7966	1.9833	2.7775e-08	2.5679e-06
Cluster-34894.8029	25.771	4.64188	1.9833	0.00029286	0.0062723
Cluster-34894.81368	40.1818	7.69201	1.983	9.912e-05	0.0026177
Cluster-34894.24253	73.3556	14.4139	1.9824	7.1345e-05	0.0019958
Cluster-34894.15650	74.6349	15.886	1.9809	3.3132e-06	0.00015448
Cluster-34894.15344	90.094	20.5367	1.9808	1.9583e-08	1.9039e-06
Cluster-34894.94217	28.2629	5.57298	1.9808	6.4485e-05	0.001838
Cluster-34894.70714	133.642	30.8761	1.9807	6.6401e-09	7.2299e-07
Cluster-34894.88627	209.87	47.5486	1.9796	4.5925e-08	3.9344e-06
Cluster-34894.8401	31.3437	6.01586	1.977	0.00014156	0.0035004
Cluster-23495.0	43.3595	9.08992	1.9767	1.0344e-05	0.00040343
Cluster-34894.83331	1192.31	275.762	1.9761	6.4196e-09	7.0154e-07
Cluster-34894.92222	39.2902	8.15373	1.9757	1.7372e-05	0.00062509
Cluster-34894.6863	30.1528	5.27608	1.9747	0.00046767	0.00911
Cluster-34894.37487	36.7964	7.33587	1.9743	4.5855e-05	0.0013864
Cluster-34894.69293	58.9901	12.8925	1.9728	2.3154e-06	0.00011482
Cluster-34894.109466	66.153	14.8768	1.9727	3.0924e-07	2.0484e-05
Cluster-34894.12610	90.8452	21.084	1.9726	6.52e-09	7.117e-07
Cluster-34894.104191	90.3581	20.5543	1.9714	7.4201e-08	5.9604e-06
Cluster-34894.55056	166.338	37.5389	1.9713	2.3107e-07	1.5988e-05
Cluster-34894.74316	53.6658	11.5637	1.9708	5.9057e-06	0.00025254
Cluster-34894.15723	54.9643	12.0821	1.9707	1.375e-06	7.3975e-05
Cluster-34894.7569	18.9572	3.264	1.97	0.00051873	0.0099023
Cluster-34894.55639	12809.1	3074.91	1.9642	1.2402e-11	2.911e-09
Cluster-34894.63685	506.499	124.062	1.9631	1.2137e-15	7.4763e-13
Cluster-34894.18883	102.291	23.3176	1.9628	1.557e-07	1.1418e-05
Cluster-34894.72209	762.961	185.31	1.9625	1.7384e-13	6.6151e-11
Cluster-34894.15921	129.254	30.8371	1.9621	1.4104e-10	2.4688e-08
Cluster-34894.65178	74.2459	16.9467	1.962	1.3711e-07	1.0239e-05
Cluster-34894.13879	76.5418	17.026	1.962	1.0974e-06	6.0656e-05
Cluster-34894.20154	30.2117	5.94168	1.9619	0.00011937	0.0030392
Cluster-34894.33859	2796.07	656.821	1.9615	3.787e-09	4.4308e-07
Cluster-34894.99031	236.093	57.0887	1.9609	1.7049e-12	5.0474e-10
Cluster-34894.14775	86.0352	19.6042	1.9609	2.6618e-07	1.8011e-05
Cluster-34894.29363	54.2918	11.4542	1.9594	1.7525e-05	0.00062999
Cluster-34894.11933	34.1985	7.01876	1.9594	5.8131e-05	0.0016875
Cluster-34894.57008	899.755	222.904	1.9592	1.9078e-18	2.178e-15
Cluster-34894.21677	111.894	26.3928	1.9592	1.6788e-09	2.1715e-07
Cluster-34894.20696	191.923	46.0486	1.9591	3.0109e-11	6.4634e-09
Cluster-34894.99221	348.641	86.0675	1.9589	5.9565e-17	4.9592e-14
Cluster-34894.103707	33.8954	6.84137	1.9584	6.351e-05	0.001815
Cluster-34894.83989	67.1513	15.3185	1.9573	4.3605e-07	2.7448e-05
Cluster-34894.83947	776.898	193.905	1.9567	7.3506e-22	1.3508e-18
Cluster-34894.81578	193.222	46.5543	1.9558	8.2318e-11	1.5448e-08
Cluster-34894.101008	54.2914	12.2344	1.9558	1.0173e-06	5.6903e-05
Cluster-34894.66305	124.592	28.7585	1.9553	1.0965e-07	8.4175e-06
Cluster-34894.49677	726.783	167.707	1.9552	7.9601e-08	6.3401e-06
Cluster-34894.64313	93.1911	21.1986	1.9548	2.2677e-07	1.5733e-05
Cluster-34894.101123	189.879	46.3304	1.9547	5.9013e-13	1.9718e-10
Cluster-34894.72501	52.1693	11.4468	1.9521	4.7257e-06	0.00020877
Cluster-34894.10920	118.029	28.1959	1.9512	6.6717e-10	9.7233e-08
Cluster-34894.61150	911.107	218.56	1.9506	4.0252e-10	6.2468e-08
Cluster-34894.29695	96.681	22.4165	1.9506	1.7163e-07	1.2381e-05
Cluster-34894.51931	306.219	73.4213	1.9504	7.3501e-10	1.0589e-07
Cluster-34894.81972	178.055	43.5509	1.9503	1.7338e-12	5.1231e-10
Cluster-34894.26969	36.4248	7.52581	1.9498	5.0133e-05	0.0014936
Cluster-34894.12912	45.3935	9.03321	1.9492	0.000139	0.0034503
Cluster-34894.30407	985.689	243.842	1.9486	2.5744e-15	1.4639e-12
Cluster-34894.16710	37.9017	7.63411	1.9477	0.00011147	0.0028818
Cluster-34894.16000	60.9948	13.9394	1.9474	7.2162e-07	4.2296e-05
Cluster-34894.41687	186.838	44.7624	1.9472	4.7919e-10	7.2794e-08
Cluster-34894.47996	33.8155	6.87787	1.9472	8.3201e-05	0.0022673
Cluster-34894.52457	165.51	40.2553	1.9465	1.1518e-11	2.7163e-09
Cluster-34894.101653	148.9	35.7947	1.9455	1.6055e-10	2.7809e-08
Cluster-34894.15350	83.3153	19.7288	1.9454	1.2333e-08	1.2721e-06
Cluster-34894.20899	25.1608	4.92622	1.9448	0.00017753	0.0042018
Cluster-34894.80345	248.851	61.3205	1.9432	1.1416e-13	4.4917e-11
Cluster-34894.92197	434.297	97.4305	1.9432	2.6241e-06	0.0001267
Cluster-34894.55962	669.959	169.378	1.9428	3.285e-23	7.5005e-20
Cluster-34894.83955	250.994	60.8235	1.9421	2.9285e-10	4.6947e-08
Cluster-34894.40392	92.2092	21.8428	1.942	8.1915e-09	8.774e-07
Cluster-34894.102415	227.267	55.7074	1.9414	5.2462e-12	1.3514e-09
Cluster-34894.59916	1809.95	449.94	1.9412	8.7655e-15	4.4625e-12
Cluster-34894.96652	53.3879	12.0519	1.941	1.4985e-06	7.9179e-05
Cluster-34894.61252	294.704	72.8264	1.9409	5.4607e-13	1.8409e-10
Cluster-34894.32808	236.981	56.9507	1.9409	1.1596e-09	1.5687e-07
Cluster-34894.16508	21.2379	3.94726	1.9406	0.00039866	0.0080145
Cluster-34894.99975	95.5235	22.7739	1.94	3.3916e-09	4.0149e-07
Cluster-34894.90421	28.6941	5.87497	1.9391	8.0114e-05	0.0021966
Cluster-34894.20320	24.1833	4.53868	1.9384	0.00035576	0.0073298
Cluster-34894.71837	148.817	34.8952	1.9377	7.3675e-08	5.9276e-06
Cluster-34894.36614	132.269	29.6103	1.9375	5.058e-06	0.00022138
Cluster-34894.53949	21888.7	5333.64	1.9366	1.0772e-10	1.9558e-08
Cluster-34894.81805	238.852	59.3474	1.9358	3.2059e-14	1.4085e-11
Cluster-34894.15651	40.1151	8.28462	1.9351	6.4609e-05	0.0018401
Cluster-34894.13380	41.7025	8.76652	1.9348	6.5167e-05	0.0018539
Cluster-34894.16562	127.742	30.6169	1.9339	4.1937e-09	4.85e-07
Cluster-34894.71841	1268.28	309.355	1.9322	1.6729e-10	2.8732e-08
Cluster-34894.97614	369.962	91.5346	1.9316	8.3166e-13	2.6665e-10
Cluster-34894.47768	173.301	42.2448	1.9302	2.185e-10	3.6105e-08
Cluster-34894.46536	52.1114	11.8896	1.9302	2.3008e-06	0.00011416
Cluster-34894.102605	102.876	24.0673	1.9281	4.8486e-07	3.0105e-05
Cluster-34894.16777	201.714	50.2335	1.928	1.7015e-12	5.0472e-10
Cluster-34894.17314	22.2723	4.27946	1.9273	0.00034921	0.0072166
Cluster-34894.69812	128.973	31.6399	1.9266	1.068e-10	1.9437e-08
Cluster-34894.9057	250.526	62.5197	1.926	2.9231e-13	1.0438e-10
Cluster-34894.43877	40.7269	8.95903	1.9238	1.9974e-05	0.00070342
Cluster-34894.97620	38.6671	8.44944	1.9234	1.7622e-05	0.00063264
Cluster-34894.93780	697.169	176.515	1.9228	7.6233e-16	4.8884e-13
Cluster-12834.0	63.7719	14.9096	1.9228	2.8887e-07	1.9321e-05
Cluster-34894.9122	33.9096	7.16849	1.921	5.8245e-05	0.0016905
Cluster-34894.24583	149.293	37.0303	1.9196	9.0929e-11	1.6792e-08
Cluster-34894.30267	121.197	29.5938	1.9196	1.7992e-09	2.3095e-07
Cluster-34894.15712	86.4842	20.9921	1.9193	5.7781e-09	6.426e-07
Cluster-34894.50810	159.742	39.0601	1.919	2.1866e-09	2.7458e-07
Cluster-34894.52776	797.539	197.345	1.9188	9.0046e-11	1.667e-08
Cluster-34894.15474	29.7116	5.88634	1.9186	0.00026257	0.0057403
Cluster-34894.13647	41.0665	8.69234	1.9169	8.75e-05	0.0023664
Cluster-34894.46607	103.937	24.991	1.9168	7.1643e-08	5.7888e-06
Cluster-34894.6752	36.6073	7.2301	1.9167	0.00030236	0.0064236
Cluster-34894.89204	44.0777	9.88894	1.9162	1.0086e-05	0.0003957
Cluster-34894.29915	531.661	134.318	1.9156	5.6881e-14	2.381e-11
Cluster-34894.12629	71.6734	17.1795	1.9153	9.4506e-08	7.3524e-06
Cluster-34894.15250	58.4973	13.0699	1.9152	1.7234e-05	0.00062129
Cluster-34894.56041	3755.92	904.051	1.9149	4.0783e-08	3.5525e-06
Cluster-34894.1162	63.3628	14.0665	1.9146	2.1765e-05	0.00075606
Cluster-34894.16475	35.6827	7.59762	1.9143	7.1371e-05	0.0019961
Cluster-34894.72211	1652.55	409.253	1.9142	1.8129e-10	3.0764e-08
Cluster-34894.24606	27.3452	5.41444	1.9142	0.00023461	0.0052431
Cluster-34894.14217	25.2071	4.90738	1.9141	0.00035321	0.0072884
Cluster-34894.23317	330.482	82.9503	1.9137	3.8436e-12	1.0306e-09
Cluster-13705.0	24.7599	4.97528	1.9131	0.00025064	0.0055195
Cluster-34894.54443	129.724	30.5804	1.9114	7.0306e-07	4.1402e-05
Cluster-34894.50907	187.984	46.9156	1.911	1.3606e-11	3.1739e-09
Cluster-34894.63056	502.221	127.99	1.9109	3.5078e-15	1.9506e-12
Cluster-34894.2488	23.5998	4.66072	1.9101	0.00034505	0.0071513
Cluster-34894.30332	66.6267	13.7281	1.9098	0.00014984	0.0036633
Cluster-34894.18447	148.683	34.2684	1.9093	2.5161e-06	0.00012267
Cluster-34894.56255	226.473	50.9108	1.9093	1.1575e-05	0.00044358
Cluster-34894.73942	236.799	59.4618	1.9089	4.6141e-12	1.203e-09
Cluster-34894.55961	35.2443	7.57368	1.9089	6.1513e-05	0.001767
Cluster-34894.78552	44.5328	9.48255	1.9089	7.3535e-05	0.0020464
Cluster-34894.102588	29.5432	6.17068	1.9088	0.00010806	0.0028105
Cluster-34894.13640	130.996	32.7597	1.9085	4.1641e-11	8.5842e-09
Cluster-34894.13846	82.6668	19.2041	1.9079	2.5002e-06	0.00012201
Cluster-34894.17380	93.5143	22.9136	1.9066	5.9737e-09	6.5901e-07
Cluster-34894.14032	44.2951	10.0689	1.9063	6.7556e-06	0.00028337
Cluster-34894.10112	78.9474	16.0949	1.9061	0.00023495	0.0052485
Cluster-17437.0	72.8458	16.9707	1.906	1.6742e-06	8.7361e-05
Cluster-34894.29912	405.173	100.658	1.9058	4.3322e-10	6.6346e-08
Cluster-34894.68496	1530.13	388.671	1.9054	1.968e-13	7.3956e-11
Cluster-34894.5333	34.6919	7.33587	1.9054	7.9065e-05	0.0021754
Cluster-34894.20371	27.7481	5.66481	1.9054	0.0002352	0.0052523
Cluster-34894.64041	1192.91	307.494	1.9053	3.3831e-18	3.6677e-15
Cluster-34894.96990	231.814	58.2982	1.9051	7.5701e-12	1.861e-09
Cluster-34894.1073	86.5859	20.1931	1.9048	3.3317e-06	0.00015497
Cluster-34894.74616	1012.1	258.905	1.9044	9.2522e-15	4.6321e-12
Cluster-34894.15337	61.5151	14.4453	1.904	1.2934e-06	7.0085e-05
Cluster-34894.104206	32.4273	6.6589	1.9036	0.00015533	0.0037675
Cluster-34894.102127	42.1268	9.31636	1.9034	3.6804e-05	0.0011612
Cluster-34894.81833	199.523	50.6124	1.9028	5.7424e-13	1.9273e-10
Cluster-34894.83148	1268.21	313.322	1.9023	3.532e-09	4.155e-07
Cluster-34894.11547	45.3448	9.93799	1.9013	4.7234e-05	0.0014198
Cluster-34894.14905	60.3487	13.7859	1.9012	8.9892e-06	0.00035903
Cluster-34894.72787	339.635	85.665	1.901	2.2629e-11	4.9637e-09
Cluster-34894.86946	67.0292	15.9162	1.9009	1.0782e-06	5.9778e-05
Cluster-28619.2	52.3377	11.6593	1.8969	2.7398e-05	0.00091465
Cluster-34894.10499	32.6605	6.43243	1.8968	0.0005001	0.009604
Cluster-34894.15887	38.5837	8.36642	1.8959	9.1006e-05	0.0024454
Cluster-34894.6504	322.47	82.2788	1.8931	1.0932e-12	3.4171e-10
Cluster-34894.5349	24.8143	4.99921	1.8922	0.0003888	0.0078624
Cluster-34894.72142	546.969	141.415	1.892	4.1736e-15	2.2787e-12
Cluster-34894.103973	39.3176	8.73003	1.8919	5.5419e-05	0.0016257
Cluster-34894.73975	466.904	120.219	1.8909	1.0002e-13	3.9665e-11
Cluster-34894.71244	500.489	122.618	1.8904	6.1566e-08	5.0587e-06
Cluster-34894.87619	37.5357	8.34249	1.8896	5.5272e-05	0.001622
Cluster-34894.14773	56.835	13.4361	1.8891	1.9864e-06	0.00010093
Cluster-34894.54220	370.014	96.0796	1.8888	1.7792e-15	1.0535e-12
Cluster-34894.103684	40.557	9.28495	1.8884	1.8091e-05	0.0006474
Cluster-34894.91000	389.95	101.426	1.888	4.738e-16	3.2017e-13
Cluster-34894.68364	74.2421	18.1282	1.8863	2.1835e-07	1.5226e-05
Cluster-35240.7	38.8264	8.13489	1.8856	0.00018846	0.0044064
Cluster-34894.42550	1401.43	365.379	1.8849	3.6537e-16	2.549e-13
Cluster-34894.75752	51.3051	11.7474	1.8847	2.429e-05	0.00082984
Cluster-34894.16987	839.171	218.44	1.8839	1.6317e-15	9.7965e-13
Cluster-34894.41203	43.734	9.407	1.8833	0.00016278	0.0039097
Cluster-34894.101634	165.347	42.3164	1.8828	1.6802e-11	3.8017e-09
Cluster-34894.19108	113.503	28.3293	1.8822	1.4076e-08	1.4217e-06
Cluster-34894.54946	439.848	115.457	1.8814	1.2791e-18	1.5298e-15
Cluster-34894.82431	43.1121	9.98077	1.88	1.7229e-05	0.00062126
Cluster-34894.2315	27.3515	5.63341	1.8793	0.00035278	0.0072804
Cluster-34894.26193	27.4718	5.87497	1.8785	0.00015154	0.0036951
Cluster-34894.29511	78.8467	19.2557	1.8777	2.8422e-07	1.9061e-05
Cluster-34894.17406	143.456	36.4138	1.8771	1.6956e-09	2.1914e-07
Cluster-34894.88007	33.8589	7.53719	1.8768	6.5375e-05	0.0018577
Cluster-34894.13550	37.981	8.45572	1.8763	5.8555e-05	0.0016975
Cluster-34894.19751	126.567	31.8802	1.8755	3.0564e-09	3.6553e-07
Cluster-22875.0	38.9267	8.66332	1.8741	8.7604e-05	0.0023688
Cluster-34894.71862	56.7503	13.5519	1.874	3.8107e-06	0.00017391
Cluster-34894.11833	22.6582	4.59402	1.873	0.00045883	0.0089725
Cluster-34894.22644	28.7895	5.80707	1.8723	0.00045438	0.0089012
Cluster-34894.83422	85.4148	20.9493	1.871	4.16e-07	2.6362e-05
Cluster-34894.24604	131.352	32.8378	1.8707	3.8378e-08	3.3702e-06
Cluster-34894.48702	1407.64	359.261	1.8704	6.8071e-10	9.8919e-08
Cluster-34894.15356	76.0099	18.6429	1.8694	8.3543e-07	4.8015e-05
Cluster-34894.7647	146.463	35.2625	1.8693	3.0878e-06	0.00014555
Cluster-34894.33977	396.888	103.242	1.8676	5.8006e-12	1.479e-09
Cluster-34894.1076	40.4868	9.24218	1.8672	4.6085e-05	0.001392
Cluster-34894.45714	99.2938	22.702	1.8671	4.1316e-05	0.0012771
Cluster-34894.14347	22.6661	4.59402	1.8661	0.00050427	0.0096656
Cluster-34894.15240	189.456	49.3326	1.8656	1.2992e-11	3.0353e-09
Cluster-34894.44216	203.676	53.1529	1.8655	1.3674e-12	4.1473e-10
Cluster-34894.103705	105.999	27.12	1.8653	9.0981e-10	1.2718e-07
Cluster-34894.91755	56.1517	13.6009	1.8652	2.6539e-06	0.00012794
Cluster-34894.8591	254.72	66.5411	1.8641	4.0975e-12	1.0871e-09
Cluster-34894.36279	61.2941	14.9033	1.8639	1.0323e-06	5.7615e-05
Cluster-34894.49717	104.535	25.4642	1.8638	1.6865e-06	8.7939e-05
Cluster-34894.12139	82.865	20.1012	1.8637	3.0191e-06	0.00014284
Cluster-34894.108031	130.75	33.526	1.8633	2.6991e-09	3.2933e-07
Cluster-34894.32507	64.4542	15.54	1.8629	3.7064e-06	0.00016997
Cluster-34894.22918	36.472	8.08955	1.8629	0.00014063	0.0034826
Cluster-34894.99673	82.032	20.29	1.8623	3.5739e-07	2.3124e-05
Cluster-34894.38628	5573.89	1462.92	1.8609	4.2125e-13	1.4526e-10
Cluster-34894.60354	31.7528	6.99482	1.8606	0.0001621	0.0038948
Cluster-34894.25037	128.675	33.1259	1.86	1.7477e-09	2.251e-07
Cluster-34894.55389	228.815	58.849	1.8595	5.2646e-10	7.8549e-08
Cluster-34894.104659	291.1	71.5457	1.8594	7.5333e-07	4.3817e-05
Cluster-34894.71203	271.951	71.6222	1.8593	4.5243e-13	1.553e-10
Cluster-34894.26752	99.2047	23.4447	1.8589	1.3754e-05	0.00051278
Cluster-34894.23907	203.379	53.6549	1.858	1.0298e-13	4.0624e-11
Cluster-34894.71490	40.5853	9.38563	1.8579	2.8184e-05	0.00093323
Cluster-34894.20373	265.897	69.9097	1.8574	5.1118e-13	1.7412e-10
Cluster-34894.90646	91.1067	23.0054	1.857	7.2044e-08	5.815e-06
Cluster-34894.89396	94.8437	23.3578	1.8559	1.5353e-06	8.0868e-05
Cluster-34894.96808	133.263	31.7684	1.8558	9.1419e-06	0.00036407
Cluster-34894.17434	142.68	36.9058	1.855	4.4553e-10	6.8092e-08
Cluster-34894.84377	62.2814	15.4003	1.8542	8.1953e-07	4.7209e-05
Cluster-34894.14400	25.4878	5.28864	1.8536	0.00051083	0.009775
Cluster-34894.94575	314.299	82.5544	1.8529	6.003e-12	1.5153e-09
Cluster-34894.16831	58.3906	14.4037	1.8528	1.0977e-06	6.0656e-05
Cluster-34894.84009	33.9505	7.21007	1.8522	0.00035519	0.0073211
Cluster-34894.102323	61.5654	14.347	1.8518	4.1804e-05	0.0012888
Cluster-34894.90794	54.8954	12.7013	1.8515	2.8915e-05	0.00095187
Cluster-34894.37206	45.1603	10.8377	1.8504	8.7259e-06	0.00035154
Cluster-34894.42498	71.0251	17.8502	1.8498	3.3624e-07	2.1973e-05
Cluster-34894.26266	270.768	70.8141	1.8495	2.1181e-10	3.5269e-08
Cluster-34894.37069	178.951	45.8548	1.8495	5.1172e-09	5.7676e-07
Cluster-34894.91749	42.173	9.66878	1.8493	5.0616e-05	0.0015053
Cluster-34894.104310	214.413	56.3312	1.8488	4.2765e-11	8.768e-09
Cluster-34894.8046	51.8741	12.4446	1.8486	9.5434e-06	0.00037677
Cluster-34894.96049	45.4659	10.5508	1.8483	2.9705e-05	0.00097229
Cluster-34894.99676	28.3495	6.25623	1.8473	0.00020231	0.0046546
Cluster-34894.81977	3837.02	1034.97	1.8472	6.3638e-19	8.127e-16
Cluster-34894.33566	85.7242	21.8063	1.847	3.4858e-08	3.1045e-06
Cluster-34894.8493	28.5223	6.30529	1.8459	0.00021185	0.0048305
Cluster-34894.84875	1024.49	272.8	1.8452	1.1957e-13	4.6801e-11
Cluster-34894.58316	6114.27	1625.04	1.8449	3.9891e-13	1.3851e-10
Cluster-34894.56369	8259.22	2173.38	1.8438	4.8559e-11	9.7179e-09
Cluster-34894.72213	108.136	27.7316	1.8433	4.1332e-08	3.592e-06
Cluster-34894.50292	1730.9	468.356	1.8432	3.9641e-19	5.4307e-16
Cluster-34894.52725	198.352	48.7701	1.843	3.1624e-06	0.0001486
Cluster-34894.29668	163.538	43.1934	1.8419	1.6546e-11	3.7607e-09
Cluster-34894.21646	35.4831	7.57115	1.8418	0.00033094	0.0069111
Cluster-34894.67261	2470.39	662.807	1.8399	1.7281e-14	8.1892e-12
Cluster-34894.97051	500.261	135.649	1.8394	7.6434e-19	9.4411e-16
Cluster-34894.25450	509.265	135.085	1.8394	3.825e-12	1.0289e-09
Cluster-34894.96585	383.718	103.423	1.839	1.2459e-15	7.6323e-13
Cluster-34894.46148	54.0812	13.2436	1.8388	6.4995e-06	0.00027435
Cluster-34894.30749	1283.72	348.585	1.8374	1.1367e-18	1.3704e-15
Cluster-34894.20317	94.1135	24.2914	1.8354	3.3762e-08	3.0284e-06
Cluster-34894.59783	1481.43	390.273	1.8352	2.3485e-10	3.8426e-08
Cluster-34894.12509	41.38	9.64485	1.8342	4.6002e-05	0.0013898
Cluster-34894.87319	572.108	155.612	1.8341	1.1447e-17	1.1201e-14
Cluster-34894.88489	48.1529	11.4833	1.8334	2.8252e-05	0.00093508
Cluster-34894.58826	56.8542	13.3769	1.8328	4.7702e-05	0.0014325
Cluster-34894.76188	210.901	56.7138	1.8323	1.4692e-13	5.6432e-11
Cluster-34894.85958	318.017	80.9213	1.8322	2.575e-07	1.7503e-05
Cluster-34894.83089	370.259	99.5627	1.8316	9.2811e-14	3.6972e-11
Cluster-34894.79824	105.662	27.6535	1.8312	4.7312e-09	5.3727e-07
Cluster-34894.33992	25.6606	5.65225	1.8309	0.00032707	0.0068417
Cluster-34894.93414	76.3885	18.5083	1.8302	1.0547e-05	0.0004098
Cluster-34894.14142	97.8155	24.4978	1.8293	2.2554e-06	0.00011237
Cluster-34894.76710	34.4147	7.78384	1.8293	0.00015773	0.0038136
Cluster-34894.53867	719.56	197.567	1.8286	3.4052e-22	6.752e-19
Cluster-34894.29280	163.739	43.4263	1.8286	5.835e-10	8.6291e-08
Cluster-34894.34901	91.463	23.6019	1.8286	7.965e-08	6.3406e-06
Cluster-34894.36277	28.3199	6.28645	1.8281	0.00027693	0.0060002
Cluster-34894.84881	150.18	40.0742	1.8272	5.9336e-11	1.1643e-08
Cluster-34894.71031	462.185	126.086	1.8269	1.7247e-16	1.326e-13
Cluster-15149.0	50.6807	12.3225	1.8266	1.2489e-05	0.00047277
Cluster-23479.1	117.181	30.696	1.8252	1.6797e-08	1.6641e-06
Cluster-34894.3856	259.79	68.7769	1.8247	1.3649e-09	1.8074e-07
Cluster-34894.98979	98.8003	24.8728	1.824	2.2754e-06	0.00011313
Cluster-34894.15292	46.9057	11.1813	1.824	4.5625e-05	0.0013819
Cluster-34894.41360	2628.36	694.789	1.8236	1.4907e-09	1.9567e-07
Cluster-34894.15299	122.204	32.0147	1.8234	1.7546e-08	1.7315e-06
Cluster-34894.49528	44.1482	10.8012	1.8233	1.1983e-05	0.00045668
Cluster-34894.85012	350.598	94.6001	1.8228	1.0372e-12	3.2629e-10
Cluster-14563.0	31.4863	7.03388	1.8219	0.00021411	0.0048695
Cluster-34894.16716	68.7472	16.1616	1.8218	8.1634e-05	0.0022337
Cluster-34894.104028	377.067	101.236	1.8217	1.7634e-11	3.9841e-09
Cluster-34894.15922	46.6338	11.4052	1.8207	1.2221e-05	0.00046436
Cluster-34894.70441	83.913	20.1829	1.8206	3.3605e-05	0.0010759
Cluster-34894.49984	1513.95	401.242	1.8195	2.1581e-09	2.7169e-07
Cluster-34894.27520	24.2192	5.26471	1.8193	0.00049263	0.0094942
Cluster-34894.100758	280.748	76.478	1.8192	2.9942e-14	1.331e-11
Cluster-34894.11396	36.4427	8.54755	1.8184	9.4109e-05	0.0025094
Cluster-34894.95237	704.029	191.49	1.8174	5.7528e-14	2.3948e-11
Cluster-34894.97991	160.536	43.2324	1.8171	5.8435e-11	1.1481e-08
Cluster-34894.97469	158.521	41.4195	1.8171	5.3619e-08	4.4939e-06
Cluster-34894.23279	54.5445	13.6474	1.8164	3.688e-06	0.00016928
Cluster-34894.100352	43.261	10.001	1.8161	0.00013224	0.003308
Cluster-34894.12466	91.1492	23.9592	1.8148	2.656e-08	2.4718e-06
Cluster-34894.75562	199.235	51.2731	1.8131	7.1809e-07	4.2122e-05
Cluster-34894.84642	856.25	235.583	1.8126	5.483e-16	3.656e-13
Cluster-34894.42178	181.447	48.0909	1.8125	7.328e-09	7.916e-07
Cluster-34894.10182	56.9395	14.2363	1.8118	8.4766e-06	0.00034412
Cluster-34894.32868	544.157	149.471	1.8114	4.0744e-15	2.2408e-12
Cluster-34894.95357	238.655	65.2941	1.8111	2.1284e-13	7.9586e-11
Cluster-34894.50166	37.9829	9.05342	1.8109	5.7213e-05	0.0016659
Cluster-34894.83421	307.146	83.1657	1.8101	1.6168e-11	3.6859e-09
Cluster-34894.101381	56.022	13.7985	1.81	1.9879e-05	0.00070042
Cluster-34894.7650	121.433	30.9187	1.8092	3.3239e-06	0.00015474
Cluster-34894.29510	28.115	6.31666	1.8089	0.00036748	0.0075333
Cluster-34894.55942	13490.5	3729.82	1.8088	4.3912e-17	3.7598e-14
Cluster-34894.24533	135.215	36.2402	1.8078	7.0122e-10	1.0161e-07
Cluster-34894.48433	50.9882	12.6496	1.8078	1.1307e-05	0.00043524
Cluster-34894.40314	50.2247	12.2923	1.8072	2.4585e-05	0.0008384
Cluster-34894.18117	74.4137	19.199	1.8066	1.0859e-06	6.0115e-05
Cluster-34894.14945	29.7846	6.88415	1.8052	0.00019456	0.0045141
Cluster-34894.101644	155.377	39.6048	1.8048	2.3901e-06	0.00011767
Cluster-34894.100032	216.545	57.7165	1.8046	1.5955e-08	1.5859e-06
Cluster-34894.34030	785.594	218.995	1.8036	4.2455e-19	5.7191e-16
Cluster-34894.78956	124.089	32.2238	1.8035	4.7324e-07	2.9493e-05
Cluster-34894.71838	504.372	129.719	1.8034	1.2626e-06	6.8614e-05
Cluster-34894.84117	56.08	13.1367	1.8031	0.00013128	0.0032886
Cluster-34894.35043	104.077	27.0131	1.8029	2.7889e-07	1.8737e-05
Cluster-34894.60440	1117	310.445	1.8027	1.606e-17	1.5032e-14
Cluster-34894.24926	60.4601	15.5286	1.802	2.4187e-06	0.0001188
Cluster-34894.40996	335.982	92.3422	1.8014	4.1068e-13	1.4194e-10
Cluster-34894.63617	37.6581	8.94647	1.8014	0.0001294	0.0032516
Cluster-34894.27724	24.8445	5.48743	1.8006	0.00049225	0.0094894
Cluster-34894.41601	142.647	35.5469	1.8005	1.3056e-05	0.000491
Cluster-34894.43169	318.737	87.546	1.8002	7.1305e-13	2.341e-10
Cluster-34894.65059	36.4257	8.77537	1.8002	6.2108e-05	0.001779
Cluster-34894.69838	738.526	197.872	1.7981	7.6731e-09	8.2769e-07
Cluster-34894.99672	102.764	27.5138	1.7977	1.1857e-08	1.2247e-06
Cluster-34894.96744	31.3195	7.19242	1.7976	0.00026417	0.0057685
Cluster-23808.0	37.5322	9.12013	1.797	5.1539e-05	0.0015304
Cluster-34894.22526	120.25	32.4363	1.7969	5.2212e-09	5.8716e-07
Cluster-34894.16125	78.4905	19.6305	1.7968	1.9879e-05	0.00070042
Cluster-34894.40744	83.3031	21.7621	1.7964	7.3165e-07	4.2784e-05
Cluster-34894.64791	40.6747	9.91287	1.7962	6.4536e-05	0.0018391
Cluster-34894.32540	45.8583	10.6754	1.7961	0.0002473	0.0054618
Cluster-34894.100981	47.5301	11.7613	1.796	2.8343e-05	0.00093747
Cluster-34894.98866	92.6208	24.6853	1.7956	4.4303e-08	3.8106e-06
Cluster-34894.25634	46.7506	11.7134	1.7951	1.2777e-05	0.00048161
Cluster-34894.82882	456.025	125.784	1.7949	1.1419e-12	3.5408e-10
Cluster-34894.59928	8469.37	2253.87	1.7948	5.0591e-08	4.2686e-06
Cluster-34894.23352	64.6478	16.539	1.7948	5.0236e-06	0.00022007
Cluster-34894.87239	27.6329	6.12791	1.7946	0.00051636	0.0098659
Cluster-34894.33421	154.747	41.851	1.7939	3.0536e-09	3.655e-07
Cluster-34894.83200	109.821	29.4341	1.7938	1.4046e-08	1.4214e-06
Cluster-34894.78290	127.529	34.3389	1.7933	1.2641e-08	1.2994e-06
Cluster-34894.28238	46.2927	11.0453	1.7933	0.0001443	0.0035577
Cluster-34894.83533	304.415	83.3341	1.7923	6.5338e-11	1.2623e-08
Cluster-34894.33419	380.533	103.852	1.7921	3.0131e-10	4.7947e-08
Cluster-15271.0	48.4959	12.2344	1.7921	1.6586e-05	0.00060095
Cluster-34894.98645	101.486	26.4835	1.7908	1.0124e-06	5.6677e-05
Cluster-34894.53524	82.8537	19.949	1.7905	9.3794e-05	0.0025039
Cluster-34894.100616	324.379	87.4604	1.7904	4.4301e-09	5.1039e-07
Cluster-34894.32274	137.36	36.5976	1.7888	1.1174e-07	8.5521e-06
Cluster-34894.97237	1498.81	378.657	1.7887	1.4872e-05	0.00054863
Cluster-34894.77939	137.94	36.6654	1.7885	7.7471e-08	6.1933e-06
Cluster-34894.99625	239.663	65.829	1.7874	1.0633e-10	1.9375e-08
Cluster-34894.32237	229.75	63.5199	1.7872	7.0784e-12	1.7486e-09
Cluster-34894.92828	198.758	54.3823	1.7869	2.1237e-10	3.5284e-08
Cluster-34894.36035	278.678	76.0301	1.7869	3.6677e-10	5.7218e-08
Cluster-34894.60187	115.549	31.1177	1.7854	4.1738e-08	3.6147e-06
Cluster-34894.26933	42.1862	10.5118	1.7839	3.6474e-05	0.0011532
Cluster-34894.100382	153.26	39.8639	1.7837	2.0345e-06	0.00010302
Cluster-34894.28196	113.096	30.5212	1.7831	1.6053e-08	1.5946e-06
Cluster-34894.13549	40.6485	10.1054	1.7824	3.8774e-05	0.0012128
Cluster-34894.31774	162.489	44.2517	1.7815	1.8211e-09	2.3356e-07
Cluster-34894.98266	55.0379	14.1935	1.7814	6.6845e-06	0.00028074
Cluster-34894.15709	55.5386	14.1331	1.7811	1.481e-05	0.00054674
Cluster-34894.27309	49.4706	12.6861	1.7807	7.2836e-06	0.00030187
Cluster-34894.66229	133.02	36.4138	1.7794	8.8201e-10	1.2412e-07
Cluster-34894.14495	336.416	93.889	1.7789	1.7565e-12	5.1798e-10
Cluster-34894.106840	80.4411	21.2966	1.7785	1.1471e-06	6.3042e-05
Cluster-34894.476	73.4897	19.2997	1.7785	1.3701e-06	7.3765e-05
Cluster-34894.105700	30.8137	7.29053	1.7782	0.00026211	0.0057343
Cluster-34894.29608	381.253	107.745	1.7777	1.5629e-16	1.2078e-13
Cluster-34894.10620	43.0737	10.9107	1.7777	2.5919e-05	0.00087554
Cluster-34894.104957	186.081	51.6581	1.7774	2.2138e-11	4.8773e-09
Cluster-34894.84744	309.753	86.7017	1.777	3.8637e-13	1.3478e-10
Cluster-34894.90795	69.5573	17.7546	1.777	1.0708e-05	0.00041523
Cluster-34894.6548	33.7626	7.78384	1.777	0.00038526	0.0078141
Cluster-34894.96637	183.513	49.8207	1.7767	2.3309e-08	2.2049e-06
Cluster-34894.94211	90.8707	24.5581	1.7761	5.6278e-08	4.6959e-06
Cluster-34894.50037	59.8222	15.3085	1.7761	1.0938e-05	0.00042273
Cluster-34894.22527	51.093	13.2197	1.7759	8.5056e-06	0.00034474
Cluster-34894.99254	74.8901	19.8093	1.7753	1.5593e-06	8.1986e-05
Cluster-9512.1	55.747	13.9998	1.7751	4.8261e-05	0.0014461
Cluster-34894.12862	46.1281	11.4958	1.7749	5.3645e-05	0.0015817
Cluster-34894.27174	165.226	45.8234	1.7747	1.8676e-10	3.1621e-08
Cluster-34894.82207	838.619	238.389	1.7745	2.6974e-18	2.9964e-15
Cluster-34894.17130	196.817	53.7242	1.7742	9.2014e-09	9.7511e-07
Cluster-34894.27484	113.345	31.1956	1.7734	2.2917e-09	2.8495e-07
Cluster-34894.40129	658.712	183.611	1.7729	1.9122e-11	4.2689e-09
Cluster-34894.96380	101.461	27.2132	1.7729	4.0809e-07	2.5959e-05
Cluster-34894.75765	120.94	31.7633	1.772	2.3124e-06	0.0001147
Cluster-34894.75435	151.315	41.8194	1.7694	3.1396e-09	3.743e-07
Cluster-34894.96289	38.3341	9.02202	1.769	0.00030415	0.0064522
Cluster-34894.51255	358.063	100.966	1.7689	7.8143e-14	3.1473e-11
Cluster-34894.104514	196.897	55.0718	1.7688	4.5429e-11	9.2263e-09
Cluster-34894.34785	48.2583	12.3476	1.7681	1.8394e-05	0.00065607
Cluster-34894.86735	138.371	38.4371	1.768	4.0377e-10	6.2599e-08
Cluster-34894.32814	350.885	99.126	1.7663	7.2119e-13	2.3574e-10
Cluster-34894.97152	55.8121	13.4637	1.765	0.00027374	0.0059422
Cluster-34894.29564	52.6303	12.7705	1.7646	0.00020332	0.0046721
Cluster-34894.17719	52.2599	12.7516	1.7635	0.00016499	0.0039534
Cluster-34894.101283	25.5759	5.94796	1.7632	0.00051894	0.0099052
Cluster-34894.13554	76.5628	19.3438	1.7631	4.5495e-05	0.0013793
Cluster-34894.17801	41.8656	10.5533	1.7631	5.8434e-05	0.001695
Cluster-34894.97043	321.691	91.1018	1.7629	1.787e-13	6.7833e-11
Cluster-18508.0	32.5179	7.86939	1.7629	0.00021409	0.0048695
Cluster-34894.65597	101.549	27.9744	1.7627	1.7504e-08	1.7286e-06
Cluster-34894.96740	216.756	60.0901	1.7622	2.7665e-09	3.3485e-07
Cluster-34894.35213	785.628	204.533	1.7619	1.1524e-05	0.00044221
Cluster-34894.64717	95.6811	26.0643	1.7617	1.6327e-07	1.1857e-05
Cluster-34894.99200	85.5061	23.2332	1.7616	1.3997e-07	1.0422e-05
Cluster-34894.32549	781.696	223.482	1.7613	2.1765e-16	1.6318e-13
Cluster-17519.0	133.441	36.2652	1.7609	3.2299e-07	2.1221e-05
Cluster-34894.70759	291.013	77.7794	1.7603	1.238e-06	6.7448e-05
Cluster-34894.79481	143.03	38.6197	1.7601	4.8079e-07	2.9902e-05
Cluster-34894.18835	67.1856	17.8388	1.76	3.4274e-06	0.00015872
Cluster-34894.81524	94.5123	25.5647	1.7593	7.0033e-07	4.1273e-05
Cluster-34894.41420	96.6272	26.4431	1.7591	4.7968e-08	4.0862e-06
Cluster-34894.44917	31.7802	7.56112	1.7591	0.00036847	0.0075495
Cluster-34894.10810	35.7573	8.71494	1.7588	0.00016094	0.0038735
Cluster-34894.101011	35.7066	8.62054	1.7584	0.00027205	0.0059107
Cluster-34894.15703	76.7545	20.8273	1.7581	2.0526e-07	1.442e-05
Cluster-34894.49623	631.291	181.469	1.7568	1.4823e-17	1.4049e-14
Cluster-34894.50908	110.727	30.7464	1.7561	4.6055e-09	5.2617e-07
Cluster-34894.82170	609.324	173.6	1.756	1.9627e-13	7.3941e-11
Cluster-34894.36984	264.967	75.2914	1.7559	1.0843e-12	3.4042e-10
Cluster-34894.8751	236.973	67.0005	1.7558	1.6377e-11	3.728e-09
Cluster-34894.83419	214.016	59.769	1.7558	2.277e-09	2.8405e-07
Cluster-34894.97151	43.3072	10.5797	1.755	0.00023616	0.00527
Cluster-24562.0	28.8722	6.73817	1.7548	0.00049089	0.0094718
Cluster-34894.98268	36.8515	9.0962	1.753	0.00014165	0.0035022
Cluster-34894.68072	64.1662	16.7152	1.7527	2.5239e-05	0.00085643
Cluster-34894.41996	269.221	75.1844	1.7522	1.2064e-09	1.6209e-07
Cluster-34894.45300	109.999	29.5562	1.7519	1.0683e-06	5.9337e-05
Cluster-34894.85885	183.091	52.0682	1.7509	1.5549e-11	3.5773e-09
Cluster-34894.58388	563.767	160.468	1.7508	5.9886e-12	1.5142e-09
Cluster-34894.17976	154.577	43.3496	1.7505	2.2817e-09	2.844e-07
Cluster-34894.79586	90.0943	24.2084	1.7505	2.8571e-06	0.00013623
Cluster-34894.84966	53.037	14.0954	1.7503	5.3452e-06	0.00023213
Cluster-34894.55124	246.481	70.3261	1.7498	2.54e-12	7.1812e-10
Cluster-34894.101477	70.8303	18.1735	1.7496	6.187e-05	0.0017745
Cluster-34894.14398	47.9225	12.3414	1.7494	3.4278e-05	0.001093
Cluster-34894.24884	80.1267	21.5396	1.7478	2.0887e-06	0.00010541
Cluster-34894.32665	35.3654	8.84836	1.7473	0.0001343	0.003354
Cluster-34894.58707	119.838	33.6694	1.745	6.2856e-09	6.9038e-07
Cluster-34894.10311	188.024	51.6543	1.7448	3.5908e-07	2.3204e-05
Cluster-34894.20351	85.7147	23.3148	1.7446	1.1275e-06	6.2078e-05
Cluster-34894.99615	288.572	82.3883	1.7445	5.1901e-12	1.3416e-09
Cluster-34894.22385	252.72	71.4486	1.7444	3.1217e-10	4.9311e-08
Cluster-34894.74555	70.0504	18.9172	1.7443	1.9984e-06	0.00010146
Cluster-34894.25219	373.356	108.055	1.7441	3.8069e-16	2.6436e-13
Cluster-34894.20155	96.0902	26.2141	1.7424	9.1959e-07	5.2136e-05
Cluster-34894.46408	1810.9	506.65	1.7409	2.0155e-08	1.9482e-06
Cluster-34894.80920	71.2401	19.2016	1.7409	2.3415e-06	0.00011582
Cluster-34894.80726	68.8992	18.4039	1.7399	8.146e-06	0.00033231
Cluster-34894.15889	97.1417	26.9817	1.7395	1.1522e-07	8.7694e-06
Cluster-33476.2	35.1152	8.86092	1.7391	0.00014458	0.003563
Cluster-34894.100752	158.823	43.5884	1.7386	8.5117e-07	4.8755e-05
Cluster-34894.16272	43.3107	11.1573	1.7386	6.0131e-05	0.0017343
Cluster-34894.14909	98.1665	26.6155	1.7377	3.4669e-06	0.00016021
Cluster-34894.27268	378.889	110.12	1.7373	1.6465e-15	9.8068e-13
Cluster-34894.81829	226.243	63.4482	1.7368	3.2413e-08	2.9265e-06
Cluster-34894.47056	42.6605	10.9837	1.7368	8.7283e-05	0.0023618
Cluster-34894.86322	507.207	146.975	1.7363	5.3057e-14	2.2522e-11
Cluster-34894.63117	4767.64	1398.76	1.7361	2.3161e-20	3.7937e-17
Cluster-34894.49529	34.4748	8.46709	1.7358	0.00031365	0.0066151
Cluster-34894.11345	305.679	87.7927	1.7357	1.0717e-11	2.5392e-09
Cluster-34894.78959	334.031	96.642	1.7356	3.144e-13	1.1148e-10
Cluster-34894.67304	87.0595	24.1127	1.7355	3.6036e-07	2.3256e-05
Cluster-34894.101633	69.2498	18.731	1.7351	3.7547e-06	0.00017187
Cluster-34894.10203	257.13	73.185	1.735	2.2621e-10	3.7255e-08
Cluster-34894.66808	391.628	112.523	1.7347	1.3967e-11	3.2532e-09
Cluster-34894.4857	33.4372	8.17766	1.7346	0.00033457	0.0069737
Cluster-34894.27832	80.718	22.2907	1.7342	4.4663e-07	2.8045e-05
Cluster-34894.57734	2515	722.61	1.7338	2.4077e-11	5.228e-09
Cluster-34894.83440	308.792	85.6573	1.7336	1.7228e-07	1.241e-05
Cluster-34894.64436	81.6936	22.6492	1.7318	3.4512e-07	2.2446e-05
Cluster-34894.20944	70.2437	19.106	1.731	3.6663e-06	0.00016839
Cluster-34894.30737	131.842	36.9436	1.7306	4.0907e-08	3.5612e-06
Cluster-34894.99614	53.6881	13.65	1.7306	9.7369e-05	0.0025814
Cluster-34894.79917	289.6	83.2929	1.7302	2.4613e-11	5.3291e-09
Cluster-34894.39771	1404.4	407.893	1.7292	3.7934e-13	1.3263e-10
Cluster-34894.98646	51.7451	13.8111	1.7285	1.6661e-05	0.00060297
Cluster-34894.7011	30.9705	7.61018	1.7282	0.00040123	0.0080596
Cluster-34894.36780	84.1679	23.3653	1.7279	3.1245e-07	2.0653e-05
Cluster-34894.109255	41.2928	10.5936	1.7278	8.3415e-05	0.0022727
Cluster-34894.36549	36.5721	8.92135	1.7269	0.00049789	0.0095725
Cluster-34894.13455	194.447	55.5412	1.7267	1.1581e-09	1.568e-07
Cluster-34894.84641	893.34	262.951	1.7261	1.2337e-17	1.1918e-14
Cluster-34894.15621	322.388	90.7471	1.7255	4.3856e-08	3.7765e-06
Cluster-34894.13939	75.2914	20.4876	1.7255	4.0425e-06	0.00018294
Cluster-34894.35041	38.3404	9.71274	1.7235	0.00017585	0.004172
Cluster-34894.14402	67.6265	18.2263	1.7227	1.6649e-05	0.00060272
Cluster-34894.52502	262.513	75.8334	1.722	1.1022e-10	1.9964e-08
Cluster-34894.85900	827.125	243.57	1.7213	8.2124e-16	5.2078e-13
Cluster-34894.89547	97.8703	27.5064	1.7208	1.8916e-07	1.3414e-05
Cluster-34894.25611	644.9	180.732	1.7203	2.7725e-07	1.8652e-05
Cluster-34894.93453	461.448	134.258	1.7201	7.6996e-12	1.8897e-09
Cluster-34894.60363	1904.09	549.434	1.72	3.565e-10	5.5874e-08
Cluster-34894.20545	54.9073	14.7673	1.7194	1.857e-05	0.00066125
Cluster-34894.36797	51.4181	13.6714	1.7191	2.6988e-05	0.00090417
Cluster-34894.27433	91.4872	23.982	1.7191	7.3567e-05	0.0020465
Cluster-34894.63391	219.711	57.7697	1.7189	5.5436e-05	0.0016259
Cluster-34894.93964	462.514	136.483	1.7187	2.5477e-16	1.8728e-13
Cluster-34894.89707	118.607	33.6368	1.7185	7.0387e-08	5.6904e-06
Cluster-31356.1	32.3791	8.2695	1.718	0.00021703	0.0049273
Cluster-34894.28345	79.8658	21.1771	1.7176	5.9913e-05	0.0017296
Cluster-34894.41409	196.973	56.427	1.7172	2.7033e-09	3.2933e-07
Cluster-34894.24538	108.924	30.4521	1.717	8.1026e-07	4.6728e-05
Cluster-34894.71321	531.717	151.472	1.7163	2.4661e-08	2.3183e-06
Cluster-34894.69796	332.962	94.346	1.7162	7.4848e-08	6.0059e-06
Cluster-34894.83060	61.5204	17.0021	1.7162	2.2681e-06	0.0001128
Cluster-34894.48533	55.015	14.4301	1.7161	0.00010333	0.0027052
Cluster-34894.30740	35.9857	8.8986	1.7156	0.00051139	0.0097825
Cluster-34894.80913	195.822	54.1384	1.7153	2.5755e-06	0.00012496
Cluster-34894.78560	55.0766	14.7473	1.7153	3.1601e-05	0.0010241
Cluster-34894.106352	163.663	47.3433	1.7152	4.5213e-10	6.896e-08
Cluster-34894.16712	357.604	104.616	1.7146	2.9715e-12	8.2163e-10
Cluster-34894.17396	121.838	34.9982	1.7133	1.3385e-08	1.3611e-06
Cluster-34894.37790	316.145	90.7303	1.7129	1.7665e-08	1.741e-06
Cluster-34894.17122	360.381	105.355	1.7124	1.9485e-11	4.3435e-09
Cluster-34894.15357	63.296	17.3708	1.7124	7.1024e-06	0.00029533
Cluster-34894.16662	136.963	39.6866	1.7121	9.6794e-10	1.3424e-07
Cluster-34894.107576	64.982	18.0238	1.712	2.5928e-06	0.00012551
Cluster-34894.63010	409.741	118.471	1.7118	2.7014e-09	3.2933e-07
Cluster-34894.15343	320.326	94.0011	1.7117	1.4449e-12	4.3374e-10
Cluster-34894.10312	38.2057	9.95565	1.7113	0.00014116	0.0034928
Cluster-34894.94555	69.4295	19.1186	1.71	7.9086e-06	0.00032377
Cluster-34894.54183	548.639	157.402	1.7084	1.7846e-08	1.7566e-06
Cluster-34894.82360	95.5442	26.6055	1.7076	2.8323e-06	0.00013528
Cluster-34894.38829	1007.59	293.371	1.7073	5.0647e-10	7.6246e-08
Cluster-34894.58035	1935.71	569.527	1.7065	6.6388e-12	1.6591e-09
Cluster-34894.77912	550.447	162.999	1.7063	1.3659e-13	5.2777e-11
Cluster-34894.27736	49.4536	12.247	1.7063	0.00045377	0.0088933
Cluster-34894.100208	91.1216	25.9058	1.7062	1.786e-07	1.2786e-05
Cluster-34894.11469	31.4098	7.93729	1.706	0.00038917	0.0078678
Cluster-34894.52489	51.6384	13.8841	1.7059	4.3336e-05	0.001327
Cluster-34894.16446	57.3269	15.54	1.7058	2.8388e-05	0.00093874
Cluster-34894.22822	213.9	61.7871	1.7057	6.6623e-09	7.2436e-07
Cluster-34894.11288	31.2323	7.74735	1.705	0.00049972	0.0095978
Cluster-34894.14832	233.172	67.8436	1.7047	4.5379e-10	6.9144e-08
Cluster-34894.40315	98.732	26.6168	1.7031	2.5363e-05	0.00085965
Cluster-22213.1	51.2337	13.9394	1.7031	2.8874e-05	0.00095128
Cluster-34894.29783	65.7228	18.0087	1.7028	8.22e-06	0.00033485
Cluster-34894.67851	170.685	49.9253	1.7027	2.9821e-10	4.7604e-08
Cluster-34894.67420	42.0279	11.0604	1.7022	0.0001165	0.002981
Cluster-34894.27829	298.318	87.4869	1.7018	1.6396e-10	2.8302e-08
Cluster-34894.16651	107.805	30.3602	1.7016	1.6952e-06	8.8272e-05
Cluster-34894.101340	114.316	33.0366	1.7015	1.4884e-08	1.4913e-06
Cluster-34894.101306	61.7486	16.9819	1.701	1.8337e-05	0.00065495
Cluster-34894.13132	140.991	40.2616	1.6997	3.7217e-07	2.3937e-05
Cluster-34894.59652	6417.14	1869.1	1.6996	3.3575e-09	3.9807e-07
Cluster-34894.33108	182.9	53.7418	1.6994	9.0452e-11	1.6725e-08
Cluster-34894.36172	40.9239	10.5345	1.6992	0.00028803	0.0061883
Cluster-34894.97414	54.6933	15.1725	1.6984	9.3034e-06	0.00036956
Cluster-34894.98187	302.706	90.3518	1.6981	5.2016e-14	2.2205e-11
Cluster-34894.9708	58.6436	16.3981	1.6972	4.1538e-06	0.00018702
Cluster-34894.71992	315.525	94.1457	1.6971	7.4721e-14	3.0351e-11
Cluster-34894.85990	99.6896	28.679	1.6967	8.436e-08	6.6663e-06
Cluster-34894.87307	350.75	104.632	1.6959	4.9127e-13	1.6787e-10
Cluster-34894.18699	303.082	89.699	1.6958	2.1985e-11	4.8577e-09
Cluster-34894.69959	55.4015	15.1046	1.6958	2.7622e-05	0.00092007
Cluster-34894.36444	1448.17	407.201	1.6955	2.7655e-06	0.00013251
Cluster-34894.76650	2146.33	613.881	1.6953	3.2209e-07	2.1177e-05
Cluster-34894.57201	173.748	49.5979	1.6953	6.4183e-07	3.8305e-05
Cluster-34894.30534	99.165	28.4274	1.6942	3.9212e-07	2.5038e-05
Cluster-34894.23277	255.264	75.2714	1.6941	1.9298e-10	3.2528e-08
Cluster-34894.58246	885.667	260.62	1.693	7.807e-10	1.1141e-07
Cluster-34894.29731	224.589	66.9966	1.6925	2.0493e-12	5.955e-10
Cluster-34894.32809	296.119	79.9149	1.6924	6.5752e-05	0.0018661
Cluster-34894.15920	48.7292	12.5327	1.6913	0.00030932	0.0065421
Cluster-34894.44833	328.78	97.5481	1.6912	8.8069e-11	1.641e-08
Cluster-34894.83191	95.8165	26.8647	1.6909	5.3086e-06	0.00023074
Cluster-34894.92936	190.08	55.467	1.6906	1.2415e-08	1.278e-06
Cluster-34894.9923	49.4159	13.085	1.6902	0.00014842	0.0036356
Cluster-34894.76768	546.781	164.823	1.6887	6.0833e-16	3.9857e-13
Cluster-34894.31503	272.974	81.5992	1.6877	6.08e-12	1.5321e-09
Cluster-34894.82714	182.496	54.1482	1.6872	8.1089e-11	1.5256e-08
Cluster-34894.88112	338.294	101.168	1.6861	2.5231e-12	7.1469e-10
Cluster-34894.90167	120.64	33.9626	1.6857	3.6032e-06	0.0001658
Cluster-34894.75015	180.652	53.4789	1.6853	7.8061e-10	1.1141e-07
Cluster-34894.104639	183.076	53.7709	1.6853	5.0914e-09	5.7428e-07
Cluster-34894.50117	967.176	291.476	1.6847	2.3042e-14	1.0522e-11
Cluster-34894.85599	89.4737	25.8239	1.6847	5.9468e-07	3.5947e-05
Cluster-34894.14660	212.726	61.0246	1.6845	6.0938e-07	3.6673e-05
Cluster-34894.108385	36.6529	9.76061	1.6835	0.00014242	0.003519
Cluster-34894.89541	184.877	54.5935	1.6833	2.2923e-09	2.8495e-07
Cluster-34894.55783	102.442	29.5434	1.6828	7.7278e-07	4.4738e-05
Cluster-34894.31028	371.624	103.772	1.6822	1.3595e-05	0.00050756
Cluster-34894.40504	173.681	51.478	1.6819	6.8159e-10	9.8951e-08
Cluster-34894.96476	353.742	106.442	1.6815	2.3586e-12	6.757e-10
Cluster-34894.54655	133.085	38.5479	1.6813	4.6925e-07	2.9293e-05
Cluster-34894.15653	113.227	32.8176	1.6812	1.8519e-07	1.3164e-05
Cluster-34894.83640	46.8088	12.588	1.6812	9.4136e-05	0.0025094
Cluster-34894.31740	392.694	118.87	1.681	7.8085e-15	4.0436e-12
Cluster-34894.25592	48.4255	13.4059	1.6806	2.7041e-05	0.00090554
Cluster-34894.103764	174.13	51.5133	1.6803	4.6303e-09	5.282e-07
Cluster-34894.53686	194.726	57.382	1.6799	3.379e-09	4.0031e-07
Cluster-34894.26980	166.558	49.2799	1.6797	1.185e-09	1.5973e-07
Cluster-34894.9365	37.8432	9.94684	1.6797	0.00021987	0.0049786
Cluster-34894.28893	68.7689	19.3262	1.6796	1.6242e-05	0.0005911
Cluster-34894.41156	201.866	57.5268	1.6795	3.2477e-06	0.0001518
Cluster-34894.38626	1928.36	575.597	1.6786	1.6089e-10	2.7836e-08
Cluster-34894.67113	759.439	230.322	1.6785	1.5076e-14	7.2817e-12
Cluster-34894.66553	686.643	204.646	1.6784	4.2166e-10	6.4905e-08
Cluster-34894.80737	64.4092	16.9618	1.6784	0.00030992	0.00655
Cluster-34894.81216	32.5963	8.43688	1.6777	0.00039688	0.0079915
Cluster-34894.83047	418.78	125.792	1.6775	6.9515e-12	1.7258e-09
Cluster-34894.82436	760.614	227.898	1.6775	3.8379e-11	7.9993e-09
Cluster-34894.72148	139.349	40.8681	1.6774	2.2783e-08	2.1661e-06
Cluster-34894.6506	149.168	43.3206	1.6769	2.0125e-07	1.4165e-05
Cluster-34894.100505	140.014	41.1526	1.6764	3.7363e-08	3.2945e-06
Cluster-34894.29696	222.675	64.4955	1.6754	6.5687e-07	3.9104e-05
Cluster-34894.89545	323.578	96.8133	1.6752	4.8519e-10	7.3483e-08
Cluster-32401.0	34.1733	8.92135	1.6749	0.00041838	0.0083439
Cluster-34894.85328	392.414	118.79	1.6737	7.8399e-13	2.5352e-10
Cluster-34894.89059	199.249	58.3537	1.6734	1.2781e-07	9.6155e-06
Cluster-34894.94565	201.579	56.9519	1.6733	8.7271e-06	0.00035154
Cluster-34894.53919	3138.16	961.432	1.673	3.6063e-18	3.8542e-15
Cluster-34894.37207	90.5837	26.5223	1.6724	1.8662e-07	1.3259e-05
Cluster-34894.63389	302.548	81.0469	1.672	0.00018872	0.0044085
Cluster-34894.79362	4497.3	1380.85	1.6719	4.2506e-19	5.7191e-16
Cluster-34894.64839	82.9472	24.0725	1.671	5.0153e-07	3.1e-05
Cluster-34894.32793	364.153	109.692	1.6709	1.2231e-10	2.1839e-08
Cluster-34894.38372	328.02	99.1549	1.6708	3.568e-12	9.6705e-10
Cluster-34894.68367	320.534	97.1568	1.6706	1.153e-12	3.5678e-10
Cluster-34894.115	44.7817	12.3716	1.6704	4.9263e-05	0.0014715
Cluster-34894.22594	45.9616	12.4748	1.6704	0.00013391	0.003346
Cluster-19093.0	160.096	48.1361	1.6703	1.4256e-10	2.4923e-08
Cluster-34894.31327	65.8537	18.1785	1.6703	6.6184e-05	0.0018754
Cluster-34894.28142	153.611	40.7523	1.6701	0.0003227	0.0067721
Cluster-34894.84190	181.837	54.1696	1.6699	1.7693e-09	2.2769e-07
Cluster-34894.48785	327.695	99.0054	1.6694	1.6145e-11	3.6859e-09
Cluster-34894.38023	31.1942	8.09839	1.6692	0.00048952	0.0094539
Cluster-34894.11265	89.4416	26.2015	1.6691	2.6267e-07	1.7806e-05
Cluster-34894.83192	217.357	65.1342	1.6688	1.4727e-09	1.9365e-07
Cluster-34894.75659	769.035	231.508	1.6685	8.8813e-11	1.6491e-08
Cluster-34894.83063	52.0843	14.0514	1.6683	0.00016811	0.0040179
Cluster-34894.12706	88.0008	25.707	1.6682	5.6712e-07	3.4516e-05
Cluster-34894.76226	152.261	42.4748	1.6681	4.6266e-05	0.0013969
Cluster-34894.60987	412.712	125.267	1.6673	4.4903e-12	1.1768e-09
Cluster-34894.70519	41.3211	11.0327	1.6671	0.00031871	0.006705
Cluster-34894.58254	50.8091	13.9822	1.6666	0.00010377	0.0027157
Cluster-34894.57222	321.027	96.2383	1.6661	2.0233e-09	2.5665e-07
Cluster-34894.45539	1993.88	580.134	1.666	1.0125e-06	5.6677e-05
Cluster-34894.17316	35.8803	9.59323	1.666	0.00029607	0.0063169
Cluster-34894.18035	35.0724	9.27867	1.6655	0.00038881	0.0078624
Cluster-34894.68722	342.12	104.12	1.6646	5.7446e-12	1.4697e-09
Cluster-34894.19407	51.6393	14.4151	1.664	4.217e-05	0.0012988
Cluster-34894.46661	44.0138	12.0708	1.6635	0.00010597	0.0027644
Cluster-34894.84845	78.352	22.9073	1.6628	7.9183e-07	4.5736e-05
Cluster-34894.71563	499.755	148.419	1.662	4.8314e-08	4.1111e-06
Cluster-34894.104963	48.1019	13.2511	1.6615	0.00011687	0.0029874
Cluster-34894.88343	115.618	34.5993	1.6613	1.5391e-08	1.5367e-06
Cluster-34894.17806	120.434	35.7871	1.6607	3.9332e-08	3.444e-06
Cluster-34894.85513	694.386	213.303	1.6605	2.1338e-14	9.8335e-12
Cluster-34894.68407	1112.69	342.645	1.6604	1.3332e-15	8.101e-13
Cluster-32623.0	46.7408	12.9553	1.6603	9.9966e-05	0.0026368
Cluster-34894.76752	143.565	43.1922	1.6602	2.7905e-09	3.3739e-07
Cluster-34894.8715	55.3989	15.4972	1.6602	5.3492e-05	0.0015782
Cluster-34894.29157	84.3143	24.6525	1.66	6.7945e-07	4.0247e-05
Cluster-34894.16837	40.8279	10.6842	1.6599	0.00050297	0.0096479
Cluster-34894.53341	2624.16	804.424	1.6589	2.3214e-13	8.5952e-11
Cluster-34894.29206	338.494	103.655	1.6585	6.3571e-13	2.1101e-10
Cluster-34894.45949	353.457	107.467	1.6583	5.003e-11	9.9626e-09
Cluster-34894.55089	1891.7	564.312	1.6582	3.8509e-08	3.3758e-06
Cluster-34894.83924	60.7516	16.7756	1.6576	0.00014036	0.0034778
Cluster-37016.0	54.7711	14.7598	1.6573	0.00024762	0.0054673
Cluster-34894.77308	382.234	115.762	1.6568	4.23e-10	6.4978e-08
Cluster-34894.9691	45.621	12.5829	1.6566	9.2412e-05	0.0024732
Cluster-34894.19109	122.463	33.3651	1.6556	0.00017205	0.0040945
Cluster-34894.90806	375.968	115.128	1.6555	1.4276e-12	4.3025e-10
Cluster-34894.78961	136.328	40.7147	1.6552	6.0018e-08	4.9558e-06
Cluster-34894.33974	90.0541	26.467	1.6552	6.3167e-07	3.7804e-05
Cluster-34894.99070	52.3789	14.7724	1.6548	4.7192e-05	0.0014192
Cluster-34894.19544	119.845	35.5155	1.6543	3.5168e-07	2.2814e-05
Cluster-34894.75282	64.5977	17.5231	1.6542	0.00019451	0.0045137
Cluster-34894.84230	555.613	171.981	1.6541	1.4271e-15	8.6369e-13
Cluster-34894.34549	79.0916	23.0344	1.6539	3.8806e-06	0.00017656
Cluster-34894.11820	57.2708	16.105	1.6535	3.8167e-05	0.001197
Cluster-34894.30099	78.7822	23.2583	1.6523	7.1522e-07	4.2019e-05
Cluster-34894.85191	64.8794	18.2604	1.6521	6.4351e-05	0.0018345
Cluster-34894.17575	59.2406	17.1732	1.6518	8.1633e-06	0.00033276
Cluster-34894.16474	32.7007	8.77537	1.6518	0.00033592	0.0069957
Cluster-34894.100795	36.0156	9.67878	1.6517	0.0004127	0.0082459
Cluster-34894.38564	1573.76	487.709	1.6515	2.5318e-15	1.4507e-12
Cluster-34894.83420	305.612	93.8133	1.6507	6.6266e-12	1.6588e-09
Cluster-34896.0	101.33	29.8744	1.6501	1.5121e-06	7.9811e-05
Cluster-34894.72138	116.708	34.9743	1.65	8.0318e-08	6.3904e-06
Cluster-34894.43168	68.3227	19.7867	1.6489	6.6094e-06	0.00027821
Cluster-34894.85230	64.9228	18.4404	1.6489	3.9502e-05	0.0012309
Cluster-34894.59881	11998.6	3711.86	1.6488	7.1404e-14	2.916e-11
Cluster-34894.16629	254.373	76.6806	1.6484	2.5828e-08	2.4145e-06
Cluster-34894.62355	38.2835	10.2979	1.6484	0.00032849	0.0068656
Cluster-34894.14022	35.705	9.77945	1.6483	0.00019812	0.0045802
Cluster-34894.24883	1468.58	442.291	1.6473	3.0802e-08	2.8047e-06
Cluster-34894.14995	98.9523	29.5157	1.6473	2.8051e-07	1.8838e-05
Cluster-34894.43016	50.4409	14.2514	1.6461	4.8626e-05	0.0014548
Cluster-34894.44921	234.88	72.3141	1.646	1.0307e-11	2.4536e-09
Cluster-34894.34740	120.306	35.0121	1.6459	9.7667e-06	0.00038468
Cluster-34894.31588	121.282	36.2578	1.6456	1.4777e-07	1.0926e-05
Cluster-34894.59117	343.701	103.891	1.6455	2.0934e-08	2.0132e-06
Cluster-34894.60505	4017.92	1255.43	1.6453	1.3157e-17	1.2549e-14
Cluster-34894.99067	276.49	84.4922	1.6452	4.3204e-10	6.6232e-08
Cluster-34894.73615	61.9878	17.5859	1.6444	6.0001e-05	0.0017318
Cluster-34894.96502	78.4914	22.7562	1.6438	1.0352e-05	0.00040363
Cluster-34894.99778	42.1069	11.7927	1.6435	9.9944e-05	0.0026367
Cluster-34894.41191	2037.72	637.919	1.643	1.2986e-17	1.2464e-14
Cluster-34894.101674	58.4913	16.4397	1.643	8.9148e-05	0.0024034
Cluster-34894.24264	132.998	38.9402	1.6429	6.7614e-06	0.00028337
Cluster-34894.7700	128.193	38.7291	1.642	2.6257e-08	2.4531e-06
Cluster-34894.80767	805.273	252.6	1.6417	4.627e-18	4.7758e-15
Cluster-34894.24432	62.9788	18.3925	1.6416	7.4768e-06	0.00030878
Cluster-34894.26316	36.9673	10.2211	1.6415	0.000204	0.0046858
Cluster-34894.28464	281.183	86.133	1.6414	1.226e-09	1.6436e-07
Cluster-34894.92552	174.368	53.0083	1.6412	1.4088e-08	1.422e-06
Cluster-34894.34327	240.546	73.6532	1.641	4.2288e-10	6.4978e-08
Cluster-34894.76196	78.239	23.0456	1.6406	2.3288e-06	0.0001154
Cluster-34894.11728	86.6979	25.5445	1.6404	3.258e-06	0.00015214
Cluster-34894.62964	394.433	118.757	1.6396	1.2491e-07	9.4164e-06
Cluster-34894.89256	316.758	88.4771	1.6392	0.00014572	0.0035837
Cluster-34894.81166	600.865	185.494	1.639	4.8364e-11	9.6917e-09
Cluster-34894.47355	230.432	70.4444	1.639	4.811e-09	5.451e-07
Cluster-16718.0	33.6156	9.04086	1.6385	0.00044916	0.0088247
Cluster-34894.94175	103.835	30.7174	1.6384	4.1119e-06	0.00018569
Cluster-34894.82747	503.769	157.4	1.6367	2.6572e-14	1.1989e-11
Cluster-34894.76742	90.5686	27.2181	1.6367	3.8404e-07	2.4574e-05
Cluster-34894.45427	4289.39	1355.54	1.6366	4.8359e-22	9.2245e-19
Cluster-34894.33039	52.9293	14.7938	1.6364	0.0002126	0.0048438
Cluster-34894.61254	7831.96	2384.51	1.6359	2.1154e-08	2.0317e-06
Cluster-34894.12301	59.4795	16.9152	1.6358	8.389e-05	0.0022821
Cluster-34894.78970	72.8555	21.5382	1.6347	5.4396e-06	0.0002354
Cluster-33505.0	49.0668	13.8978	1.6346	0.00010967	0.0028428
Cluster-34894.92237	65.3077	19.2292	1.6345	8.5482e-06	0.000346
Cluster-34894.14199	167.864	51.6807	1.6339	1.7287e-09	2.2304e-07
Cluster-34894.44658	110.055	30.3575	1.6339	0.00032272	0.0067721
Cluster-25267.0	42.5642	12.1124	1.6332	7.6624e-05	0.0021215
Cluster-34894.103235	135.625	41.364	1.633	1.8845e-08	1.8405e-06
Cluster-34894.20340	75.044	22.4014	1.6329	2.076e-06	0.00010484
Cluster-34894.99324	33.5266	9.12641	1.6329	0.00038479	0.0078078
Cluster-34894.92978	448.545	138.551	1.6325	3.0579e-10	4.8506e-08
Cluster-34894.29132	63.8333	18.0993	1.6324	0.00012948	0.0032521
Cluster-34894.24982	85.6499	25.2879	1.6321	9.0043e-06	0.00035944
Cluster-34894.78847	33.3368	9.21196	1.6321	0.00028579	0.0061523
Cluster-34894.85261	149.826	44.7023	1.6312	1.2879e-06	6.9837e-05
Cluster-34894.101694	349.745	109.492	1.6307	1.021e-12	3.2254e-10
Cluster-34894.60314	3350.64	1061.24	1.6301	1.468e-19	2.1478e-16
Cluster-19097.0	95.5448	27.8348	1.6299	2.7778e-05	0.00092425
Cluster-34894.33051	67.6294	19.4368	1.6299	7.2245e-05	0.0020161
Cluster-34894.43748	68.9508	20.48	1.6297	5.5618e-06	0.00024029
Cluster-34894.97033	64.9839	18.5169	1.6293	0.00010212	0.0026801
Cluster-34894.104524	54.5533	15.8369	1.6284	3.2543e-05	0.0010481
Cluster-34894.49997	953.784	293.185	1.6281	9.7171e-09	1.0233e-06
Cluster-34894.83751	140.951	43.3582	1.628	8.0545e-09	8.6389e-07
Cluster-34894.97028	337.491	104.913	1.6279	1.2917e-10	2.29e-08
Cluster-34894.42266	1002.13	317.232	1.627	3.0356e-17	2.6909e-14
Cluster-34894.85989	168.559	52.0368	1.6268	1.3387e-09	1.7775e-07
Cluster-34894.14312	66.5426	19.686	1.6267	8.6584e-06	0.00034957
Cluster-30681.0	61.4981	17.9194	1.6265	2.1729e-05	0.00075516
Cluster-34894.24417	77.1838	23.1916	1.6264	1.0231e-06	5.7206e-05
Cluster-34894.77477	69.2347	19.7125	1.626	8.5497e-05	0.0023193
Cluster-34894.16016	41.9619	11.6053	1.6254	0.00037675	0.0076909
Cluster-34894.81836	549.91	173.912	1.6245	1.7826e-15	1.0535e-12
Cluster-18203.0	82.0949	24.2724	1.6244	6.8554e-06	0.00028688
Cluster-34894.95617	122.049	36.2201	1.6238	8.6713e-06	0.00034995
Cluster-34894.14337	43.4149	12.13	1.6236	0.00026715	0.0058252
Cluster-34894.82214	45.3875	13.0548	1.6232	6.4189e-05	0.0018313
Cluster-34894.36188	150.168	45.7781	1.6231	7.3405e-08	5.9153e-06
Cluster-34894.56999	193.82	59.9566	1.6229	4.1272e-09	4.7805e-07
Cluster-34894.79162	110.514	32.8706	1.6217	6.1197e-06	0.00026007
Cluster-34894.97987	655.306	206.456	1.6216	9.5886e-13	3.042e-10
Cluster-34894.99295	163.394	49.5177	1.6204	3.7328e-07	2.3998e-05
Cluster-34894.83682	60.2099	17.7885	1.6197	1.8441e-05	0.00065742
Cluster-34894.49080	1101.55	348.958	1.6195	1.2239e-14	6.0074e-12
Cluster-34894.77674	127.52	39.3342	1.6194	4.979e-08	4.2221e-06
Cluster-34894.50344	211.917	66.1738	1.6192	5.1103e-10	7.6703e-08
Cluster-34894.12093	131.108	39.6463	1.6186	6.9293e-07	4.0917e-05
Cluster-34894.82991	817.69	258.545	1.6184	9.2987e-14	3.6972e-11
Cluster-34894.50774	43.4986	12.0419	1.6181	0.00048977	0.009455
Cluster-34894.52311	153.048	47.1483	1.617	8.3567e-08	6.6106e-06
Cluster-34894.81176	1926.49	609.408	1.6168	2.5551e-13	9.2114e-11
Cluster-34894.17971	40.9469	11.5876	1.6168	0.00023089	0.0051783
Cluster-34894.12112	103.782	31.017	1.6164	9.4803e-06	0.00037515
Cluster-34894.109762	244.638	74.8411	1.6161	2.1097e-07	1.4766e-05
Cluster-34894.28809	49.944	14.0438	1.6161	0.00020209	0.0046509
Cluster-34894.9314	84.2104	25.2753	1.6159	6.4736e-06	0.00027334
Cluster-34894.85432	57.1097	16.8775	1.6159	2.6197e-05	0.00088238
Cluster-34894.12230	155.011	47.9511	1.6155	8.873e-09	9.4429e-07
Cluster-34894.26884	61.3165	18.1245	1.6155	1.3711e-05	0.0005113
Cluster-34894.100359	215.285	67.7868	1.6149	2.0578e-11	4.5737e-09
Cluster-34894.67421	95.8139	28.3368	1.6149	2.408e-05	0.00082377
Cluster-34894.99094	36.6554	10.1419	1.614	0.00050968	0.0097581
Cluster-34894.17019	34.1893	9.53161	1.6139	0.00040268	0.0080845
Cluster-34894.83417	41.3532	11.5788	1.6136	0.00027029	0.0058766
Cluster-34894.59730	61.1774	17.5281	1.613	0.00015909	0.0038388
Cluster-34894.70226	141.426	43.5432	1.6128	2.8616e-07	1.9174e-05
Cluster-34894.16738	267.684	84.6417	1.6116	1.8296e-11	4.1028e-09
Cluster-34894.9945	92.7471	28.0248	1.6115	2.5338e-06	0.00012345
Cluster-34894.58726	771.979	242.372	1.6114	2.5622e-10	4.1606e-08
Cluster-34894.11573	35.7041	10.1054	1.6111	0.00024068	0.0053477
Cluster-34894.27841	205.5	57.5544	1.6111	0.00034041	0.0070703
Cluster-34894.92951	231.368	72.4817	1.611	5.791e-10	8.5723e-08
Cluster-34894.88440	263.239	78.5755	1.6107	1.1485e-05	0.00044093
Cluster-34894.56954	229.846	69.8645	1.6105	1.0709e-06	5.9463e-05
Cluster-34894.21077	42.2646	12.101	1.6103	0.00015424	0.0037458
Cluster-34894.43032	331.898	104.595	1.61	5.755e-11	1.1322e-08
Cluster-34894.75748	176.842	55.0163	1.61	3.428e-08	3.064e-06
Cluster-34894.76897	56.1892	16.6448	1.6099	2.2007e-05	0.00076289
Cluster-34894.15883	66.34	19.3399	1.6094	9.8063e-05	0.0025966
Cluster-34894.68037	1629.39	518.396	1.6093	2.8968e-13	1.0369e-10
Cluster-34894.19496	396.633	125.821	1.6092	5.8767e-12	1.4934e-09
Cluster-34894.61652	271.297	85.2771	1.6082	5.1908e-10	7.7601e-08
Cluster-34894.70289	57.0071	16.9844	1.6081	1.5449e-05	0.00056756
Cluster-34894.21481	54.963	15.8697	1.6071	0.00011095	0.002871
Cluster-34894.14045	54.6433	16.1138	1.6067	4.512e-05	0.00137
Cluster-34894.33876	71.2593	21.6879	1.6064	2.5151e-06	0.00012266
Cluster-34894.13130	56.5759	16.8524	1.6062	2.6331e-05	0.00088609
Cluster-34894.78744	109.125	30.8268	1.6058	0.0003245	0.0068032
Cluster-34894.14435	56.321	16.3176	1.6057	0.00011712	0.0029913
Cluster-34894.70309	128.648	40.1283	1.6056	2.924e-08	2.6819e-06
Cluster-34894.52985	134.102	39.9472	1.6054	1.7925e-05	0.00064184
Cluster-34894.68018	6967.15	2162.5	1.6042	9.7788e-08	7.5812e-06
Cluster-16764.0	44.5815	12.632	1.6038	0.0002966	0.0063247
Cluster-34894.10033	45.6283	13.0423	1.6037	0.00023951	0.0053289
Cluster-34894.101654	101.912	31.2335	1.6028	8.8458e-07	5.0302e-05
Cluster-34894.51934	2098.18	675.723	1.6026	8.9891e-17	7.1672e-14
Cluster-34894.91173	1182.44	379.004	1.6025	3.7593e-14	1.6373e-11
Cluster-34894.90297	315.005	99.6194	1.6025	1.7034e-10	2.9136e-08
Cluster-34894.30100	90.9834	28.0713	1.6018	7.2985e-07	4.2696e-05
Cluster-34894.101572	428.971	135.362	1.6009	2.6581e-09	3.2539e-07
Cluster-34894.63262	33.9357	9.51396	1.6007	0.0005062	0.0096987
Cluster-34894.38742	63.9	18.4944	1.6004	0.00021978	0.0049773
Cluster-34894.67786	435.268	139.257	1.6003	8.5707e-13	2.7421e-10
Cluster-34894.68396	321.982	102.258	1.6002	1.7334e-10	2.9616e-08
Cluster-34894.47664	279.188	87.8291	1.5997	2.4811e-09	3.0572e-07
Cluster-34671.1	91.8637	28.3984	1.5997	6.6037e-07	3.9225e-05
Cluster-34894.13896	124.067	38.6674	1.5985	1.7392e-07	1.2504e-05
Cluster-34894.72144	93.3893	27.9204	1.5984	3.6726e-05	0.0011593
Cluster-34894.28260	36.1494	10.3067	1.598	0.00038829	0.0078593
Cluster-34894.78905	146.817	45.1062	1.5979	1.6365e-06	8.5599e-05
Cluster-34894.62093	100.97	31.3328	1.5978	2.3444e-07	1.6175e-05
Cluster-34894.87632	52.9196	15.74	1.5978	4.5631e-05	0.0013819
Cluster-34894.10279	278.555	88.4973	1.5975	2.792e-10	4.4902e-08
Cluster-34894.19204	315.481	100.661	1.5974	2.3375e-11	5.0976e-09
Cluster-34894.69926	760.623	243.595	1.5972	2.8764e-12	8.0507e-10
Cluster-34894.63873	1476.33	465.868	1.5972	4.5196e-09	5.1832e-07
Cluster-34894.5705	50.3402	14.9158	1.5967	4.3153e-05	0.0013237
Cluster-34894.89700	233.452	73.6884	1.5966	5.2025e-09	5.855e-07
Cluster-34894.101006	224.478	69.9423	1.5966	2.5884e-07	1.7581e-05
Cluster-34894.26268	137.631	43.0827	1.5965	1.1412e-07	8.7031e-06
Cluster-34894.49854	85.2509	26.1713	1.5961	1.7433e-06	9.042e-05
Cluster-34894.76583	70.7186	21.5784	1.5958	4.7489e-06	0.00020968
Cluster-34894.30408	60.5646	18.0515	1.5956	2.791e-05	0.00092687
Cluster-34894.29020	118.985	37.3839	1.5953	3.6007e-08	3.1899e-06
Cluster-34894.92236	43.6324	12.6106	1.5951	0.00024554	0.0054325
Cluster-34894.102338	142.592	44.7512	1.595	9.3515e-08	7.2866e-06
Cluster-34894.20197	72.6721	21.7384	1.595	2.2925e-05	0.00078965
Cluster-34894.14620	53.6598	15.7388	1.5948	0.00012214	0.0030955
Cluster-34894.46732	88.0654	27.0798	1.5947	2.5735e-06	0.0001249
Cluster-34894.100360	688.521	221.301	1.5942	9.1341e-13	2.9039e-10
Cluster-4270.2	50.6703	14.5836	1.5942	0.00023409	0.0052338
Cluster-34894.93280	167.343	51.3688	1.5941	3.3383e-06	0.00015522
Cluster-34894.50036	368.928	118.237	1.5938	3.4064e-12	9.2994e-10
Cluster-34894.29409	41.4183	12.1124	1.5936	0.00012923	0.003249
Cluster-34894.68963	68.4366	20.8424	1.5934	9.6407e-06	0.00038011
Cluster-34894.86756	89.9518	27.2434	1.5934	1.7055e-05	0.00061603
Cluster-34894.88450	137.317	42.8412	1.5933	1.6985e-07	1.2282e-05
Cluster-34894.78440	153.619	46.0399	1.5929	2.5795e-05	0.00087215
Cluster-34894.37859	335.708	106.1	1.5925	1.8105e-08	1.7762e-06
Cluster-34894.46965	45.1235	13.1164	1.5918	0.00018932	0.0044196
Cluster-34894.96661	667.63	212.46	1.5917	1.0871e-09	1.4853e-07
Cluster-34894.50866	200.512	63.773	1.5914	1.9407e-09	2.4721e-07
Cluster-34894.24435	74.3	22.6531	1.591	9.3206e-06	0.0003701
Cluster-34894.58445	171.06	54.1407	1.5908	1.7739e-08	1.7471e-06
Cluster-34894.100353	119.965	36.7386	1.5907	3.9151e-06	0.00017792
Cluster-34894.42514	697.4	217.158	1.5898	5.5408e-07	3.3858e-05
Cluster-34894.74164	172.985	55.2065	1.5895	4.0712e-10	6.2859e-08
Cluster-34894.41407	65.3017	19.8672	1.5895	9.7632e-06	0.00038464
Cluster-34894.13456	68.8413	20.8752	1.589	1.5839e-05	0.0005796
Cluster-34894.22305	163.273	50.7207	1.5888	8.373e-07	4.8085e-05
Cluster-34894.91344	185.162	58.1494	1.5885	2.205e-07	1.534e-05
Cluster-34894.80661	47.2575	13.9859	1.5883	8.5245e-05	0.0023129
Cluster-24547.1	105.196	33.1045	1.5877	1.0158e-07	7.8462e-06
Cluster-34894.31878	216.643	69.1205	1.5874	2.1268e-09	2.6797e-07
Cluster-34894.91568	100.535	30.8887	1.5871	7.1178e-06	0.00029589
Cluster-34894.50261	59.2762	17.8188	1.5871	4.7169e-05	0.0014188
Cluster-34894.90063	700.916	226.863	1.5867	2.4132e-13	8.8482e-11
Cluster-34894.62579	65.5513	19.0128	1.5867	0.00028711	0.0061721
Cluster-34894.34898	91.3456	28.328	1.5864	1.4844e-06	7.8599e-05
Cluster-34894.9913	37.5448	10.7219	1.5863	0.00044906	0.0088239
Cluster-34894.26861	314.621	101.469	1.5859	1.8199e-11	4.0925e-09
Cluster-34894.14910	106.102	32.8592	1.5858	3.2524e-06	0.00015197
Cluster-35241.0	78.2897	23.4319	1.5849	7.9029e-05	0.0021748
Cluster-34894.33114	284.782	91.9976	1.5845	5.9844e-12	1.5142e-09
Cluster-34894.78657	730.861	233.983	1.5843	8.8217e-10	1.2412e-07
Cluster-34894.66806	220.266	69.9614	1.5843	1.0445e-08	1.0915e-06
Cluster-34894.80043	36.2529	10.3218	1.5842	0.00046045	0.0089972
Cluster-34894.99149	127.665	39.8351	1.5841	1.4562e-06	7.7343e-05
Cluster-34894.73250	82.9261	25.6126	1.584	2.4086e-06	0.00011842
Cluster-34894.15997	47.3951	13.9734	1.584	0.00013384	0.0033449
Cluster-34894.36182	36.072	10.4011	1.5838	0.00032487	0.006808
Cluster-34894.85774	254.612	79.6856	1.5834	6.2017e-07	3.7234e-05
Cluster-34894.72765	432.975	138.708	1.5831	1.2709e-09	1.6963e-07
Cluster-34894.40318	194.257	60.4712	1.5826	1.2541e-06	6.8248e-05
Cluster-34894.36671	690.356	221.409	1.5825	5.3398e-10	7.9435e-08
Cluster-22706.0	43.825	12.5187	1.5825	0.00052085	0.0099338
Cluster-34894.33930	37.3916	10.6552	1.5819	0.00048217	0.0093331
Cluster-34894.101377	361.532	117.123	1.5813	5.7286e-12	1.4681e-09
Cluster-34894.36187	104.085	32.5546	1.5811	1.1242e-06	6.1955e-05
Cluster-34894.8368	66.2024	19.6091	1.5809	0.00013155	0.0032934
Cluster-34894.85540	279.825	90.523	1.5807	6.3201e-12	1.5847e-09
Cluster-34894.73824	152.014	47.9195	1.5803	3.8993e-07	2.4909e-05
Cluster-34894.42545	384.789	125.078	1.5792	2.3794e-12	6.8037e-10
Cluster-34894.90294	272.764	87.468	1.579	8.9127e-10	1.2517e-07
Cluster-34894.60188	920.378	301.896	1.5785	6.7667e-17	5.5418e-14
Cluster-34894.28084	158.044	50.2828	1.5782	5.377e-08	4.504e-06
Cluster-34894.77905	395.779	128.266	1.5776	7.9652e-12	1.9486e-09
Cluster-34894.84262	1400.69	453.869	1.5768	3.6156e-11	7.5778e-09
Cluster-34894.66591	736.285	236.98	1.5768	1.1135e-09	1.5185e-07
Cluster-34894.12140	47.6824	13.908	1.5766	0.000348	0.0071987
Cluster-34894.104612	137.684	43.99	1.5763	2.2666e-08	2.1577e-06
Cluster-34894.43341	410.535	128.753	1.5761	8.3375e-07	4.7936e-05
Cluster-34894.54219	626.31	204.148	1.5759	1.4193e-12	4.2947e-10
Cluster-34894.22707	79.4875	24.5669	1.5755	1.1558e-05	0.00044308
Cluster-34894.81215	58.9866	18.1031	1.5754	2.0712e-05	0.00072584
Cluster-34894.61733	274.216	88.604	1.5752	8.0021e-10	1.1408e-07
Cluster-34894.29553	50.625	14.6629	1.5747	0.00041882	0.0083484
Cluster-34894.82205	73.0352	22.1787	1.5738	2.9376e-05	0.00096316
Cluster-34894.97722	193.212	61.7283	1.5734	3.6049e-08	3.1899e-06
Cluster-34894.55285	278.412	90.4865	1.5729	6.2804e-11	1.218e-08
Cluster-34894.79588	70.6515	21.7535	1.5725	1.9602e-05	0.00069244
Cluster-34894.64699	245.374	77.2518	1.5721	1.2595e-06	6.847e-05
Cluster-34894.48722	54.3994	16.3	1.5721	9.5918e-05	0.0025488
Cluster-34894.48138	105.843	32.6337	1.572	2.0166e-05	0.00070913
Cluster-34894.17385	45.7806	13.5619	1.572	0.00015699	0.0037998
Cluster-34894.17317	459.752	148.99	1.5718	2.2799e-10	3.7471e-08
Cluster-34894.87616	85.5014	25.7272	1.5718	0.00011404	0.0029312
Cluster-34894.43138	54.4041	16.2282	1.5716	0.00013605	0.003391
Cluster-24315.0	115.373	36.1972	1.5713	2.2543e-06	0.00011237
Cluster-34894.98654	49.5849	14.8819	1.5711	0.00012643	0.0031897
Cluster-34894.37812	129.119	41.228	1.5709	5.9208e-08	4.8943e-06
Cluster-25895.1	39.1064	11.4958	1.5701	0.00030451	0.0064586
Cluster-34894.44752	925.469	305.176	1.5694	5.9884e-16	3.958e-13
Cluster-34894.33877	304.133	97.4678	1.5694	2.075e-08	1.9972e-06
Cluster-34894.87312	282.185	92.1575	1.5691	1.2239e-11	2.8773e-09
Cluster-34894.93797	103.317	32.0967	1.5691	6.1917e-06	0.00026254
Cluster-34894.41275	98.6558	30.6495	1.569	9.2e-06	0.00036629
Cluster-34894.56257	444.765	135.949	1.5687	3.4983e-05	0.0011127
Cluster-34894.49819	158.314	48.0985	1.5687	7.0874e-05	0.001985
Cluster-34894.71045	1099.63	332.088	1.5687	8.8312e-05	0.0023841
Cluster-34894.78864	68.0319	20.9858	1.5686	1.7251e-05	0.00062178
Cluster-34894.15714	38.033	11.2492	1.5684	0.00029259	0.0062674
Cluster-34894.10975	116.368	36.5233	1.5682	3.6291e-06	0.0001669
Cluster-34894.19440	40.6152	11.799	1.568	0.00052114	0.0099371
Cluster-34894.29152	380.863	123.873	1.5679	2.7166e-10	4.3878e-08
Cluster-34894.27742	68.6106	19.9818	1.5678	0.00035546	0.0073257
Cluster-34894.61859	124.087	39.7231	1.5676	8.7492e-08	6.8848e-06
Cluster-34894.5825	45.662	13.8299	1.567	8.7266e-05	0.0023618
Cluster-34894.90947	63.8484	19.6244	1.5668	2.6544e-05	0.00089087
Cluster-34894.58468	737.741	244.221	1.5666	2.1889e-17	2.0113e-14
Cluster-34894.101380	63.3577	19.4784	1.5662	2.2545e-05	0.00077851
Cluster-34894.74194	213.778	69.2704	1.5661	3.5078e-09	4.1329e-07
Cluster-34894.104730	109.111	34.7516	1.5661	1.5825e-07	1.1582e-05
Cluster-34894.45376	699.125	226.623	1.5646	2.7449e-09	3.3304e-07
Cluster-34894.74374	502.874	162.605	1.5643	5.7572e-09	6.4123e-07
Cluster-34894.64781	140.582	44.9476	1.5634	1.784e-07	1.2777e-05
Cluster-34894.76815	214.815	69.4957	1.5633	1.1139e-08	1.1568e-06
Cluster-34894.2545	42.2721	12.4571	1.5629	0.00039765	0.0080026
Cluster-34894.37097	166.523	53.484	1.5628	8.1032e-08	6.4431e-06
Cluster-34894.30338	47.672	14.137	1.5623	0.00029578	0.0063144
Cluster-34894.34758	434.731	143.186	1.5618	1.5969e-12	4.7464e-10
Cluster-34894.81721	123.885	39.8954	1.5618	8.786e-08	6.903e-06
Cluster-34894.71496	65.7461	20.5681	1.5618	6.8083e-06	0.00028507
Cluster-34894.89826	33.6433	9.85872	1.5615	0.00046729	0.0091049
Cluster-34894.41359	4786.54	1550.51	1.5609	9.0942e-09	9.6442e-07
Cluster-34894.75951	91.1052	28.5067	1.5609	1.1383e-05	0.00043782
Cluster-34894.95951	148.652	47.1585	1.5603	9.8878e-07	5.5536e-05
Cluster-34894.82896	51.2507	15.6016	1.5603	0.00010889	0.0028266
Cluster-34894.9679	37.0891	10.844	1.5603	0.0005113	0.0097825
Cluster-34894.26520	50.919	15.4254	1.5598	0.00011019	0.0028551
Cluster-34894.99832	238.365	77.9663	1.5596	6.5326e-10	9.5482e-08
Cluster-34894.46510	143.071	44.9615	1.5593	8.4886e-06	0.00034426
Cluster-34894.25747	219.272	71.7366	1.558	1.8929e-10	3.1978e-08
Cluster-34894.18055	189.747	61.8439	1.558	6.3334e-09	6.9512e-07
Cluster-34894.98975	321.314	103.907	1.5573	6.8352e-08	5.5428e-06
Cluster-34894.101009	120.707	38.2659	1.5572	4.0173e-06	0.00018199
Cluster-34894.69077	717.073	234.212	1.5571	1.0526e-09	1.4433e-07
Cluster-34894.97238	348.269	104.895	1.557	0.00018632	0.0043702
Cluster-34894.68013	1994.38	651.115	1.5568	1.6137e-09	2.1e-07
Cluster-34894.32862	402.557	129.046	1.5568	3.3117e-07	2.1698e-05
Cluster-34894.23891	227.533	73.1512	1.5567	1.3588e-07	1.0152e-05
Cluster-34894.40116	81.907	25.8126	1.556	9.4547e-06	0.00037435
Cluster-34894.97621	55.4675	16.9618	1.5557	0.00011613	0.0029736
Cluster-34894.56266	2481.37	807.82	1.5553	8.6735e-09	9.2566e-07
Cluster-34894.73042	62.9281	19.4508	1.5551	5.3002e-05	0.0015661
Cluster-34894.26911	49.165	15.1536	1.5545	6.189e-05	0.0017748
Cluster-34894.61974	7751.17	2532.19	1.5543	2.9283e-09	3.5217e-07
Cluster-34894.50062	1086.54	356.297	1.554	7.3356e-10	1.0588e-07
Cluster-34894.81154	44.077	13.4487	1.5538	0.00011497	0.0029491
Cluster-34894.31051	255.346	79.7118	1.5533	1.9391e-05	0.00068625
Cluster-34894.97905	231.674	73.9363	1.5532	8.9778e-07	5.1014e-05
Cluster-25895.0	65.4424	19.9717	1.5532	0.00013952	0.0034608
Cluster-34894.73498	157.507	51.2504	1.5531	1.7916e-08	1.7612e-06
Cluster-34894.23551	251.227	83.0939	1.5525	1.2751e-11	2.9837e-09
Cluster-34894.105318	144.07	45.8624	1.5523	3.4557e-06	0.00015979
Cluster-34894.67235	738.83	245.92	1.5521	2.2483e-14	1.0298e-11
Cluster-34894.64976	573.208	191.276	1.5517	6.4531e-16	4.1736e-13
Cluster-34894.82666	858.608	283.317	1.5517	6.252e-11	1.2141e-08
Cluster-34894.25646	222.854	73.4995	1.551	1.4759e-10	2.5771e-08
Cluster-13705.2	132.883	43.1934	1.551	3.9513e-08	3.4558e-06
Cluster-34894.99967	363.225	118.29	1.5508	1.2727e-08	1.3056e-06
Cluster-34894.96730	292.892	95.988	1.5507	3.4638e-09	4.0901e-07
Cluster-34894.78962	323.594	106.592	1.5499	2.9505e-10	4.7201e-08
Cluster-34894.13287	480.771	158.407	1.5495	5.0517e-10	7.6126e-08
Cluster-34894.98656	303.537	99.2115	1.5495	4.9176e-09	5.5593e-07
Cluster-34894.7376	125.594	38.5501	1.5493	0.00011981	0.0030466
Cluster-34894.13361	107.864	33.7186	1.5487	2.4629e-05	0.00083952
Cluster-34894.12749	65.793	20.5102	1.5481	3.9867e-05	0.0012408
Cluster-34894.74807	45.7387	13.9092	1.548	0.00022656	0.005098
Cluster-34894.41995	236.974	78.2332	1.5479	1.2066e-10	2.1595e-08
Cluster-34894.6051	124.752	40.4566	1.5478	1.9119e-07	1.3527e-05
Cluster-34894.13077	39.3576	11.8355	1.5475	0.00029437	0.0062949
Cluster-34894.23168	200.708	65.6064	1.546	1.5417e-08	1.5376e-06
Cluster-34894.58131	96.0154	30.988	1.546	4.1866e-07	2.6484e-05
Cluster-34894.49305	224.956	73.2531	1.545	5.9039e-08	4.8838e-06
Cluster-34894.26738	128.501	41.8887	1.5449	1.3003e-07	9.744e-06
Cluster-34894.88024	127.17	41.4495	1.5446	5.8334e-08	4.8353e-06
Cluster-34894.22805	191.712	60.1677	1.5437	3.6239e-05	0.0011473
Cluster-34894.31620	88.0008	27.982	1.5436	5.5841e-06	0.00024111
Cluster-34894.76152	229.036	75.0108	1.5435	3.34e-08	2.9995e-06
Cluster-34894.16208	503.682	168.591	1.5432	1.2164e-13	4.7365e-11
Cluster-34894.104592	335.808	112.161	1.5428	7.9571e-13	2.5622e-10
Cluster-34894.55304	146.939	47.7071	1.5428	3.9711e-07	2.5314e-05
Cluster-34894.70508	690.054	228.953	1.5423	1.0859e-10	1.9692e-08
Cluster-34894.17721	48.782	15.0555	1.5423	0.00010102	0.0026595
Cluster-34894.79660	260.286	82.7268	1.5419	7.3307e-06	0.00030332
Cluster-34894.97154	374.689	114.641	1.5419	0.00018863	0.0044079
Cluster-34894.39252	314.893	103.308	1.5415	2.3474e-08	2.2192e-06
Cluster-34894.53033	702.892	234.653	1.5409	6.829e-12	1.701e-09
Cluster-34894.59983	58.1983	18.0717	1.5408	8.2006e-05	0.0022412
Cluster-34894.58722	2613.65	872.825	1.5406	4.1704e-12	1.1045e-09
Cluster-34894.62878	401.136	133.487	1.5406	3.566e-11	7.5073e-09
Cluster-34894.105123	104.748	33.545	1.5404	4.639e-06	0.00020561
Cluster-34894.84252	300.879	100.15	1.5403	1.0279e-10	1.8775e-08
Cluster-34894.17606	165.908	54.7547	1.5401	5.3056e-09	5.9444e-07
Cluster-34894.79039	256.28	84.667	1.5398	2.018e-09	2.5619e-07
Cluster-34894.94029	1014.79	337.494	1.5393	1.2917e-10	2.29e-08
Cluster-34894.79358	57.9597	18.0603	1.5392	7.0253e-05	0.0019696
Cluster-34894.24887	135.088	43.5899	1.5391	1.3772e-06	7.3988e-05
Cluster-34894.7442	58.1401	17.9924	1.5387	0.00010013	0.0026402
Cluster-34894.19495	105.744	33.8935	1.5383	7.2601e-06	0.00030098
Cluster-34894.60078	470.536	157.316	1.5379	2.3278e-11	5.0839e-09
Cluster-34894.81283	65.6076	20.519	1.537	5.8742e-05	0.0017019
Cluster-34894.67375	419.316	139.84	1.5363	4.9184e-11	9.8168e-09
Cluster-34894.17880	72.363	22.8985	1.5352	1.5325e-05	0.00056381
Cluster-34894.101808	163.487	53.8788	1.5345	5.7879e-08	4.8023e-06
Cluster-34894.61730	2065.88	681.693	1.5344	2.4073e-08	2.2701e-06
Cluster-34894.92097	88.9296	28.2413	1.534	1.437e-05	0.00053243
Cluster-34894.37325	141.924	46.7784	1.5338	6.8899e-08	5.5821e-06
Cluster-34894.102600	52.2549	16.3037	1.5338	0.00012265	0.0031074
Cluster-34894.64310	469.177	156.964	1.5337	7.8701e-11	1.4862e-08
Cluster-34894.106436	72.1468	23.1426	1.5335	5.9849e-06	0.00025506
Cluster-34894.31267	131.862	43.5483	1.5333	2.1095e-08	2.0274e-06
Cluster-34894.89192	491.02	160.601	1.5333	3.3295e-07	2.1805e-05
Cluster-34894.97957	127.29	41.3261	1.5333	5.8906e-07	3.565e-05
Cluster-34894.59002	501.74	158.085	1.5331	4.1168e-05	0.0012739
Cluster-34894.13286	521.484	174.83	1.533	3.7551e-11	7.8376e-09
Cluster-34894.53349	597.332	201.393	1.5321	2.5171e-13	9.0962e-11
Cluster-34894.80654	60.9335	18.9512	1.532	7.9613e-05	0.0021881
Cluster-34894.34741	257.9	84.3612	1.531	6.4854e-07	3.866e-05
Cluster-34894.26440	93.3205	30.2268	1.531	2.9835e-06	0.00014147
Cluster-34894.12083	494.821	162.093	1.5309	2.2668e-07	1.5733e-05
Cluster-34894.17604	57.511	17.9169	1.5309	0.00013628	0.0033963
Cluster-34894.89022	250.903	81.3262	1.5307	1.4645e-06	7.7682e-05
Cluster-34894.41602	133.988	42.9067	1.5303	1.1671e-05	0.00044656
Cluster-34894.102271	137.356	45.1174	1.5302	1.1565e-07	8.7972e-06
Cluster-34894.49531	41.7186	12.8082	1.5297	0.00024709	0.0054588
Cluster-34894.33109	583.297	197.896	1.5291	3.5476e-15	1.9654e-12
Cluster-34894.83329	82.3932	25.4088	1.5287	0.00015088	0.0036827
Cluster-34894.32998	462.061	156.634	1.5274	1.5943e-14	7.6272e-12
Cluster-34894.49396	510.31	171.6	1.527	3.6795e-11	7.7012e-09
Cluster-34894.72340	109.613	35.986	1.5269	3.8731e-07	2.4752e-05
Cluster-34894.40126	3029.1	1023.98	1.526	1.1998e-12	3.6973e-10
Cluster-34894.55958	301.06	101.682	1.5256	2.4885e-12	7.0623e-10
Cluster-34894.32737	66.2965	20.7192	1.5249	0.00014315	0.0035322
Cluster-34894.242	77.0931	24.3594	1.5248	3.8391e-05	0.0012028
Cluster-34894.98942	50.5595	15.7816	1.5247	0.00016495	0.0039531
Cluster-34894.47289	119.518	39.128	1.5244	1.8312e-06	9.4179e-05
Cluster-34894.43319	103.758	33.7903	1.5241	2.1346e-06	0.0001074
Cluster-34894.98909	49.2409	15.3701	1.5238	0.00015751	0.0038105
Cluster-34894.83050	220.874	73.2593	1.5237	3.3935e-08	3.0403e-06
Cluster-34894.100528	80.0785	26.0555	1.5233	2.4749e-06	0.00012101
Cluster-28677.0	124.361	41.2582	1.5226	8.7716e-08	6.8989e-06
Cluster-34894.97514	93.6153	29.7159	1.5226	4.4573e-05	0.0013572
Cluster-34894.23486	99.9033	32.0891	1.5224	1.0089e-05	0.0003957
Cluster-34894.67896	56.5954	17.9294	1.5221	9.1874e-05	0.0024628
Cluster-34894.99662	190.064	63.3449	1.5218	1.7004e-08	1.6814e-06
Cluster-16853.1	112.228	37.1247	1.5214	2.354e-07	1.6213e-05
Cluster-34894.68720	177.182	59.0607	1.5207	1.9173e-08	1.8701e-06
Cluster-34894.41609	95.9301	31.4901	1.5204	1.4528e-06	7.7224e-05
Cluster-34894.78656	124.158	40.7311	1.5204	1.548e-06	8.1452e-05
Cluster-34894.81982	66.5943	21.1281	1.5202	5.0108e-05	0.0014935
Cluster-34894.17882	469.793	159.466	1.5197	4.4682e-12	1.1731e-09
Cluster-34894.81217	91.496	29.814	1.5194	2.8631e-06	0.00013641
Cluster-34894.102233	58.8658	18.2289	1.5192	0.00023811	0.0053048
Cluster-34894.78941	75.8667	24.3568	1.5191	2.063e-05	0.0007233
Cluster-34894.98763	45.9613	14.1861	1.5191	0.00033801	0.0070295
Cluster-34894.62019	673.588	230.31	1.519	9.2919e-16	5.8343e-13
Cluster-34894.16824	107.009	34.9869	1.5184	1.7425e-06	9.042e-05
Cluster-34894.39141	113.378	37.5425	1.5182	4.8696e-07	3.0211e-05
Cluster-33672.0	74.1993	23.9202	1.5182	1.1066e-05	0.00042693
Cluster-34894.96860	69.693	22.526	1.518	1.105e-05	0.00042641
Cluster-34894.17120	74.2126	23.9404	1.518	1.7927e-05	0.00064184
Cluster-34894.32233	730.941	246.487	1.5171	5.7433e-10	8.5102e-08
Cluster-34894.89488	78.3885	25.6163	1.517	4.1387e-06	0.00018651
Cluster-34894.104660	49.3246	15.5223	1.5169	0.00015178	0.0037
Cluster-34894.61954	2264.13	726.386	1.5167	3.4074e-05	0.0010882
Cluster-34894.22411	277.743	94.1581	1.5166	3.0271e-11	6.4889e-09
Cluster-34894.14080	138.168	45.5567	1.5164	1.4279e-06	7.6194e-05
Cluster-34894.99636	59.6557	18.5032	1.5162	0.00019748	0.0045684
Cluster-34894.30252	370.884	125.509	1.516	9.5522e-11	1.7554e-08
Cluster-34894.36612	259.991	87.4265	1.5156	4.5854e-09	5.245e-07
Cluster-34894.53354	117.114	38.8625	1.5155	2.3886e-07	1.6376e-05
Cluster-34894.32064	113.902	37.0343	1.5155	7.0247e-06	0.00029291
Cluster-34894.97624	68.0511	21.8969	1.5152	2.8013e-05	0.0009292
Cluster-34894.45336	114.349	37.8973	1.5151	2.836e-07	1.9028e-05
Cluster-34894.37236	129.156	41.8409	1.5151	1.8357e-05	0.0006552
Cluster-34894.65890	46.1768	14.5622	1.5151	0.00016352	0.0039237
Cluster-34894.21845	163.496	53.6665	1.5145	2.2362e-06	0.00011173
Cluster-34894.77385	82.1264	25.8769	1.5141	0.00011921	0.0030361
Cluster-34894.96606	294.994	100.118	1.5139	7.9238e-11	1.4945e-08
Cluster-34894.66963	78.6683	25.2855	1.5139	2.648e-05	0.00088972
Cluster-34894.5614	481.692	163.762	1.5134	4.7734e-11	9.6037e-09
Cluster-34894.53997	2312.65	791.798	1.5126	6.8188e-14	2.7999e-11
Cluster-34894.40970	63.8572	20.5492	1.5125	2.7328e-05	0.00091291
Cluster-34894.41957	604.771	205.17	1.512	1.4105e-10	2.4688e-08
Cluster-34894.99918	182.346	61.3292	1.5117	2.019e-08	1.9491e-06
Cluster-34894.12336	58.7711	18.6757	1.5117	9.4413e-05	0.0025155
Cluster-34894.14481	90.3061	29.7675	1.5114	1.8583e-06	9.5413e-05
Cluster-34894.96715	381.44	130.339	1.5112	4.8811e-12	1.266e-09
Cluster-34894.103691	285.258	97.2486	1.5104	1.4128e-11	3.2804e-09
Cluster-34894.14311	93.6638	30.6509	1.5096	9.6041e-06	0.00037877
Cluster-34894.85824	126.649	41.5225	1.5091	8.6952e-06	0.00035054
Cluster-34894.82713	438.373	149.798	1.5072	2.2022e-11	4.8588e-09
Cluster-34894.73276	123.334	39.7031	1.5072	3.9304e-05	0.0012265
Cluster-34894.107577	141.596	47.2377	1.5071	6.3324e-07	3.7867e-05
Cluster-34894.83267	125.421	40.7865	1.5063	1.5224e-05	0.00056051
Cluster-34894.79560	378.986	127.189	1.5057	9.3639e-08	7.2924e-06
Cluster-34894.74896	173.974	58.5736	1.5056	1.1399e-07	8.6974e-06
Cluster-34894.82976	113.788	37.5011	1.5055	3.9789e-06	0.00018033
Cluster-34894.28938	876.521	291.225	1.5052	1.4877e-06	7.869e-05
Cluster-34894.52115	1304.64	427.46	1.5048	1.0911e-05	0.00042182
Cluster-34894.39312	2287.03	772.576	1.5047	1.7332e-08	1.7127e-06
Cluster-34894.46151	1299.65	438.153	1.5043	5.0966e-08	4.2955e-06
Cluster-34894.56151	161.822	53.1732	1.5043	5.215e-06	0.00022703
Cluster-34894.81525	127.632	42.8058	1.5042	1.9823e-07	1.3972e-05
Cluster-34894.45715	78.0757	25.0653	1.5042	8.1732e-05	0.0022353
Cluster-34894.29411	397.964	134.306	1.5039	4.3609e-08	3.7595e-06
Cluster-34894.99654	77.9089	25.3534	1.5037	1.6755e-05	0.00060621
Cluster-34894.83617	249.813	84.4317	1.5035	3.5419e-08	3.1471e-06
Cluster-34894.19990	114.465	38.003	1.5035	3.016e-06	0.00014279
Cluster-34894.33912	47.532	14.9058	1.5033	0.00038987	0.0078787
Cluster-34894.109355	52.6414	16.7303	1.5029	0.00014861	0.0036396
Cluster-34894.95362	164.563	54.5448	1.5028	2.4436e-06	0.00011991
Cluster-34894.67620	137.676	45.6359	1.5028	3.473e-06	0.00016039
Cluster-34894.86397	3157.26	1077.32	1.5027	5.0961e-10	7.6566e-08
Cluster-34894.38069	127.261	41.3402	1.5027	3.2236e-05	0.0010409
Cluster-34894.11711	139.61	45.339	1.5027	3.6339e-05	0.0011499
Cluster-34894.12115	467.253	158.535	1.5026	5.3039e-09	5.9444e-07
Cluster-34894.98548	163.55	52.9846	1.5021	4.2454e-05	0.0013069
Cluster-34894.27701	70.2248	23.0305	1.5009	1.6096e-05	0.00058646

## Sheet: DOWN
gene_id	DECENT_readcount	CON_readcount	log2FoldChange	pval	padj
Cluster-34894.22342	6.20082	378.935	-5.4311	2.1945e-48	3.0063e-44
Cluster-34894.61287	186.006	1899.65	-3.2383	4.0821e-38	4.3939e-34
Cluster-34894.43094	22.0791	296.956	-3.5864	6.0201e-38	6.048e-34
Cluster-34894.76989	76.2938	620.258	-2.9408	8.1619e-38	7.6872e-34
Cluster-34894.57492	289.359	2635.59	-3.0813	5.1473e-35	3.6937e-31
Cluster-34894.57489	3331.07	15869.3	-2.2106	2.0467e-32	1.2851e-28
Cluster-34894.59625	983.999	7377.73	-2.813	1.0703e-30	5.9736e-27
Cluster-34894.60459	585.623	2890.24	-2.2534	6.2466e-29	2.9417e-25
Cluster-34894.48810	107.632	574.996	-2.3583	5.1643e-28	2.1618e-24
Cluster-34894.49828	31.1656	254.338	-2.9146	1.2494e-27	4.9328e-24
Cluster-34894.53718	449.602	2503.4	-2.4109	4.9685e-27	1.8262e-23
Cluster-34894.67286	23.8047	289.589	-3.4059	1.6932e-26	6.0752e-23
Cluster-34894.48808	32.8672	269.409	-2.915	2.1704e-26	7.4333e-23
Cluster-34894.59865	43.531	296.692	-2.6689	1.7879e-25	5.6131e-22
Cluster-34894.60080	76.2695	578.496	-2.8057	3.1063e-25	9.5532e-22
Cluster-34894.55995	96.8556	498.541	-2.2998	5.5558e-25	1.6132e-21
Cluster-34894.55719	124.091	879.086	-2.7192	6.3545e-25	1.8068e-21
Cluster-34894.67283	73.422	545.338	-2.7765	1.1042e-24	2.9192e-21
Cluster-34894.60278	952.763	3068.03	-1.6629	5.3489e-24	1.3662e-20
Cluster-34894.61986	430.201	1809.92	-2.0272	1.7951e-23	4.363e-20
Cluster-34894.44940	73.3785	590.245	-2.8698	2.615e-23	6.2549e-20
Cluster-34894.37400	59.8833	736.52	-3.3821	3.5046e-23	7.8825e-20
Cluster-34894.55933	103.991	989.194	-3.077	4.7452e-23	1.0363e-19
Cluster-34894.56941	71.1309	366.784	-2.2966	8.0114e-23	1.7247e-19
Cluster-34894.57490	682.081	2353.54	-1.7556	3.6722e-22	7.1866e-19
Cluster-34894.59587	253.441	1243.79	-2.2307	4.6876e-22	9.0563e-19
Cluster-34894.55621	215.614	2058.04	-3.0711	6.4093e-22	1.2073e-18
Cluster-34894.58571	3036.01	15569.1	-2.2856	1.5342e-21	2.7856e-18
Cluster-34894.67848	49.2579	662.612	-3.4651	1.9608e-21	3.4763e-18
Cluster-34894.49745	53.0807	314.737	-2.4752	3.8657e-21	6.7738e-18
Cluster-34894.49263	121.267	570.357	-2.1678	1.3361e-20	2.2623e-17
Cluster-34894.52376	32.4131	221.184	-2.6449	1.9705e-20	3.2631e-17
Cluster-34894.69608	138.598	578.72	-2.0102	1.9591e-20	3.2631e-17
Cluster-34894.76798	43.2698	881.565	-3.8892	3.7945e-20	6.083e-17
Cluster-34894.67595	31.034	222.971	-2.7048	4.9363e-20	7.7487e-17
Cluster-34894.48851	38.1771	246.201	-2.5701	5.7686e-20	8.9618e-17
Cluster-34894.56473	1182.1	6602.34	-2.3894	7.226e-20	1.0999e-16
Cluster-34894.50449	3.96635	118.219	-4.2139	1.1403e-19	1.6847e-16
Cluster-34894.70875	2.92401	97.7056	-4.2803	2.4978e-19	3.551e-16
Cluster-34894.57051	2578.09	11725.2	-2.1185	6.5025e-19	8.2343e-16
Cluster-34894.62520	60.2955	449.935	-2.7443	7.3697e-19	9.1783e-16
Cluster-34894.51335	61.8518	355.602	-2.4216	8.1378e-19	9.9112e-16
Cluster-34894.40251	29.7594	272.577	-2.9903	2.7042e-18	2.9964e-15
Cluster-34894.70529	38.7064	216.714	-2.3836	2.7369e-18	3.0105e-15
Cluster-34894.71060	44.0264	236.518	-2.3307	4.5342e-18	4.7123e-15
Cluster-34894.79692	98.7647	439.478	-2.0883	6.6736e-18	6.8413e-15
Cluster-34894.20117	18.8505	173.976	-2.9856	7.961e-18	7.9448e-15
Cluster-34894.108195	10.3802	106.265	-3.0956	1.8395e-17	1.7111e-14
Cluster-34894.59585	1475.9	5579.57	-1.8692	1.9239e-17	1.7786e-14
Cluster-34894.52934	59.331	291.071	-2.2079	2.7856e-17	2.5287e-14
Cluster-34894.28880	166.121	803.258	-2.1902	2.9041e-17	2.5895e-14
Cluster-34894.55406	41.0253	219.634	-2.3237	3.7893e-17	3.3007e-14
Cluster-34894.50839	99.3023	549.346	-2.3623	5.2584e-17	4.4518e-14
Cluster-34894.58595	1506.8	4570.23	-1.5708	5.9488e-17	4.9592e-14
Cluster-34894.58048	103.98	580.577	-2.3722	6.4791e-17	5.342e-14
Cluster-34894.58647	392.239	2181.57	-2.3665	6.9843e-17	5.6891e-14
Cluster-34894.65039	144.398	516.701	-1.7945	7.2963e-17	5.9114e-14
Cluster-34894.58614	9497.96	44462.2	-2.1457	1.3848e-16	1.0757e-13
Cluster-34894.55994	236.424	1080.15	-2.1126	2.4028e-16	1.7749e-13
Cluster-34894.67574	82.5594	347.357	-2.0063	2.5684e-16	1.8789e-13
Cluster-34894.58724	824.895	3646.27	-2.0698	2.994e-16	2.1484e-13
Cluster-34894.57053	145.79	642.201	-2.0651	3.1837e-16	2.263e-13
Cluster-34894.79117	138.134	451.509	-1.6715	3.4562e-16	2.4338e-13
Cluster-34894.48807	99.0429	387.29	-1.9114	3.5347e-16	2.4775e-13
Cluster-34894.69609	147.102	520.495	-1.7753	3.921e-16	2.7104e-13
Cluster-34894.54542	212.589	1011.44	-2.1643	4.1404e-16	2.8361e-13
Cluster-34894.54754	273.766	1917.32	-2.6434	4.2923e-16	2.9268e-13
Cluster-34894.62000	60.0246	386.56	-2.5419	5.592e-16	3.7123e-13
Cluster-34894.53989	60.4315	480.437	-2.792	6.1408e-16	4.006e-13
Cluster-34894.70874	16.5036	156.682	-2.9895	6.2375e-16	4.0516e-13
Cluster-34894.55720	945.345	5316.03	-2.3733	7.5445e-16	4.8586e-13
Cluster-34894.58075	2307.28	8652.91	-1.8526	9.7572e-16	6.101e-13
Cluster-34894.22343	150.441	1457.2	-3.0127	1.0982e-15	6.8386e-13
Cluster-34894.64753	27.7169	197.475	-2.6559	1.808e-15	1.0601e-12
Cluster-34894.66960	39.0583	179.121	-2.1128	1.8045e-15	1.0601e-12
Cluster-34894.19560	323.767	1160.58	-1.7926	2.1054e-15	1.2297e-12
Cluster-34894.58140	585.183	2238	-1.8773	2.1488e-15	1.2503e-12
Cluster-34894.61459	193.738	1074.92	-2.3533	2.1664e-15	1.2556e-12
Cluster-34894.34494	89.1197	341.543	-1.8805	2.9382e-15	1.6521e-12
Cluster-34894.56382	99.4854	371.617	-1.8476	3.2171e-15	1.7955e-12
Cluster-34894.57438	928.512	4552.02	-2.1957	4.4698e-15	2.4143e-12
Cluster-34894.54640	190.35	683.812	-1.7938	5.0079e-15	2.6856e-12
Cluster-34894.61463	42.7307	511.09	-3.2238	5.1794e-15	2.7579e-12
Cluster-34894.58325	5235.42	17301.8	-1.682	5.2365e-15	2.7785e-12
Cluster-34894.58474	2324.7	12678.8	-2.3283	5.5547e-15	2.9371e-12
Cluster-34894.58326	452.747	1600.61	-1.7714	6.0599e-15	3.193e-12
Cluster-34894.62363	3025.55	11714.5	-1.8912	6.3718e-15	3.334e-12
Cluster-34894.40252	46.3389	344.539	-2.6983	6.862e-15	3.5781e-12
Cluster-34894.54578	110.994	392.506	-1.7728	7.0001e-15	3.6375e-12
Cluster-34894.62698	43.1742	218.982	-2.2407	7.844e-15	4.0481e-12
Cluster-34894.55906	62.5042	297.287	-2.1545	7.8794e-15	4.0525e-12
Cluster-34894.61743	141.003	684.756	-2.1824	8.7102e-15	4.4494e-12
Cluster-34894.75683	65.9548	298.424	-2.0931	9.055e-15	4.579e-12
Cluster-34894.67287	94.9869	459.264	-2.1747	9.128e-15	4.6005e-12
Cluster-34894.58047	622.029	2285.28	-1.8211	1.0742e-14	5.3423e-12
Cluster-34894.63093	29.9977	151.832	-2.2323	1.1502e-14	5.7015e-12
Cluster-34894.58922	552.165	1598.66	-1.5031	1.2073e-14	5.9457e-12
Cluster-34894.55066	182.288	2025.63	-3.1398	1.3008e-14	6.3598e-12
Cluster-34894.59758	590.629	3049.79	-2.2565	1.6053e-14	7.6553e-12
Cluster-34894.76990	124.58	523.507	-1.9962	1.7166e-14	8.1604e-12
Cluster-34894.55631	293.169	1008.87	-1.7346	1.7603e-14	8.3158e-12
Cluster-34894.48817	43.6295	220.984	-2.2339	1.8375e-14	8.5995e-12
Cluster-34894.58818	153.552	803.63	-2.2732	1.8787e-14	8.7108e-12
Cluster-34894.57084	3594.69	14684.6	-1.9587	1.921e-14	8.8798e-12
Cluster-34894.60118	36.3105	194.01	-2.2953	2.3368e-14	1.0639e-11
Cluster-34894.45757	64.8098	265.308	-1.9573	2.6182e-14	1.1848e-11
Cluster-34894.46304	234.059	893.735	-1.8693	2.7381e-14	1.2317e-11
Cluster-34894.41372	1.66956	87.1156	-4.2919	2.769e-14	1.2419e-11
Cluster-34894.59974	665.121	2699.18	-1.9492	2.7962e-14	1.2504e-11
Cluster-14927.0	20.886	132.662	-2.5031	3.9594e-14	1.7145e-11
Cluster-34894.46252	3.44959	82.1667	-3.812	5.1065e-14	2.1924e-11
Cluster-34894.91338	8.35598	128.519	-3.4304	5.1729e-14	2.2145e-11
Cluster-34894.57083	38.3213	229.677	-2.4378	6.1656e-14	2.5525e-11
Cluster-34894.82729	153.508	643.493	-1.988	6.7016e-14	2.7593e-11
Cluster-34894.57082	353.007	1766.16	-2.2126	6.9164e-14	2.8322e-11
Cluster-34894.18027	194.682	739.792	-1.8616	7.2927e-14	2.9702e-11
Cluster-34894.74427	35.5524	173.942	-2.1834	8.7005e-14	3.4777e-11
Cluster-34894.63881	29.4255	162.087	-2.3338	1.153e-13	4.5247e-11
Cluster-34894.51841	79.8846	536.681	-2.5627	1.2436e-13	4.8298e-11
Cluster-34894.58628	218.38	972.611	-2.0638	1.2662e-13	4.9051e-11
Cluster-34894.55487	3622.44	15309.9	-1.9972	1.3901e-13	5.3576e-11
Cluster-34894.63861	48.1998	318.554	-2.5472	1.4717e-13	5.6432e-11
Cluster-34894.34683	121.761	490.039	-1.937	1.6189e-13	6.1763e-11
Cluster-34894.83042	108.138	337.488	-1.5999	1.9428e-13	7.3469e-11
Cluster-34894.50878	604.421	1841.81	-1.5683	2.1638e-13	8.0711e-11
Cluster-34894.64647	406.602	1318.85	-1.6515	2.4616e-13	9.0035e-11
Cluster-34894.54905	114.912	358.91	-1.5994	2.4922e-13	9.0664e-11
Cluster-34894.77954	38.3064	180.632	-2.133	2.667e-13	9.5919e-11
Cluster-34894.51073	48.4371	202.551	-1.9838	2.6796e-13	9.6142e-11
Cluster-34894.51263	121.955	396.89	-1.6564	3.0174e-13	1.075e-10
Cluster-34894.72119	12.0196	124.758	-3.0264	3.4133e-13	1.2046e-10
Cluster-34894.45162	101.252	371.362	-1.8101	3.4592e-13	1.2179e-10
Cluster-34894.57938	94.8135	371.748	-1.8995	3.627e-13	1.2741e-10
Cluster-34894.60496	180.448	703.893	-1.8911	5.1866e-13	1.7564e-10
Cluster-34894.55758	130.805	448.048	-1.7215	5.8975e-13	1.9718e-10
Cluster-34894.70207	122.645	709.406	-2.3782	6.132e-13	2.0399e-10
Cluster-34894.48561	25.185	151.204	-2.417	7.0753e-13	2.328e-10
Cluster-34894.57486	37.4517	256.651	-2.5724	7.6385e-13	2.4808e-10
Cluster-34894.51427	113	385.025	-1.7135	8.3022e-13	2.6665e-10
Cluster-34894.38459	28.7914	181.502	-2.4792	8.6578e-13	2.7642e-10
Cluster-34894.63090	96.6117	315.388	-1.6555	8.7553e-13	2.7894e-10
Cluster-34894.67141	107.94	417.728	-1.8786	9.8805e-13	3.128e-10
Cluster-34894.78855	27.5341	131.764	-2.1485	1.0322e-12	3.254e-10
Cluster-34894.61072	72.0438	341.24	-2.1321	1.1006e-12	3.4268e-10
Cluster-34894.51185	90.5513	360.484	-1.9175	1.1241e-12	3.4926e-10
Cluster-34894.70209	34.0496	204.514	-2.4178	1.2349e-12	3.7979e-10
Cluster-34894.88538	43.5933	172.08	-1.9029	1.3678e-12	4.1473e-10
Cluster-34894.51507	115.262	779.884	-2.5568	1.4371e-12	4.3226e-10
Cluster-34894.55156	619.381	2111.9	-1.7141	1.517e-12	4.5448e-10
Cluster-34894.59552	3178.36	9795.76	-1.5805	1.5375e-12	4.597e-10
Cluster-34894.58301	2786.67	11941	-2.0071	1.5418e-12	4.6008e-10
Cluster-34894.50460	16.1811	97.4851	-2.416	1.7834e-12	5.2388e-10
Cluster-34894.58120	1414.4	6573.9	-2.1082	1.7818e-12	5.2388e-10
Cluster-34894.51437	21.3644	139.597	-2.5165	2.0974e-12	6.0666e-10
Cluster-34894.38460	3.59939	60.4284	-3.4298	2.4279e-12	6.9033e-10
Cluster-34894.55759	7.77786	75.1376	-2.9248	2.5912e-12	7.2987e-10
Cluster-34894.72455	2.05446	49.9304	-3.7044	2.6848e-12	7.5396e-10
Cluster-34894.43916	63.951	214.14	-1.6874	2.8796e-12	8.0507e-10
Cluster-34894.38288	110.076	347.903	-1.6106	2.9067e-12	8.0966e-10
Cluster-34894.62386	538.902	2143.12	-1.9106	3.1242e-12	8.607e-10
Cluster-34894.58896	331.95	1568.62	-2.1264	3.3157e-12	9.0682e-10
Cluster-34894.86204	69.382	408.725	-2.389	3.6582e-12	9.8793e-10
Cluster-34894.53987	53.8162	246.811	-2.0881	3.7694e-12	1.0161e-09
Cluster-34894.60413	9.12484	80.0098	-2.8242	3.9053e-12	1.0453e-09
Cluster-34894.53542	516.317	1806.31	-1.7451	3.9973e-12	1.0624e-09
Cluster-34894.70089	55.7697	199.247	-1.7729	4.2942e-12	1.1294e-09
Cluster-34894.61462	332.358	1879.22	-2.3394	5.071e-12	1.313e-09
Cluster-34894.73870	39.6072	160.673	-1.9319	5.6811e-12	1.4584e-09
Cluster-34894.57339	448.454	1584	-1.7561	6.8083e-12	1.6986e-09
Cluster-34894.58314	179.382	1421.79	-2.7175	7.0606e-12	1.7471e-09
Cluster-34894.87746	18.2594	124.231	-2.5529	8.3952e-12	2.0471e-09
Cluster-34894.88004	82.4823	279.404	-1.7025	8.5879e-12	2.0873e-09
Cluster-34894.68419	29.6981	236.298	-2.7198	8.6154e-12	2.0906e-09
Cluster-34894.63859	148.912	564.227	-1.8467	8.7763e-12	2.1263e-09
Cluster-34894.60904	85.7116	341.636	-1.9117	9.183e-12	2.2106e-09
Cluster-34894.33078	30.7558	139.013	-2.0636	9.5319e-12	2.2909e-09
Cluster-34894.55015	153.687	451.465	-1.5124	9.9143e-12	2.3752e-09
Cluster-34894.69101	24.792	123.427	-2.1828	1.0704e-11	2.5392e-09
Cluster-34894.29040	52.4205	193.138	-1.8112	1.4375e-11	3.3326e-09
Cluster-34894.48772	44.0459	213.189	-2.1472	1.5146e-11	3.49e-09
Cluster-34894.59866	646.179	2156.63	-1.6802	1.578e-11	3.625e-09
Cluster-33544.0	15.0931	158.705	-2.9996	1.677e-11	3.8002e-09
Cluster-34894.70050	51.0864	236.096	-2.0952	1.7999e-11	4.0604e-09
Cluster-34894.59160	62.2814	377.272	-2.4092	1.8223e-11	4.0925e-09
Cluster-34894.56107	30.9544	135.403	-2.0278	1.8742e-11	4.1903e-09
Cluster-34894.65036	87.5797	308.048	-1.7473	2.0941e-11	4.6476e-09
Cluster-34894.73861	187.747	691.233	-1.8059	2.1924e-11	4.8514e-09
Cluster-34894.50863	60.6436	203.656	-1.6906	2.256e-11	4.9558e-09
Cluster-34894.69999	159.066	731.9	-2.0849	2.4605e-11	5.3291e-09
Cluster-34894.72544	22.5134	169.249	-2.648	2.9023e-11	6.2481e-09
Cluster-34894.79693	21.2369	123.454	-2.3613	2.9838e-11	6.4143e-09
Cluster-34894.41486	39.8413	170.932	-1.9988	3.1141e-11	6.6564e-09
Cluster-34894.74539	26.6463	158.637	-2.3845	3.1255e-11	6.6712e-09
Cluster-34894.87065	20.6447	125.17	-2.4095	3.1969e-11	6.7949e-09
Cluster-34894.61664	56.8702	214.974	-1.8371	3.5299e-11	7.4605e-09
Cluster-34894.47234	9.30579	70.053	-2.6319	3.546e-11	7.484e-09
Cluster-34894.70046	36.5724	172.339	-2.1137	3.572e-11	7.5073e-09
Cluster-34894.67987	93.2899	280.277	-1.5428	3.571e-11	7.5073e-09
Cluster-34894.61107	95.9876	292.467	-1.558	3.9584e-11	8.2163e-09
Cluster-34894.67410	95.7494	319.879	-1.6791	4.1234e-11	8.5236e-09
Cluster-34894.57087	163.883	905.936	-2.3001	4.1567e-11	8.5808e-09
Cluster-34894.32683	128.638	395.978	-1.5731	4.2398e-11	8.7045e-09
Cluster-34894.69133	50.953	225.91	-2.0372	4.3217e-11	8.8367e-09
Cluster-34894.6757	82.8146	283.753	-1.7122	4.3218e-11	8.8367e-09
Cluster-34894.59282	11.7131	78.5627	-2.5144	4.4659e-11	9.0943e-09
Cluster-36314.0	28.2497	122.889	-2.0106	4.5885e-11	9.2939e-09
Cluster-34894.59164	107.474	861.23	-2.7075	4.6074e-11	9.307e-09
Cluster-34894.66017	76.0898	247.742	-1.646	4.6072e-11	9.307e-09
Cluster-34894.75104	40.6753	167.646	-1.9485	4.782e-11	9.6083e-09
Cluster-34894.73501	14.261	97.6691	-2.5436	5.7036e-11	1.1235e-08
Cluster-18751.1	4.45289	104.511	-3.5901	5.9424e-11	1.1645e-08
Cluster-34894.59586	48.0972	342.888	-2.5823	5.9606e-11	1.1652e-08
Cluster-34894.32491	19.3581	106.131	-2.2907	5.9613e-11	1.1652e-08
Cluster-34894.39246	82.1865	250.184	-1.5566	6.1054e-11	1.1918e-08
Cluster-34894.58767	218.095	1084.28	-2.1724	6.151e-11	1.1991e-08
Cluster-34894.57210	9.59816	88.0115	-2.8279	6.2142e-11	1.2083e-08
Cluster-34894.49468	47.3913	180.117	-1.8385	6.4202e-11	1.2436e-08
Cluster-34894.44620	44.6357	171.567	-1.8563	6.7383e-11	1.2985e-08
Cluster-34894.61525	235.224	708.457	-1.5425	6.8183e-11	1.3122e-08
Cluster-34894.24563	26.522	130.343	-2.1579	7.0241e-11	1.3501e-08
Cluster-34894.61049	92.0131	303.407	-1.6612	7.0361e-11	1.3507e-08
Cluster-34894.43368	57.944	221.025	-1.8476	7.1881e-11	1.3746e-08
Cluster-34894.35534	56.1942	199.08	-1.7539	7.3648e-11	1.4031e-08
Cluster-34894.56964	26.6825	181.974	-2.533	7.7823e-11	1.4733e-08
Cluster-34894.76544	51.1802	180.783	-1.7514	7.8451e-11	1.4833e-08
Cluster-34665.0	9.25325	77.0378	-2.7406	8.1604e-11	1.5333e-08
Cluster-34894.53383	45.7076	202.049	-2.0241	8.6344e-11	1.6163e-08
Cluster-34894.51338	94.8928	372.829	-1.8821	8.8097e-11	1.641e-08
Cluster-34894.65299	81.7704	259.267	-1.6092	8.9502e-11	1.659e-08
Cluster-34894.70873	2.18726	52.9304	-3.5581	9.3931e-11	1.7304e-08
Cluster-34894.29225	115.939	367.301	-1.6097	9.4827e-11	1.7448e-08
Cluster-34894.37401	122.68	650.758	-2.245	9.7761e-11	1.7944e-08
Cluster-34894.58030	32.944	243.604	-2.611	9.9806e-11	1.8275e-08
Cluster-34894.35442	22.2572	104.176	-2.0915	1.1114e-10	2.0105e-08
Cluster-34894.61458	13.4503	190.219	-3.2165	1.1507e-10	2.0766e-08
Cluster-34894.68197	22.3595	118.275	-2.2421	1.2001e-10	2.1505e-08
Cluster-34894.80756	83.169	251.424	-1.5477	1.2364e-10	2.2049e-08
Cluster-34894.58838	24.0933	127.264	-2.2414	1.2575e-10	2.2373e-08
Cluster-34894.81745	128.861	434.27	-1.6881	1.2962e-10	2.2952e-08
Cluster-34894.48395	83.71	570.945	-2.5248	1.3185e-10	2.3288e-08
Cluster-34894.59165	70.3944	384.091	-2.275	1.3198e-10	2.3288e-08
Cluster-34894.62945	375.766	1606.02	-1.9858	1.3572e-10	2.3921e-08
Cluster-34894.61464	95.4755	543.192	-2.3206	1.391e-10	2.443e-08
Cluster-34894.32347	19.4195	105.524	-2.2719	1.552e-10	2.7006e-08
Cluster-34894.58638	45.8602	307.315	-2.5031	1.6334e-10	2.8228e-08
Cluster-34894.46259	96.8355	368.99	-1.8426	1.6425e-10	2.832e-08
Cluster-34894.42584	39.4558	178.058	-2.0449	1.6826e-10	2.8846e-08
Cluster-34894.58258	174.516	756.908	-2.0023	1.751e-10	2.9781e-08
Cluster-34894.79113	34.7942	143.649	-1.9438	1.9704e-10	3.3176e-08
Cluster-34894.79438	44.2265	152.496	-1.718	2.003e-10	3.3672e-08
Cluster-34894.48481	330.137	1300.41	-1.8831	2.0303e-10	3.4033e-08
Cluster-34894.44136	184.735	560.571	-1.5509	2.0564e-10	3.4432e-08
Cluster-34894.55543	55.8798	194.072	-1.7231	2.0808e-10	3.4725e-08
Cluster-34894.56478	148.965	763.743	-2.2009	2.1548e-10	3.5644e-08
Cluster-34894.59484	79.0705	387.021	-2.1463	2.1908e-10	3.6159e-08
Cluster-34894.67891	37.6229	157.899	-1.9609	2.2809e-10	3.7471e-08
Cluster-34894.73556	39.5911	141.681	-1.7602	2.2827e-10	3.7471e-08
Cluster-34894.76492	29.2518	130.179	-2.0348	2.4108e-10	3.9317e-08
Cluster-34894.51004	23.0626	122.97	-2.237	2.6082e-10	4.2308e-08
Cluster-34894.27066	49.6585	169.048	-1.6994	2.7106e-10	4.3841e-08
Cluster-34894.58112	56.5803	195.569	-1.7159	2.7224e-10	4.3924e-08
Cluster-34894.57054	2111.78	7622.26	-1.7723	2.7337e-10	4.4059e-08
Cluster-34894.49687	367.56	1520.53	-1.9416	2.7614e-10	4.4457e-08
Cluster-34894.66257	2.68169	43.3092	-3.2817	2.919e-10	4.6845e-08
Cluster-34894.61988	5185.43	15642.6	-1.5416	2.9993e-10	4.7777e-08
Cluster-34894.75421	13.0327	123.847	-2.8458	3.045e-10	4.8353e-08
Cluster-34894.48978	56.8368	197.495	-1.7213	3.0921e-10	4.8996e-08
Cluster-34894.59159	29.2298	192.408	-2.4745	3.0959e-10	4.9006e-08
Cluster-34894.51927	143.376	489.501	-1.7005	3.1933e-10	5.0389e-08
Cluster-34894.54433	275.84	1033.91	-1.8189	3.4019e-10	5.3512e-08
Cluster-34894.62562	431.206	1728.6	-1.902	3.5669e-10	5.5874e-08
Cluster-30483.0	8.20902	66.2783	-2.6876	3.6578e-10	5.7179e-08
Cluster-34894.53986	41.0995	155.116	-1.8265	3.6863e-10	5.7446e-08
Cluster-34894.90878	1.62235	38.8788	-3.4986	3.7614e-10	5.8496e-08
Cluster-34894.52963	22.1616	169.159	-2.6319	3.7594e-10	5.8496e-08
Cluster-34894.64754	68.2276	228.262	-1.6727	4.2142e-10	6.4905e-08
Cluster-34894.84142	66.8445	209.644	-1.5921	5.1596e-10	7.7288e-08
Cluster-34894.81608	6.87526	71.7181	-2.9193	5.1669e-10	7.7321e-08
Cluster-34894.72372	64.6191	212.619	-1.6526	5.2953e-10	7.8928e-08
Cluster-34894.66268	154.448	572.298	-1.8032	5.3969e-10	8.0206e-08
Cluster-34894.32348	96.8821	289.5	-1.5298	5.551e-10	8.2333e-08
Cluster-34894.63200	19.3109	93.3729	-2.1243	6.0895e-10	8.9789e-08
Cluster-34894.66703	70.0165	216.162	-1.5715	6.167e-10	9.0755e-08
Cluster-34894.46826	144.574	443.51	-1.5597	6.3125e-10	9.2624e-08
Cluster-34894.37587	23.9473	165.837	-2.5268	6.4918e-10	9.507e-08
Cluster-34894.22318	91.1146	334.239	-1.7899	6.5921e-10	9.6165e-08
Cluster-34894.48653	40.9639	175.018	-1.9771	6.684e-10	9.7317e-08
Cluster-34894.45425	52.8129	278.453	-2.227	6.9457e-10	1.0074e-07
Cluster-11760.0	13.4761	94.8116	-2.5386	7.0481e-10	1.0203e-07
Cluster-34894.54757	24.3967	147.549	-2.3744	7.1338e-10	1.0317e-07
Cluster-34894.37405	227.741	1185.52	-2.2076	7.5928e-10	1.0881e-07
Cluster-34894.68259	17.742	94.6941	-2.2289	7.766e-10	1.1103e-07
Cluster-34894.41127	24.1355	285.791	-3.0271	8.0095e-10	1.1408e-07
Cluster-34894.59175	37.6871	147.068	-1.8679	8.1504e-10	1.1554e-07
Cluster-34894.96065	62.1687	217.088	-1.7284	8.5215e-10	1.2024e-07
Cluster-34894.64900	102.136	355.382	-1.7201	8.5693e-10	1.208e-07
Cluster-34894.48867	40.8997	161.281	-1.8791	8.9437e-10	1.2549e-07
Cluster-34894.74967	29.7903	145.036	-2.1294	9.6591e-10	1.3424e-07
Cluster-34894.35796	32.7549	129.296	-1.8792	9.8985e-10	1.366e-07
Cluster-34894.50596	71.1822	244.616	-1.7063	9.9484e-10	1.3704e-07
Cluster-34894.67888	27.2448	134.533	-2.1382	1.0588e-09	1.4505e-07
Cluster-34894.61808	123.332	429.768	-1.7227	1.1175e-09	1.5213e-07
Cluster-34894.65879	57.555	183.367	-1.6082	1.1463e-09	1.5569e-07
Cluster-34894.63843	197.597	594.328	-1.5333	1.1526e-09	1.5634e-07
Cluster-34894.67649	8.89068	75.9996	-2.7085	1.1556e-09	1.566e-07
Cluster-34894.33111	65.9859	198.784	-1.5375	1.1808e-09	1.593e-07
Cluster-34894.42542	25.9945	119.722	-2.0594	1.3093e-09	1.741e-07
Cluster-34894.74144	33.924	125.205	-1.7889	1.4866e-09	1.9531e-07
Cluster-34894.71967	4.65684	47.819	-2.8851	1.6728e-09	2.1656e-07
Cluster-34894.71825	11.3773	93.1011	-2.6697	1.7855e-09	2.2938e-07
Cluster-34894.87268	57.5742	189.911	-1.6526	1.8388e-09	2.3563e-07
Cluster-34894.70052	1.60725	47.511	-3.5385	1.8643e-09	2.3808e-07
Cluster-34894.1154	59.758	222.777	-1.8072	2.1126e-09	2.6686e-07
Cluster-34894.93597	34.911	129.568	-1.7984	2.1231e-09	2.6795e-07
Cluster-34894.59172	4120.79	17579.6	-1.9675	2.17e-09	2.7296e-07
Cluster-34894.27859	29.486	130.892	-2.0197	2.2291e-09	2.7923e-07
Cluster-34894.84054	21.303	96.2898	-2.0387	2.2665e-09	2.8312e-07
Cluster-34894.55506	73.6398	231.246	-1.5857	2.2677e-09	2.8312e-07
Cluster-34894.59749	993.014	2927.84	-1.5065	2.2937e-09	2.8495e-07
Cluster-34894.63144	47.4196	230.97	-2.1189	2.4144e-09	2.9822e-07
Cluster-34894.43464	67.4623	314.039	-2.071	2.4626e-09	3.0369e-07
Cluster-34894.60081	12.3724	73.0882	-2.3336	2.4888e-09	3.0641e-07
Cluster-34894.73473	56.2606	199.243	-1.7379	2.5383e-09	3.1225e-07
Cluster-34894.61536	28.6702	119.421	-1.9342	2.5638e-09	3.1501e-07
Cluster-34894.53239	31.784	114.57	-1.7593	2.5649e-09	3.1501e-07
Cluster-34894.71966	2.28168	36.6793	-3.1928	2.6081e-09	3.2006e-07
Cluster-34894.48218	32.2353	149.254	-2.0651	2.6783e-09	3.2733e-07
Cluster-34894.69797	58.1725	184.394	-1.5957	2.7557e-09	3.3409e-07
Cluster-34894.43803	28.3111	114.275	-1.8988	2.8027e-09	3.3842e-07
Cluster-34894.42583	19.0918	88.3159	-2.0576	2.8646e-09	3.4507e-07
Cluster-34894.44147	4.21057	47.3004	-2.9327	2.8684e-09	3.4525e-07
Cluster-34894.78589	15.3106	88.8722	-2.3161	3.0113e-09	3.6101e-07
Cluster-34894.59944	180.158	599.965	-1.6607	3.156e-09	3.7566e-07
Cluster-34894.19171	54.6713	212.959	-1.8549	3.1612e-09	3.7598e-07
Cluster-34894.56488	25.0396	109.377	-1.9859	3.6654e-09	4.2985e-07
Cluster-34894.38811	48.9564	166.462	-1.6851	3.7974e-09	4.4395e-07
Cluster-34894.75709	101.584	312.524	-1.5612	3.8518e-09	4.4925e-07
Cluster-34894.60327	63.2035	197.819	-1.5831	3.9128e-09	4.5532e-07
Cluster-34894.67428	91.8388	342.225	-1.7994	3.9599e-09	4.6044e-07
Cluster-34894.66163	8.54671	59.6935	-2.5068	4.1198e-09	4.7756e-07
Cluster-34894.29868	51.809	341.216	-2.4441	4.4555e-09	5.1253e-07
Cluster-34894.80495	78.0581	259.456	-1.6567	4.5119e-09	5.1784e-07
Cluster-34894.53351	63.2891	245.215	-1.8437	4.6834e-09	5.3305e-07
Cluster-34894.45983	73.6394	313.088	-1.9563	4.7243e-09	5.3689e-07
Cluster-34894.11431	23.3175	101.449	-1.9818	5.1934e-09	5.8492e-07
Cluster-34894.51194	803.908	2501.49	-1.5731	5.2524e-09	5.9023e-07
Cluster-34894.76379	33.2905	117.642	-1.7349	5.2773e-09	5.9215e-07
Cluster-34894.69437	45.796	257.237	-2.2735	5.7008e-09	6.3589e-07
Cluster-34894.56781	67.8676	298.893	-1.9981	5.8267e-09	6.4705e-07
Cluster-34894.85422	52.8239	191.677	-1.7645	6.0486e-09	6.6678e-07
Cluster-34894.72041	104.117	328.4	-1.5901	6.0836e-09	6.6966e-07
Cluster-34894.69368	81.0069	278.806	-1.6989	6.1246e-09	6.7368e-07
Cluster-34894.53978	22.447	92.0894	-1.9121	6.192e-09	6.806e-07
Cluster-34894.87363	4.59452	46.2978	-2.8297	6.3714e-09	6.9828e-07
Cluster-34894.46775	42.011	163.559	-1.8521	6.4112e-09	7.0154e-07
Cluster-34894.40749	270.591	1101.91	-1.904	6.8211e-09	7.3896e-07
Cluster-34894.59925	1417.24	5797.72	-1.9093	7.6797e-09	8.2782e-07
Cluster-34894.33082	16.9902	84.3649	-2.1252	7.7782e-09	8.3723e-07
Cluster-34894.36054	101.998	328.645	-1.6157	7.8033e-09	8.3934e-07
Cluster-34894.61569	78.3064	249.133	-1.5995	8.2006e-09	8.7769e-07
Cluster-34894.64773	285.285	1267.53	-2.0047	8.6859e-09	9.2634e-07
Cluster-34894.57366	164.371	609.462	-1.7892	9.2502e-09	9.7959e-07
Cluster-34894.81610	108.177	597.29	-2.248	9.7836e-09	1.0281e-06
Cluster-34894.81158	62.6849	204.081	-1.6305	9.852e-09	1.0339e-06
Cluster-34894.48260	3.45682	47.6942	-3.0394	1.0288e-08	1.0773e-06
Cluster-31952.0	0.611174	27.3818	-3.5279	1.0467e-08	1.0921e-06
Cluster-34894.57323	22.3268	104.791	-2.0585	1.0471e-08	1.0921e-06
Cluster-32090.1	5.25196	57.4927	-2.8879	1.0812e-08	1.126e-06
Cluster-34894.58725	1919.11	6075.24	-1.5923	1.1108e-08	1.1545e-06
Cluster-34894.61468	84.3083	303.471	-1.7522	1.1215e-08	1.1639e-06
Cluster-34894.61780	153.759	613.907	-1.8771	1.1285e-08	1.1696e-06
Cluster-34894.52395	15.6171	97.6658	-2.3743	1.1396e-08	1.1803e-06
Cluster-34894.75191	357.911	1150.44	-1.6114	1.1711e-08	1.2107e-06
Cluster-34894.28784	43.9247	169.319	-1.8354	1.2906e-08	1.3196e-06
Cluster-34894.57079	20.9484	162.34	-2.5858	1.3158e-08	1.3409e-06
Cluster-34894.70208	106.891	501.924	-2.0649	1.3418e-08	1.3634e-06
Cluster-34894.55676	19.2939	85.7102	-2.0027	1.368e-08	1.3873e-06
Cluster-34894.55013	511.314	1548.27	-1.5349	1.3791e-08	1.3976e-06
Cluster-34894.53199	18.0014	83.6477	-2.0463	1.4711e-08	1.4775e-06
Cluster-34894.72480	63.4134	190.221	-1.5228	1.4727e-08	1.4775e-06
Cluster-34894.67908	16.2292	73.1573	-2.015	1.5189e-08	1.5188e-06
Cluster-34894.100921	41.4533	165.313	-1.8751	1.5268e-08	1.5257e-06
Cluster-34894.54883	44.1954	136.746	-1.5643	1.5398e-08	1.5367e-06
Cluster-34894.58271	4260.25	12733.2	-1.5179	1.5732e-08	1.5659e-06
Cluster-26718.0	29.6439	114.564	-1.8349	1.6086e-08	1.5969e-06
Cluster-34894.53865	30.2384	146.005	-2.0872	1.6956e-08	1.6777e-06
Cluster-34894.55703	40.9179	171.95	-1.9328	1.763e-08	1.7387e-06
Cluster-34894.41491	22.6572	95.7424	-1.9398	1.7898e-08	1.7605e-06
Cluster-34894.48244	52.7805	170.056	-1.6112	1.7956e-08	1.7639e-06
Cluster-34894.70669	79.0261	283.604	-1.7474	1.8421e-08	1.806e-06
Cluster-34894.61672	12.8712	80.2638	-2.3597	1.9309e-08	1.8821e-06
Cluster-34894.68549	136.96	404.186	-1.5014	2.0755e-08	1.9972e-06
Cluster-34894.50918	63.6844	190.707	-1.5194	2.1203e-08	2.0338e-06
Cluster-34894.49047	22.2009	144.349	-2.406	2.1382e-08	2.0478e-06
Cluster-34894.40245	104.748	412.349	-1.8575	2.1389e-08	2.0478e-06
Cluster-34894.37402	13.437	103.113	-2.5604	2.1452e-08	2.0525e-06
Cluster-34894.35864	353.8	1977.35	-2.2514	2.1934e-08	2.0973e-06
Cluster-34894.54153	27.1303	123.734	-2.028	2.2369e-08	2.1334e-06
Cluster-34894.38891	76.3724	247.57	-1.6177	2.2801e-08	2.1665e-06
Cluster-34894.36197	26.1701	147.03	-2.256	2.2896e-08	2.1731e-06
Cluster-19845.0	29.4095	128.462	-1.9804	2.29e-08	2.1731e-06
Cluster-34894.54641	20.7863	95.6415	-2.0398	2.4006e-08	2.2666e-06
Cluster-34894.65018	34.6608	114.512	-1.6395	2.4174e-08	2.2768e-06
Cluster-34894.28714	18.5081	94.376	-2.1473	2.49e-08	2.3393e-06
Cluster-34894.27067	10.537	62.1458	-2.3089	2.4933e-08	2.3409e-06
Cluster-34894.58152	239.445	800.636	-1.6564	2.5174e-08	2.3621e-06
Cluster-34894.44206	6.50736	58.9525	-2.7081	2.5229e-08	2.3658e-06
Cluster-34894.80202	45.6387	148.721	-1.6275	2.5303e-08	2.3713e-06
Cluster-34894.69137	15.3606	77.1295	-2.1331	2.5337e-08	2.3729e-06
Cluster-34894.56384	103.715	391.057	-1.8046	2.5388e-08	2.3763e-06
Cluster-34894.60738	31.7595	190.869	-2.3287	2.6583e-08	2.4718e-06
Cluster-34894.54753	190.484	911.166	-2.0791	2.6584e-08	2.4718e-06
Cluster-34894.84053	85.7261	262.554	-1.5483	2.6589e-08	2.4718e-06
Cluster-34894.68975	21.2631	90.3215	-1.9384	2.7366e-08	2.536e-06
Cluster-34894.44517	35.7396	148.972	-1.9188	2.7529e-08	2.5467e-06
Cluster-34894.70803	40.5116	211.351	-2.1726	2.8358e-08	2.6153e-06
Cluster-34894.26612	2.89286	43.0111	-3.057	2.8729e-08	2.6398e-06
Cluster-34894.45995	446.802	2396.89	-2.2039	2.9453e-08	2.6981e-06
Cluster-34894.59102	18.6034	79.0562	-1.9443	2.9895e-08	2.732e-06
Cluster-34894.73678	28.9355	112.923	-1.8419	3.0333e-08	2.7703e-06
Cluster-34894.66259	11.8921	67.2733	-2.2502	3.0531e-08	2.7867e-06
Cluster-34894.68939	55.1997	189.72	-1.6884	3.0617e-08	2.7928e-06
Cluster-34894.78240	22.228	100.226	-2.0078	3.0768e-08	2.8033e-06
Cluster-34894.52862	22.9868	173.621	-2.5471	3.1341e-08	2.8451e-06
Cluster-13483.0	23.0714	96.018	-1.9163	3.1762e-08	2.8781e-06
Cluster-34894.23844	34.5217	127.16	-1.7761	3.2082e-08	2.9019e-06
Cluster-34894.48676	23.0119	89.3011	-1.833	3.2918e-08	2.9668e-06
Cluster-34894.51510	183.87	703.247	-1.8191	3.427e-08	3.064e-06
Cluster-34894.59046	73.7062	222.663	-1.5296	3.4534e-08	3.083e-06
Cluster-34894.19480	42.1007	136.657	-1.6225	3.4887e-08	3.1053e-06
Cluster-34894.58822	3071.73	9506.53	-1.5589	3.5349e-08	3.1427e-06
Cluster-34894.64118	13.5724	68.5519	-2.1423	3.5771e-08	3.1727e-06
Cluster-34894.83721	8.26251	57.4511	-2.4494	3.5991e-08	3.1899e-06
Cluster-34894.72135	85.846	266.555	-1.5645	3.6518e-08	3.2276e-06
Cluster-34894.58033	35.6842	210.29	-2.2968	3.813e-08	3.3504e-06
Cluster-34894.29344	22.414	86.0924	-1.8207	3.8543e-08	3.3769e-06
Cluster-34894.75349	10.8105	61.4288	-2.2614	4.0478e-08	3.5279e-06
Cluster-34894.63842	51.9138	161.519	-1.566	4.1321e-08	3.592e-06
Cluster-34894.56294	40.1195	123.946	-1.5572	4.1408e-08	3.5944e-06
Cluster-34894.53186	478.837	1545.82	-1.6105	4.4356e-08	3.813e-06
Cluster-34894.58364	22.0753	90.5744	-1.8976	4.5747e-08	3.9239e-06
Cluster-34894.59756	105.676	355.205	-1.6587	4.5804e-08	3.9263e-06
Cluster-34894.66331	46.5334	169.26	-1.7549	4.5952e-08	3.9345e-06
Cluster-34894.79063	65.8431	204.05	-1.5616	4.6525e-08	3.979e-06
Cluster-34894.53327	1036.86	4963.95	-2.0743	4.7065e-08	4.0206e-06
Cluster-34894.38142	31.18	120.357	-1.8224	4.769e-08	4.0648e-06
Cluster-34894.18688	24.9569	94.2815	-1.7984	4.8416e-08	4.1174e-06
Cluster-34894.47338	36.9066	153.765	-1.916	4.8526e-08	4.1244e-06
Cluster-34894.50912	25.4976	94.8237	-1.7841	4.9623e-08	4.2129e-06
Cluster-34894.67732	22.0914	98.0925	-1.9866	4.9667e-08	4.2143e-06
Cluster-34894.46798	28.4999	107.841	-1.8042	5.0005e-08	4.2358e-06
Cluster-34894.70001	142.088	454.503	-1.5997	5.0375e-08	4.2623e-06
Cluster-34894.22015	36.3234	134.676	-1.7754	5.057e-08	4.2686e-06
Cluster-34894.36690	11.5954	104.102	-2.689	5.0696e-08	4.2751e-06
Cluster-34894.21255	11.2888	77.4615	-2.4471	5.3213e-08	4.4698e-06
Cluster-34894.25369	18.6497	83.3984	-1.9964	5.5508e-08	4.6419e-06
Cluster-29562.0	21.4702	137.165	-2.3756	5.5617e-08	4.6485e-06
Cluster-34894.55757	34.3168	144.442	-1.926	5.6476e-08	4.7072e-06
Cluster-34894.14799	24.8105	114.709	-2.0287	5.6913e-08	4.741e-06
Cluster-34894.54477	46.6542	165.625	-1.7251	5.7114e-08	4.7498e-06
Cluster-34894.57301	18.0734	96.9908	-2.1984	5.7258e-08	4.754e-06
Cluster-34894.59136	2772.12	8352.94	-1.5229	6.066e-08	4.9951e-06
Cluster-34894.67959	39.6525	217.019	-2.2132	6.1615e-08	5.0599e-06
Cluster-34894.41433	39.3434	124.294	-1.5836	6.6226e-08	5.3974e-06
Cluster-34894.43840	19.0676	87.2441	-2.0239	6.697e-08	5.4492e-06
Cluster-34894.58921	399.603	2100.82	-2.1714	6.7339e-08	5.4733e-06
Cluster-34894.60012	1.31677	37.2067	-3.3128	6.7661e-08	5.4966e-06
Cluster-34894.51782	12.0177	60.7367	-2.1262	6.7712e-08	5.4978e-06
Cluster-34894.6976	6.34245	102.614	-3.0936	6.8083e-08	5.5249e-06
Cluster-34894.59817	34.4043	134.47	-1.8394	7.0264e-08	5.6835e-06
Cluster-34894.58019	394.888	1520.35	-1.8216	7.2157e-08	5.821e-06
Cluster-34894.87290	78.1459	241.773	-1.5543	7.2204e-08	5.8217e-06
Cluster-34894.62691	242.394	887.411	-1.7612	7.3644e-08	5.9276e-06
Cluster-34894.72379	28.0769	114.499	-1.8829	7.7123e-08	6.172e-06
Cluster-34894.62776	32.877	207.152	-2.3518	8.514e-08	6.7174e-06
Cluster-34894.6227	15.9708	70.1976	-1.9704	8.5762e-08	6.7558e-06
Cluster-34894.67594	17.6423	83.6957	-2.0572	8.6636e-08	6.821e-06
Cluster-34894.46856	21.8321	97.4196	-1.9872	8.7857e-08	6.903e-06
Cluster-34894.57971	0.705592	34.3448	-3.4355	8.8415e-08	6.9322e-06
Cluster-34894.27812	41.4495	166.757	-1.8727	8.9716e-08	7.0232e-06
Cluster-34894.61214	4.43779	44.7926	-2.7427	9.3516e-08	7.2866e-06
Cluster-34894.73927	54.0158	173.871	-1.6062	9.6427e-08	7.4863e-06
Cluster-34894.52073	45.7966	139.438	-1.5335	1.0302e-07	7.945e-06
Cluster-34894.17411	46.0837	179.294	-1.831	1.1137e-07	8.5278e-06
Cluster-34894.78902	50.0334	177.695	-1.7235	1.1327e-07	8.647e-06
Cluster-34894.58292	46.8708	166.632	-1.7251	1.1612e-07	8.8197e-06
Cluster-34894.93102	33.5863	108.038	-1.598	1.1608e-07	8.8197e-06
Cluster-34894.73636	38.7537	139.076	-1.7322	1.2009e-07	9.0894e-06
Cluster-34894.53859	45.8489	136.797	-1.5106	1.2144e-07	9.178e-06
Cluster-34894.61667	8.80603	63.0806	-2.464	1.2313e-07	9.3007e-06
Cluster-34894.53323	3699.27	11312.4	-1.5379	1.2834e-07	9.6462e-06
Cluster-34894.57744	370.11	1316.97	-1.7233	1.2862e-07	9.6623e-06
Cluster-34894.48158	12.6707	76.2705	-2.3053	1.2879e-07	9.6703e-06
Cluster-34894.65769	39.4297	135.838	-1.6888	1.4136e-07	1.0518e-05
Cluster-34894.17672	24.8625	92.4619	-1.7706	1.4209e-07	1.0563e-05
Cluster-34894.43825	132.257	680.348	-2.1384	1.4248e-07	1.0582e-05
Cluster-34894.110192	52.946	201.887	-1.8049	1.4391e-07	1.0672e-05
Cluster-34894.72725	102.202	314.288	-1.5453	1.448e-07	1.0733e-05
Cluster-34894.57129	45.7309	210.083	-2.0166	1.4562e-07	1.0789e-05
Cluster-34894.50952	91.9546	358.784	-1.831	1.4709e-07	1.0887e-05
Cluster-34894.83517	4.80664	40.4806	-2.5863	1.4851e-07	1.0976e-05
Cluster-34894.78860	10.0756	53.7467	-2.1711	1.4906e-07	1.0995e-05
Cluster-34894.63209	28.9151	112.155	-1.8272	1.4971e-07	1.1037e-05
Cluster-34894.59508	159.444	560.214	-1.7076	1.5034e-07	1.1068e-05
Cluster-34894.55143	17.7874	78.7782	-1.9722	1.5267e-07	1.1228e-05
Cluster-34894.42954	40.3134	146.854	-1.7536	1.5395e-07	1.1306e-05
Cluster-34894.95140	44.2086	142.732	-1.607	1.5648e-07	1.1463e-05
Cluster-34894.61467	1173.72	3767.41	-1.5968	1.5935e-07	1.1628e-05
Cluster-34894.30922	8.43813	65.3813	-2.5237	1.6784e-07	1.216e-05
Cluster-34894.104224	69.6939	223.995	-1.5949	1.7315e-07	1.2461e-05
Cluster-34894.45955	5.5887	52.6671	-2.6834	1.7686e-07	1.2673e-05
Cluster-34894.79103	434.431	1850.22	-1.9292	1.8021e-07	1.2882e-05
Cluster-34894.45762	13.4522	67.3691	-2.0987	1.8153e-07	1.2958e-05
Cluster-34894.51818	350.526	1043.82	-1.5029	1.8186e-07	1.297e-05
Cluster-34894.37552	80.8367	286.193	-1.7131	1.8352e-07	1.3064e-05
Cluster-34894.82104	12.2547	77.3666	-2.3421	1.8697e-07	1.3278e-05
Cluster-34894.53632	2.26658	35.5079	-2.9984	1.896e-07	1.3428e-05
Cluster-34894.47968	21.5463	88.4566	-1.8871	1.8948e-07	1.3428e-05
Cluster-34894.44455	24.0851	106.679	-1.9795	1.9079e-07	1.3504e-05
Cluster-34894.57650	71.3716	231.336	-1.6053	1.9269e-07	1.3613e-05
Cluster-34894.65182	18.4627	83.4541	-1.9905	1.9414e-07	1.369e-05
Cluster-34894.24271	0.352796	20.4976	-3.3552	1.9965e-07	1.4059e-05
Cluster-34894.65735	23.5142	93.9204	-1.8614	2.0742e-07	1.4558e-05
Cluster-34894.68617	30.1003	105.383	-1.6967	2.0957e-07	1.4696e-05
Cluster-34894.59915	1276.55	5064.16	-1.8467	2.1294e-07	1.4897e-05
Cluster-34894.101636	27.5155	106.76	-1.8136	2.1804e-07	1.5211e-05
Cluster-34894.58719	1048.26	3227.76	-1.5434	2.2691e-07	1.5736e-05
Cluster-34894.53506	29.5407	106.349	-1.7278	2.2781e-07	1.5791e-05
Cluster-34894.103405	10.1691	58.0625	-2.2378	2.2866e-07	1.5835e-05
Cluster-34894.80873	95.4995	317.056	-1.6348	2.3256e-07	1.6076e-05
Cluster-34894.82778	14.2157	75.3857	-2.164	2.3339e-07	1.6118e-05
Cluster-34894.73135	16.966	71.1705	-1.9103	2.3549e-07	1.6213e-05
Cluster-34894.84520	10.9782	72.5242	-2.3728	2.3622e-07	1.624e-05
Cluster-34894.47033	20.0851	122.678	-2.3004	2.38e-07	1.6347e-05
Cluster-34894.38304	22.1244	79.026	-1.7228	2.3982e-07	1.6434e-05
Cluster-34894.48694	26.8732	114.507	-1.9191	2.4524e-07	1.676e-05
Cluster-34894.30763	108.557	395.342	-1.745	2.5228e-07	1.7187e-05
Cluster-34894.41592	38.9897	135.105	-1.6897	2.626e-07	1.7806e-05
Cluster-34894.60227	24.4524	83.8641	-1.674	2.6844e-07	1.8148e-05
Cluster-34894.58616	249.364	902.794	-1.7377	2.7068e-07	1.8283e-05
Cluster-34894.70422	23.6423	107.446	-1.9985	2.7225e-07	1.8364e-05
Cluster-34894.81644	7.04016	51.8251	-2.4588	2.7398e-07	1.8473e-05
Cluster-34894.60099	6.0913	92.7954	-2.9831	2.7568e-07	1.8571e-05
Cluster-34894.86202	40.3065	223.714	-2.2062	2.758e-07	1.8571e-05
Cluster-34894.90160	34.3882	117.303	-1.6665	2.7581e-07	1.8571e-05
Cluster-34894.45628	20.6072	118.911	-2.238	2.8235e-07	1.8953e-05
Cluster-34894.52508	18.4797	98.5196	-2.1636	2.851e-07	1.9111e-05
Cluster-32564.2	4.96242	41.3993	-2.5737	2.9537e-07	1.9682e-05
Cluster-34894.47906	65.3644	209.029	-1.5902	2.9629e-07	1.9721e-05
Cluster-34894.52727	46.4443	144.028	-1.5475	3.0298e-07	2.0131e-05
Cluster-34894.36935	83.4976	263.827	-1.5722	3.1248e-07	2.0653e-05
Cluster-34894.43422	36.5787	133.529	-1.7478	3.1597e-07	2.0838e-05
Cluster-34894.84015	25.0412	103.527	-1.8927	3.1802e-07	2.0955e-05
Cluster-34894.75142	17.766	70.1411	-1.8419	3.19e-07	2.1003e-05
Cluster-34894.57440	13.5938	68.1163	-2.0951	3.2333e-07	2.123e-05
Cluster-34894.31759	29.3657	116.031	-1.8371	3.2393e-07	2.1251e-05
Cluster-13177.1	22.8612	93.9433	-1.883	3.3518e-07	2.1932e-05
Cluster-34894.44155	10.3632	58.3898	-2.2102	3.3879e-07	2.2082e-05
Cluster-34894.58821	8.03529	52.5941	-2.3487	3.4642e-07	2.2501e-05
Cluster-34894.88229	22.9849	98.9421	-1.9365	3.6096e-07	2.3285e-05
Cluster-34894.23457	23.7808	83.7572	-1.7031	3.9233e-07	2.5041e-05
Cluster-34894.66748	32.3621	113.392	-1.6925	3.9441e-07	2.5152e-05
Cluster-34894.80258	38.3534	125.159	-1.6167	4.0052e-07	2.551e-05
Cluster-34894.53973	4.93127	43.6114	-2.6082	4.0984e-07	2.6049e-05
Cluster-34894.40078	18.3985	77.3196	-1.8994	4.0986e-07	2.6049e-05
Cluster-34894.61479	30.8332	119.896	-1.816	4.2252e-07	2.6697e-05
Cluster-34894.77947	93.6044	282.163	-1.5154	4.2648e-07	2.6924e-05
Cluster-34894.50485	34.7008	191.828	-2.1936	4.5343e-07	2.8435e-05
Cluster-34894.71540	29.8891	99.6217	-1.6354	4.566e-07	2.8622e-05
Cluster-34894.35421	21.5435	77.2933	-1.7237	4.598e-07	2.8798e-05
Cluster-34894.41038	5.84803	41.6395	-2.4231	4.6074e-07	2.8845e-05
Cluster-34894.45734	834.231	3009.17	-1.7294	4.661e-07	2.9133e-05
Cluster-34894.45429	308.442	982.483	-1.5819	4.6769e-07	2.9208e-05
Cluster-34894.44002	21.0088	89.037	-1.9154	4.8568e-07	3.0144e-05
Cluster-34894.34488	8.14671	46.479	-2.2186	4.8922e-07	3.0326e-05
Cluster-34894.10739	28.6309	99.0553	-1.6803	4.9005e-07	3.0352e-05
Cluster-34894.48106	19.3332	78.4622	-1.8571	5.0041e-07	3.0943e-05
Cluster-34894.33018	32.1698	99.7689	-1.5461	5.066e-07	3.1268e-05
Cluster-34894.34630	5.6057	37.9212	-2.3802	5.0898e-07	3.1374e-05
Cluster-26286.0	29.9067	133.892	-1.9696	5.2426e-07	3.2246e-05
Cluster-34894.63845	27.3846	106.958	-1.8159	5.3865e-07	3.3077e-05
Cluster-34894.54415	37.2399	127.354	-1.6671	5.4363e-07	3.3315e-05
Cluster-34894.41391	34.9692	114.38	-1.6102	5.4396e-07	3.3322e-05
Cluster-34894.42617	118.552	362.869	-1.5299	5.546e-07	3.3864e-05
Cluster-34894.8199	0	27.5654	-3.3948	5.5637e-07	3.3944e-05
Cluster-34894.54914	291	873.149	-1.507	5.6515e-07	3.4424e-05
Cluster-34894.72922	18.3158	73.5097	-1.8515	5.8364e-07	3.5407e-05
Cluster-34894.35439	133.077	471.199	-1.7068	5.8729e-07	3.5557e-05
Cluster-23733.0	28.1774	94.0737	-1.6373	5.9303e-07	3.5861e-05
Cluster-34894.49724	10.5612	59.1336	-2.1886	6.1549e-07	3.7012e-05
Cluster-34894.82394	21.4491	83.1669	-1.8069	6.1594e-07	3.7024e-05
Cluster-34894.65946	45.3913	140.15	-1.5412	6.3058e-07	3.7753e-05
Cluster-34894.86699	6.94041	48.2858	-2.4005	6.3234e-07	3.7829e-05
Cluster-34894.43386	24.6091	89.9414	-1.7444	6.4062e-07	3.8248e-05
Cluster-34894.62422	19.8963	77.2127	-1.8043	6.5989e-07	3.9225e-05
Cluster-34894.70695	24.1399	87.2062	-1.7237	6.6228e-07	3.9323e-05
Cluster-34894.28379	47.8785	145.84	-1.5254	6.6811e-07	3.9622e-05
Cluster-34894.48650	26.9229	90.1039	-1.6419	6.8043e-07	4.0289e-05
Cluster-34894.87748	5.28406	43.3531	-2.531	6.8471e-07	4.0511e-05
Cluster-34894.79000	11.5491	57.6889	-2.0873	6.9935e-07	4.1248e-05
Cluster-34894.64033	407.878	1269.65	-1.5496	7.0799e-07	4.1643e-05
Cluster-34894.65876	3.18334	74.4273	-3.1072	7.2403e-07	4.2421e-05
Cluster-34894.46935	31.1709	144.933	-2.0049	7.2593e-07	4.2499e-05
Cluster-34894.82181	27.9341	92.5084	-1.6283	7.3588e-07	4.3015e-05
Cluster-34894.49615	252.89	772.528	-1.5274	7.3881e-07	4.3169e-05
Cluster-32300.0	17.6807	76.3948	-1.9209	7.44e-07	4.3422e-05
Cluster-34894.40536	0.321638	18.4944	-3.2238	7.5338e-07	4.3817e-05
Cluster-34894.71774	8.03435	62.3424	-2.4814	7.532e-07	4.3817e-05
Cluster-34894.62690	1.26956	27.452	-3.0396	7.6029e-07	4.4185e-05
Cluster-34894.44156	14.3145	70.5337	-2.0633	7.6567e-07	4.4429e-05
Cluster-34894.62838	5.46313	41.8887	-2.4653	7.7998e-07	4.5121e-05
Cluster-34894.53956	65.1466	196.716	-1.5146	7.9274e-07	4.5771e-05
Cluster-34894.101537	56.5508	173.173	-1.5296	8.1691e-07	4.7076e-05
Cluster-34894.71059	45.7381	155.402	-1.6523	8.2231e-07	4.7333e-05
Cluster-34894.77692	40.9828	123.081	-1.5063	8.4157e-07	4.8312e-05
Cluster-34894.54143	63.1359	248.491	-1.8244	8.4668e-07	4.8587e-05
Cluster-34894.71353	60.2918	212.029	-1.6941	8.5047e-07	4.8749e-05
Cluster-34894.71301	13.6794	72.629	-2.1311	8.5263e-07	4.8817e-05
Cluster-34894.78052	5.91318	44.9765	-2.4643	8.6335e-07	4.9356e-05
Cluster-34894.23045	12.9754	64.9178	-2.0852	8.6843e-07	4.9608e-05
Cluster-34894.57196	18.9663	87.2397	-1.9866	8.7088e-07	4.973e-05
Cluster-18751.0	7.68438	75.6399	-2.6573	8.7328e-07	4.977e-05
Cluster-29404.0	7.1969	41.1966	-2.2103	9.228e-07	5.2259e-05
Cluster-34894.48364	20.2793	95.9831	-2.0181	9.5065e-07	5.3674e-05
Cluster-34894.60316	45.036	137.743	-1.5227	9.631e-07	5.4276e-05
Cluster-34894.5093	1.5912	27.0784	-2.9292	9.7868e-07	5.503e-05
Cluster-34894.38307	17.912	73.8619	-1.8725	9.8181e-07	5.5165e-05
Cluster-34894.81618	34.2214	109.049	-1.5758	1.0015e-06	5.6188e-05
Cluster-34894.50765	53.3123	161.762	-1.5165	1.0276e-06	5.7415e-05
Cluster-34894.74522	62.3396	201.112	-1.5911	1.0446e-06	5.8196e-05
Cluster-34894.92009	1.2384	23.8232	-2.9602	1.0789e-06	5.9797e-05
Cluster-34894.40735	20.4325	73.7222	-1.7263	1.0867e-06	6.0139e-05
Cluster-34894.51509	24.1852	88.668	-1.7345	1.0994e-06	6.0706e-05
Cluster-34894.46668	21.8553	83.1155	-1.7767	1.1269e-06	6.2068e-05
Cluster-34894.74284	18.0564	66.56	-1.7487	1.1441e-06	6.2921e-05
Cluster-34894.80636	26.3813	88.8115	-1.6388	1.1523e-06	6.3284e-05
Cluster-34894.18478	19.326	69.6755	-1.7234	1.1588e-06	6.3593e-05
Cluster-34894.86975	7.61295	45.1676	-2.2424	1.1725e-06	6.4272e-05
Cluster-34894.38385	26.6806	89.1124	-1.636	1.2112e-06	6.6251e-05
Cluster-34894.67387	28.7183	110.891	-1.7931	1.212e-06	6.6271e-05
Cluster-34894.46214	1.89773	26.5047	-2.823	1.2163e-06	6.646e-05
Cluster-34894.81865	25.8412	91.6478	-1.7072	1.2274e-06	6.6944e-05
Cluster-34894.82719	31.6093	108.591	-1.6595	1.2573e-06	6.8377e-05
Cluster-34894.57277	164.818	612.336	-1.7533	1.2771e-06	6.9304e-05
Cluster-34894.64521	11.7282	57.8893	-2.0596	1.279e-06	6.9381e-05
Cluster-34894.49731	79.0141	372.66	-2.0113	1.3189e-06	7.1286e-05
Cluster-34894.54018	34.9173	117.135	-1.6311	1.3259e-06	7.1613e-05
Cluster-34894.35164	10.317	48.9904	-2.0115	1.353e-06	7.2947e-05
Cluster-22853.0	0.916761	24.6135	-3.0522	1.3589e-06	7.3212e-05
Cluster-34894.87744	27.1511	91.7195	-1.6426	1.3777e-06	7.3989e-05
Cluster-34894.50264	8.34277	46.6424	-2.1713	1.3845e-06	7.4272e-05
Cluster-34894.60368	1.92794	28.6664	-2.852	1.4e-06	7.492e-05
Cluster-34894.46905	2.36005	28.8843	-2.7669	1.4188e-06	7.579e-05
Cluster-34894.44808	3.55218	32.9785	-2.585	1.4332e-06	7.64e-05
Cluster-34894.42033	31.1095	101.09	-1.5933	1.4389e-06	7.6657e-05
Cluster-34894.54152	2.63353	32.8602	-2.7728	1.4435e-06	7.6864e-05
Cluster-34894.57548	125.541	407.24	-1.5964	1.4574e-06	7.7358e-05
Cluster-34894.48614	23.9045	86.2508	-1.7213	1.471e-06	7.797e-05
Cluster-34894.10498	14.841	64.3792	-1.927	1.4893e-06	7.8744e-05
Cluster-34894.36661	19.9693	69.025	-1.6712	1.4997e-06	7.9212e-05
Cluster-34894.50527	0.305587	31.6826	-3.2382	1.5167e-06	8.0026e-05
Cluster-34894.65520	0.658383	42.9645	-3.22	1.5349e-06	8.0868e-05
Cluster-34894.62381	28.0357	91.7559	-1.6056	1.5663e-06	8.2325e-05
Cluster-34894.44408	15.1869	78.0304	-2.0898	1.608e-06	8.4313e-05
Cluster-15741.0	8.54482	54.9121	-2.3061	1.6135e-06	8.4543e-05
Cluster-34894.77629	14.0722	60.447	-1.9108	1.6871e-06	8.794e-05
Cluster-34894.91089	22.0907	146.339	-2.3264	1.6896e-06	8.8032e-05
Cluster-34894.86205	74.7866	313.2	-1.8826	1.6967e-06	8.8317e-05
Cluster-34894.82295	17.708	77.5409	-1.9239	1.7933e-06	9.258e-05
Cluster-34894.50239	46.9161	202.635	-1.9149	1.7949e-06	9.2632e-05
Cluster-34894.40887	26.7117	87.8629	-1.6131	1.8008e-06	9.287e-05
Cluster-34894.72118	1.94399	25.1595	-2.7665	1.8202e-06	9.3677e-05
Cluster-34894.66164	3.58334	29.9876	-2.5023	1.8358e-06	9.4356e-05
Cluster-34894.48190	11.5481	54.7244	-2.0155	1.8957e-06	9.7033e-05
Cluster-34894.72520	40.3688	131.918	-1.6043	1.9123e-06	9.7842e-05
Cluster-34894.73936	58.8315	216.716	-1.739	1.9585e-06	9.9737e-05
Cluster-34894.56292	3.2466	31.8159	-2.6076	1.9633e-06	9.9916e-05
Cluster-34894.44037	19.6879	79.3025	-1.8337	2.0267e-06	0.0001027
Cluster-34894.103965	46.8789	146.865	-1.5464	2.0372e-06	0.00010312
Cluster-34894.49298	11.7763	62.2211	-2.1153	2.0838e-06	0.0001052
Cluster-34894.74521	5.97455	36.985	-2.2674	2.0905e-06	0.00010547
Cluster-34894.37424	24.3215	81.8269	-1.639	2.1038e-06	0.00010606
Cluster-34894.41414	78.9975	267.58	-1.6431	2.1045e-06	0.00010607
Cluster-34894.44277	39.1886	127.933	-1.5995	2.1178e-06	0.00010666
Cluster-34894.75395	21.5444	72.0574	-1.6268	2.191e-06	0.00010981
Cluster-34894.25859	18.7211	71.7276	-1.7768	2.2505e-06	0.00011227
Cluster-34894.87432	39.1483	117.897	-1.5059	2.2504e-06	0.00011227
Cluster-34894.61778	4406.48	17029	-1.7915	2.2575e-06	0.00011238
Cluster-34894.60737	34.1296	112.214	-1.612	2.2628e-06	0.00011258
Cluster-34894.86646	6.93852	39.6715	-2.1934	2.2826e-06	0.00011345
Cluster-34894.51476	62.1958	188.948	-1.5099	2.2964e-06	0.00011402
Cluster-34894.95997	37.3736	117.619	-1.5527	2.317e-06	0.00011486
Cluster-34894.3115	16.1295	80.5268	-2.0596	2.3453e-06	0.00011595
Cluster-34894.67776	47.2041	152.139	-1.5844	2.3634e-06	0.00011656
Cluster-34894.56553	35.345	116.868	-1.6161	2.3692e-06	0.00011679
Cluster-34894.58281	367.052	1305.86	-1.6976	2.3724e-06	0.00011691
Cluster-34894.6241	16.1143	77.6909	-2.0277	2.3927e-06	0.00011772
Cluster-34894.58796	1.33282	21.7647	-2.8568	2.4493e-06	0.00012011
Cluster-34894.67512	26.1783	87.4841	-1.6234	2.4566e-06	0.00012043
Cluster-34894.53094	9.54184	45.2231	-2.0089	2.4585e-06	0.00012048
Cluster-34894.8481	42.2539	159.066	-1.7593	2.4636e-06	0.00012065
Cluster-34894.50789	33.9416	123.986	-1.7221	2.4645e-06	0.00012066
Cluster-34894.69798	26.4678	82.4069	-1.5374	2.4815e-06	0.00012129
Cluster-34894.59478	9.38511	51.6037	-2.1443	2.4931e-06	0.00012174
Cluster-34894.60220	0.643277	22.8606	-3.061	2.4971e-06	0.0001219
Cluster-34894.57893	21.4972	76.8791	-1.7039	2.5401e-06	0.00012364
Cluster-34894.58700	105.069	391.888	-1.7505	2.5448e-06	0.00012377
Cluster-34894.51901	10.2698	103.559	-2.6274	2.5519e-06	0.00012398
Cluster-34894.46157	12.9193	55.5171	-1.9	2.552e-06	0.00012398
Cluster-34894.84052	8.34277	47.0314	-2.166	2.5562e-06	0.00012414
Cluster-34894.41583	156.834	567.455	-1.7164	2.5963e-06	0.0001256
Cluster-34894.88569	8.13065	42.7819	-2.1048	2.6344e-06	0.00012712
Cluster-34894.91298	25.0994	90.982	-1.7175	2.6635e-06	0.00012828
Cluster-34894.36994	8.46551	49.5228	-2.2044	2.6822e-06	0.00012901
Cluster-34894.69877	22.9166	77.6306	-1.6358	2.6816e-06	0.00012901
Cluster-34894.62151	30.2	165.663	-2.1463	2.7234e-06	0.00013078
Cluster-34894.51032	30.3388	92.6546	-1.5142	2.7901e-06	0.00013352
Cluster-34894.86698	1.31677	22.2782	-2.8582	2.828e-06	0.00013516
Cluster-34894.89326	146.459	458.703	-1.5476	2.866e-06	0.0001365
Cluster-34894.69130	32.4493	107.676	-1.6161	2.8898e-06	0.00013738
Cluster-34894.56663	5.65291	40.7902	-2.387	2.8935e-06	0.00013747
Cluster-34894.75583	16.5578	64.8436	-1.8088	2.8932e-06	0.00013747
Cluster-34894.59162	7.48832	49.5024	-2.3057	2.8987e-06	0.00013767
Cluster-34894.47544	27.1039	81.9564	-1.5057	2.9431e-06	0.00013973
Cluster-34894.8479	8.64836	47.6579	-2.1379	3.0053e-06	0.00014237
Cluster-19252.0	17.5318	67.2898	-1.7798	3.0136e-06	0.00014272
Cluster-34894.90216	18.126	69.9587	-1.7853	3.0172e-06	0.0001428
Cluster-34894.73134	99.0801	456.624	-1.9752	3.0821e-06	0.00014532
Cluster-34894.46606	29.6128	91.5118	-1.5291	3.1252e-06	0.00014708
Cluster-34894.36692	5.86502	46.8918	-2.4559	3.1494e-06	0.00014803
Cluster-34894.68880	60.4501	183.04	-1.5042	3.1736e-06	0.00014898
Cluster-34894.68800	58.6987	179.306	-1.5144	3.1824e-06	0.00014931
Cluster-34894.68258	45.8108	169.59	-1.7374	3.1982e-06	0.00014986
Cluster-34894.100578	14.2833	61.6123	-1.9037	3.2281e-06	0.00015099
Cluster-34894.48036	9.25325	55.1915	-2.2202	3.2342e-06	0.00015122
Cluster-34894.43592	12.0658	54.0915	-1.9415	3.2718e-06	0.00015274
Cluster-34894.46289	1.73282	24.6135	-2.7913	3.3517e-06	0.00015575
Cluster-34894.82335	0.611174	27.2737	-3.0728	3.4063e-06	0.00015794
Cluster-34894.107068	56.9507	213.924	-1.753	3.4173e-06	0.0001584
Cluster-34894.69145	17.7109	72.0347	-1.8347	3.4272e-06	0.00015872
Cluster-14170.2	0.611174	21.8189	-3.0213	3.6294e-06	0.0001669
Cluster-34894.93481	6.85921	40.7714	-2.2104	3.6628e-06	0.00016828
Cluster-34894.39527	1.31677	23.7301	-2.8649	3.6916e-06	0.00016936
Cluster-34894.22770	23.0591	78.9628	-1.6469	3.6918e-06	0.00016936
Cluster-34894.94671	24.2884	85.7022	-1.6862	3.7679e-06	0.00017227
Cluster-34894.51074	17.5601	101.94	-2.1883	3.8393e-06	0.00017505
Cluster-34894.60699	939.856	3005.64	-1.5695	3.8621e-06	0.00017595
Cluster-34894.78280	16.1206	64.1767	-1.8122	3.866e-06	0.00017601
Cluster-34894.55756	12.5666	56.1764	-1.9313	3.9392e-06	0.0001788
Cluster-34894.83345	8.72578	42.0572	-2.0072	3.9651e-06	0.00017981
Cluster-27141.0	19.0686	66.3285	-1.6701	4.0427e-06	0.00018294
Cluster-34894.56062	0	14.1017	-3.1201	4.1061e-06	0.00018554
Cluster-34894.45835	28.3334	91.3447	-1.5727	4.1213e-06	0.00018606
Cluster-34894.61298	26.956	94.6752	-1.6811	4.1259e-06	0.00018615
Cluster-34894.94525	8.05134	45.116	-2.1471	4.1374e-06	0.00018651
Cluster-34894.77831	7.80807	40.356	-2.0783	4.1479e-06	0.00018681
Cluster-34894.91575	43.548	151.752	-1.6685	4.2775e-06	0.00019139
Cluster-34894.28879	112.391	352.291	-1.5439	4.2806e-06	0.00019147
Cluster-34894.85451	9.55694	44.9777	-1.9908	4.421e-06	0.00019693
Cluster-34894.45109	3.56729	27.9769	-2.4195	4.475e-06	0.00019904
Cluster-34894.43602	21.4393	79.1341	-1.7246	4.4855e-06	0.00019945
Cluster-34894.74753	27.9013	92.1463	-1.6	4.5578e-06	0.00020237
Cluster-34894.57696	2.32889	24.1706	-2.6042	4.663e-06	0.00020655
Cluster-34894.60927	0.321638	15.8432	-3.0185	4.7617e-06	0.00021
Cluster-34894.73279	28.5364	114.981	-1.8269	4.804e-06	0.00021162
Cluster-34894.47770	4.50105	39.6894	-2.4984	4.9349e-06	0.00021669
Cluster-34894.60961	8.34088	50.5593	-2.2116	4.983e-06	0.0002186
Cluster-34894.80755	15.2322	57.5933	-1.7529	5.0126e-06	0.00021971
Cluster-34894.34635	98.5611	332.416	-1.6285	5.1204e-06	0.00022366
Cluster-29480.0	12.8419	58.5169	-1.9436	5.2722e-06	0.00022935
Cluster-34894.73509	39.3296	148.772	-1.7586	5.3864e-06	0.00023365
Cluster-34894.31170	8.19297	41.4154	-2.0538	5.4408e-06	0.0002354
Cluster-34894.27247	2.63448	26.9991	-2.5858	5.4543e-06	0.00023585
Cluster-34894.43059	16.9499	61.3669	-1.7059	5.5268e-06	0.00023892
Cluster-34894.61563	2.61843	27.0282	-2.5863	5.6354e-06	0.00024305
Cluster-34894.32482	1.89678	28.3633	-2.7632	5.673e-06	0.00024446
Cluster-13907.0	12.3544	57.3793	-1.9669	5.6952e-06	0.00024521
Cluster-34894.75090	27.7062	88.6783	-1.5641	5.7098e-06	0.0002457
Cluster-34894.18311	34.5229	109.58	-1.5535	5.9368e-06	0.00025345
Cluster-34894.65083	853.029	2643.1	-1.5278	6.1342e-06	0.00026061
Cluster-34894.73623	7.14969	40.4981	-2.1509	6.1771e-06	0.00026199
Cluster-34894.46253	4.91427	43.2717	-2.4931	6.2871e-06	0.00026635
Cluster-34894.4170	5.12733	33.7915	-2.2691	6.3279e-06	0.00026786
Cluster-34894.51497	65.941	343.862	-2.0815	6.3603e-06	0.00026908
Cluster-34894.62998	45.2771	138.539	-1.511	6.3779e-06	0.00026971
Cluster-34894.48204	0.611174	17.7595	-2.9167	6.4159e-06	0.00027105
Cluster-34894.74994	9.17299	42.29	-1.9604	6.8039e-06	0.00028496
Cluster-34894.106816	6.8762	36.2288	-2.0859	6.8334e-06	0.00028604
Cluster-34894.69939	106.523	339.459	-1.5591	6.8734e-06	0.00028756
Cluster-34894.40344	47.6566	144.605	-1.502	6.9409e-06	0.0002899
Cluster-34894.107471	2.94101	31.8082	-2.6038	7.0682e-06	0.00029417
Cluster-34894.44809	12.7384	55.4227	-1.8992	7.1884e-06	0.00029825
Cluster-34894.69630	1.60725	20.7455	-2.6729	7.3039e-06	0.00030254
Cluster-34894.54099	60.3295	184.593	-1.5108	7.4253e-06	0.0003069
Cluster-34894.68079	27.5331	87.4841	-1.5591	7.5033e-06	0.00030944
Cluster-34894.63858	9.29762	46.7066	-2.0454	7.7233e-06	0.00031738
Cluster-34894.47197	16.5981	59.7084	-1.6946	7.7551e-06	0.00031837
Cluster-34894.25010	19.2316	66.3648	-1.6488	7.765e-06	0.00031867
Cluster-34894.76236	6.92969	56.6311	-2.4274	7.8394e-06	0.0003212
Cluster-34894.100811	65.4817	203.899	-1.53	7.8495e-06	0.00032152
Cluster-34894.52875	4.74337	36.386	-2.3738	7.9207e-06	0.00032408
Cluster-34894.66729	93.7098	313.245	-1.6121	8.1692e-06	0.0003329
Cluster-23506.0	19.473	70.8899	-1.7079	8.4501e-06	0.00034323
Cluster-34894.62583	14.1304	74.9455	-2.0832	8.5894e-06	0.00034739
Cluster-34894.46698	74.7498	240.933	-1.5695	8.6595e-06	0.00034957
Cluster-34894.47407	0.352796	19.5122	-2.9814	8.7505e-06	0.0003523
Cluster-34894.71134	12.7724	49.646	-1.7803	8.7627e-06	0.0003526
Cluster-34894.40442	8.73994	44.9967	-2.0545	8.7987e-06	0.00035358
Cluster-34894.75997	12.3019	61.2149	-2.0333	8.8802e-06	0.00035628
Cluster-34894.70502	45.0911	139.093	-1.5171	8.953e-06	0.00035819
Cluster-34894.61671	39.0505	225.602	-2.1642	8.9604e-06	0.00035826
Cluster-34894.64275	9.41721	45.3589	-1.9932	9.0201e-06	0.00035997
Cluster-34894.23733	6.68831	48.9213	-2.3419	9.2988e-06	0.00036954
Cluster-34894.50010	15.7338	72.8693	-1.9501	9.362e-06	0.00037136
Cluster-34894.54745	20.7756	66.2353	-1.5549	9.4475e-06	0.00037416
Cluster-34894.78800	98.8846	380.714	-1.7663	9.5366e-06	0.0003767
Cluster-34894.36276	2.39121	38.7054	-2.7734	9.5975e-06	0.00037861
Cluster-34894.75040	19.7225	79.6792	-1.8098	9.7362e-06	0.00038368
Cluster-34894.21050	10.0435	42.9695	-1.8718	9.7998e-06	0.00038587
Cluster-34894.39059	8.51366	48.6253	-2.1453	1.0085e-05	0.0003957
Cluster-34894.79669	15.6652	55.6996	-1.6795	1.0162e-05	0.00039794
Cluster-34894.84835	7.74576	38.3113	-2.012	1.0191e-05	0.00039868
Cluster-34894.85483	3.66076	30.1751	-2.4267	1.0202e-05	0.000399
Cluster-34894.50801	18.2248	72.0123	-1.786	1.0333e-05	0.00040307
Cluster-34894.57396	28.5091	88.2089	-1.5204	1.0422e-05	0.00040594
Cluster-34894.42192	28.0955	98.5117	-1.6667	1.0431e-05	0.00040616
Cluster-34894.73399	6.30058	61.6334	-2.5275	1.065e-05	0.00041343
Cluster-34894.64961	26.2261	113.416	-1.8809	1.0752e-05	0.00041663
Cluster-34894.88865	5.40176	39.5207	-2.331	1.1099e-05	0.00042807
Cluster-34894.57111	13.0308	58.9623	-1.9303	1.1147e-05	0.0004296
Cluster-34894.58734	2.0233	24.2233	-2.6262	1.1274e-05	0.00043429
Cluster-34894.39247	13.6017	55.8016	-1.8363	1.1392e-05	0.00043792
Cluster-34894.62367	13.5296	58.9726	-1.8885	1.1483e-05	0.00044093
Cluster-34894.74971	2.63353	29.4364	-2.59	1.1606e-05	0.00044446
Cluster-34894.52670	5.81781	34.2532	-2.1617	1.1656e-05	0.00044625
Cluster-34894.18408	22.4291	69.917	-1.5269	1.1978e-05	0.00045668
Cluster-34894.87943	13.5554	70.5928	-2.065	1.2177e-05	0.00046293
Cluster-34894.68613	21.6058	71.3791	-1.5966	1.2175e-05	0.00046293
Cluster-34894.91497	21.7103	70.3297	-1.5693	1.2335e-05	0.00046823
Cluster-34894.84961	19.1611	67.486	-1.6725	1.2381e-05	0.00046962
Cluster-34894.11681	17.5841	68.5933	-1.7827	1.2582e-05	0.0004758
Cluster-26870.2	4.86801	30.5703	-2.2126	1.2763e-05	0.00048144
Cluster-34894.88864	3.75613	34.096	-2.4834	1.2887e-05	0.00048551
Cluster-34894.29377	6.96968	36.9776	-2.0797	1.2982e-05	0.0004886
Cluster-34894.24596	3.18334	36.0689	-2.5891	1.3036e-05	0.0004905
Cluster-34894.47210	10.5219	49.2863	-1.9618	1.3065e-05	0.00049111
Cluster-34894.36683	39.9364	174.401	-1.8929	1.3248e-05	0.00049699
Cluster-34268.0	11.8465	62.3508	-2.0761	1.3258e-05	0.00049725
Cluster-34894.50495	4.59452	32.07	-2.2941	1.3344e-05	0.00050008
Cluster-34894.25534	0.611174	16.4899	-2.828	1.3426e-05	0.00050287
Cluster-34894.78342	13.4389	59.5385	-1.8977	1.3428e-05	0.00050287
Cluster-34894.45640	29.7383	108.099	-1.6996	1.3452e-05	0.00050339
Cluster-34894.87201	15.8531	58.9259	-1.7301	1.3594e-05	0.00050756
Cluster-12379.0	2.61843	24.1429	-2.4731	1.3867e-05	0.00051648
Cluster-34894.75696	4.51521	29.4604	-2.2355	1.3914e-05	0.00051797
Cluster-34894.40624	21.7386	103.873	-1.9776	1.406e-05	0.00052262
Cluster-34894.47748	14.091	58.3231	-1.8379	1.4124e-05	0.00052461
Cluster-34894.51890	239.952	947.85	-1.7879	1.4273e-05	0.00052962
Cluster-34894.67139	6.82805	40.852	-2.1707	1.4348e-05	0.0005319
Cluster-34894.81189	9.88392	50.5544	-2.0309	1.4446e-05	0.0005346
Cluster-34894.19703	0	13.056	-2.9602	1.4509e-05	0.00053654
Cluster-34894.83273	20.5493	65.7005	-1.5538	1.5129e-05	0.00055757
Cluster-34894.41713	32.0156	98.2576	-1.5031	1.5371e-05	0.0005651
Cluster-34894.68982	12.074	64.773	-2.071	1.5379e-05	0.00056527
Cluster-34894.33066	6.35756	41.4609	-2.2445	1.5506e-05	0.00056909
Cluster-14170.0	7.40807	42.2107	-2.1275	1.558e-05	0.00057139
Cluster-34894.31263	12.4828	49.6812	-1.7946	1.5884e-05	0.00058081
Cluster-34894.58869	0	12.4332	-2.9441	1.607e-05	0.00058566
Cluster-34894.84281	9.31995	45.768	-1.9913	1.6177e-05	0.00058914
Cluster-34894.103048	12.9836	48.6318	-1.7269	1.6303e-05	0.00059313
Cluster-34894.53435	0	19.0455	-2.9615	1.6358e-05	0.00059467
Cluster-34894.19125	47.1738	235.234	-2.0122	1.6368e-05	0.00059478
Cluster-8832.1	20.0807	67.1263	-1.6081	1.6389e-05	0.00059541
Cluster-30471.0	1.28561	18.4353	-2.6541	1.6402e-05	0.00059574
Cluster-34894.49297	10.3651	52.1624	-2.0151	1.6431e-05	0.00059649
Cluster-34894.59277	69.601	251.132	-1.6881	1.6515e-05	0.00059897
Cluster-34894.72801	0.321638	14.3358	-2.8691	1.6639e-05	0.00060261
Cluster-34894.40247	20.0628	77.8787	-1.7692	1.7295e-05	0.00062314
Cluster-34894.51138	23.2552	74.1084	-1.5452	1.7355e-05	0.00062462
Cluster-34894.40339	28.9934	98.8147	-1.627	1.758e-05	0.00063165
Cluster-34894.65147	53.6639	176.553	-1.586	1.7925e-05	0.00064184
Cluster-34894.50833	61.0659	245.081	-1.7989	1.81e-05	0.00064757
Cluster-34894.74942	9.41626	45.7149	-1.9817	1.8522e-05	0.00065968
Cluster-34894.70051	0.658383	15.9552	-2.7829	1.8632e-05	0.00066297
Cluster-34894.46101	22.3989	75.2155	-1.6057	1.8826e-05	0.00066895
Cluster-34894.12369	7.86062	54.1861	-2.2658	1.8866e-05	0.00067019
Cluster-26495.0	16.7752	68.44	-1.8099	1.9089e-05	0.00067734
Cluster-34894.55065	7.34575	38.7367	-2.0472	1.9278e-05	0.00068307
Cluster-34894.1936	17.3509	60.5995	-1.6502	1.9568e-05	0.0006914
Cluster-34894.83380	18.0243	58.1143	-1.5644	1.9716e-05	0.00069565
Cluster-34894.43346	7.59596	43.132	-2.1235	1.9725e-05	0.00069579
Cluster-34894.53598	27.102	103.422	-1.7477	1.9739e-05	0.00069613
Cluster-34894.27616	20.2277	62.8506	-1.5186	2.0028e-05	0.00070517
Cluster-34894.96929	8.46645	41.9049	-1.9957	2.0065e-05	0.00070629
Cluster-34894.20904	0.611174	19.2055	-2.8208	2.0071e-05	0.00070635
Cluster-34894.62223	95.6713	313.429	-1.5779	2.0248e-05	0.0007116
Cluster-34894.92350	2.58727	23.4306	-2.4328	2.0795e-05	0.00072827
Cluster-34894.52327	19.4598	61.3393	-1.5323	2.1094e-05	0.00073788
Cluster-34894.21873	49.5339	156.974	-1.5425	2.1498e-05	0.00074905
Cluster-34894.52870	3.2617	28.0324	-2.4063	2.1514e-05	0.00074943
Cluster-34894.8941	4.21057	30.6446	-2.2995	2.1952e-05	0.00076188
Cluster-34894.41960	2.63448	28.7921	-2.5337	2.2686e-05	0.00078248
Cluster-34894.42107	13.7656	54.1834	-1.7776	2.278e-05	0.00078535
Cluster-34894.58868	1.91283	22.0541	-2.5429	2.3162e-05	0.00079633
Cluster-34894.99500	18.3208	71.2459	-1.7689	2.3195e-05	0.00079728
Cluster-34894.71260	10.4737	50.7597	-1.9792	2.3406e-05	0.00080349
Cluster-34894.79331	22.3375	76.7092	-1.6281	2.3979e-05	0.00082068
Cluster-34894.53901	438.939	1346.89	-1.5025	2.4266e-05	0.00082921
Cluster-34894.100919	16.3217	59.1623	-1.686	2.4517e-05	0.00083626
Cluster-29694.0	0.352796	15.1462	-2.8274	2.4848e-05	0.00084541
Cluster-25183.0	7.84017	40.5018	-2.0297	2.4853e-05	0.00084541
Cluster-34894.77073	7.88644	41.4457	-2.0493	2.5171e-05	0.00085449
Cluster-34894.45237	5.68407	34.2194	-2.1647	2.5206e-05	0.0008555
Cluster-34894.50860	19.3804	65.1694	-1.6006	2.545e-05	0.00086222
Cluster-34894.71852	7.78479	83.0268	-2.5301	2.5457e-05	0.00086225
Cluster-34894.80543	14.2229	61.2233	-1.8569	2.5583e-05	0.00086614
Cluster-34894.52780	8.54577	39.7016	-1.9356	2.6066e-05	0.00087926
Cluster-34894.62487	28.9191	104.098	-1.6831	2.6219e-05	0.00088271
Cluster-34894.36130	16.2755	55.2302	-1.6131	2.6352e-05	0.00088661
Cluster-34894.28076	2.24958	22.7901	-2.4761	2.6408e-05	0.00088788
Cluster-34894.102211	6.49319	42.5641	-2.219	2.6509e-05	0.00089032
Cluster-34894.57107	27.6911	86.4647	-1.5178	2.6733e-05	0.00089661
Cluster-34894.38088	22.8631	70.638	-1.5108	2.7119e-05	0.00090754
Cluster-34894.22354	8.72578	39.0083	-1.8927	2.7358e-05	0.00091351
Cluster-34894.94253	21.107	67.1602	-1.5458	2.7717e-05	0.00092284
Cluster-34894.64728	20.1323	124.666	-2.1792	2.7819e-05	0.00092488
Cluster-34894.37824	19.726	76.6079	-1.7596	2.7821e-05	0.00092488
Cluster-36048.0	2.28074	22.5688	-2.4648	2.8007e-05	0.0009292
Cluster-34894.50624	6.1234	34.5589	-2.0947	2.8058e-05	0.00093043
Cluster-34894.65860	11.7121	48.9275	-1.8306	2.8842e-05	0.00095044
Cluster-34894.77888	7.11947	38.6547	-2.0623	2.9014e-05	0.00095443
Cluster-34894.77895	11.7763	44.4253	-1.7275	2.9077e-05	0.00095631
Cluster-34894.58881	5.59059	51.4482	-2.4382	2.9184e-05	0.00095812
Cluster-34894.37053	22.2119	85.2847	-1.743	2.9349e-05	0.00096281
Cluster-34894.87224	36.5129	115.658	-1.5406	2.9352e-05	0.00096281
Cluster-34894.59337	14.5285	56.0218	-1.7468	2.9451e-05	0.00096507
Cluster-34894.88000	7.51948	35.1882	-1.9372	2.98e-05	0.00097497
Cluster-34894.55236	0.705592	19.0391	-2.7644	2.992e-05	0.000978
Cluster-34894.47238	34.0068	113.273	-1.5872	2.9951e-05	0.00097863
Cluster-34894.92990	9.58022	41.7276	-1.8603	3.0131e-05	0.00098407
Cluster-34894.26296	20.9716	67.7313	-1.5548	3.0208e-05	0.00098639
Cluster-34894.2749	20.7926	67.0521	-1.5534	3.0258e-05	0.00098781
Cluster-34894.37668	12.3422	49.9895	-1.7967	3.0422e-05	0.00099229
Cluster-34894.55027	22.2428	82.8206	-1.7152	3.0605e-05	0.00099717
Cluster-34894.68149	7.11853	34.4847	-1.9621	3.0787e-05	0.0010029
Cluster-34894.60292	15.9076	52.6092	-1.5823	3.0834e-05	0.0010038
Cluster-34894.55195	8.26346	40.7561	-1.9734	3.0864e-05	0.0010041
Cluster-34894.65237	18.4608	62.7613	-1.612	3.0954e-05	0.0010062
Cluster-34894.56542	10.4586	41.0871	-1.7676	3.1099e-05	0.0010102
Cluster-34894.68615	8.99926	41.7024	-1.9188	3.1119e-05	0.0010107
Cluster-34894.109669	33.6968	103.974	-1.5024	3.1224e-05	0.0010134
Cluster-34894.110354	5.34732	39.5781	-2.3007	3.1474e-05	0.0010204
Cluster-29665.0	31.699	112.478	-1.6648	3.1645e-05	0.0010251
Cluster-34894.53744	12.2128	54.7813	-1.8925	3.2053e-05	0.0010365
Cluster-34894.38003	29.3194	110.057	-1.721	3.2213e-05	0.0010404
Cluster-34894.55012	2.69774	24.7796	-2.4274	3.2359e-05	0.0010435
Cluster-34894.94927	21.2014	98.9999	-1.9342	3.2721e-05	0.0010527
Cluster-34894.34449	11.9261	49.4383	-1.8139	3.3086e-05	0.0010624
Cluster-34894.65158	2.95612	23.3917	-2.3306	3.3778e-05	0.0010809
Cluster-34894.69422	0.305587	14.7522	-2.7921	3.3806e-05	0.0010816
Cluster-34894.91765	10.5049	44.9804	-1.8514	3.3941e-05	0.0010855
Cluster-34894.56865	11.6196	49.0028	-1.8309	3.408e-05	0.0010882
Cluster-34894.41209	13.3977	50.3405	-1.7208	3.4087e-05	0.0010882
Cluster-34894.15195	7.48738	37.4103	-1.9915	3.4462e-05	0.0010983
Cluster-34894.100628	9.40809	44.4316	-1.9503	3.5114e-05	0.0011161
Cluster-34894.52209	4.86895	29.2037	-2.1347	3.518e-05	0.001118
Cluster-34894.37403	26.7841	104.291	-1.7552	3.5201e-05	0.0011184
Cluster-34894.91360	10.5049	42.1705	-1.7877	3.5885e-05	0.001137
Cluster-34894.21450	7.11853	35.3204	-1.9791	3.6563e-05	0.0011553
Cluster-34894.57274	18.1269	58.03	-1.5429	3.6976e-05	0.0011657
Cluster-34894.37362	10.3944	45.0281	-1.8552	3.709e-05	0.0011688
Cluster-34894.84067	15.781	56.0934	-1.6558	3.71e-05	0.0011689
Cluster-34894.60939	17.0525	57.9569	-1.6044	3.7636e-05	0.0011823
Cluster-34894.85447	15.2964	51.4717	-1.5999	3.7795e-05	0.0011863
Cluster-34894.28931	0.321638	15.7716	-2.7808	3.8904e-05	0.001216
Cluster-34894.95924	0.980022	15.852	-2.6174	3.8958e-05	0.001217
Cluster-34894.73033	2.06957	29.7182	-2.6058	3.9202e-05	0.0012241
Cluster-34894.18176	8.0825	38.3867	-1.9364	3.9364e-05	0.0012274
Cluster-34894.61537	16.9197	56.2245	-1.5858	3.9755e-05	0.0012375
Cluster-34894.22177	2.24958	21.3394	-2.4159	3.9887e-05	0.0012409
Cluster-34894.10801	5.83292	29.8593	-2.0022	3.9973e-05	0.0012428
Cluster-14357.0	0	11.5939	-2.8169	4.0187e-05	0.0012481
Cluster-34894.62085	24.0263	326.727	-2.6001	4.0208e-05	0.0012485
Cluster-34894.88318	0.643277	18.1975	-2.7275	4.0641e-05	0.00126
Cluster-34894.77894	6.23293	32.3771	-2.0186	4.0644e-05	0.00126
Cluster-34894.78867	15.8755	63.015	-1.7681	4.0844e-05	0.0012657
Cluster-34894.38302	1.92889	19.379	-2.4385	4.0917e-05	0.0012677
Cluster-34894.63819	26.4417	88.4112	-1.5909	4.1288e-05	0.0012768
Cluster-13848.0	17.2243	54.4137	-1.5284	4.1778e-05	0.0012888
Cluster-34894.61329	14.655	59.0754	-1.7832	4.2475e-05	0.0013073
Cluster-34894.61831	20.8889	67.9164	-1.5618	4.2482e-05	0.0013073
Cluster-34894.49634	3.24565	23.3225	-2.2551	4.271e-05	0.0013119
Cluster-34894.60291	118.764	370.945	-1.5168	4.3002e-05	0.0013198
Cluster-34894.42958	15.7518	65.9985	-1.8185	4.3165e-05	0.0013237
Cluster-34894.48462	15.0352	55.2655	-1.6933	4.3579e-05	0.0013332
Cluster-34894.110284	24.0675	77.6126	-1.5513	4.3977e-05	0.0013429
Cluster-34894.67986	6.23387	34.0921	-2.0594	4.4051e-05	0.0013448
Cluster-34894.78523	65.5768	228.348	-1.6339	4.4072e-05	0.0013452
Cluster-34894.48778	18.1509	92.4962	-2.0052	4.4136e-05	0.0013461
Cluster-34894.62137	196.546	767.921	-1.7542	4.4403e-05	0.0013534
Cluster-34894.69542	30.8027	97.7998	-1.5392	4.4595e-05	0.0013573
Cluster-34894.27958	1.97609	19.4331	-2.4285	4.4726e-05	0.0013602
Cluster-10748.0	14.0813	60.7733	-1.8432	4.5263e-05	0.0013735
Cluster-34894.44562	8.52971	37.5111	-1.8682	4.5604e-05	0.0013819
Cluster-34894.48742	11.8528	63.6285	-2.0469	4.5757e-05	0.0013843
Cluster-34894.107163	3.85777	25.8442	-2.2011	4.5797e-05	0.0013852
Cluster-34894.54418	0	12.0872	-2.8001	4.5872e-05	0.0013867
Cluster-34894.38174	32.5796	110.666	-1.6106	4.6466e-05	0.0014018
Cluster-34894.55426	0.996073	16.4158	-2.6081	4.6784e-05	0.0014092
Cluster-34300.0	2.13911	26.4607	-2.5178	4.7055e-05	0.0014165
Cluster-34894.72543	24.9921	82.0988	-1.5717	4.7127e-05	0.0014181
Cluster-34894.38305	5.30106	32.1607	-2.1411	4.7216e-05	0.0014196
Cluster-34894.25586	11.2728	48.0731	-1.8421	4.7345e-05	0.0014227
Cluster-34894.56138	13.1305	51.8114	-1.7537	4.8138e-05	0.0014427
Cluster-34894.109189	5.92828	31.4548	-2.0325	4.8322e-05	0.0014472
Cluster-34894.54072	4.83779	27.7428	-2.0861	4.8564e-05	0.0014537
Cluster-34894.95308	5.55849	31.5629	-2.0821	4.9019e-05	0.0014646
Cluster-34894.40387	18.7834	61.2888	-1.5585	4.9505e-05	0.0014778
Cluster-34894.109137	11.0172	48.2191	-1.8684	4.9539e-05	0.0014786
Cluster-34769.1	1.31677	18.6202	-2.5613	4.9628e-05	0.0014806
Cluster-34894.79321	1.36398	30.958	-2.6911	5.0152e-05	0.0014939
Cluster-34894.89142	16.8102	65.537	-1.748	5.0846e-05	0.001511
Cluster-34894.75732	3.19939	24.5405	-2.2811	5.1409e-05	0.0015271
Cluster-34894.95053	30.2664	93.8045	-1.5055	5.1725e-05	0.0015353
Cluster-34894.41050	2.94006	22.3549	-2.2809	5.2561e-05	0.0015552
Cluster-33829.0	0.305587	13.6613	-2.726	5.2958e-05	0.0015657
Cluster-34894.60169	11.0556	43.8188	-1.7632	5.2993e-05	0.0015661
Cluster-34894.97457	10.9068	44.3271	-1.7912	5.3146e-05	0.00157
Cluster-34894.47755	6.10735	31.373	-1.9915	5.3376e-05	0.0015756
Cluster-34894.42997	0.321638	16.9656	-2.7463	5.3405e-05	0.0015761
Cluster-34894.54957	25.7308	86.9579	-1.6001	5.4349e-05	0.0016003
Cluster-34894.41317	10.2414	59.8209	-2.1004	5.4466e-05	0.0016028
Cluster-34894.1876	10.4284	46.9619	-1.8814	5.4993e-05	0.0016158
Cluster-34894.89287	8.4674	35.6966	-1.8209	5.5077e-05	0.0016179
Cluster-35976.0	17.9208	72.1771	-1.7817	5.5164e-05	0.0016195
Cluster-34894.73504	23.8903	81.7058	-1.6101	5.573e-05	0.0016314
Cluster-34894.68016	14.6371	63.1866	-1.8462	5.6819e-05	0.0016587
Cluster-34894.72923	5.30011	33.1537	-2.153	5.7035e-05	0.0016637
Cluster-34894.80751	1.65446	17.8262	-2.4501	5.7136e-05	0.0016654
Cluster-14772.1	4.97847	28.4652	-2.0894	5.7198e-05	0.0016659
Cluster-34894.72590	10.333	40.8267	-1.7544	5.7337e-05	0.0016686
Cluster-34894.49276	13.6489	56.8822	-1.8155	5.8522e-05	0.0016969
Cluster-34894.30727	8.43624	37.8094	-1.8755	5.8905e-05	0.0017054
Cluster-34894.21131	104.282	384.255	-1.6884	5.9681e-05	0.0017245
Cluster-34894.42378	1.96004	18.8719	-2.3944	5.9837e-05	0.0017281
Cluster-30114.0	2.98727	23.6798	-2.3	6.0274e-05	0.0017377
Cluster-34894.63689	13.8128	66.1305	-1.9368	6.0559e-05	0.0017453
Cluster-34894.90148	15.9085	54.377	-1.607	6.0616e-05	0.0017465
Cluster-34894.77879	9.84932	43.2387	-1.86	6.1344e-05	0.0017625
Cluster-34894.68494	18.9653	77.5445	-1.785	6.3101e-05	0.0018047
Cluster-34894.72954	1.57514	20.8473	-2.5152	6.3293e-05	0.0018091
Cluster-34894.78180	19.0053	62.6503	-1.5714	6.3807e-05	0.0018214
Cluster-34894.45419	2.7289	25.3495	-2.3885	6.4552e-05	0.0018392
Cluster-34894.98507	5.04802	31.2975	-2.1267	6.5039e-05	0.001851
Cluster-33025.0	0.352796	13.3908	-2.6932	6.5325e-05	0.0018567
Cluster-34894.66745	125.541	497.073	-1.7583	6.5411e-05	0.0018584
Cluster-29313.0	1.25445	18.9525	-2.5488	6.5705e-05	0.0018657
Cluster-34894.56383	4.3673	36.1153	-2.3249	6.5813e-05	0.0018674
Cluster-34894.5094	0	10.9874	-2.7438	6.5938e-05	0.0018695
Cluster-34894.46004	5.86408	33.1033	-2.0671	6.7792e-05	0.0019145
Cluster-34894.95416	15.5538	51.8353	-1.578	6.8111e-05	0.0019206
Cluster-34894.29190	10.4577	41.0946	-1.7501	6.8642e-05	0.0019333
Cluster-34894.40384	56.0696	184.041	-1.5648	6.9152e-05	0.0019442
Cluster-23968.7	19.3021	63.9353	-1.5667	6.917e-05	0.0019443
Cluster-34894.73104	16.1427	53.8462	-1.5831	6.9435e-05	0.001951
Cluster-34894.33367	7.88738	33.8796	-1.8351	6.9644e-05	0.0019558
Cluster-34894.62086	100.318	849.519	-2.3409	6.9876e-05	0.001962
Cluster-34894.47842	11.1009	61.0855	-2.048	7.0131e-05	0.001968
Cluster-34894.71850	5.07195	54.8633	-2.4562	7.0194e-05	0.0019689
Cluster-34894.82693	15.4711	65.0941	-1.8186	7.042e-05	0.0019732
Cluster-34894.82199	11.7584	45.6837	-1.737	7.0757e-05	0.0019823
Cluster-34894.54050	8.86646	39.9623	-1.8786	7.177e-05	0.0020058
Cluster-34894.88587	4.90011	26.7274	-2.036	7.2237e-05	0.0020161
Cluster-34894.7322	3.93519	24.5456	-2.1357	7.2358e-05	0.0020183
Cluster-34894.60555	10.9049	184.503	-2.6051	7.2462e-05	0.0020203
Cluster-34894.93479	16.3538	57.5558	-1.636	7.2712e-05	0.0020265
Cluster-34894.97	17.8739	73.1621	-1.7835	7.3761e-05	0.0020504
Cluster-34894.43345	3.90404	23.9176	-2.1184	7.4192e-05	0.0020613
Cluster-34894.55186	16.678	93.1134	-2.0539	7.4988e-05	0.0020807
Cluster-34894.68261	7.53553	34.973	-1.9021	7.511e-05	0.0020829
Cluster-34894.38447	6.74968	31.9758	-1.9107	7.6056e-05	0.0021069
Cluster-16153.0	12.0124	47.1155	-1.7524	7.6643e-05	0.0021215
Cluster-34894.54416	22.6802	81.8172	-1.663	7.7478e-05	0.0021395
Cluster-34894.87933	2.61937	22.0667	-2.3148	7.7593e-05	0.0021422
Cluster-34894.65517	53.6554	187.46	-1.6279	7.8314e-05	0.0021595
Cluster-34894.69132	10.953	42.7456	-1.7448	7.8421e-05	0.002162
Cluster-27541.0	9.7209	39.0134	-1.7614	7.8718e-05	0.0021686
Cluster-34894.65559	17.5022	74.0768	-1.8107	7.8858e-05	0.0021709
Cluster-34894.94494	9.10879	37.964	-1.8004	7.9241e-05	0.0021795
Cluster-34894.90032	6.53757	37.8507	-2.0771	7.9527e-05	0.0021865
Cluster-34894.57075	16.001	53.2913	-1.5793	7.9804e-05	0.0021909
Cluster-34894.61302	1.28561	16.0055	-2.4678	8.0203e-05	0.0021987
Cluster-34894.74809	12.6317	46.0398	-1.6661	8.1609e-05	0.0022336
Cluster-34894.38476	4.67383	29.79	-2.1496	8.2256e-05	0.0022468
Cluster-34894.18380	12.7724	44.2453	-1.6188	8.2287e-05	0.0022472
Cluster-34894.75474	7.71365	44.0667	-2.0617	8.2905e-05	0.0022612
Cluster-34894.52304	22.2009	69.44	-1.5083	8.2997e-05	0.0022629
Cluster-34894.48494	10.7179	46.5243	-1.8387	8.3752e-05	0.0022794
Cluster-34894.82854	8.73994	38.3327	-1.844	8.3896e-05	0.0022821
Cluster-18295.0	1.22235	20.4209	-2.5483	8.4952e-05	0.0023075
Cluster-34894.78166	17.4	59.1802	-1.6006	8.5011e-05	0.0023086
Cluster-34894.87626	6.02898	32.9132	-2.0224	8.5117e-05	0.0023105
Cluster-34894.61538	8.75693	35.8236	-1.7795	8.721e-05	0.0023609
Cluster-34894.48723	17.8292	67.9215	-1.7185	8.7357e-05	0.0023634
Cluster-34894.43626	15.4925	54.7558	-1.6338	8.7805e-05	0.0023734
Cluster-34894.97337	17.1085	57.3176	-1.5831	8.8059e-05	0.0023783
Cluster-34894.36344	1.2384	17.7935	-2.5015	8.8724e-05	0.0023944
Cluster-34894.46747	12.2449	46.5832	-1.7071	8.8835e-05	0.0023965
Cluster-34894.57887	17.4667	61.7121	-1.6339	9.0153e-05	0.0024277
Cluster-34894.53357	10.7481	46.6246	-1.8342	9.0177e-05	0.0024279
Cluster-34894.55677	0	11.974	-2.6988	9.0688e-05	0.0024382
Cluster-34894.73510	2.84565	21.5106	-2.2333	9.1024e-05	0.0024455
Cluster-34894.86319	3.53519	24.5418	-2.1866	9.1689e-05	0.0024594
Cluster-34894.56837	99.1873	313.056	-1.5156	9.2042e-05	0.0024667
Cluster-34894.45129	14.8813	49.0634	-1.5585	9.227e-05	0.0024714
Cluster-34894.63436	11.9714	51.3167	-1.8204	9.2993e-05	0.0024851
Cluster-34894.59656	24.3284	106.257	-1.8381	9.3178e-05	0.0024887
Cluster-34894.55310	3.52008	25.1821	-2.2047	9.3395e-05	0.0024941
Cluster-34894.56484	9.14183	38.9302	-1.8157	9.3923e-05	0.002506
Cluster-34894.66512	21.4953	67.3903	-1.5082	9.4127e-05	0.0025094
Cluster-34894.28992	17.1217	55.9224	-1.5556	9.4252e-05	0.0025121
Cluster-34894.71458	8.12971	36.99	-1.8758	9.4304e-05	0.002513
Cluster-34894.101068	1.68561	17.7495	-2.4051	9.5194e-05	0.0025322
Cluster-34894.51824	4.96337	27.7077	-2.0441	9.7145e-05	0.0025769
Cluster-34894.32376	3.84077	25.7447	-2.1631	9.7737e-05	0.0025894
Cluster-34894.61862	18.876	82.5492	-1.8389	9.792e-05	0.0025938
Cluster-34894.96754	15.6029	50.0436	-1.5299	9.8445e-05	0.0026049
Cluster-34894.21275	11.0921	55.8606	-1.9564	9.8556e-05	0.0026065
Cluster-34894.85211	1.94399	18.1371	-2.3411	9.959e-05	0.0026283
Cluster-34894.76654	12.7252	43.5684	-1.6011	0.00010099	0.0026591
Cluster-34894.80322	20.0558	66.1247	-1.5614	0.00010111	0.002661
Cluster-34894.76759	1.97515	22.2908	-2.4267	0.00010166	0.0026717
Cluster-34894.9344	21.613	68.0258	-1.5061	0.00010198	0.0026774
Cluster-34894.87116	1.26956	17.3557	-2.4764	0.00010245	0.0026868
Cluster-34894.107067	8.35693	34.6082	-1.7822	0.00010256	0.0026892
Cluster-34894.40049	13.4317	47.1469	-1.6278	0.00010403	0.0027212
Cluster-34894.35944	14.2109	74.1171	-1.9908	0.00010485	0.0027397
Cluster-34894.45686	36.0767	116.324	-1.5347	0.0001057	0.0027586
Cluster-34894.51224	58.3015	184.723	-1.5197	0.00010586	0.002762
Cluster-18532.0	8.05828	55.3658	-2.1878	0.00010627	0.0027711
Cluster-34894.62406	14.655	51.0679	-1.6196	0.00010635	0.0027728
Cluster-29709.0	1.91283	17.6488	-2.3245	0.00010729	0.0027936
Cluster-34894.7298	3.56729	24.6209	-2.1769	0.00010861	0.0028219
Cluster-34894.65312	35.6843	130.255	-1.668	0.00010858	0.0028219
Cluster-34894.52000	16.7781	53.879	-1.529	0.00011034	0.0028579
Cluster-34894.18296	2.86075	23.0344	-2.2586	0.00011096	0.002871
Cluster-34894.82089	13.078	53.5832	-1.7795	0.00011158	0.0028841
Cluster-34894.14794	5.28406	32.0247	-2.0958	0.00011177	0.0028875
Cluster-34894.5681	14.0259	92.2949	-2.1539	0.00011215	0.0028944
Cluster-34894.53200	9.6888	50.1188	-1.9738	0.00011409	0.0029318
Cluster-34894.92239	3.87193	26.881	-2.1759	0.00011557	0.0029608
Cluster-34894.103885	3.95124	23.3439	-2.0748	0.0001156	0.0029612
Cluster-34894.52967	6.9769	34.4559	-1.9266	0.00011629	0.0029763
Cluster-34894.22568	10.4976	50.3356	-1.9239	0.00011823	0.0030167
Cluster-34894.72436	7.74576	34.4596	-1.8466	0.00011827	0.0030172
Cluster-34894.53096	1.60725	17.7079	-2.3937	0.00011854	0.0030226
Cluster-34894.89738	13.691	48.6822	-1.6375	0.00011865	0.0030248
Cluster-34894.2329	9.38511	36.1093	-1.7102	0.00011906	0.0030333
Cluster-34894.76430	10.8747	53.9169	-1.9451	0.00011956	0.0030412
Cluster-34894.20041	3.37123	29.5563	-2.3121	0.00011996	0.003049
Cluster-34894.69610	19.0544	61.2753	-1.5339	0.00012089	0.0030679
Cluster-34894.42021	30.0449	103.864	-1.6079	0.00012194	0.0030924
Cluster-34894.52218	9.80022	36.3987	-1.6795	0.00012208	0.0030955
Cluster-34894.31175	4.27288	23.9239	-2.0323	0.00012513	0.0031601
Cluster-34894.41634	2.32889	19.7853	-2.2855	0.00012608	0.0031817
Cluster-34894.90034	25.6987	84.4717	-1.5549	0.00012653	0.0031907
Cluster-23955.0	0	10.654	-2.6407	0.00012931	0.0032503
Cluster-34894.95921	5.41686	28.5821	-1.9768	0.00013157	0.0032934
Cluster-34894.63805	9.0172	48.6091	-2.0015	0.00013265	0.0033173
Cluster-34894.79320	29.0352	125.279	-1.8189	0.00013351	0.0033372
Cluster-34894.82981	5.65291	31.164	-2.0212	0.00013425	0.0033533
Cluster-34894.47772	3.00333	24.7054	-2.2666	0.00013643	0.0033988
Cluster-34894.53590	16.0152	55.1813	-1.6009	0.00013813	0.0034316
Cluster-34894.41319	1.26956	16.748	-2.4336	0.00013886	0.0034474
Cluster-34894.81065	12.678	42.6285	-1.5755	0.00013928	0.0034561
Cluster-13652.0	6.47714	34.8156	-1.993	0.00013937	0.0034578
Cluster-34894.77448	11.4216	42.3025	-1.6744	0.00014045	0.0034793
Cluster-34894.58322	20.6339	68.3807	-1.5596	0.00014075	0.003484
Cluster-34894.50009	8.22507	35.3544	-1.8133	0.00014313	0.0035322
Cluster-34894.68698	8.13065	36.5435	-1.8511	0.00014385	0.0035477
Cluster-34894.92014	16.6827	52.9728	-1.5088	0.00014471	0.0035644
Cluster-34894.79330	187.764	640.895	-1.5912	0.00014474	0.0035645
Cluster-34894.103403	7.82412	34.8672	-1.8419	0.00014525	0.0035745
Cluster-34894.77127	15.7134	49.5277	-1.508	0.00014526	0.0035745
Cluster-17331.0	1.02723	17.3771	-2.4997	0.0001458	0.0035849
Cluster-34894.23214	12.9515	43.3519	-1.5663	0.00014742	0.0036188
Cluster-34894.41952	8.54482	34.7855	-1.7635	0.00015018	0.0036704
Cluster-34894.22400	11.2114	41.0555	-1.6639	0.00015095	0.0036838
Cluster-34894.64341	8.26157	37.1738	-1.8405	0.00015143	0.0036939
Cluster-34894.32442	8.56715	39.7559	-1.8677	0.00015443	0.0037497
Cluster-34894.56672	17.342	60.1753	-1.6034	0.00015465	0.0037539
Cluster-28245.4	11.8147	46.1781	-1.7133	0.00015639	0.0037895
Cluster-34894.23798	11.8547	41.0669	-1.6072	0.00015638	0.0037895
Cluster-34894.76994	34.3348	108.667	-1.5123	0.00015645	0.0037897
Cluster-34894.44453	3.7794	26.0681	-2.1479	0.00015656	0.0037911
Cluster-34894.56533	12.8589	47.2439	-1.659	0.00015707	0.0038012
Cluster-34894.25247	6.71758	33.7161	-1.9308	0.00015779	0.0038136
Cluster-34894.37398	0	11.5109	-2.6093	0.00015922	0.0038409
Cluster-34894.78118	0.305587	12.3829	-2.5678	0.00016004	0.0038568
Cluster-34894.74516	12.2858	46.6765	-1.699	0.00016015	0.0038584
Cluster-34894.60356	9.64348	37.5174	-1.71	0.00016116	0.0038776
Cluster-34894.104298	4.43684	26.8808	-2.0643	0.00016138	0.0038817
Cluster-34894.3496	15.038	50.616	-1.5729	0.00016284	0.0039106
Cluster-34894.7594	13.7534	48.1989	-1.6172	0.0001666	0.0039889
Cluster-34894.38172	11.9242	41.1701	-1.5928	0.00016775	0.0040132
Cluster-34894.47040	4.068	28.2375	-2.1468	0.00016797	0.0040152
Cluster-34894.36518	2.90796	24.3142	-2.2529	0.00016865	0.0040295
Cluster-34894.47313	56.2304	202.575	-1.6428	0.00016914	0.0040381
Cluster-34894.61006	1.38003	18.4944	-2.4303	0.00016933	0.0040407
Cluster-34894.59825	20.65	67.2848	-1.5386	0.00016945	0.0040428
Cluster-34894.59721	2.26563	18.8833	-2.2458	0.00016963	0.004046
Cluster-34894.32480	18.9962	62.3977	-1.5544	0.00017039	0.0040616
Cluster-34894.30280	2.90891	20.9531	-2.169	0.00017177	0.0040901
Cluster-34894.52017	6.75252	56.3969	-2.261	0.00017204	0.0040945
Cluster-34894.57801	4.86801	353.899	-2.6008	0.00017258	0.0041053
Cluster-34894.78539	6.27919	29.9776	-1.8987	0.00017378	0.0041306
Cluster-34894.23478	7.76181	31.436	-1.7476	0.00017449	0.0041456
Cluster-11213.1	4.96242	26.3738	-1.9794	0.00017717	0.004196
Cluster-34894.13697	12.0819	46.4348	-1.7006	0.00017724	0.0041963
Cluster-34894.95714	14.1738	45.7718	-1.5241	0.00017724	0.0041963
Cluster-34894.59260	20.6277	76.6947	-1.6737	0.00017766	0.0042041
Cluster-34894.54456	15.3499	51.7512	-1.5684	0.00017777	0.004206
Cluster-34894.63014	9.47952	41.9627	-1.8322	0.00017812	0.0042124
Cluster-34894.8510	10.1681	41.0744	-1.7521	0.00017937	0.0042366
Cluster-34894.38295	11.8396	40.9511	-1.6022	0.00018034	0.0042537
Cluster-34894.77698	14.0429	48.9805	-1.6102	0.00018046	0.0042557
Cluster-34894.56264	0.627226	13.4147	-2.4959	0.00018145	0.004277
Cluster-34894.66031	177.321	607.685	-1.5899	0.0001822	0.0042895
Cluster-34894.49352	9.15883	44.1965	-1.9036	0.00018317	0.0043102
Cluster-34894.68071	222.251	719.647	-1.5313	0.00018395	0.0043251
Cluster-34894.88036	4.80664	26.6972	-1.9997	0.00018691	0.0043798
Cluster-34894.64051	28.6538	92.1567	-1.5257	0.00018782	0.0043976
Cluster-34894.21058	5.26801	31.567	-2.0604	0.00018825	0.004403
Cluster-34894.109948	8.14671	33.6215	-1.7645	0.0001882	0.004403
Cluster-34894.60739	3.35612	32.5963	-2.3211	0.00018867	0.0044079
Cluster-34894.56324	1.34887	15.3336	-2.365	0.00018903	0.0044143
Cluster-34894.75460	23.1454	74.7373	-1.5299	0.00019056	0.0044384
Cluster-34894.16176	13.6127	46.9621	-1.5933	0.00019109	0.0044486
Cluster-34894.28309	5.87918	29.0377	-1.9158	0.00019185	0.0044625
Cluster-34894.65787	11.8405	43.2878	-1.6561	0.0001924	0.0044715
Cluster-34894.63470	10.9763	38.2358	-1.6004	0.0001934	0.0044907
Cluster-34894.65425	3.95124	22.9412	-2.0373	0.00019532	0.004531
Cluster-34894.81648	1.34887	17.7483	-2.4062	0.00019559	0.004536
Cluster-34894.30879	12.0186	40.1786	-1.5597	0.00019593	0.004543
Cluster-29250.0	0	10.0865	-2.5725	0.00019626	0.0045485
Cluster-22263.0	1.89678	21.0991	-2.3524	0.00019773	0.0045729
Cluster-34894.103404	10.4756	40.9008	-1.7128	0.00020069	0.0046277
Cluster-34894.40039	0.611174	12.9642	-2.4782	0.00020085	0.0046291
Cluster-30199.1	22.4722	73.8193	-1.5393	0.00020134	0.0046371
Cluster-34894.106397	2.55517	19.8735	-2.1974	0.0002018	0.0046453
Cluster-34894.108307	11.7452	44.1813	-1.6767	0.00020217	0.0046521
Cluster-34894.60274	1.57609	17.0914	-2.3341	0.00020265	0.004661
Cluster-34894.42615	2.58821	23.3755	-2.2734	0.0002033	0.0046721
Cluster-34894.87594	14.3173	51.4176	-1.6352	0.00020328	0.0046721
Cluster-34894.41080	11.4377	39.7847	-1.602	0.00020326	0.0046721
Cluster-34894.4458	0.964915	15.6695	-2.4408	0.00020482	0.0046986
Cluster-34894.47127	0	9.99333	-2.5644	0.00020582	0.0047186
Cluster-34894.95778	3.5975	44.1185	-2.3941	0.00020655	0.0047334
Cluster-34894.55611	3.34007	34.0732	-2.329	0.00020746	0.0047507
Cluster-34894.73583	2.92496	20.1378	-2.1332	0.00021023	0.0048
Cluster-34894.81760	12.4989	48.3877	-1.7093	0.00021083	0.0048122
Cluster-34894.37600	13.8298	45.0481	-1.5385	0.00021164	0.004827
Cluster-34102.0	15.9164	51.8191	-1.541	0.00021223	0.0048369
Cluster-34894.8480	55.1031	182.128	-1.5473	0.00021286	0.0048483
Cluster-34894.3786	6.24803	28.7469	-1.858	0.00021367	0.0048624
Cluster-34894.108101	3.30891	21.1695	-2.0923	0.00021489	0.0048849
Cluster-34894.64939	4.3352	24.7896	-2.0234	0.00021509	0.0048889
Cluster-34894.51663	11.5724	44.097	-1.6861	0.00021695	0.0049267
Cluster-34894.66526	12.9612	49.057	-1.6866	0.00021705	0.0049273
Cluster-34894.31636	7.11758	31.4007	-1.8165	0.00021712	0.0049283
Cluster-34894.67100	99.401	316.011	-1.5082	0.00021815	0.0049463
Cluster-34894.60467	16.385	60.8269	-1.6633	0.00021911	0.004966
Cluster-34894.31229	0.948864	13.918	-2.4061	0.0002199	0.0049786
Cluster-34894.77072	4.38963	26.5739	-2.0445	0.00022088	0.0049992
Cluster-34894.28001	21.7572	97.1166	-1.8269	0.00022474	0.00507
Cluster-34894.10042	12.3252	40.2855	-1.5338	0.00022595	0.0050911
Cluster-30221.0	6.05386	36.3774	-2.0586	0.0002261	0.0050937
Cluster-34894.64276	14.9748	53.3325	-1.6223	0.0002263	0.0050945
Cluster-34894.51343	16.7922	54.0562	-1.5153	0.00022703	0.005107
Cluster-34894.5388	4.7201	29.0564	-2.0726	0.00022777	0.0051207
Cluster-11153.0	1.92794	17.8716	-2.2683	0.00022809	0.005126
Cluster-34894.56174	21.9051	84.1452	-1.6986	0.00022828	0.0051284
Cluster-34894.100723	5.7234	33.4947	-2.0254	0.00022883	0.0051399
Cluster-32342.0	1.68561	16.4258	-2.2954	0.00023041	0.0051692
Cluster-34894.60667	23.9218	78.9289	-1.5411	0.00023064	0.0051735
Cluster-34894.52397	18.2516	60.0141	-1.5397	0.00023162	0.005191
Cluster-34894.84288	10.9933	40.5171	-1.6532	0.00023245	0.0052031
Cluster-34894.55456	22.3989	74.0246	-1.547	0.0002324	0.0052031
Cluster-23931.0	2.89286	20.0057	-2.1246	0.00023345	0.0052211
Cluster-34894.64450	0.352796	11.0781	-2.4991	0.00023354	0.0052222
Cluster-34894.73604	23.1356	76.7626	-1.5527	0.00023488	0.0052483
Cluster-34894.72130	7.10153	31.9795	-1.8305	0.00023495	0.0052485
Cluster-34894.31274	16.1036	53.0598	-1.5421	0.00023538	0.0052557
Cluster-34894.70206	21.3433	91.071	-1.7882	0.00023701	0.0052874
Cluster-34894.84925	8.4353	34.8333	-1.7575	0.00023961	0.005329
Cluster-34894.61301	1.33282	14.4527	-2.3209	0.00024328	0.0053929
Cluster-34894.18540	12.2128	51.9804	-1.7835	0.00024409	0.0054084
Cluster-34894.42380	14.4108	56.4912	-1.7148	0.00025063	0.0055195
Cluster-34894.82141	5.54244	26.755	-1.8846	0.00025107	0.0055257
Cluster-34894.53384	17.9309	59.2205	-1.5472	0.00025321	0.0055655
Cluster-12739.0	8.66157	39.314	-1.8311	0.00025425	0.0055836
Cluster-34894.67845	13.7515	46.4221	-1.5681	0.00025563	0.0056078
Cluster-19183.0	23.85	77.0418	-1.5269	0.00026062	0.005705
Cluster-34894.72988	10.4256	41.1501	-1.7165	0.00026236	0.0057365
Cluster-34894.40443	7.3297	31.2258	-1.7728	0.00026436	0.0057703
Cluster-36520.1	7.14874	32.4238	-1.8343	0.0002676	0.0058323
Cluster-34894.57805	4.68799	25.4766	-1.9788	0.00026856	0.0058466
Cluster-34894.65259	9.07763	34.7906	-1.6848	0.00026852	0.0058466
Cluster-34894.109091	6.10641	31.7278	-1.9331	0.00026973	0.0058705
Cluster-34894.110144	6.05291	28.8678	-1.8833	0.00027066	0.0058838
Cluster-30967.0	0	13.3103	-2.5203	0.00027342	0.005937
Cluster-34894.109950	9.71368	40.7938	-1.7769	0.00027573	0.0059799
Cluster-34894.51814	2.29679	19.9164	-2.2282	0.00027672	0.0059966
Cluster-34894.52028	1.54399	20.7367	-2.3669	0.00028175	0.0060919
Cluster-34894.40228	7.68533	37.6897	-1.89	0.00028172	0.0060919
Cluster-34894.34421	9.46442	37.4014	-1.7146	0.000284	0.0061262
Cluster-34894.21800	8.24018	32.557	-1.7165	0.00028442	0.0061317
Cluster-34894.100605	1.30166	14.6478	-2.3119	0.00028466	0.0061343
Cluster-34894.69758	18.4004	64.6105	-1.5988	0.00028496	0.0061389
Cluster-34894.75301	15.0852	49.3829	-1.5364	0.00028918	0.0062046
Cluster-34894.76947	13.8289	44.9451	-1.5284	0.00029019	0.0062222
Cluster-34894.69154	5.94339	28.2473	-1.8709	0.00029179	0.0062538
Cluster-34894.18167	7.29226	31.4209	-1.7919	0.00029295	0.0062733
Cluster-34894.39487	5.18964	25.8126	-1.8982	0.0002934	0.0062795
Cluster-34894.78854	4.78336	29.9084	-2.068	0.00029503	0.0063045
Cluster-34894.28684	9.7379	34.4345	-1.606	0.00029527	0.0063075
Cluster-34894.10023	9.49463	35.7568	-1.6678	0.00029579	0.0063144
Cluster-34894.52779	9.14183	35.6234	-1.6988	0.00029603	0.0063169
Cluster-34894.49891	16.5446	52.6897	-1.5081	0.0003015	0.0064108
Cluster-17321.0	0	10.7974	-2.501	0.00030207	0.0064202
Cluster-34894.5591	8.72672	33.263	-1.6739	0.0003024	0.0064236
Cluster-34894.75471	4.13126	24.416	-2.0126	0.00030318	0.0064376
Cluster-34894.70090	10.75	37.2077	-1.5868	0.00030344	0.0064413
Cluster-14514.0	3.7152	26.4405	-2.1174	0.00030414	0.0064522
Cluster-34894.41344	5.74638	31.602	-1.9832	0.0003048	0.0064638
Cluster-34894.49943	8.8523	34.0695	-1.6875	0.00030486	0.0064642
Cluster-34894.56519	5.44802	25.8818	-1.8581	0.0003056	0.0064772
Cluster-34894.80925	20.7913	72.1794	-1.5966	0.00030894	0.0065358
Cluster-34894.89565	14.8152	48.0945	-1.5182	0.0003095	0.0065444
Cluster-21357.0	12.9826	43.5194	-1.5554	0.00031018	0.006553
Cluster-34894.68198	10.2386	38.7793	-1.6636	0.00031079	0.0065631
Cluster-18690.0	2.61843	18.595	-2.1214	0.00031136	0.0065743
Cluster-34894.51925	3.53519	21.9195	-2.0406	0.00031382	0.0066169
Cluster-18868.0	11.4386	42.8563	-1.6654	0.00031491	0.006637
Cluster-34894.41415	6.4441	27.6447	-1.7772	0.00031505	0.0066391
Cluster-34894.29924	8.8523	39.441	-1.8132	0.0003172	0.0066761
Cluster-34894.71046	4.83779	24.275	-1.8988	0.00032202	0.0067641
Cluster-28528.0	1.89678	18.9259	-2.2615	0.00032572	0.0068191
Cluster-34894.50917	3.19939	22.6467	-2.1132	0.00032629	0.0068291
Cluster-34894.45852	0.305587	10.9484	-2.4509	0.00032925	0.0068797
Cluster-34894.73062	8.4825	35.0271	-1.7443	0.00033511	0.006983
Cluster-34894.109134	3.38728	23.2055	-2.1092	0.000338	0.0070295
Cluster-34894.59904	1140.96	8893.01	-2.1783	0.00033881	0.0070441
Cluster-34894.28819	16.3519	57.8929	-1.6053	0.0003411	0.0070801
Cluster-34894.68039	19.2118	109.047	-1.9912	0.00034217	0.0070994
Cluster-34894.49206	4.42079	24.4726	-1.9597	0.00034371	0.0071275
Cluster-32590.0	2.81449	22.3938	-2.1641	0.0003473	0.007188
Cluster-34894.76406	4.28893	23.6056	-1.9658	0.00034839	0.0072047
Cluster-34894.71285	8.42113	32.727	-1.6904	0.00034895	0.0072123
Cluster-34894.11037	10.2012	38.5554	-1.6668	0.00035456	0.0073103
Cluster-17405.0	0	10.9372	-2.4723	0.00035649	0.0073419
Cluster-34894.102716	13.4128	43.5193	-1.5199	0.00035696	0.0073495
Cluster-34894.279	0.321638	10.9195	-2.4371	0.00035822	0.0073694
Cluster-34894.30669	14.0249	51.2794	-1.6375	0.00035819	0.0073694
Cluster-34894.50493	7.80807	33.97	-1.7849	0.00036081	0.0074178
Cluster-34894.60563	22.6774	106.638	-1.8538	0.00036339	0.0074647
Cluster-34894.47215	13.455	47.8568	-1.6027	0.00036404	0.007476
Cluster-34894.99402	0.674435	11.4719	-2.3713	0.00036791	0.0075401
Cluster-34894.86045	3.48798	21.6212	-2.0275	0.00036846	0.0075495
Cluster-34894.34594	0.948864	12.9516	-2.327	0.00037087	0.0075893
Cluster-34894.57788	9.69069	396.404	-2.4606	0.00037445	0.0076511
Cluster-31720.0	0	10.201	-2.4624	0.00037577	0.0076729
Cluster-34894.63016	15.7357	75.0905	-1.8583	0.00037573	0.0076729
Cluster-34894.39792	4.59358	24.2348	-1.9344	0.00037694	0.0076937
Cluster-34894.71018	9.65859	35.5179	-1.6359	0.00037727	0.0076985
Cluster-34894.55832	4.62473	26.1876	-1.9813	0.00037839	0.0077171
Cluster-34894.71970	13.9655	45.5414	-1.5214	0.00038091	0.0077568
Cluster-34894.78117	5.93362	32.8315	-1.954	0.00038243	0.0077763
Cluster-34894.30717	3.58334	20.8852	-1.9929	0.00038253	0.0077773
Cluster-34894.50437	26.6094	98.2459	-1.6418	0.00038263	0.0077781
Cluster-34894.78803	8.46645	32.7458	-1.685	0.00038318	0.0077864
Cluster-34894.108309	17.3339	57.7844	-1.5424	0.0003859	0.0078226
Cluster-34894.97672	8.2855	37.6822	-1.8243	0.00038835	0.0078596
Cluster-34894.57814	10.7953	41.8231	-1.6833	0.00039487	0.0079612
Cluster-34894.41967	15.0131	48.2958	-1.5017	0.00039563	0.0079736
Cluster-34894.68323	2.95706	24.6715	-2.1834	0.0003963	0.0079839
Cluster-34894.55678	7.18179	29.0528	-1.7228	0.0003967	0.0079898
Cluster-34894.31524	23.7216	80.3693	-1.5603	0.00039677	0.0079902
Cluster-34894.67274	0.627226	11.5386	-2.3661	0.00039865	0.0080145
Cluster-34894.11473	7.45433	35.4472	-1.8523	0.00039862	0.0080145
Cluster-34894.9940	1.89773	19.1186	-2.2458	0.0003992	0.0080221
Cluster-34894.79601	8.01924	34.5026	-1.7695	0.00040412	0.0081101
Cluster-34894.59386	36.3111	131.299	-1.619	0.0004053	0.0081297
Cluster-34894.43385	10.3258	37.0831	-1.6214	0.00040656	0.0081482
Cluster-34894.66008	19.7002	68.9537	-1.5876	0.00040961	0.0081929
Cluster-34894.42568	9.58621	45.5151	-1.854	0.00041616	0.0083062
Cluster-34894.14291	0	8.88604	-2.4425	0.00041704	0.0083227
Cluster-34894.83733	7.37596	32.6765	-1.791	0.00042083	0.0083828
Cluster-34894.2141	1.38003	26.604	-2.387	0.00042566	0.0084601
Cluster-34894.89426	7.19784	31.0785	-1.7739	0.00042585	0.0084627
Cluster-34894.57973	7.07227	204.201	-2.4247	0.00043257	0.0085759
Cluster-34894.38300	0.627226	12.2395	-2.3646	0.00043315	0.008584
Cluster-34894.59670	2.64958	20.768	-2.1465	0.00043371	0.0085929
Cluster-34894.64851	8.13065	32.1242	-1.6983	0.00043737	0.0086506
Cluster-34894.43816	4.20962	22.6506	-1.9345	0.0004381	0.0086627
Cluster-34894.66653	6.85921	28.3582	-1.7378	0.00044096	0.0087067
Cluster-34894.90858	9.65859	34.9515	-1.6126	0.0004409	0.0087067
Cluster-34894.55671	23.1463	75.077	-1.5161	0.00044145	0.0087142
Cluster-34894.43243	4.20962	22.7197	-1.9354	0.00044375	0.008747
Cluster-34894.73528	4.16336	26.1966	-2.0297	0.00044544	0.0087757
Cluster-34894.32270	3.24565	19.3122	-1.9948	0.00045046	0.0088422
Cluster-34894.60489	39.5253	128.868	-1.5167	0.00045441	0.0089012
Cluster-31865.0	11.2337	37.8633	-1.5429	0.00045567	0.0089223
Cluster-34894.18991	10.9914	37.4744	-1.5584	0.00045888	0.0089725
Cluster-34894.99573	0	9.41328	-2.4256	0.00045997	0.0089892
Cluster-34894.88535	8.60714	35.2221	-1.7308	0.00045995	0.0089892
Cluster-34894.41171	0.980022	12.3665	-2.2855	0.00046249	0.0090325
Cluster-34894.38356	12.537	63.8558	-1.905	0.00046296	0.0090405
Cluster-34894.50438	28.9125	97.5398	-1.5479	0.00046456	0.0090682
Cluster-34894.54237	7.18179	32.1319	-1.7979	0.00046641	0.0090961
Cluster-34894.51753	2.541	19.8056	-2.1303	0.00046664	0.0090994
Cluster-34894.31116	13.7105	47.6756	-1.5748	0.00046777	0.0091101
Cluster-34894.100920	9.86253	35.4612	-1.6147	0.00046888	0.0091195
Cluster-34894.76341	2.66658	21.7697	-2.1581	0.00047186	0.0091667
Cluster-34894.56844	1.05839	18.1243	-2.3509	0.00047595	0.0092325
Cluster-34894.87355	7.50437	32.9899	-1.7821	0.00047615	0.0092335
Cluster-34894.87934	4.20962	23.379	-1.9493	0.00048312	0.0093459
Cluster-34894.37618	2.58821	19.0154	-2.1022	0.00048407	0.0093628
Cluster-34894.35401	13.4317	43.6149	-1.514	0.00048712	0.0094111
Cluster-34894.45123	6.03087	37.6508	-2.0193	0.00049431	0.0095232
Cluster-34894.44500	10.007	46.2888	-1.8271	0.00049682	0.0095591
Cluster-34894.13280	15.3285	55.2778	-1.6098	0.00049803	0.0095728
Cluster-34894.53603	12.1131	39.162	-1.5101	0.00049943	0.0095935
Cluster-29673.0	6.82899	27.8989	-1.7216	0.00050051	0.0096093
Cluster-34894.28869	0	8.44316	-2.4091	0.00050156	0.0096271
Cluster-34894.90212	12.9203	44.2101	-1.5608	0.00050335	0.0096538
Cluster-34894.32636	1.62235	15.1536	-2.1936	0.0005035	0.0096544
Cluster-34894.36475	0	10.2602	-2.4098	0.00050383	0.0096584
Cluster-34894.36201	12.5524	40.8971	-1.5075	0.00050984	0.0097587
Cluster-25024.0	2.94101	24.2285	-2.1548	0.00051474	0.0098386
Cluster-34894.88600	1.97515	17.577	-2.1799	0.00051593	0.009859
Cluster-34894.105470	6.66409	27.9555	-1.7489	0.00051747	0.0098834
Cluster-34894.50947	78.5563	544.476	-2.0821	0.00052463	0.0099922
